# Supplementary material for: Transcriptome Profiling Unveils Key Genes Regulating the Growth and Development of Yangzhou Goose Knob
Source: MDPI journal article supplement (doi:10.3390/ijms25084166), 2024-04-10

Figure S1. Density chart of mRNA expression level.

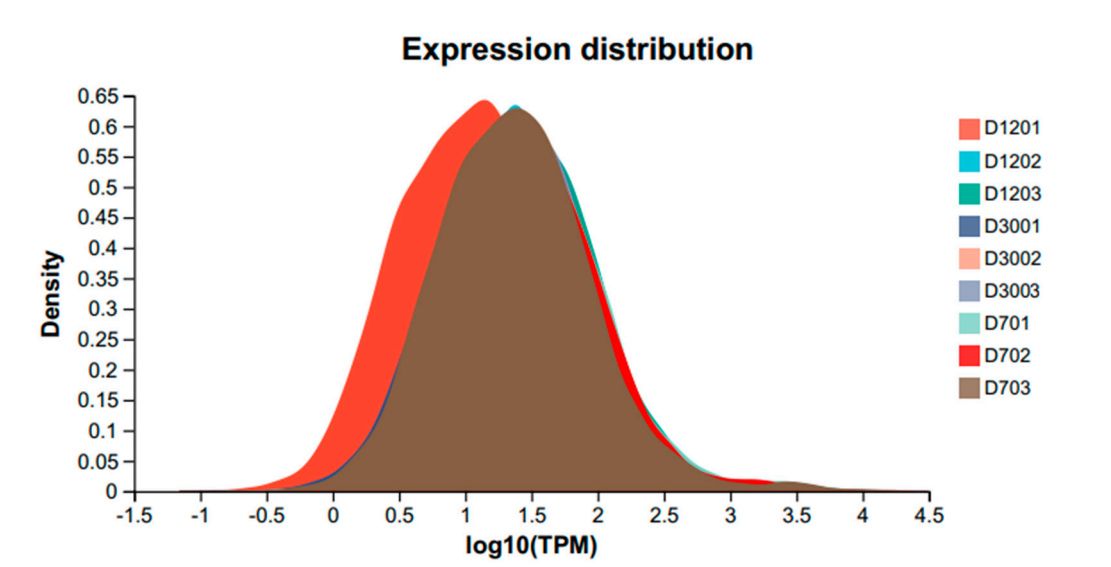

Figure S2. Box plot of mRNA expression level.

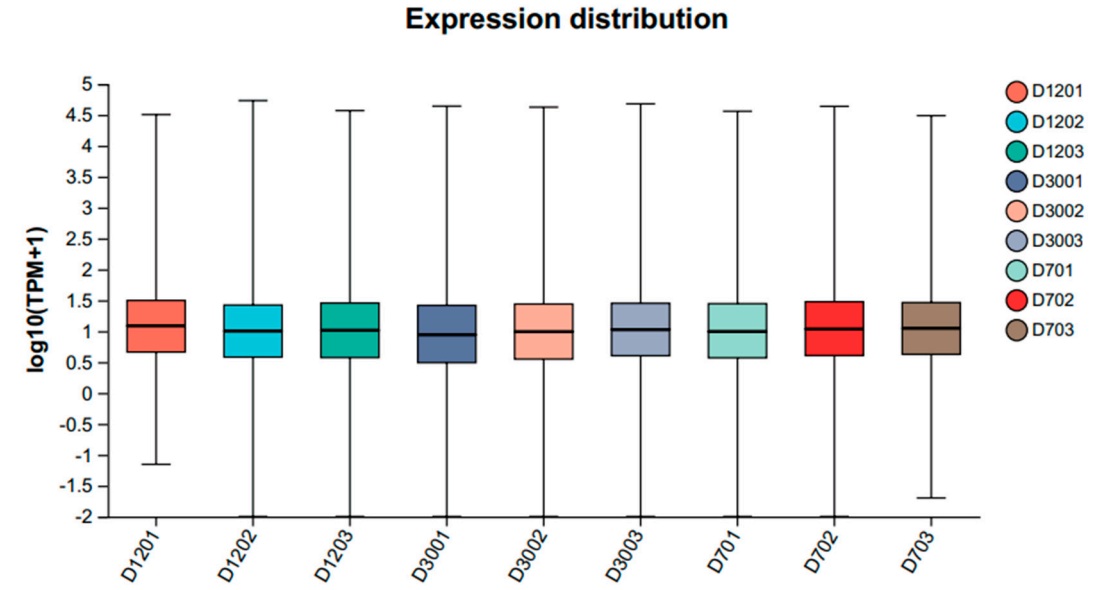

Figure S3. GO enrichment functional analysis of DEGs.

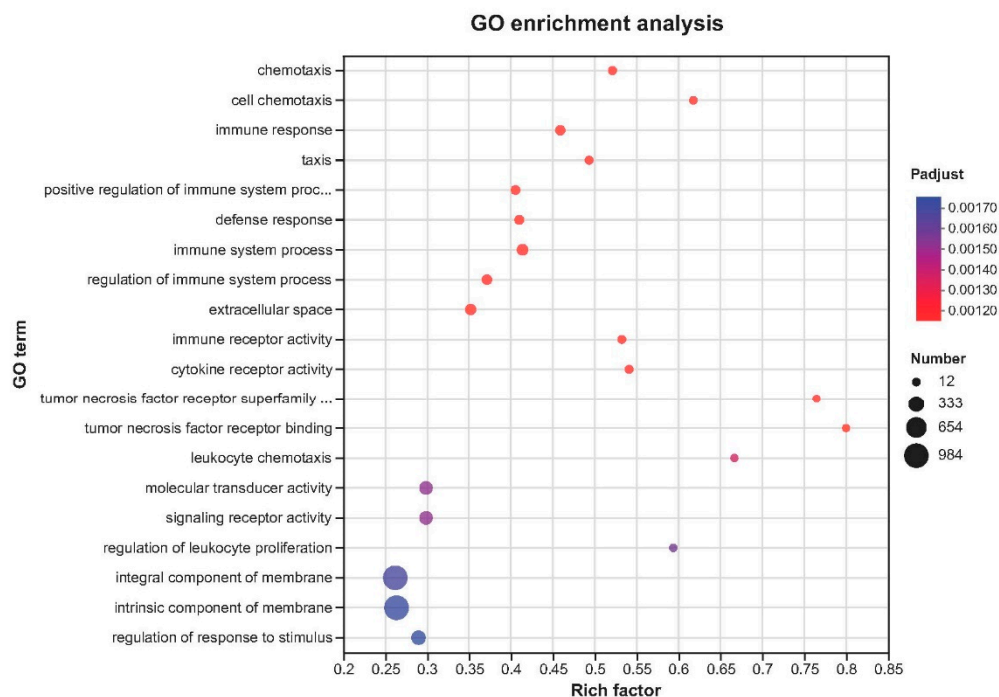

**Figure S4. KEGG enrichment functional analysis of DEGs.**

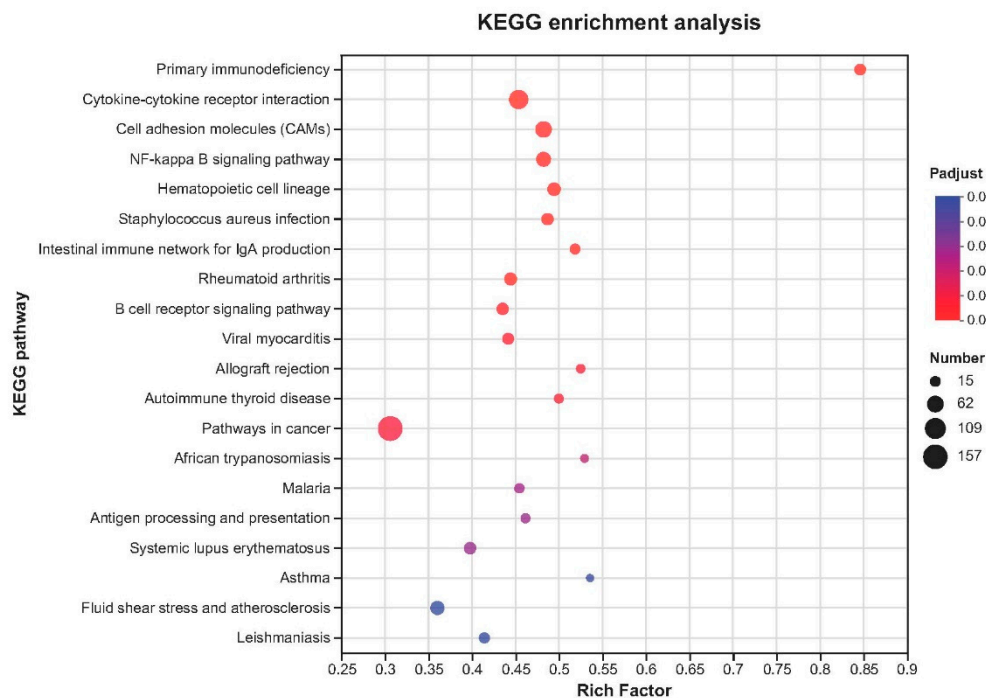

**Figure S5. GO and KEGG network diagrams of each comparison group during the morphogenesis of goose knob. Note: Figure S5-a compares 70 vs 120, Figure S5-b compares**

**70 vs 300, and Figure S5-c compares 120 vs 300.**

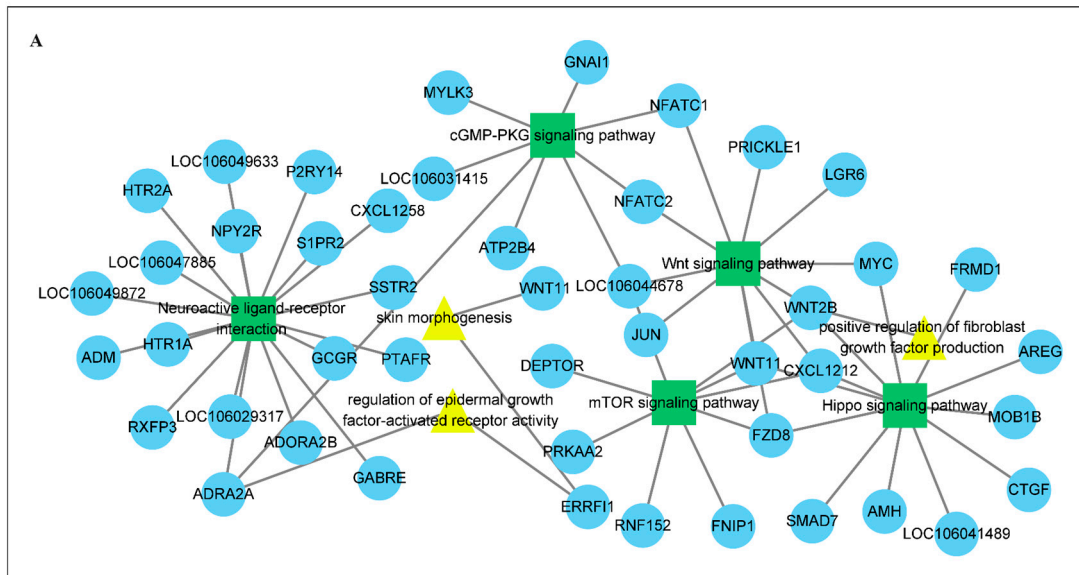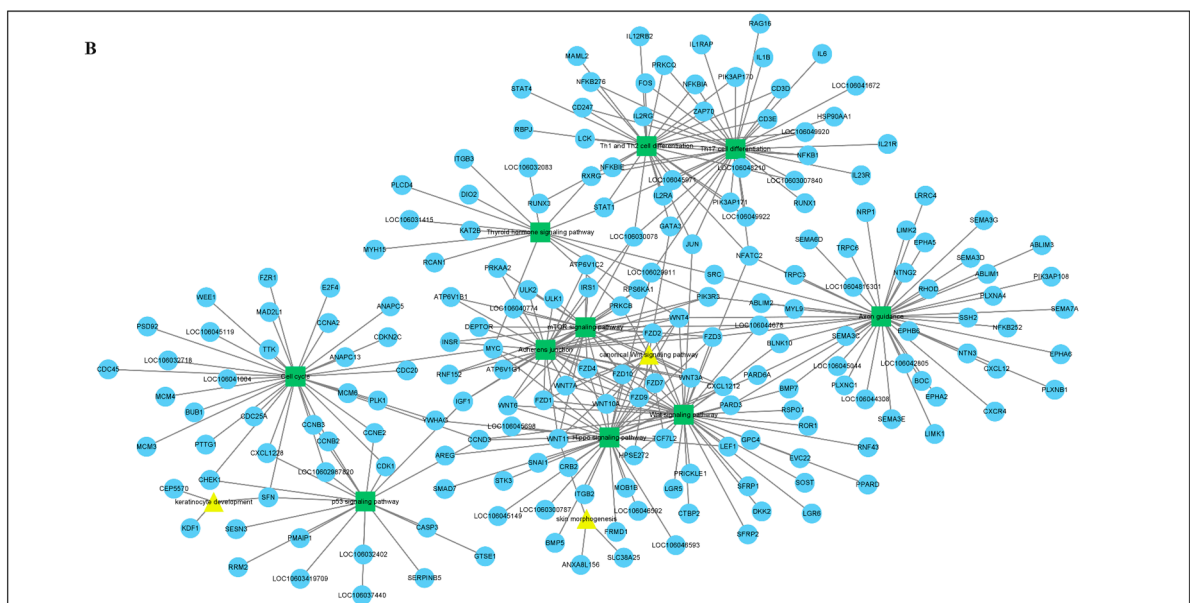

Supplement: s1 [file s1]
