# Supplementary material for: Transcriptome Profiling Unveils Key Genes Regulating the Growth and Development of Yangzhou Goose Knob
Source: Int J Mol Sci. 2024 Apr 10;25(8):4166. doi: 10.3390/ijms25084166 (PMC11050116; doi:10.3390/ijms25084166)
Supplement: Supplementary file 1 [file ijms-25-04166-s001.zip]

Archive with 21 entries (21 files):
- Figure S1.jpg
- Figure S2.jpg
- Figure S3.jpg
- Figure S4.jpg
- Figure S5-A.png
- Figure S5-B.png
- Figure S5-C.png
- Figure S6.jpg
- supplementary figures.pdf
- Table S1.xlsx
- Table S10.xlsx
- Table S11.xlsx
- Table S12.xlsx
- Table S2.xlsx
- Table S3.xlsx
- Table S4.xlsx
- Table S5.xlsx
- Table S6.xlsx
- Table S7.xlsx
- Table S8.xlsx
- Table S9.xlsx
