# Supplementary material for: Transcriptome Profiling Unveils Key Genes Regulating the Growth and Development of Yangzhou Goose Knob
Source: Int J Mol Sci. 2024 Apr 10;25(8):4166. doi: 10.3390/ijms25084166 (PMC11050116; doi:10.3390/ijms25084166)
Supplement: Supplementary file 1 [file ijms-25-04166-s001.zip › Table S1.xlsx]

## Sheet: Sheet1
Table S1 Goose Knob Skin Tissue Quantitative Statistics
	stratum corneum(μm）	stratum spinosum(μm）	stratum epidermis(μm）	stratum reticular(μm）	stratum corium(μm）
D70	22.26	101.63	121.22	69.21	316.75
D120	28.43	97.02	122.36	209.45	377.66
D300	32.04	96.88	176.17	280.29	500.23
