# Supplementary material for: Transcriptome Profiling Unveils Key Genes Regulating the Growth and Development of Yangzhou Goose Knob
Source: Int J Mol Sci. 2024 Apr 10;25(8):4166. doi: 10.3390/ijms25084166 (PMC11050116; doi:10.3390/ijms25084166)
Supplement: Supplementary file 1 [file ijms-25-04166-s001.zip › Table S2.xlsx]

## Sheet: raw  Data
Table S2.Result Statistics of mRNA Genome Quality control
Sample	Raw reads	Raw bases	Clean reads	Clean bases	Error rate(%)	Q20(%)	Q30(%)	GC content(%)
D701	47315024	7144568624	46700610	6951876467	0.0253	97.88	93.94	49.44
D702	50521500	7628746500	49861636	7411171877	0.0254	97.85	93.84	50.21
D703	46969118	7092336818	46407484	6916255840	0.0255	97.8	93.72	49.8
D1201	51406952	7762449752	50740128	7545580890	0.0257	97.73	93.56	49.32
D1202	55743474	8417264574	55092678	8189407574	0.0253	97.85	93.86	50.16
D1203	49130128	7418649328	48490874	7205786905	0.0253	97.87	93.93	50.03
D3001	46543436	7028058836	45991268	6868144600	0.0253	97.86	93.9	50.78
D3002	52495514	7926822614	51921568	7746182492	0.025	97.98	94.16	49.91
D3003	51379352	7758282152	50793616	7494151961	0.0243	98.22	94.89	49.51
