# Supplementary material for: Transcriptome Profiling Unveils Key Genes Regulating the Growth and Development of Yangzhou Goose Knob
Source: Int J Mol Sci. 2024 Apr 10;25(8):4166. doi: 10.3390/ijms25084166 (PMC11050116; doi:10.3390/ijms25084166)
Supplement: Supplementary file 1 [file ijms-25-04166-s001.zip › Table S3.xlsx]

## Sheet: Guide
Table S3. The number of differential genes in each comparison group
Guide
70VS120	Number of differential genes in 70VS120
70VS300	Number of differential genes in 70VS300
120VS300	Number of differential genes in 120VS300

## Sheet: 70VS120
Gene_id	Gene_name	Gene_description	D120_vs_D300	D70_vs_D300	D70_vs_D120	Sum
gene4729	LOC106032884	uncharacterized LOC106032884, transcript variant X3	no|up	yes|up	yes|up	2
gene20306	LOC106049813	cell adhesion molecule 3-like, transcript variant X1	yes|down	yes|down	yes|down	3
gene14638	ERICH3	glutamate-rich 3	yes|up	yes|up	yes|up	3
gene7777	LOC106036118	uncharacterized LOC106036118, transcript variant X1	no|down	yes|down	yes|down	2
gene19337	ETV4	ets variant 4	no|up	yes|down	yes|down	2
gene10247	BAZ1A	bromodomain adjacent to zinc finger domain, 1A	no|down	yes|down	yes|down	2
gene212	ADAM8	ADAM metallopeptidase domain 8	no|up	yes|down	yes|down	2
gene524	FAM53A	family with sequence similarity 53, member A, transcript variant X2	no|down	yes|up	yes|up	2
gene10022	LOC106038521	wiskott-Aldrich syndrome protein family member 3-like	yes|up	yes|up	yes|up	3
gene19513	LOC106048983	serpin B10-like	yes|up	yes|down	yes|down	3
gene13920	CISH	cytokine inducible SH2-containing protein	yes|down	yes|down	yes|down	3
gene5194	HERPUD1	homocysteine-inducible, endoplasmic reticulum stress-inducible, ubiquitin-like domain member 1	no|down	yes|down	yes|down	2
gene16394	EDA2R	ectodysplasin A2 receptor	no|up	yes|down	yes|down	2
gene6563	NAT9	N-acetyltransferase 9 (GCN5-related, putative), transcript variant X1	no|up	yes|up	yes|up	2
gene12747	LOC106041580	regulator of G-protein signaling 1-like	yes|down	yes|down	yes|down	3
gene16176	CREM	cAMP responsive element modulator, transcript variant X1	yes|down	yes|down	yes|down	3
gene16175	LOC106045306	uncharacterized LOC106045306	no|down	yes|down	yes|down	2
gene16174	LOC106045305	uncharacterized LOC106045305, transcript variant X3	no|down	yes|down	yes|down	2
gene16171	FZD8	frizzled class receptor 8	yes|down	no|up	yes|up	2
gene14493	BACH1	BTB and CNC homology 1, basic leucine zipper transcription factor 1	no|up	no|down	yes|down	1
gene6346	FN1	fibronectin 1	yes|up	no|up	yes|down	2
gene3107	LOC106030918	aldose reductase-like	no|up	yes|up	yes|up	2
gene16609	ADORA2B	adenosine A2b receptor	no|down	yes|down	yes|down	2
gene10056	ACSL4	acyl-CoA synthetase long-chain family member 4, transcript variant X1	no|up	yes|down	yes|down	2
gene14604	PDE4B	phosphodiesterase 4B, cAMP-specific	no|up	yes|down	yes|down	2
gene14601	DNAJC6	DnaJ (Hsp40) homolog, subfamily C, member 6, transcript variant X2	no|up	no|down	yes|down	1
gene10385	KLF6	Kruppel-like factor 6, transcript variant X1	no|up	no|down	yes|down	1
gene5464	DCUN1D3	DCN1, defective in cullin neddylation 1, domain containing 3	no|down	yes|down	yes|down	2
gene9351	ADGRG2	adhesion G protein-coupled receptor G2, transcript variant X1	no|up	no|down	yes|down	1
gene8732	NDOR1	NADPH dependent diflavin oxidoreductase 1	yes|down	no|up	yes|up	2
gene19298	EPPK1	epiplakin 1	no|down	yes|down	yes|down	2
gene18075	CNTNAP2	contactin associated protein-like 2	no|up	no|down	yes|down	1
gene7316	GNAI1	guanine nucleotide binding protein (G protein), alpha inhibiting activity polypeptide 1, transcript variant X1	no|down	no|up	yes|up	1
gene2666	LOC106030436	glutathione S-transferase-like, transcript variant X2	no|up	yes|up	yes|up	2
gene19851	CLDN10	claudin 10	no|up	yes|up	yes|up	2
gene12081	EEF1A2	eukaryotic translation elongation factor 1 alpha 2	no|up	no|down	yes|down	1
gene12268	ACVR2A	activin A receptor, type IIA, transcript variant X1	no|up	no|down	yes|down	1
gene1404	CHST1	carbohydrate (keratan sulfate Gal-6) sulfotransferase 1	yes|down	yes|down	yes|down	3
gene1971	LOC106029463	cytochrome P450 1B1	yes|down	no|down	yes|up	2
gene1973	RMDN2	regulator of microtubule dynamics 2, transcript variant X5	no|up	yes|up	yes|up	2
gene20050	LOC106049547	uncharacterized LOC106049547	no|up	yes|down	yes|down	2
gene20501	LOC106029353	induced myeloid leukemia cell differentiation protein Mcl-1 homolog	no|up	yes|down	yes|down	2
gene8697	LOC106037044	glutamine synthetase	no|up	yes|down	yes|down	2
gene230	ASAH2	N-acylsphingosine amidohydrolase (non-lysosomal ceramidase) 2	no|down	yes|down	yes|down	2
gene10624	SLCO2A1	solute carrier organic anion transporter family, member 2A1	no|down	yes|down	yes|down	2
gene5068	LOC106033086	vitamin D3 hydroxylase-associated protein-like	no|up	no|down	yes|down	1
gene945	FILIP1L	filamin A interacting protein 1-like, transcript variant X1	yes|up	no|down	yes|down	2
gene548	TNIP2	TNFAIP3 interacting protein 2	no|down	yes|down	yes|down	2
gene2475	ANKRD28	ankyrin repeat domain 28, transcript variant X1	no|down	yes|down	yes|down	2
gene12890	CD83	CD83 molecule	yes|down	yes|down	yes|down	3
gene13228	CCNB1	cyclin B1	no|up	yes|up	yes|up	2
gene1961	FEZ2	fasciculation and elongation protein zeta 2 (zygin II), transcript variant X1	no|up	no|down	yes|down	1
gene20043	LOC106049538	HEPACAM family member 2-like	yes|down	yes|down	yes|down	3
gene20046	SLC35E4	solute carrier family 35, member E4	no|down	yes|down	yes|down	2
gene8680	TNC	tenascin C, transcript variant X5	no|up	yes|down	yes|down	2
gene8683	LOC106037097	uncharacterized LOC106037097	no|down	yes|down	yes|down	2
gene226	PAPSS2	3'-phosphoadenosine 5'-phosphosulfate synthase 2	no|down	yes|down	yes|down	2
gene10638	NEU4	sialidase 4	no|down	yes|down	yes|down	2
gene19493	LMNA	lamin A/C	no|up	yes|down	yes|down	2
gene9089	SDHAF3	succinate dehydrogenase complex assembly factor 3	no|down	yes|up	yes|up	2
gene11909	ST14	suppression of tumorigenicity 14 (colon carcinoma), transcript variant X1	no|up	yes|down	yes|down	2
gene19011	KCNA2	potassium channel, voltage gated shaker related subfamily A, member 2, transcript variant X2	no|up	yes|up	yes|up	2
gene17501	SLC16A3	solute carrier family 16 (monocarboxylate transporter), member 3, transcript variant X2	no|down	yes|down	yes|down	2
gene9888	GAREM	GRB2 associated, regulator of MAPK1, transcript variant X1	no|up	no|down	yes|down	1
gene1179	LOC106041184	oxidative stress-responsive serine-rich protein 1-like	no|up	no|down	yes|down	1
gene9523	LOC106038087	uncharacterized LOC106038087, transcript variant X2	no|up	no|down	yes|down	1
gene12861	CREG2	cellular repressor of E1A-stimulated genes 2	yes|up	yes|up	yes|up	3
gene15852	LOC106045009	ectoderm-neural cortex protein 1-like	yes|down	yes|down	yes|down	3
gene12288	LOC106041089	C-C motif chemokine 3-like 1	no|down	yes|down	yes|down	2
gene7321	HGF	hepatocyte growth factor (hepapoietin A; scatter factor), transcript variant X1	yes|up	yes|up	yes|down	3
gene6335	LOC106034499	uncharacterized LOC106034499	yes|down	yes|down	yes|down	3
gene15107	CACFD1	calcium channel flower domain containing 1	no|down	yes|up	yes|up	2
gene16632	ATP2B4	ATPase, Ca++ transporting, plasma membrane 4, transcript variant X1	no|up	no|down	yes|down	1
gene16636	PRELP	proline/arginine-rich end leucine-rich repeat protein	no|up	yes|up	yes|up	2
gene16639	BTG2	BTG family, member 2	no|down	yes|down	yes|down	2
gene18834	LOC106048250	membrane-associated phosphatidylinositol transfer protein 1-like	no|up	yes|down	yes|down	2
gene18243	FGF12	fibroblast growth factor 12	no|up	yes|up	yes|up	2
gene8762	DPP7	dipeptidyl-peptidase 7	no|up	yes|up	yes|up	2
gene8763	LOC106037125	kelch-like protein 13	no|up	yes|up	yes|up	2
gene8764	LOC106037110	dual specificity testis-specific protein kinase 2-like, transcript variant X1	yes|up	yes|up	yes|up	3
gene3953	LOC106031833	uncharacterized LOC106031833, transcript variant X2	no|down	yes|down	yes|down	2
gene17377	COL6A6	collagen, type VI, alpha 6, transcript variant X2	yes|down	yes|down	yes|down	3
gene11910	LOC106040586	uncharacterized LOC106040586, transcript variant X3	no|down	yes|down	yes|down	2
gene1226	LOC106041591	uncharacterized LOC106041591, transcript variant X1	no|down	yes|down	yes|down	2
gene1227	NFATC2	nuclear factor of activated T-cells, cytoplasmic, calcineurin-dependent 2, transcript variant X3	no|up	yes|down	yes|down	2
gene19735	LOC106049225	uncharacterized LOC106049225	no|up	yes|down	yes|down	2
gene19739	LOC106049217	scale keratin-like	no|down	yes|down	yes|down	2
gene968	NFKBIZ	nuclear factor of kappa light polypeptide gene enhancer in B-cells inhibitor, zeta, transcript variant X1	no|down	yes|down	yes|down	2
gene18351	GPD1	glycerol-3-phosphate dehydrogenase 1 (soluble)	no|up	yes|up	yes|up	2
gene18607	NT5C3B	5'-nucleotidase, cytosolic IIIB	no|down	no|up	yes|up	1
gene13479	SLCO2B1	solute carrier organic anion transporter family, member 2B1, transcript variant X1	no|up	yes|up	yes|up	2
gene1789	AMIGO2	adhesion molecule with Ig-like domain 2, transcript variant X2	no|up	no|down	yes|down	1
gene12290	LOC106041041	C-C motif chemokine 4 homolog	yes|down	yes|down	yes|down	3
gene12291	LOC106041042	C-C motif chemokine 4-like	no|down	yes|down	yes|down	2
gene15849	ARRDC2	arrestin domain containing 2, transcript variant X2	no|down	yes|down	yes|down	2
gene7318	CD36	CD36 molecule (thrombospondin receptor), transcript variant X6	no|up	yes|up	yes|up	2
gene4448	MFAP3L	microfibrillar-associated protein 3-like, transcript variant X1	no|up	no|down	yes|down	1
gene2146	SLC4A3	solute carrier family 4 (anion exchanger), member 3	no|down	yes|down	yes|down	2
gene14460	LOC106043431	trifunctional purine biosynthetic protein adenosine-3-like, transcript variant X1	yes|down	no|down	yes|up	2
gene15442	ANXA1	annexin A1	yes|up	no|up	yes|down	2
gene16641	LOC106045866	acidic mammalian chitinase-like	no|down	yes|down	yes|down	2
gene16642	LOC106045865	acidic mammalian chitinase-like	no|down	yes|down	yes|down	2
gene11034	LOC106039631	cubilin-like	no|up	yes|down	yes|down	2
gene1942	SRD5A2	steroid-5-alpha-reductase, alpha polypeptide 2 (3-oxo-5 alpha-steroid delta 4-dehydrogenase alpha 2), transcript variant X1	no|down	yes|up	yes|up	2
gene7498	ZBED1	zinc finger, BED-type containing 1	no|down	yes|down	yes|down	2
gene3958	TRIM8	tripartite motif containing 8	no|down	yes|down	yes|down	2
gene11745	KLF4	Kruppel-like factor 4 (gut)	no|up	yes|down	yes|down	2
gene19742	LOC106049222	scale keratin	no|up	no|down	yes|down	1
gene978	CBLB	Cbl proto-oncogene B, E3 ubiquitin protein ligase	no|down	yes|down	yes|down	2
gene18296	CDS2	CDP-diacylglycerol synthase (phosphatidate cytidylyltransferase) 2	yes|up	yes|up	yes|up	3
gene8958	PCDH19	protocadherin 19	no|up	yes|down	yes|down	2
gene572	CPZ	carboxypeptidase Z	no|up	yes|down	yes|down	2
gene576	ACOX3	acyl-CoA oxidase 3, pristanoyl, transcript variant X3	no|up	yes|up	yes|up	2
gene2441	LOC106030229	uncharacterized LOC106030229, transcript variant X1	no|down	no|up	yes|up	1
gene601	EVC2	Ellis van Creveld syndrome 2, transcript variant X1	no|up	yes|up	yes|up	2
gene6535	LOC106034733	nucleoside diphosphate kinase-like, transcript variant X3	no|down	no|up	yes|up	1
gene16124	HSPA12A	heat shock 70kDa protein 12A, transcript variant X1	no|up	yes|up	yes|up	2
gene19817	ABHD12B	abhydrolase domain containing 12B	yes|up	yes|up	yes|up	3
gene12594	ETNK2	ethanolamine kinase 2	no|down	yes|down	yes|down	2
gene12596	DPH1	diphthamide biosynthesis 1	no|down	yes|down	yes|down	2
gene12591	PLEKHA6	pleckstrin homology domain containing, family A member 6	no|down	yes|down	yes|down	2
gene2150	ITGB6	integrin, beta 6, transcript variant X4	no|up	yes|down	yes|down	2
gene17831	KIAA1755	KIAA1755 ortholog	no|down	yes|down	yes|down	2
gene6310	ARL4C	ADP-ribosylation factor-like 4C	no|up	yes|down	yes|down	2
gene16654	MDFI	MyoD family inhibitor	no|up	yes|up	yes|up	2
gene16655	FOXP4	forkhead box P4	yes|up	no|down	yes|down	2
gene15871	KLF2	Kruppel-like factor 2	no|down	yes|down	yes|down	2
gene5780	BDNF	brain-derived neurotrophic factor, transcript variant X1	no|up	no|down	yes|down	1
gene20275	LOC106049783	intercellular adhesion molecule 5-like	no|down	yes|down	yes|down	2
gene20276	S1PR2	sphingosine-1-phosphate receptor 2	no|up	no|down	yes|down	1
gene1932	KIF26B	kinesin family member 26B	no|up	yes|down	yes|down	2
gene5431	LOC106033455	multidrug resistance-associated protein 6-like	no|up	yes|up	yes|up	2
gene7467	NIPA1	non imprinted in Prader-Willi/Angelman syndrome 1	no|up	yes|up	yes|up	2
gene17756	PAK6	p21 protein (Cdc42/Rac)-activated kinase 6, transcript variant X4	yes|down	no|up	yes|up	2
gene17753	LOC106047053	chromosome unknown open reading frame, human C15orf52, transcript variant X2	no|up	yes|up	yes|up	2
gene1204	B4GALT5	UDP-Gal:betaGlcNAc beta 1,4- galactosyltransferase, polypeptide 5	no|down	yes|down	yes|down	2
gene19020	CDKN1A	cyclin-dependent kinase inhibitor 1A (p21, Cip1)	no|down	yes|down	yes|down	2
gene7683	LOC106035954	iroquois-class homeodomain protein irx-2-like	no|down	no|up	yes|up	1
gene9430	MFSD2A	major facilitator superfamily domain containing 2A	yes|down	yes|down	yes|down	3
gene18192	ALKBH8	alkB homolog 8, tRNA methyltransferase, transcript variant X2	no|up	yes|up	yes|up	2
gene16335	NOBOX	NOBOX oogenesis homeobox, transcript variant X1	no|down	yes|down	yes|down	2
gene16336	CD9	CD9 molecule	no|down	yes|down	yes|down	2
gene18617	ZNF385C	zinc finger protein 385C, transcript variant X3	no|up	yes|up	yes|up	2
gene17535	VMP1	vacuole membrane protein 1, transcript variant X3	no|up	no|down	yes|down	1
gene13852	DUSP1	dual specificity phosphatase 1	no|down	yes|down	yes|down	2
gene16484	MATK	megakaryocyte-associated tyrosine kinase, transcript variant X1	yes|down	yes|down	yes|down	3
gene16126	MEGF10	multiple EGF-like-domains 10	yes|up	no|up	yes|down	2
gene10361	DNAJB6	DnaJ (Hsp40) homolog, subfamily B, member 6, transcript variant X2	no|down	yes|down	yes|down	2
gene17820	COMMD7	COMM domain containing 7	no|down	no|up	yes|up	1
gene3789	ZFP36L1	ZFP36 ring finger protein-like 1	no|down	yes|down	yes|down	2
gene4796	TGFBI	transforming growth factor, beta-induced, 68kDa, transcript variant X1	yes|up	no|down	yes|down	2
gene16665	PPFIA4	protein tyrosine phosphatase, receptor type, f polypeptide (PTPRF), interacting protein (liprin), alpha 4	yes|down	no|up	yes|up	2
gene18979	RFX2	regulatory factor X, 2 (influences HLA class II expression)	no|up	yes|down	yes|down	2
gene14227	FBXO41	F-box protein 41, transcript variant X1	no|down	yes|down	yes|down	2
gene18977	ACSBG2	acyl-CoA synthetase bubblegum family member 2, transcript variant X1	no|up	yes|down	yes|down	2
gene20730	LOC106029598	elastin-like	no|up	yes|down	yes|down	2
gene11941	LOC106040568	uncharacterized LOC106040568	no|down	no|up	yes|up	1
gene20137	LOC106049633	C5a anaphylatoxin chemotactic receptor 1-like	no|up	no|up	yes|down	1
gene913	F5	coagulation factor V (proaccelerin, labile factor), transcript variant X1	yes|up	no|down	yes|down	2
gene9444	RNF19B	ring finger protein 19B	no|down	yes|down	yes|down	2
gene9116	LOC106037619	uncharacterized LOC106037619	no|up	no|down	yes|down	1
gene16324	BCAT1	branched chain amino-acid transaminase 1, cytosolic, transcript variant X1	no|down	yes|down	yes|down	2
gene13840	HBEGF	heparin-binding EGF-like growth factor	yes|down	yes|down	yes|down	3
gene18365	ATG101	autophagy related 101	no|down	yes|down	yes|down	2
gene16496	MFSD12	major facilitator superfamily domain containing 12, transcript variant X1	no|down	yes|down	yes|down	2
gene18412	RGS16	regulator of G-protein signaling 16, transcript variant X1	no|down	no|down	yes|down	1
gene2312	RAPH1	Ras association (RalGDS/AF-6) and pleckstrin homology domains 1, transcript variant X1	no|up	no|down	yes|down	1
gene3376	CCDC92	coiled-coil domain containing 92, transcript variant X2	no|up	no|down	yes|down	1
gene1460	TP53I11	tumor protein p53 inducible protein 11	no|down	no|up	yes|up	1
gene16679	NAV1	neuron navigator 1	no|up	no|down	yes|down	1
gene15897	LOC106044932	perilipin-3-like	yes|up	yes|up	yes|up	3
gene4789	CXCL14	chemokine (C-X-C motif) ligand 14	no|down	no|down	yes|down	1
gene15094	RALGDS	ral guanine nucleotide dissociation stimulator, transcript variant X1	yes|up	no|up	yes|down	2
gene20034	LOC106049534	uncharacterized LOC106049534	yes|down	no|down	yes|up	2
gene20740	CLCF1	cardiotrophin-like cytokine factor 1	no|down	yes|down	yes|down	2
gene9323	ASB9	ankyrin repeat and SOCS box containing 9	no|up	yes|up	yes|up	2
gene10317	ANGEL1	angel homolog 1 (Drosophila), transcript variant X1	no|up	yes|up	yes|up	2
gene19223	LOC106048674	prokineticin receptor 2	no|down	yes|down	yes|down	2
gene382	LOC106032017	adipogenesis regulatory factor-like, transcript variant X1	no|up	yes|up	yes|up	2
gene923	LOC106038263	lymphotactin-like	yes|down	yes|down	yes|up	3
gene9101	LOC106037503	neurabin-1-like	no|up	yes|up	yes|up	2
gene9100	PON2	paraoxonase 2	no|up	yes|up	yes|up	2
gene9450	KIAA1522	KIAA1522 ortholog	no|up	yes|down	yes|down	2
gene16862	LOC106046101	uncharacterized LOC106046101, transcript variant X1	no|up	yes|up	yes|up	2
gene18312	P2RY14	purinergic receptor P2Y, G-protein coupled, 14	no|down	no|up	yes|up	1
gene16686	LGR6	leucine-rich repeat containing G protein-coupled receptor 6	yes|up	yes|up	yes|up	3
gene2587	FILIP1	filamin A interacting protein 1, transcript variant X1	yes|up	no|down	yes|down	2
gene6290	LOC106034581	uncharacterized LOC106034581	no|up	yes|up	yes|up	2
gene5824	SPON1	spondin 1, extracellular matrix protein, transcript variant X1	yes|up	no|up	yes|down	2
gene3348	LOC106031415	sarcoplasmic/endoplasmic reticulum calcium ATPase 2	no|down	yes|down	yes|down	2
gene20242	LOC106049758	zinc finger protein RFP-like	no|down	yes|down	yes|down	2
gene7530	HSP90B1	heat shock protein 90kDa beta (Grp94), member 1	no|up	no|down	yes|down	1
gene1904	GREM2	gremlin 2, DAN family BMP antagonist, transcript variant X3	no|up	yes|up	yes|up	2
gene17866	MYOCD	myocardin	no|down	yes|down	yes|down	2
gene1496	CD44	CD44 molecule (Indian blood group)	no|down	yes|down	yes|down	2
gene5579	SEMA6D	sema domain, transmembrane domain (TM), and cytoplasmic domain, (semaphorin) 6D, transcript variant X1	yes|up	yes|up	yes|up	3
gene10307	JDP2	Jun dimerization protein 2	no|up	yes|down	yes|down	2
gene10304	FOS	FBJ murine osteosarcoma viral oncogene homolog	yes|up	yes|down	yes|down	3
gene8620	NCAM2	neural cell adhesion molecule 2, transcript variant X1	no|down	yes|down	yes|down	2
gene5106	PLK3	polo-like kinase 3	no|down	yes|down	yes|down	2
gene17302	PTAFR	platelet-activating factor receptor	no|up	no|down	yes|down	1
gene8141	LOC106036475	uncharacterized LOC106036475, transcript variant X2	no|up	yes|up	yes|up	2
gene17479	GCGR	glucagon receptor	no|down	yes|up	yes|up	2
gene18789	SBNO2	strawberry notch homolog 2 (Drosophila), transcript variant X1	no|down	yes|down	yes|down	2
gene17471	SOCS3	suppressor of cytokine signaling 3	no|down	yes|down	yes|down	2
gene12808	METTL11B	methyltransferase like 11B, transcript variant X4	no|down	no|up	yes|up	1
gene6725	EMILIN2	elastin microfibril interfacer 2, transcript variant X1	yes|up	no|up	yes|down	2
gene6726	LOC106034972	uncharacterized LOC106034972	yes|up	yes|down	yes|down	3
gene18304	SUCNR1	succinate receptor 1	no|up	yes|down	yes|down	2
gene18305	AADAC	arylacetamide deacetylase, transcript variant X1	yes|up	yes|up	yes|up	3
gene2941	ODC1	ornithine decarboxylase 1	no|up	no|down	yes|down	1
gene17700	HSP90AA1	heat shock protein 90kDa alpha (cytosolic), class A member 1	yes|down	yes|down	yes|down	3
gene9718	ADGRF5	adhesion G protein-coupled receptor F5, transcript variant X1	no|down	yes|up	yes|up	2
gene9710	LOC106038153	24-hydroxycholesterol 7-alpha-hydroxylase, transcript variant X2	no|up	yes|up	yes|up	2
gene9711	SLC25A27	solute carrier family 25, member 27	yes|down	no|up	yes|up	2
gene14921	IRG1	immunoresponsive 1 homolog (mouse), transcript variant X1	no|down	yes|down	yes|down	2
gene15435	TMEM2	transmembrane protein 2, transcript variant X1	no|down	yes|down	yes|down	2
gene16692	LOC106045913	C-X-C chemokine receptor type 2-like	no|down	yes|down	yes|down	2
gene6281	AFAP1L1	actin filament associated protein 1-like 1, transcript variant X1	no|down	no|up	yes|up	1
gene18252	IL1RAP	interleukin 1 receptor accessory protein, transcript variant X7	no|up	yes|down	yes|down	2
gene10335	ISM2	isthmin 2, transcript variant X1	no|down	no|up	yes|up	1
gene10846	LOC106039426	lipid phosphate phosphatase-related protein type 5	yes|up	yes|up	yes|up	3
gene10595	EHHADH	enoyl-CoA, hydratase/3-hydroxyacyl CoA dehydrogenase, transcript variant X3	yes|up	yes|up	yes|up	3
gene10594	LOC106039209	chromosome unknown open reading frame, human C3orf70, transcript variant X3	no|up	yes|up	yes|up	2
gene10590	PPP2R3A	protein phosphatase 2, regulatory subunit B'', alpha, transcript variant X2	no|up	no|down	yes|down	1
gene17469	DNAH17	dynein, axonemal, heavy chain 17	yes|down	yes|down	yes|down	3
gene12814	LOC106041602	E-selectin-like, transcript variant X1	no|down	yes|down	yes|down	2
gene12815	RXRG	retinoid X receptor, gamma, transcript variant X1	no|up	yes|up	yes|up	2
gene6732	TGIF1	TGFB-induced factor homeobox 1, transcript variant X1	no|up	no|down	yes|down	1
gene6453	SLC16A6	solute carrier family 16, member 6	no|down	yes|down	yes|down	2
gene9704	CLIC5	chloride intracellular channel 5, transcript variant X1	no|up	yes|up	yes|up	2
gene3437	LOC106031234	uncharacterized LOC106031234	no|down	yes|down	yes|down	2
gene1493	PAMR1	peptidase domain containing associated with muscle regeneration 1, transcript variant X1	yes|up	no|down	yes|down	2
gene1497	LOC106044451	uncharacterized LOC106044451, transcript variant X1	yes|down	yes|down	yes|down	3
gene4609	REV3L	REV3-like, polymerase (DNA directed), zeta, catalytic subunit	no|up	no|down	yes|down	1
gene4607	LOC106032579	uncharacterized LOC106032579	yes|up	no|down	yes|down	2
gene4606	TRAF3IP2	TRAF3 interacting protein 2, transcript variant X1	yes|up	no|down	yes|down	2
gene20591	LOC106029448	melanoma-associated antigen G1-like	no|down	no|up	yes|up	1
gene20599	LOC106029457	interferon-induced guanylate-binding protein 1-like	yes|down	yes|down	yes|down	3
gene15359	FGFR1	fibroblast growth factor receptor 1	yes|up	no|down	yes|down	2
gene17723	LOC106047082	ras-related and estrogen-regulated growth inhibitor-like	yes|down	yes|down	yes|down	3
gene10326	NGB	neuroglobin	no|up	yes|up	yes|up	2
gene11981	PHF19	PHD finger protein 19	no|down	yes|down	yes|down	2
gene8861	LOC106037166	chromosome unknown open reading frame, human C14orf180	no|up	yes|up	yes|up	2
gene18144	ASB12	ankyrin repeat and SOCS box containing 12	no|down	yes|down	yes|down	2
gene17105	SLA	Src-like-adaptor	yes|down	yes|down	yes|down	3
gene888	KIAA1407	KIAA1407 ortholog	no|up	yes|up	yes|up	2
gene10119	UGT8	UDP glycosyltransferase 8, transcript variant X1	no|down	yes|down	yes|down	2
gene13809	VCAN	versican	no|up	no|down	yes|down	1
gene13800	TRPS1	trichorhinophalangeal syndrome I, transcript variant X1	no|up	no|down	yes|down	1
gene18323	TSC22D2	TSC22 domain family, member 2, transcript variant X1	no|up	no|down	yes|down	1
gene405	FAM213A	family with sequence similarity 213, member A, transcript variant X1	no|up	yes|up	yes|up	2
gene3860	COCH	cochlin	yes|up	no|up	yes|down	2
gene1718	CPM	carboxypeptidase M	yes|up	no|down	yes|down	2
gene5831	LOC106033848	NADH-cytochrome b5 reductase 2	no|up	yes|up	yes|up	2
gene17850	MMP9	matrix metallopeptidase 9	yes|down	yes|down	yes|down	3
gene19111	DNAJB5	DnaJ (Hsp40) homolog, subfamily B, member 5, transcript variant X1	no|down	yes|down	yes|down	2
gene12170	SCUBE2	signal peptide, CUB domain, EGF-like 2, transcript variant X1	no|down	yes|down	yes|down	2
gene16188	NFKB1	nuclear factor of kappa light polypeptide gene enhancer in B-cells 1	no|down	yes|down	yes|down	2
gene18849	LOC106048249	olfactory receptor-like protein COR4, transcript variant X1	no|down	yes|down	yes|down	2
gene3089	LMO3	LIM domain only 3 (rhombotin-like 2), transcript variant X1	yes|up	yes|up	yes|up	3
gene20213	IL1B	interleukin 1, beta	no|down	yes|down	yes|down	2
gene20219	LOC106049723	uncharacterized LOC106049723	yes|down	no|down	yes|up	2
gene13212	WNT2	wingless-type MMTV integration site family member 2	no|up	yes|down	yes|down	2
gene6151	SYNJ2	synaptojanin 2, transcript variant X1	yes|up	no|down	yes|down	2
gene14760	SLCO4C1	solute carrier organic anion transporter family, member 4C1	no|down	yes|down	yes|down	2
gene7400	ZSWIM6	zinc finger, SWIM-type containing 6	no|down	yes|down	yes|down	2
gene2927	IAH1	isoamyl acetate-hydrolyzing esterase 1 homolog, transcript variant X1	no|down	no|up	yes|up	1
gene18929	PLIN2	perilipin 2, transcript variant X1	no|up	yes|down	yes|down	2
gene11623	LOC106040258	vesicle-associated membrane protein 2-like	yes|up	no|up	yes|down	2
gene4014	DUSP5	dual specificity phosphatase 5	yes|down	yes|down	yes|down	3
gene14015	MAP1B	microtubule-associated protein 1B	yes|up	no|down	yes|down	2
gene9510	LOC106037932	uncharacterized LOC106037932	no|down	yes|down	yes|down	2
gene5152	LOC106033289	uncharacterized LOC106033289	no|up	yes|down	yes|down	2
gene5153	TPPP3	tubulin polymerization-promoting protein family member 3	no|up	yes|down	yes|down	2
gene5150	KCTD19	potassium channel tetramerization domain containing 19	no|down	yes|down	yes|down	2
gene5151	LRRC36	leucine rich repeat containing 36, transcript variant X1	no|up	yes|down	yes|down	2
gene10861	SLC44A3	solute carrier family 44, member 3	no|up	yes|up	yes|up	2
gene12857	LOC106041672	interleukin-1 receptor type 1-like, transcript variant X1	no|up	yes|down	yes|down	2
gene8494	CSRNP1	cysteine-serine-rich nuclear protein 1	no|down	yes|down	yes|down	2
gene18680	LOC106048089	solute carrier family 2, facilitated glucose transporter member 3, transcript variant X1	no|up	no|down	yes|down	1
gene17596	LOC106046904	acid-sensing ion channel 2-like	no|down	no|up	yes|up	1
gene471	LOC106033192	neurotrypsin-like, transcript variant X2	no|down	yes|down	yes|down	2
gene19301	PLEC	plectin	yes|up	no|down	yes|down	2
gene6436	SOX9	SRY (sex determining region Y)-box 9	no|down	yes|down	yes|down	2
gene6432	SSTR2	somatostatin receptor 2	yes|up	yes|up	yes|up	3
gene7391	PDE4D	phosphodiesterase 4D, cAMP-specific, transcript variant X1	no|up	no|down	yes|down	1
gene15999	SEMA4D	sema domain, immunoglobulin domain (Ig), transmembrane domain (TM) and short cytoplasmic domain, (semaphorin) 4D, transcript variant X4	no|down	no|up	yes|up	1
gene12161	LOC106040894	uncharacterized LOC106040894	yes|down	yes|down	yes|down	3
gene12162	ADM	adrenomedullin	no|up	yes|down	yes|down	2
gene1520	ANO1	anoctamin 1, calcium activated chloride channel, transcript variant X2	no|down	yes|down	yes|down	2
gene5716	DNAJA4	DnaJ (Hsp40) homolog, subfamily A, member 4	yes|down	yes|down	yes|down	3
gene5711	DAPK2	death-associated protein kinase 2	no|up	yes|up	yes|up	2
gene14572	PTX3	pentraxin 3, long	no|down	yes|down	yes|down	2
gene16712	LOC106045912	cytochrome P450 27C1	yes|up	no|down	yes|down	2
gene7411	RNF180	ring finger protein 180, transcript variant X1	no|up	yes|up	yes|up	2
gene7410	HTR1A	5-hydroxytryptamine (serotonin) receptor 1A, G protein-coupled	no|down	yes|down	yes|down	2
gene5536	MAFK	v-maf avian musculoaponeurotic fibrosarcoma oncogene homolog K	no|up	no|down	yes|down	1
gene14391	LOC106043342	transmembrane protein 2-like	no|up	yes|down	yes|down	2
gene14392	CEMIP	cell migration inducing protein, hyaluronan binding	no|down	yes|down	yes|down	2
gene17435	LOC106046705	uncharacterized LOC106046705, transcript variant X2	no|down	yes|down	yes|down	2
gene9821	NFATC1	nuclear factor of activated T-cells, cytoplasmic, calcineurin-dependent 1, transcript variant X1	yes|up	no|down	yes|down	2
gene2730	FSBP	fibrinogen silencer binding protein	no|up	yes|up	yes|up	2
gene6427	CDC42EP4	CDC42 effector protein (Rho GTPase binding) 4	no|up	yes|down	yes|down	2
gene15614	LOC106044678	ras-like GTP-binding protein rhoA, transcript variant X1	no|up	yes|down	yes|down	2
gene16522	DOT1L	DOT1-like histone H3K79 methyltransferase	no|up	yes|down	yes|down	2
gene16525	AMH	anti-Mullerian hormone	no|up	no|down	yes|down	1
gene17581	TNFAIP6	tumor necrosis factor, alpha-induced protein 6, transcript variant X1	no|up	yes|down	yes|down	2
gene14962	MOB1B	MOB kinase activator 1B, transcript variant X1	no|down	yes|down	yes|down	2
gene14705	ARRDC3	arrestin domain containing 3, transcript variant X1	no|up	no|down	yes|down	1
gene20633	LOC106029495	mucin-3B-like	no|down	yes|down	yes|down	2
gene7603	MPST	mercaptopyruvate sulfurtransferase	no|up	yes|up	yes|up	2
gene7604	KCTD17	potassium channel tetramerization domain containing 17, transcript variant X1	no|down	yes|up	yes|up	2
gene8127	RGMA	repulsive guidance molecule family member a	no|down	no|up	yes|up	1
gene10732	THSD7B	thrombospondin, type I, domain containing 7B, transcript variant X1	no|down	yes|down	yes|down	2
gene6777	SLMO1	slowmo homolog 1 (Drosophila), transcript variant X1	no|down	yes|down	yes|down	2
gene6775	TUBB6	tubulin, beta 6 class V	no|up	yes|down	yes|down	2
gene4803	KLHL3	kelch-like family member 3	no|down	yes|up	yes|up	2
gene9522	CSF3R	colony stimulating factor 3 receptor (granulocyte)	no|up	yes|down	yes|down	2
gene8833	HSPA2	heat shock 70kDa protein 2	no|down	yes|down	yes|down	2
gene8347	IRAK2	interleukin-1 receptor-associated kinase 2	no|up	yes|down	yes|down	2
gene13109	FAM102B	family with sequence similarity 102, member B, transcript variant X1	no|up	yes|down	yes|down	2
gene13108	SLC25A24	solute carrier family 25 (mitochondrial carrier; phosphate carrier), member 24	no|up	yes|down	yes|down	2
gene13729	DUSP8	dual specificity phosphatase 8, transcript variant X1	yes|up	no|down	yes|down	2
gene2074	LOC106029795	uncharacterized LOC106029795, transcript variant X1	yes|down	no|down	yes|up	2
gene1504	CAT	catalase	yes|up	yes|up	yes|up	3
gene15394	LZTS1	leucine zipper, putative tumor suppressor 1	no|up	no|down	yes|down	1
gene20084	COL2A1	collagen, type II, alpha 1	no|down	yes|down	yes|down	2
gene20082	VDR	vitamin D (1,25- dihydroxyvitamin D3) receptor	no|down	yes|down	yes|down	2
gene3291	TMEM116	transmembrane protein 116	no|up	yes|up	yes|up	2
gene4021	ADRA2A	adrenoceptor alpha 2A	no|down	yes|down	yes|down	2
gene11812	PIM3	Pim-3 proto-oncogene, serine/threonine kinase	no|up	yes|down	yes|down	2
gene19456	FLNC	filamin C, gamma	no|up	yes|down	yes|down	2
gene19453	GCK	glucokinase (hexokinase 4)	no|down	yes|down	yes|down	2
gene9991	DEPTOR	DEP domain containing MTOR-interacting protein	no|up	yes|up	yes|up	2
gene4565	TNFAIP3	tumor necrosis factor, alpha-induced protein 3, transcript variant X1	no|down	yes|down	yes|down	2
gene9519	STK40	serine/threonine kinase 40	no|down	yes|down	yes|down	2
gene9774	KIAA1644	KIAA1644 ortholog, transcript variant X7	no|up	yes|up	yes|up	2
gene16946	LOC106046136	serine/threonine-protein kinase pim-1-like	yes|down	yes|down	yes|down	3
gene17415	NDEL1	nudE neurodevelopment protein 1-like 1, transcript variant X1	no|up	no|down	yes|down	1
gene18620	LOC106048003	heat shock protein beta-11-like	no|down	yes|down	yes|down	2
gene18496	SCNN1A	sodium channel, non voltage gated 1 alpha subunit	no|up	yes|up	yes|up	2
gene12197	SRC	SRC proto-oncogene, non-receptor tyrosine kinase	no|up	yes|down	yes|down	2
gene5871	ELOVL1	ELOVL fatty acid elongase 1	no|up	yes|down	yes|down	2
gene7584	HMOX1	heme oxygenase 1	no|down	yes|down	yes|down	2
gene16763	ITGB3	integrin, beta 3 (platelet glycoprotein IIIa, antigen CD61), transcript variant X1	no|down	yes|down	yes|down	2
gene14948	STBD1	starch binding domain 1	yes|up	no|down	yes|down	2
gene15493	DIO2	deiodinase, iodothyronine, type II, transcript variant X1	no|up	yes|down	yes|down	2
gene4580	CITED2	Cbp/p300-interacting transactivator, with Glu/Asp-rich carboxy-terminal domain, 2	yes|up	yes|up	yes|up	3
gene5508	NPTX2	neuronal pentraxin II	no|up	yes|up	yes|up	2
gene5505	BAIAP2L1	BAI1-associated protein 2-like 1	yes|up	yes|up	yes|up	3
gene6974	PDLIM3	PDZ and LIM domain 3, transcript variant X2	no|down	yes|down	yes|down	2
gene14051	LOC106042984	G-protein coupled receptor 183-B-like	no|down	yes|down	yes|down	2
gene10823	LOC106039415	uncharacterized oxidoreductase ZK1290.5-like, transcript variant X1	no|up	yes|up	yes|up	2
gene10286	SYNDIG1L	synapse differentiation inducing 1-like, transcript variant X1	no|up	yes|down	yes|down	2
gene11803	MOV10L1	Mov10 RISC complex RNA helicase like 1, transcript variant X1	no|down	no|up	yes|up	1
gene10754	LYPD1	LY6/PLAUR domain containing 1	no|down	yes|up	yes|up	2
gene10750	NCKAP5	NCK-associated protein 5, transcript variant X4	yes|up	yes|up	yes|up	3
gene6753	MTCL1	microtubule crosslinking factor 1	no|down	yes|down	yes|down	2
gene4826	GFPT2	glutamine-fructose-6-phosphate transaminase 2, transcript variant X1	no|up	yes|down	yes|down	2
gene16979	PROSER2	proline and serine rich 2	no|up	yes|down	yes|down	2
gene13258	F2R	coagulation factor II (thrombin) receptor, transcript variant X1	no|down	yes|down	yes|down	2
gene12651	RASL10B	RAS-like, family 10, member B	no|up	yes|up	yes|up	2
gene16576	FAM101B	family with sequence similarity 101, member B	no|up	yes|up	yes|up	2
gene16575	RPH3AL	rabphilin 3A-like (without C2 domains), transcript variant X5	no|down	no|up	yes|up	1
gene13386	THBD	thrombomodulin	no|down	yes|down	yes|down	2
gene12470	HPGDS	hematopoietic prostaglandin D synthase	no|down	yes|down	yes|down	2
gene7029	SDC2	syndecan 2	no|up	no|down	yes|down	1
gene2053	FOSL2	FOS-like antigen 2	no|down	yes|down	yes|down	2
gene15002	LOC106044052	chromosome unknown open reading frame, human C14orf37	no|down	yes|down	yes|down	2
gene16022	LOC106045127	DNA-binding protein inhibitor ID-3-A-like	no|down	no|up	yes|up	1
gene12380	ALOX5AP	arachidonate 5-lipoxygenase-activating protein	no|down	yes|down	yes|down	2
gene12381	HSPH1	heat shock 105kDa/110kDa protein 1	yes|down	yes|down	yes|down	3
gene6037	ENDOD1	endonuclease domain containing 1	no|down	yes|down	yes|down	2
gene20429	IL4I1	interleukin 4 induced 1	no|down	yes|down	yes|down	2
gene4102	PLD1	phospholipase D1, phosphatidylcholine-specific, transcript variant X5	no|up	no|down	yes|down	1
gene14061	LOC106043001	uncharacterized LOC106043001, transcript variant X2	no|down	yes|down	yes|down	2
gene14060	FAM46D	family with sequence similarity 46, member D, transcript variant X1	no|down	yes|down	yes|down	2
gene14066	LOC106042945	uncharacterized protein CXorf21-like, transcript variant X1	no|down	yes|down	yes|down	2
gene11127	LOC106039711	histone-lysine N-methyltransferase 2D-like	no|up	yes|down	yes|down	2
gene11126	OAF	out at first homolog	no|up	yes|down	yes|down	2
gene19384	ADAM28	ADAM metallopeptidase domain 28, transcript variant X1	no|up	yes|down	yes|down	2
gene19382	STC1	stanniocalcin 1, transcript variant X1	no|up	no|down	yes|down	1
gene11832	ANOS1	anosmin 1, transcript variant X1	yes|up	yes|up	yes|up	3
gene19389	NEFL	neurofilament, light polypeptide	no|down	yes|up	yes|up	2
gene826	KCNK10	potassium channel, two pore domain subfamily K, member 10	no|down	yes|down	yes|down	2
gene18389	SNTA1	syntrophin, alpha 1	no|down	no|up	yes|up	1
gene4859	MYOZ3	myozenin 3	no|down	yes|down	yes|down	2
gene11625	LOC106040256	uncharacterized LOC106040256	no|down	yes|down	yes|down	2
gene1827	LOC106047885	arg8-vasotocin receptor-like	no|down	yes|down	yes|down	2
gene9797	LOC106038235	uncharacterized LOC106038235, transcript variant X4	no|up	yes|up	yes|up	2
gene17168	MCF2L	MCF.2 cell line derived transforming sequence-like, transcript variant X1	no|up	yes|up	yes|up	2
gene12661	HSPB1	heat shock 27kDa protein 1	no|up	no|down	yes|down	1
gene13710	TSPAN32	tetraspanin 32, transcript variant X1	no|up	yes|down	yes|down	2
gene16569	PPM1E	protein phosphatase, Mg2+/Mn2+ dependent, 1E, transcript variant X5	no|up	yes|down	yes|down	2
gene13393	FBLN7	fibulin 7	no|up	no|down	yes|down	1
gene5098	ZSWIM5	zinc finger, SWIM-type containing 5, transcript variant X1	no|down	yes|down	yes|down	2
gene1089	VGLL3	vestigial-like family member 3, transcript variant X1	no|up	yes|down	yes|down	2
gene2049	TRNASTOP-UCA	tRNA-Tyr	no|down	yes|down	yes|down	2
gene2048	LOC106029772	uncharacterized LOC106029772	no|up	yes|down	yes|down	2
gene5896	GIPC2	GIPC PDZ domain containing family, member 2, transcript variant X1	no|up	yes|down	yes|down	2
gene5895	DNAJB4	DnaJ (Hsp40) homolog, subfamily B, member 4, transcript variant X2	no|down	yes|down	yes|down	2
gene4693	EGR1	early growth response 1	no|down	yes|down	yes|down	2
gene15034	SAMD4A	sterile alpha motif domain containing 4A, transcript variant X1	no|up	yes|down	yes|down	2
gene15033	GCH1	GTP cyclohydrolase 1	yes|down	yes|down	yes|down	3
gene6029	CCDC82	coiled-coil domain containing 82	no|up	yes|up	yes|up	2
gene6023	ARHGAP42	Rho GTPase activating protein 42	no|up	no|down	yes|down	1
gene20455	LOC106029317	mas-related G-protein coupled receptor member A2-like, transcript variant X1	no|down	yes|down	yes|down	2
gene20457	LOC106029319	proto-oncogene Mas-like	no|down	yes|down	yes|down	2
gene20451	RHOD	ras homolog family member D	no|down	yes|down	yes|down	2
gene20453	LOC106049954	mas-related G-protein coupled receptor member H-like, transcript variant X1	no|up	yes|down	yes|down	2
gene11820	ALG12	ALG12, alpha-1,6-mannosyltransferase	no|up	no|down	yes|down	1
gene132	CXCL12	chemokine (C-X-C motif) ligand 12	no|up	yes|up	yes|up	2
gene5308	LOC106033162	proteoglycan 4-like	no|down	no|up	yes|up	1
gene8380	BHLHE40	basic helix-loop-helix family, member e40	yes|up	no|down	yes|down	2
gene19468	TMEM40	transmembrane protein 40, transcript variant X1	no|down	yes|down	yes|down	2
gene764	PPP4R4	protein phosphatase 4, regulatory subunit 4	no|up	yes|up	yes|up	2
gene8786	RTN1	reticulon 1, transcript variant X1	no|up	yes|up	yes|up	2
gene760	LOC106036374	alpha-1-antitrypsin-like, transcript variant X2	no|down	yes|up	yes|up	2
gene10996	MYLK3	myosin light chain kinase 3, transcript variant X6	yes|down	yes|down	yes|down	3
gene3818	THBS1	thrombospondin 1	yes|up	no|down	yes|down	2
gene14442	RCAN1	regulator of calcineurin 1, transcript variant X1	yes|down	yes|down	yes|down	3
gene17170	F10	coagulation factor X	yes|down	yes|down	yes|down	3
gene19641	LOC106049124	protein MRP-126	no|up	no|down	yes|down	1
gene17205	LOC106046470	ATPase family AAA domain-containing protein 2-like, transcript variant X1	no|up	yes|up	yes|up	2
gene2031	KCNK5	potassium channel, two pore domain subfamily K, member 5	no|down	yes|down	yes|down	2
gene12056	TNFRSF6B	tumor necrosis factor receptor superfamily, member 6b, decoy	no|down	yes|down	yes|down	2
gene8173	PLEKHO2	pleckstrin homology domain containing, family O member 2	no|up	no|down	yes|down	1
gene11109	HSPA8	heat shock 70kDa protein 8	yes|down	yes|down	yes|down	3
gene9954	NSMCE2	non-SMC element 2, MMS21 homolog (S. cerevisiae)	no|down	yes|down	yes|down	2
gene9953	TRIB1	tribbles pseudokinase 1	no|up	yes|down	yes|down	2
gene9951	FAM84B	family with sequence similarity 84, member B	no|down	no|up	yes|up	1
gene13882	DUSP7	dual specificity phosphatase 7	yes|down	yes|down	yes|down	3
gene9224	PASD1	PAS domain containing 1, transcript variant X2	no|down	yes|down	yes|down	2
gene10505	CHD7	chromodomain helicase DNA binding protein 7	no|down	yes|down	yes|down	2
gene13263	NYX	nyctalopin, transcript variant X2	no|down	yes|down	yes|down	2
gene13265	DDX3X	DEAD (Asp-Glu-Ala-Asp) box helicase 3, X-linked	no|down	yes|down	yes|down	2
gene591	LOC106035038	uncharacterized LOC106035038, transcript variant X1	yes|down	yes|down	yes|down	3
gene7019	LOC106035226	uncharacterized LOC106035226	yes|down	no|down	yes|up	2
gene12027	HSPA5	heat shock 70kDa protein 5 (glucose-regulated protein, 78kDa)	no|down	yes|down	yes|down	2
gene13512	DGAT2	diacylglycerol O-acyltransferase 2	no|down	yes|up	yes|up	2
gene13515	WNT11	wingless-type MMTV integration site family, member 11	yes|up	yes|up	yes|up	3
gene8116	AKAP13	A kinase (PRKA) anchor protein 13	no|up	no|down	yes|down	1
gene7275	LOC106035469	uncharacterized LOC106035469	no|down	yes|down	yes|down	2
gene6007	LOC106034136	stromelysin-1-like	yes|up	no|up	yes|down	2
gene6009	LOC106034204	interstitial collagenase-like	yes|up	no|down	yes|down	2
gene3205	RAB19	RAB19, member RAS oncogene family	no|down	yes|down	yes|down	2
gene2831	PI15	peptidase inhibitor 15	no|down	yes|down	yes|down	2
gene14895	NR4A2	nuclear receptor subfamily 4, group A, member 2	no|up	yes|down	yes|down	2
gene15274	SLC2A5	solute carrier family 2 (facilitated glucose/fructose transporter), member 5, transcript variant X2	no|down	yes|up	yes|up	2
gene15278	SPSB1	splA/ryanodine receptor domain and SOCS box containing 1	no|up	yes|down	yes|down	2
gene11111	CRTAM	cytotoxic and regulatory T cell molecule, transcript variant X1	yes|down	no|down	yes|up	2
gene1334	NUMB	numb homolog (Drosophila), transcript variant X1	no|up	no|down	yes|down	1
gene19388	NEFM	neurofilament, medium polypeptide	no|down	yes|up	yes|up	2
gene9236	MAMLD1	mastermind-like domain containing 1	yes|up	no|down	yes|down	2
gene343	ARID5B	AT rich interactive domain 5B (MRF1-like), transcript variant X1	no|up	yes|down	yes|down	2
gene10570	UGDH	UDP-glucose 6-dehydrogenase	no|down	yes|down	yes|down	2
gene13078	AREG	amphiregulin	yes|down	yes|down	yes|down	3
gene9948	MYC	v-myc avian myelocytomatosis viral oncogene homolog	yes|down	yes|down	yes|down	3
gene3937	ITGBL1	integrin, beta-like 1 (with EGF-like repeat domains)	no|up	no|down	yes|down	1
gene17229	JPH3	junctophilin 3	no|up	yes|up	yes|up	2
gene120	CH25H	cholesterol 25-hydroxylase	no|up	yes|down	yes|down	2
gene13699	PHLDA2	pleckstrin homology-like domain, family A, member 2	yes|down	yes|down	yes|down	3
gene13696	CARS	cysteinyl-tRNA synthetase	no|up	no|down	yes|down	1
gene15045	GNPNAT1	glucosamine-phosphate N-acetyltransferase 1, transcript variant X2	no|down	yes|down	yes|down	2
gene13526	TSKU	tsukushi, small leucine rich proteoglycan	yes|up	no|down	yes|down	2
gene13523	LRRC32	leucine rich repeat containing 32, transcript variant X1	no|up	no|down	yes|down	1
gene12039	ANGPTL2	angiopoietin-like 2	no|up	no|down	yes|down	1
gene18995	CSF1	colony stimulating factor 1 (macrophage)	no|up	no|down	yes|down	1
gene18999	SLC6A17	solute carrier family 6 (neutral amino acid transporter), member 17	yes|up	no|down	yes|down	2
gene15096	CCDC180	coiled-coil domain containing 180, transcript variant X1	no|up	no|down	yes|down	1
gene11164	DIXDC1	DIX domain containing 1, transcript variant X1	no|up	yes|up	yes|up	2
gene11163	LOC106039720	chromosome unknown open reading frame, human C11orf52	no|up	yes|up	yes|up	2
gene9082	COL28A1	collagen, type XXVIII, alpha 1	no|up	no|down	yes|down	1
gene1856	NTPCR	nucleoside-triphosphatase, cancer-related	no|up	yes|up	yes|up	2
gene1854	MAP10	microtubule-associated protein 10	no|up	yes|up	yes|up	2
gene20646	LOC106029507	proto-oncogene c-Fos-like, transcript variant X1	no|up	yes|down	yes|down	2
gene10560	KLF3	Kruppel-like factor 3 (basic)	no|up	no|down	yes|down	1
gene17036	MXD1	MAX dimerization protein 1	no|down	yes|down	yes|down	2
gene17780	FN3K	fructosamine 3 kinase, transcript variant X1	yes|up	yes|up	yes|up	3
gene756	GSC	goosecoid homeobox	no|up	yes|up	yes|up	2
gene753	CLMN	calmin (calponin-like, transmembrane)	no|up	no|down	yes|down	1
gene3578	HSPB8	heat shock 22kDa protein 8	no|down	yes|down	yes|down	2
gene16250	NTRK2	neurotrophic tyrosine kinase, receptor, type 2, transcript variant X1	no|up	no|down	yes|down	1
gene1597	EMP1	epithelial membrane protein 1	yes|up	yes|down	yes|down	3
gene13538	LOC106042437	uncharacterized LOC106042437, transcript variant X1	yes|down	yes|down	yes|down	3
gene13539	HSPA4L	heat shock 70kDa protein 4-like, transcript variant X1	no|down	yes|down	yes|down	2
gene18980	LOC106048416	la-related protein 6-like	no|up	no|down	yes|down	1
gene4522	CTGF	connective tissue growth factor	no|up	no|down	yes|down	1
gene62	LOC106037870	adhesion G protein-coupled receptor A3-like	yes|up	yes|up	yes|up	3
gene3208	LOC106031010	uncharacterized LOC106031010, transcript variant X4	no|up	yes|down	yes|down	2
gene3209	KDM7A	lysine (K)-specific demethylase 7A	no|up	yes|down	yes|down	2
gene6068	CHORDC1	cysteine and histidine-rich domain (CHORD) containing 1	yes|down	yes|down	yes|down	3
gene14372	GADL1	glutamate decarboxylase-like 1	no|up	yes|up	yes|up	2
gene6640	JMJD6	jumonji domain containing 6	yes|down	yes|down	yes|down	3
gene17166	LOC106046437	uncharacterized LOC106046437, transcript variant X2	no|down	yes|down	yes|down	2
gene11315	RNF152	ring finger protein 152, transcript variant X7	yes|up	yes|up	yes|up	3
gene14127	BCAR1	breast cancer anti-estrogen resistance 1, transcript variant X1	no|up	no|down	yes|down	1
gene9214	LOC106037776	uncharacterized LOC106037776	no|down	yes|up	yes|up	2
gene10224	LOC106038729	transmembrane protein 110-like	no|up	yes|up	yes|up	2
gene10048	CAPN6	calpain 6, transcript variant X6	no|up	yes|up	yes|up	2
gene19688	SLC46A1	solute carrier family 46 (folate transporter), member 1	no|down	yes|up	yes|up	2
gene9923	LOC106038386	chromosome unknown open reading frame, human C8orf22	yes|up	yes|up	yes|up	3
gene5200	NDRG4	NDRG family member 4, transcript variant X1	no|up	yes|up	yes|up	2
gene12635	LOC106041489	merlin-like, transcript variant X2	no|down	no|up	yes|up	1
gene13237	HOMER1	homer scaffolding protein 1, transcript variant X1	no|up	no|down	yes|down	1
gene15062	ABL1	ABL proto-oncogene 1, non-receptor tyrosine kinase, transcript variant X1	no|up	no|down	yes|down	1
gene12496	RSBN1	round spermatid basic protein 1	no|up	no|down	yes|down	1
gene3742	ATF3	activating transcription factor 3	no|up	yes|down	yes|down	2
gene4534	LOC106032501	vascular non-inflammatory molecule 3-like	no|down	yes|down	yes|down	2
gene18	NPM3	nucleophosmin/nucleoplasmin 3, transcript variant X2	yes|down	yes|down	yes|down	3
gene16443	B3GNT2	UDP-GlcNAc:betaGal beta-1,3-N-acetylglucosaminyltransferase 2, transcript variant X2	no|up	no|down	yes|down	1
gene6057	SMCO4	single-pass membrane protein with coiled-coil domains 4, transcript variant X2	no|down	yes|down	yes|down	2
gene6054	LOC106034174	uncharacterized LOC106034174	yes|down	yes|down	yes|down	3
gene5597	MAPK6	mitogen-activated protein kinase 6	no|down	yes|down	yes|down	2
gene8639	ADAMTS1	ADAM metallopeptidase with thrombospondin type 1 motif, 1	no|down	yes|down	yes|down	2
gene15241	HIVEP2	human immunodeficiency virus type I enhancer binding protein 2, transcript variant X8	no|up	no|down	yes|down	1
gene11543	TNFRSF1B	tumor necrosis factor receptor superfamily, member 1B	yes|down	yes|down	yes|down	3
gene18084	CPEB1	cytoplasmic polyadenylation element binding protein 1, transcript variant X1	no|down	yes|up	yes|up	2
gene4759	FNIP1	folliculin interacting protein 1, transcript variant X1	no|up	no|down	yes|down	1
gene11899	ARHGAP32	Rho GTPase activating protein 32, transcript variant X2	yes|up	yes|up	yes|up	3
gene17017	LOC106046256	uncharacterized LOC106046256	no|down	yes|down	yes|down	2
gene19547	NAB2	NGFI-A binding protein 2 (EGR1 binding protein 2)	yes|down	yes|down	yes|down	3
gene19543	GPR182	G protein-coupled receptor 182	no|up	yes|up	yes|up	2
gene6619	TEN1	TEN1 CST complex subunit, transcript variant X1	no|down	no|up	yes|up	1
gene4298	HHIP	hedgehog interacting protein	no|up	no|down	yes|down	1
gene4965	JUN	jun proto-oncogene	no|up	yes|down	yes|down	2
gene6985	ACSL1	acyl-CoA synthetase long-chain family member 1, transcript variant X1	no|down	yes|up	yes|up	2
gene16054	SERINC2	serine incorporator 2	yes|up	no|up	yes|down	2
gene16053	FABP3	fatty acid binding protein 3, muscle and heart	no|up	yes|up	yes|up	2
gene4502	LOC106032484	protein SOGA3, transcript variant X4	no|up	yes|up	yes|up	2
gene13559	SPRY1	sprouty RTK signaling antagonist 1, transcript variant X3	no|down	yes|down	yes|down	2
gene3518	LRRC75B	leucine rich repeat containing 75B	no|up	yes|up	yes|up	2
gene3517	GGT1	gamma-glutamyltransferase 1, transcript variant X1	no|up	yes|up	yes|up	2
gene4503	LOC106032414	chromosome unknown open reading frame, human C6orf58	no|down	no|down	yes|up	1
gene16452	UGP2	UDP-glucose pyrophosphorylase 2	no|up	yes|down	yes|down	2
gene12200	DBNDD2	dysbindin (dystrobrevin binding protein 1) domain containing 2	yes|up	no|down	yes|down	2
gene12205	SDC4	syndecan 4, transcript variant X1	no|down	yes|down	yes|down	2
gene6869	SLC25A30	solute carrier family 25, member 30, transcript variant X1	no|down	no|up	yes|up	1
gene8506	XYLB	xylulokinase homolog (H. influenzae), transcript variant X1	no|up	yes|up	yes|up	2
gene9275	GABRE	gamma-aminobutyric acid (GABA) A receptor, epsilon, transcript variant X1	no|down	yes|down	yes|down	2
gene11338	NABP1	nucleic acid binding protein 1	yes|down	yes|down	yes|down	3
gene17883	GAS7	growth arrest-specific 7	no|up	no|down	yes|down	1
gene19153	LCA5	Leber congenital amaurosis 5, transcript variant X3	no|up	no|down	yes|down	1
gene9673	PAQR8	progestin and adipoQ receptor family member VIII, transcript variant X5	no|down	yes|down	yes|down	2
gene257	OIT3	oncoprotein induced transcript 3, transcript variant X1	no|up	yes|down	yes|down	2
gene7951	FAM124B	family with sequence similarity 124B, transcript variant X1	yes|down	no|down	yes|up	2
gene7956	SCG2	secretogranin II	no|down	yes|down	yes|down	2
gene4973	PRKAA2	protein kinase, AMP-activated, alpha 2 catalytic subunit, transcript variant X1	no|up	yes|up	yes|up	2
gene1071	CD80	CD80 molecule, transcript variant X1	no|up	yes|down	yes|down	2
gene12788	LOC106041570	uncharacterized LOC106041570	no|down	yes|down	yes|down	2
gene12569	PM20D1	peptidase M20 domain containing 1	yes|up	yes|up	yes|up	3
gene2637	BAG2	BCL2-associated athanogene 2	no|up	yes|up	yes|up	2
gene15511	FRMD1	FERM domain containing 1, transcript variant X1	no|up	yes|up	yes|up	2
gene15519	THBS2	thrombospondin 2, transcript variant X1	yes|up	yes|up	yes|up	3
gene12216	NOCT	nocturnin	yes|down	yes|down	yes|down	3
gene16048	SDC3	syndecan 3	no|up	yes|up	yes|up	2
gene6855	HTR2A	5-hydroxytryptamine (serotonin) receptor 2A, G protein-coupled, transcript variant X2	no|up	yes|down	yes|down	2
gene1814	PRICKLE1	prickle homolog 1, transcript variant X1	no|up	yes|up	yes|up	2
gene8042	RXFP3	relaxin/insulin-like family peptide receptor 3	no|up	yes|up	yes|up	2
gene11525	FHAD1	forkhead-associated (FHA) phosphopeptide binding domain 1, transcript variant X1	no|down	yes|down	yes|down	2
gene2955	TRIB2	tribbles pseudokinase 2	no|down	yes|down	yes|down	2
gene10690	GPC1	glypican 1, transcript variant X1	no|up	yes|up	yes|up	2
gene4361	RBM46	RNA binding motif protein 46, transcript variant X3	no|up	yes|up	yes|up	2
gene4364	NPY2R	neuropeptide Y receptor Y2	no|up	yes|up	yes|up	2
gene10212	LOC106038726	uncharacterized LOC106038726, transcript variant X1	no|up	yes|down	yes|down	2
gene13978	HECW1	HECT, C2 and WW domain containing E3 ubiquitin protein ligase 1	no|up	yes|down	yes|down	2
gene19942	LOC106049430	IgGFc-binding protein-like	yes|up	no|down	yes|down	2
gene5943	CYR61	cysteine-rich, angiogenic inducer, 61	no|up	yes|down	yes|down	2
gene5942	DDAH1	dimethylarginine dimethylaminohydrolase 1, transcript variant X1	yes|up	no|down	yes|down	2
gene3717	LYPLAL1	lysophospholipase-like 1, transcript variant X1	no|up	yes|up	yes|up	2
gene12194	GHRH	growth hormone releasing hormone, transcript variant X3	yes|up	no|up	yes|down	2
gene17929	NCS1	neuronal calcium sensor 1	yes|up	no|down	yes|down	2
gene17928	LOC106047256	hemicentin-2-like	no|up	no|down	yes|down	1
gene17925	ERRFI1	ERBB receptor feedback inhibitor 1, transcript variant X2	no|down	yes|down	yes|down	2
gene3210	LOC106031011	cystine/glutamate transporter-like, transcript variant X2	no|down	yes|down	yes|down	2
gene16689	LOC106045839	receptor-type tyrosine-protein phosphatase V-like	no|down	yes|up	yes|up	2
gene20364	LOC106049872	leukotriene B4 receptor 1-like	no|down	yes|down	yes|down	2
gene7713	NR4A3	nuclear receptor subfamily 4, group A, member 3	no|down	yes|down	yes|down	2
gene8070	LOC106036308	avidin-like	no|down	yes|down	yes|down	2
gene19317	MST1R	macrophage stimulating 1 receptor	no|down	yes|down	yes|down	2
gene6629	SPHK1	sphingosine kinase 1	no|up	no|down	yes|down	1
gene8920	SMAD7	SMAD family member 7	no|up	yes|down	yes|down	2
gene1013	LOC106039346	chromosome unknown open reading frame, human C3orf52, transcript variant X1	no|down	yes|down	yes|down	2
gene9036	SLC7A3	solute carrier family 7 (cationic amino acid transporter, y+ system), member 3	no|down	yes|down	yes|down	2
gene17067	LOC106046287	natural killer cells antigen CD94-like	yes|up	no|up	yes|down	2
gene17060	LOC106046296	C-type lectin domain family 2 member L-like, transcript variant X1	no|down	no|up	yes|up	1
gene12760	UAP1	UDP-N-acetylglucosamine pyrophosphorylase 1	no|down	yes|down	yes|down	2
gene18663	LOC106048033	uncharacterized LOC106048033, transcript variant X1	no|up	yes|up	yes|up	2
gene2802	LOC106030656	fatty acid-binding protein, adipocyte-like	no|up	yes|up	yes|up	2
gene16880	LOC106046116	cadherin EGF LAG seven-pass G-type receptor 2-like	no|down	yes|down	yes|down	2
gene18268	GPR37	G protein-coupled receptor 37 (endothelin receptor type B-like)	no|up	no|down	yes|down	1
gene12509	WNT2B	wingless-type MMTV integration site family, member 2B	yes|up	no|down	yes|down	2
gene20243	LOC106049751	E3 ubiquitin-protein ligase TRIM39-like, transcript variant X1	no|down	yes|down	yes|down	2
gene12185	RIC3	RIC3 acetylcholine receptor chaperone	yes|up	yes|up	yes|up	3
gene6097	ZC3H12D	zinc finger CCCH-type containing 12D	yes|down	yes|down	yes|down	3
gene15289	RBP7	retinol binding protein 7, cellular	no|down	no|up	yes|up	1
gene4714	LOC106032731	uncharacterized LOC106032731, transcript variant X1	no|up	yes|up	yes|up	2
gene15176	LOC106044180	zona pellucida sperm-binding protein 3-like	yes|down	no|down	yes|up	2
gene1388	CHAC1	ChaC glutathione-specific gamma-glutamylcyclotransferase 1	no|up	yes|down	yes|down	2
gene8066	LOC106036393	avidin-like	no|up	yes|down	yes|down	2
gene10674	ARHGEF4	Rho guanine nucleotide exchange factor (GEF) 4, transcript variant X1	no|up	yes|up	yes|up	2
gene10493	FAM110B	family with sequence similarity 110, member B, transcript variant X5	no|up	yes|up	yes|up	2
gene199	LOC106029971	uncharacterized LOC106029971, transcript variant X1	no|up	yes|up	yes|up	2
gene13006	TPPP	tubulin polymerization promoting protein, transcript variant X1	yes|up	no|down	yes|down	2
gene17054	LOC106046289	putative DBH-like monooxygenase protein 2	no|up	yes|down	yes|down	2
gene17059	LOC106046298	C-type lectin domain family 2 member L-like, transcript variant X2	no|down	no|up	yes|up	1
gene19504	LOC106048966	brevican core protein-like	yes|up	yes|up	yes|up	3
gene17540	LOC106046849	uncharacterized LOC106046849, transcript variant X14	no|up	yes|up	yes|up	2
gene3267	ACACB	acetyl-CoA carboxylase beta	no|up	yes|up	yes|up	2
gene3268	UNG	uracil DNA glycosylase	no|down	yes|up	yes|up	2
gene2640	DST	dystonin	no|up	no|down	yes|down	1
gene17947	SH3GLB2	SH3-domain GRB2-like endophilin B2, transcript variant X1	no|up	yes|up	yes|up	2
gene12532	G0S2	G0/G1 switch 2	no|up	yes|up	yes|up	2
gene16094	BAG3	BCL2-associated athanogene 3	yes|down	yes|down	yes|down	3

## Sheet: 70VS300
Gene_id	Gene_name	Gene_description	D120_vs_D300	D70_vs_D300	D70_vs_D120	Sum
gene15549	LOC106044608	uncharacterized LOC106044608	yes|up	yes|up	no|up	2
gene14367	CMTM7	CKLF-like MARVEL transmembrane domain containing 7, transcript variant X1	yes|up	yes|up	no|up	2
gene14815	LOC106043810	uncharacterized LOC106043810	yes|down	yes|down	no|down	2
gene15810	TNFSF13B	tumor necrosis factor (ligand) superfamily, member 13b	yes|down	yes|down	no|down	2
gene15547	LOC106044607	taste receptor type 1 member 3	yes|down	yes|down	no|down	2
gene15544	LOC106044634	lysophosphatidic acid receptor 6-like, transcript variant X3	yes|down	yes|down	no|down	2
gene7368	LOC106035576	granzyme A-like	yes|down	yes|down	no|down	2
gene7363	LOC106035653	chondroitin sulfate proteoglycan 4-like, transcript variant X1	yes|up	yes|up	no|up	2
gene4498	RSPO3	R-spondin 3, transcript variant X1	no|up	yes|up	no|up	1
gene7366	ESM1	endothelial cell-specific molecule 1	no|up	yes|up	no|up	1
gene6379	NCKAP1	NCK-associated protein 1	no|up	yes|up	no|up	1
gene6378	FRZB	frizzled-related protein	no|up	yes|up	no|up	1
gene6373	UNC80	unc-80 homolog (C. elegans)	yes|up	yes|up	no|up	2
gene19648	MVP	major vault protein, transcript variant X1	yes|down	yes|down	no|up	2
gene6377	LOC106034516	uncharacterized LOC106034516	no|up	yes|up	no|up	1
gene6376	LOC106034513	uncharacterized LOC106034513, transcript variant X2	yes|up	yes|up	no|up	2
gene19644	LOR	loricrin	yes|down	yes|down	no|up	2
gene4729	LOC106032884	uncharacterized LOC106032884, transcript variant X3	no|up	yes|up	yes|up	2
gene4723	LOC106032739	uncharacterized LOC106032739, transcript variant X2	no|up	yes|up	no|up	1
gene5639	AQP9	aquaporin 9, transcript variant X1	yes|up	yes|up	no|up	2
gene4724	NR3C1	nuclear receptor subfamily 3, group C, member 1 (glucocorticoid receptor)	no|up	yes|up	no|up	1
gene14495	PTPRT	protein tyrosine phosphatase, receptor type, T, transcript variant X1	yes|up	yes|up	no|up	2
gene20308	LOC106049812	uncharacterized LOC106049812	no|down	yes|down	no|down	1
gene15149	OSTF1	osteoclast stimulating factor 1, transcript variant X1	yes|down	yes|down	no|down	2
gene20307	LOC106049814	uncharacterized LOC106049814, transcript variant X1	no|down	yes|down	no|down	1
gene20306	LOC106049813	cell adhesion molecule 3-like, transcript variant X1	yes|down	yes|down	yes|down	3
gene14638	ERICH3	glutamate-rich 3	yes|up	yes|up	yes|up	3
gene7779	ICOSLG	inducible T-cell co-stimulator ligand	no|down	yes|down	no|down	1
gene8014	LIFR	leukemia inhibitory factor receptor alpha	no|up	yes|up	no|up	1
gene7777	LOC106036118	uncharacterized LOC106036118, transcript variant X1	no|down	yes|down	yes|down	2
gene14141	B3GNT9	UDP-GlcNAc:betaGal beta-1,3-N-acetylglucosaminyltransferase 9, transcript variant X1	yes|up	yes|up	no|down	2
gene18876	CD5	CD5 molecule	yes|down	yes|down	no|up	2
gene18878	ZP1	zona pellucida glycoprotein 1 (sperm receptor)	yes|down	yes|down	no|down	2
gene18879	LOC106048282	acyl-coenzyme A amino acid N-acyltransferase 2-like	no|down	yes|down	no|down	1
gene5947	ODF2L	outer dense fiber of sperm tails 2-like, transcript variant X1	no|down	yes|down	no|down	1
gene11510	RNF186	ring finger protein 186, transcript variant X1	yes|up	yes|up	no|up	2
gene11513	LOC106040243	phospholipase A2, membrane associated-like, transcript variant X1	yes|up	yes|up	no|down	2
gene10640	D2HGDH	D-2-hydroxyglutarate dehydrogenase	no|up	yes|up	no|up	1
gene11263	TENM4	teneurin transmembrane protein 4, transcript variant X4	yes|up	yes|up	no|up	2
gene10399	LOC106039004	uncharacterized LOC106039004	no|down	yes|down	no|down	1
gene10649	KIF1A	kinesin family member 1A	no|down	yes|down	no|down	1
gene10243	LOC106038813	synaptotagmin-5-like	yes|up	yes|up	no|up	2
gene19335	SOST	sclerostin	no|up	yes|up	no|up	1
gene19337	ETV4	ets variant 4	no|up	yes|down	yes|down	2
gene10247	BAZ1A	bromodomain adjacent to zinc finger domain, 1A	no|down	yes|down	yes|down	2
gene19331	LOC106048804	G protein-activated inward rectifier potassium channel 1-like	no|up	yes|up	no|up	1
gene19333	LOC106048786	ras-related protein Rab-18-B-like, transcript variant X1	yes|up	yes|up	no|up	2
gene5452	GPRC5B	G protein-coupled receptor, class C, group 5, member B, transcript variant X1	yes|up	yes|up	no|up	2
gene10249	FAM177A1	family with sequence similarity 177, member A1	yes|up	yes|up	no|down	2
gene19987	LPAR2	lysophosphatidic acid receptor 2, transcript variant X2	no|down	yes|down	no|down	1
gene6174	ARAP3	ArfGAP with RhoGAP domain, ankyrin repeat and PH domain 3, transcript variant X1	no|up	yes|up	no|up	1
gene7367	LOC106035583	granzyme K-like	yes|down	yes|down	no|up	2
gene19193	MAP1A	microtubule-associated protein 1A	no|up	yes|up	no|up	1
gene19195	LOC106048637	creatine kinase U-type, mitochondrial	no|down	yes|down	no|down	1
gene18316	LOC106047700	protein FAM188B2, transcript variant X1	yes|down	yes|down	no|up	2
gene212	ADAM8	ADAM metallopeptidase domain 8	no|up	yes|down	yes|down	2
gene214	ZNF511	zinc finger protein 511	no|up	yes|up	no|up	1
gene218	LOC106030157	lysosomal acid lipase/cholesteryl ester hydrolase-like, transcript variant X1	yes|down	yes|down	no|up	2
gene8234	ROPN1L	rhophilin associated tail protein 1-like, transcript variant X2	no|up	yes|up	no|up	1
gene8232	LOC106036526	carboxymethylenebutenolidase homolog	yes|down	yes|down	no|up	2
gene8728	GRIN1	glutamate receptor, ionotropic, N-methyl D-aspartate 1	yes|down	yes|down	no|up	2
gene8729	LRRC26	leucine rich repeat containing 26	yes|down	yes|down	no|up	2
gene4930	HRH2	histamine receptor H2, transcript variant X1	no|down	yes|down	no|down	1
gene520	UVSSA	UV-stimulated scaffold protein A	no|up	yes|up	no|up	1
gene525	SLBP	stem-loop binding protein	yes|down	yes|down	no|up	2
gene524	FAM53A	family with sequence similarity 53, member A, transcript variant X2	no|down	yes|up	yes|up	2
gene8900	PSTPIP2	proline-serine-threonine phosphatase interacting protein 2	no|down	yes|down	no|down	1
gene1031	NSUN3	NOP2/Sun domain family, member 3, transcript variant X1	no|up	yes|up	no|up	1
gene5049	TRABD2B	TraB domain containing 2B	yes|up	yes|up	no|down	2
gene5042	BEND5	BEN domain containing 5, transcript variant X1	no|up	yes|up	no|up	1
gene17732	LOC106047038	chromosome unknown open reading frame, human C15orf62, transcript variant X2	yes|down	yes|down	no|down	2
gene17731	DNAJC17	DnaJ (Hsp40) homolog, subfamily C, member 17, transcript variant X2	no|up	yes|up	no|up	1
gene19518	MYLK4	myosin light chain kinase family, member 4	no|up	yes|up	no|up	1
gene18062	FHOD3	formin homology 2 domain containing 3, transcript variant X1	yes|up	yes|up	no|down	2
gene10022	LOC106038521	wiskott-Aldrich syndrome protein family member 3-like	yes|up	yes|up	yes|up	3
gene17738	CASC5	cancer susceptibility candidate 5	yes|down	yes|down	no|up	2
gene19517	WRNIP1	Werner helicase interacting protein 1, transcript variant X1	no|up	yes|up	no|up	1
gene19513	LOC106048983	serpin B10-like	yes|up	yes|down	yes|down	3
gene18649	PRCP	prolylcarboxypeptidase (angiotensinase C)	yes|down	yes|down	no|down	2
gene17556	CA4	carbonic anhydrase IV	no|up	yes|up	no|up	1
gene13928	LOC106042805	semaphorin-3B-like	yes|up	yes|up	no|down	2
gene13295	TMEM47	transmembrane protein 47	no|up	yes|up	no|up	1
gene13920	CISH	cytokine inducible SH2-containing protein	yes|down	yes|down	yes|down	3
gene13927	LOC106042804	2'-5'-oligoadenylate synthase-like protein 2	no|down	yes|down	no|down	1
gene13926	LOC106042814	interferon-related developmental regulator 2-like	yes|down	yes|down	no|down	2
gene5198	GFOD2	glucose-fructose oxidoreductase domain containing 2	no|down	yes|down	no|down	1
gene5199	LOC106033201	uncharacterized LOC106033201	no|down	yes|down	no|down	1
gene5196	ENKD1	enkurin domain containing 1, transcript variant X4	yes|up	yes|up	no|up	2
gene5194	HERPUD1	homocysteine-inducible, endoplasmic reticulum stress-inducible, ubiquitin-like domain member 1	no|down	yes|down	yes|down	2
gene5195	PARD6A	par-6 family cell polarity regulator alpha	no|down	yes|down	no|down	1
gene2417	IGF2BP3	insulin-like growth factor 2 mRNA binding protein 3	yes|down	yes|down	no|down	2
gene7174	MDN1	midasin AAA ATPase 1	no|down	yes|down	no|down	1
gene2415	GPNMB	glycoprotein (transmembrane) nmb	yes|down	yes|down	no|up	2
gene16393	AR	androgen receptor	yes|up	yes|up	no|down	2
gene16397	HEPH	hephaestin, transcript variant X1	yes|up	yes|up	no|up	2
gene16394	EDA2R	ectodysplasin A2 receptor	no|up	yes|down	yes|down	2
gene6564	TMEM104	transmembrane protein 104, transcript variant X1	yes|down	yes|down	no|down	2
gene1619	LOC106046243	cytochrome P450 2D20	no|up	yes|up	no|up	1
gene6563	NAT9	N-acetyltransferase 9 (GCN5-related, putative), transcript variant X1	no|up	yes|up	yes|up	2
gene1614	SERHL2	serine hydrolase-like 2, transcript variant X1	no|up	yes|up	no|up	1
gene18354	LIMA1	LIM domain and actin binding 1, transcript variant X1	yes|up	yes|up	no|up	2
gene2096	EAF2	ELL associated factor 2	yes|down	yes|down	no|down	2
gene5990	PTGS2	prostaglandin-endoperoxide synthase 2 (prostaglandin G/H synthase and cyclooxygenase), transcript variant X2	no|down	yes|down	no|down	1
gene2095	IQCB1	IQ motif containing B1	no|up	yes|up	no|up	1
gene12747	LOC106041580	regulator of G-protein signaling 1-like	yes|down	yes|down	yes|down	3
gene4555	MAP7	microtubule-associated protein 7, transcript variant X1	yes|down	yes|down	no|down	2
gene3276	SELPLG	selectin P ligand	yes|down	yes|down	no|down	2
gene7285	CHL1	cell adhesion molecule L1-like, transcript variant X1	yes|down	yes|down	no|down	2
gene3279	FICD	FIC domain containing	no|down	yes|down	no|down	1
gene16176	CREM	cAMP responsive element modulator, transcript variant X1	yes|down	yes|down	yes|down	3
gene16175	LOC106045306	uncharacterized LOC106045306	no|down	yes|down	yes|down	2
gene16174	LOC106045305	uncharacterized LOC106045305, transcript variant X3	no|down	yes|down	yes|down	2
gene16170	LOC106045304	uncharacterized LOC106045304, transcript variant X1	no|up	yes|up	no|up	1
gene17957	ZER1	zyg-11 related, cell cycle regulator	no|up	yes|up	no|up	1
gene17954	ENDOG	endonuclease G	yes|down	yes|down	no|down	2
gene10230	GATA3	GATA binding protein 3, transcript variant X1	yes|down	yes|down	no|up	2
gene20023	SCARA5	scavenger receptor class A, member 5	yes|up	yes|up	no|down	2
gene12528	LOC106041272	chromosome unknown open reading frame, human C1orf74	no|up	yes|up	no|up	1
gene12524	LOC106041346	chromosome unknown open reading frame, human C6orf132	yes|down	yes|down	no|down	2
gene12527	IRF6	interferon regulatory factor 6, transcript variant X1	no|down	yes|down	no|down	1
gene12521	LOC106041380	adenosine receptor A3-like	yes|down	yes|down	no|up	2
gene14824	LOC106043773	chromosome unknown open reading frame, human C17orf78, transcript variant X1	no|up	yes|up	no|up	1
gene15555	TMEM88B	transmembrane protein 88B	no|down	yes|down	no|down	1
gene15801	EFNB2	ephrin-B2	yes|up	yes|up	no|up	2
gene15550	MXRA8	matrix-remodelling associated 8, transcript variant X2	yes|up	yes|up	no|up	2
gene15553	CCNL2	cyclin L2	no|down	yes|down	no|down	1
gene12254	ARHGAP15	Rho GTPase activating protein 15, transcript variant X4	yes|down	yes|down	no|up	2
gene15751	BCL6	B-cell CLL/lymphoma 6	yes|down	yes|down	no|down	2
gene7357	ARL15	ADP-ribosylation factor-like 15, transcript variant X2	no|up	yes|up	no|up	1
gene6349	ABCA12	ATP-binding cassette, sub-family A (ABC1), member 12	yes|down	yes|down	no|down	2
gene6341	LOC106034586	putative methyltransferase DDB_G0268948	no|up	yes|up	no|up	1
gene3103	LOC106030914	aldo-keto reductase family 1 member B10-like	yes|up	yes|up	no|up	2
gene4734	HSPA4	heat shock 70kDa protein 4	no|down	yes|down	no|down	1
gene3107	LOC106030918	aldose reductase-like	no|up	yes|up	yes|up	2
gene16609	ADORA2B	adenosine A2b receptor	no|down	yes|down	yes|down	2
gene19549	LRP1	low density lipoprotein receptor-related protein 1	yes|up	yes|up	no|down	2
gene20318	R3HDM2	R3H domain containing 2	no|down	yes|down	no|down	1
gene16602	GSG2	germ cell associated 2 (haspin)	yes|down	yes|down	no|up	2
gene10052	TMEM164	transmembrane protein 164, transcript variant X1	yes|down	yes|down	no|down	2
gene10053	AMMECR1	Alport syndrome, mental retardation, midface hypoplasia and elliptocytosis chromosomal region gene 1	no|down	yes|down	no|down	1
gene20533	LOC106029389	uncharacterized LOC106029389	no|down	yes|down	no|down	1
gene10056	ACSL4	acyl-CoA synthetase long-chain family member 4, transcript variant X1	no|up	yes|down	yes|down	2
gene421	RET	ret proto-oncogene	yes|up	yes|up	no|down	2
gene390	OGDHL	oxoglutarate dehydrogenase-like, transcript variant X1	yes|down	yes|down	no|up	2
gene7768	EFHC2	EF-hand domain (C-terminal) containing 2, transcript variant X1	no|up	yes|up	no|up	1
gene8006	PTGER4	prostaglandin E receptor 4 (subtype EP4)	yes|up	yes|up	no|up	2
gene14605	SGIP1	SH3-domain GRB2-like (endophilin) interacting protein 1	yes|down	yes|down	no|down	2
gene14604	PDE4B	phosphodiesterase 4B, cAMP-specific	no|up	yes|down	yes|down	2
gene7760	CASK	calcium/calmodulin-dependent serine protein kinase (MAGUK family), transcript variant X2	yes|up	yes|up	no|down	2
gene18801	LOC106048219	uncharacterized LOC106048219	no|down	yes|down	no|down	1
gene11073	FZD1	frizzled class receptor 1	yes|up	yes|up	no|down	2
gene11070	LOC106039682	pituitary tumor-transforming gene 1 protein-interacting protein-like	no|up	yes|up	no|up	1
gene11700	LOC106040380	uncharacterized LOC106040380	no|up	yes|up	no|up	1
gene11706	SKA3	spindle and kinetochore associated complex subunit 3, transcript variant X1	yes|down	yes|down	no|up	2
gene11254	EED	embryonic ectoderm development	no|down	yes|down	no|down	1
gene10255	BRMS1L	breast cancer metastasis-suppressor 1-like	no|up	yes|up	no|up	1
gene10250	PPP2R3C	protein phosphatase 2, regulatory subunit B'', gamma	no|down	yes|down	no|down	1
gene5468	TMEM159	transmembrane protein 159	no|up	yes|up	no|up	1
gene10253	NFKBIA	nuclear factor of kappa light polypeptide gene enhancer in B-cells inhibitor, alpha	yes|down	yes|down	no|down	2
gene5467	DNAH3	dynein, axonemal, heavy chain 3, transcript variant X1	yes|up	yes|up	no|up	2
gene5464	DCUN1D3	DCN1, defective in cullin neddylation 1, domain containing 3	no|down	yes|down	yes|down	2
gene10259	PAX9	paired box 9, transcript variant X2	no|up	yes|up	no|up	1
gene5460	LOC106033473	acyl-coenzyme A synthetase ACSM3, mitochondrial-like, transcript variant X1	no|up	yes|up	no|up	1
gene18766	CDS1	CDP-diacylglycerol synthase (phosphatidate cytidylyltransferase) 1, transcript variant X1	yes|down	yes|down	no|down	2
gene9602	MGLL	monoglyceride lipase	yes|up	yes|up	no|up	2
gene4234	PEMT	phosphatidylethanolamine N-methyltransferase, transcript variant X2	no|up	yes|up	no|up	1
gene9607	CHCHD6	coiled-coil-helix-coiled-coil-helix domain containing 6, transcript variant X1	no|up	yes|up	no|up	1
gene3916	SLC15A1	solute carrier family 15 (oligopeptide transporter), member 1	no|down	yes|down	no|up	1
gene9357	MAP7D2	MAP7 domain containing 2, transcript variant X1	yes|down	yes|down	no|down	2
gene208	LOC106030078	CWF19-like protein 1, transcript variant X1	yes|up	yes|up	no|up	2
gene19298	EPPK1	epiplakin 1	no|down	yes|down	yes|down	2
gene7903	GK5	glycerol kinase 5 (putative)	no|down	yes|down	no|down	1
gene10651	LOC106039154	chromosome unknown open reading frame, human C2orf54	no|down	yes|down	no|down	1
gene19291	FAM83H	family with sequence similarity 83, member H	no|down	yes|down	no|down	1
gene19290	MAPK15	mitogen-activated protein kinase 15, transcript variant X1	yes|up	yes|up	no|up	2
gene19297	LOC106048737	epiplakin-like	no|down	yes|down	no|up	1
gene19296	NRBP2	nuclear receptor binding protein 2, transcript variant X1	no|up	yes|up	no|up	1
gene8228	CCT5	chaperonin containing TCP1, subunit 5 (epsilon)	no|down	yes|down	no|down	1
gene17389	ACAD11	acyl-CoA dehydrogenase family, member 11	yes|up	yes|up	no|up	2
gene8918	CTIF	CBP80/20-dependent translation initiation factor, transcript variant X3	no|up	yes|up	no|up	1
gene17381	ASTE1	asteroid homolog 1 (Drosophila)	yes|down	yes|down	no|down	2
gene17387	LOC106046668	prostatic acid phosphatase-like, transcript variant X2	yes|down	yes|down	no|down	2
gene5059	LOC106032947	cytochrome P450 4B1-like	yes|up	yes|up	no|down	2
gene11925	IGSF9B	immunoglobulin superfamily, member 9B	yes|down	yes|down	no|down	2
gene5050	LOC106033090	uncharacterized LOC106033090, transcript variant X2	yes|up	yes|up	no|down	2
gene6988	CASP3	caspase 3, apoptosis-related cysteine peptidase	yes|down	yes|down	no|up	2
gene18079	GRAMD2	GRAM domain containing 2	yes|down	yes|down	no|up	2
gene6986	CENPU	centromere protein U, transcript variant X3	yes|down	yes|down	no|up	2
gene8011	FYB	FYN binding protein, transcript variant X1	yes|down	yes|down	no|up	2
gene19078	LOC106048496	glucosylceramidase-like	yes|down	yes|down	no|up	2
gene18166	ZNF185	zinc finger protein 185 (LIM domain), transcript variant X1	yes|down	yes|down	no|down	2
gene19709	SHISA5	shisa family member 5, transcript variant X2	no|down	yes|down	no|down	1
gene18651	RAB30	RAB30, member RAS oncogene family	no|up	yes|up	no|up	1
gene18659	PRSS23	protease, serine, 23, transcript variant X3	yes|up	yes|up	no|down	2
gene19703	OGN	osteoglycin	yes|up	yes|up	no|down	2
gene19704	OMD	osteomodulin	yes|up	yes|up	no|up	2
gene19706	ECM2	extracellular matrix protein 2, female organ and adipocyte specific	yes|up	yes|up	no|up	2
gene5524	ADAP1	ArfGAP with dual PH domains 1, transcript variant X1	no|down	yes|down	no|down	1
gene13288	LOC106042157	cytochrome b-245 heavy chain	yes|down	yes|down	no|up	2
gene13508	GDPD5	glycerophosphodiester phosphodiesterase domain containing 5	no|up	yes|up	no|up	1
gene1192	SULF2	sulfatase 2, transcript variant X5	no|up	yes|up	no|up	1
gene13287	LOC106042158	uncharacterized LOC106042158	yes|down	yes|down	no|up	2
gene13283	RPGR	retinitis pigmentosa GTPase regulator	no|up	yes|up	no|up	1
gene13280	LOC106042145	uncharacterized LOC106042145	no|down	yes|down	no|down	1
gene13281	TSPAN7	tetraspanin 7, transcript variant X2	yes|up	yes|up	no|up	2
gene5181	RANBP10	RAN binding protein 10	no|down	yes|down	no|down	1
gene5180	TSNAXIP1	translin-associated factor X interacting protein 1, transcript variant X1	no|up	yes|up	no|up	1
gene4909	NIPAL4	NIPA-like domain containing 4, transcript variant X2	yes|down	yes|down	no|down	2
gene5185	LOC106033294	C-C motif chemokine 3-like	yes|down	yes|down	no|down	2
gene533	LOC106033328	tumor necrosis factor receptor superfamily member 9-like	no|up	yes|up	no|up	1
gene530	FGFR3	fibroblast growth factor receptor 3, transcript variant X4	no|up	yes|up	no|up	1
gene5188	ARL2BP	ADP-ribosylation factor-like 2 binding protein, transcript variant X1	no|up	yes|up	no|up	1
gene9174	ERCC6L	excision repair cross-complementation group 6-like	yes|down	yes|down	no|up	2
gene4907	CYFIP2	cytoplasmic FMR1 interacting protein 2, transcript variant X2	yes|down	yes|down	no|up	2
gene538	NAT8L	N-acetyltransferase 8-like (GCN5-related, putative)	no|up	yes|up	no|up	1
gene9177	SASH3	SAM and SH3 domain containing 3, transcript variant X1	yes|down	yes|down	no|up	2
gene7164	CNR1	cannabinoid receptor 1 (brain), transcript variant X1	no|up	yes|up	no|up	1
gene7167	PM20D2	peptidase M20 domain containing 2	no|up	yes|up	no|up	1
gene6570	OTOP2	otopetrin 2	no|down	yes|down	no|up	1
gene16381	DTX1	deltex 1, E3 ubiquitin ligase	yes|down	yes|down	no|up	2
gene2087	GLI2	GLI family zinc finger 2	yes|up	yes|up	no|down	2
gene2082	LOC106029876	leucine-zipper-like transcriptional regulator 1, transcript variant X1	yes|up	yes|up	no|down	2
gene12883	NHLRC1	NHL repeat containing E3 ubiquitin protein ligase 1	no|up	yes|up	no|up	1
gene12882	TPMT	thiopurine S-methyltransferase	no|up	yes|up	no|up	1
gene12732	CFH	complement factor H	yes|up	yes|up	no|down	2
gene2668	LOC106030437	glutathione S-transferase-like	yes|up	yes|up	no|up	2
gene15705	LOC106044797	cytochrome P450 2J6-like	yes|down	yes|down	no|up	2
gene2666	LOC106030436	glutathione S-transferase-like, transcript variant X2	no|up	yes|up	yes|up	2
gene7292	RELN	reelin	yes|up	yes|up	no|down	2
gene645	FGFBP1	fibroblast growth factor binding protein 1	no|down	yes|down	no|down	1
gene19851	CLDN10	claudin 10	no|up	yes|up	yes|up	2
gene17969	DNM1	dynamin 1	yes|up	yes|up	no|up	2
gene19854	UGGT2	UDP-glucose glycoprotein glucosyltransferase 2	yes|up	yes|up	no|up	2
gene17963	GLE1	GLE1 RNA export mediator	yes|down	yes|down	no|down	2
gene17476	LOC106046794	uncharacterized LOC106046794	yes|down	yes|down	no|down	2
gene17964	ODF2	outer dense fiber of sperm tails 2, transcript variant X1	yes|down	yes|down	no|up	2
gene12086	LOC106040774	DEP domain-containing mTOR-interacting protein-like	yes|down	yes|down	no|up	2
gene12269	LOC106041004	origin recognition complex subunit 4-like, transcript variant X2	no|down	yes|down	no|down	1
gene15837	ZNF532	zinc finger protein 532, transcript variant X1	no|up	yes|up	no|up	1
gene15833	ATP8B1	ATPase, aminophospholipid transporter, class I, type 8B, member 1, transcript variant X3	yes|down	yes|down	no|down	2
gene7346	ITGA2	integrin, alpha 2 (CD49B, alpha 2 subunit of VLA-2 receptor)	yes|down	yes|down	no|down	2
gene12638	LOC106041491	C-C motif chemokine 3-like	yes|down	yes|down	no|up	2
gene1404	CHST1	carbohydrate (keratan sulfate Gal-6) sulfotransferase 1	yes|down	yes|down	yes|down	3
gene5618	CCPG1	cell cycle progression 1, transcript variant X3	yes|up	yes|up	no|down	2
gene5612	UNC13C	unc-13 homolog C (C. elegans), transcript variant X1	no|up	yes|up	no|up	1
gene3131	ADIPOR2	adiponectin receptor 2, transcript variant X1	no|up	yes|up	no|up	1
gene20322	CGN	cingulin	no|down	yes|down	no|down	1
gene20321	TUFT1	tuftelin 1	no|down	yes|down	no|down	1
gene15122	LOC106044084	collagen alpha-1(V) chain-like	no|up	yes|up	no|up	1
gene16610	LOC106045801	uncharacterized LOC106045801, transcript variant X1	no|down	yes|down	no|down	1
gene14831	PSIP1	PC4 and SFRS1 interacting protein 1, transcript variant X1	no|down	yes|down	no|down	1
gene14832	SNAPC3	small nuclear RNA activating complex, polypeptide 3, 50kDa	no|down	yes|down	no|down	1
gene6723	NDC80	NDC80 kinetochore complex component, transcript variant X1	yes|down	yes|down	no|up	2
gene8032	PRLR	prolactin receptor, transcript variant X20	no|up	yes|up	no|up	1
gene14611	IL23R	interleukin 23 receptor	no|down	yes|down	no|down	1
gene14612	IL12RB2	interleukin 12 receptor, beta 2	yes|down	yes|down	no|down	2
gene14619	LOC106043624	methylcrotonoyl-CoA carboxylase beta chain, mitochondrial-like, transcript variant X1	no|up	yes|up	no|up	1
gene8039	C1QTNF3	C1q and tumor necrosis factor related protein 3, transcript variant X1	yes|up	yes|up	no|up	2
gene18816	LOC106048210	tyrosine-protein kinase JAK3-like	yes|down	yes|down	no|up	2
gene20184	GSDMA	gasdermin A	yes|up	yes|up	no|up	2
gene20183	ORMDL3	ORMDL sphingolipid biosynthesis regulator 3	yes|up	yes|up	no|up	2
gene20180	IKZF3	IKAROS family zinc finger 3 (Aiolos), transcript variant X1	yes|down	yes|down	no|up	2
gene11064	STEAP1	six transmembrane epithelial antigen of the prostate 1, transcript variant X2	yes|up	yes|up	no|up	2
gene11065	STEAP2	STEAP family member 2, metalloreductase, transcript variant X1	yes|up	yes|up	no|up	2
gene18818	FANCB	Fanconi anemia, complementation group B	yes|down	yes|down	no|down	2
gene14091	TMEM246	transmembrane protein 246	no|up	yes|up	no|up	1
gene19334	DUSP3	dual specificity phosphatase 3	no|up	yes|up	no|up	1
gene11711	N6AMT2	N-6 adenine-specific DNA methyltransferase 2 (putative), transcript variant X1	yes|down	yes|down	no|down	2
gene11716	LOC106040406	gap junction beta-6 protein	yes|down	yes|down	no|down	2
gene11717	LOC106040409	gap junction beta-6 protein-like	yes|down	yes|down	no|down	2
gene11247	TMEM126A	transmembrane protein 126A	no|up	yes|up	no|up	1
gene1970	NANP	N-acetylneuraminic acid phosphatase	no|down	yes|down	no|down	1
gene1973	RMDN2	regulator of microtubule dynamics 2, transcript variant X5	no|up	yes|up	yes|up	2
gene5470	CRYM	crystallin, mu, transcript variant X1	yes|up	yes|up	no|up	2
gene5476	VWA3A	von Willebrand factor A domain containing 3A, transcript variant X2	no|down	yes|down	no|down	1
gene14465	IL10RB	interleukin 10 receptor, beta	no|down	yes|down	no|down	1
gene2984	LOC106030817	cytosolic 5'-nucleotidase 1B-like	no|down	yes|down	no|down	1
gene20058	S1PR4	sphingosine-1-phosphate receptor 4	yes|down	yes|down	no|down	2
gene20509	HPX	hemopexin	no|down	yes|down	no|down	1
gene20050	LOC106049547	uncharacterized LOC106049547	no|up	yes|down	yes|down	2
gene20501	LOC106029353	induced myeloid leukemia cell differentiation protein Mcl-1 homolog	no|up	yes|down	yes|down	2
gene20056	LOC106049556	activated RNA polymerase II transcriptional coactivator p15-like	no|up	yes|up	no|up	1
gene13310	TOP1MT	topoisomerase (DNA) I, mitochondrial, transcript variant X2	yes|down	yes|down	no|up	2
gene8699	LOC106037090	P2Y purinoceptor 2-like	no|down	yes|down	no|down	1
gene8697	LOC106037044	glutamine synthetase	no|up	yes|down	yes|down	2
gene2571	LOC106030345	macrophage mannose receptor 1-like, transcript variant X1	yes|up	yes|up	no|down	2
gene2573	LOC106030347	macrophage mannose receptor 1-like	yes|up	yes|up	no|up	2
gene8744	TRAF2	TNF receptor-associated factor 2, transcript variant X1	yes|down	yes|down	no|up	2
gene7933	IRS1	insulin receptor substrate 1	no|up	yes|up	no|up	1
gene3909	MBNL2	muscleblind-like splicing regulator 2, transcript variant X1	yes|up	yes|up	no|down	2
gene230	ASAH2	N-acylsphingosine amidohydrolase (non-lysosomal ceramidase) 2	no|down	yes|down	yes|down	2
gene10624	SLCO2A1	solute carrier organic anion transporter family, member 2A1	no|down	yes|down	yes|down	2
gene10626	TF	transferrin, transcript variant X1	no|up	yes|up	no|up	1
gene19283	RAMP3	receptor (G protein-coupled) activity modifying protein 3, transcript variant X1	yes|up	yes|up	no|up	2
gene8965	NOX1	NADPH oxidase 1	yes|down	yes|down	no|up	2
gene8961	SRPX2	sushi-repeat containing protein, X-linked 2	yes|up	yes|up	no|up	2
gene17395	SMARCA5	SWI/SNF related, matrix associated, actin dependent regulator of chromatin, subfamily a, member 5, transcript variant X1	yes|down	yes|down	no|down	2
gene17397	GAB1	GRB2-associated binding protein 1	no|up	yes|up	no|up	1
gene17390	ACKR4	atypical chemokine receptor 4	yes|up	yes|up	no|up	2
gene5066	DMBX1	diencephalon/mesencephalon homeobox 1	yes|up	yes|up	no|down	2
gene5968	RGL1	ral guanine nucleotide dissociation stimulator-like 1	no|up	yes|up	no|up	1
gene6998	LOC106035143	uncharacterized LOC106035143	yes|down	yes|down	no|down	2
gene6993	STOX2	storkhead box 2	no|up	yes|up	no|up	1
gene17711	IFITM5	interferon induced transmembrane protein 5	no|down	yes|down	no|down	1
gene17712	LOC106047031	interferon-induced transmembrane protein 3-like	yes|down	yes|down	no|down	2
gene17713	B4GALNT4	beta-1,4-N-acetyl-galactosaminyl transferase 4	yes|down	yes|down	no|down	2
gene17714	PKP3	plakophilin 3, transcript variant X1	yes|down	yes|down	no|down	2
gene18003	TCERG1L	transcription elongation regulator 1-like	yes|down	yes|down	no|up	2
gene17717	ANO9	anoctamin 9, transcript variant X1	yes|down	yes|down	no|up	2
gene19064	KIAA0907	KIAA0907 ortholog	no|down	yes|down	no|down	1
gene18627	PTRF	polymerase I and transcript release factor	yes|up	yes|up	no|up	2
gene13633	LOC106042532	ADAMTS-like protein 2, transcript variant X1	no|up	yes|up	no|up	1
gene17575	LYPD6B	LY6/PLAUR domain containing 6B, transcript variant X1	yes|up	yes|up	no|up	2
gene18623	LOC106047990	inactive phospholipase C-like protein 2	yes|down	yes|down	no|up	2
gene497	CD8A	CD8a molecule	yes|down	yes|down	no|up	2
gene948	NIT2	nitrilase family, member 2, transcript variant X1	no|up	yes|up	no|up	1
gene1185	SLC2A10	solute carrier family 2 (facilitated glucose transporter), member 10, transcript variant X1	yes|up	yes|up	no|up	2
gene1187	EYA2	EYA transcriptional coactivator and phosphatase 2, transcript variant X1	yes|up	yes|up	no|up	2
gene540	HAUS3	HAUS augmin-like complex, subunit 3	yes|down	yes|down	no|down	2
gene4919	EBF1	early B-cell factor 1, transcript variant X1	yes|up	yes|up	no|down	2
gene9163	LOC106037566	desmoglein-4-like	yes|down	yes|down	no|down	2
gene9162	LOC106037565	desmocollin-2-like	yes|down	yes|down	no|down	2
gene548	TNIP2	TNFAIP3 interacting protein 2	no|down	yes|down	yes|down	2
gene4911	SOX30	SRY (sex determining region Y)-box 30	yes|down	yes|down	no|up	2
gene4910	ADAM19	ADAM metallopeptidase domain 19	yes|down	yes|down	no|down	2
gene9164	DSG2	desmoglein 2, transcript variant X1	yes|down	yes|down	no|down	2
gene2475	ANKRD28	ankyrin repeat domain 28, transcript variant X1	no|down	yes|down	yes|down	2
gene7116	LOC106035334	uncharacterized LOC106035334	no|up	yes|up	no|up	1
gene2473	HACL1	2-hydroxyacyl-CoA lyase 1	no|up	yes|up	no|up	1
gene18743	FKBP4	FK506 binding protein 4, 59kDa	yes|down	yes|down	no|down	2
gene6504	LOC106034712	uncharacterized LOC106034712	no|up	yes|up	no|up	1
gene6506	RAB11FIP4	RAB11 family interacting protein 4 (class II), transcript variant X1	no|down	yes|down	no|down	1
gene6501	UTP6	UTP6, small subunit (SSU) processome component, homolog (yeast)	no|down	yes|down	no|down	1
gene6502	COPRS	coordinator of PRMT5, differentiation stimulator, transcript variant X1	no|up	yes|up	no|up	1
gene12896	JARID2	jumonji, AT rich interactive domain 2, transcript variant X1	yes|up	yes|up	no|down	2
gene12725	NTS	neurotensin	yes|down	yes|down	no|down	2
gene12890	CD83	CD83 molecule	yes|down	yes|down	yes|down	3
gene12723	ALX1	ALX homeobox 1	yes|up	yes|up	no|up	2
gene2690	ARHGEF10	Rho guanine nucleotide exchange factor (GEF) 10, transcript variant X1	no|up	yes|up	no|up	1
gene2699	SH3YL1	SH3 and SYLF domain containing 1	no|down	yes|down	no|up	1
gene16111	RAB11FIP2	RAB11 family interacting protein 2 (class I)	yes|up	yes|up	no|down	2
gene13414	RTN4	reticulon 4, transcript variant X1	yes|up	yes|up	no|up	2
gene16119	SLC18A2	solute carrier family 18 (vesicular monoamine transporter), member 2	no|down	yes|down	no|down	1
gene13411	SPTBN1	spectrin, beta, non-erythrocytic 1, transcript variant X1	yes|up	yes|up	no|up	2
gene13228	CCNB1	cyclin B1	no|up	yes|up	yes|up	2
gene15822	RAB27B	RAB27B, member RAS oncogene family, transcript variant X1	no|down	yes|down	no|down	1
gene12273	VPS37D	vacuolar protein sorting 37 homolog D (S. cerevisiae)	yes|down	yes|down	no|up	2
gene9713	PLA2G7	phospholipase A2, group VII (platelet-activating factor acetylhydrolase, plasma)	yes|down	yes|down	no|up	2
gene16591	LOC106045796	uncharacterized LOC106045796	no|up	yes|up	no|up	1
gene16594	TRPV3	transient receptor potential cation channel, subfamily V, member 3, transcript variant X3	no|down	yes|down	no|down	1
gene6326	ACKR3	atypical chemokine receptor 3, transcript variant X1	no|down	yes|down	no|down	1
gene6322	IQCA1	IQ motif containing with AAA domain 1, transcript variant X1	yes|up	yes|up	no|up	2
gene1417	DGKZ	diacylglycerol kinase, zeta	yes|down	yes|down	no|up	2
gene1416	CREB3L1	cAMP responsive element binding protein 3-like 1, transcript variant X1	no|up	yes|up	no|up	1
gene13708	TSSC4	tumor suppressing subtransferable candidate 4, transcript variant X1	no|up	yes|up	no|up	1
gene3122	CECR1	cat eye syndrome chromosome region, candidate 1, transcript variant X1	no|up	yes|up	no|up	1
gene3127	LOC106030932	mRNA-decapping enzyme 1B-like	yes|up	yes|up	no|up	2
gene14449	MRPS6	mitochondrial ribosomal protein S6, transcript variant X1	yes|down	yes|down	no|up	2
gene14995	SLITRK6	SLIT and NTRK-like family, member 6, transcript variant X1	yes|down	yes|down	no|down	2
gene20335	LOC106049856	uncharacterized LOC106049856	no|down	yes|down	no|down	1
gene20337	LOC106049848	class I histocompatibility antigen, F10 alpha chain-like	no|down	yes|down	no|down	1
gene15132	ACER2	alkaline ceramidase 2, transcript variant X1	no|down	yes|down	no|down	1
gene16629	NUFIP2	nuclear fragile X mental retardation protein interacting protein 2	no|down	yes|down	no|down	1
gene16625	SSH2	slingshot protein phosphatase 2	no|down	yes|down	no|down	1
gene20338	LOC106049849	complement C4-A-like	yes|down	yes|down	no|up	2
gene465	PLAU	plasminogen activator, urokinase	yes|down	yes|down	no|down	2
gene20199	LOC106049710	uncharacterized LOC106049710, transcript variant X1	yes|up	yes|up	no|up	2
gene14666	LOC106043628	uncharacterized LOC106043628	yes|down	yes|down	no|down	2
gene14191	LOC106043089	uncharacterized LOC106043089, transcript variant X2	yes|down	yes|down	no|down	2
gene14662	KIF23	kinesin family member 23	yes|down	yes|down	no|down	2
gene20193	LOC106049694	lysine-specific demethylase 6B-like	no|down	yes|down	no|down	1
gene2985	KCTD8	potassium channel tetramerization domain containing 8	no|up	yes|up	no|up	1
gene2114	MUC13	mucin 13, cell surface associated, transcript variant X1	no|down	yes|down	no|down	1
gene11237	FOXR1	forkhead box R1	yes|down	yes|down	no|down	2
gene11383	CLK1	CDC-like kinase 1, transcript variant X1	yes|down	yes|down	no|up	2
gene11721	LOC106040370	uncharacterized LOC106040370	no|down	yes|down	no|down	1
gene1969	EIF2AK2	eukaryotic translation initiation factor 2-alpha kinase 2, transcript variant X1	no|down	yes|down	no|down	1
gene14268	LOC106043207	uncharacterized LOC106043207	yes|down	yes|down	no|up	2
gene5401	GSG1L	GSG1-like, transcript variant X1	no|down	yes|down	no|down	1
gene5402	IL20RB	interleukin 20 receptor beta	yes|down	yes|down	no|up	2
gene14263	TTC31	tetratricopeptide repeat domain 31	no|down	yes|down	no|down	1
gene14264	LOC106043196	zinc finger CCCH domain-containing protein 40-like	yes|down	yes|down	no|down	2
gene14267	LOC106043193	dedicator of cytokinesis protein 2-like	yes|down	yes|down	no|down	2
gene2995	GABRA4	gamma-aminobutyric acid (GABA) A receptor, alpha 4, transcript variant X1	no|up	yes|up	no|up	1
gene20518	LOC106029373	protein-glutamine gamma-glutamyltransferase K-like	yes|down	yes|down	no|down	2
gene20043	LOC106049538	HEPACAM family member 2-like	yes|down	yes|down	yes|down	3
gene20046	SLC35E4	solute carrier family 35, member E4	no|down	yes|down	yes|down	2
gene8681	TNFSF8	tumor necrosis factor (ligand) superfamily, member 8	yes|down	yes|down	no|down	2
gene8680	TNC	tenascin C, transcript variant X5	no|up	yes|down	yes|down	2
gene8683	LOC106037097	uncharacterized LOC106037097	no|down	yes|down	yes|down	2
gene8682	TNFSF15	tumor necrosis factor (ligand) superfamily, member 15, transcript variant X3	no|up	yes|down	no|down	1
gene8686	ATP6V1G1	ATPase, H+ transporting, lysosomal 13kDa, V1 subunit G1	no|down	yes|down	no|down	1
gene6690	LYRM4	LYR motif containing 4	no|up	yes|up	no|up	1
gene6692	CDYL	chromodomain protein, Y-like, transcript variant X1	no|up	yes|up	no|up	1
gene17870	LOC106047195	myosin heavy chain, skeletal muscle, adult-like	yes|up	yes|up	no|up	2
gene9377	ACOT9	acyl-CoA thioesterase 9	yes|up	yes|up	no|up	2
gene9375	PTCHD1	patched domain containing 1	yes|up	yes|up	no|down	2
gene9370	MBTPS2	membrane-bound transcription factor peptidase, site 2, transcript variant X1	no|up	yes|up	no|up	1
gene9371	SMS	spermine synthase, transcript variant X2	no|down	yes|down	no|down	1
gene8205	IKZF1	IKAROS family zinc finger 1 (Ikaros), transcript variant X3	yes|down	yes|down	no|up	2
gene8756	CLIC3	chloride intracellular channel 3	no|down	yes|down	no|down	1
gene8754	FUT7	fucosyltransferase 7 (alpha (1,3) fucosyltransferase), transcript variant X1	yes|down	yes|down	no|down	2
gene226	PAPSS2	3'-phosphoadenosine 5'-phosphosulfate synthase 2	no|down	yes|down	yes|down	2
gene9378	SAT1	spermidine/spermine N1-acetyltransferase 1	yes|down	yes|down	no|down	2
gene19271	LOC106048725	T-cell receptor beta-2 chain C region-like	yes|down	yes|down	no|up	2
gene19270	LOC106048724	T-cell receptor beta-1 chain C region-like	yes|down	yes|down	no|up	2
gene19273	LOC106048722	transient receptor potential cation channel subfamily V member 6-like	no|down	yes|down	no|down	1
gene19272	EPHB6	EPH receptor B6	no|down	yes|down	no|down	1
gene10638	NEU4	sialidase 4	no|down	yes|down	yes|down	2
gene10632	NRROS	negative regulator of reactive oxygen species, transcript variant X2	yes|down	yes|down	no|up	2
gene10631	CEP19	centrosomal protein 19kDa, transcript variant X3	no|up	yes|up	no|up	1
gene19498	LOC106048962	ras GTPase-activating-like protein IQGAP3	yes|down	yes|down	no|down	2
gene8973	FGF13	fibroblast growth factor 13, transcript variant X1	yes|up	yes|up	no|down	2
gene17364	FAM198A	family with sequence similarity 198, member A	yes|up	yes|up	no|up	2
gene19493	LMNA	lamin A/C	no|up	yes|down	yes|down	2
gene19495	RAB25	RAB25, member RAS oncogene family	no|down	yes|down	no|down	1
gene9089	SDHAF3	succinate dehydrogenase complex assembly factor 3	no|down	yes|up	yes|up	2
gene11909	ST14	suppression of tumorigenicity 14 (colon carcinoma), transcript variant X1	no|up	yes|down	yes|down	2
gene9085	ASNS	asparagine synthetase (glutamine-hydrolyzing)	no|down	yes|down	no|down	1
gene11905	LOC106040581	uncharacterized LOC106040581	no|down	yes|down	no|down	1
gene11904	LOC106040547	transmembrane protein 45B-like	yes|down	yes|down	no|down	2
gene5078	PIK3R3	phosphoinositide-3-kinase, regulatory subunit 3 (gamma)	no|up	yes|up	no|up	1
gene11901	BARX2	BARX homeobox 2, transcript variant X1	no|up	yes|up	no|up	1
gene17769	LOC106047052	uncharacterized LOC106047052	no|up	yes|up	no|up	1
gene17768	LOC106047050	NACHT, LRR and PYD domains-containing protein 3-like, transcript variant X1	yes|up	yes|up	no|up	2
gene18016	ADGRL3	adhesion G protein-coupled receptor L3, transcript variant X1	yes|up	yes|up	no|up	2
gene18015	LOC106047346	chromosome unknown open reading frame, human C9orf3	no|down	yes|down	no|down	1
gene17763	EPS8L2	EPS8-like 2	yes|up	yes|up	no|up	2
gene19016	ETV7	ets variant 7, transcript variant X2	yes|down	yes|down	no|down	2
gene19011	KCNA2	potassium channel, voltage gated shaker related subfamily A, member 2, transcript variant X2	no|up	yes|up	yes|up	2
gene18636	CNTNAP1	contactin associated protein 1	yes|up	yes|up	no|down	2
gene18637	EZH1	enhancer of zeste 1 polycomb repressive complex 2 subunit, transcript variant X1	no|up	yes|up	no|up	1
gene17507	LOC106046816	GTPase IMAP family member 4-like	yes|down	yes|down	no|up	2
gene17506	LOC106046813	GTPase IMAP family member 1-like	yes|down	yes|down	no|up	2
gene17501	SLC16A3	solute carrier family 16 (monocarboxylate transporter), member 3, transcript variant X2	no|down	yes|down	yes|down	2
gene19723	LOC106049228	SLAM family member 5-like, transcript variant X1	yes|down	yes|down	no|up	2
gene19721	LOC106049230	SLAM family member 8-like	yes|down	yes|down	no|up	2
gene1172	HNF4A	hepatocyte nuclear factor 4, alpha	no|down	yes|down	no|down	1
gene1175	FITM2	fat storage-inducing transmembrane protein 2, transcript variant X1	no|up	yes|up	no|up	1
gene1176	GDAP1L1	ganglioside induced differentiation associated protein 1-like 1	no|up	yes|up	no|up	1
gene9401	RSRP1	arginine/serine-rich protein 1, transcript variant X1	yes|down	yes|down	no|up	2
gene9404	RUNX3	runt-related transcription factor 3	yes|down	yes|down	no|up	2
gene556	GRK4	G protein-coupled receptor kinase 4, transcript variant X1	yes|down	yes|down	no|up	2
gene557	LOC106034660	uncharacterized LOC106034660	yes|down	yes|down	no|down	2
gene9408	NCMAP	noncompact myelin associated protein, transcript variant X1	yes|down	yes|down	no|up	2
gene2469	SCRN1	secernin 1, transcript variant X2	no|up	yes|up	no|up	1
gene2468	WIPF3	WAS/WASL interacting protein family, member 3, transcript variant X2	yes|up	yes|up	no|up	2
gene16361	LOC106045509	uncharacterized LOC106045509	yes|down	yes|down	no|up	2
gene6519	HLF	hepatic leukemia factor	yes|up	yes|up	no|down	2
gene6517	PCTP	phosphatidylcholine transfer protein, transcript variant X1	no|up	yes|up	no|up	1
gene4801	SPOCK1	sparc/osteonectin, cwcv and kazal-like domains proteoglycan (testican) 1, transcript variant X1	no|up	yes|up	no|up	1
gene12861	CREG2	cellular repressor of E1A-stimulated genes 2	yes|up	yes|up	yes|up	3
gene13629	SOAT1	sterol O-acyltransferase 1	no|down	yes|down	no|down	1
gene9527	ZC3H12A	zinc finger CCCH-type containing 12A	no|down	yes|down	no|down	1
gene13622	ANGPTL1	angiopoietin-like 1	yes|up	yes|up	no|down	2
gene12718	SLC6A15	solute carrier family 6 (neutral amino acid transporter), member 15	yes|down	yes|down	no|up	2
gene17041	LOC106046290	potassium voltage-gated channel subfamily A member 1-like, transcript variant X1	no|up	yes|up	no|up	1
gene15726	B3GNT7	UDP-GlcNAc:betaGal beta-1,3-N-acetylglucosaminyltransferase 7	no|down	yes|down	no|down	1
gene15729	HTR2B	5-hydroxytryptamine (serotonin) receptor 2B, G protein-coupled, transcript variant X2	no|down	yes|down	no|down	1
gene9299	CENPI	centromere protein I, transcript variant X2	yes|down	yes|down	no|up	2
gene13403	CHAC2	ChaC, cation transport regulator homolog 2 (E. coli)	no|down	yes|down	no|down	1
gene19873	LOC106049353	collagen alpha-2(XI) chain-like	yes|up	yes|up	no|down	2
gene19872	LOC106049352	soluble scavenger receptor cysteine-rich domain-containing protein SSC5D-like	no|up	yes|up	no|up	1
gene19871	LOC106049351	DNA-directed RNA polymerase II subunit RPB1-like	yes|up	yes|up	no|down	2
gene326	LRRTM3	leucine rich repeat transmembrane neuronal 3, transcript variant X1	no|down	yes|down	no|down	1
gene13409	ACYP2	acylphosphatase 2, muscle type, transcript variant X4	no|up	yes|up	no|up	1
gene8830	ZBTB25	zinc finger and BTB domain containing 25, transcript variant X1	yes|down	yes|down	no|up	2
gene7825	LOC106036132	interferon-induced GTP-binding protein Mx, transcript variant X1	yes|down	yes|down	no|down	2
gene1798	LOC106047490	uncharacterized LOC106047490, transcript variant X3	no|up	yes|up	no|up	1
gene1791	SLC38A4	solute carrier family 38, member 4, transcript variant X2	yes|up	yes|up	no|up	2
gene1792	SLC38A2	solute carrier family 38, member 2	no|down	yes|down	no|down	1
gene3731	CENPF	centromere protein F, 350/400kDa	yes|down	yes|down	no|down	2
gene15586	MMEL1	membrane metallo-endopeptidase-like 1, transcript variant X2	yes|up	yes|up	no|up	2
gene12283	FZD9	frizzled class receptor 9	no|up	yes|up	no|up	1
gene12282	LOC106041056	uncharacterized LOC106041056	yes|up	yes|up	no|down	2
gene15852	LOC106045009	ectoderm-neural cortex protein 1-like	yes|down	yes|down	yes|down	3
gene12289	LOC106041087	E3 ubiquitin-protein ligase TRIM39-like	no|down	yes|down	no|down	1
gene12288	LOC106041089	C-C motif chemokine 3-like 1	no|down	yes|down	yes|down	2
gene10701	BDH1	3-hydroxybutyrate dehydrogenase, type 1	yes|down	yes|down	no|up	2
gene3332	RHOF	ras homolog family member F (in filopodia)	yes|down	yes|down	no|up	2
gene3485	LOC106031279	uncharacterized LOC106031279	yes|down	yes|down	no|down	2
gene3480	LOC106031434	somatomedin-B and thrombospondin type-1 domain-containing protein-like	no|down	yes|down	no|down	1
gene7326	SEMA3E	sema domain, immunoglobulin domain (Ig), short basic domain, secreted, (semaphorin) 3E, transcript variant X1	yes|up	yes|up	no|up	2
gene16588	ULK2	unc-51 like autophagy activating kinase 2	no|up	yes|up	no|up	1
gene7323	PCLO	piccolo presynaptic cytomatrix protein	yes|up	yes|up	no|up	2
gene7321	HGF	hepatocyte growth factor (hepapoietin A; scatter factor), transcript variant X1	yes|up	yes|up	yes|down	3
gene16586	LOC106045763	fatty aldehyde dehydrogenase-like	yes|up	yes|up	no|up	2
gene16587	LOC106045817	fatty aldehyde dehydrogenase-like, transcript variant X1	yes|up	yes|up	no|up	2
gene7329	SEMA3D	sema domain, immunoglobulin domain (Ig), short basic domain, secreted, (semaphorin) 3D, transcript variant X2	yes|up	yes|up	no|down	2
gene6335	LOC106034499	uncharacterized LOC106034499	yes|down	yes|down	yes|down	3
gene6334	LRRFIP1	leucine rich repeat (in FLII) interacting protein 1	no|down	yes|down	no|down	1
gene3228	SPIC	Spi-C transcription factor (Spi-1/PU.1 related), transcript variant X3	yes|down	yes|down	no|down	2
gene1427	LRP4	low density lipoprotein receptor-related protein 4, transcript variant X2	no|up	yes|up	no|up	1
gene5678	GTF2A2	general transcription factor IIA, 2, 12kDa	yes|down	yes|down	no|up	2
gene5673	OTUD7A	OTU deubiquitinase 7A, transcript variant X1	yes|down	yes|down	no|down	2
gene15458	FAM228B	family with sequence similarity 228, member B, transcript variant X1	no|up	yes|up	no|up	1
gene14982	CENPC	centromere protein C	yes|down	yes|down	no|down	2
gene15108	SLC2A6	solute carrier family 2 (facilitated glucose transporter), member 6	yes|down	yes|down	no|down	2
gene14455	CRYZL1	crystallin, zeta (quinone reductase)-like 1, transcript variant X1	no|up	yes|up	no|up	1
gene14989	EPHA5	EPH receptor A5, transcript variant X1	no|up	yes|up	no|up	1
gene15107	CACFD1	calcium channel flower domain containing 1	no|down	yes|up	yes|up	2
gene3159	FAM60A	family with sequence similarity 60, member A, transcript variant X2	yes|down	yes|down	no|down	2
gene16635	OPTC	opticin, transcript variant X1	yes|up	yes|up	no|up	2
gene16636	PRELP	proline/arginine-rich end leucine-rich repeat protein	no|up	yes|up	yes|up	2
gene16639	BTG2	BTG family, member 2	no|down	yes|down	yes|down	2
gene14856	IRF4	interferon regulatory factor 4	yes|down	yes|down	no|up	2
gene14857	DUSP22	dual specificity phosphatase 22	no|up	yes|up	no|up	1
gene14180	LOC106043079	calpain small subunit 1-like	yes|down	yes|down	no|up	2
gene14182	LOC106043080	uncharacterized LOC106043080, transcript variant X1	no|up	yes|up	no|up	1
gene14183	MMP2	matrix metallopeptidase 2	yes|up	yes|up	no|down	2
gene14185	LOC106043083	uncharacterized LOC106043083, transcript variant X3	yes|up	yes|up	no|up	2
gene18839	NUP160	nucleoporin 160kDa	yes|down	yes|down	no|down	2
gene14670	ITGA11	integrin, alpha 11	yes|up	yes|up	no|down	2
gene18834	LOC106048250	membrane-associated phosphatidylinositol transfer protein 1-like	no|up	yes|down	yes|down	2
gene11000	SHCBP1	SHC SH2-domain binding protein 1	yes|down	yes|down	no|up	2
gene20296	CDC42EP2	CDC42 effector protein (Rho GTPase binding) 2	no|down	yes|down	no|down	1
gene14279	MAB21L1	mab-21-like 1 (C. elegans)	yes|up	yes|up	no|up	2
gene7486	LOC106035751	interleukin-5 receptor subunit alpha-like, transcript variant X1	yes|down	yes|down	no|down	2
gene7487	LOC106035752	granulocyte-macrophage colony-stimulating factor receptor subunit alpha-like, transcript variant X1	yes|down	yes|down	no|up	2
gene14274	DOK1	docking protein 1, 62kDa (downstream of tyrosine kinase 1)	yes|down	yes|down	no|down	2
gene18243	FGF12	fibroblast growth factor 12	no|up	yes|up	yes|up	2
gene1888	MTR	5-methyltetrahydrofolate-homocysteine methyltransferase	no|up	yes|up	no|up	1
gene20078	TOP2A	topoisomerase (DNA) II alpha 170kDa	yes|down	yes|down	no|up	2
gene20076	IGFBP4	insulin-like growth factor binding protein 4	yes|up	yes|up	no|up	2
gene20074	CCR7	chemokine (C-C motif) receptor 7	yes|down	yes|down	no|down	2
gene1880	GPR137B	G protein-coupled receptor 137B, transcript variant X1	no|down	yes|down	no|down	1
gene20071	KRT222	keratin 222, type II, transcript variant X1	yes|down	yes|down	no|down	2
gene1883	EDARADD	EDAR-associated death domain	yes|down	yes|down	no|down	2
gene20702	LOC106029567	uncharacterized LOC106029567, transcript variant X1	yes|up	yes|up	no|down	2
gene6683	F13A1	coagulation factor XIII, A1 polypeptide, transcript variant X2	yes|up	yes|up	no|down	2
gene20707	LOC106029573	interferon-induced guanylate-binding protein 2-like	no|down	yes|down	no|down	1
gene4209	LOC106032083	uncharacterized LOC106032083	no|up	yes|up	no|up	1
gene3921	GPR18	G protein-coupled receptor 18	yes|down	yes|down	no|up	2
gene3923	LOC106031807	G-protein coupled receptor 183-like, transcript variant X1	yes|down	yes|down	no|up	2
gene3922	LOC106031806	G-protein coupled receptor 183-like	no|down	yes|down	no|down	1
gene9366	CNKSR2	connector enhancer of kinase suppressor of Ras 2	no|up	yes|up	no|up	1
gene8762	DPP7	dipeptidyl-peptidase 7	no|up	yes|up	yes|up	2
gene8763	LOC106037125	kelch-like protein 13	no|up	yes|up	yes|up	2
gene8766	LOC106037161	uncharacterized protein C14orf37 homolog, transcript variant X2	no|down	yes|down	no|down	1
gene8764	LOC106037110	dual specificity testis-specific protein kinase 2-like, transcript variant X1	yes|up	yes|up	yes|up	3
gene19262	BIN2	bridging integrator 2	yes|down	yes|down	no|up	2
gene19260	GALNT6	polypeptide N-acetylgalactosaminyltransferase 6	yes|down	yes|down	no|up	2
gene16955	LOC106046186	tyrosine-protein phosphatase non-receptor type 7-like	yes|down	yes|down	no|up	2
gene19268	LETMD1	LETM1 domain containing 1	no|up	yes|up	no|up	1
gene3953	LOC106031833	uncharacterized LOC106031833, transcript variant X2	no|down	yes|down	yes|down	2
gene11736	EXPH5	exophilin 5	no|down	yes|down	no|down	1
gene17371	MTURN	maturin, neural progenitor differentiation regulator homolog (Xenopus)	yes|up	yes|up	no|up	2
gene17377	COL6A6	collagen, type VI, alpha 6, transcript variant X2	yes|down	yes|down	yes|down	3
gene10171	LOC106038694	carboxypeptidase A1-like	no|down	yes|down	no|down	1
gene17378	PIK3R4	phosphoinositide-3-kinase, regulatory subunit 4	no|down	yes|down	no|down	1
gene11910	LOC106040586	uncharacterized LOC106040586, transcript variant X3	no|down	yes|down	yes|down	2
gene11914	LOC106040545	uncharacterized LOC106040545	no|up	yes|up	no|up	1
gene9091	DLX5	distal-less homeobox 5	yes|down	yes|down	no|up	2
gene1229	ATP9A	ATPase, class II, type 9A	yes|up	yes|up	no|down	2
gene17779	ZNF750	zinc finger protein 750	yes|down	yes|down	no|up	2
gene1222	KCNG1	potassium channel, voltage gated modifier subfamily G, member 1, transcript variant X2	yes|up	yes|up	no|up	2
gene1226	LOC106041591	uncharacterized LOC106041591, transcript variant X1	no|down	yes|down	yes|down	2
gene1227	NFATC2	nuclear factor of activated T-cells, cytoplasmic, calcineurin-dependent 2, transcript variant X3	no|up	yes|down	yes|down	2
gene19734	LOC106049216	uncharacterized protein DDB_G0274171-like	no|down	yes|down	no|down	1
gene19735	LOC106049225	uncharacterized LOC106049225	no|up	yes|down	yes|down	2
gene19736	LOC106049223	scale keratin-like	yes|down	yes|down	no|up	2
gene15973	CCDC37	coiled-coil domain containing 37, transcript variant X1	yes|down	yes|down	no|up	2
gene19738	LOC106049220	feather keratin B-4-like	no|down	yes|down	no|down	1
gene19739	LOC106049217	scale keratin-like	no|down	yes|down	yes|down	2
gene968	NFKBIZ	nuclear factor of kappa light polypeptide gene enhancer in B-cells inhibitor, zeta, transcript variant X1	no|down	yes|down	yes|down	2
gene20855	ND1	NADH dehydrogenase subunit 1	yes|up	yes|up	no|down	2
gene966	NXPE3	neurexophilin and PC-esterase domain family, member 3, transcript variant X1	yes|down	yes|down	no|up	2
gene18285	NCAPH	non-SMC condensin I complex, subunit H	yes|down	yes|down	no|up	2
gene1165	WISP2	WNT1 inducible signaling pathway protein 2	yes|up	yes|up	no|up	2
gene1164	LOC106041081	P2Y purinoceptor 1-like	yes|down	yes|down	no|down	2
gene1169	TTPAL	tocopherol (alpha) transfer protein-like, transcript variant X1	yes|down	yes|down	no|down	2
gene1168	PKIG	protein kinase (cAMP-dependent, catalytic) inhibitor gamma, transcript variant X1	no|down	yes|down	no|down	1
gene9413	GRHL3	grainyhead-like 3 (Drosophila), transcript variant X2	yes|down	yes|down	no|down	2
gene9410	RCAN3	RCAN family member 3	no|down	yes|down	no|down	1
gene9415	IL22RA1	interleukin 22 receptor, alpha 1	yes|down	yes|down	no|down	2
gene9414	IFNLR1	interferon, lambda receptor 1	yes|down	yes|down	no|up	2
gene8943	PCDH11X	protocadherin 11 X-linked	yes|up	yes|up	no|up	2
gene9419	PNRC2	proline-rich nuclear receptor coactivator 2	yes|down	yes|down	no|down	2
gene563	DOK7	docking protein 7, transcript variant X4	yes|up	yes|up	no|up	2
gene2324	GPR1	G protein-coupled receptor 1, transcript variant X2	yes|up	yes|up	no|down	2
gene2327	ADAM23	ADAM metallopeptidase domain 23	yes|up	yes|up	no|down	2
gene6522	STXBP4	syntaxin binding protein 4, transcript variant X1	yes|up	yes|up	no|up	2
gene6524	TOM1L1	target of myb1 like 1 membrane trafficking protein, transcript variant X3	no|down	yes|down	no|down	1
gene17192	LOC106046449	uncharacterized LOC106046449, transcript variant X3	yes|up	yes|up	no|up	2
gene17191	UPF3A	UPF3 regulator of nonsense transcripts homolog A (yeast), transcript variant X1	no|up	yes|up	no|up	1
gene7177	BACH2	BTB and CNC homology 1, basic leucine zipper transcription factor 2, transcript variant X1	no|down	yes|down	no|down	1
gene18359	LOC106047730	methyltransferase-like protein 7A	yes|up	yes|up	no|up	2
gene18358	TMPRSS12	transmembrane (C-terminal) protease, serine 12, transcript variant X1	no|down	yes|up	no|up	1
gene12706	LOC106041503	linker for activation of T-cells family member 2-like	yes|down	yes|down	no|up	2
gene16822	LOC106046024	heparan sulfate glucosamine 3-O-sulfotransferase 4-like	no|down	yes|down	no|down	1
gene12700	LOC106041486	protein spinster homolog 3-like, transcript variant X2	yes|down	yes|down	no|down	2
gene12702	LOC106041472	protein spinster homolog 2	yes|up	yes|up	no|up	2
gene18351	GPD1	glycerol-3-phosphate dehydrogenase 1 (soluble)	no|up	yes|up	yes|up	2
gene13873	RGS14	regulator of G-protein signaling 14	yes|down	yes|down	no|down	2
gene18600	LOC106047979	keratin, type I cytoskeletal 14-like	yes|down	yes|down	no|down	2
gene12709	LOC106041524	uncharacterized LOC106041524	yes|up	yes|up	no|up	2
gene18356	DIP2B	disco-interacting protein 2 homolog B	no|down	yes|down	no|down	1
gene19862	SULT2B1	sulfotransferase family, cytosolic, 2B, member 1	no|down	yes|down	no|down	1
gene17993	STK32C	serine/threonine kinase 32C, transcript variant X1	no|down	yes|down	no|down	1
gene13479	SLCO2B1	solute carrier organic anion transporter family, member 2B1, transcript variant X1	no|up	yes|up	yes|up	2
gene1781	LRIG3	leucine-rich repeats and immunoglobulin-like domains 3, transcript variant X1	no|up	yes|up	no|up	1
gene12292	LOC106041040	C-C motif chemokine 5-like	yes|down	yes|down	no|up	2
gene15847	MAST3	microtubule associated serine/threonine kinase 3	no|down	yes|down	no|down	1
gene12290	LOC106041041	C-C motif chemokine 4 homolog	yes|down	yes|down	yes|down	3
gene12291	LOC106041042	C-C motif chemokine 4-like	no|down	yes|down	yes|down	2
gene12296	LOC106041043	1-acyl-sn-glycerol-3-phosphate acyltransferase alpha-like	yes|down	yes|down	no|down	2
gene15849	ARRDC2	arrestin domain containing 2, transcript variant X2	no|down	yes|down	yes|down	2
gene7318	CD36	CD36 molecule (thrombospondin receptor), transcript variant X6	no|up	yes|up	yes|up	2
gene3320	B3GNT4	UDP-GlcNAc:betaGal beta-1,3-N-acetylglucosaminyltransferase 4	yes|down	yes|down	no|down	2
gene3324	BCL7A	B-cell CLL/lymphoma 7A, transcript variant X1	no|down	yes|down	no|down	1
gene7312	MAGI2	membrane associated guanylate kinase, WW and PDZ domain containing 2	yes|up	yes|up	no|up	2
gene6562	LOC106034617	Na(+)/H(+) exchange regulatory cofactor NHE-RF1-like	yes|down	yes|down	no|up	2
gene2142	OBSL1	obscurin-like 1	no|up	yes|up	no|up	1
gene2144	LOC106029819	gap junction gamma-1 protein-like	no|down	yes|down	no|down	1
gene2146	SLC4A3	solute carrier family 4 (anion exchanger), member 3	no|down	yes|down	yes|down	2
gene6301	USP40	ubiquitin specific peptidase 40, transcript variant X2	yes|down	yes|down	no|up	2
gene1439	SPI1	Spi-1 proto-oncogene	yes|down	yes|down	no|down	2
gene5643	ADAM10	ADAM metallopeptidase domain 10	no|down	yes|down	no|down	1
gene5647	CCNB2	cyclin B2	yes|down	yes|down	no|up	2
gene5649	FAM81A	family with sequence similarity 81, member A, transcript variant X2	yes|up	yes|up	no|up	2
gene3145	SLC6A12	solute carrier family 6 (neurotransmitter transporter), member 12	yes|down	yes|down	no|down	2
gene16645	CCND3	cyclin D3	yes|down	yes|down	no|up	2
gene16641	LOC106045866	acidic mammalian chitinase-like	no|down	yes|down	yes|down	2
gene16642	LOC106045865	acidic mammalian chitinase-like	no|down	yes|down	yes|down	2
gene14861	BPHL	biphenyl hydrolase-like (serine hydrolase)	no|up	yes|up	no|up	1
gene14865	SLC22A23	solute carrier family 22, member 23	no|down	yes|down	no|down	1
gene15592	PRDM16	PR domain containing 16, transcript variant X1	yes|up	yes|up	no|up	2
gene1239	TSHZ2	teashirt zinc finger homeobox 2, transcript variant X1	yes|up	yes|up	no|down	2
gene11031	DPY19L3	dpy-19-like 3 (C. elegans), transcript variant X2	no|up	yes|up	no|up	1
gene11034	LOC106039631	cubilin-like	no|up	yes|down	yes|down	2
gene4664	LIN28B	lin-28 homolog B (C. elegans)	no|down	yes|down	no|down	1
gene3275	CORO1C	coronin, actin binding protein, 1C	yes|down	yes|down	no|up	2
gene1942	SRD5A2	steroid-5-alpha-reductase, alpha polypeptide 2 (3-oxo-5 alpha-steroid delta 4-dehydrogenase alpha 2), transcript variant X1	no|down	yes|up	yes|up	2
gene5420	MPV17L	MPV17 mitochondrial membrane protein-like	yes|down	yes|down	no|up	2
gene7498	ZBED1	zinc finger, BED-type containing 1	no|down	yes|down	yes|down	2
gene14249	LOC106043214	uncharacterized LOC106043214	yes|down	yes|down	no|down	2
gene14247	ATP6V1B1	ATPase, H+ transporting, lysosomal 56/58kDa, V1 subunit B1	yes|down	yes|down	no|up	2
gene7497	DHRSX	dehydrogenase/reductase (SDR family) X-linked	no|up	yes|up	no|up	1
gene7491	P2RY8	purinergic receptor P2Y, G-protein coupled, 8, transcript variant X3	yes|down	yes|down	no|up	2
gene20066	LOC106049570	keratin, type I cytoskeletal 15-like	yes|down	yes|down	no|up	2
gene20067	KRT23	keratin 23, type I	yes|down	yes|down	no|down	2
gene20068	KRT20	keratin 20, type I	no|down	yes|down	no|down	1
gene20069	LOC106049573	keratin, type I cytoskeletal 12-like	yes|down	yes|down	no|down	2
gene20718	LOC106029585	uncharacterized LOC106029585	no|down	yes|down	no|down	1
gene3958	TRIM8	tripartite motif containing 8	no|down	yes|down	yes|down	2
gene4279	HAGH	hydroxyacylglutathione hydrolase, transcript variant X2	no|up	yes|up	no|up	1
gene11699	FGF9	fibroblast growth factor 9	no|up	yes|up	no|up	1
gene4274	LOC106032135	mesothelin-like	yes|down	yes|down	no|down	2
gene11690	SGCG	sarcoglycan, gamma (35kDa dystrophin-associated glycoprotein), transcript variant X2	yes|up	yes|up	no|up	2
gene8775	DACT1	dishevelled-binding antagonist of beta-catenin 1	no|up	yes|up	no|up	1
gene19256	AQP5	aquaporin 5	no|down	yes|down	no|up	1
gene11749	ZNF462	zinc finger protein 462	no|up	yes|up	no|up	1
gene11745	KLF4	Kruppel-like factor 4 (gut)	no|up	yes|down	yes|down	2
gene10348	INSIG1	insulin induced gene 1	yes|up	yes|up	no|up	2
gene11741	LMNB1	lamin B1, transcript variant X1	yes|down	yes|down	no|up	2
gene10619	IGF2BP2	insulin-like growth factor 2 mRNA binding protein 2, transcript variant X1	yes|down	yes|down	no|down	2
gene19259	LOC106048707	uncharacterized LOC106048707, transcript variant X1	yes|down	yes|down	no|up	2
gene19258	SLC4A8	solute carrier family 4, sodium bicarbonate cotransporter, member 8, transcript variant X1	no|down	yes|down	no|down	1
gene17347	PMFBP1	polyamine modulated factor 1 binding protein 1, transcript variant X1	yes|down	yes|down	no|down	2
gene10169	LOC106038763	carboxypeptidase A2-like, transcript variant X1	no|down	yes|down	no|down	1
gene3658	LOC106031513	uncharacterized LOC106031513	no|down	yes|up	no|up	1
gene11964	CARD9	caspase recruitment domain family, member 9, transcript variant X1	no|down	yes|down	no|down	1
gene11968	LOC106040650	centrosome-associated protein 350	no|down	yes|down	no|down	1
gene18035	LOC106047378	uncharacterized LOC106047378, transcript variant X2	no|up	yes|up	no|up	1
gene17741	LOC106047072	protein-L-isoaspartate(D-aspartate) O-methyltransferase-like, transcript variant X2	no|up	yes|up	no|up	1
gene18037	WDR35	WD repeat domain 35	yes|up	yes|up	no|down	2
gene1237	LOC106041673	uncharacterized LOC106041673, transcript variant X1	yes|down	yes|down	no|down	2
gene4899	SGCD	sarcoglycan, delta (35kDa dystrophin-associated glycoprotein), transcript variant X1	no|up	yes|up	no|up	1
gene978	CBLB	Cbl proto-oncogene B, E3 ubiquitin protein ligase	no|down	yes|down	yes|down	2
gene4897	LOC106032849	uncharacterized LOC106032849	yes|down	yes|down	no|down	2
gene20840	LOC106029714	class II histocompatibility antigen, B-L beta chain-like	yes|down	yes|down	no|down	2
gene20844	LOC106029718	fatty acid-binding protein, heart-like	no|up	yes|up	no|up	1
gene18290	ANTXR1	anthrax toxin receptor 1	yes|up	yes|up	no|up	2
gene18291	GKN1	gastrokine 1	no|down	yes|down	no|down	1
gene20848	LOC106029722	bromodomain-containing protein 2-like	no|down	yes|down	no|down	1
gene18293	GKN2	gastrokine 2	yes|down	yes|down	no|down	2
gene18295	ARHGAP25	Rho GTPase activating protein 25	yes|down	yes|down	no|up	2
gene18296	CDS2	CDP-diacylglycerol synthase (phosphatidate cytidylyltransferase) 2	yes|up	yes|up	yes|up	3
gene1157	STK4	serine/threonine kinase 4	no|down	yes|down	no|down	1
gene1155	MATN4	matrilin 4	yes|down	yes|down	no|up	2
gene9137	TTC39C	tetratricopeptide repeat domain 39C, transcript variant X1	no|down	yes|down	no|down	1
gene8959	TNMD	tenomodulin	no|up	yes|down	no|down	1
gene8958	PCDH19	protocadherin 19	no|up	yes|down	yes|down	2
gene572	CPZ	carboxypeptidase Z	no|up	yes|down	yes|down	2
gene576	ACOX3	acyl-CoA oxidase 3, pristanoyl, transcript variant X3	no|up	yes|up	yes|up	2
gene16349	PDE1C	phosphodiesterase 1C, calmodulin-dependent 70kDa, transcript variant X1	yes|up	yes|up	no|up	2
gene2447	HOXA2	homeobox A2	yes|down	yes|down	no|down	2
gene601	EVC2	Ellis van Creveld syndrome 2, transcript variant X1	no|up	yes|up	yes|up	2
gene16342	FKBP9	FK506 binding protein 9, 63 kDa	yes|up	yes|up	no|up	2
gene16832	LOC106046046	interleukin-9 receptor-like, transcript variant X1	yes|down	yes|down	no|down	2
gene17529	NBEAL2	neurobeachin-like 2	yes|down	yes|down	no|up	2
gene16831	IL21R	interleukin 21 receptor, transcript variant X4	yes|down	yes|down	no|down	2
gene18619	LOC106047988	uncharacterized LOC106047988	yes|down	yes|down	no|down	2
gene13649	TLR7	toll-like receptor 7, transcript variant X1	yes|down	yes|down	no|up	2
gene17522	LOC106046814	GTPase IMAP family member 2-like	yes|down	yes|down	no|up	2
gene13860	BOD1	biorientation of chromosomes in cell division 1	yes|down	yes|down	no|up	2
gene18341	ENDOU	endonuclease, polyU-specific	yes|down	yes|down	no|down	2
gene13867	KIF20A	kinesin family member 20A	yes|down	yes|down	no|up	2
gene18344	LOC106047723	twist-related protein 2-like	yes|down	yes|down	no|up	2
gene12117	MTG2	mitochondrial ribosome-associated GTPase 2	no|down	yes|down	no|down	1
gene12116	HRH3	histamine receptor H3	yes|down	yes|down	no|down	2
gene16124	HSPA12A	heat shock 70kDa protein 12A, transcript variant X1	no|up	yes|up	yes|up	2
gene19817	ABHD12B	abhydrolase domain containing 12B	yes|up	yes|up	yes|up	3
gene16122	SHTN1	shootin 1, transcript variant X1	yes|down	yes|down	no|down	2
gene5863	LOC106033854	vitamin D 25-hydroxylase	no|down	yes|down	no|down	1
gene15688	MGME1	mitochondrial genome maintenance exonuclease 1, transcript variant X3	yes|down	yes|down	no|down	2
gene12594	ETNK2	ethanolamine kinase 2	no|down	yes|down	yes|down	2
gene12597	RTN4RL1	reticulon 4 receptor-like 1	yes|up	yes|up	no|up	2
gene12596	DPH1	diphthamide biosynthesis 1	no|down	yes|down	yes|down	2
gene12591	PLEKHA6	pleckstrin homology domain containing, family A member 6	no|down	yes|down	yes|down	2
gene12590	PPP1R15B	protein phosphatase 1, regulatory subunit 15B	no|down	yes|down	no|down	1
gene12593	REN	renin, transcript variant X1	no|down	yes|down	no|down	1
gene2158	GCG	glucagon	no|down	yes|down	no|down	1
gene3313	KNTC1	kinetochore associated 1	yes|down	yes|down	no|down	2
gene2150	ITGB6	integrin, beta 6, transcript variant X4	no|up	yes|down	yes|down	2
gene7301	LRRC17	leucine rich repeat containing 17	no|up	yes|up	no|up	1
gene7300	FBXL13	F-box and leucine-rich repeat protein 13	yes|up	yes|up	no|down	2
gene7302	FAM185A	family with sequence similarity 185, member A	yes|up	yes|up	no|down	2
gene17831	KIAA1755	KIAA1755 ortholog	no|down	yes|down	yes|down	2
gene6310	ARL4C	ADP-ribosylation factor-like 4C	no|up	yes|down	yes|down	2
gene579	ABLIM2	actin binding LIM protein family, member 2, transcript variant X1	yes|up	yes|up	no|up	2
gene3796	TMEM229B	transmembrane protein 229B, transcript variant X9	yes|down	yes|down	no|up	2
gene14479	HUNK	hormonally up-regulated Neu-associated kinase	yes|up	yes|up	no|down	2
gene3179	FAM180A	family with sequence similarity 180, member A	no|up	yes|up	no|up	1
gene5650	LOC106033710	uncharacterized LOC106033710, transcript variant X1	yes|down	yes|down	no|up	2
gene3172	PKP2	plakophilin 2	yes|up	yes|up	no|down	2
gene4787	PITX1	paired-like homeodomain 1	no|down	yes|down	no|down	1
gene14477	MIS18A	MIS18 kinetochore protein A	yes|down	yes|down	no|up	2
gene15479	PTPRZ1	protein tyrosine phosphatase, receptor-type, Z polypeptide 1	yes|down	yes|down	no|up	2
gene15478	FAM3C	family with sequence similarity 3, member C	no|up	yes|up	no|up	1
gene15475	CPED1	cadherin-like and PC-esterase domain containing 1, transcript variant X1	yes|up	yes|up	no|up	2
gene15470	KCND2	potassium channel, voltage gated Shal related subfamily D, member 2	yes|up	yes|up	no|up	2
gene16654	MDFI	MyoD family inhibitor	no|up	yes|up	yes|up	2
gene19203	RCCD1	RCC1 domain containing 1	no|down	yes|down	no|down	1
gene16658	LOC106045892	triggering receptor expressed on myeloid cells 2-like	no|up	yes|up	no|up	1
gene15871	KLF2	Kruppel-like factor 2	no|down	yes|down	yes|down	2
gene15877	LOC106044980	uncharacterized LOC106044980, transcript variant X2	yes|down	yes|down	no|down	2
gene14658	UACA	uveal autoantigen with coiled-coil domains and ankyrin repeats, transcript variant X1	yes|up	yes|up	no|down	2
gene606	MSX1	msh homeobox 1	no|down	yes|down	no|down	1
gene600	EVC	Ellis van Creveld protein	yes|up	yes|up	no|up	2
gene2336	LOC106030093	uncharacterized LOC106030093	no|down	yes|down	no|down	1
gene5782	KIF18A	kinesin family member 18A	yes|down	yes|down	no|up	2
gene4653	PRDM1	PR domain containing 1, with ZNF domain, transcript variant X1	yes|down	yes|down	no|down	2
gene4651	AIM1	absent in melanoma 1	yes|down	yes|down	no|down	2
gene20275	LOC106049783	intercellular adhesion molecule 5-like	no|down	yes|down	yes|down	2
gene20279	LOC106049785	collagen alpha-1(XI) chain-like	yes|up	yes|up	no|up	2
gene1932	KIF26B	kinesin family member 26B	no|up	yes|down	yes|down	2
gene5436	XYLT1	xylosyltransferase I, transcript variant X1	yes|up	yes|up	no|down	2
gene5431	LOC106033455	multidrug resistance-associated protein 6-like	no|up	yes|up	yes|up	2
gene15308	GPR141	G protein-coupled receptor 141	yes|down	yes|down	no|up	2
gene2944	ATP6V1C2	ATPase, H+ transporting, lysosomal 42kDa, V1 subunit C2, transcript variant X1	yes|down	yes|down	no|down	2
gene14255	CPXM1	carboxypeptidase X (M14 family), member 1	yes|up	yes|up	no|up	2
gene7467	NIPA1	non imprinted in Prader-Willi/Angelman syndrome 1	no|up	yes|up	yes|up	2
gene15301	EEPD1	endonuclease/exonuclease/phosphatase family domain containing 1	yes|up	yes|up	no|up	2
gene15303	ANLN	anillin actin binding protein	yes|down	yes|down	no|down	2
gene15302	KIAA0895	KIAA0895 ortholog, transcript variant X1	yes|up	yes|up	no|up	2
gene15304	AOAH	acyloxyacyl hydrolase (neutrophil), transcript variant X1	yes|down	yes|down	no|down	2
gene20014	FGFR4	fibroblast growth factor receptor 4	no|down	yes|down	no|down	1
gene20011	LOC106049507	hexokinase-3-like	no|down	yes|down	no|down	1
gene20013	ZNF346	zinc finger protein 346	no|down	yes|down	no|down	1
gene20018	LOC106049512	protein FAM193B-like	no|down	yes|down	no|down	1
gene20727	LOC106029595	basic salivary proline-rich protein 2-like	yes|down	yes|down	no|up	2
gene9309	MTCP1	mature T-cell proliferation 1, transcript variant X1	yes|up	yes|up	no|up	2
gene11687	TNFRSF19	tumor necrosis factor receptor superfamily, member 19, transcript variant X3	no|up	yes|up	no|up	1
gene11688	LOC106040364	uncharacterized LOC106040364	yes|up	yes|up	no|up	2
gene4266	LMF1	lipase maturation factor 1	yes|up	yes|up	no|up	2
gene9302	LOC106037716	probable G-protein coupled receptor 34, transcript variant X1	yes|down	yes|down	no|up	2
gene9300	TMEM35	transmembrane protein 35	yes|down	yes|down	no|down	2
gene19240	LOC106048701	keratin, type II cytoskeletal 5-like	no|down	yes|down	no|down	1
gene19242	LOC106048696	keratin, type II cytoskeletal 6C-like	yes|down	yes|down	no|down	2
gene19243	LOC106048705	uncharacterized LOC106048705	no|down	yes|down	no|down	1
gene19244	LOC106048702	keratin, type II cytoskeletal 5-like	no|down	yes|down	no|down	1
gene19245	LOC106048703	keratin, type II cytoskeletal 5-like	no|down	yes|down	no|down	1
gene19246	LOC106048699	keratin, type II cytoskeletal 5-like	no|down	yes|down	no|down	1
gene11205	LOC106039769	apolipoprotein A-I	yes|up	yes|up	no|down	2
gene17686	TRAF3	TNF receptor-associated factor 3, transcript variant X3	yes|down	yes|down	no|down	2
gene17687	LOC106047000	uncharacterized LOC106047000	no|down	yes|down	no|down	1
gene10402	HTRA1	HtrA serine peptidase 1, transcript variant X1	yes|up	yes|up	no|up	2
gene17682	EXOC3L4	exocyst complex component 3-like 4, transcript variant X1	no|down	yes|down	no|down	1
gene10159	LEF1	lymphoid enhancer-binding factor 1, transcript variant X1	yes|down	yes|down	no|up	2
gene10408	LOC106038930	disintegrin and metalloproteinase domain-containing protein 9-like	no|down	yes|down	no|down	1
gene17689	RCOR1	REST corepressor 1	yes|down	yes|down	no|down	2
gene11973	NACC2	NACC family member 2, BEN and BTB (POZ) domain containing	yes|up	yes|up	no|down	2
gene17753	LOC106047053	chromosome unknown open reading frame, human C15orf52, transcript variant X2	no|up	yes|up	yes|up	2
gene18090	SNX22	sorting nexin 22, transcript variant X1	yes|down	yes|down	no|up	2
gene1204	B4GALT5	UDP-Gal:betaGlcNAc beta 1,4- galactosyltransferase, polypeptide 5	no|down	yes|down	yes|down	2
gene19020	CDKN1A	cyclin-dependent kinase inhibitor 1A (p21, Cip1)	no|down	yes|down	yes|down	2
gene19021	RAB44	RAB44, member RAS oncogene family, transcript variant X1	yes|down	yes|down	no|up	2
gene1200	LOC106041390	uncharacterized LOC106041390	yes|down	yes|down	no|up	2
gene19023	PI16	peptidase inhibitor 16, transcript variant X1	yes|up	yes|up	no|up	2
gene7689	ANKS6	ankyrin repeat and sterile alpha motif domain containing 6	yes|up	yes|up	no|up	2
gene7686	IRX1	iroquois homeobox 1	no|up	yes|up	no|up	1
gene4881	GRIA1	glutamate receptor, ionotropic, AMPA 1, transcript variant X1	no|up	yes|up	no|up	1
gene4884	LOC106032703	uncharacterized LOC106032703	no|down	yes|down	no|down	1
gene1149	RALY	RALY heterogeneous nuclear ribonucleoprotein	yes|down	yes|down	no|down	2
gene13985	POC5	POC5 centriolar protein, transcript variant X1	yes|down	yes|down	no|down	2
gene13981	STK17A	serine/threonine kinase 17a	yes|down	yes|down	no|down	2
gene4355	DCHS2	dachsous cadherin-related 2, transcript variant X1	no|up	yes|up	no|up	1
gene9431	MYCL	v-myc avian myelocytomatosis viral oncogene lung carcinoma derived homolog	no|down	yes|down	no|down	1
gene9430	MFSD2A	major facilitator superfamily domain containing 2A	yes|down	yes|down	yes|down	3
gene9433	LOC106037880	protein FAM49B-like	yes|down	yes|down	no|up	2
gene10889	GLMN	glomulin, FKBP associated protein, transcript variant X1	no|down	yes|down	no|down	1
gene8439	WNT3A	wingless-type MMTV integration site family, member 3A, transcript variant X1	no|down	yes|down	no|down	1
gene18192	ALKBH8	alkB homolog 8, tRNA methyltransferase, transcript variant X2	no|up	yes|up	yes|up	2
gene17352	ZNF821	zinc finger protein 821, transcript variant X1	yes|down	yes|down	no|down	2
gene18196	RAB39A	RAB39A, member RAS oncogene family	yes|down	yes|down	no|down	2
gene18195	SLC35F2	solute carrier family 35, member F2, transcript variant X2	no|down	yes|down	no|down	1
gene15262	RNF223	ring finger protein 223	yes|down	yes|down	no|down	2
gene16335	NOBOX	NOBOX oogenesis homeobox, transcript variant X1	no|down	yes|down	yes|down	2
gene16336	CD9	CD9 molecule	no|down	yes|down	yes|down	2
gene2309	LOC106029848	cytochrome P450 20A1	no|up	yes|up	no|up	1
gene13186	LSMEM1	leucine-rich single-pass membrane protein 1	no|up	yes|up	no|up	1
gene13863	LOC106042779	neuron-specific protein family member 2	yes|up	yes|up	no|up	2
gene12858	IL1R2	interleukin 1 receptor, type II, transcript variant X1	no|down	yes|down	no|down	1
gene18617	ZNF385C	zinc finger protein 385C, transcript variant X3	no|up	yes|up	yes|up	2
gene12853	IL18R1	interleukin 18 receptor 1	yes|down	yes|down	no|up	2
gene12856	LOC106041678	interleukin-1 receptor type 1-like, transcript variant X3	no|down	yes|down	no|down	1
gene18347	RACGAP1	Rac GTPase activating protein 1, transcript variant X2	yes|down	yes|down	no|up	2
gene16804	RBBP6	retinoblastoma binding protein 6	no|down	yes|down	no|down	1
gene16803	CACNG3	calcium channel, voltage-dependent, gamma subunit 3	no|down	yes|down	no|down	1
gene13864	MSX2	msh homeobox 2	no|down	yes|down	no|down	1
gene16801	PRKCB	protein kinase C, beta, transcript variant X1	yes|down	yes|down	no|up	2
gene18374	LMBR1L	limb development membrane protein 1-like	no|down	yes|down	no|down	1
gene13852	DUSP1	dual specificity phosphatase 1	no|down	yes|down	yes|down	2
gene13850	SH3PXD2B	SH3 and PX domains 2B, transcript variant X1	yes|up	yes|up	no|up	2
gene16481	LOC106045665	uncharacterized LOC106045665	no|down	yes|down	no|down	1
gene12101	OGFR	opioid growth factor receptor, transcript variant X1	yes|down	yes|down	no|down	2
gene16487	LOC106045683	mucosa-associated lymphoid tissue lymphoma translocation protein 1-like, transcript variant X1	yes|down	yes|down	no|up	2
gene16484	MATK	megakaryocyte-associated tyrosine kinase, transcript variant X1	yes|down	yes|down	yes|down	3
gene13451	EPB41L4A	erythrocyte membrane protein band 4.1 like 4A	no|up	yes|up	no|up	1
gene13457	CAMK4	calcium/calmodulin-dependent protein kinase IV, transcript variant X1	no|up	yes|up	no|up	1
gene13456	STARD4	StAR-related lipid transfer (START) domain containing 4	yes|down	yes|down	no|down	2
gene6499	SUZ12	SUZ12 polycomb repressive complex 2 subunit	no|down	yes|down	no|down	1
gene12586	NFASC	neurofascin, transcript variant X4	yes|up	yes|up	no|up	2
gene12585	CNTN2	contactin 2 (axonal)	yes|up	yes|up	no|down	2
gene12580	NUAK2	NUAK family, SNF1-like kinase, 2	no|up	yes|up	no|up	1
gene6495	RNF135	ring finger protein 135	yes|down	yes|down	no|up	2
gene3558	LOC106031351	dynein light chain 1, cytoplasmic, transcript variant X3	yes|down	yes|down	no|down	2
gene10203	PLXNA4	plexin A4, transcript variant X1	no|up	yes|up	no|up	1
gene3301	FAM109A	family with sequence similarity 109, member A, transcript variant X2	yes|down	yes|down	no|down	2
gene4460	TBC1D32	TBC1 domain family, member 32, transcript variant X1	no|up	yes|up	no|up	1
gene4465	LOC106032464	uncharacterized LOC106032464, transcript variant X3	no|up	yes|up	no|up	1
gene3307	TCTN1	tectonic family member 1	no|up	yes|up	no|up	1
gene2523	OXSM	3-oxoacyl-ACP synthase, mitochondrial, transcript variant X1	no|up	yes|up	no|up	1
gene15689	OVOL2	ovo-like zinc finger 2	yes|down	yes|down	no|down	2
gene2167	FIGN	fidgetin, transcript variant X1	yes|up	yes|up	no|up	2
gene10361	DNAJB6	DnaJ (Hsp40) homolog, subfamily B, member 6, transcript variant X2	no|down	yes|down	yes|down	2
gene15680	SYNDIG1	synapse differentiation inducing 1, transcript variant X1	yes|up	yes|up	no|up	2
gene15683	LOC106044772	cystatin-like	yes|up	yes|up	no|up	2
gene14207	FOXN2	forkhead box N2, transcript variant X2	no|down	yes|down	no|down	1
gene3782	GALNT16	polypeptide N-acetylgalactosaminyltransferase 16, transcript variant X2	yes|up	yes|up	no|down	2
gene3789	ZFP36L1	ZFP36 ring finger protein-like 1	no|down	yes|down	yes|down	2
gene14409	LOC106043362	lamin-L(III)-like, transcript variant X1	no|up	yes|up	no|up	1
gene4795	LOC106032655	leukocyte cell-derived chemotaxin-2-like	yes|down	yes|down	no|up	2
gene4794	LOC106032697	myeloid protein 1	yes|down	yes|down	no|up	2
gene16668	TMEM9	transmembrane protein 9, transcript variant X1	no|up	yes|up	no|up	1
gene16663	ADORA1	adenosine A1 receptor	no|up	yes|up	no|up	1
gene16660	DENND2D	DENN/MADD domain containing 2D	yes|down	yes|down	no|up	2
gene16667	LOC106045877	alpha-1,3-mannosyl-glycoprotein 4-beta-N-acetylglucosaminyltransferase C-like, transcript variant X4	yes|down	yes|down	no|up	2
gene15867	LOC106044968	uncharacterized LOC106044968	no|down	yes|down	no|down	1
gene15860	SIN3B	SIN3 transcription regulator family member B	no|up	yes|up	no|up	1
gene7519	IGF1	insulin-like growth factor 1 (somatomedin C)	yes|up	yes|up	no|up	2
gene4645	SOBP	sine oculis binding protein homolog, transcript variant X1	yes|up	yes|up	no|down	2
gene7515	NUP37	nucleoporin 37kDa	no|up	yes|up	no|up	1
gene7516	PARPBP	PARP1 binding protein, transcript variant X1	no|up	yes|up	no|up	1
gene20267	TPP1	tripeptidyl peptidase I	yes|up	yes|up	no|down	2
gene6100	KATNA1	katanin p60 (ATPase containing) subunit A 1	yes|down	yes|down	no|down	2
gene6107	LOC106034274	uncharacterized LOC106034274, transcript variant X2	yes|down	yes|down	no|down	2
gene20481	LOC106029344	C-type lectin domain family 2 member D-like	yes|down	yes|down	no|down	2
gene1922	ZBTB18	zinc finger and BTB domain containing 18, transcript variant X1	no|down	yes|down	no|down	1
gene18979	RFX2	regulatory factor X, 2 (influences HLA class II expression)	no|up	yes|down	yes|down	2
gene14227	FBXO41	F-box protein 41, transcript variant X1	no|down	yes|down	yes|down	2
gene7477	GTPBP6	GTP binding protein 6 (putative)	no|up	yes|up	no|up	1
gene7476	PLCXD1	phosphatidylinositol-specific phospholipase C, X domain containing 1, transcript variant X4	yes|down	yes|down	no|down	2
gene7475	LOC106035673	regucalcin-like, transcript variant X1	yes|down	yes|down	no|down	2
gene18971	ZNF414	zinc finger protein 414	no|up	yes|up	no|up	1
gene18970	MYO1F	myosin IF, transcript variant X1	yes|down	yes|down	no|down	2
gene2959	FAM84A	family with sequence similarity 84, member A	yes|down	yes|down	no|up	2
gene18974	ACER1	alkaline ceramidase 1	yes|down	yes|down	no|up	2
gene18977	ACSBG2	acyl-CoA synthetase bubblegum family member 2, transcript variant X1	no|up	yes|down	yes|down	2
gene20004	LOC106049496	PR domain zinc finger protein 5-like, transcript variant X3	no|up	yes|up	no|up	1
gene20002	TNIP3	TNFAIP3 interacting protein 3, transcript variant X1	yes|down	yes|down	no|up	2
gene20003	NDNF	neuron-derived neurotrophic factor, transcript variant X1	yes|down	yes|down	no|up	2
gene13528	ACER3	alkaline ceramidase 3, transcript variant X1	yes|up	yes|up	no|up	2
gene5173	E2F4	E2F transcription factor 4, p107/p130-binding	yes|down	yes|down	no|up	2
gene20730	LOC106029598	elastin-like	no|up	yes|down	yes|down	2
gene4253	SLC5A10	solute carrier family 5 (sodium/sugar cotransporter), member 10, transcript variant X1	yes|down	yes|down	no|up	2
gene4250	SHMT1	serine hydroxymethyltransferase 1 (soluble)	yes|down	yes|down	no|up	2
gene4257	CACNA1H	calcium channel, voltage-dependent, T type, alpha 1H subunit, transcript variant X1	yes|up	yes|up	no|up	2
gene4254	FAM83G	family with sequence similarity 83, member G	no|down	yes|down	no|down	1
gene9335	S100G	S100 calcium binding protein G	no|down	yes|down	no|up	1
gene3979	OBFC1	oligonucleotide/oligosaccharide-binding fold containing 1, transcript variant X3	no|up	yes|up	no|up	1
gene19238	LOC106048695	uncharacterized LOC106048695	no|down	yes|down	no|down	1
gene19235	LOC106048694	keratin, type II cytoskeletal 3-like	no|down	yes|down	no|down	1
gene19234	LOC106048691	keratin, type II cytoskeletal 4-like, transcript variant X1	yes|down	yes|down	no|up	2
gene19237	LOC106048678	keratin, type II cytoskeletal 5-like	no|down	yes|down	no|down	1
gene10366	NCAPG2	non-SMC condensin II complex, subunit G2, transcript variant X4	yes|down	yes|down	no|up	2
gene11764	NRG1	neuregulin 1, transcript variant X3	yes|up	yes|up	no|down	2
gene11943	LOC106040633	uncharacterized LOC106040633, transcript variant X1	yes|down	yes|down	no|up	2
gene11942	ATP12A	ATPase, H+/K+ transporting, nongastric, alpha polypeptide	no|down	yes|down	no|down	1
gene11416	CNBP	CCHC-type zinc finger, nucleic acid binding protein, transcript variant X1	no|down	yes|down	no|down	1
gene1213	LOC106041525	uncharacterized LOC106041525, transcript variant X1	no|down	yes|down	no|down	1
gene19587	VPS45	vacuolar protein sorting 45 homolog (S. cerevisiae), transcript variant X1	no|down	yes|down	no|down	1
gene1214	PTPN1	protein tyrosine phosphatase, non-receptor type 1	no|down	yes|down	no|down	1
gene10098	MAD2L1	MAD2 mitotic arrest deficient-like 1 (yeast)	yes|down	yes|down	no|up	2
gene19589	PLEKHO1	pleckstrin homology domain containing, family O member 1	yes|down	yes|down	no|down	2
gene19588	LOC106049066	uncharacterized LOC106049066	no|down	yes|down	no|down	1
gene10093	LOC106038686	PR domain zinc finger protein 5-like, transcript variant X1	no|up	yes|up	no|up	1
gene7691	GABBR2	gamma-aminobutyric acid (GABA) B receptor, 2, transcript variant X1	no|up	yes|up	no|up	1
gene910	CCDC80	coiled-coil domain containing 80	yes|up	yes|up	no|up	2
gene914	SLC19A2	solute carrier family 19 (thiamine transporter), member 2	no|down	yes|down	no|down	1
gene9845	KIAA1143	KIAA1143 ortholog	no|up	yes|up	no|up	1
gene9846	KIF15	kinesin family member 15	yes|down	yes|down	no|up	2
gene20863	ND4L	NADH dehydrogenase subunit 4L	no|up	yes|up	no|up	1
gene20864	ND4	NADH dehydrogenase subunit 4	no|up	yes|up	no|up	1
gene13994	LOC106042924	uncharacterized LOC106042924	yes|down	yes|down	no|up	2
gene1130	LIPI	lipase, member I	yes|down	yes|down	no|down	2
gene13993	GCNT4	glucosaminyl (N-acetyl) transferase 4, core 2, transcript variant X2	yes|down	yes|down	no|up	2
gene1133	SAMSN1	SAM domain, SH3 domain and nuclear localization signals 1	yes|down	yes|down	no|up	2
gene5120	FA2H	fatty acid 2-hydroxylase	yes|down	yes|down	no|down	2
gene10892	EPHX4	epoxide hydrolase 4	yes|up	yes|up	no|up	2
gene9449	LOC106038077	uncharacterized LOC106038077	no|down	yes|down	no|down	1
gene9444	RNF19B	ring finger protein 19B	no|down	yes|down	yes|down	2
gene9110	CLUL1	clusterin-like 1 (retinal)	no|up	yes|up	no|up	1
gene9447	FNDC5	fibronectin type III domain containing 5, transcript variant X1	no|down	yes|down	no|down	1
gene700	RBPJ	recombination signal binding protein for immunoglobulin kappa J region, transcript variant X1	yes|up	yes|up	no|down	2
gene8421	LOC106036766	leucine zipper putative tumor suppressor 3, transcript variant X2	yes|up	yes|up	no|up	2
gene8425	LOC106036744	chromosome unknown open reading frame, human C20orf194	no|up	yes|up	no|up	1
gene8424	SLC4A11	solute carrier family 4, sodium borate transporter, member 11, transcript variant X1	yes|down	yes|down	no|up	2
gene17324	LOC106046593	cadherin-3-like	no|down	yes|down	no|down	1
gene17323	LOC106046592	cadherin-1-like	yes|down	yes|down	no|down	2
gene12020	OLFML2A	olfactomedin-like 2A	no|up	yes|up	no|up	1
gene16327	PYROXD1	pyridine nucleotide-disulphide oxidoreductase domain 1	yes|up	yes|up	no|up	2
gene16324	BCAT1	branched chain amino-acid transaminase 1, cytosolic, transcript variant X1	no|down	yes|down	yes|down	2
gene17468	CYTH1	cytohesin 1	no|down	yes|down	no|down	1
gene16320	SOX5	SRY (sex determining region Y)-box 5	yes|up	yes|up	no|down	2
gene13196	FOXP2	forkhead box P2	yes|up	yes|up	no|down	2
gene1681	LOC106046673	glioma pathogenesis-related protein 1-like	yes|down	yes|down	no|down	2
gene1684	CAPS2	calcyphosine 2, transcript variant X3	yes|up	yes|up	no|up	2
gene17814	LOC106047154	uncharacterized LOC106047154	no|down	yes|down	no|down	1
gene16810	PLK1	polo-like kinase 1	yes|down	yes|down	no|up	2
gene13146	NAMPT	nicotinamide phosphoribosyltransferase, transcript variant X1	no|down	yes|down	no|down	1
gene12821	GCC2	GRIP and coiled-coil domain containing 2	yes|up	yes|up	no|up	2
gene16816	SCNN1B	sodium channel, non voltage gated 1 beta subunit	yes|up	yes|up	no|up	2
gene13840	HBEGF	heparin-binding EGF-like growth factor	yes|down	yes|down	yes|down	3
gene13665	LOC106042544	protein WWC3-like	yes|up	yes|up	no|down	2
gene18365	ATG101	autophagy related 101	no|down	yes|down	yes|down	2
gene19763	GINS2	GINS complex subunit 2 (Psf2 homolog)	yes|down	yes|down	no|up	2
gene19767	IRF8	interferon regulatory factor 8	yes|down	yes|down	no|down	2
gene13669	GPR143	G protein-coupled receptor 143	no|down	yes|down	no|down	1
gene16496	MFSD12	major facilitator superfamily domain containing 12, transcript variant X1	no|down	yes|down	yes|down	2
gene12131	EDN3	endothelin 3	yes|down	yes|down	no|up	2
gene17466	USP36	ubiquitin specific peptidase 36	no|down	yes|down	no|down	1
gene13447	DACH1	dachshund family transcription factor 1	no|up	yes|up	no|up	1
gene16499	FZR1	fizzy/cell division cycle 20 related 1	no|down	yes|down	no|down	1
gene17512	CDC25A	cell division cycle 25A	yes|down	yes|down	no|up	2
gene2791	LOC106030559	uncharacterized LOC106030559, transcript variant X1	yes|up	yes|up	no|up	2
gene6489	LOC106034685	sterile alpha motif domain-containing protein 9-like, transcript variant X1	no|down	yes|down	no|down	1
gene6488	ERN1	endoplasmic reticulum to nucleus signaling 1	no|down	yes|down	no|down	1
gene6487	TEX2	testis expressed 2	yes|up	yes|up	no|up	2
gene2313	CD28	CD28 molecule	yes|down	yes|down	no|up	2
gene2315	LOC106030066	inducible T-cell costimulator-like	yes|down	yes|down	no|up	2
gene2314	CTLA4	cytotoxic T-lymphocyte-associated protein 4	yes|down	yes|down	no|down	2
gene2317	PARD3B	par-3 family cell polarity regulator beta	yes|up	yes|up	no|down	2
gene3375	DNAH10	dynein, axonemal, heavy chain 10	no|down	yes|down	no|down	1
gene4411	NPY1R	neuropeptide Y receptor Y1, transcript variant X3	no|down	yes|down	no|down	1
gene3373	TCTN2	tectonic family member 2	yes|up	yes|up	no|down	2
gene2171	COBLL1	cordon-bleu WH2 repeat protein-like 1, transcript variant X1	yes|up	yes|up	no|up	2
gene2177	GALNT3	polypeptide N-acetylgalactosaminyltransferase 3, transcript variant X1	yes|down	yes|down	no|down	2
gene15679	LOC106044744	uncharacterized LOC106044744, transcript variant X5	yes|down	yes|down	no|down	2
gene929	GPR161	G protein-coupled receptor 161, transcript variant X2	yes|up	yes|up	no|down	2
gene1468	HSD17B12	hydroxysteroid (17-beta) dehydrogenase 12	yes|up	yes|up	no|down	2
gene1461	TSPAN18	tetraspanin 18, transcript variant X12	no|up	yes|up	no|up	1
gene1467	ALKBH3	alkB homolog 3, alpha-ketoglutarate-dependent dioxygenase	no|up	yes|up	no|up	1
gene1447	FAM180B	family with sequence similarity 180, member B	no|up	yes|up	no|down	1
gene3192	KIAA1147	KIAA1147 ortholog, transcript variant X1	no|down	yes|down	no|down	1
gene1292	APCDD1L	adenomatosis polyposis coli down-regulated 1-like	yes|up	yes|up	no|down	2
gene14419	HOMER2	homer scaffolding protein 2	no|down	yes|down	no|down	1
gene3198	LOC106030999	transcription factor SPT20 homolog, transcript variant X5	yes|up	yes|up	no|down	2
gene14414	BNC1	basonuclin 1, transcript variant X1	no|down	yes|down	no|down	1
gene15414	LOC106044440	uncharacterized LOC106044440	yes|down	yes|down	no|down	2
gene15412	ANKRD10	ankyrin repeat domain 10, transcript variant X1	yes|down	yes|down	no|down	2
gene12317	CALN1	calneuron 1, transcript variant X1	yes|up	yes|up	no|up	2
gene12315	SBDS	Shwachman-Bodian-Diamond syndrome	yes|up	yes|up	no|up	2
gene16670	PKP1	plakophilin 1, transcript variant X1	yes|down	yes|down	no|down	2
gene12312	LIMK1	LIM domain kinase 1	no|down	yes|down	no|down	1
gene16672	LAD1	ladinin 1, transcript variant X1	yes|down	yes|down	no|down	2
gene12310	WBSCR27	Williams Beuren syndrome chromosome region 27	yes|up	yes|up	no|up	2
gene13813	ATP6AP1L	ATPase, H+ transporting, lysosomal accessory protein 1-like, transcript variant X2	no|up	yes|up	no|up	1
gene15892	LOC106044971	cathepsin L1-like, transcript variant X1	yes|down	yes|down	no|up	2
gene15897	LOC106044932	perilipin-3-like	yes|up	yes|up	yes|up	3
gene13817	LOC106042719	uncharacterized LOC106042719	no|up	yes|up	no|down	1
gene15099	MED22	mediator complex subunit 22, transcript variant X1	yes|down	yes|down	no|up	2
gene4637	FOXO3	forkhead box O3	no|down	yes|down	no|down	1
gene7503	LOC106035756	arylsulfatase D-like, transcript variant X1	no|up	yes|up	no|up	1
gene7500	XG	Xg blood group	yes|down	yes|down	no|down	2
gene15095	GBGT1	globoside alpha-1,3-N-acetylgalactosaminyltransferase 1, transcript variant X2	no|up	yes|up	no|up	1
gene7504	LOC106035671	arylsulfatase D-like, transcript variant X1	no|up	yes|up	no|up	1
gene20254	LOC106049750	zinc finger protein 883-like	yes|up	yes|up	no|up	2
gene20253	LOC106049745	zinc finger protein OZF-like	no|up	yes|up	no|up	1
gene6111	PLEKHG1	pleckstrin homology domain containing, family G (with RhoGef domain) member 1, transcript variant X1	yes|up	yes|up	no|up	2
gene6114	AKAP12	A kinase (PRKA) anchor protein 12, transcript variant X1	no|up	yes|up	no|up	1
gene1912	EXO1	exonuclease 1	yes|down	yes|down	no|up	2
gene1913	MAP1LC3C	microtubule-associated protein 1 light chain 3 gamma	no|up	yes|up	no|up	1
gene14046	KIF4A	kinesin family member 4A, transcript variant X1	yes|down	yes|down	no|up	2
gene7446	MGAT4A	mannosyl (alpha-1,3-)-glycoprotein beta-1,4-N-acetylglucosaminyltransferase, isozyme A, transcript variant X3	yes|down	yes|down	no|down	2
gene18968	ZAP70	zeta-chain (TCR) associated protein kinase 70kDa, transcript variant X3	yes|down	yes|down	no|up	2
gene20038	LOC106049530	diacylglycerol kinase delta-like	no|down	yes|down	no|down	1
gene7443	KIAA1211L	KIAA1211-like ortholog, transcript variant X1	yes|up	yes|up	no|up	2
gene7440	MITD1	MIT, microtubule interacting and transport, domain containing 1	yes|down	yes|down	no|down	2
gene15328	LOC106044340	uncharacterized LOC106044340	yes|down	yes|down	no|down	2
gene20033	FAAH2	fatty acid amide hydrolase 2	yes|down	yes|down	no|down	2
gene20032	LOC106049528	uncharacterized LOC106049528	yes|down	yes|down	no|up	2
gene14042	INPPL1	inositol polyphosphate phosphatase-like 1	yes|down	yes|down	no|down	2
gene20037	CCNB3	cyclin B3	yes|down	yes|down	no|up	2
gene20035	CLIC2	chloride intracellular channel 2	no|down	yes|down	no|down	1
gene20740	CLCF1	cardiotrophin-like cytokine factor 1	no|down	yes|down	yes|down	2
gene9325	PIGA	phosphatidylinositol glycan anchor biosynthesis, class A	no|up	yes|up	no|up	1
gene9326	FIGF	c-fos induced growth factor (vascular endothelial growth factor D)	yes|up	yes|up	no|up	2
gene4240	GID4	GID complex subunit 4	yes|down	yes|down	no|down	2
gene9323	ASB9	ankyrin repeat and SOCS box containing 9	no|up	yes|up	yes|up	2
gene19226	PCSK2	proprotein convertase subtilisin/kexin type 2, transcript variant X1	no|up	yes|up	no|up	1
gene10317	ANGEL1	angel homolog 1 (Drosophila), transcript variant X1	no|up	yes|up	yes|up	2
gene19223	LOC106048674	prokineticin receptor 2	no|down	yes|down	yes|down	2
gene11771	CHRNB3	cholinergic receptor, nicotinic, beta 3 (neuronal)	no|up	yes|up	no|up	1
gene11773	IDUA	iduronidase, alpha-L-, transcript variant X1	no|up	yes|up	no|up	1
gene12336	GATSL2	GATS protein-like 2, transcript variant X1	no|up	yes|up	no|up	1
gene11778	TMEM175	transmembrane protein 175	no|up	yes|up	no|up	1
gene10424	FAM53B	family with sequence similarity 53, member B	no|down	yes|down	no|down	1
gene11403	HRH1	histamine receptor H1, transcript variant X1	yes|up	yes|up	no|down	2
gene10138	PITX2	paired-like homeodomain 2	no|down	yes|down	no|down	1
gene10429	TEX36	testis expressed 36	yes|up	yes|up	no|up	2
gene10428	CTBP2	C-terminal binding protein 2	no|up	yes|up	no|up	1
gene19595	LHFP	lipoma HMGIC fusion partner	yes|up	yes|up	no|up	2
gene1267	TFAP2C	transcription factor AP-2 gamma (activating enhancer binding protein 2 gamma)	yes|down	yes|down	no|up	2
gene1261	AURKA	aurora kinase A	yes|down	yes|down	no|up	2
gene1262	CSTF1	cleavage stimulation factor, 3' pre-RNA, subunit 1, 50kDa	no|down	yes|down	no|down	1
gene19598	NPAS2	neuronal PAS domain protein 2	yes|up	yes|up	no|up	2
gene8635	CYYR1	cysteine/tyrosine-rich 1, transcript variant X1	no|up	yes|up	no|up	1
gene8188	IGDCC3	immunoglobulin superfamily, DCC subclass, member 3	no|up	yes|up	no|up	1
gene8187	PARP16	poly (ADP-ribose) polymerase family, member 16	no|up	yes|up	no|up	1
gene9852	CDCP1	CUB domain containing protein 1	no|down	yes|down	no|down	1
gene382	LOC106032017	adipogenesis regulatory factor-like, transcript variant X1	no|up	yes|up	yes|up	2
gene20819	LOC106029690	interferon-induced very large GTPase 1-like	yes|down	yes|down	no|down	2
gene8850	PLD4	phospholipase D family, member 4, transcript variant X1	yes|down	yes|down	no|up	2
gene923	LOC106038263	lymphotactin-like	yes|down	yes|down	yes|up	3
gene9454	LOC106037965	zinc finger and BTB domain-containing protein 8A-like	yes|down	yes|down	no|down	2
gene9101	LOC106037503	neurabin-1-like	no|up	yes|up	yes|up	2
gene9100	PON2	paraoxonase 2	no|up	yes|up	yes|up	2
gene9450	KIAA1522	KIAA1522 ortholog	no|up	yes|down	yes|down	2
gene18170	LOC106047519	endothelin B receptor-like	yes|down	yes|down	no|down	2
gene8985	VGLL1	vestigial-like family member 1, transcript variant X1	yes|down	yes|down	no|down	2
gene18174	TMLHE	trimethyllysine hydroxylase, epsilon	no|up	yes|up	no|up	1
gene18177	LOC106047538	uncharacterized LOC106047538, transcript variant X2	no|up	yes|up	no|up	1
gene17334	NQO1	NAD(P)H dehydrogenase, quinone 1, transcript variant X1	no|down	yes|down	no|down	1
gene8458	ZBTB47	zinc finger and BTB domain containing 47	no|up	yes|up	no|up	1
gene16313	TLE4	transducin-like enhancer of split 4, transcript variant X1	no|down	yes|down	no|down	1
gene658	NCAPG	non-SMC condensin I complex, subunit G	yes|down	yes|down	no|up	2
gene652	QDPR	quinoid dihydropteridine reductase	no|up	yes|up	no|up	1
gene650	LDB2	LIM domain binding 2, transcript variant X1	yes|up	yes|up	no|down	2
gene1697	LGR5	leucine-rich repeat containing G protein-coupled receptor 5, transcript variant X1	yes|up	yes|up	no|down	2
gene1693	TBC1D15	TBC1 domain family, member 15	no|up	yes|up	no|up	1
gene16864	HOPX	HOP homeobox, transcript variant X1	no|up	yes|up	no|up	1
gene16861	DUSP4	dual specificity phosphatase 4	yes|down	yes|down	no|down	2
gene16862	LOC106046101	uncharacterized LOC106046101, transcript variant X1	no|up	yes|up	yes|up	2
gene13835	PSD2	pleckstrin and Sec7 domain containing 2, transcript variant X1	no|up	yes|up	no|up	1
gene18317	SIAH2	siah E3 ubiquitin protein ligase 2	yes|down	yes|down	no|down	2
gene13836	NRG2	neuregulin 2	yes|down	yes|down	no|down	2
gene18311	GPR87	G protein-coupled receptor 87	yes|down	yes|down	no|down	2
gene13830	CKMT2	creatine kinase, mitochondrial 2 (sarcomeric)	yes|down	yes|down	no|down	2
gene19772	LOC106049262	selenium-binding protein 1-like	yes|down	yes|down	no|down	2
gene19822	CDKL1	cyclin-dependent kinase-like 1 (CDC2-related kinase)	no|up	yes|up	no|up	1
gene19823	ATP5S	ATP synthase, H+ transporting, mitochondrial Fo complex, subunit s (factor B), transcript variant X3	no|up	yes|up	no|up	1
gene18427	NUF2	NUF2, NDC80 kinetochore complex component	yes|down	yes|down	no|up	2
gene13304	LOC106042201	ubiquitin carboxyl-terminal hydrolase CYLD-like, transcript variant X2	no|down	yes|down	no|down	1
gene18422	UCK2	uridine-cytidine kinase 2	no|down	yes|down	no|down	1
gene2765	RIPK2	receptor-interacting serine-threonine kinase 2	no|down	yes|down	no|down	1
gene2766	LOC106030540	uncharacterized LOC106030540	yes|down	yes|down	no|up	2
gene6473	LOC106034797	uncharacterized LOC106034797	no|up	yes|up	no|up	1
gene6475	PITPNC1	phosphatidylinositol transfer protein, cytoplasmic 1, transcript variant X1	yes|down	yes|down	no|down	2
gene6478	LOC106034642	chromosome unknown open reading frame, human C17orf58	yes|up	yes|up	no|up	2
gene6479	KPNA2	karyopherin alpha 2 (RAG cohort 1, importin alpha 1), transcript variant X1	yes|down	yes|down	no|up	2
gene2360	MPP4	membrane protein, palmitoylated 4 (MAGUK p55 subfamily member 4)	no|up	yes|up	no|up	1
gene2361	TMEM237	transmembrane protein 237	no|up	yes|up	no|up	1
gene3366	RILPL2	Rab interacting lysosomal protein-like 2	yes|down	yes|down	no|up	2
gene3363	CDK2AP1	cyclin-dependent kinase 2 associated protein 1	yes|up	yes|up	no|up	2
gene2105	ADCY5	adenylate cyclase 5, transcript variant X1	no|up	yes|up	no|up	1
gene17636	ADAM11	ADAM metallopeptidase domain 11	yes|up	yes|up	no|up	2
gene17801	LOC106047112	uncharacterized LOC106047112	yes|down	yes|down	no|up	2
gene17804	TPX2	TPX2, microtubule-associated, transcript variant X1	yes|down	yes|down	no|up	2
gene17807	DUSP15	dual specificity phosphatase 15, transcript variant X1	yes|up	yes|up	no|up	2
gene17808	TTLL9	tubulin tyrosine ligase-like family member 9, transcript variant X1	no|up	yes|up	no|up	1
gene12123	CDH4	cadherin 4, type 1, R-cadherin (retinal), transcript variant X1	yes|up	yes|up	no|down	2
gene14422	LOC106043360	uncharacterized LOC106043360, transcript variant X1	no|down	yes|down	no|down	1
gene3187	PTN	pleiotrophin	yes|down	yes|down	no|down	2
gene14934	NDFIP2	Nedd4 family interacting protein 2	no|up	yes|up	no|up	1
gene18528	FAM46B	family with sequence similarity 46, member B	no|down	yes|down	no|down	1
gene14429	LOC106043382	transient receptor potential cation channel subfamily M member 7-like	yes|down	yes|down	no|down	2
gene14428	USP50	ubiquitin specific peptidase 50	no|down	yes|down	no|down	1
gene12301	RNF43	ring finger protein 43, transcript variant X1	yes|down	yes|down	no|up	2
gene16682	IPO9	importin 9	no|up	yes|up	no|up	1
gene12304	MTMR4	myotubularin related protein 4	no|down	yes|down	no|down	1
gene16684	LOC106045884	tubulin alpha-8 chain	yes|down	yes|down	no|up	2
gene12306	ABHD11	abhydrolase domain containing 11	no|up	yes|up	no|up	1
gene16686	LGR6	leucine-rich repeat containing G protein-coupled receptor 6	yes|up	yes|up	yes|up	3
gene12308	LOC106041034	uncharacterized LOC106041034	no|down	yes|down	no|down	1
gene3342	LOC106031149	P2X purinoceptor 4-like, transcript variant X1	yes|up	yes|up	no|up	2
gene2585	MYO6	myosin VI, transcript variant X1	yes|up	yes|up	no|up	2
gene12568	SLC26A9	solute carrier family 26 (anion exchanger), member 9	no|down	yes|down	no|down	1
gene15884	UHRF1	ubiquitin-like with PHD and ring finger domains 1	yes|down	yes|down	no|down	2
gene13562	FGF2	fibroblast growth factor 2 (basic), transcript variant X2	yes|up	yes|up	no|down	2
gene6290	LOC106034581	uncharacterized LOC106034581	no|up	yes|up	yes|up	2
gene6293	LOC106034579	uncharacterized LOC106034579, transcript variant X1	yes|up	yes|up	no|up	2
gene14684	LOC106043657	uncharacterized LOC106043657	yes|up	yes|up	no|up	2
gene14681	LOC106043665	uncharacterized LOC106043665	no|down	yes|down	no|down	1
gene3348	LOC106031415	sarcoplasmic/endoplasmic reticulum calcium ATPase 2	no|down	yes|down	yes|down	2
gene5752	E2F8	E2F transcription factor 8	yes|down	yes|down	no|up	2
gene4620	DDO	D-aspartate oxidase, transcript variant X1	yes|up	yes|up	no|up	2
gene20242	LOC106049758	zinc finger protein RFP-like	no|down	yes|down	yes|down	2
gene4659	LOC106032528	uncharacterized LOC106032528, transcript variant X1	no|down	yes|down	no|down	1
gene4628	PPIL6	peptidylprolyl isomerase (cyclophilin)-like 6	no|down	yes|down	no|down	1
gene7908	ZBTB38	zinc finger and BTB domain containing 38, transcript variant X1	yes|down	yes|down	no|down	2
gene19675	CLDN19	claudin 19	yes|down	yes|down	no|down	2
gene1904	GREM2	gremlin 2, DAN family BMP antagonist, transcript variant X3	no|up	yes|up	yes|up	2
gene14209	STON1	stonin 1, transcript variant X1	yes|up	yes|up	no|up	2
gene14201	EPCAM	epithelial cell adhesion molecule	yes|down	yes|down	no|down	2
gene7452	CNGA3	cyclic nucleotide gated channel alpha 3	no|down	yes|down	no|down	1
gene2975	VSNL1	visinin-like 1	yes|down	yes|down	no|up	2
gene15334	TMEM170B	transmembrane protein 170B	no|up	yes|up	no|up	1
gene20029	PTK2B	protein tyrosine kinase 2 beta	yes|down	yes|down	no|up	2
gene15338	PLAT	plasminogen activator, tissue, transcript variant X1	no|up	yes|up	no|up	1
gene20025	LOC106049527	nuclear GTPase SLIP-GC-like, transcript variant X1	no|down	yes|down	no|down	1
gene20027	EPHX2	epoxide hydrolase 2, cytoplasmic	no|up	yes|up	no|up	1
gene18953	LOC106048382	interferon-induced very large GTPase 1-like	yes|down	yes|down	no|down	2
gene20022	PBK	PDZ binding kinase	yes|down	yes|down	no|down	2
gene18950	LOC106048380	uncharacterized LOC106048380, transcript variant X2	yes|up	yes|up	no|up	2
gene17866	MYOCD	myocardin	no|down	yes|down	yes|down	2
gene20751	LOC106029620	acrosin-like	yes|down	yes|down	no|down	2
gene7633	LOC106035875	chromosome unknown open reading frame, human C22orf23, transcript variant X1	no|up	yes|up	no|up	1
gene1496	CD44	CD44 molecule (Indian blood group)	no|down	yes|down	yes|down	2
gene5579	SEMA6D	sema domain, transmembrane domain (TM), and cytoplasmic domain, (semaphorin) 6D, transcript variant X1	yes|up	yes|up	yes|up	3
gene19210	ZNF710	zinc finger protein 710	yes|down	yes|down	no|down	2
gene19217	RASGRF1	Ras protein-specific guanine nucleotide-releasing factor 1, transcript variant X1	yes|down	yes|down	no|up	2
gene10307	JDP2	Jun dimerization protein 2	no|up	yes|down	yes|down	2
gene10304	FOS	FBJ murine osteosarcoma viral oncogene homolog	yes|up	yes|down	yes|down	3
gene5577	SLC24A5	solute carrier family 24 (sodium/potassium/calcium exchanger), member 5	no|up	yes|up	no|up	1
gene11436	WNT7A	wingless-type MMTV integration site family, member 7A	no|down	yes|down	no|down	1
gene11433	FBLN2	fibulin 2, transcript variant X4	no|up	yes|up	no|up	1
gene11358	COQ10B	coenzyme Q10B	yes|up	yes|up	no|up	2
gene1270	BMP7	bone morphogenetic protein 7	no|down	yes|down	no|down	1
gene4181	CARD11	caspase recruitment domain family, member 11, transcript variant X1	yes|down	yes|down	no|up	2
gene4186	LOC106032071	cytochrome P450 3A8-like	no|up	yes|up	no|up	1
gene8620	NCAM2	neural cell adhesion molecule 2, transcript variant X1	no|down	yes|down	yes|down	2
gene8197	COBL	cordon-bleu WH2 repeat protein, transcript variant X3	yes|up	yes|up	no|up	2
gene9866	CXCR6	chemokine (C-X-C motif) receptor 6	yes|down	yes|down	no|up	2
gene9867	XCR1	chemokine (C motif) receptor 1	yes|down	yes|down	no|up	2
gene8849	AHNAK2	AHNAK nucleoprotein 2	yes|up	yes|up	no|up	2
gene9865	FYCO1	FYVE and coiled-coil domain containing 1	yes|up	yes|up	no|up	2
gene428	LOC106032636	uncharacterized LOC106032636, transcript variant X1	no|up	yes|up	no|up	1
gene9861	SNRPD1	small nuclear ribonucleoprotein D1 polypeptide 16kDa	yes|down	yes|down	no|down	2
gene930	LOC106037084	transcription termination factor 2-like	no|up	yes|up	no|up	1
gene937	COL8A1	collagen, type VIII, alpha 1	yes|up	yes|up	no|up	2
gene8845	GPR132	G protein-coupled receptor 132	yes|down	yes|down	no|down	2
gene423	TMEM254	transmembrane protein 254	yes|down	yes|down	no|down	2
gene5109	KIF2C	kinesin family member 2C, transcript variant X1	yes|down	yes|down	no|up	2
gene5106	PLK3	polo-like kinase 3	no|down	yes|down	yes|down	2
gene4981	PARS2	prolyl-tRNA synthetase 2, mitochondrial (putative)	no|up	yes|up	no|up	1
gene8990	FHL1	four and a half LIM domains 1, transcript variant X1	yes|up	yes|up	no|up	2
gene9468	LCK	LCK proto-oncogene, Src family tyrosine kinase	yes|down	yes|down	no|up	2
gene4989	TCEANC2	transcription elongation factor A (SII) N-terminal and central domain containing 2	no|down	yes|down	no|down	1
gene8447	IBA57	IBA57 homolog, iron-sulfur cluster assembly	no|down	yes|down	no|down	1
gene8141	LOC106036475	uncharacterized LOC106036475, transcript variant X2	no|up	yes|up	yes|up	2
gene17307	THEMIS2	thymocyte selection associated family member 2	yes|down	yes|down	no|up	2
gene17304	XKR8	XK, Kell blood group complex subunit-related family, member 8	yes|down	yes|down	no|down	2
gene3321	LRRC43	leucine rich repeat containing 43, transcript variant X5	no|down	yes|down	no|down	1
gene17479	GCGR	glucagon receptor	no|down	yes|up	yes|up	2
gene10346	HTR5A	5-hydroxytryptamine (serotonin) receptor 5A, G protein-coupled	no|up	yes|up	no|up	1
gene16306	LOC106045455	guanine nucleotide-binding protein subunit alpha-14, transcript variant X1	yes|up	yes|up	no|up	2
gene18789	SBNO2	strawberry notch homolog 2 (Drosophila), transcript variant X1	no|down	yes|down	yes|down	2
gene17471	SOCS3	suppressor of cytokine signaling 3	no|down	yes|down	yes|down	2
gene17473	TK1	thymidine kinase 1, soluble	yes|down	yes|down	no|up	2
gene18786	HMHA1	histocompatibility (minor) HA-1	yes|down	yes|down	no|down	2
gene16309	CEP78	centrosomal protein 78kDa, transcript variant X2	no|up	yes|up	no|up	1
gene647	PROM1	prominin 1, transcript variant X1	no|down	yes|down	no|down	1
gene12803	FMO3	flavin containing monooxygenase 3, transcript variant X2	no|up	yes|up	no|up	1
gene12802	LOC106041532	dimethylaniline monooxygenase [N-oxide-forming] 4-like, transcript variant X1	no|up	yes|up	no|up	1
gene12800	MYOC	myocilin, trabecular meshwork inducible glucocorticoid response	yes|up	yes|up	no|down	2
gene6726	LOC106034972	uncharacterized LOC106034972	yes|up	yes|down	yes|down	3
gene18304	SUCNR1	succinate receptor 1	no|up	yes|down	yes|down	2
gene18305	AADAC	arylacetamide deacetylase, transcript variant X1	yes|up	yes|up	yes|up	3
gene18302	PROM2	prominin 2	yes|down	yes|down	no|down	2
gene13823	CCDC125	coiled-coil domain containing 125, transcript variant X1	no|down	yes|down	no|down	1
gene18300	RASSF2	Ras association (RalGDS/AF-6) domain family member 2	yes|down	yes|down	no|down	2
gene18301	PRNP	prion protein, transcript variant X1	no|up	yes|up	no|up	1
gene19789	CTSK	cathepsin K	yes|up	yes|up	no|up	2
gene9513	COL8A2	collagen, type VIII, alpha 2	yes|up	yes|up	no|down	2
gene18430	RNF222	ring finger protein 222, transcript variant X1	yes|down	yes|down	no|down	2
gene13313	LOC106042183	lymphocyte antigen 6E-like	yes|down	yes|down	no|down	2
gene13315	LOC106042188	lymphocyte antigen 6E-like	yes|down	yes|down	no|up	2
gene13318	LOC106042178	ly6/PLAUR domain-containing protein 2-like	no|down	yes|down	no|down	1
gene17700	HSP90AA1	heat shock protein 90kDa alpha (cytosolic), class A member 1	yes|down	yes|down	yes|down	3
gene2775	CPNE3	copine III, transcript variant X2	no|up	yes|up	no|up	1
gene6465	LOC106034680	uncharacterized LOC106034680	yes|up	yes|up	no|down	2
gene8357	SSUH2	ssu-2 homolog (C. elegans)	no|up	yes|up	no|up	1
gene9718	ADGRF5	adhesion G protein-coupled receptor F5, transcript variant X1	no|down	yes|up	yes|up	2
gene14258	NOP56	NOP56 ribonucleoprotein	no|down	yes|down	no|down	1
gene9710	LOC106038153	24-hydroxycholesterol 7-alpha-hydroxylase, transcript variant X2	no|up	yes|up	yes|up	2
gene8354	OXTR	oxytocin receptor	yes|up	yes|up	no|down	2
gene2370	ITGB2	integrin, beta 2 (complement component 3 receptor 3 and 4 subunit), transcript variant X1	yes|down	yes|down	no|down	2
gene3353	CCDC62	coiled-coil domain containing 62	no|down	yes|down	no|down	1
gene5818	TCP11L1	t-complex 11, testis-specific-like 1, transcript variant X2	yes|up	yes|up	no|down	2
gene3356	ABCB9	ATP-binding cassette, sub-family B (MDR/TAP), member 9	no|down	yes|down	no|down	1
gene13603	LOC106042488	uncharacterized LOC106042488, transcript variant X1	yes|down	yes|down	no|down	2
gene5814	PRRG4	proline rich Gla (G-carboxyglutamic acid) 4 (transmembrane)	yes|down	yes|down	no|down	2
gene2117	SLC12A8	solute carrier family 12, member 8, transcript variant X5	no|up	yes|up	no|up	1
gene2716	NDUFAF6	NADH dehydrogenase (ubiquinone) complex I, assembly factor 6	yes|up	yes|up	no|up	2
gene15653	SRF	serum response factor (c-fos serum response element-binding transcription factor)	no|down	yes|down	no|down	1
gene15650	LOC106044698	uncharacterized LOC106044698, transcript variant X4	no|up	yes|up	no|up	1
gene1484	RAG2	recombination activating gene 2, transcript variant X1	yes|down	yes|down	no|up	2
gene1485	RAG1	recombination activating gene 1	yes|down	yes|down	no|up	2
gene14921	IRG1	immunoresponsive 1 homolog (mouse), transcript variant X1	no|down	yes|down	yes|down	2
gene14924	CLN5	ceroid-lipofuscinosis, neuronal 5	no|up	yes|up	no|up	1
gene2719	TP53INP1	tumor protein p53 inducible nuclear protein 1, transcript variant X1	no|up	yes|up	no|up	1
gene14929	SLAIN1	SLAIN motif family, member 1	no|down	yes|down	no|down	1
gene14438	RUNX1	runt-related transcription factor 1	yes|down	yes|down	no|down	2
gene15436	ABHD17B	abhydrolase domain containing 17B	no|down	yes|down	no|down	1
gene15435	TMEM2	transmembrane protein 2, transcript variant X1	no|down	yes|down	yes|down	2
gene16692	LOC106045913	C-X-C chemokine receptor type 2-like	no|down	yes|down	yes|down	2
gene16693	TNS1	tensin 1	yes|up	yes|up	no|down	2
gene12371	KATNAL1	katanin p60 subunit A-like 1, transcript variant X2	yes|up	yes|up	no|up	2
gene12372	LOC106041153	uncharacterized LOC106041153, transcript variant X3	yes|up	yes|up	no|up	2
gene16699	LOC106045932	uncharacterized LOC106045932	no|up	yes|up	no|up	1
gene12378	USPL1	ubiquitin specific peptidase like 1	yes|down	yes|down	no|up	2
gene2598	KCNQ5	potassium channel, voltage gated KQT-like subfamily Q, member 5, transcript variant X3	yes|down	yes|down	no|down	2
gene2590	COL12A1	collagen, type XII, alpha 1	yes|up	yes|up	no|down	2
gene2596	MB21D1	Mab-21 domain containing 1	yes|down	yes|down	no|down	2
gene18788	GPX4	glutathione peroxidase 4	no|up	yes|up	no|up	1
gene6282	ABLIM3	actin binding LIM protein family, member 3, transcript variant X1	no|up	yes|up	no|up	1
gene6403	LOC106034522	uncharacterized LOC106034522, transcript variant X1	yes|up	yes|up	no|down	2
gene5743	MPEG1	macrophage expressed 1	yes|down	yes|down	no|up	2
gene5740	LPXN	leupaxin	yes|down	yes|down	no|up	2
gene5747	RAB3IL1	RAB3A interacting protein (rabin3)-like 1, transcript variant X1	no|up	yes|up	no|up	1
gene5749	FADS1	fatty acid desaturase 1, transcript variant X1	no|up	yes|up	no|up	1
gene4615	AMD1	adenosylmethionine decarboxylase 1	no|down	yes|down	no|down	1
gene7523	PAH	phenylalanine hydroxylase	yes|down	yes|down	no|down	2
gene20239	LOC106049749	E3 ubiquitin-protein ligase TRIM41-like, transcript variant X1	yes|down	yes|down	no|up	2
gene20236	INSRR	insulin receptor-related receptor	no|down	yes|down	no|down	1
gene6132	IPCEF1	interaction protein for cytohesin exchange factors 1, transcript variant X3	no|down	yes|down	no|down	1
gene6137	TFB1M	transcription factor B1, mitochondrial	no|up	yes|up	no|up	1
gene6138	CLDN20	claudin 20, transcript variant X1	yes|up	yes|up	no|up	2
gene17090	IFT140	intraflagellar transport 140, transcript variant X1	yes|up	yes|up	no|up	2
gene7427	LOC106035572	interleukin-31 receptor subunit alpha-like	yes|down	yes|down	no|up	2
gene14211	LHCGR	luteinizing hormone/choriogonadotropin receptor	yes|up	yes|up	no|up	2
gene20587	GDF15	growth differentiation factor 15	no|down	yes|down	no|down	1
gene15343	ANK1	ankyrin 1, erythrocytic, transcript variant X2	yes|up	yes|up	no|down	2
gene20584	LOC106029442	chromosome unknown open reading frame, human C7orf43	no|down	yes|down	no|down	1
gene15348	SFRP1	secreted frizzled-related protein 1	yes|down	yes|down	no|down	2
gene13934	RBM5	RNA binding motif protein 5, transcript variant X1	yes|down	yes|down	no|down	2
gene14690	TIPIN	TIMELESS interacting protein	yes|down	yes|down	no|up	2
gene14695	DENND4A	DENN/MADD domain containing 4A	no|down	yes|down	no|down	1
gene18252	IL1RAP	interleukin 1 receptor accessory protein, transcript variant X7	no|up	yes|down	yes|down	2
gene1195	PREX1	phosphatidylinositol-3,4,5-trisphosphate-dependent Rac exchange factor 1	no|down	yes|down	no|down	1
gene19204	PRC1	protein regulator of cytokinesis 1	yes|down	yes|down	no|down	2
gene10330	LOC106038866	uncharacterized LOC106038866	no|up	yes|up	no|up	1
gene10334	AHSA1	AHA1, activator of heat shock 90kDa protein ATPase homolog 1 (yeast)	yes|down	yes|down	no|down	2
gene19208	SEMA4B	sema domain, immunoglobulin domain (Ig), transmembrane domain (TM) and short cytoplasmic domain, (semaphorin) 4B	yes|down	yes|down	no|down	2
gene5182	LOC106033293	C-C motif chemokine 4-like	no|down	yes|down	no|down	1
gene11424	ACAD9	acyl-CoA dehydrogenase family, member 9	yes|up	yes|up	no|down	2
gene11426	IQSEC1	IQ motif and Sec7 domain 1, transcript variant X1	yes|up	yes|up	no|down	2
gene11429	NUP210	nucleoporin 210kDa, transcript variant X1	yes|down	yes|down	no|up	2
gene6919	PARM1	prostate androgen-regulated mucin-like protein 1	no|up	yes|up	no|up	1
gene4195	TNRC18	trinucleotide repeat containing 18	no|up	yes|up	no|up	1
gene4906	ITK	IL2-inducible T-cell kinase	yes|down	yes|down	no|up	2
gene20768	LOC106029637	uncharacterized LOC106029637	yes|up	yes|up	no|up	2
gene8613	CHODL	chondrolectin	no|down	yes|down	no|down	1
gene539	POLN	polymerase (DNA directed) nu, transcript variant X1	yes|down	yes|down	no|up	2
gene18606	FKBP10	FK506 binding protein 10, 65 kDa, transcript variant X2	yes|up	yes|up	no|up	2
gene12640	TMEM132E	transmembrane protein 132E	no|up	yes|up	no|up	1
gene410	LOC106032461	uncharacterized LOC106032461	yes|down	yes|down	no|up	2
gene10842	FRRS1	ferric-chelate reductase 1, transcript variant X4	no|up	yes|up	no|up	1
gene5179	CENPT	centromere protein T	yes|down	yes|down	no|up	2
gene10599	ANAPC13	anaphase promoting complex subunit 13	yes|down	yes|down	no|up	2
gene10846	LOC106039426	lipid phosphate phosphatase-related protein type 5	yes|up	yes|up	yes|up	3
gene5174	EXOC3L1	exocyst complex component 3-like 1	no|up	yes|up	no|up	1
gene10595	EHHADH	enoyl-CoA, hydratase/3-hydroxyacyl CoA dehydrogenase, transcript variant X3	yes|up	yes|up	yes|up	3
gene10594	LOC106039209	chromosome unknown open reading frame, human C3orf70, transcript variant X3	no|up	yes|up	yes|up	2
gene1108	GBE1	glucan (1,4-alpha-), branching enzyme 1, transcript variant X2	yes|up	yes|up	no|up	2
gene8478	VILL	villin-like, transcript variant X1	yes|up	yes|up	no|up	2
gene9470	MARCKSL1	MARCKS-like 1	yes|down	yes|down	no|up	2
gene8472	CRHR2	corticotropin releasing hormone receptor 2, transcript variant X1	yes|up	yes|up	no|up	2
gene18157	LOC106047513	exocyst complex component 1-like, transcript variant X2	yes|down	yes|down	no|up	2
gene12649	PEX12	peroxisomal biogenesis factor 12	no|up	yes|up	no|up	1
gene17316	EDN2	endothelin 2	yes|down	yes|down	no|down	2
gene18153	LOC106047520	Krueppel-like factor 5	no|down	yes|down	no|down	1
gene17313	LOC106046581	CTP synthase 1-like	no|down	yes|down	no|down	1
gene10113	LOC106038631	uncharacterized LOC106038631, transcript variant X1	yes|down	yes|down	no|up	2
gene10112	LOC106038673	uncharacterized LOC106038673, transcript variant X3	yes|down	yes|down	no|up	2
gene10447	MKI67	marker of proliferation Ki-67	yes|down	yes|down	no|up	2
gene10117	NDST4	N-deacetylase/N-sulfotransferase (heparan glucosaminyl) 4, transcript variant X2	yes|down	yes|down	no|up	2
gene10440	DOCK1	dedicator of cytokinesis 1	yes|up	yes|up	no|down	2
gene18158	GLOD5	glyoxalase domain containing 5	yes|down	yes|down	no|up	2
gene16994	PRDM6	PR domain containing 6	yes|up	yes|up	no|up	2
gene13143	ASPM	asp (abnormal spindle) homolog, microcephaly associated (Drosophila)	yes|down	yes|down	no|down	2
gene17469	DNAH17	dynein, axonemal, heavy chain 17	yes|down	yes|down	yes|down	3
gene16992	CSNK1G3	casein kinase 1, gamma 3, transcript variant X2	yes|up	yes|up	no|up	2
gene13149	PRKAR2B	protein kinase, cAMP-dependent, regulatory, type II, beta, transcript variant X1	yes|up	yes|up	no|up	2
gene17463	ENGASE	endo-beta-N-acetylglucosaminidase	yes|down	yes|down	no|down	2
gene16999	SNCAIP	synuclein, alpha interacting protein, transcript variant X1	no|up	yes|up	no|up	1
gene2407	IL6	interleukin 6	no|up	yes|down	no|down	1
gene20652	LOC106029514	nck-associated protein 1-like	yes|down	yes|down	no|down	2
gene899	BOC	BOC cell adhesion associated, oncogene regulated, transcript variant X1	no|up	yes|up	no|up	1
gene12814	LOC106041602	E-selectin-like, transcript variant X1	no|down	yes|down	yes|down	2
gene12815	RXRG	retinoid X receptor, gamma, transcript variant X1	no|up	yes|up	yes|up	2
gene16847	LOC106046070	probable E3 ubiquitin-protein ligase HERC4	yes|down	yes|down	no|down	2
gene18333	CP	ceruloplasmin (ferroxidase), transcript variant X1	yes|up	yes|up	no|up	2
gene18337	LOC106047694	uncharacterized LOC106047694	no|up	yes|up	no|up	1
gene9871	TOPBP1	topoisomerase (DNA) II binding protein 1, transcript variant X1	yes|down	yes|down	no|up	2
gene9870	LOC106038357	C-C chemokine receptor type 5-like, transcript variant X2	yes|down	yes|down	no|up	2
gene9875	TMEM108	transmembrane protein 108, transcript variant X2	yes|up	yes|up	no|up	2
gene15857	HAUS8	HAUS augmin-like complex, subunit 8	no|down	yes|down	no|down	1
gene2746	RUNX1T1	runt-related transcription factor 1; translocated to, 1 (cyclin D-related)	no|up	yes|up	no|up	1
gene2296	ITGA4	integrin, alpha 4 (antigen CD49D, alpha 4 subunit of VLA-4 receptor)	no|down	yes|down	no|down	1
gene6456	RGS9	regulator of G-protein signaling 9, transcript variant X1	yes|down	yes|down	no|down	2
gene6454	LOC106034700	uncharacterized LOC106034700	yes|down	yes|down	no|down	2
gene6455	GNA13	guanine nucleotide binding protein (G protein), alpha 13	no|down	yes|down	no|down	1
gene6453	SLC16A6	solute carrier family 16, member 6	no|down	yes|down	yes|down	2
gene6451	ARSG	arylsulfatase G	yes|up	yes|up	no|up	2
gene11341	TMEFF2	transmembrane protein with EGF-like and two follistatin-like domains 2	yes|up	yes|up	no|up	2
gene679	PPARGC1A	peroxisome proliferator-activated receptor gamma, coactivator 1 alpha, transcript variant X1	no|down	yes|down	no|down	1
gene9706	ENPP4	ectonucleotide pyrophosphatase/phosphodiesterase 4 (putative)	yes|down	yes|down	no|up	2
gene9704	CLIC5	chloride intracellular channel 5, transcript variant X1	no|up	yes|up	yes|up	2
gene3345	IFT81	intraflagellar transport 81	yes|up	yes|up	no|down	2
gene4424	CPE	carboxypeptidase E, transcript variant X1	yes|up	yes|up	no|down	2
gene3431	LOC106031230	uncharacterized LOC106031230, transcript variant X1	yes|up	yes|up	no|up	2
gene3437	LOC106031234	uncharacterized LOC106031234	no|down	yes|down	yes|down	2
gene3340	ANAPC5	anaphase promoting complex subunit 5	no|up	yes|up	no|up	1
gene4423	MSMO1	methylsterol monooxygenase 1	no|up	yes|up	no|up	1
gene5829	OLFML1	olfactomedin-like 1	yes|up	yes|up	no|down	2
gene2120	LOC106029911	TGF-beta receptor type-2-like	yes|up	yes|up	no|up	2
gene15645	SLC1A4	solute carrier family 1 (glutamate/neutral amino acid transporter), member 4	yes|down	yes|down	no|down	2
gene2125	LOC106029917	glycerol-3-phosphate dehydrogenase [NAD(+)], cytoplasmic-like	yes|up	yes|up	no|up	2
gene16511	ATP8B3	ATPase, aminophospholipid transporter, class I, type 8B, member 3, transcript variant X1	yes|down	yes|down	no|down	2
gene11340	SDPR	serum deprivation response	no|up	yes|up	no|up	1
gene16515	LOC106045650	nuclear receptor ROR-beta-like	no|down	yes|down	no|down	1
gene13765	MAP3K8	mitogen-activated protein kinase kinase kinase 8	no|down	yes|down	no|down	1
gene17864	LOC106047160	protein-glutamine gamma-glutamyltransferase E-like	no|down	yes|down	no|down	1
gene1497	LOC106044451	uncharacterized LOC106044451, transcript variant X1	yes|down	yes|down	yes|down	3
gene17863	LOC106047158	protein-glutamine gamma-glutamyltransferase 6-like, transcript variant X1	no|down	yes|down	no|down	1
gene17860	CCNDBP1	cyclin D-type binding-protein 1, transcript variant X1	yes|down	yes|down	no|down	2
gene16194	CENPE	centromere protein E, 312kDa	yes|down	yes|down	no|up	2
gene12142	MICALCL	MICAL C-terminal like	no|down	yes|down	no|down	1
gene12143	MICAL2	microtubule associated monooxygenase, calponin and LIM domain containing 2, transcript variant X1	no|down	yes|down	no|down	1
gene16193	BDH2	3-hydroxybutyrate dehydrogenase, type 2, transcript variant X1	no|up	yes|up	no|up	1
gene15424	LOC106044464	riboflavin kinase-like	yes|down	yes|down	no|down	2
gene15422	LOC106044472	protein prune homolog 2, transcript variant X3	no|up	yes|up	no|up	1
gene15423	GCNT1	glucosaminyl (N-acetyl) transferase 1, core 2, transcript variant X1	yes|down	yes|down	no|up	2
gene7086	DCSTAMP	dendrocyte expressed seven transmembrane protein	yes|down	yes|down	no|down	2
gene7082	SLC25A32	solute carrier family 25 (mitochondrial folate carrier), member 32, transcript variant X2	no|down	yes|down	no|down	1
gene12889	RNF182	ring finger protein 182, transcript variant X5	no|down	yes|down	no|down	1
gene5776	CCDC34	coiled-coil domain containing 34, transcript variant X1	no|up	yes|up	no|up	1
gene5775	LOC106033949	uncharacterized LOC106033949, transcript variant X4	yes|up	yes|up	no|up	2
gene5770	ANO3	anoctamin 3	yes|up	yes|up	no|up	2
gene4861	DCTN4	dynactin 4 (p62), transcript variant X1	yes|up	yes|up	no|up	2
gene4601	LAMA4	laminin, alpha 4, transcript variant X1	no|up	yes|up	no|up	1
gene14596	RAVER2	ribonucleoprotein, PTB-binding 2, transcript variant X1	no|up	yes|up	no|up	1
gene20224	PPIH	peptidylprolyl isomerase H (cyclophilin H), transcript variant X1	yes|down	yes|down	no|up	2
gene1209	SNAI1	snail family zinc finger 1	no|down	yes|down	no|down	1
gene16734	LOC106045951	band 3 anion transport protein-like	yes|up	yes|up	no|down	2
gene6146	TMEM242	transmembrane protein 242	no|up	yes|up	no|up	1
gene7843	KCNJ15	potassium channel, inwardly rectifying subfamily J, member 15	no|up	yes|up	no|up	1
gene6149	SNX9	sorting nexin 9	yes|up	yes|up	no|down	2
gene10080	XIAP	X-linked inhibitor of apoptosis, E3 ubiquitin protein ligase, transcript variant X5	no|down	yes|down	no|down	1
gene7438	LOC106035746	lysozyme g, transcript variant X2	yes|down	yes|down	no|down	2
gene1201	LOC106040595	somatomedin-B and thrombospondin type-1 domain-containing protein-like	yes|up	yes|up	no|up	2
gene14772	FAM64A	family with sequence similarity 64, member A, transcript variant X1	yes|down	yes|down	no|up	2
gene20596	LOC106029453	IgGFc-binding protein-like	yes|down	yes|down	no|down	2
gene15351	LOC106044437	chromosome unknown open reading frame, human C8orf4	no|down	yes|down	no|down	1
gene20599	LOC106029457	interferon-induced guanylate-binding protein 1-like	yes|down	yes|down	yes|down	3
gene2665	LOC106030435	glutathione S-transferase 3	no|down	yes|up	no|up	1
gene11630	ITM2C	integral membrane protein 2C	yes|down	yes|down	no|down	2
gene14118	LPAR1	lysophosphatidic acid receptor 1, transcript variant X1	yes|up	yes|up	no|up	2
gene11635	LOC106040280	G-protein coupled receptor 35-like	yes|down	yes|down	no|down	2
gene11634	LOC106040278	G-protein coupled receptor 35-like	yes|down	yes|down	no|up	2
gene11188	MPZL3	myelin protein zero-like 3	yes|down	yes|down	no|down	2
gene11187	MPZL2	myelin protein zero-like 2	yes|down	yes|down	no|down	2
gene11186	CD3E	CD3e molecule, epsilon (CD3-TCR complex)	yes|down	yes|down	no|up	2
gene11185	CD3D	CD3d molecule, delta (CD3-TCR complex), transcript variant X1	yes|down	yes|down	no|up	2
gene11181	ANKK1	ankyrin repeat and kinase domain containing 1	yes|down	yes|down	no|up	2
gene17723	LOC106047082	ras-related and estrogen-regulated growth inhibitor-like	yes|down	yes|down	yes|down	3
gene10324	ZDHHC22	zinc finger, DHHC-type containing 22	yes|up	yes|up	no|up	2
gene10326	NGB	neuroglobin	no|up	yes|up	yes|up	2
gene5558	LOC106033637	chromosome unknown open reading frame, human C15orf48	yes|down	yes|down	no|down	2
gene18932	HSD17B4	hydroxysteroid (17-beta) dehydrogenase 4	no|up	yes|up	no|up	1
gene10328	GSTZ1	glutathione S-transferase zeta 1, transcript variant X1	no|up	yes|up	no|up	1
gene5553	IQCE	IQ motif containing E	no|up	yes|up	no|up	1
gene11987	GSN	gelsolin, transcript variant X1	yes|up	yes|up	no|up	2
gene11985	CNTRL	centriolin	no|down	yes|down	no|down	1
gene11984	C5	complement component 5	yes|down	yes|down	no|up	2
gene11983	TRAF1	TNF receptor-associated factor 1, transcript variant X1	no|down	yes|down	no|down	1
gene11982	LOC106040729	uncharacterized LOC106040729	no|down	yes|down	no|down	1
gene11981	PHF19	PHD finger protein 19	no|down	yes|down	yes|down	2
gene11989	DAB2IP	DAB2 interacting protein	yes|up	yes|up	no|up	2
gene6921	CDKL2	cyclin-dependent kinase-like 2 (CDC2-related kinase), transcript variant X1	no|down	yes|down	no|down	1
gene1257	LOC106041848	formin-H-like	yes|down	yes|down	no|up	2
gene1251	DOK5	docking protein 5, transcript variant X1	no|down	yes|down	no|down	1
gene15885	LOC106045004	perilipin-3-like	no|down	yes|down	no|up	1
gene6928	HGSNAT	heparan-alpha-glucosaminide N-acetyltransferase, transcript variant X1	yes|up	yes|up	no|up	2
gene6929	POMK	protein-O-mannose kinase	no|up	yes|up	no|up	1
gene8608	CXADR	coxsackie virus and adenovirus receptor	no|down	yes|down	no|down	1
gene8604	TMEM140	transmembrane protein 140, transcript variant X1	no|up	yes|up	no|up	1
gene8861	LOC106037166	chromosome unknown open reading frame, human C14orf180	no|up	yes|up	yes|up	2
gene20821	LOC106029692	heparan sulfate glucosamine 3-O-sulfotransferase 3B1	yes|down	yes|down	no|up	2
gene8866	TDRD9	tudor domain containing 9	yes|up	yes|up	no|up	2
gene10584	LOC106039264	uncharacterized LOC106039264	no|up	yes|up	no|up	1
gene10588	PCCB	propionyl CoA carboxylase, beta polypeptide	no|up	yes|up	no|up	1
gene5165	LOC106033184	uncharacterized oxidoreductase C663.08c-like	no|up	yes|up	no|up	1
gene5164	FAM65A	family with sequence similarity 65, member A	no|down	yes|down	no|down	1
gene5162	RLTPR	RGD motif, leucine rich repeats, tropomodulin domain and proline-rich containing	yes|down	yes|down	no|up	2
gene5161	LOC106033135	uncharacterized LOC106033135	yes|down	yes|down	no|up	2
gene18140	ARHGEF9	Cdc42 guanine nucleotide exchange factor (GEF) 9, transcript variant X1	no|up	yes|up	no|up	1
gene18144	ASB12	ankyrin repeat and SOCS box containing 12	no|down	yes|down	yes|down	2
gene19418	HOXC13	homeobox C13	yes|down	yes|down	no|down	2
gene10454	EBF3	early B-cell factor 3, transcript variant X4	yes|up	yes|up	no|up	2
gene10102	USP53	ubiquitin specific peptidase 53, transcript variant X1	yes|up	yes|up	no|up	2
gene10451	LOC106038984	uncharacterized LOC106038984	no|up	yes|up	no|up	1
gene19639	LOC106049125	protein S100-A12-like	yes|down	yes|down	no|down	2
gene16987	ZNF608	zinc finger protein 608	yes|up	yes|up	no|up	2
gene17105	SLA	Src-like-adaptor	yes|down	yes|down	yes|down	3
gene17107	TMEM71	transmembrane protein 71, transcript variant X2	yes|down	yes|down	no|down	2
gene17458	CBX8	chromobox homolog 8, transcript variant X1	no|down	yes|down	no|down	1
gene19633	S100A1	S100 calcium binding protein A1, transcript variant X1	no|up	yes|up	no|up	1
gene19635	S100A16	S100 calcium binding protein A16	yes|down	yes|down	no|down	2
gene19634	LOC106049115	protein S100-A14-like, transcript variant X1	yes|down	yes|down	no|down	2
gene17451	RNF213	ring finger protein 213	yes|down	yes|down	no|down	2
gene888	KIAA1407	KIAA1407 ortholog	no|up	yes|up	yes|up	2
gene16856	PPP1R3B	protein phosphatase 1, regulatory subunit 3B	no|up	yes|up	no|up	1
gene10119	UGT8	UDP glycosyltransferase 8, transcript variant X1	no|down	yes|down	yes|down	2
gene17587	STAM2	signal transducing adaptor molecule (SH3 domain and ITAM motif) 2	no|up	yes|up	no|up	1
gene11636	LOC106040281	G-protein coupled receptor 35-like, transcript variant X4	yes|down	yes|down	no|down	2
gene17580	NMI	N-myc (and STAT) interactor, transcript variant X1	no|down	yes|down	no|down	1
gene405	FAM213A	family with sequence similarity 213, member A, transcript variant X1	no|up	yes|up	yes|up	2
gene400	NRG3	neuregulin 3, transcript variant X3	yes|up	yes|up	no|up	2
gene4385	FAM198B	family with sequence similarity 198, member B	no|up	yes|up	no|up	1
gene3866	DTD2	D-tyrosyl-tRNA deacylase 2 (putative), transcript variant X1	no|up	yes|up	no|up	1
gene3867	LOC106031736	uncharacterized LOC106031736, transcript variant X2	yes|up	yes|up	no|up	2
gene18456	LOC106047853	solute carrier family 25 member 33-like	no|up	yes|up	no|up	1
gene18452	EPHA1	EPH receptor A1	no|down	yes|down	no|up	1
gene18450	FAM131B	family with sequence similarity 131, member B, transcript variant X1	no|up	yes|up	no|up	1
gene2754	NECAB1	N-terminal EF-hand calcium binding protein 1	yes|up	yes|up	no|up	2
gene2287	CCDC141	coiled-coil domain containing 141, transcript variant X3	yes|down	yes|down	no|down	2
gene2286	TTN	titin	yes|down	yes|down	no|down	2
gene2283	DFNB59	deafness, autosomal recessive 59	no|down	yes|down	no|down	1
gene1710	BEST3	bestrophin 3	no|up	yes|up	no|up	1
gene1713	CCT2	chaperonin containing TCP1, subunit 2 (beta), transcript variant X1	no|down	yes|down	no|down	1
gene1716	LYZ	lysozyme	no|down	yes|down	no|down	1
gene2357	FZD7	frizzled class receptor 7	yes|up	yes|up	no|up	2
gene9738	LOC106038247	uncharacterized LOC106038247, transcript variant X1	no|down	yes|down	no|down	1
gene9736	LMNTD1	lamin tail domain containing 1, transcript variant X2	no|up	yes|up	no|up	1
gene9732	LOC106038256	lymphoid-restricted membrane protein-like, transcript variant X1	yes|down	yes|down	no|up	2
gene2358	CDK15	cyclin-dependent kinase 15	no|up	yes|up	no|up	1
gene5831	LOC106033848	NADH-cytochrome b5 reductase 2	no|up	yes|up	yes|up	2
gene15988	LOC106045044	plexin-A1	yes|up	yes|up	no|down	2
gene2139	LOC106029858	uncharacterized LOC106029858	no|up	yes|up	no|up	1
gene3401	FZD10	frizzled class receptor 10	yes|down	yes|down	no|down	2
gene15635	MEIS1	Meis homeobox 1, transcript variant X1	yes|up	yes|up	no|up	2
gene15634	LOC106044703	uncharacterized LOC106044703, transcript variant X4	yes|up	yes|up	no|up	2
gene3409	ADGRD1	adhesion G protein-coupled receptor D1, transcript variant X1	yes|up	yes|up	no|down	2
gene16502	NFIC	nuclear factor I/C (CCAAT-binding transcription factor)	yes|up	yes|up	no|down	2
gene12680	COL26A1	collagen, type XXVI, alpha 1, transcript variant X1	yes|up	yes|up	no|up	2
gene16505	MEX3D	mex-3 RNA binding family member D	no|down	yes|down	no|down	1
gene17853	CD40	CD40 molecule, TNF receptor superfamily member 5	yes|down	yes|down	no|down	2
gene17852	NCOA5	nuclear receptor coactivator 5, transcript variant X1	no|down	yes|down	no|down	1
gene17850	MMP9	matrix metallopeptidase 9	yes|down	yes|down	yes|down	3
gene13777	MKX	mohawk homeobox	yes|up	yes|up	no|up	2
gene17855	SLC35C2	solute carrier family 35 (GDP-fucose transporter), member C2, transcript variant X1	yes|down	yes|down	no|down	2
gene13775	LOC106042678	uncharacterized LOC106042678, transcript variant X2	yes|down	yes|down	no|down	2
gene19111	DNAJB5	DnaJ (Hsp40) homolog, subfamily B, member 5, transcript variant X1	no|down	yes|down	yes|down	2
gene12171	NRIP3	nuclear receptor interacting protein 3, transcript variant X1	no|down	yes|down	no|down	1
gene12170	SCUBE2	signal peptide, CUB domain, EGF-like 2, transcript variant X1	no|down	yes|down	yes|down	2
gene12177	TRIM66	tripartite motif containing 66	yes|down	yes|down	no|up	2
gene16188	NFKB1	nuclear factor of kappa light polypeptide gene enhancer in B-cells 1	no|down	yes|down	yes|down	2
gene16186	SLC39A8	solute carrier family 39 (zinc transporter), member 8	yes|down	yes|down	no|down	2
gene16184	LOC106045325	B-cell scaffold protein with ankyrin repeats-like	no|down	yes|down	no|down	1
gene16183	PARD3	par-3 family cell polarity regulator, transcript variant X1	yes|up	yes|up	no|down	2
gene18849	LOC106048249	olfactory receptor-like protein COR4, transcript variant X1	no|down	yes|down	yes|down	2
gene15187	SEMA7A	semaphorin 7A, GPI membrane anchor (John Milton Hagen blood group), transcript variant X1	no|down	yes|down	no|down	1
gene12352	GTF3A	general transcription factor IIIA	no|up	yes|up	no|up	1
gene12351	RASL11A	RAS-like, family 11, member A	yes|down	yes|down	no|down	2
gene17655	NEMF	nuclear export mediator factor	no|up	yes|up	no|up	1
gene12427	GRIN2A	glutamate receptor, ionotropic, N-methyl D-aspartate 2A, transcript variant X1	no|up	yes|up	no|up	1
gene3089	LMO3	LIM domain only 3 (rhombotin-like 2), transcript variant X1	yes|up	yes|up	yes|up	3
gene10798	WNT6	wingless-type MMTV integration site family, member 6	no|down	yes|down	no|down	1
gene7090	ZFPM2	zinc finger protein, FOG family member 2, transcript variant X1	yes|up	yes|up	no|up	2
gene5769	LUZP2	leucine zipper protein 2, transcript variant X1	no|up	yes|up	no|up	1
gene5767	GAS2	growth arrest-specific 2, transcript variant X4	yes|down	yes|down	no|down	2
gene10329	TMED8	transmembrane emp24 protein transport domain containing 8, transcript variant X1	no|down	yes|down	no|down	1
gene3668	RCOR3	REST corepressor 3, transcript variant X1	no|up	yes|up	no|up	1
gene3669	TRAF5	TNF receptor-associated factor 5, transcript variant X1	yes|down	yes|down	no|down	2
gene3667	KCNH1	potassium channel, voltage gated eag related subfamily H, member 1, transcript variant X2	no|up	yes|up	no|up	1
gene3664	HHAT	hedgehog acyltransferase, transcript variant X1	no|up	yes|up	no|up	1
gene3663	SERTAD4	SERTA domain containing 4	no|up	yes|up	no|up	1
gene3660	MRPS10	mitochondrial ribosomal protein S10	yes|down	yes|down	no|up	2
gene20213	IL1B	interleukin 1, beta	no|down	yes|down	yes|down	2
gene13212	WNT2	wingless-type MMTV integration site family member 2	no|up	yes|down	yes|down	2
gene6157	TMEM177	transmembrane protein 177, transcript variant X1	no|up	yes|up	no|up	1
gene6150	LOC106034246	uncharacterized LOC106034246, transcript variant X1	yes|up	yes|up	no|up	2
gene14906	MN1	meningioma (disrupted in balanced translocation) 1	yes|up	yes|up	no|down	2
gene5491	CYTH3	cytohesin 3	yes|up	yes|up	no|down	2
gene14760	SLCO4C1	solute carrier organic anion transporter family, member 4C1	no|down	yes|down	yes|down	2
gene7400	ZSWIM6	zinc finger, SWIM-type containing 6	no|down	yes|down	yes|down	2
gene2925	ITGB1BP1	integrin beta 1 binding protein 1, transcript variant X2	yes|down	yes|down	no|down	2
gene15360	LETM2	leucine zipper-EF-hand containing transmembrane protein 2, transcript variant X1	yes|up	yes|up	no|up	2
gene18926	ADAMTSL1	ADAMTS-like 1, transcript variant X1	yes|up	yes|up	no|down	2
gene18920	HOXB3	homeobox B3, transcript variant X3	no|up	yes|up	no|up	1
gene18929	PLIN2	perilipin 2, transcript variant X1	no|up	yes|down	yes|down	2
gene11193	IL10RA	interleukin 10 receptor, alpha	yes|down	yes|down	no|down	2
gene11194	TMPRSS13	transmembrane protease, serine 13	yes|down	yes|down	no|down	2
gene11197	DSCAML1	Down syndrome cell adhesion molecule like 1	no|down	yes|down	no|down	1
gene5549	LOC106033548	galanin receptor type 1-like	no|up	yes|up	no|up	1
gene4014	DUSP5	dual specificity phosphatase 5	yes|down	yes|down	yes|down	3
gene11441	PTPDC1	protein tyrosine phosphatase domain containing 1, transcript variant X1	yes|up	yes|up	no|up	2
gene19082	TRIM46	tripartite motif containing 46	no|down	yes|down	no|down	1
gene19080	THBS3	thrombospondin 3	no|up	yes|up	no|down	1
gene4179	AMZ1	archaelysin family metallopeptidase 1	no|down	yes|down	no|down	1
gene9510	LOC106037932	uncharacterized LOC106037932	no|down	yes|down	yes|down	2
gene9245	IDS	iduronate 2-sulfatase	yes|up	yes|up	no|up	2
gene5152	LOC106033289	uncharacterized LOC106033289	no|up	yes|down	yes|down	2
gene5153	TPPP3	tubulin polymerization-promoting protein family member 3	no|up	yes|down	yes|down	2
gene5150	KCTD19	potassium channel tetramerization domain containing 19	no|down	yes|down	yes|down	2
gene5151	LRRC36	leucine rich repeat containing 36, transcript variant X1	no|up	yes|down	yes|down	2
gene10862	F3	coagulation factor III (thromboplastin, tissue factor)	yes|down	yes|down	no|down	2
gene10861	SLC44A3	solute carrier family 44, member 3	no|up	yes|up	yes|up	2
gene12857	LOC106041672	interleukin-1 receptor type 1-like, transcript variant X1	no|up	yes|down	yes|down	2
gene7892	LOC106036203	chromosome unknown open reading frame, human C3orf58	no|up	yes|up	no|up	1
gene8494	CSRNP1	cysteine-serine-rich nuclear protein 1	no|down	yes|down	yes|down	2
gene18134	LOC106047481	proline dehydrogenase 1, mitochondrial-like	yes|down	yes|down	no|down	2
gene18131	SLC7A4	solute carrier family 7, member 4	no|down	yes|down	no|down	1
gene18133	SCARF2	scavenger receptor class F, member 2, transcript variant X1	yes|up	yes|up	no|up	2
gene11998	LOC106040745	uncharacterized LOC106040745, transcript variant X1	yes|up	yes|up	no|down	2
gene11994	MORN5	MORN repeat containing 5	yes|down	yes|down	no|up	2
gene17442	SLC38A10	solute carrier family 38, member 10	yes|up	yes|up	no|down	2
gene17444	AATK	apoptosis-associated tyrosine kinase	no|down	yes|down	no|down	1
gene18379	LOC106047761	uncharacterized LOC106047761, transcript variant X3	yes|up	yes|up	no|up	2
gene13160	LAMB1	laminin, beta 1	no|up	yes|up	no|up	1
gene17449	NPTX1	neuronal pentraxin I	no|down	yes|down	no|down	1
gene17118	GPC5	glypican 5, transcript variant X1	no|down	yes|down	no|down	1
gene19621	MADCAM1	mucosal vascular addressin cell adhesion molecule 1	yes|down	yes|down	no|up	2
gene10714	GP5	glycoprotein V (platelet)	no|down	yes|down	no|down	1
gene13169	KIF21A	kinesin family member 21A	no|up	yes|up	no|up	1
gene18685	AICDA	activation-induced cytidine deaminase	yes|down	yes|down	no|up	2
gene17531	PTH1R	parathyroid hormone 1 receptor, transcript variant X2	no|up	yes|up	no|up	1
gene471	LOC106033192	neurotrypsin-like, transcript variant X2	no|down	yes|down	yes|down	2
gene3871	AKAP6	A kinase (PRKA) anchor protein 6, transcript variant X7	yes|up	yes|up	no|down	2
gene3875	NPAS3	neuronal PAS domain protein 3	yes|up	yes|up	no|down	2
gene2726	ESRP1	epithelial splicing regulatory protein 1, transcript variant X1	yes|down	yes|down	no|down	2
gene2720	CCNE2	cyclin E2, transcript variant X1	yes|down	yes|down	no|down	2
gene2722	LOC106030627	neural-cadherin-like	no|down	yes|down	no|down	1
gene3016	SGCB	sarcoglycan, beta (43kDa dystrophin-associated glycoprotein), transcript variant X1	yes|up	yes|up	no|up	2
gene6434	LOC106034743	uncharacterized LOC106034743	no|down	yes|down	no|down	1
gene6436	SOX9	SRY (sex determining region Y)-box 9	no|down	yes|down	yes|down	2
gene6430	FAM104A	family with sequence similarity 104, member A, transcript variant X1	no|down	yes|down	no|down	1
gene6432	SSTR2	somatostatin receptor 2	yes|up	yes|up	yes|up	3
gene6433	SLC39A11	solute carrier family 39, member 11	no|up	yes|up	no|up	1
gene3013	CWH43	cell wall biogenesis 43 C-terminal homolog, transcript variant X1	yes|down	yes|down	no|down	2
gene1709	RAB3IP	RAB3A interacting protein, transcript variant X1	no|up	yes|up	no|up	1
gene12105	SLCO4A1	solute carrier organic anion transporter family, member 4A1	yes|down	yes|down	no|down	2
gene9722	ST8SIA1	ST8 alpha-N-acetyl-neuraminide alpha-2,8-sialyltransferase 1, transcript variant X1	no|up	yes|up	no|up	1
gene9725	CMAS	cytidine monophosphate N-acetylneuraminic acid synthetase	no|up	yes|up	no|up	1
gene9727	KCNJ8	potassium channel, inwardly rectifying subfamily J, member 8	no|down	yes|down	no|down	1
gene9726	ABCC9	ATP-binding cassette, sub-family C (CFTR/MRP), member 9	yes|up	yes|up	no|down	2
gene695	SLC34A2	solute carrier family 34 (type II sodium/phosphate cotransporter), member 2, transcript variant X1	yes|down	yes|down	no|down	2
gene691	SEPSECS	Sep (O-phosphoserine) tRNA:Sec (selenocysteine) tRNA synthase, transcript variant X1	no|up	yes|up	no|up	1
gene7392	DEPDC1B	DEP domain containing 1B	yes|down	yes|down	no|up	2
gene7393	ELOVL7	ELOVL fatty acid elongase 7, transcript variant X2	yes|down	yes|down	no|down	2
gene15624	WDR92	WD repeat domain 92, transcript variant X1	yes|down	yes|down	no|down	2
gene15997	CKS2	CDC28 protein kinase regulatory subunit 2	yes|down	yes|down	no|down	2
gene15127	CCDC36	coiled-coil domain containing 36, transcript variant X1	no|down	yes|down	no|down	1
gene15620	PLEK	pleckstrin, transcript variant X1	yes|down	yes|down	no|up	2
gene16535	SPAG17	sperm associated antigen 17, transcript variant X1	yes|up	yes|up	no|up	2
gene16534	TBX15	T-box 15	yes|up	yes|up	no|up	2
gene16533	WARS2	tryptophanyl tRNA synthetase 2, mitochondrial, transcript variant X1	no|up	yes|up	no|up	1
gene12690	MIS12	MIS12 kinetochore complex component	yes|down	yes|down	no|up	2
gene12691	CAMKK1	calcium/calmodulin-dependent protein kinase kinase 1, alpha, transcript variant X4	yes|up	yes|up	no|up	2
gene6388	ZNF804A	zinc finger protein 804A	no|up	yes|up	no|up	1
gene13743	NRP1	neuropilin 1	no|up	yes|up	no|up	1
gene16829	NSMCE1	NSE1 homolog, SMC5-SMC6 complex component, transcript variant X2	no|down	yes|down	no|down	1
gene12165	WEE1	WEE1 G2 checkpoint kinase, transcript variant X3	yes|down	yes|down	no|down	2
gene12161	LOC106040894	uncharacterized LOC106040894	yes|down	yes|down	yes|down	3
gene12162	ADM	adrenomedullin	no|up	yes|down	yes|down	2
gene13343	LOC106042218	protein-glutamine gamma-glutamyltransferase 5-like	yes|down	yes|down	no|down	2
gene18460	C1S	complement component 1, s subcomponent, transcript variant X3	no|down	yes|down	no|down	1
gene12168	TMEM41B	transmembrane protein 41B	no|down	yes|down	no|down	1
gene13345	CCDC102B	coiled-coil domain containing 102B, transcript variant X3	no|up	yes|up	no|up	1
gene15194	LOC106044188	cytochrome P450 1A4-like	yes|up	yes|up	no|up	2
gene12430	LOC106041208	uncharacterized LOC106041208, transcript variant X3	no|up	yes|up	no|up	1
gene12347	GPR12	G protein-coupled receptor 12	yes|up	yes|up	no|down	2
gene15198	SCAMP2	secretory carrier membrane protein 2	no|up	yes|up	no|up	1
gene12341	GTF2I	general transcription factor IIi, transcript variant X1	no|up	yes|up	no|up	1
gene12342	GTF2IRD1	GTF2I repeat domain containing 1, transcript variant X1	no|up	yes|up	no|up	1
gene3099	RERG	RAS-like, estrogen-regulated, growth inhibitor, transcript variant X2	no|up	yes|up	no|up	1
gene3094	DERA	deoxyribose-phosphate aldolase (putative), transcript variant X1	yes|up	yes|up	no|up	2
gene3097	PTPRO	protein tyrosine phosphatase, receptor type, O, transcript variant X1	no|down	yes|down	no|down	1
gene3090	MGST1	microsomal glutathione S-transferase 1, transcript variant X2	no|up	yes|up	no|up	1
gene20823	LOC106029694	toll-like receptor 2 type-1	yes|up	yes|up	no|down	2
gene6251	ATP10B	ATPase, class V, type 10B, transcript variant X1	yes|down	yes|down	no|down	2
gene3418	NOC4L	nucleolar complex associated 4 homolog	no|down	yes|down	no|down	1
gene1520	ANO1	anoctamin 1, calcium activated chloride channel, transcript variant X2	no|down	yes|down	yes|down	2
gene3414	ULK1	unc-51 like autophagy activating kinase 1	no|down	yes|down	no|down	1
gene5716	DNAJA4	DnaJ (Hsp40) homolog, subfamily A, member 4	yes|down	yes|down	yes|down	3
gene5711	DAPK2	death-associated protein kinase 2	no|up	yes|up	yes|up	2
gene5713	CIB2	calcium and integrin binding family member 2, transcript variant X4	yes|down	yes|down	no|down	2
gene3671	RD3	retinal degeneration 3, transcript variant X2	no|up	yes|up	no|up	1
gene3673	NEK2	NIMA-related kinase 2	yes|down	yes|down	no|up	2
gene14572	PTX3	pentraxin 3, long	no|down	yes|down	yes|down	2
gene3679	LOC106031534	uncharacterized LOC106031534, transcript variant X2	no|down	yes|down	no|down	1
gene20205	LOXL2	lysyl oxidase-like 2, transcript variant X5	yes|up	yes|up	no|down	2
gene20201	TNFRSF10B	tumor necrosis factor receptor superfamily, member 10b, transcript variant X1	no|down	yes|down	no|down	1
gene6163	CNTNAP5	contactin associated protein-like 5	yes|up	yes|up	no|up	2
gene6166	LOC106034313	protocadherin Fat 4-like	yes|up	yes|up	no|down	2
gene14978	LOC106043937	transmembrane protease serine 11E-like	no|down	yes|down	no|down	1
gene14975	UGT2B17	UDP glucuronosyltransferase 2 family, polypeptide B17, transcript variant X3	no|down	yes|down	no|down	1
gene14973	LOC106043981	sulfotransferase 1 family member D1-like	no|down	yes|down	no|down	1
gene2935	RRM2	ribonucleotide reductase M2	yes|down	yes|down	no|up	2
gene7416	ADAMTS6	ADAM metallopeptidase with thrombospondin type 1 motif, 6, transcript variant X3	yes|up	yes|up	no|up	2
gene7411	RNF180	ring finger protein 180, transcript variant X1	no|up	yes|up	yes|up	2
gene7410	HTR1A	5-hydroxytryptamine (serotonin) receptor 1A, G protein-coupled	no|down	yes|down	yes|down	2
gene18910	LOC106048337	uncharacterized LOC106048337	no|up	yes|up	no|up	1
gene4218	MAP2K3	mitogen-activated protein kinase kinase 3	no|down	yes|down	no|down	1
gene5537	TMEM184A	transmembrane protein 184A, transcript variant X2	no|down	yes|down	no|down	1
gene5530	GPER1	G protein-coupled estrogen receptor 1, transcript variant X1	yes|down	yes|down	no|down	2
gene7753	FAM69C	family with sequence similarity 69, member C	yes|up	yes|up	no|up	2
gene14391	LOC106043342	transmembrane protein 2-like	no|up	yes|down	yes|down	2
gene14392	CEMIP	cell migration inducing protein, hyaluronan binding	no|down	yes|down	yes|down	2
gene14394	MESDC1	mesoderm development candidate 1	no|down	yes|down	no|down	1
gene6949	SLC7A2	solute carrier family 7 (cationic amino acid transporter, y+ system), member 2, transcript variant X2	no|up	yes|up	no|up	1
gene6943	MICU3	mitochondrial calcium uptake family, member 3	yes|up	yes|up	no|up	2
gene8665	BRINP1	bone morphogenetic protein/retinoic acid inducible neural-specific 1, transcript variant X1	no|down	yes|down	no|down	1
gene14022	KANK1	KN motif and ankyrin repeat domains 1, transcript variant X2	no|up	yes|up	no|up	1
gene14021	DOCK8	dedicator of cytokinesis 8	yes|down	yes|down	no|up	2
gene8803	PRKCH	protein kinase C, eta	no|down	yes|down	no|down	1
gene10875	CCDC18	coiled-coil domain containing 18, transcript variant X1	yes|up	yes|up	no|up	2
gene8809	LOC106037217	uncharacterized LOC106037217, transcript variant X4	no|up	yes|up	no|up	1
gene8808	SYT16	synaptotagmin XVI, transcript variant X9	yes|up	yes|up	no|up	2
gene5146	HSD11B2	hydroxysteroid (11-beta) dehydrogenase 2	yes|down	yes|down	no|down	2
gene11879	PKNOX2	PBX/knotted 1 homeobox 2	no|up	yes|up	no|up	1
gene11875	ROBO4	roundabout guidance receptor 4, transcript variant X1	no|up	yes|up	no|up	1
gene11872	ESAM	endothelial cell adhesion molecule	no|up	yes|up	no|up	1
gene11870	PANX3	pannexin 3, transcript variant X1	yes|down	yes|down	no|down	2
gene8482	ACAA1	acetyl-CoA acyltransferase 1	yes|up	yes|up	no|down	2
gene8260	ISM1	isthmin 1, angiogenesis inhibitor	no|up	yes|up	no|up	1
gene8487	OXSR1	oxidative stress responsive 1	no|down	yes|down	no|down	1
gene2876	TCF24	transcription factor 24	yes|down	yes|down	no|down	2
gene18126	POLE	polymerase (DNA directed), epsilon, catalytic subunit	yes|down	yes|down	no|up	2
gene2877	LOC106030621	uncharacterized LOC106030621, transcript variant X2	no|down	yes|down	no|down	1
gene6892	VWA8	von Willebrand factor A domain containing 8, transcript variant X1	yes|up	yes|up	no|up	2
gene18120	LOC106047476	uncharacterized LOC106047476	no|down	yes|down	no|down	1
gene17612	ARHGAP27	Rho GTPase activating protein 27	yes|down	yes|down	no|up	2
gene10476	LOC106039065	transmembrane protein 68-like, transcript variant X1	no|down	yes|down	no|up	1
gene11478	ARHGEF10L	Rho guanine nucleotide exchange factor (GEF) 10-like	no|up	yes|up	no|up	1
gene19433	LOC106048913	collagen alpha-1(I) chain-like, transcript variant X2	yes|down	yes|down	no|up	2
gene10450	LOC106039008	uncharacterized LOC106039008, transcript variant X1	yes|up	yes|up	no|up	2
gene11472	ATP13A2	ATPase type 13A2	yes|down	yes|down	no|up	2
gene7944	NYAP2	neuronal tyrosine-phosphorylated phosphoinositide-3-kinase adaptor 2, transcript variant X2	yes|down	yes|down	no|down	2
gene17435	LOC106046705	uncharacterized LOC106046705, transcript variant X2	no|down	yes|down	yes|down	2
gene17125	GLDC	glycine dehydrogenase (decarboxylating)	no|up	yes|up	no|up	1
gene17431	LOC106046714	uncharacterized LOC106046714	yes|up	yes|up	no|down	2
gene19935	LOC106049425	kallikrein-8-like	yes|down	yes|down	no|up	2
gene862	B4GALT4	UDP-Gal:betaGlcNAc beta 1,4- galactosyltransferase, polypeptide 4, transcript variant X2	no|up	yes|up	no|up	1
gene18694	KLRG1	killer cell lectin-like receptor subfamily G, member 1, transcript variant X1	yes|down	yes|down	no|up	2
gene6762	APCDD1	adenomatosis polyposis coli down-regulated 1	yes|down	yes|down	no|down	2
gene8821	LOC106037195	uncharacterized LOC106037195	yes|down	yes|down	no|down	2
gene18698	LOC106048077	alpha-2-macroglobulin-like	yes|up	yes|up	no|down	2
gene18699	LOC106048085	uncharacterized LOC106048085	no|up	yes|up	no|up	1
gene462	AP3M1	adaptor-related protein complex 3, mu 1 subunit	yes|down	yes|down	no|down	2
gene9535	CDCA8	cell division cycle associated 8	yes|down	yes|down	no|up	2
gene9824	PQLC1	PQ loop repeat containing 1	no|down	yes|down	no|down	1
gene9825	HSBP1L1	heat shock factor binding protein 1-like 1	yes|down	yes|down	no|up	2
gene3847	NOVA1	neuro-oncological ventral antigen 1, transcript variant X2	no|up	yes|up	no|up	1
gene9285	FRMPD3	FERM and PDZ domain containing 3, transcript variant X1	yes|down	yes|down	no|down	2
gene3842	ACTC1	actin, alpha, cardiac muscle 1	yes|up	yes|up	no|up	2
gene2739	RBM12B	RNA binding motif protein 12B	yes|down	yes|down	no|down	2
gene2738	TMEM67	transmembrane protein 67	yes|up	yes|up	no|up	2
gene2731	GEM	GTP binding protein overexpressed in skeletal muscle	yes|up	yes|up	no|up	2
gene2730	FSBP	fibrinogen silencer binding protein	no|up	yes|up	yes|up	2
gene6427	CDC42EP4	CDC42 effector protein (Rho GTPase binding) 4	no|up	yes|down	yes|down	2
gene4941	ROR1	receptor tyrosine kinase-like orphan receptor 1, transcript variant X4	yes|up	yes|up	no|down	2
gene9529	SNIP1	Smad nuclear interacting protein 1	no|down	yes|down	no|down	1
gene6421	LOC106034495	chromosome unknown open reading frame, human C2orf88, transcript variant X2	yes|up	yes|up	no|up	2
gene1739	HMGA2	high mobility group AT-hook 2, transcript variant X1	no|down	yes|down	no|down	1
gene13178	LOC106042035		no|up	yes|up	no|up	1
gene9750	PPFIBP1	PTPRF interacting protein, binding protein 1 (liprin beta 1)	yes|up	yes|up	no|up	2
gene13170	LOC106042005	sucrase-isomaltase, intestinal-like	no|up	yes|up	no|up	1
gene685	CCDC149	coiled-coil domain containing 149, transcript variant X1	yes|up	yes|up	no|up	2
gene686	SOD3	superoxide dismutase 3, extracellular, transcript variant X2	yes|up	yes|up	no|down	2
gene687	LOC106035850	uncharacterized LOC106035850	yes|up	yes|up	no|up	2
gene9759	LOC106038249	uncharacterized LOC106038249	yes|down	yes|down	no|up	2
gene15613	RHOB	ras homolog family member B	no|down	yes|down	no|down	1
gene7384	SETD9	SET domain containing 9	no|up	yes|up	no|up	1
gene7387	GPBP1	GC-rich promoter binding protein 1, transcript variant X2	no|down	yes|down	no|down	1
gene5853	PLEKHA7	pleckstrin homology domain containing, family A member 7, transcript variant X1	yes|down	yes|down	no|up	2
gene15614	LOC106044678	ras-like GTP-binding protein rhoA, transcript variant X1	no|up	yes|down	yes|down	2
gene15968	TMEM43	transmembrane protein 43	yes|up	yes|up	no|up	2
gene16522	DOT1L	DOT1-like histone H3K79 methyltransferase	no|up	yes|down	yes|down	2
gene13750	ARHGAP12	Rho GTPase activating protein 12, transcript variant X1	no|up	yes|up	no|up	1
gene13751	ZEB1	zinc finger E-box binding homeobox 1, transcript variant X1	yes|up	yes|up	no|up	2
gene13759	KIAA1462	KIAA1462 ortholog, transcript variant X1	no|up	yes|up	no|up	1
gene6972	SORBS2	sorbin and SH3 domain containing 2, transcript variant X1	yes|up	yes|up	no|up	2
gene18476	CD4	CD4 molecule, transcript variant X2	yes|down	yes|down	no|up	2
gene18477	LAG3	lymphocyte-activation gene 3	yes|down	yes|down	no|down	2
gene18472	CDCA3	cell division cycle associated 3	yes|down	yes|down	no|up	2
gene3468	SDF2L1	stromal cell-derived factor 2-like 1	no|down	yes|down	no|down	1
gene3463	LOC106031264	uncharacterized LOC106031264, transcript variant X2	yes|up	yes|up	no|down	2
gene17581	TNFAIP6	tumor necrosis factor, alpha-induced protein 6, transcript variant X1	no|up	yes|down	yes|down	2
gene5700	TLN2	talin 2, transcript variant X1	yes|up	yes|up	no|up	2
gene14563	LOC106043511	ovocalyxin-32-like	no|down	yes|down	no|down	1
gene14560	LOC106043549	uncharacterized LOC106043549, transcript variant X2	no|down	yes|down	no|down	1
gene7568	ASCL4	achaete-scute family bHLH transcription factor 4	yes|down	yes|down	no|down	2
gene3603	TBX3	T-box 3	yes|up	yes|up	no|up	2
gene3608	SLC3A1	solute carrier family 3 (amino acid transporter heavy chain), member 1, transcript variant X1	no|down	yes|down	no|down	1
gene16702	IGFBP2	insulin-like growth factor binding protein 2, 36kDa, transcript variant X1	yes|up	yes|up	no|up	2
gene19988	GMIP	GEM interacting protein	yes|down	yes|down	no|down	2
gene16708	PECR	peroxisomal trans-2-enoyl-CoA reductase, transcript variant X1	no|up	yes|up	no|up	1
gene16709	TMEM169	transmembrane protein 169	no|up	yes|up	no|up	1
gene14962	MOB1B	MOB kinase activator 1B, transcript variant X1	no|down	yes|down	yes|down	2
gene14963	DCK	deoxycytidine kinase	yes|down	yes|down	no|up	2
gene7627	GCAT	glycine C-acetyltransferase	yes|up	yes|up	no|up	2
gene7624	NOL12	nucleolar protein 12	no|down	yes|down	no|down	1
gene14706	LOC106043702	uncharacterized LOC106043702	no|up	yes|up	no|up	1
gene15380	LOC106044418	uncharacterized LOC106044418	yes|up	yes|up	no|up	2
gene15387	DUSP26	dual specificity phosphatase 26 (putative)	no|up	yes|up	no|up	1
gene15389	TTI2	TELO2 interacting protein 2	yes|down	yes|down	no|up	2
gene15388	RNF122	ring finger protein 122, transcript variant X1	no|up	yes|up	no|up	1
gene18900	ABI3	ABI family, member 3	yes|down	yes|down	no|up	2
gene7623	LOC106035938	arf-GAP with dual PH domain-containing protein 1-like	yes|down	yes|down	no|down	2
gene14050	CYSLTR1	cysteinyl leukotriene receptor 1, transcript variant X1	no|down	yes|down	no|down	1
gene2759	DECR1	2,4-dienoyl CoA reductase 1, mitochondrial, transcript variant X1	no|up	yes|up	no|up	1
gene5527	LOC106033532	cytochrome P450 2W1-like	no|down	yes|down	no|down	1
gene5526	LOC106033533	cytochrome P450 2W1-like	no|down	yes|down	no|up	1
gene14389	ARNT2	aryl-hydrocarbon receptor nuclear translocator 2, transcript variant X2	no|up	yes|up	no|up	1
gene11282	AQP11	aquaporin 11, transcript variant X1	no|down	yes|down	no|down	1
gene5520	PRKAR1B	protein kinase, cAMP-dependent, regulatory, type I, beta, transcript variant X1	no|up	yes|up	no|up	1
gene4037	PLEKHS1	pleckstrin homology domain containing, family S member 1, transcript variant X2	no|down	yes|down	no|down	1
gene4032	TCF7L2	transcription factor 7-like 2 (T-cell specific, HMG-box)	yes|up	yes|up	no|up	2
gene14384	BCL2A1	BCL2-related protein A1	yes|down	yes|down	no|up	2
gene20639	LOC106029500	uncharacterized LOC106029500, transcript variant X1	no|down	yes|down	no|down	1
gene20638	LOC106029497	uncharacterized LOC106029497, transcript variant X1	yes|down	yes|down	no|up	2
gene20630	LOC106029492	B-cell receptor CD22-like	yes|down	yes|down	no|up	2
gene20633	LOC106029495	mucin-3B-like	no|down	yes|down	yes|down	2
gene6953	FGL1	fibrinogen-like 1, transcript variant X3	yes|up	yes|up	no|up	2
gene6952	LOC106035236	uncharacterized LOC106035236	yes|up	yes|up	no|up	2
gene1286	ANKRD60	ankyrin repeat domain 60, transcript variant X1	no|down	yes|down	no|down	1
gene4151	MCCC1	methylcrotonoyl-CoA carboxylase 1 (alpha), transcript variant X1	no|up	yes|up	no|up	1
gene4152	LAMP3	lysosomal-associated membrane protein 3	yes|down	yes|down	no|up	2
gene4154	B3GNT5	UDP-GlcNAc:betaGal beta-1,3-N-acetylglucosaminyltransferase 5, transcript variant X3	no|down	yes|down	no|down	1
gene8653	SLC25A25	solute carrier family 25 (mitochondrial carrier; phosphate carrier), member 25, transcript variant X1	no|down	yes|down	no|down	1
gene7603	MPST	mercaptopyruvate sulfurtransferase	no|up	yes|up	yes|up	2
gene7604	KCTD17	potassium channel tetramerization domain containing 17, transcript variant X1	no|down	yes|up	yes|up	2
gene11608	CLSTN2	calsyntenin 2	yes|up	yes|up	no|up	2
gene10808	PLCD4	phospholipase C, delta 4	yes|up	yes|up	no|up	2
gene1358	LOC106042968	cytosolic phospholipase A2 epsilon-like	no|down	yes|down	no|down	1
gene1359	LOC106042978	cytosolic phospholipase A2 epsilon-like, transcript variant X1	no|down	yes|down	no|down	1
gene17608	CD79B	CD79b molecule, immunoglobulin-associated beta, transcript variant X1	yes|down	yes|down	no|up	2
gene18118	LOC106047475	chromosome unknown open reading frame, human C11orf85, transcript variant X1	yes|down	yes|down	no|down	2
gene1356	PLA2G4F	phospholipase A2, group IVF	no|down	yes|down	no|down	1
gene11465	EPHA2	EPH receptor A2	no|down	yes|down	no|down	1
gene17423	STX8	syntaxin 8	no|up	yes|up	no|up	1
gene10738	LCT	lactase	no|down	yes|down	no|down	1
gene10737	MCM6	minichromosome maintenance complex component 6	yes|down	yes|down	no|up	2
gene19609	LOC106049106	uncharacterized LOC106049106	yes|down	yes|down	no|up	2
gene10735	CXCR4	chemokine (C-X-C motif) receptor 4	yes|down	yes|down	no|down	2
gene10732	THSD7B	thrombospondin, type I, domain containing 7B, transcript variant X1	no|down	yes|down	yes|down	2
gene10731	LOC106039326	histamine N-methyltransferase A-like, transcript variant X1	no|down	yes|down	no|down	1
gene6777	SLMO1	slowmo homolog 1 (Drosophila), transcript variant X1	no|down	yes|down	yes|down	2
gene6775	TUBB6	tubulin, beta 6 class V	no|up	yes|down	yes|down	2
gene4803	KLHL3	kelch-like family member 3	no|down	yes|up	yes|up	2
gene9522	CSF3R	colony stimulating factor 3 receptor (granulocyte)	no|up	yes|down	yes|down	2
gene9293	BTK	Bruton agammaglobulinemia tyrosine kinase	yes|down	yes|down	no|up	2
gene9520	OSCP1	organic solute carrier partner 1	no|up	yes|up	no|up	1
gene459	KAT6B	K(lysine) acetyltransferase 6B	yes|up	yes|up	no|up	2
gene9830	RBFA	ribosome binding factor A (putative)	yes|down	yes|down	no|down	2
gene3857	PRKD1	protein kinase D1	no|down	yes|down	no|down	1
gene455	LOC106033034	dual specificity protein phosphatase 13 isoform B-like	no|down	yes|down	no|down	1
gene8833	HSPA2	heat shock 70kDa protein 2	no|down	yes|down	yes|down	2
gene7822	RIPK4	receptor-interacting serine-threonine kinase 4	yes|down	yes|down	no|down	2
gene322	DNAJC12	DnaJ (Hsp40) homolog, subfamily C, member 12	yes|down	yes|down	no|down	2
gene8347	IRAK2	interleukin-1 receptor-associated kinase 2	no|up	yes|down	yes|down	2
gene145	WDFY4	WDFY family member 4, transcript variant X2	yes|down	yes|down	no|up	2
gene144	VSTM4	V-set and transmembrane domain containing 4	yes|down	yes|down	no|down	2
gene6416	ORMDL1	ORMDL sphingolipid biosynthesis regulator 1, transcript variant X1	yes|up	yes|up	no|up	2
gene6415	OSGEPL1	O-sialoglycoprotein endopeptidase-like 1, transcript variant X1	no|up	yes|up	no|up	1
gene16951	LOC106046139	ras-associated and pleckstrin homology domains-containing protein 1-like	yes|down	yes|down	no|up	2
gene16950	KIF21B	kinesin family member 21B	yes|down	yes|down	no|up	2
gene16952	ELF3	E74-like factor 3 (ets domain transcription factor, epithelial-specific)	no|down	yes|down	no|down	1
gene13109	FAM102B	family with sequence similarity 102, member B, transcript variant X1	no|up	yes|down	yes|down	2
gene13108	SLC25A24	solute carrier family 25 (mitochondrial carrier; phosphate carrier), member 24	no|up	yes|down	yes|down	2
gene16957	LOC106046179	receptor-type tyrosine-protein phosphatase V-like	no|up	yes|up	no|up	1
gene9740	SSPN	sarcospan	yes|up	yes|up	no|up	2
gene18954	LOC106048394	uncharacterized LOC106048394	yes|down	yes|down	no|down	2
gene10548	LOC106039127	uncharacterized LOC106039127	yes|down	yes|down	no|down	2
gene17135	PDCD1LG2	programmed cell death 1 ligand 2, transcript variant X1	yes|down	yes|down	no|down	2
gene17136	LOC106046390	programmed cell death 1 ligand 1-like, transcript variant X3	yes|down	yes|down	no|down	2
gene15605	TDRD15	tudor domain containing 15	yes|up	yes|up	no|up	2
gene15977	SLC41A3	solute carrier family 41, member 3, transcript variant X4	no|up	yes|up	no|up	1
gene15979	LOC106045055	uncharacterized LOC106045055, transcript variant X2	no|down	yes|down	no|down	1
gene15608	LDAH	lipid droplet associated hydrolase, transcript variant X1	no|up	yes|up	no|up	1
gene16553	GTF2E1	general transcription factor IIE, polypeptide 1, alpha 56kDa	no|up	yes|up	no|up	1
gene13726	LOC106042626	cytosolic 5'-nucleotidase 1A-like, transcript variant X2	yes|down	yes|down	no|up	2
gene2359	ALS2	amyotrophic lateral sclerosis 2 (juvenile), transcript variant X2	no|up	yes|up	no|up	1
gene8212	UPP1	uridine phosphorylase 1, transcript variant X2	no|down	yes|down	no|down	1
gene18486	LPAR5	lysophosphatidic acid receptor 5, transcript variant X4	yes|down	yes|down	no|up	2
gene12412	LOC106041201	uncharacterized LOC106041201	no|down	yes|down	no|down	1
gene12417	LOC106041222	lipopolysaccharide-induced tumor necrosis factor-alpha factor homolog	yes|down	yes|down	no|down	2
gene2078	SIX2	SIX homeobox 2	yes|up	yes|up	no|up	2
gene2076	SRBD1	S1 RNA binding domain 1, transcript variant X2	yes|up	yes|up	no|up	2
gene1504	CAT	catalase	yes|up	yes|up	yes|up	3
gene3476	SERPIND1	serpin peptidase inhibitor, clade D (heparin cofactor), member 1, transcript variant X2	yes|up	yes|up	no|down	2
gene5867	PTPRF	protein tyrosine phosphatase, receptor type, F, transcript variant X1	yes|down	yes|down	no|down	2
gene5733	SERPING1	serpin peptidase inhibitor, clade G (C1 inhibitor), member 1	no|down	yes|down	no|down	1
gene5731	SLC43A3	solute carrier family 43, member 3, transcript variant X1	yes|up	yes|up	no|up	2
gene3617	PLEKHH2	pleckstrin homology domain containing, family H (with MyTH4 domain) member 2, transcript variant X2	yes|up	yes|up	no|down	2
gene7597	PVALB	parvalbumin, transcript variant X1	no|up	yes|up	no|up	1
gene7598	NCF4	neutrophil cytosolic factor 4, 40kDa	yes|down	yes|down	no|up	2
gene7599	LOC106035885	cytokine receptor common subunit beta-like	no|down	yes|down	no|down	1
gene20461	ADRBK1	adrenergic, beta, receptor kinase 1	yes|down	yes|down	no|down	2
gene19992	LOC106049484	uncharacterized LOC106049484	yes|down	yes|down	no|down	2
gene6186	SLC23A1	solute carrier family 23 (ascorbic acid transporter), member 1	yes|down	yes|down	no|up	2
gene6189	LOC106034340	uncharacterized LOC106034340	yes|down	yes|down	no|up	2
gene14952	NUP54	nucleoporin 54kDa	yes|down	yes|down	no|down	2
gene15397	LOC106044391	uncharacterized LOC106044391	no|down	yes|down	no|down	1
gene20089	DDIT3	DNA-damage-inducible transcript 3	yes|down	yes|down	no|down	2
gene20087	ARHGAP9	Rho GTPase activating protein 9	yes|down	yes|down	no|up	2
gene20084	COL2A1	collagen, type II, alpha 1	no|down	yes|down	yes|down	2
gene20085	SENP1	SUMO1/sentrin specific peptidase 1	no|down	yes|down	no|down	1
gene20082	VDR	vitamin D (1,25- dihydroxyvitamin D3) receptor	no|down	yes|down	yes|down	2
gene780	LGMN	legumain, transcript variant X1	no|up	yes|up	no|up	1
gene3299	SH2B3	SH2B adaptor protein 3	no|down	yes|down	no|down	1
gene3293	LOC106031105	disintegrin and metalloproteinase domain-containing protein 9-like	no|down	yes|down	no|down	1
gene3292	LOC106031104	disintegrin and metalloproteinase domain-containing protein 20-like	no|down	yes|down	no|down	1
gene3291	TMEM116	transmembrane protein 116	no|up	yes|up	yes|up	2
gene3295	ALDH2	aldehyde dehydrogenase 2 family (mitochondrial)	yes|up	yes|up	no|up	2
gene95	CEP55	centrosomal protein 55kDa	yes|down	yes|down	no|up	2
gene4021	ADRA2A	adrenoceptor alpha 2A	no|down	yes|down	yes|down	2
gene4023	LOC106031885	uncharacterized LOC106031885	no|down	yes|down	no|down	1
gene4029	ACSL5	acyl-CoA synthetase long-chain family member 5, transcript variant X1	yes|down	yes|down	no|up	2
gene2883	LOC106030669	chromosome unknown open reading frame, human C8orf46	no|up	yes|up	no|up	1
gene2882	MYBL1	v-myb avian myeloblastosis viral oncogene homolog-like 1, transcript variant X1	yes|down	yes|down	no|up	2
gene20406	LOC106049923	uncharacterized LOC106049923	no|down	yes|down	no|down	1
gene20407	LOC106049920	uncharacterized LOC106049920	yes|down	yes|down	no|down	2
gene20405	LOC106049922	HLA class II histocompatibility antigen, DR alpha chain	yes|down	yes|down	no|down	2
gene1298	LOC106042203	uncharacterized LOC106042203	no|down	yes|down	no|up	1
gene20628	LOC106029489	free fatty acid receptor 3-like	no|down	yes|down	no|down	1
gene6965	MTNR1A	melatonin receptor 1A, transcript variant X1	yes|down	yes|down	no|up	2
gene6969	LOC106035235	cytochrome P450 4V2	yes|up	yes|up	no|up	2
gene20624	LOC106029484	amiloride-sensitive sodium channel subunit alpha-like	no|down	yes|down	no|down	1
gene8132	MCTP2	multiple C2 domains, transmembrane 2, transcript variant X4	no|down	yes|down	no|down	1
gene7610	RAC2	ras-related C3 botulinum toxin substrate 2 (rho family, small GTP binding protein Rac2)	yes|down	yes|down	no|up	2
gene14041	LOC106043005	uncharacterized LOC106043005	yes|down	yes|down	no|up	2
gene7615	CARD10	caspase recruitment domain family, member 10	no|down	yes|down	no|down	1
gene7614	MFNG	MFNG O-fucosylpeptide 3-beta-N-acetylglucosaminyltransferase, transcript variant X1	yes|down	yes|down	no|up	2
gene7619	SH3BP1	SH3-domain binding protein 1	yes|down	yes|down	no|up	2
gene8648	CCT8	chaperonin containing TCP1, subunit 8 (theta)	yes|down	yes|down	no|down	2
gene11676	LOC106040353	phospholipid-transporting ATPase IB-like	yes|down	yes|down	no|down	2
gene3537	LOC106031329	melanotransferrin-like, transcript variant X3	yes|up	yes|up	no|up	2
gene10811	LOC106039322	villin-1-like	no|down	yes|down	no|down	1
gene11812	PIM3	Pim-3 proto-oncogene, serine/threonine kinase	no|up	yes|down	yes|down	2
gene9199	SOWAHD	sosondowah ankyrin repeat domain family member D	yes|down	yes|down	no|up	2
gene13482	KCNE3	potassium channel, voltage gated subfamily E regulatory beta subunit 3	yes|down	yes|down	no|down	2
gene18107	ALPK3	alpha-kinase 3	yes|up	yes|up	no|up	2
gene19459	IRF5	interferon regulatory factor 5	yes|down	yes|down	no|down	2
gene18101	LOC106047427	dual oxidase maturation factor 1-like	no|down	yes|down	no|down	1
gene1341	PTGR2	prostaglandin reductase 2, transcript variant X2	no|up	yes|up	no|up	1
gene19456	FLNC	filamin C, gamma	no|up	yes|down	yes|down	2
gene1347	STARD9	StAR-related lipid transfer (START) domain containing 9	no|up	yes|up	no|up	1
gene19453	GCK	glucokinase (hexokinase 4)	no|down	yes|down	yes|down	2
gene13485	CHRDL2	chordin-like 2	no|up	yes|up	no|up	1
gene6992	ENPP6	ectonucleotide pyrophosphatase/phosphodiesterase 6	no|up	yes|up	no|up	1
gene10720	OPA1	optic atrophy 1 (autosomal dominant)	yes|up	yes|up	no|up	2
gene10721	ATP13A4	ATPase type 13A4, transcript variant X7	no|up	yes|up	no|up	1
gene19677	CNTNAP4	contactin associated protein-like 4, transcript variant X1	yes|down	yes|down	no|down	2
gene10723	HRASLS	HRAS-like suppressor, transcript variant X1	yes|up	yes|up	no|up	2
gene19671	WNT4	wingless-type MMTV integration site family, member 4	yes|down	yes|down	no|down	2
gene10726	NXPH2	neurexophilin 2	no|up	yes|up	no|up	1
gene9991	DEPTOR	DEP domain containing MTOR-interacting protein	no|up	yes|up	yes|up	2
gene9997	MAL2	mal, T-cell differentiation protein 2	yes|down	yes|down	no|up	2
gene6749	PTPRM	protein tyrosine phosphatase, receptor type, M, transcript variant X1	yes|up	yes|up	no|up	2
gene6744	ARHGAP28	Rho GTPase activating protein 28, transcript variant X1	no|up	yes|up	no|up	1
gene5290	ADAMTS18	ADAM metallopeptidase with thrombospondin type 1 motif, 18, transcript variant X1	yes|up	yes|up	no|up	2
gene5292	NUDT7	nudix (nucleoside diphosphate linked moiety X)-type motif 7	no|up	yes|up	no|up	1
gene4833	LOC106032673	deoxycytidine kinase-like	yes|down	yes|down	no|up	2
gene4830	ADAMTS2	ADAM metallopeptidase with thrombospondin type 1 motif, 2, transcript variant X2	yes|up	yes|up	no|up	2
gene4565	TNFAIP3	tumor necrosis factor, alpha-induced protein 3, transcript variant X1	no|down	yes|down	yes|down	2
gene440	DLG5	discs, large homolog 5 (Drosophila), transcript variant X1	yes|up	yes|up	no|up	2
gene3828	SCG5	secretogranin V	no|up	yes|up	no|up	1
gene3829	ARHGAP11A	Rho GTPase activating protein 11A, transcript variant X1	yes|down	yes|down	no|up	2
gene9518	LOC106037961	uncharacterized LOC106037961	yes|up	yes|up	no|no test	2
gene9519	STK40	serine/threonine kinase 40	no|down	yes|down	yes|down	2
gene7473	JADE3	jade family PHD finger 3, transcript variant X1	no|down	yes|down	no|down	1
gene2241	LOC106030007	uncharacterized LOC106030007, transcript variant X1	no|down	yes|down	no|down	1
gene157	ANXA8L1	annexin A8-like 1, transcript variant X5	yes|down	yes|down	no|up	2
gene158	LOC106048153	neuropeptide Y receptor type 4-like	yes|up	yes|up	no|up	2
gene7471	SLC9A7	solute carrier family 9, subfamily A (NHE7, cation proton antiporter 7), member 7, transcript variant X1	yes|down	yes|down	no|up	2
gene6400	LOC106034543	uncharacterized LOC106034543	yes|up	yes|up	no|down	2
gene17099	METTL22	methyltransferase like 22, transcript variant X4	no|up	yes|up	no|up	1
gene1753	LOC106045444		yes|down	yes|down	no|down	2
gene14223	LOC106043205	disintegrin and metalloproteinase domain-containing protein 33-like	yes|down	yes|down	no|up	2
gene9772	PARVB	parvin, beta, transcript variant X1	no|up	yes|up	no|up	1
gene9774	KIAA1644	KIAA1644 ortholog, transcript variant X7	no|up	yes|up	yes|up	2
gene16946	LOC106046136	serine/threonine-protein kinase pim-1-like	yes|down	yes|down	yes|down	3
gene15313	EPDR1	ependymin related 1	yes|up	yes|up	no|down	2
gene17145	LOC106046397	guanylate-binding protein 3-like	yes|down	yes|down	no|down	2
gene13117	WDR47	WD repeat domain 47	no|down	yes|down	no|down	1
gene17411	CLGN	calmegin, transcript variant X3	yes|down	yes|down	no|up	2
gene15946	EPB41L4B	erythrocyte membrane protein band 4.1 like 4B	yes|down	yes|down	no|down	2
gene12643	RFFL	ring finger and FYVE-like domain containing E3 ubiquitin protein ligase, transcript variant X1	yes|down	yes|down	no|down	2
gene15943	MOCOS	molybdenum cofactor sulfurase, transcript variant X1	yes|up	yes|up	no|up	2
gene16548	CTC1	CTS telomere maintenance complex component 1, transcript variant X1	yes|down	yes|down	no|down	2
gene12646	LOC106041493	schlafen family member 13-like, transcript variant X4	yes|down	yes|down	no|down	2
gene16546	TRIM45	tripartite motif containing 45	no|up	yes|up	no|up	1
gene17896	AJAP1	adherens junctions associated protein 1	no|down	yes|down	no|down	1
gene17892	LOC106047241	chromosome unknown open reading frame, human C1orf174, transcript variant X1	no|up	yes|up	no|up	1
gene17890	CEP104	centrosomal protein 104kDa, transcript variant X2	yes|up	yes|up	no|down	2
gene18620	LOC106048003	heat shock protein beta-11-like	no|down	yes|down	yes|down	2
gene12192	PDE3B	phosphodiesterase 3B, cGMP-inhibited	yes|down	yes|down	no|down	2
gene18496	SCNN1A	sodium channel, non voltage gated 1 alpha subunit	no|up	yes|up	yes|up	2
gene12197	SRC	SRC proto-oncogene, non-receptor tyrosine kinase	no|up	yes|down	yes|down	2
gene12391	N4BP2L2	NEDD4 binding protein 2-like 2	yes|up	yes|up	no|up	2
gene19894	LOC106049387	small EDRK-rich factor 1-like	no|down	yes|down	no|down	1
gene3047	BCL2L14	BCL2-like 14 (apoptosis facilitator), transcript variant X2	no|down	yes|down	no|down	1
gene1574	LOC106045879	uncharacterized LOC106045879	yes|up	yes|up	no|up	2
gene1575	LOC106045840	histone H2A.J	yes|up	yes|up	no|down	2
gene1571	LOC106045128	uncharacterized LOC106045128	yes|up	yes|up	no|up	2
gene3445	TXNRD2	thioredoxin reductase 2	no|up	yes|up	no|up	1
gene5877	CFAP57	cilia and flagella associated protein 57, transcript variant X1	no|up	yes|up	no|up	1
gene5871	ELOVL1	ELOVL fatty acid elongase 1	no|up	yes|down	yes|down	2
gene5872	CDC20	cell division cycle 20	yes|down	yes|down	no|up	2
gene5721	HYKK	hydroxylysine kinase	yes|up	yes|up	no|up	2
gene14542	SPTSSB	serine palmitoyltransferase, small subunit B	no|down	yes|down	no|up	1
gene496	LOC106033965	T-cell surface glycoprotein CD8 beta chain-like	yes|down	yes|down	no|up	2
gene12069	RGS19	regulator of G-protein signaling 19	yes|down	yes|down	no|up	2
gene7584	HMOX1	heme oxygenase 1	no|down	yes|down	yes|down	2
gene12063	UCKL1	uridine-cytidine kinase 1-like 1	yes|down	yes|down	no|up	2
gene16763	ITGB3	integrin, beta 3 (platelet glycoprotein IIIa, antigen CD61), transcript variant X1	no|down	yes|down	yes|down	2
gene14944	LOC106043950	16 kDa beta-galactoside-binding lectin	yes|up	yes|up	no|up	2
gene14947	LOC106043945	uncharacterized LOC106043945, transcript variant X1	yes|down	yes|down	no|up	2
gene14941	CCNI	cyclin I, transcript variant X1	no|up	yes|up	no|up	1
gene15493	DIO2	deiodinase, iodothyronine, type II, transcript variant X1	no|up	yes|down	yes|down	2
gene14722	FAM135B	family with sequence similarity 135, member B, transcript variant X1	no|down	yes|down	no|down	1
gene4584	FAM26E	family with sequence similarity 26, member E	no|up	yes|up	no|up	1
gene4580	CITED2	Cbp/p300-interacting transactivator, with Glu/Asp-rich carboxy-terminal domain, 2	yes|up	yes|up	yes|up	3
gene88	HHEX	hematopoietically expressed homeobox	no|down	yes|down	no|down	1
gene86	KIF11	kinesin family member 11, transcript variant X1	yes|down	yes|down	no|up	2
gene9334	CTPS2	CTP synthase 2, transcript variant X6	no|up	yes|up	no|up	1
gene5508	NPTX2	neuronal pentraxin II	no|up	yes|up	yes|up	2
gene5505	BAIAP2L1	BAI1-associated protein 2-like 1	yes|up	yes|up	yes|up	3
gene4055	LOC106031936	pancreatic lipase-related protein 2-like	yes|down	yes|down	no|down	2
gene9339	REPS2	RALBP1 associated Eps domain containing 2	yes|up	yes|up	no|up	2
gene4052	ATRNL1	attractin-like 1, transcript variant X1	yes|up	yes|up	no|down	2
gene4053	GFRA1	GDNF family receptor alpha 1, transcript variant X3	no|down	yes|down	no|up	1
gene15231	RSPH3	radial spoke 3 homolog (Chlamydomonas)	no|up	yes|up	no|up	1
gene15230	TAGAP	T-cell activation RhoGTPase activating protein	yes|down	yes|down	no|up	2
gene1990	TJAP1	tight junction associated protein 1 (peripheral), transcript variant X1	no|down	yes|down	no|down	1
gene1991	LRRC73	leucine rich repeat containing 73	yes|down	yes|down	no|down	2
gene1996	POLH	polymerase (DNA directed), eta	yes|down	yes|down	no|up	2
gene6819	DHRS12	dehydrogenase/reductase (SDR family) member 12	no|up	yes|up	no|up	1
gene20438	VCPKMT	valosin containing protein lysine (K) methyltransferase	yes|down	yes|down	no|down	2
gene6974	PDLIM3	PDZ and LIM domain 3, transcript variant X2	no|down	yes|down	yes|down	2
gene6970	FAM149A	family with sequence similarity 149, member A, transcript variant X3	no|up	yes|up	no|up	1
gene20618	CENPL	centromere protein L	yes|down	yes|down	no|up	2
gene14056	LOC106042997	uncharacterized LOC106042997, transcript variant X1	yes|down	yes|down	no|down	2
gene8107	NTRK3	neurotrophic tyrosine kinase, receptor, type 3, transcript variant X1	no|up	yes|up	no|up	1
gene14054	LOC106042992	putative P2Y purinoceptor 10	no|up	yes|down	no|down	1
gene14055	GPR174	G protein-coupled receptor 174	yes|down	yes|down	no|up	2
gene14052	LPAR4	lysophosphatidic acid receptor 4	yes|up	yes|up	no|up	2
gene14053	LOC106042993	putative P2Y purinoceptor 10	yes|down	yes|down	no|up	2
gene8100	AEN	apoptosis enhancing nuclease	no|down	yes|down	no|down	1
gene14051	LOC106042984	G-protein coupled receptor 183-B-like	no|down	yes|down	yes|down	2
gene8109	LOC106036462	uncharacterized LOC106036462, transcript variant X1	yes|up	yes|up	no|down	2
gene11669	INPP5D	inositol polyphosphate-5-phosphatase, 145kDa	yes|down	yes|down	no|down	2
gene10823	LOC106039415	uncharacterized oxidoreductase ZK1290.5-like, transcript variant X1	no|up	yes|up	yes|up	2
gene10286	SYNDIG1L	synapse differentiation inducing 1-like, transcript variant X1	no|up	yes|down	yes|down	2
gene10829	VCAM1	vascular cell adhesion molecule 1, transcript variant X1	yes|down	yes|down	no|down	2
gene11804	MLC1	megalencephalic leukoencephalopathy with subcortical cysts 1, transcript variant X1	no|up	yes|up	no|up	1
gene11805	IL17REL	interleukin 17 receptor E-like, transcript variant X1	yes|down	yes|down	no|up	2
gene9181	BCORL1	BCL6 corepressor-like 1	yes|down	yes|down	no|down	2
gene11800	TRABD	TraB domain containing, transcript variant X2	no|down	yes|down	no|down	1
gene9182	LOC106037642	tumor necrosis factor ligand superfamily member 10-like	no|up	yes|up	no|up	1
gene17620	MYO1D	myosin ID	yes|up	yes|up	no|up	2
gene17622	FMNL1	formin-like 1	yes|down	yes|down	no|down	2
gene19449	MAT2A	methionine adenosyltransferase II, alpha	yes|down	yes|down	no|down	2
gene19445	NPC1L1	NPC1-like 1	yes|down	yes|down	no|down	2
gene14581	PLCH1	phospholipase C, eta 1	yes|down	yes|down	no|up	2
gene8589	GAS2L3	growth arrest-specific 2 like 3, transcript variant X5	yes|down	yes|down	no|down	2
gene8583	LOC106036974	uncharacterized LOC106036974	no|down	yes|down	no|down	1
gene2476	LOC106030252	uncharacterized LOC106030252	no|up	yes|up	no|up	1
gene10754	LYPD1	LY6/PLAUR domain containing 1	no|down	yes|up	yes|up	2
gene10756	SLC35F5	solute carrier family 35, member F5, transcript variant X1	no|up	yes|up	no|up	1
gene10750	NCKAP5	NCK-associated protein 5, transcript variant X4	yes|up	yes|up	yes|up	3
gene9984	HAS2	hyaluronan synthase 2	no|down	yes|down	no|down	1
gene9986	SNTB1	syntrophin, beta 1 (dystrophin-associated protein A1, 59kDa, basic component 1)	no|up	yes|up	no|up	1
[truncated: 1,288 more rows]

## Sheet: 120VS300
Gene_id	Gene_name	Gene_description	D120_vs_D300	D70_vs_D300	D70_vs_D120	Sum
gene15549	LOC106044608	uncharacterized LOC106044608	yes|up	yes|up	no|up	2
gene14367	CMTM7	CKLF-like MARVEL transmembrane domain containing 7, transcript variant X1	yes|up	yes|up	no|up	2
gene14361	TRIM71	tripartite motif containing 71, E3 ubiquitin protein ligase	yes|up	no|up	no|down	1
gene14815	LOC106043810	uncharacterized LOC106043810	yes|down	yes|down	no|down	2
gene15543	PUSL1	pseudouridylate synthase-like 1, transcript variant X2	yes|down	no|down	no|up	1
gene15810	TNFSF13B	tumor necrosis factor (ligand) superfamily, member 13b	yes|down	yes|down	no|down	2
gene15547	LOC106044607	taste receptor type 1 member 3	yes|down	yes|down	no|down	2
gene15544	LOC106044634	lysophosphatidic acid receptor 6-like, transcript variant X3	yes|down	yes|down	no|down	2
gene7368	LOC106035576	granzyme A-like	yes|down	yes|down	no|down	2
gene7363	LOC106035653	chondroitin sulfate proteoglycan 4-like, transcript variant X1	yes|up	yes|up	no|up	2
gene6373	UNC80	unc-80 homolog (C. elegans)	yes|up	yes|up	no|up	2
gene19648	MVP	major vault protein, transcript variant X1	yes|down	yes|down	no|up	2
gene6376	LOC106034513	uncharacterized LOC106034513, transcript variant X2	yes|up	yes|up	no|up	2
gene19644	LOR	loricrin	yes|down	yes|down	no|up	2
gene564	LRPAP1	low density lipoprotein receptor-related protein associated protein 1	yes|up	no|up	no|down	1
gene5639	AQP9	aquaporin 9, transcript variant X1	yes|up	yes|up	no|up	2
gene14495	PTPRT	protein tyrosine phosphatase, receptor type, T, transcript variant X1	yes|up	yes|up	no|up	2
gene15149	OSTF1	osteoclast stimulating factor 1, transcript variant X1	yes|down	yes|down	no|down	2
gene10777	SCTR	secretin receptor	yes|down	no|down	no|up	1
gene20306	LOC106049813	cell adhesion molecule 3-like, transcript variant X1	yes|down	yes|down	yes|down	3
gene14638	ERICH3	glutamate-rich 3	yes|up	yes|up	yes|up	3
gene14630	NEGR1	neuronal growth regulator 1	yes|up	no|up	no|down	1
gene14141	B3GNT9	UDP-GlcNAc:betaGal beta-1,3-N-acetylglucosaminyltransferase 9, transcript variant X1	yes|up	yes|up	no|down	2
gene18876	CD5	CD5 molecule	yes|down	yes|down	no|up	2
gene18878	ZP1	zona pellucida glycoprotein 1 (sperm receptor)	yes|down	yes|down	no|down	2
gene11510	RNF186	ring finger protein 186, transcript variant X1	yes|up	yes|up	no|up	2
gene11513	LOC106040243	phospholipase A2, membrane associated-like, transcript variant X1	yes|up	yes|up	no|down	2
gene11263	TENM4	teneurin transmembrane protein 4, transcript variant X4	yes|up	yes|up	no|up	2
gene10243	LOC106038813	synaptotagmin-5-like	yes|up	yes|up	no|up	2
gene19333	LOC106048786	ras-related protein Rab-18-B-like, transcript variant X1	yes|up	yes|up	no|up	2
gene5452	GPRC5B	G protein-coupled receptor, class C, group 5, member B, transcript variant X1	yes|up	yes|up	no|up	2
gene10249	FAM177A1	family with sequence similarity 177, member A1	yes|up	yes|up	no|down	2
gene7367	LOC106035583	granzyme K-like	yes|down	yes|down	no|up	2
gene18316	LOC106047700	protein FAM188B2, transcript variant X1	yes|down	yes|down	no|up	2
gene218	LOC106030157	lysosomal acid lipase/cholesteryl ester hydrolase-like, transcript variant X1	yes|down	yes|down	no|up	2
gene8232	LOC106036526	carboxymethylenebutenolidase homolog	yes|down	yes|down	no|up	2
gene8728	GRIN1	glutamate receptor, ionotropic, N-methyl D-aspartate 1	yes|down	yes|down	no|up	2
gene8729	LRRC26	leucine rich repeat containing 26	yes|down	yes|down	no|up	2
gene4935	ARL10	ADP-ribosylation factor-like 10	yes|down	no|down	no|up	1
gene525	SLBP	stem-loop binding protein	yes|down	yes|down	no|up	2
gene1034	LOC106039530	uncharacterized LOC106039530, transcript variant X1	yes|up	no|up	no|down	1
gene5049	TRABD2B	TraB domain containing 2B	yes|up	yes|up	no|down	2
gene17732	LOC106047038	chromosome unknown open reading frame, human C15orf62, transcript variant X2	yes|down	yes|down	no|down	2
gene18062	FHOD3	formin homology 2 domain containing 3, transcript variant X1	yes|up	yes|up	no|down	2
gene10022	LOC106038521	wiskott-Aldrich syndrome protein family member 3-like	yes|up	yes|up	yes|up	3
gene17738	CASC5	cancer susceptibility candidate 5	yes|down	yes|down	no|up	2
gene19513	LOC106048983	serpin B10-like	yes|up	yes|down	yes|down	3
gene18649	PRCP	prolylcarboxypeptidase (angiotensinase C)	yes|down	yes|down	no|down	2
gene12872	MBOAT1	membrane bound O-acyltransferase domain containing 1	yes|up	no|up	no|down	1
gene13928	LOC106042805	semaphorin-3B-like	yes|up	yes|up	no|down	2
gene13298	LOC106042166	dystrophin-like, transcript variant X1	yes|up	no|up	no|down	1
gene12705	LOC106041468	uncharacterized LOC106041468	yes|down	no|down	no|up	1
gene13920	CISH	cytokine inducible SH2-containing protein	yes|down	yes|down	yes|down	3
gene13926	LOC106042814	interferon-related developmental regulator 2-like	yes|down	yes|down	no|down	2
gene5196	ENKD1	enkurin domain containing 1, transcript variant X4	yes|up	yes|up	no|up	2
gene2417	IGF2BP3	insulin-like growth factor 2 mRNA binding protein 3	yes|down	yes|down	no|down	2
gene2415	GPNMB	glycoprotein (transmembrane) nmb	yes|down	yes|down	no|up	2
gene16393	AR	androgen receptor	yes|up	yes|up	no|down	2
gene16397	HEPH	hephaestin, transcript variant X1	yes|up	yes|up	no|up	2
gene16395	LOC106045569	probable G-protein coupled receptor 83, transcript variant X1	yes|up	no|up	no|down	1
gene6564	TMEM104	transmembrane protein 104, transcript variant X1	yes|down	yes|down	no|down	2
gene18354	LIMA1	LIM domain and actin binding 1, transcript variant X1	yes|up	yes|up	no|up	2
gene12749	RGS18	regulator of G-protein signaling 18	yes|down	no|down	no|up	1
gene2096	EAF2	ELL associated factor 2	yes|down	yes|down	no|down	2
gene12747	LOC106041580	regulator of G-protein signaling 1-like	yes|down	yes|down	yes|down	3
gene4555	MAP7	microtubule-associated protein 7, transcript variant X1	yes|down	yes|down	no|down	2
gene3276	SELPLG	selectin P ligand	yes|down	yes|down	no|down	2
gene7288	ORC5	origin recognition complex, subunit 5, transcript variant X1	yes|down	no|down	no|up	1
gene4552	MTFR2	mitochondrial fission regulator 2	yes|down	no|down	no|up	1
gene7285	CHL1	cell adhesion molecule L1-like, transcript variant X1	yes|down	yes|down	no|down	2
gene16176	CREM	cAMP responsive element modulator, transcript variant X1	yes|down	yes|down	yes|down	3
gene16171	FZD8	frizzled class receptor 8	yes|down	no|up	yes|up	2
gene17954	ENDOG	endonuclease G	yes|down	yes|down	no|down	2
gene10230	GATA3	GATA binding protein 3, transcript variant X1	yes|down	yes|down	no|up	2
gene20023	SCARA5	scavenger receptor class A, member 5	yes|up	yes|up	no|down	2
gene12529	TRAF3IP3	TRAF3 interacting protein 3, transcript variant X2	yes|down	no|down	no|up	1
gene12524	LOC106041346	chromosome unknown open reading frame, human C6orf132	yes|down	yes|down	no|down	2
gene12521	LOC106041380	adenosine receptor A3-like	yes|down	yes|down	no|up	2
gene15801	EFNB2	ephrin-B2	yes|up	yes|up	no|up	2
gene15550	MXRA8	matrix-remodelling associated 8, transcript variant X2	yes|up	yes|up	no|up	2
gene12254	ARHGAP15	Rho GTPase activating protein 15, transcript variant X4	yes|down	yes|down	no|up	2
gene15751	BCL6	B-cell CLL/lymphoma 6	yes|down	yes|down	no|down	2
gene4483	TPD52L1	tumor protein D52-like 1, transcript variant X2	yes|down	no|down	no|up	1
gene6349	ABCA12	ATP-binding cassette, sub-family A (ABC1), member 12	yes|down	yes|down	no|down	2
gene6346	FN1	fibronectin 1	yes|up	no|up	yes|down	2
gene4738	LOC106032749	uncharacterized LOC106032749	yes|down	no|down	no|up	1
gene3103	LOC106030914	aldo-keto reductase family 1 member B10-like	yes|up	yes|up	no|up	2
gene429	ZCCHC24	zinc finger, CCHC domain containing 24	yes|up	no|up	no|down	1
gene19549	LRP1	low density lipoprotein receptor-related protein 1	yes|up	yes|up	no|down	2
gene16602	GSG2	germ cell associated 2 (haspin)	yes|down	yes|down	no|up	2
gene10052	TMEM164	transmembrane protein 164, transcript variant X1	yes|down	yes|down	no|down	2
gene426	ANXA11	annexin A11	yes|up	no|up	no|down	1
gene421	RET	ret proto-oncogene	yes|up	yes|up	no|down	2
gene390	OGDHL	oxoglutarate dehydrogenase-like, transcript variant X1	yes|down	yes|down	no|up	2
gene8009	DAB2	Dab, mitogen-responsive phosphoprotein, homolog 2 (Drosophila), transcript variant X1	yes|up	no|up	no|down	1
gene8006	PTGER4	prostaglandin E receptor 4 (subtype EP4)	yes|up	yes|up	no|up	2
gene14605	SGIP1	SH3-domain GRB2-like (endophilin) interacting protein 1	yes|down	yes|down	no|down	2
gene8002	C7	complement component 7, transcript variant X1	yes|down	no|down	no|up	1
gene7760	CASK	calcium/calmodulin-dependent serine protein kinase (MAGUK family), transcript variant X2	yes|up	yes|up	no|down	2
gene11073	FZD1	frizzled class receptor 1	yes|up	yes|up	no|down	2
gene11706	SKA3	spindle and kinetochore associated complex subunit 3, transcript variant X1	yes|down	yes|down	no|up	2
gene10253	NFKBIA	nuclear factor of kappa light polypeptide gene enhancer in B-cells inhibitor, alpha	yes|down	yes|down	no|down	2
gene5467	DNAH3	dynein, axonemal, heavy chain 3, transcript variant X1	yes|up	yes|up	no|up	2
gene18766	CDS1	CDP-diacylglycerol synthase (phosphatidate cytidylyltransferase) 1, transcript variant X1	yes|down	yes|down	no|down	2
gene9602	MGLL	monoglyceride lipase	yes|up	yes|up	no|up	2
gene4233	RASD1	RAS, dexamethasone-induced 1, transcript variant X1	yes|up	no|down	no|down	1
gene9357	MAP7D2	MAP7 domain containing 2, transcript variant X1	yes|down	yes|down	no|down	2
gene208	LOC106030078	CWF19-like protein 1, transcript variant X1	yes|up	yes|up	no|up	2
gene8732	NDOR1	NADPH dependent diflavin oxidoreductase 1	yes|down	no|up	yes|up	2
gene19290	MAPK15	mitogen-activated protein kinase 15, transcript variant X1	yes|up	yes|up	no|up	2
gene17389	ACAD11	acyl-CoA dehydrogenase family, member 11	yes|up	yes|up	no|up	2
gene17381	ASTE1	asteroid homolog 1 (Drosophila)	yes|down	yes|down	no|down	2
gene17387	LOC106046668	prostatic acid phosphatase-like, transcript variant X2	yes|down	yes|down	no|down	2
gene11929	NCAPD3	non-SMC condensin II complex, subunit D3	yes|down	no|down	no|up	1
gene5059	LOC106032947	cytochrome P450 4B1-like	yes|up	yes|up	no|down	2
gene5054	STIL	SCL/TAL1 interrupting locus, transcript variant X1	yes|down	no|down	no|up	1
gene11925	IGSF9B	immunoglobulin superfamily, member 9B	yes|down	yes|down	no|down	2
gene5050	LOC106033090	uncharacterized LOC106033090, transcript variant X2	yes|up	yes|up	no|down	2
gene6988	CASP3	caspase 3, apoptosis-related cysteine peptidase	yes|down	yes|down	no|up	2
gene18079	GRAMD2	GRAM domain containing 2	yes|down	yes|down	no|up	2
gene6986	CENPU	centromere protein U, transcript variant X3	yes|down	yes|down	no|up	2
gene8011	FYB	FYN binding protein, transcript variant X1	yes|down	yes|down	no|up	2
gene19078	LOC106048496	glucosylceramidase-like	yes|down	yes|down	no|up	2
gene18166	ZNF185	zinc finger protein 185 (LIM domain), transcript variant X1	yes|down	yes|down	no|down	2
gene18659	PRSS23	protease, serine, 23, transcript variant X3	yes|up	yes|up	no|down	2
gene19703	OGN	osteoglycin	yes|up	yes|up	no|down	2
gene19705	ASPN	asporin	yes|up	no|up	no|down	1
gene19704	OMD	osteomodulin	yes|up	yes|up	no|up	2
gene19706	ECM2	extracellular matrix protein 2, female organ and adipocyte specific	yes|up	yes|up	no|up	2
gene13288	LOC106042157	cytochrome b-245 heavy chain	yes|down	yes|down	no|up	2
gene13287	LOC106042158	uncharacterized LOC106042158	yes|down	yes|down	no|up	2
gene1190	LOC106041315	translocating chain-associated membrane protein 1-like 1, transcript variant X1	yes|down	no|down	no|up	1
gene13281	TSPAN7	tetraspanin 7, transcript variant X2	yes|up	yes|up	no|up	2
gene4909	NIPAL4	NIPA-like domain containing 4, transcript variant X2	yes|down	yes|down	no|down	2
gene5185	LOC106033294	C-C motif chemokine 3-like	yes|down	yes|down	no|down	2
gene9174	ERCC6L	excision repair cross-complementation group 6-like	yes|down	yes|down	no|up	2
gene4907	CYFIP2	cytoplasmic FMR1 interacting protein 2, transcript variant X2	yes|down	yes|down	no|up	2
gene9177	SASH3	SAM and SH3 domain containing 3, transcript variant X1	yes|down	yes|down	no|up	2
gene16388	LOC106045529	merlin-like	yes|up	no|up	no|down	1
gene16381	DTX1	deltex 1, E3 ubiquitin ligase	yes|down	yes|down	no|up	2
gene5984	PRG4	proteoglycan 4	yes|up	no|down	no|down	1
gene2087	GLI2	GLI family zinc finger 2	yes|up	yes|up	no|down	2
gene2082	LOC106029876	leucine-zipper-like transcriptional regulator 1, transcript variant X1	yes|up	yes|up	no|down	2
gene12730	LOC106041557	complement factor H-related protein 2-like, transcript variant X1	yes|up	no|up	no|down	1
gene12732	CFH	complement factor H	yes|up	yes|up	no|down	2
gene2668	LOC106030437	glutathione S-transferase-like	yes|up	yes|up	no|up	2
gene15705	LOC106044797	cytochrome P450 2J6-like	yes|down	yes|down	no|up	2
gene7292	RELN	reelin	yes|up	yes|up	no|down	2
gene17969	DNM1	dynamin 1	yes|up	yes|up	no|up	2
gene19854	UGGT2	UDP-glucose glycoprotein glucosyltransferase 2	yes|up	yes|up	no|up	2
gene17963	GLE1	GLE1 RNA export mediator	yes|down	yes|down	no|down	2
gene17476	LOC106046794	uncharacterized LOC106046794	yes|down	yes|down	no|down	2
gene17964	ODF2	outer dense fiber of sperm tails 2, transcript variant X1	yes|down	yes|down	no|up	2
gene12086	LOC106040774	DEP domain-containing mTOR-interacting protein-like	yes|down	yes|down	no|up	2
gene19962	LOC106049451	CD209 antigen-like protein C	yes|down	no|down	no|up	1
gene15833	ATP8B1	ATPase, aminophospholipid transporter, class I, type 8B, member 1, transcript variant X3	yes|down	yes|down	no|down	2
gene7346	ITGA2	integrin, alpha 2 (CD49B, alpha 2 subunit of VLA-2 receptor)	yes|down	yes|down	no|down	2
gene12638	LOC106041491	C-C motif chemokine 3-like	yes|down	yes|down	no|up	2
gene6352	BARD1	BRCA1 associated RING domain 1	yes|down	no|down	no|up	1
gene1404	CHST1	carbohydrate (keratan sulfate Gal-6) sulfotransferase 1	yes|down	yes|down	yes|down	3
gene5618	CCPG1	cell cycle progression 1, transcript variant X3	yes|up	yes|up	no|down	2
gene1822	CNTN1	contactin 1, transcript variant X1	yes|up	no|up	no|down	1
gene15129	LOC106044089	uncharacterized LOC106044089	yes|up	no|up	no|up	1
gene6723	NDC80	NDC80 kinetochore complex component, transcript variant X1	yes|down	yes|down	no|up	2
gene14612	IL12RB2	interleukin 12 receptor, beta 2	yes|down	yes|down	no|down	2
gene8039	C1QTNF3	C1q and tumor necrosis factor related protein 3, transcript variant X1	yes|up	yes|up	no|up	2
gene18816	LOC106048210	tyrosine-protein kinase JAK3-like	yes|down	yes|down	no|up	2
gene20184	GSDMA	gasdermin A	yes|up	yes|up	no|up	2
gene20183	ORMDL3	ORMDL sphingolipid biosynthesis regulator 3	yes|up	yes|up	no|up	2
gene20180	IKZF3	IKAROS family zinc finger 3 (Aiolos), transcript variant X1	yes|down	yes|down	no|up	2
gene11064	STEAP1	six transmembrane epithelial antigen of the prostate 1, transcript variant X2	yes|up	yes|up	no|up	2
gene11065	STEAP2	STEAP family member 2, metalloreductase, transcript variant X1	yes|up	yes|up	no|up	2
gene18818	FANCB	Fanconi anemia, complementation group B	yes|down	yes|down	no|down	2
gene11711	N6AMT2	N-6 adenine-specific DNA methyltransferase 2 (putative), transcript variant X1	yes|down	yes|down	no|down	2
gene11716	LOC106040406	gap junction beta-6 protein	yes|down	yes|down	no|down	2
gene11717	LOC106040409	gap junction beta-6 protein-like	yes|down	yes|down	no|down	2
gene13041	LOC106041941	uncharacterized LOC106041941	yes|down	no|down	no|up	1
gene1971	LOC106029463	cytochrome P450 1B1	yes|down	no|down	yes|up	2
gene5470	CRYM	crystallin, mu, transcript variant X1	yes|up	yes|up	no|up	2
gene11395	LOC106040019	uncharacterized LOC106040019	yes|down	no|down	no|up	1
gene20058	S1PR4	sphingosine-1-phosphate receptor 4	yes|down	yes|down	no|down	2
gene13310	TOP1MT	topoisomerase (DNA) I, mitochondrial, transcript variant X2	yes|down	yes|down	no|up	2
gene2571	LOC106030345	macrophage mannose receptor 1-like, transcript variant X1	yes|up	yes|up	no|down	2
gene2573	LOC106030347	macrophage mannose receptor 1-like	yes|up	yes|up	no|up	2
gene3346	LOC106031151	uncharacterized LOC106031151, transcript variant X1	yes|down	no|down	no|up	1
gene8744	TRAF2	TNF receptor-associated factor 2, transcript variant X1	yes|down	yes|down	no|up	2
gene3909	MBNL2	muscleblind-like splicing regulator 2, transcript variant X1	yes|up	yes|up	no|down	2
gene19283	RAMP3	receptor (G protein-coupled) activity modifying protein 3, transcript variant X1	yes|up	yes|up	no|up	2
gene8965	NOX1	NADPH oxidase 1	yes|down	yes|down	no|up	2
gene8966	XKRX	XK, Kell blood group complex subunit-related, X-linked	yes|down	no|down	no|up	1
gene8961	SRPX2	sushi-repeat containing protein, X-linked 2	yes|up	yes|up	no|up	2
gene17395	SMARCA5	SWI/SNF related, matrix associated, actin dependent regulator of chromatin, subfamily a, member 5, transcript variant X1	yes|down	yes|down	no|down	2
gene17390	ACKR4	atypical chemokine receptor 4	yes|up	yes|up	no|up	2
gene5066	DMBX1	diencephalon/mesencephalon homeobox 1	yes|up	yes|up	no|down	2
gene5067	LOC106032948	fatty-acid amide hydrolase 1-like	yes|up	no|up	no|down	1
gene6998	LOC106035143	uncharacterized LOC106035143	yes|down	yes|down	no|down	2
gene17712	LOC106047031	interferon-induced transmembrane protein 3-like	yes|down	yes|down	no|down	2
gene17713	B4GALNT4	beta-1,4-N-acetyl-galactosaminyl transferase 4	yes|down	yes|down	no|down	2
gene17714	PKP3	plakophilin 3, transcript variant X1	yes|down	yes|down	no|down	2
gene18003	TCERG1L	transcription elongation regulator 1-like	yes|down	yes|down	no|up	2
gene17717	ANO9	anoctamin 9, transcript variant X1	yes|down	yes|down	no|up	2
gene18627	PTRF	polymerase I and transcript release factor	yes|up	yes|up	no|up	2
gene17575	LYPD6B	LY6/PLAUR domain containing 6B, transcript variant X1	yes|up	yes|up	no|up	2
gene18623	LOC106047990	inactive phospholipase C-like protein 2	yes|down	yes|down	no|up	2
gene18629	LOC106047992	serine/threonine-protein kinase 17A-like	yes|down	no|down	no|up	1
gene495	LOC106033972	uncharacterized LOC106033972	yes|down	no|down	no|up	1
gene497	CD8A	CD8a molecule	yes|down	yes|down	no|up	2
gene946	LOC106038496	uncharacterized LOC106038496	yes|up	no|up	no|down	1
gene945	FILIP1L	filamin A interacting protein 1-like, transcript variant X1	yes|up	no|down	yes|down	2
gene1185	SLC2A10	solute carrier family 2 (facilitated glucose transporter), member 10, transcript variant X1	yes|up	yes|up	no|up	2
gene1187	EYA2	EYA transcriptional coactivator and phosphatase 2, transcript variant X1	yes|up	yes|up	no|up	2
gene540	HAUS3	HAUS augmin-like complex, subunit 3	yes|down	yes|down	no|down	2
gene4919	EBF1	early B-cell factor 1, transcript variant X1	yes|up	yes|up	no|down	2
gene9163	LOC106037566	desmoglein-4-like	yes|down	yes|down	no|down	2
gene9162	LOC106037565	desmocollin-2-like	yes|down	yes|down	no|down	2
gene4911	SOX30	SRY (sex determining region Y)-box 30	yes|down	yes|down	no|up	2
gene4910	ADAM19	ADAM metallopeptidase domain 19	yes|down	yes|down	no|down	2
gene9164	DSG2	desmoglein 2, transcript variant X1	yes|down	yes|down	no|down	2
gene2478	GALNT15	polypeptide N-acetylgalactosaminyltransferase 15, transcript variant X2	yes|up	no|up	no|down	1
gene2479	LOC106030255	uncharacterized LOC106030255	yes|up	no|up	no|down	1
gene18743	FKBP4	FK506 binding protein 4, 59kDa	yes|down	yes|down	no|down	2
gene12896	JARID2	jumonji, AT rich interactive domain 2, transcript variant X1	yes|up	yes|up	no|down	2
gene12725	NTS	neurotensin	yes|down	yes|down	no|down	2
gene12890	CD83	CD83 molecule	yes|down	yes|down	yes|down	3
gene12723	ALX1	ALX homeobox 1	yes|up	yes|up	no|up	2
gene16111	RAB11FIP2	RAB11 family interacting protein 2 (class I)	yes|up	yes|up	no|down	2
gene19844	LOC106049328	alveolar macrophage chemotactic factor-like	yes|down	no|down	no|down	1
gene19845	LOC106049327	growth-regulated alpha protein-like	yes|down	no|down	no|up	1
gene13415	CLHC1	clathrin heavy chain linker domain containing 1	yes|down	no|down	no|up	1
gene13414	RTN4	reticulon 4, transcript variant X1	yes|up	yes|up	no|up	2
gene13411	SPTBN1	spectrin, beta, non-erythrocytic 1, transcript variant X1	yes|up	yes|up	no|up	2
gene12094	SLC17A9	solute carrier family 17 (vesicular nucleotide transporter), member 9	yes|down	no|down	no|up	1
gene19197	ELL3	elongation factor RNA polymerase II-like 3, transcript variant X1	yes|down	no|down	no|up	1
gene6881	LACC1	laccase (multicopper oxidoreductase) domain containing 1, transcript variant X3	yes|down	no|down	no|up	1
gene12273	VPS37D	vacuolar protein sorting 37 homolog D (S. cerevisiae)	yes|down	yes|down	no|up	2
gene7336	KIAA1324L	KIAA1324-like ortholog, transcript variant X3	yes|up	no|up	no|down	1
gene9713	PLA2G7	phospholipase A2, group VII (platelet-activating factor acetylhydrolase, plasma)	yes|down	yes|down	no|up	2
gene6887	TNFSF11	tumor necrosis factor (ligand) superfamily, member 11	yes|down	no|down	no|up	1
gene6322	IQCA1	IQ motif containing with AAA domain 1, transcript variant X1	yes|up	yes|up	no|up	2
gene9717	LOC106038159	meprin A subunit alpha-like, transcript variant X2	yes|up	no|up	no|down	1
gene1417	DGKZ	diacylglycerol kinase, zeta	yes|down	yes|down	no|up	2
gene5667	MTMR10	myotubularin related protein 10	yes|up	no|up	no|down	1
gene3127	LOC106030932	mRNA-decapping enzyme 1B-like	yes|up	yes|up	no|up	2
gene14449	MRPS6	mitochondrial ribosomal protein S6, transcript variant X1	yes|down	yes|down	no|up	2
gene14995	SLITRK6	SLIT and NTRK-like family, member 6, transcript variant X1	yes|down	yes|down	no|down	2
gene20338	LOC106049849	complement C4-A-like	yes|down	yes|down	no|up	2
gene465	PLAU	plasminogen activator, urokinase	yes|down	yes|down	no|down	2
gene8025	LOC106036387	S-phase kinase-associated protein 2-like	yes|down	no|down	no|up	1
gene20199	LOC106049710	uncharacterized LOC106049710, transcript variant X1	yes|up	yes|up	no|up	2
gene14666	LOC106043628	uncharacterized LOC106043628	yes|down	yes|down	no|down	2
gene3012	OCIAD2	OCIA domain containing 2, transcript variant X4	yes|down	no|down	no|up	1
gene14191	LOC106043089	uncharacterized LOC106043089, transcript variant X2	yes|down	yes|down	no|down	2
gene14662	KIF23	kinesin family member 23	yes|down	yes|down	no|down	2
gene14669	CORO2B	coronin, actin binding protein, 2B	yes|up	no|up	no|down	1
gene11017	ZNF536	zinc finger protein 536	yes|up	no|up	no|down	1
gene11235	CCDC84	coiled-coil domain containing 84, transcript variant X1	yes|down	no|down	no|up	1
gene11726	ARHGAP20	Rho GTPase activating protein 20	yes|down	no|down	no|up	1
gene11237	FOXR1	forkhead box R1	yes|down	yes|down	no|down	2
gene11383	CLK1	CDC-like kinase 1, transcript variant X1	yes|down	yes|down	no|up	2
gene11723	PARP4	poly (ADP-ribose) polymerase family, member 4	yes|down	no|down	no|up	1
gene11238	CXCR5	chemokine (C-X-C motif) receptor 5	yes|down	no|down	no|up	1
gene14268	LOC106043207	uncharacterized LOC106043207	yes|down	yes|down	no|up	2
gene5407	SHISA9	shisa family member 9	yes|up	no|up	no|down	1
gene5402	IL20RB	interleukin 20 receptor beta	yes|down	yes|down	no|up	2
gene17421	NTN1	netrin 1	yes|up	no|up	no|down	1
gene14264	LOC106043196	zinc finger CCCH domain-containing protein 40-like	yes|down	yes|down	no|down	2
gene14267	LOC106043193	dedicator of cytokinesis protein 2-like	yes|down	yes|down	no|down	2
gene20518	LOC106029373	protein-glutamine gamma-glutamyltransferase K-like	yes|down	yes|down	no|down	2
gene20043	LOC106049538	HEPACAM family member 2-like	yes|down	yes|down	yes|down	3
gene8681	TNFSF8	tumor necrosis factor (ligand) superfamily, member 8	yes|down	yes|down	no|down	2
gene8689	LOC106037040	niban-like protein 1	yes|up	no|up	no|down	1
gene6695	ANKH	ANKH inorganic pyrophosphate transport regulator	yes|up	no|up	no|down	1
gene12647	LOC106041399	splicing factor 3B subunit 4-like	yes|down	no|down	no|up	1
gene17870	LOC106047195	myosin heavy chain, skeletal muscle, adult-like	yes|up	yes|up	no|up	2
gene9377	ACOT9	acyl-CoA thioesterase 9	yes|up	yes|up	no|up	2
gene9375	PTCHD1	patched domain containing 1	yes|up	yes|up	no|down	2
gene8205	IKZF1	IKAROS family zinc finger 1 (Ikaros), transcript variant X3	yes|down	yes|down	no|up	2
gene8754	FUT7	fucosyltransferase 7 (alpha (1,3) fucosyltransferase), transcript variant X1	yes|down	yes|down	no|down	2
gene8200	GRB10	growth factor receptor-bound protein 10	yes|up	no|up	no|down	1
gene9378	SAT1	spermidine/spermine N1-acetyltransferase 1	yes|down	yes|down	no|down	2
gene19271	LOC106048725	T-cell receptor beta-2 chain C region-like	yes|down	yes|down	no|up	2
gene19270	LOC106048724	T-cell receptor beta-1 chain C region-like	yes|down	yes|down	no|up	2
gene10632	NRROS	negative regulator of reactive oxygen species, transcript variant X2	yes|down	yes|down	no|up	2
gene19498	LOC106048962	ras GTPase-activating-like protein IQGAP3	yes|down	yes|down	no|down	2
gene8973	FGF13	fibroblast growth factor 13, transcript variant X1	yes|up	yes|up	no|down	2
gene17364	FAM198A	family with sequence similarity 198, member A	yes|up	yes|up	no|up	2
gene17369	LOC106046649	uncharacterized LOC106046649, transcript variant X2	yes|down	no|down	no|up	1
gene19492	SEMA4A	sema domain, immunoglobulin domain (Ig), transmembrane domain (TM) and short cytoplasmic domain, (semaphorin) 4A	yes|down	no|down	no|up	1
gene20665	LOC106029527	Ig heavy chain Mem5-like	yes|down	no|down	no|down	1
gene11904	LOC106040547	transmembrane protein 45B-like	yes|down	yes|down	no|down	2
gene17768	LOC106047050	NACHT, LRR and PYD domains-containing protein 3-like, transcript variant X1	yes|up	yes|up	no|up	2
gene18016	ADGRL3	adhesion G protein-coupled receptor L3, transcript variant X1	yes|up	yes|up	no|up	2
gene18014	FANCC	Fanconi anemia, complementation group C, transcript variant X1	yes|down	no|down	no|up	1
gene17763	EPS8L2	EPS8-like 2	yes|up	yes|up	no|up	2
gene19016	ETV7	ets variant 7, transcript variant X2	yes|down	yes|down	no|down	2
gene19019	SRSF3	serine/arginine-rich splicing factor 3	yes|down	no|down	no|up	1
gene18636	CNTNAP1	contactin associated protein 1	yes|up	yes|up	no|down	2
gene17507	LOC106046816	GTPase IMAP family member 4-like	yes|down	yes|down	no|up	2
gene17506	LOC106046813	GTPase IMAP family member 1-like	yes|down	yes|down	no|up	2
gene19723	LOC106049228	SLAM family member 5-like, transcript variant X1	yes|down	yes|down	no|up	2
gene19722	LOC106049209	signaling lymphocytic activation molecule-like	yes|down	no|down	no|up	1
gene19721	LOC106049230	SLAM family member 8-like	yes|down	yes|down	no|up	2
gene19720	LOC106049205	natural killer cell receptor 2B4-like	yes|down	no|down	no|up	1
gene959	LOC106038723	putative protein FAM172B, transcript variant X1	yes|up	no|up	no|down	1
gene954	ABI3BP	ABI family, member 3 (NESH) binding protein, transcript variant X1	yes|up	no|up	no|down	1
gene9889	LOC106038418	ras-related protein Rab-10-like	yes|down	no|down	no|up	1
gene9401	RSRP1	arginine/serine-rich protein 1, transcript variant X1	yes|down	yes|down	no|up	2
gene9404	RUNX3	runt-related transcription factor 3	yes|down	yes|down	no|up	2
gene556	GRK4	G protein-coupled receptor kinase 4, transcript variant X1	yes|down	yes|down	no|up	2
gene557	LOC106034660	uncharacterized LOC106034660	yes|down	yes|down	no|down	2
gene9408	NCMAP	noncompact myelin associated protein, transcript variant X1	yes|down	yes|down	no|up	2
gene125	STAMBPL1	STAM binding protein-like 1, transcript variant X4	yes|down	no|down	no|up	1
gene2468	WIPF3	WAS/WASL interacting protein family, member 3, transcript variant X2	yes|up	yes|up	no|up	2
gene2464	CREB5	cAMP responsive element binding protein 5, transcript variant X1	yes|up	no|up	no|down	1
gene16361	LOC106045509	uncharacterized LOC106045509	yes|down	yes|down	no|up	2
gene6519	HLF	hepatic leukemia factor	yes|up	yes|up	no|down	2
gene16365	MED13L	mediator complex subunit 13-like	yes|up	no|up	no|down	1
gene17183	TFDP1	transcription factor Dp-1, transcript variant X1	yes|down	no|down	no|up	1
gene7829	DSCAM	Down syndrome cell adhesion molecule	yes|down	no|down	no|up	1
gene12861	CREG2	cellular repressor of E1A-stimulated genes 2	yes|up	yes|up	yes|up	3
gene12714	TMTC2	transmembrane and tetratricopeptide repeat containing 2	yes|up	no|up	no|down	1
gene13622	ANGPTL1	angiopoietin-like 1	yes|up	yes|up	no|down	2
gene12718	SLC6A15	solute carrier family 6 (neutral amino acid transporter), member 15	yes|down	yes|down	no|up	2
gene14439	LOC106043423	uncharacterized LOC106043423	yes|down	no|down	no|up	1
gene9299	CENPI	centromere protein I, transcript variant X2	yes|down	yes|down	no|up	2
gene19873	LOC106049353	collagen alpha-2(XI) chain-like	yes|up	yes|up	no|down	2
gene19871	LOC106049351	DNA-directed RNA polymerase II subunit RPB1-like	yes|up	yes|up	no|down	2
gene8830	ZBTB25	zinc finger and BTB domain containing 25, transcript variant X1	yes|down	yes|down	no|up	2
gene7825	LOC106036132	interferon-induced GTP-binding protein Mx, transcript variant X1	yes|down	yes|down	no|down	2
gene1791	SLC38A4	solute carrier family 38, member 4, transcript variant X2	yes|up	yes|up	no|up	2
gene7827	BACE2	beta-site APP-cleaving enzyme 2	yes|up	no|up	no|down	1
gene3731	CENPF	centromere protein F, 350/400kDa	yes|down	yes|down	no|down	2
gene15586	MMEL1	membrane metallo-endopeptidase-like 1, transcript variant X2	yes|up	yes|up	no|up	2
gene12282	LOC106041056	uncharacterized LOC106041056	yes|up	yes|up	no|down	2
gene15852	LOC106045009	ectoderm-neural cortex protein 1-like	yes|down	yes|down	yes|down	3
gene15858	CPAMD8	C3 and PZP-like, alpha-2-macroglobulin domain containing 8	yes|up	no|up	no|down	1
gene10701	BDH1	3-hydroxybutyrate dehydrogenase, type 1	yes|down	yes|down	no|up	2
gene3332	RHOF	ras homolog family member F (in filopodia)	yes|down	yes|down	no|up	2
gene3488	LOC106031282	vacuolar protein sorting-associated protein 29-like	yes|down	no|down	no|up	1
gene3489	VPREB3	pre-B lymphocyte 3	yes|down	no|down	no|up	1
gene3486	LOC106031280	carbonic anhydrase 15-like, transcript variant X2	yes|down	no|down	no|up	1
gene3487	LOC106031283	Ig lambda chain V-I region BL2-like isoform X50	yes|down	no|down	no|down	1
gene3485	LOC106031279	uncharacterized LOC106031279	yes|down	yes|down	no|down	2
gene7326	SEMA3E	sema domain, immunoglobulin domain (Ig), short basic domain, secreted, (semaphorin) 3E, transcript variant X1	yes|up	yes|up	no|up	2
gene7323	PCLO	piccolo presynaptic cytomatrix protein	yes|up	yes|up	no|up	2
gene7322	CACNA2D1	calcium channel, voltage-dependent, alpha 2/delta subunit 1, transcript variant X1	yes|up	no|up	no|down	1
gene7321	HGF	hepatocyte growth factor (hepapoietin A; scatter factor), transcript variant X1	yes|up	yes|up	yes|down	3
gene16586	LOC106045763	fatty aldehyde dehydrogenase-like	yes|up	yes|up	no|up	2
gene16587	LOC106045817	fatty aldehyde dehydrogenase-like, transcript variant X1	yes|up	yes|up	no|up	2
gene7329	SEMA3D	sema domain, immunoglobulin domain (Ig), short basic domain, secreted, (semaphorin) 3D, transcript variant X2	yes|up	yes|up	no|down	2
gene6335	LOC106034499	uncharacterized LOC106034499	yes|down	yes|down	yes|down	3
gene3228	SPIC	Spi-C transcription factor (Spi-1/PU.1 related), transcript variant X3	yes|down	yes|down	no|down	2
gene6331	COL6A3	collagen, type VI, alpha 3, transcript variant X1	yes|up	no|up	no|down	1
gene5678	GTF2A2	general transcription factor IIA, 2, 12kDa	yes|down	yes|down	no|up	2
gene5673	OTUD7A	OTU deubiquitinase 7A, transcript variant X1	yes|down	yes|down	no|down	2
gene14982	CENPC	centromere protein C	yes|down	yes|down	no|down	2
gene15108	SLC2A6	solute carrier family 2 (facilitated glucose transporter), member 6	yes|down	yes|down	no|down	2
gene3159	FAM60A	family with sequence similarity 60, member A, transcript variant X2	yes|down	yes|down	no|down	2
gene16635	OPTC	opticin, transcript variant X1	yes|up	yes|up	no|up	2
gene14856	IRF4	interferon regulatory factor 4	yes|down	yes|down	no|up	2
gene14180	LOC106043079	calpain small subunit 1-like	yes|down	yes|down	no|up	2
gene14183	MMP2	matrix metallopeptidase 2	yes|up	yes|up	no|down	2
gene14185	LOC106043083	uncharacterized LOC106043083, transcript variant X3	yes|up	yes|up	no|up	2
gene18839	NUP160	nucleoporin 160kDa	yes|down	yes|down	no|down	2
gene14670	ITGA11	integrin, alpha 11	yes|up	yes|up	no|down	2
gene11000	SHCBP1	SHC SH2-domain binding protein 1	yes|down	yes|down	no|up	2
gene18248	OSTN	osteocrin, transcript variant X1	yes|up	no|up	no|up	1
gene14279	MAB21L1	mab-21-like 1 (C. elegans)	yes|up	yes|up	no|up	2
gene7486	LOC106035751	interleukin-5 receptor subunit alpha-like, transcript variant X1	yes|down	yes|down	no|down	2
gene7487	LOC106035752	granulocyte-macrophage colony-stimulating factor receptor subunit alpha-like, transcript variant X1	yes|down	yes|down	no|up	2
gene14274	DOK1	docking protein 1, 62kDa (downstream of tyrosine kinase 1)	yes|down	yes|down	no|down	2
gene20078	TOP2A	topoisomerase (DNA) II alpha 170kDa	yes|down	yes|down	no|up	2
gene20076	IGFBP4	insulin-like growth factor binding protein 4	yes|up	yes|up	no|up	2
gene20074	CCR7	chemokine (C-C motif) receptor 7	yes|down	yes|down	no|down	2
gene20071	KRT222	keratin 222, type II, transcript variant X1	yes|down	yes|down	no|down	2
gene1883	EDARADD	EDAR-associated death domain	yes|down	yes|down	no|down	2
gene20701	LOC106029566	alcohol dehydrogenase 1, transcript variant X1	yes|up	no|up	no|down	1
gene20702	LOC106029567	uncharacterized LOC106029567, transcript variant X1	yes|up	yes|up	no|down	2
gene6683	F13A1	coagulation factor XIII, A1 polypeptide, transcript variant X2	yes|up	yes|up	no|down	2
gene3921	GPR18	G protein-coupled receptor 18	yes|down	yes|down	no|up	2
gene3923	LOC106031807	G-protein coupled receptor 183-like, transcript variant X1	yes|down	yes|down	no|up	2
gene8764	LOC106037110	dual specificity testis-specific protein kinase 2-like, transcript variant X1	yes|up	yes|up	yes|up	3
gene19262	BIN2	bridging integrator 2	yes|down	yes|down	no|up	2
gene19260	GALNT6	polypeptide N-acetylgalactosaminyltransferase 6	yes|down	yes|down	no|up	2
gene16955	LOC106046186	tyrosine-protein phosphatase non-receptor type 7-like	yes|down	yes|down	no|up	2
gene17371	MTURN	maturin, neural progenitor differentiation regulator homolog (Xenopus)	yes|up	yes|up	no|up	2
gene17377	COL6A6	collagen, type VI, alpha 6, transcript variant X2	yes|down	yes|down	yes|down	3
gene11912	ADAMTS8	ADAM metallopeptidase with thrombospondin type 1 motif, 8	yes|up	no|up	no|down	1
gene478	ANXA7	annexin A7, transcript variant X1	yes|up	no|up	no|down	1
gene9091	DLX5	distal-less homeobox 5	yes|down	yes|down	no|up	2
gene1229	ATP9A	ATPase, class II, type 9A	yes|up	yes|up	no|down	2
gene17133	ERMP1	endoplasmic reticulum metallopeptidase 1	yes|down	no|down	no|up	1
gene5338	METRN	meteorin, glial cell differentiation regulator	yes|down	no|down	no|up	1
gene17779	ZNF750	zinc finger protein 750	yes|down	yes|down	no|up	2
gene1222	KCNG1	potassium channel, voltage gated modifier subfamily G, member 1, transcript variant X2	yes|up	yes|up	no|up	2
gene13103	NTNG1	netrin G1, transcript variant X7	yes|up	no|up	no|down	1
gene19736	LOC106049223	scale keratin-like	yes|down	yes|down	no|up	2
gene15973	CCDC37	coiled-coil domain containing 37, transcript variant X1	yes|down	yes|down	no|up	2
gene20855	ND1	NADH dehydrogenase subunit 1	yes|up	yes|up	no|down	2
gene15976	KLF15	Kruppel-like factor 15, transcript variant X1	yes|up	no|up	no|down	1
gene966	NXPE3	neurexophilin and PC-esterase domain family, member 3, transcript variant X1	yes|down	yes|down	no|up	2
gene18285	NCAPH	non-SMC condensin I complex, subunit H	yes|down	yes|down	no|up	2
gene1165	WISP2	WNT1 inducible signaling pathway protein 2	yes|up	yes|up	no|up	2
gene1164	LOC106041081	P2Y purinoceptor 1-like	yes|down	yes|down	no|down	2
gene1169	TTPAL	tocopherol (alpha) transfer protein-like, transcript variant X1	yes|down	yes|down	no|down	2
gene9413	GRHL3	grainyhead-like 3 (Drosophila), transcript variant X2	yes|down	yes|down	no|down	2
gene9144	ZNF521	zinc finger protein 521, transcript variant X1	yes|up	no|up	no|down	1
gene9415	IL22RA1	interleukin 22 receptor, alpha 1	yes|down	yes|down	no|down	2
gene9414	IFNLR1	interferon, lambda receptor 1	yes|down	yes|down	no|up	2
gene8943	PCDH11X	protocadherin 11 X-linked	yes|up	yes|up	no|up	2
gene9419	PNRC2	proline-rich nuclear receptor coactivator 2	yes|down	yes|down	no|down	2
gene563	DOK7	docking protein 7, transcript variant X4	yes|up	yes|up	no|up	2
gene7130	SNAP91	synaptosomal-associated protein, 91kDa, transcript variant X2	yes|down	no|down	no|up	1
gene2324	GPR1	G protein-coupled receptor 1, transcript variant X2	yes|up	yes|up	no|down	2
gene2327	ADAM23	ADAM metallopeptidase domain 23	yes|up	yes|up	no|down	2
gene6522	STXBP4	syntaxin binding protein 4, transcript variant X1	yes|up	yes|up	no|up	2
gene16356	ITGA9	integrin, alpha 9, transcript variant X1	yes|up	no|up	no|down	1
gene16353	NEUROD6	neuronal differentiation 6, transcript variant X1	yes|down	no|down	no|up	1
gene17192	LOC106046449	uncharacterized LOC106046449, transcript variant X3	yes|up	yes|up	no|up	2
gene18359	LOC106047730	methyltransferase-like protein 7A	yes|up	yes|up	no|up	2
gene12706	LOC106041503	linker for activation of T-cells family member 2-like	yes|down	yes|down	no|up	2
gene12700	LOC106041486	protein spinster homolog 3-like, transcript variant X2	yes|down	yes|down	no|down	2
gene13658	ARHGAP6	Rho GTPase activating protein 6, transcript variant X1	yes|up	no|up	no|down	1
gene12702	LOC106041472	protein spinster homolog 2	yes|up	yes|up	no|up	2
gene16828	KDM8	lysine (K)-specific demethylase 8	yes|down	no|down	no|up	1
gene13873	RGS14	regulator of G-protein signaling 14	yes|down	yes|down	no|down	2
gene18600	LOC106047979	keratin, type I cytoskeletal 14-like	yes|down	yes|down	no|down	2
gene12709	LOC106041524	uncharacterized LOC106041524	yes|up	yes|up	no|up	2
gene15113	SARDH	sarcosine dehydrogenase	yes|up	no|up	no|down	1
gene13477	LOC106042406	disintegrin and metalloproteinase domain-containing protein 9-like, transcript variant X1	yes|down	no|down	no|up	1
gene17344	ZFHX3	zinc finger homeobox 3	yes|up	no|up	no|down	1
gene13478	LOC106042364	olfactory receptor 2AT4	yes|down	no|down	no|up	1
gene12292	LOC106041040	C-C motif chemokine 5-like	yes|down	yes|down	no|up	2
gene12290	LOC106041041	C-C motif chemokine 4 homolog	yes|down	yes|down	yes|down	3
gene12296	LOC106041043	1-acyl-sn-glycerol-3-phosphate acyltransferase alpha-like	yes|down	yes|down	no|down	2
gene3490	LOC106031281	uncharacterized LOC106031281, transcript variant X2	yes|down	no|down	no|up	1
gene3320	B3GNT4	UDP-GlcNAc:betaGal beta-1,3-N-acetylglucosaminyltransferase 4	yes|down	yes|down	no|down	2
gene7312	MAGI2	membrane associated guanylate kinase, WW and PDZ domain containing 2	yes|up	yes|up	no|up	2
gene6562	LOC106034617	Na(+)/H(+) exchange regulatory cofactor NHE-RF1-like	yes|down	yes|down	no|up	2
gene6301	USP40	ubiquitin specific peptidase 40, transcript variant X2	yes|down	yes|down	no|up	2
gene1430	PACSIN3	protein kinase C and casein kinase substrate in neurons 3	yes|up	no|up	no|down	1
gene1439	SPI1	Spi-1 proto-oncogene	yes|down	yes|down	no|down	2
gene5647	CCNB2	cyclin B2	yes|down	yes|down	no|up	2
gene5649	FAM81A	family with sequence similarity 81, member A, transcript variant X2	yes|up	yes|up	no|up	2
gene3145	SLC6A12	solute carrier family 6 (neurotransmitter transporter), member 12	yes|down	yes|down	no|down	2
gene3142	CCDC77	coiled-coil domain containing 77, transcript variant X1	yes|down	no|down	no|up	1
gene14460	LOC106043431	trifunctional purine biosynthetic protein adenosine-3-like, transcript variant X1	yes|down	no|down	yes|up	2
gene15442	ANXA1	annexin A1	yes|up	no|up	yes|down	2
gene15444	LOC106044503	uncharacterized LOC106044503, transcript variant X1	yes|up	no|up	no|down	1
gene15445	LOC106044490	kelch-like protein 29	yes|up	no|up	no|down	1
gene16645	CCND3	cyclin D3	yes|down	yes|down	no|up	2
gene16647	MED20	mediator complex subunit 20	yes|down	no|down	no|up	1
gene15592	PRDM16	PR domain containing 16, transcript variant X1	yes|up	yes|up	no|up	2
gene12669	ORAI2	ORAI calcium release-activated calcium modulator 2, transcript variant X2	yes|down	no|down	no|up	1
gene1239	TSHZ2	teashirt zinc finger homeobox 2, transcript variant X1	yes|up	yes|up	no|down	2
gene20280	LOC106049788	feather keratin Cos1-1/Cos1-3/Cos2-1-like	yes|down	no|down	no|up	1
gene3275	CORO1C	coronin, actin binding protein, 1C	yes|down	yes|down	no|up	2
gene12787	TNFSF4	tumor necrosis factor (ligand) superfamily, member 4	yes|down	no|down	no|up	1
gene5420	MPV17L	MPV17 mitochondrial membrane protein-like	yes|down	yes|down	no|up	2
gene7499	CD99	CD99 molecule, transcript variant X1	yes|up	no|up	no|down	1
gene14249	LOC106043214	uncharacterized LOC106043214	yes|down	yes|down	no|down	2
gene14247	ATP6V1B1	ATPase, H+ transporting, lysosomal 56/58kDa, V1 subunit B1	yes|down	yes|down	no|up	2
gene7491	P2RY8	purinergic receptor P2Y, G-protein coupled, 8, transcript variant X3	yes|down	yes|down	no|up	2
gene7874	LOC106036167	zinc finger protein ZIC 1	yes|up	no|up	no|down	1
gene20064	MMRN1	multimerin 1	yes|up	no|up	no|down	1
gene20066	LOC106049570	keratin, type I cytoskeletal 15-like	yes|down	yes|down	no|up	2
gene20067	KRT23	keratin 23, type I	yes|down	yes|down	no|down	2
gene20069	LOC106049573	keratin, type I cytoskeletal 12-like	yes|down	yes|down	no|down	2
gene4274	LOC106032135	mesothelin-like	yes|down	yes|down	no|down	2
gene4270	CHTF18	chromosome transmission fidelity factor 18	yes|down	no|down	no|up	1
gene3951	LOC106031921	semaphorin-4G-like	yes|down	no|down	no|up	1
gene11690	SGCG	sarcoglycan, gamma (35kDa dystrophin-associated glycoprotein), transcript variant X2	yes|up	yes|up	no|up	2
gene10348	INSIG1	insulin induced gene 1	yes|up	yes|up	no|up	2
gene11741	LMNB1	lamin B1, transcript variant X1	yes|down	yes|down	no|up	2
gene10619	IGF2BP2	insulin-like growth factor 2 mRNA binding protein 2, transcript variant X1	yes|down	yes|down	no|down	2
gene19259	LOC106048707	uncharacterized LOC106048707, transcript variant X1	yes|down	yes|down	no|up	2
gene17347	PMFBP1	polyamine modulated factor 1 binding protein 1, transcript variant X1	yes|down	yes|down	no|down	2
gene10163	SGMS2	sphingomyelin synthase 2, transcript variant X3	yes|up	no|up	no|down	1
gene18037	WDR35	WD repeat domain 35	yes|up	yes|up	no|down	2
gene1237	LOC106041673	uncharacterized LOC106041673, transcript variant X1	yes|down	yes|down	no|down	2
gene4897	LOC106032849	uncharacterized LOC106032849	yes|down	yes|down	no|down	2
gene20840	LOC106029714	class II histocompatibility antigen, B-L beta chain-like	yes|down	yes|down	no|down	2
gene18290	ANTXR1	anthrax toxin receptor 1	yes|up	yes|up	no|up	2
gene18293	GKN2	gastrokine 2	yes|down	yes|down	no|down	2
gene18295	ARHGAP25	Rho GTPase activating protein 25	yes|down	yes|down	no|up	2
gene18296	CDS2	CDP-diacylglycerol synthase (phosphatidate cytidylyltransferase) 2	yes|up	yes|up	yes|up	3
gene1155	MATN4	matrilin 4	yes|down	yes|down	no|up	2
gene9134	LOC106037563	laminin subunit alpha-3-like	yes|up	no|up	no|down	1
gene9133	ANKRD29	ankyrin repeat domain 29, transcript variant X1	yes|up	no|up	no|down	1
gene16349	PDE1C	phosphodiesterase 1C, calmodulin-dependent 70kDa, transcript variant X1	yes|up	yes|up	no|up	2
gene2447	HOXA2	homeobox A2	yes|down	yes|down	no|down	2
gene2442	SNX10	sorting nexin 10, transcript variant X1	yes|down	no|down	no|up	1
gene16342	FKBP9	FK506 binding protein 9, 63 kDa	yes|up	yes|up	no|up	2
gene7129	PRSS35	protease, serine, 35	yes|up	no|up	no|down	1
gene752	SYNE3	spectrin repeat containing, nuclear envelope family member 3, transcript variant X1	yes|up	no|up	no|down	1
gene16832	LOC106046046	interleukin-9 receptor-like, transcript variant X1	yes|down	yes|down	no|down	2
gene17529	NBEAL2	neurobeachin-like 2	yes|down	yes|down	no|up	2
gene16831	IL21R	interleukin 21 receptor, transcript variant X4	yes|down	yes|down	no|down	2
gene18619	LOC106047988	uncharacterized LOC106047988	yes|down	yes|down	no|down	2
gene13649	TLR7	toll-like receptor 7, transcript variant X1	yes|down	yes|down	no|up	2
gene13646	LOC106042564	uncharacterized LOC106042564	yes|up	no|up	no|down	1
gene17522	LOC106046814	GTPase IMAP family member 2-like	yes|down	yes|down	no|up	2
gene13860	BOD1	biorientation of chromosomes in cell division 1	yes|down	yes|down	no|up	2
gene18341	ENDOU	endonuclease, polyU-specific	yes|down	yes|down	no|down	2
gene13867	KIF20A	kinesin family member 20A	yes|down	yes|down	no|up	2
gene18344	LOC106047723	twist-related protein 2-like	yes|down	yes|down	no|up	2
gene16996	SNX24	sorting nexin 24, transcript variant X1	yes|up	no|up	no|down	1
gene19819	SAV1	salvador family WW domain containing protein 1, transcript variant X2	yes|up	no|up	no|down	1
gene12116	HRH3	histamine receptor H3	yes|down	yes|down	no|down	2
gene19817	ABHD12B	abhydrolase domain containing 12B	yes|up	yes|up	yes|up	3
gene16122	SHTN1	shootin 1, transcript variant X1	yes|down	yes|down	no|down	2
gene15688	MGME1	mitochondrial genome maintenance exonuclease 1, transcript variant X3	yes|down	yes|down	no|down	2
gene12597	RTN4RL1	reticulon 4 receptor-like 1	yes|up	yes|up	no|up	2
gene2159	FAP	fibroblast activation protein, alpha, transcript variant X1	yes|up	no|up	no|down	1
gene3313	KNTC1	kinetochore associated 1	yes|down	yes|down	no|down	2
gene7304	FGL2	fibrinogen-like 2	yes|up	no|up	no|down	1
gene7300	FBXL13	F-box and leucine-rich repeat protein 13	yes|up	yes|up	no|down	2
gene7302	FAM185A	family with sequence similarity 185, member A	yes|up	yes|up	no|down	2
gene6318	AGAP1	ArfGAP with GTPase domain, ankyrin repeat and PH domain 1, transcript variant X1	yes|up	no|up	no|down	1
gene17830	LOC106047130	bactericidal permeability-increasing protein-like	yes|up	no|up	no|down	1
gene579	ABLIM2	actin binding LIM protein family, member 2, transcript variant X1	yes|up	yes|up	no|up	2
gene3796	TMEM229B	transmembrane protein 229B, transcript variant X9	yes|down	yes|down	no|up	2
gene1441	LOC106040826	transmembrane protein 178B-like	yes|down	no|down	no|up	1
gene5655	LARP6	La ribonucleoprotein domain family, member 6, transcript variant X1	yes|up	no|up	no|down	1
gene14479	HUNK	hormonally up-regulated Neu-associated kinase	yes|up	yes|up	no|down	2
gene5650	LOC106033710	uncharacterized LOC106033710, transcript variant X1	yes|down	yes|down	no|up	2
gene5653	THSD4	thrombospondin, type I, domain containing 4, transcript variant X1	yes|up	no|up	no|down	1
gene8503	ACVR2B	activin A receptor, type IIB	yes|up	no|up	no|down	1
gene3172	PKP2	plakophilin 2	yes|up	yes|up	no|down	2
gene14477	MIS18A	MIS18 kinetochore protein A	yes|down	yes|down	no|up	2
gene12339	NCF1	neutrophil cytosolic factor 1	yes|down	no|down	no|up	1
gene15479	PTPRZ1	protein tyrosine phosphatase, receptor-type, Z polypeptide 1	yes|down	yes|down	no|up	2
gene15475	CPED1	cadherin-like and PC-esterase domain containing 1, transcript variant X1	yes|up	yes|up	no|up	2
gene15470	KCND2	potassium channel, voltage gated Shal related subfamily D, member 2	yes|up	yes|up	no|up	2
gene16655	FOXP4	forkhead box P4	yes|up	no|down	yes|down	2
gene15877	LOC106044980	uncharacterized LOC106044980, transcript variant X2	yes|down	yes|down	no|down	2
gene14658	UACA	uveal autoantigen with coiled-coil domains and ankyrin repeats, transcript variant X1	yes|up	yes|up	no|down	2
gene18503	LVRN	laeverin	yes|up	no|up	no|down	1
gene600	EVC	Ellis van Creveld protein	yes|up	yes|up	no|up	2
gene5782	KIF18A	kinesin family member 18A	yes|down	yes|down	no|up	2
gene4653	PRDM1	PR domain containing 1, with ZNF domain, transcript variant X1	yes|down	yes|down	no|down	2
gene4651	AIM1	absent in melanoma 1	yes|down	yes|down	no|down	2
gene20279	LOC106049785	collagen alpha-1(XI) chain-like	yes|up	yes|up	no|up	2
gene2449	HOXA4	homeobox A4	yes|down	no|down	no|up	1
gene5436	XYLT1	xylosyltransferase I, transcript variant X1	yes|up	yes|up	no|down	2
gene15308	GPR141	G protein-coupled receptor 141	yes|down	yes|down	no|up	2
gene2944	ATP6V1C2	ATPase, H+ transporting, lysosomal 42kDa, V1 subunit C2, transcript variant X1	yes|down	yes|down	no|down	2
gene14255	CPXM1	carboxypeptidase X (M14 family), member 1	yes|up	yes|up	no|up	2
gene15301	EEPD1	endonuclease/exonuclease/phosphatase family domain containing 1	yes|up	yes|up	no|up	2
gene15303	ANLN	anillin actin binding protein	yes|down	yes|down	no|down	2
gene15302	KIAA0895	KIAA0895 ortholog, transcript variant X1	yes|up	yes|up	no|up	2
gene15304	AOAH	acyloxyacyl hydrolase (neutrophil), transcript variant X1	yes|down	yes|down	no|down	2
gene20019	SCARA3	scavenger receptor class A, member 3	yes|up	no|up	no|down	1
gene20727	LOC106029595	basic salivary proline-rich protein 2-like	yes|down	yes|down	no|up	2
gene20720	LOC106029588	disintegrin and metalloproteinase domain-containing protein 2-like	yes|up	no|up	no|down	1
gene11683	SPATA13	spermatogenesis associated 13, transcript variant X1	yes|up	no|up	no|down	1
gene9309	MTCP1	mature T-cell proliferation 1, transcript variant X1	yes|up	yes|up	no|up	2
gene11688	LOC106040364	uncharacterized LOC106040364	yes|up	yes|up	no|up	2
gene4266	LMF1	lipase maturation factor 1	yes|up	yes|up	no|up	2
gene9302	LOC106037716	probable G-protein coupled receptor 34, transcript variant X1	yes|down	yes|down	no|up	2
gene9301	TRMT2B	tRNA methyltransferase 2 homolog B (S. cerevisiae), transcript variant X1	yes|down	no|down	no|up	1
gene9300	TMEM35	transmembrane protein 35	yes|down	yes|down	no|down	2
gene19242	LOC106048696	keratin, type II cytoskeletal 6C-like	yes|down	yes|down	no|down	2
gene10371	DIP2C	disco-interacting protein 2 homolog C, transcript variant X1	yes|up	no|up	no|down	1
gene11205	LOC106039769	apolipoprotein A-I	yes|up	yes|up	no|down	2
gene17686	TRAF3	TNF receptor-associated factor 3, transcript variant X3	yes|down	yes|down	no|down	2
gene10402	HTRA1	HtrA serine peptidase 1, transcript variant X1	yes|up	yes|up	no|up	2
gene10159	LEF1	lymphoid enhancer-binding factor 1, transcript variant X1	yes|down	yes|down	no|up	2
gene17689	RCOR1	REST corepressor 1	yes|down	yes|down	no|down	2
gene11973	NACC2	NACC family member 2, BEN and BTB (POZ) domain containing	yes|up	yes|up	no|down	2
gene17756	PAK6	p21 protein (Cdc42/Rac)-activated kinase 6, transcript variant X4	yes|down	no|up	yes|up	2
gene17757	BUB1B	BUB1 mitotic checkpoint serine/threonine kinase B	yes|down	no|down	no|up	1
gene17751	KNSTRN	kinetochore-localized astrin/SPAG5 binding protein	yes|down	no|down	no|up	1
gene18090	SNX22	sorting nexin 22, transcript variant X1	yes|down	yes|down	no|up	2
gene19025	FGD2	FYVE, RhoGEF and PH domain containing 2, transcript variant X1	yes|down	no|down	no|up	1
gene19027	PLXDC1	plexin domain containing 1	yes|up	no|up	no|down	1
gene19021	RAB44	RAB44, member RAS oncogene family, transcript variant X1	yes|down	yes|down	no|up	2
gene1200	LOC106041390	uncharacterized LOC106041390	yes|down	yes|down	no|up	2
gene19023	PI16	peptidase inhibitor 16, transcript variant X1	yes|up	yes|up	no|up	2
gene7689	ANKS6	ankyrin repeat and sterile alpha motif domain containing 6	yes|up	yes|up	no|up	2
gene4888	GALNT10	polypeptide N-acetylgalactosaminyltransferase 10	yes|up	no|up	no|down	1
gene1149	RALY	RALY heterogeneous nuclear ribonucleoprotein	yes|down	yes|down	no|down	2
gene13989	COL4A3BP	collagen, type IV, alpha 3 (Goodpasture antigen) binding protein	yes|up	no|up	no|down	1
gene13985	POC5	POC5 centriolar protein, transcript variant X1	yes|down	yes|down	no|down	2
gene14154	LOC106043112	receptor-interacting serine/threonine-protein kinase 2-like	yes|down	no|down	no|up	1
gene13981	STK17A	serine/threonine kinase 17a	yes|down	yes|down	no|down	2
gene10885	LOC106039393	zinc finger protein Gfi-1-like	yes|down	no|down	no|up	1
gene5134	CMTR2	cap methyltransferase 2, transcript variant X5	yes|down	no|down	no|up	1
gene9430	MFSD2A	major facilitator superfamily domain containing 2A	yes|down	yes|down	yes|down	3
gene9433	LOC106037880	protein FAM49B-like	yes|down	yes|down	no|up	2
gene17352	ZNF821	zinc finger protein 821, transcript variant X1	yes|down	yes|down	no|down	2
gene18196	RAB39A	RAB39A, member RAS oncogene family	yes|down	yes|down	no|down	2
gene15262	RNF223	ring finger protein 223	yes|down	yes|down	no|down	2
gene13863	LOC106042779	neuron-specific protein family member 2	yes|up	yes|up	no|up	2
gene13189	LOC106042065	chromosome unknown open reading frame, human C7orf60, transcript variant X1	yes|up	no|up	no|down	1
gene12852	IL18RAP	interleukin 18 receptor accessory protein, transcript variant X3	yes|down	no|down	no|up	1
gene12853	IL18R1	interleukin 18 receptor 1	yes|down	yes|down	no|up	2
gene18347	RACGAP1	Rac GTPase activating protein 1, transcript variant X2	yes|down	yes|down	no|up	2
gene13672	LOC106042558	uncharacterized LOC106042558	yes|down	no|down	no|up	1
gene16801	PRKCB	protein kinase C, beta, transcript variant X1	yes|down	yes|down	no|up	2
gene17530	CCDC12	coiled-coil domain containing 12, transcript variant X1	yes|down	no|down	no|up	1
gene13850	SH3PXD2B	SH3 and PX domains 2B, transcript variant X1	yes|up	yes|up	no|up	2
gene12101	OGFR	opioid growth factor receptor, transcript variant X1	yes|down	yes|down	no|down	2
gene16487	LOC106045683	mucosa-associated lymphoid tissue lymphoma translocation protein 1-like, transcript variant X1	yes|down	yes|down	no|up	2
gene16484	MATK	megakaryocyte-associated tyrosine kinase, transcript variant X1	yes|down	yes|down	yes|down	3
gene13456	STARD4	StAR-related lipid transfer (START) domain containing 4	yes|down	yes|down	no|down	2
gene12589	PIK3C2B	phosphatidylinositol-4-phosphate 3-kinase, catalytic subunit type 2 beta	yes|down	no|down	no|up	1
gene12586	NFASC	neurofascin, transcript variant X4	yes|up	yes|up	no|up	2
gene12585	CNTN2	contactin 2 (axonal)	yes|up	yes|up	no|down	2
gene6496	ADAP2	ArfGAP with dual PH domains 2, transcript variant X1	yes|down	no|down	no|up	1
gene6495	RNF135	ring finger protein 135	yes|down	yes|down	no|up	2
gene3558	LOC106031351	dynein light chain 1, cytoplasmic, transcript variant X3	yes|down	yes|down	no|down	2
gene16126	MEGF10	multiple EGF-like-domains 10	yes|up	no|up	yes|down	2
gene3301	FAM109A	family with sequence similarity 109, member A, transcript variant X2	yes|down	yes|down	no|down	2
gene15689	OVOL2	ovo-like zinc finger 2	yes|down	yes|down	no|down	2
gene2167	FIGN	fidgetin, transcript variant X1	yes|up	yes|up	no|up	2
gene7407	LRRC70	leucine rich repeat containing 70	yes|up	no|up	no|up	1
gene15680	SYNDIG1	synapse differentiation inducing 1, transcript variant X1	yes|up	yes|up	no|up	2
gene15683	LOC106044772	cystatin-like	yes|up	yes|up	no|up	2
gene20760	LOC106029629	uncharacterized LOC106029629	yes|up	no|up	no|down	1
gene3782	GALNT16	polypeptide N-acetylgalactosaminyltransferase 16, transcript variant X2	yes|up	yes|up	no|down	2
gene1459	LOC106044031	uncharacterized LOC106044031	yes|down	no|no test	no|up	1
gene4796	TGFBI	transforming growth factor, beta-induced, 68kDa, transcript variant X1	yes|up	no|down	yes|down	2
gene4795	LOC106032655	leukocyte cell-derived chemotaxin-2-like	yes|down	yes|down	no|up	2
gene4794	LOC106032697	myeloid protein 1	yes|down	yes|down	no|up	2
gene3160	LOC106030963	uncharacterized LOC106030963, transcript variant X2	yes|down	no|down	no|up	1
gene16660	DENND2D	DENN/MADD domain containing 2D	yes|down	yes|down	no|up	2
gene16667	LOC106045877	alpha-1,3-mannosyl-glycoprotein 4-beta-N-acetylglucosaminyltransferase C-like, transcript variant X4	yes|down	yes|down	no|up	2
gene16665	PPFIA4	protein tyrosine phosphatase, receptor type, f polypeptide (PTPRF), interacting protein (liprin), alpha 4	yes|down	no|up	yes|up	2
gene7519	IGF1	insulin-like growth factor 1 (somatomedin C)	yes|up	yes|up	no|up	2
gene4642	OSTM1	osteopetrosis associated transmembrane protein 1	yes|down	no|down	no|up	1
gene4645	SOBP	sine oculis binding protein homolog, transcript variant X1	yes|up	yes|up	no|down	2
gene20267	TPP1	tripeptidyl peptidase I	yes|up	yes|up	no|down	2
gene6100	KATNA1	katanin p60 (ATPase containing) subunit A 1	yes|down	yes|down	no|down	2
gene6107	LOC106034274	uncharacterized LOC106034274, transcript variant X2	yes|down	yes|down	no|down	2
gene20481	LOC106029344	C-type lectin domain family 2 member D-like	yes|down	yes|down	no|down	2
gene7476	PLCXD1	phosphatidylinositol-specific phospholipase C, X domain containing 1, transcript variant X4	yes|down	yes|down	no|down	2
gene7475	LOC106035673	regucalcin-like, transcript variant X1	yes|down	yes|down	no|down	2
gene18970	MYO1F	myosin IF, transcript variant X1	yes|down	yes|down	no|down	2
gene2959	FAM84A	family with sequence similarity 84, member A	yes|down	yes|down	no|up	2
gene18974	ACER1	alkaline ceramidase 1	yes|down	yes|down	no|up	2
gene20006	LOC106049502	cadherin-related family member 2-like	yes|down	no|down	no|up	1
gene20002	TNIP3	TNFAIP3 interacting protein 3, transcript variant X1	yes|down	yes|down	no|up	2
gene20003	NDNF	neuron-derived neurotrophic factor, transcript variant X1	yes|down	yes|down	no|up	2
gene13528	ACER3	alkaline ceramidase 3, transcript variant X1	yes|up	yes|up	no|up	2
gene5173	E2F4	E2F transcription factor 4, p107/p130-binding	yes|down	yes|down	no|up	2
gene20733	LOC106029601	butyrophilin subfamily 1 member A1-like	yes|down	no|down	no|up	1
gene4253	SLC5A10	solute carrier family 5 (sodium/sugar cotransporter), member 10, transcript variant X1	yes|down	yes|down	no|up	2
gene4250	SHMT1	serine hydroxymethyltransferase 1 (soluble)	yes|down	yes|down	no|up	2
gene4257	CACNA1H	calcium channel, voltage-dependent, T type, alpha 1H subunit, transcript variant X1	yes|up	yes|up	no|up	2
gene19234	LOC106048691	keratin, type II cytoskeletal 4-like, transcript variant X1	yes|down	yes|down	no|up	2
gene19231	LOC106048669	uncharacterized LOC106048669	yes|up	no|up	no|down	1
gene10366	NCAPG2	non-SMC condensin II complex, subunit G2, transcript variant X4	yes|down	yes|down	no|up	2
gene11764	NRG1	neuregulin 1, transcript variant X3	yes|up	yes|up	no|down	2
gene11943	LOC106040633	uncharacterized LOC106040633, transcript variant X1	yes|down	yes|down	no|up	2
gene20048	IQCD	IQ motif containing D, transcript variant X2	yes|up	no|up	no|down	1
gene7958	KCNE4	potassium channel, voltage gated subfamily E regulatory beta subunit 4	yes|up	no|up	no|down	1
gene10098	MAD2L1	MAD2 mitotic arrest deficient-like 1 (yeast)	yes|down	yes|down	no|up	2
gene19589	PLEKHO1	pleckstrin homology domain containing, family O member 1	yes|down	yes|down	no|down	2
gene17310	LOC106046582	cbp/p300-interacting transactivator 3	yes|down	no|down	no|up	1
gene910	CCDC80	coiled-coil domain containing 80	yes|up	yes|up	no|up	2
gene913	F5	coagulation factor V (proaccelerin, labile factor), transcript variant X1	yes|up	no|down	yes|down	2
gene9846	KIF15	kinesin family member 15	yes|down	yes|down	no|up	2
gene13994	LOC106042924	uncharacterized LOC106042924	yes|down	yes|down	no|up	2
gene1130	LIPI	lipase, member I	yes|down	yes|down	no|down	2
gene13993	GCNT4	glucosaminyl (N-acetyl) transferase 4, core 2, transcript variant X2	yes|down	yes|down	no|up	2
gene1133	SAMSN1	SAM domain, SH3 domain and nuclear localization signals 1	yes|down	yes|down	no|up	2
gene10896	CDC7	cell division cycle 7, transcript variant X1	yes|down	no|down	no|up	1
gene5122	RFWD3	ring finger and WD repeat domain 3, transcript variant X2	yes|down	no|down	no|up	1
gene5120	FA2H	fatty acid 2-hydroxylase	yes|down	yes|down	no|down	2
gene10892	EPHX4	epoxide hydrolase 4	yes|up	yes|up	no|up	2
gene700	RBPJ	recombination signal binding protein for immunoglobulin kappa J region, transcript variant X1	yes|up	yes|up	no|down	2
gene8421	LOC106036766	leucine zipper putative tumor suppressor 3, transcript variant X2	yes|up	yes|up	no|up	2
gene15698	DTD1	D-tyrosyl-tRNA deacylase 1	yes|down	no|down	no|up	1
gene8424	SLC4A11	solute carrier family 4, sodium borate transporter, member 11, transcript variant X1	yes|down	yes|down	no|up	2
gene18181	LOC106047531	F-box only protein 21-like, transcript variant X1	yes|down	no|down	no|up	1
gene17323	LOC106046592	cadherin-1-like	yes|down	yes|down	no|down	2
gene16327	PYROXD1	pyridine nucleotide-disulphide oxidoreductase domain 1	yes|up	yes|up	no|up	2
gene16320	SOX5	SRY (sex determining region Y)-box 5	yes|up	yes|up	no|down	2
gene13196	FOXP2	forkhead box P2	yes|up	yes|up	no|down	2
gene1681	LOC106046673	glioma pathogenesis-related protein 1-like	yes|down	yes|down	no|down	2
gene1684	CAPS2	calcyphosine 2, transcript variant X3	yes|up	yes|up	no|up	2
gene16810	PLK1	polo-like kinase 1	yes|down	yes|down	no|up	2
gene12821	GCC2	GRIP and coiled-coil domain containing 2	yes|up	yes|up	no|up	2
gene16816	SCNN1B	sodium channel, non voltage gated 1 beta subunit	yes|up	yes|up	no|up	2
gene13840	HBEGF	heparin-binding EGF-like growth factor	yes|down	yes|down	yes|down	3
gene13665	LOC106042544	protein WWC3-like	yes|up	yes|up	no|down	2
gene19763	GINS2	GINS complex subunit 2 (Psf2 homolog)	yes|down	yes|down	no|up	2
gene19767	IRF8	interferon regulatory factor 8	yes|down	yes|down	no|down	2
gene12132	OVCH2	ovochymase 2, transcript variant X1	yes|up	no|up	no|down	1
gene12131	EDN3	endothelin 3	yes|down	yes|down	no|up	2
gene12130	PHACTR3	phosphatase and actin regulator 3, transcript variant X1	yes|up	no|up	no|down	1
gene12138	LOC106040874	uncharacterized LOC106040874, transcript variant X3	yes|down	no|down	no|up	1
gene17512	CDC25A	cell division cycle 25A	yes|down	yes|down	no|up	2
gene2791	LOC106030559	uncharacterized LOC106030559, transcript variant X1	yes|up	yes|up	no|up	2
gene6487	TEX2	testis expressed 2	yes|up	yes|up	no|up	2
gene2313	CD28	CD28 molecule	yes|down	yes|down	no|up	2
gene2315	LOC106030066	inducible T-cell costimulator-like	yes|down	yes|down	no|up	2
gene2314	CTLA4	cytotoxic T-lymphocyte-associated protein 4	yes|down	yes|down	no|down	2
gene2317	PARD3B	par-3 family cell polarity regulator beta	yes|up	yes|up	no|down	2
gene3373	TCTN2	tectonic family member 2	yes|up	yes|up	no|down	2
gene2171	COBLL1	cordon-bleu WH2 repeat protein-like 1, transcript variant X1	yes|up	yes|up	no|up	2
gene2177	GALNT3	polypeptide N-acetylgalactosaminyltransferase 3, transcript variant X1	yes|down	yes|down	no|down	2
gene15679	LOC106044744	uncharacterized LOC106044744, transcript variant X5	yes|down	yes|down	no|down	2
gene15678	CST7	cystatin F (leukocystatin)	yes|down	no|down	no|up	1
gene929	GPR161	G protein-coupled receptor 161, transcript variant X2	yes|up	yes|up	no|down	2
gene1468	HSD17B12	hydroxysteroid (17-beta) dehydrogenase 12	yes|up	yes|up	no|down	2
gene1469	LOC106044166	uncharacterized LOC106044166, transcript variant X1	yes|down	no|down	no|up	1
gene1463	ALX4	ALX homeobox 4	yes|up	no|up	no|down	1
gene1292	APCDD1L	adenomatosis polyposis coli down-regulated 1-like	yes|up	yes|up	no|down	2
gene3194	TMEM178B	transmembrane protein 178B	yes|up	no|up	no|down	1
gene3198	LOC106030999	transcription factor SPT20 homolog, transcript variant X5	yes|up	yes|up	no|down	2
gene15414	LOC106044440	uncharacterized LOC106044440	yes|down	yes|down	no|down	2
gene12319	WBSCR17	Williams-Beuren syndrome chromosome region 17, transcript variant X1	yes|up	no|up	no|down	1
gene15412	ANKRD10	ankyrin repeat domain 10, transcript variant X1	yes|down	yes|down	no|down	2
gene12317	CALN1	calneuron 1, transcript variant X1	yes|up	yes|up	no|up	2
gene12315	SBDS	Shwachman-Bodian-Diamond syndrome	yes|up	yes|up	no|up	2
gene16670	PKP1	plakophilin 1, transcript variant X1	yes|down	yes|down	no|down	2
gene16672	LAD1	ladinin 1, transcript variant X1	yes|down	yes|down	no|down	2
gene12310	WBSCR27	Williams Beuren syndrome chromosome region 27	yes|up	yes|up	no|up	2
gene15892	LOC106044971	cathepsin L1-like, transcript variant X1	yes|down	yes|down	no|up	2
gene15897	LOC106044932	perilipin-3-like	yes|up	yes|up	yes|up	3
gene5654	LRRC49	leucine rich repeat containing 49, transcript variant X1	yes|up	no|up	no|down	1
gene15099	MED22	mediator complex subunit 22, transcript variant X1	yes|down	yes|down	no|up	2
gene7509	MXRA5	matrix-remodelling associated 5	yes|up	no|up	no|down	1
gene7500	XG	Xg blood group	yes|down	yes|down	no|down	2
gene15094	RALGDS	ral guanine nucleotide dissociation stimulator, transcript variant X1	yes|up	no|up	yes|down	2
gene20254	LOC106049750	zinc finger protein 883-like	yes|up	yes|up	no|up	2
gene6111	PLEKHG1	pleckstrin homology domain containing, family G (with RhoGef domain) member 1, transcript variant X1	yes|up	yes|up	no|up	2
gene1912	EXO1	exonuclease 1	yes|down	yes|down	no|up	2
gene1911	LOC106049170	uncharacterized LOC106049170, transcript variant X3	yes|down	no|down	no|up	1
gene14046	KIF4A	kinesin family member 4A, transcript variant X1	yes|down	yes|down	no|up	2
gene7617	LGALS2	lectin, galactoside-binding, soluble, 2	yes|down	no|down	no|up	1
gene7446	MGAT4A	mannosyl (alpha-1,3-)-glycoprotein beta-1,4-N-acetylglucosaminyltransferase, isozyme A, transcript variant X3	yes|down	yes|down	no|down	2
gene14237	EXOC6B	exocyst complex component 6B, transcript variant X1	yes|up	no|up	no|down	1
gene18968	ZAP70	zeta-chain (TCR) associated protein kinase 70kDa, transcript variant X3	yes|down	yes|down	no|up	2
gene7443	KIAA1211L	KIAA1211-like ortholog, transcript variant X1	yes|up	yes|up	no|up	2
gene7440	MITD1	MIT, microtubule interacting and transport, domain containing 1	yes|down	yes|down	no|down	2
gene15328	LOC106044340	uncharacterized LOC106044340	yes|down	yes|down	no|down	2
gene20033	FAAH2	fatty acid amide hydrolase 2	yes|down	yes|down	no|down	2
gene20032	LOC106049528	uncharacterized LOC106049528	yes|down	yes|down	no|up	2
gene18960	KIF3C	kinesin family member 3C	yes|up	no|up	no|down	1
gene14042	INPPL1	inositol polyphosphate phosphatase-like 1	yes|down	yes|down	no|down	2
gene20037	CCNB3	cyclin B3	yes|down	yes|down	no|up	2
gene20034	LOC106049534	uncharacterized LOC106049534	yes|down	no|down	yes|up	2
gene18710	GAD2	glutamate decarboxylase 2 (pancreatic islets and brain, 65kDa), transcript variant X1	yes|up	no|up	no|down	1
gene9326	FIGF	c-fos induced growth factor (vascular endothelial growth factor D)	yes|up	yes|up	no|up	2
gene4240	GID4	GID complex subunit 4	yes|down	yes|down	no|down	2
gene19220	WDR76	WD repeat domain 76	yes|down	no|down	no|up	1
gene11770	THAP1	THAP domain containing, apoptosis associated protein 1	yes|down	no|down	no|up	1
gene11408	TIMP4	TIMP metallopeptidase inhibitor 4, transcript variant X1	yes|up	no|up	no|down	1
gene11403	HRH1	histamine receptor H1, transcript variant X1	yes|up	yes|up	no|down	2
gene10429	TEX36	testis expressed 36	yes|up	yes|up	no|up	2
gene19595	LHFP	lipoma HMGIC fusion partner	yes|up	yes|up	no|up	2
gene1267	TFAP2C	transcription factor AP-2 gamma (activating enhancer binding protein 2 gamma)	yes|down	yes|down	no|up	2
gene1261	AURKA	aurora kinase A	yes|down	yes|down	no|up	2
gene19598	NPAS2	neuronal PAS domain protein 2	yes|up	yes|up	no|up	2
gene8185	CILP	cartilage intermediate layer protein, nucleotide pyrophosphohydrolase	yes|up	no|up	no|down	1
gene20819	LOC106029690	interferon-induced very large GTPase 1-like	yes|down	yes|down	no|down	2
gene8850	PLD4	phospholipase D family, member 4, transcript variant X1	yes|down	yes|down	no|up	2
gene923	LOC106038263	lymphotactin-like	yes|down	yes|down	yes|up	3
gene5113	TMEM53	transmembrane protein 53	yes|down	no|down	no|up	1
gene5110	LOC106033066	uncharacterized protein C1orf228 homolog, transcript variant X2	yes|down	no|down	no|up	1
gene9454	LOC106037965	zinc finger and BTB domain-containing protein 8A-like	yes|down	yes|down	no|down	2
gene18170	LOC106047519	endothelin B receptor-like	yes|down	yes|down	no|down	2
gene8984	CD40LG	CD40 ligand, transcript variant X1	yes|down	no|down	no|up	1
gene8985	VGLL1	vestigial-like family member 1, transcript variant X1	yes|down	yes|down	no|down	2
gene16312	LOC106045454	uncharacterized LOC106045454, transcript variant X1	yes|down	no|down	no|up	1
gene658	NCAPG	non-SMC condensin I complex, subunit G	yes|down	yes|down	no|up	2
gene650	LDB2	LIM domain binding 2, transcript variant X1	yes|up	yes|up	no|down	2
gene1697	LGR5	leucine-rich repeat containing G protein-coupled receptor 5, transcript variant X1	yes|up	yes|up	no|down	2
gene16861	DUSP4	dual specificity phosphatase 4	yes|down	yes|down	no|down	2
gene18317	SIAH2	siah E3 ubiquitin protein ligase 2	yes|down	yes|down	no|down	2
gene13836	NRG2	neuregulin 2	yes|down	yes|down	no|down	2
gene18311	GPR87	G protein-coupled receptor 87	yes|down	yes|down	no|down	2
gene13830	CKMT2	creatine kinase, mitochondrial 2 (sarcomeric)	yes|down	yes|down	no|down	2
gene18313	GPR171	G protein-coupled receptor 171	yes|up	no|up	no|down	1
gene19772	LOC106049262	selenium-binding protein 1-like	yes|down	yes|down	no|down	2
gene18427	NUF2	NUF2, NDC80 kinetochore complex component	yes|down	yes|down	no|up	2
gene2761	OSGIN2	oxidative stress induced growth inhibitor family member 2	yes|down	no|down	no|up	1
gene2766	LOC106030540	uncharacterized LOC106030540	yes|down	yes|down	no|up	2
gene6703	BASP1	brain abundant, membrane attached signal protein 1	yes|down	no|down	no|up	1
gene6475	PITPNC1	phosphatidylinositol transfer protein, cytoplasmic 1, transcript variant X1	yes|down	yes|down	no|down	2
gene6478	LOC106034642	chromosome unknown open reading frame, human C17orf58	yes|up	yes|up	no|up	2
gene6479	KPNA2	karyopherin alpha 2 (RAG cohort 1, importin alpha 1), transcript variant X1	yes|down	yes|down	no|up	2
gene3366	RILPL2	Rab interacting lysosomal protein-like 2	yes|down	yes|down	no|up	2
gene4405	FSTL5	follistatin-like 5	yes|up	no|up	no|down	1
gene3363	CDK2AP1	cyclin-dependent kinase 2 associated protein 1	yes|up	yes|up	no|up	2
gene17636	ADAM11	ADAM metallopeptidase domain 11	yes|up	yes|up	no|up	2
gene17801	LOC106047112	uncharacterized LOC106047112	yes|down	yes|down	no|up	2
gene17804	TPX2	TPX2, microtubule-associated, transcript variant X1	yes|down	yes|down	no|up	2
gene9604	PODXL2	podocalyxin-like 2, transcript variant X1	yes|up	no|up	no|down	1
gene17807	DUSP15	dual specificity phosphatase 15, transcript variant X1	yes|up	yes|up	no|up	2
gene9605	MCM2	minichromosome maintenance complex component 2	yes|down	no|down	no|up	1
gene8731	RNF208	ring finger protein 208	yes|down	no|down	no|up	1
gene12123	CDH4	cadherin 4, type 1, R-cadherin (retinal), transcript variant X1	yes|up	yes|up	no|down	2
gene3187	PTN	pleiotrophin	yes|down	yes|down	no|down	2
gene14429	LOC106043382	transient receptor potential cation channel subfamily M member 7-like	yes|down	yes|down	no|down	2
gene12301	RNF43	ring finger protein 43, transcript variant X1	yes|down	yes|down	no|up	2
gene16684	LOC106045884	tubulin alpha-8 chain	yes|down	yes|down	no|up	2
gene16686	LGR6	leucine-rich repeat containing G protein-coupled receptor 6	yes|up	yes|up	yes|up	3
gene3436	ZDHHC8	zinc finger, DHHC-type containing 8, transcript variant X1	yes|up	no|up	no|down	1
gene3342	LOC106031149	P2X purinoceptor 4-like, transcript variant X1	yes|up	yes|up	no|up	2
gene2585	MYO6	myosin VI, transcript variant X1	yes|up	yes|up	no|up	2
gene2587	FILIP1	filamin A interacting protein 1, transcript variant X1	yes|up	no|down	yes|down	2
gene15884	UHRF1	ubiquitin-like with PHD and ring finger domains 1	yes|down	yes|down	no|down	2
gene13562	FGF2	fibroblast growth factor 2 (basic), transcript variant X2	yes|up	yes|up	no|down	2
gene6291	HDAC4	histone deacetylase 4, transcript variant X1	yes|up	no|up	no|down	1
gene6293	LOC106034579	uncharacterized LOC106034579, transcript variant X1	yes|up	yes|up	no|up	2
gene5824	SPON1	spondin 1, extracellular matrix protein, transcript variant X1	yes|up	no|up	yes|down	2
gene14684	LOC106043657	uncharacterized LOC106043657	yes|up	yes|up	no|up	2
gene5752	E2F8	E2F transcription factor 8	yes|down	yes|down	no|up	2
gene5756	NAV2	neuron navigator 2	yes|up	no|up	no|down	1
gene4620	DDO	D-aspartate oxidase, transcript variant X1	yes|up	yes|up	no|up	2
gene20240	LOC106049759	tripartite motif-containing protein 7-like	yes|down	no|down	no|up	1
gene10654	PASK	PAS domain containing serine/threonine kinase	yes|down	no|down	no|up	1
gene7908	ZBTB38	zinc finger and BTB domain containing 38, transcript variant X1	yes|down	yes|down	no|down	2
gene19675	CLDN19	claudin 19	yes|down	yes|down	no|down	2
gene1901	CHRM3	cholinergic receptor, muscarinic 3, transcript variant X1	yes|up	no|up	no|down	1
gene14759	PAM	peptidylglycine alpha-amidating monooxygenase, transcript variant X1	yes|up	no|up	no|down	1
gene14209	STON1	stonin 1, transcript variant X1	yes|up	yes|up	no|up	2
gene14202	MSH2	mutS homolog 2	yes|down	no|down	no|up	1
gene14201	EPCAM	epithelial cell adhesion molecule	yes|down	yes|down	no|down	2
gene2975	VSNL1	visinin-like 1	yes|down	yes|down	no|up	2
gene20029	PTK2B	protein tyrosine kinase 2 beta	yes|down	yes|down	no|up	2
gene18953	LOC106048382	interferon-induced very large GTPase 1-like	yes|down	yes|down	no|down	2
gene20022	PBK	PDZ binding kinase	yes|down	yes|down	no|down	2
gene18950	LOC106048380	uncharacterized LOC106048380, transcript variant X2	yes|up	yes|up	no|up	2
gene20754	LOC106029623	E3 ubiquitin-protein ligase TRIM39-like	yes|down	no|down	no|up	1
gene20751	LOC106029620	acrosin-like	yes|down	yes|down	no|down	2
gene7983	NIM1K	NIM1 serine/threonine protein kinase, transcript variant X2	yes|down	no|down	no|up	1
gene5579	SEMA6D	sema domain, transmembrane domain (TM), and cytoplasmic domain, (semaphorin) 6D, transcript variant X1	yes|up	yes|up	yes|up	3
gene19210	ZNF710	zinc finger protein 710	yes|down	yes|down	no|down	2
gene19217	RASGRF1	Ras protein-specific guanine nucleotide-releasing factor 1, transcript variant X1	yes|down	yes|down	no|up	2
gene10308	FLVCR2	feline leukemia virus subgroup C cellular receptor family, member 2, transcript variant X2	yes|up	no|up	no|down	1
gene5570	FBN1	fibrillin 1, transcript variant X2	yes|up	no|up	no|down	1
gene10304	FOS	FBJ murine osteosarcoma viral oncogene homolog	yes|up	yes|down	yes|down	3
gene10124	LOC106038620	uncharacterized LOC106038620	yes|up	no|up	no|down	1
gene10123	ANK2	ankyrin 2, neuronal, transcript variant X1	yes|up	no|up	no|down	1
gene10129	ZGRF1	zinc finger, GRF-type containing 1, transcript variant X1	yes|down	no|down	no|up	1
gene11358	COQ10B	coenzyme Q10B	yes|up	yes|up	no|up	2
gene4181	CARD11	caspase recruitment domain family, member 11, transcript variant X1	yes|down	yes|down	no|up	2
gene8197	COBL	cordon-bleu WH2 repeat protein, transcript variant X3	yes|up	yes|up	no|up	2
gene9866	CXCR6	chemokine (C-X-C motif) receptor 6	yes|down	yes|down	no|up	2
gene9867	XCR1	chemokine (C motif) receptor 1	yes|down	yes|down	no|up	2
gene8849	AHNAK2	AHNAK nucleoprotein 2	yes|up	yes|up	no|up	2
gene9865	FYCO1	FYVE and coiled-coil domain containing 1	yes|up	yes|up	no|up	2
gene14034	EDA	ectodysplasin A	yes|up	no|up	no|down	1
gene9861	SNRPD1	small nuclear ribonucleoprotein D1 polypeptide 16kDa	yes|down	yes|down	no|down	2
gene397	CDHR1	cadherin-related family member 1, transcript variant X1	yes|up	no|up	no|down	1
gene937	COL8A1	collagen, type VIII, alpha 1	yes|up	yes|up	no|up	2
gene8845	GPR132	G protein-coupled receptor 132	yes|down	yes|down	no|down	2
gene423	TMEM254	transmembrane protein 254	yes|down	yes|down	no|down	2
gene5109	KIF2C	kinesin family member 2C, transcript variant X1	yes|down	yes|down	no|up	2
gene9466	LOC106037890	myotubularin-related protein 9-like	yes|down	no|down	no|up	1
gene8990	FHL1	four and a half LIM domains 1, transcript variant X1	yes|up	yes|up	no|up	2
gene9468	LCK	LCK proto-oncogene, Src family tyrosine kinase	yes|down	yes|down	no|up	2
gene17307	THEMIS2	thymocyte selection associated family member 2	yes|down	yes|down	no|up	2
gene12140	TEAD1	TEA domain family member 1 (SV40 transcriptional enhancer factor)	yes|up	no|up	no|down	1
gene17304	XKR8	XK, Kell blood group complex subunit-related family, member 8	yes|down	yes|down	no|down	2
gene16306	LOC106045455	guanine nucleotide-binding protein subunit alpha-14, transcript variant X1	yes|up	yes|up	no|up	2
gene17473	TK1	thymidine kinase 1, soluble	yes|down	yes|down	no|up	2
gene18781	GRIN3B	glutamate receptor, ionotropic, N-methyl-D-aspartate 3B	yes|up	no|up	no|down	1
gene18786	HMHA1	histocompatibility (minor) HA-1	yes|down	yes|down	no|down	2
gene6987	PRIMPOL	primase and polymerase (DNA-directed), transcript variant X1	yes|down	no|down	no|up	1
gene7668	GRAP2	GRB2-related adaptor protein 2, transcript variant X1	yes|down	no|down	no|up	1
gene12800	MYOC	myocilin, trabecular meshwork inducible glucocorticoid response	yes|up	yes|up	no|down	2
gene6725	EMILIN2	elastin microfibril interfacer 2, transcript variant X1	yes|up	no|up	yes|down	2
gene6726	LOC106034972	uncharacterized LOC106034972	yes|up	yes|down	yes|down	3
gene18305	AADAC	arylacetamide deacetylase, transcript variant X1	yes|up	yes|up	yes|up	3
gene18302	PROM2	prominin 2	yes|down	yes|down	no|down	2
gene18300	RASSF2	Ras association (RalGDS/AF-6) domain family member 2	yes|down	yes|down	no|down	2
gene19789	CTSK	cathepsin K	yes|up	yes|up	no|up	2
gene9513	COL8A2	collagen, type VIII, alpha 2	yes|up	yes|up	no|down	2
gene18430	RNF222	ring finger protein 222, transcript variant X1	yes|down	yes|down	no|down	2
gene13313	LOC106042183	lymphocyte antigen 6E-like	yes|down	yes|down	no|down	2
gene13315	LOC106042188	lymphocyte antigen 6E-like	yes|down	yes|down	no|up	2
gene17700	HSP90AA1	heat shock protein 90kDa alpha (cytosolic), class A member 1	yes|down	yes|down	yes|down	3
gene4514	TMEM200A	transmembrane protein 200A	yes|up	no|up	no|down	1
gene6465	LOC106034680	uncharacterized LOC106034680	yes|up	yes|up	no|down	2
gene9711	SLC25A27	solute carrier family 25, member 27	yes|down	no|up	yes|up	2
gene8354	OXTR	oxytocin receptor	yes|up	yes|up	no|down	2
gene2370	ITGB2	integrin, beta 2 (complement component 3 receptor 3 and 4 subunit), transcript variant X1	yes|down	yes|down	no|down	2
gene5818	TCP11L1	t-complex 11, testis-specific-like 1, transcript variant X2	yes|up	yes|up	no|down	2
gene13603	LOC106042488	uncharacterized LOC106042488, transcript variant X1	yes|down	yes|down	no|down	2
gene5814	PRRG4	proline rich Gla (G-carboxyglutamic acid) 4 (transmembrane)	yes|down	yes|down	no|down	2
gene2716	NDUFAF6	NADH dehydrogenase (ubiquinone) complex I, assembly factor 6	yes|up	yes|up	no|up	2
gene1484	RAG2	recombination activating gene 2, transcript variant X1	yes|down	yes|down	no|up	2
gene1485	RAG1	recombination activating gene 1	yes|down	yes|down	no|up	2
gene17879	LOC106047203		yes|up	no|up	no|down	1
gene12158	LYVE1	lymphatic vessel endothelial hyaluronan receptor 1	yes|up	no|up	no|down	1
gene14433	LOC106043396	uncharacterized LOC106043396	yes|down	no|down	no|up	1
gene14438	RUNX1	runt-related transcription factor 1	yes|down	yes|down	no|down	2
gene16693	TNS1	tensin 1	yes|up	yes|up	no|down	2
gene12371	KATNAL1	katanin p60 subunit A-like 1, transcript variant X2	yes|up	yes|up	no|up	2
gene12372	LOC106041153	uncharacterized LOC106041153, transcript variant X3	yes|up	yes|up	no|up	2
gene12378	USPL1	ubiquitin specific peptidase like 1	yes|down	yes|down	no|up	2
gene2598	KCNQ5	potassium channel, voltage gated KQT-like subfamily Q, member 5, transcript variant X3	yes|down	yes|down	no|down	2
gene2591	CD109	CD109 molecule	yes|up	no|up	no|down	1
gene2590	COL12A1	collagen, type XII, alpha 1	yes|up	yes|up	no|down	2
gene2596	MB21D1	Mab-21 domain containing 1	yes|down	yes|down	no|down	2
gene6403	LOC106034522	uncharacterized LOC106034522, transcript variant X1	yes|up	yes|up	no|down	2
gene5743	MPEG1	macrophage expressed 1	yes|down	yes|down	no|up	2
gene5740	LPXN	leupaxin	yes|down	yes|down	no|up	2
gene7523	PAH	phenylalanine hydroxylase	yes|down	yes|down	no|down	2
gene20239	LOC106049749	E3 ubiquitin-protein ligase TRIM41-like, transcript variant X1	yes|down	yes|down	no|up	2
gene6138	CLDN20	claudin 20, transcript variant X1	yes|up	yes|up	no|up	2
gene17090	IFT140	intraflagellar transport 140, transcript variant X1	yes|up	yes|up	no|up	2
gene14107	LOC106043053	uncharacterized LOC106043053, transcript variant X3	yes|down	no|down	no|up	1
gene7427	LOC106035572	interleukin-31 receptor subunit alpha-like	yes|down	yes|down	no|up	2
gene14211	LHCGR	luteinizing hormone/choriogonadotropin receptor	yes|up	yes|up	no|up	2
gene15343	ANK1	ankyrin 1, erythrocytic, transcript variant X2	yes|up	yes|up	no|down	2
gene15348	SFRP1	secreted frizzled-related protein 1	yes|down	yes|down	no|down	2
gene13934	RBM5	RNA binding motif protein 5, transcript variant X1	yes|down	yes|down	no|down	2
gene14690	TIPIN	TIMELESS interacting protein	yes|down	yes|down	no|up	2
gene4269	LOC106032129	uncharacterized LOC106032129	yes|down	no|down	no|up	1
gene19204	PRC1	protein regulator of cytokinesis 1	yes|down	yes|down	no|down	2
gene10334	AHSA1	AHA1, activator of heat shock 90kDa protein ATPase homolog 1 (yeast)	yes|down	yes|down	no|down	2
gene5563	FGF7	fibroblast growth factor 7, transcript variant X1	yes|up	no|up	no|down	1
gene17736	LOC106047024		yes|down	no|down	no|up	1
gene19208	SEMA4B	sema domain, immunoglobulin domain (Ig), transmembrane domain (TM) and short cytoplasmic domain, (semaphorin) 4B	yes|down	yes|down	no|down	2
gene4262	C1QTNF8	C1q and tumor necrosis factor related protein 8, transcript variant X2	yes|up	no|up	no|down	1
gene11424	ACAD9	acyl-CoA dehydrogenase family, member 9	yes|up	yes|up	no|down	2
gene11426	IQSEC1	IQ motif and Sec7 domain 1, transcript variant X1	yes|up	yes|up	no|down	2
gene17737	RAD51	RAD51 recombinase	yes|down	no|down	no|up	1
gene11429	NUP210	nucleoporin 210kDa, transcript variant X1	yes|down	yes|down	no|up	2
gene4903	LOC106032855	T-cell immunoglobulin and mucin domain-containing protein 4-like, transcript variant X1	yes|down	no|down	no|down	1
gene4906	ITK	IL2-inducible T-cell kinase	yes|down	yes|down	no|up	2
gene4190	RADIL	Ras association and DIL domains	yes|up	no|up	no|down	1
gene20768	LOC106029637	uncharacterized LOC106029637	yes|up	yes|up	no|up	2
gene539	POLN	polymerase (DNA directed) nu, transcript variant X1	yes|down	yes|down	no|up	2
gene18606	FKBP10	FK506 binding protein 10, 65 kDa, transcript variant X2	yes|up	yes|up	no|up	2
gene410	LOC106032461	uncharacterized LOC106032461	yes|down	yes|down	no|up	2
gene5179	CENPT	centromere protein T	yes|down	yes|down	no|up	2
gene10599	ANAPC13	anaphase promoting complex subunit 13	yes|down	yes|down	no|up	2
gene10846	LOC106039426	lipid phosphate phosphatase-related protein type 5	yes|up	yes|up	yes|up	3
gene10595	EHHADH	enoyl-CoA, hydratase/3-hydroxyacyl CoA dehydrogenase, transcript variant X3	yes|up	yes|up	yes|up	3
gene1108	GBE1	glucan (1,4-alpha-), branching enzyme 1, transcript variant X2	yes|up	yes|up	no|up	2
gene9475	LOC106037948	uncharacterized LOC106037948	yes|up	no|up	no|down	1
gene4994	DIO1	deiodinase, iodothyronine, type I	yes|up	no|up	no|down	1
gene8478	VILL	villin-like, transcript variant X1	yes|up	yes|up	no|up	2
gene9470	MARCKSL1	MARCKS-like 1	yes|down	yes|down	no|up	2
gene8472	CRHR2	corticotropin releasing hormone receptor 2, transcript variant X1	yes|up	yes|up	no|up	2
gene18157	LOC106047513	exocyst complex component 1-like, transcript variant X2	yes|down	yes|down	no|up	2
gene17316	EDN2	endothelin 2	yes|down	yes|down	no|down	2
gene17311	LOC106046563	oxysterol-binding protein 2-like	yes|down	no|down	no|up	1
gene10113	LOC106038631	uncharacterized LOC106038631, transcript variant X1	yes|down	yes|down	no|up	2
gene10112	LOC106038673	uncharacterized LOC106038673, transcript variant X3	yes|down	yes|down	no|up	2
gene10447	MKI67	marker of proliferation Ki-67	yes|down	yes|down	no|up	2
gene10117	NDST4	N-deacetylase/N-sulfotransferase (heparan glucosaminyl) 4, transcript variant X2	yes|down	yes|down	no|up	2
gene10440	DOCK1	dedicator of cytokinesis 1	yes|up	yes|up	no|down	2
gene18158	GLOD5	glyoxalase domain containing 5	yes|down	yes|down	no|up	2
gene16994	PRDM6	PR domain containing 6	yes|up	yes|up	no|up	2
gene13143	ASPM	asp (abnormal spindle) homolog, microcephaly associated (Drosophila)	yes|down	yes|down	no|down	2
gene17469	DNAH17	dynein, axonemal, heavy chain 17	yes|down	yes|down	yes|down	3
gene16992	CSNK1G3	casein kinase 1, gamma 3, transcript variant X2	yes|up	yes|up	no|up	2
gene13149	PRKAR2B	protein kinase, cAMP-dependent, regulatory, type II, beta, transcript variant X1	yes|up	yes|up	no|up	2
gene17463	ENGASE	endo-beta-N-acetylglucosaminidase	yes|down	yes|down	no|down	2
gene20652	LOC106029514	nck-associated protein 1-like	yes|down	yes|down	no|down	2
gene12816	LOC106041556	LIM homeobox transcription factor 1-alpha-like	yes|up	no|up	no|down	1
gene16847	LOC106046070	probable E3 ubiquitin-protein ligase HERC4	yes|down	yes|down	no|down	2
gene12812	METTL18	methyltransferase like 18	yes|down	no|down	no|up	1
gene18333	CP	ceruloplasmin (ferroxidase), transcript variant X1	yes|up	yes|up	no|up	2
gene18331	TM4SF1	transmembrane 4 L six family member 1	yes|up	no|up	no|down	1
gene9871	TOPBP1	topoisomerase (DNA) II binding protein 1, transcript variant X1	yes|down	yes|down	no|up	2
gene9870	LOC106038357	C-C chemokine receptor type 5-like, transcript variant X2	yes|down	yes|down	no|up	2
gene9875	TMEM108	transmembrane protein 108, transcript variant X2	yes|up	yes|up	no|up	2
gene2295	LOC106030047	uncharacterized LOC106030047, transcript variant X2	yes|down	no|down	no|up	1
gene6456	RGS9	regulator of G-protein signaling 9, transcript variant X1	yes|down	yes|down	no|down	2
gene6454	LOC106034700	uncharacterized LOC106034700	yes|down	yes|down	no|down	2
gene6451	ARSG	arylsulfatase G	yes|up	yes|up	no|up	2
gene11341	TMEFF2	transmembrane protein with EGF-like and two follistatin-like domains 2	yes|up	yes|up	no|up	2
gene17898	LOC106047213	uncharacterized LOC106047213, transcript variant X3	yes|down	no|down	no|up	1
gene9706	ENPP4	ectonucleotide pyrophosphatase/phosphodiesterase 4 (putative)	yes|down	yes|down	no|up	2
gene3345	IFT81	intraflagellar transport 81	yes|up	yes|up	no|down	2
gene4424	CPE	carboxypeptidase E, transcript variant X1	yes|up	yes|up	no|down	2
gene3431	LOC106031230	uncharacterized LOC106031230, transcript variant X1	yes|up	yes|up	no|up	2
gene6792	MC5R	melanocortin 5 receptor, transcript variant X3	yes|down	no|down	no|up	1
gene5829	OLFML1	olfactomedin-like 1	yes|up	yes|up	no|down	2
gene2120	LOC106029911	TGF-beta receptor type-2-like	yes|up	yes|up	no|up	2
gene2121	LOC106029913	uncharacterized LOC106029913	yes|down	no|down	no|up	1
gene15645	SLC1A4	solute carrier family 1 (glutamate/neutral amino acid transporter), member 4	yes|down	yes|down	no|down	2
gene2125	LOC106029917	glycerol-3-phosphate dehydrogenase [NAD(+)], cytoplasmic-like	yes|up	yes|up	no|up	2
gene16511	ATP8B3	ATPase, aminophospholipid transporter, class I, type 8B, member 3, transcript variant X1	yes|down	yes|down	no|down	2
gene1493	PAMR1	peptidase domain containing associated with muscle regeneration 1, transcript variant X1	yes|up	no|down	yes|down	2
gene1497	LOC106044451	uncharacterized LOC106044451, transcript variant X1	yes|down	yes|down	yes|down	3
gene17860	CCNDBP1	cyclin D-type binding-protein 1, transcript variant X1	yes|down	yes|down	no|down	2
gene16194	CENPE	centromere protein E, 312kDa	yes|down	yes|down	no|up	2
gene15429	MAMDC2	MAM domain containing 2	yes|up	no|up	no|down	1
gene15424	LOC106044464	riboflavin kinase-like	yes|down	yes|down	no|down	2
gene15423	GCNT1	glucosaminyl (N-acetyl) transferase 1, core 2, transcript variant X1	yes|down	yes|down	no|up	2
gene7086	DCSTAMP	dendrocyte expressed seven transmembrane protein	yes|down	yes|down	no|down	2
gene17645	ACTR3B	ARP3 actin-related protein 3 homolog B (yeast)	yes|down	no|down	no|up	1
gene5775	LOC106033949	uncharacterized LOC106033949, transcript variant X4	yes|up	yes|up	no|up	2
gene4608	LOC106032578	uncharacterized LOC106032578, transcript variant X1	yes|up	no|down	no|down	1
gene5770	ANO3	anoctamin 3	yes|up	yes|up	no|up	2
gene4861	DCTN4	dynactin 4 (p62), transcript variant X1	yes|up	yes|up	no|up	2
gene4607	LOC106032579	uncharacterized LOC106032579	yes|up	no|down	yes|down	2
gene4606	TRAF3IP2	TRAF3 interacting protein 2, transcript variant X1	yes|up	no|down	yes|down	2
gene20227	PPCS	phosphopantothenoylcysteine synthetase	yes|down	no|down	no|up	1
gene20224	PPIH	peptidylprolyl isomerase H (cyclophilin H), transcript variant X1	yes|down	yes|down	no|up	2
gene16734	LOC106045951	band 3 anion transport protein-like	yes|up	yes|up	no|down	2
gene2088	TFCP2L1	transcription factor CP2-like 1	yes|up	no|up	no|down	1
gene8894	LOC106037310	SET-binding protein-like, transcript variant X3	yes|up	no|up	no|down	1
gene6149	SNX9	sorting nexin 9	yes|up	yes|up	no|down	2
gene8897	SLC14A2	solute carrier family 14 (urea transporter), member 2	yes|down	no|down	no|up	1
gene7438	LOC106035746	lysozyme g, transcript variant X2	yes|down	yes|down	no|down	2
gene1201	LOC106040595	somatomedin-B and thrombospondin type-1 domain-containing protein-like	yes|up	yes|up	no|up	2
gene14772	FAM64A	family with sequence similarity 64, member A, transcript variant X1	yes|down	yes|down	no|up	2
gene7430	CD180	CD180 molecule, transcript variant X1	yes|down	no|down	no|up	1
gene20596	LOC106029453	IgGFc-binding protein-like	yes|down	yes|down	no|down	2
gene20599	LOC106029457	interferon-induced guanylate-binding protein 1-like	yes|down	yes|down	yes|down	3
gene15359	FGFR1	fibroblast growth factor receptor 1	yes|up	no|down	yes|down	2
gene11630	ITM2C	integral membrane protein 2C	yes|down	yes|down	no|down	2
gene11633	GPR55	G protein-coupled receptor 55, transcript variant X4	yes|down	no|down	no|up	1
gene14118	LPAR1	lysophosphatidic acid receptor 1, transcript variant X1	yes|up	yes|up	no|up	2
gene11635	LOC106040280	G-protein coupled receptor 35-like	yes|down	yes|down	no|down	2
gene11634	LOC106040278	G-protein coupled receptor 35-like	yes|down	yes|down	no|up	2
gene11188	MPZL3	myelin protein zero-like 3	yes|down	yes|down	no|down	2
gene11187	MPZL2	myelin protein zero-like 2	yes|down	yes|down	no|down	2
gene11186	CD3E	CD3e molecule, epsilon (CD3-TCR complex)	yes|down	yes|down	no|up	2
gene11185	CD3D	CD3d molecule, delta (CD3-TCR complex), transcript variant X1	yes|down	yes|down	no|up	2
gene15354	LOC106044415	disintegrin and metalloproteinase domain-containing protein 32-like	yes|up	no|up	no|down	1
gene11181	ANKK1	ankyrin repeat and kinase domain containing 1	yes|down	yes|down	no|up	2
gene17723	LOC106047082	ras-related and estrogen-regulated growth inhibitor-like	yes|down	yes|down	yes|down	3
gene10324	ZDHHC22	zinc finger, DHHC-type containing 22	yes|up	yes|up	no|up	2
gene10321	IRF2BPL	interferon regulatory factor 2 binding protein-like	yes|up	no|up	no|down	1
gene5558	LOC106033637	chromosome unknown open reading frame, human C15orf48	yes|down	yes|down	no|down	2
gene11987	GSN	gelsolin, transcript variant X1	yes|up	yes|up	no|up	2
gene11984	C5	complement component 5	yes|down	yes|down	no|up	2
gene11989	DAB2IP	DAB2 interacting protein	yes|up	yes|up	no|up	2
gene19859	LOC106049346	butyrophilin subfamily 3 member A3-like	yes|down	no|down	no|up	1
gene1257	LOC106041848	formin-H-like	yes|down	yes|down	no|up	2
gene6928	HGSNAT	heparan-alpha-glucosaminide N-acetyltransferase, transcript variant X1	yes|up	yes|up	no|up	2
gene20593	LOC106029451	antigen-presenting glycoprotein CD1d-like	yes|down	no|down	no|up	1
gene20778	LOC106029647	uncharacterized LOC106029647	yes|up	no|up	no|down	1
gene20821	LOC106029692	heparan sulfate glucosamine 3-O-sulfotransferase 3B1	yes|down	yes|down	no|up	2
gene8866	TDRD9	tudor domain containing 9	yes|up	yes|up	no|up	2
gene10581	NSUN7	NOP2/Sun domain family, member 7, transcript variant X1	yes|up	no|up	no|down	1
gene11855	WNT5A	wingless-type MMTV integration site family, member 5A	yes|up	no|up	no|down	1
gene5162	RLTPR	RGD motif, leucine rich repeats, tropomodulin domain and proline-rich containing	yes|down	yes|down	no|up	2
gene5161	LOC106033135	uncharacterized LOC106033135	yes|down	yes|down	no|up	2
gene19418	HOXC13	homeobox C13	yes|down	yes|down	no|down	2
gene10454	EBF3	early B-cell factor 3, transcript variant X4	yes|up	yes|up	no|up	2
gene10107	PRSS12	protease, serine, 12 (neurotrypsin, motopsin)	yes|down	no|down	no|up	1
gene10102	USP53	ubiquitin specific peptidase 53, transcript variant X1	yes|up	yes|up	no|up	2
gene19639	LOC106049125	protein S100-A12-like	yes|down	yes|down	no|down	2
gene16987	ZNF608	zinc finger protein 608	yes|up	yes|up	no|up	2
gene17105	SLA	Src-like-adaptor	yes|down	yes|down	yes|down	3
gene17107	TMEM71	transmembrane protein 71, transcript variant X2	yes|down	yes|down	no|down	2
gene19635	S100A16	S100 calcium binding protein A16	yes|down	yes|down	no|down	2
gene19634	LOC106049115	protein S100-A14-like, transcript variant X1	yes|down	yes|down	no|down	2
gene17451	RNF213	ring finger protein 213	yes|down	yes|down	no|down	2
gene887	QTRTD1	queuine tRNA-ribosyltransferase domain containing 1, transcript variant X1	yes|down	no|down	no|up	1
gene885	ZBTB20	zinc finger and BTB domain containing 20, transcript variant X1	yes|up	no|up	no|down	1
gene13804	CSMD3	CUB and Sushi multiple domains 3, transcript variant X1	yes|up	no|up	no|down	1
gene11636	LOC106040281	G-protein coupled receptor 35-like, transcript variant X4	yes|down	yes|down	no|down	2
gene400	NRG3	neuregulin 3, transcript variant X3	yes|up	yes|up	no|up	2
gene3860	COCH	cochlin	yes|up	no|up	yes|down	2
gene3867	LOC106031736	uncharacterized LOC106031736, transcript variant X2	yes|up	yes|up	no|up	2
gene2754	NECAB1	N-terminal EF-hand calcium binding protein 1	yes|up	yes|up	no|up	2
gene2287	CCDC141	coiled-coil domain containing 141, transcript variant X3	yes|down	yes|down	no|down	2
gene2286	TTN	titin	yes|down	yes|down	no|down	2
gene6446	LOC106034745	ATP-binding cassette sub-family A member 8-like	yes|up	no|up	no|down	1
gene1718	CPM	carboxypeptidase M	yes|up	no|down	yes|down	2
gene1578	LOC106045890	histone H4	yes|up	no|up	no|down	1
gene2357	FZD7	frizzled class receptor 7	yes|up	yes|up	no|up	2
gene9732	LOC106038256	lymphoid-restricted membrane protein-like, transcript variant X1	yes|down	yes|down	no|up	2
gene15988	LOC106045044	plexin-A1	yes|up	yes|up	no|down	2
gene3401	FZD10	frizzled class receptor 10	yes|down	yes|down	no|down	2
gene15635	MEIS1	Meis homeobox 1, transcript variant X1	yes|up	yes|up	no|up	2
gene15634	LOC106044703	uncharacterized LOC106044703, transcript variant X4	yes|up	yes|up	no|up	2
gene3409	ADGRD1	adhesion G protein-coupled receptor D1, transcript variant X1	yes|up	yes|up	no|down	2
gene16502	NFIC	nuclear factor I/C (CCAAT-binding transcription factor)	yes|up	yes|up	no|down	2
gene12686	RPAIN	RPA interacting protein, transcript variant X1	yes|down	no|down	no|down	1
gene12680	COL26A1	collagen, type XXVI, alpha 1, transcript variant X1	yes|up	yes|up	no|up	2
gene17853	CD40	CD40 molecule, TNF receptor superfamily member 5	yes|down	yes|down	no|down	2
gene17850	MMP9	matrix metallopeptidase 9	yes|down	yes|down	yes|down	3
gene13777	MKX	mohawk homeobox	yes|up	yes|up	no|up	2
gene17855	SLC35C2	solute carrier family 35 (GDP-fucose transporter), member C2, transcript variant X1	yes|down	yes|down	no|down	2
gene13775	LOC106042678	uncharacterized LOC106042678, transcript variant X2	yes|down	yes|down	no|down	2
gene12177	TRIM66	tripartite motif containing 66	yes|down	yes|down	no|up	2
gene16186	SLC39A8	solute carrier family 39 (zinc transporter), member 8	yes|down	yes|down	no|down	2
gene16183	PARD3	par-3 family cell polarity regulator, transcript variant X1	yes|up	yes|up	no|down	2
gene15183	LOC106044238	immunoglobulin superfamily containing leucine-rich repeat protein-like	yes|up	no|up	no|down	1
gene12351	RASL11A	RAS-like, family 11, member A	yes|down	yes|down	no|down	2
gene12357	FLT3	fms-related tyrosine kinase 3, transcript variant X1	yes|down	no|down	no|up	1
gene3089	LMO3	LIM domain only 3 (rhombotin-like 2), transcript variant X1	yes|up	yes|up	yes|up	3
gene7090	ZFPM2	zinc finger protein, FOG family member 2, transcript variant X1	yes|up	yes|up	no|up	2
gene5552	TTYH3	tweety family member 3, transcript variant X1	yes|down	no|down	no|up	1
gene5767	GAS2	growth arrest-specific 2, transcript variant X4	yes|down	yes|down	no|down	2
gene3669	TRAF5	TNF receptor-associated factor 5, transcript variant X1	yes|down	yes|down	no|down	2
gene3660	MRPS10	mitochondrial ribosomal protein S10	yes|down	yes|down	no|up	2
gene20219	LOC106049723	uncharacterized LOC106049723	yes|down	no|down	yes|up	2
gene639	C1QTNF7	C1q and tumor necrosis factor related protein 7, transcript variant X1	yes|up	no|up	no|down	1
gene6151	SYNJ2	synaptojanin 2, transcript variant X1	yes|up	no|down	yes|down	2
gene6150	LOC106034246	uncharacterized LOC106034246, transcript variant X1	yes|up	yes|up	no|up	2
gene14906	MN1	meningioma (disrupted in balanced translocation) 1	yes|up	yes|up	no|down	2
gene5491	CYTH3	cytohesin 3	yes|up	yes|up	no|down	2
gene2925	ITGB1BP1	integrin beta 1 binding protein 1, transcript variant X2	yes|down	yes|down	no|down	2
gene15360	LETM2	leucine zipper-EF-hand containing transmembrane protein 2, transcript variant X1	yes|up	yes|up	no|up	2
gene18926	ADAMTSL1	ADAMTS-like 1, transcript variant X1	yes|up	yes|up	no|down	2
gene18922	SKAP1	src kinase associated phosphoprotein 1	yes|down	no|down	no|up	1
gene11623	LOC106040258	vesicle-associated membrane protein 2-like	yes|up	no|up	yes|down	2
gene11193	IL10RA	interleukin 10 receptor, alpha	yes|down	yes|down	no|down	2
gene11194	TMPRSS13	transmembrane protease, serine 13	yes|down	yes|down	no|down	2
gene11195	LOC106039827	FXYD domain-containing ion transport regulator 6-like, transcript variant X1	yes|up	no|up	no|down	1
gene11456	SUSD3	sushi domain containing 3, transcript variant X1	yes|down	no|down	no|up	1
gene4012	LOC106031877	uncharacterized LOC106031877	yes|down	no|down	no|up	1
gene4014	DUSP5	dual specificity phosphatase 5	yes|down	yes|down	yes|down	3
gene11441	PTPDC1	protein tyrosine phosphatase domain containing 1, transcript variant X1	yes|up	yes|up	no|up	2
gene19081	MUC1	mucin 1, cell surface associated	yes|up	no|up	no|down	1
gene15491	LOC106044537	neurexin-3-beta, transcript variant X1	yes|up	no|up	no|down	1
gene14015	MAP1B	microtubule-associated protein 1B	yes|up	no|down	yes|down	2
gene9245	IDS	iduronate 2-sulfatase	yes|up	yes|up	no|up	2
gene10862	F3	coagulation factor III (thromboplastin, tissue factor)	yes|down	yes|down	no|down	2
gene8491	XIRP1	xin actin binding repeat containing 1	yes|up	no|up	no|down	1
gene18134	LOC106047481	proline dehydrogenase 1, mitochondrial-like	yes|down	yes|down	no|down	2
gene18133	SCARF2	scavenger receptor class F, member 2, transcript variant X1	yes|up	yes|up	no|up	2
gene11998	LOC106040745	uncharacterized LOC106040745, transcript variant X1	yes|up	yes|up	no|down	2
gene11990	TTLL11	tubulin tyrosine ligase-like family member 11, transcript variant X3	yes|up	no|up	no|down	1
gene11991	LOC106040661	carboxyl-terminal PDZ ligand of neuronal nitric oxide synthase protein-like	yes|down	no|down	no|up	1
gene19408	PAX5	paired box 5	yes|down	no|down	no|up	1
gene11994	MORN5	MORN repeat containing 5	yes|down	yes|down	no|up	2
gene17442	SLC38A10	solute carrier family 38, member 10	yes|up	yes|up	no|down	2
gene18379	LOC106047761	uncharacterized LOC106047761, transcript variant X3	yes|up	yes|up	no|up	2
gene19621	MADCAM1	mucosal vascular addressin cell adhesion molecule 1	yes|down	yes|down	no|up	2
gene19625	MIER2	mesoderm induction early response 1, family member 2, transcript variant X1	yes|down	no|down	no|up	1
gene18686	MFAP5	microfibrillar associated protein 5, transcript variant X2	yes|up	no|up	no|up	1
gene18685	AICDA	activation-induced cytidine deaminase	yes|down	yes|down	no|up	2
gene3871	AKAP6	A kinase (PRKA) anchor protein 6, transcript variant X7	yes|up	yes|up	no|down	2
gene3870	ARHGAP5	Rho GTPase activating protein 5, transcript variant X2	yes|up	no|up	no|down	1
gene3875	NPAS3	neuronal PAS domain protein 3	yes|up	yes|up	no|down	2
gene19301	PLEC	plectin	yes|up	no|down	yes|down	2
gene2726	ESRP1	epithelial splicing regulatory protein 1, transcript variant X1	yes|down	yes|down	no|down	2
gene2720	CCNE2	cyclin E2, transcript variant X1	yes|down	yes|down	no|down	2
gene3016	SGCB	sarcoglycan, beta (43kDa dystrophin-associated glycoprotein), transcript variant X1	yes|up	yes|up	no|up	2
gene6432	SSTR2	somatostatin receptor 2	yes|up	yes|up	yes|up	3
gene3013	CWH43	cell wall biogenesis 43 C-terminal homolog, transcript variant X1	yes|down	yes|down	no|down	2
gene12105	SLCO4A1	solute carrier organic anion transporter family, member 4A1	yes|down	yes|down	no|down	2
gene9726	ABCC9	ATP-binding cassette, sub-family C (CFTR/MRP), member 9	yes|up	yes|up	no|down	2
gene695	SLC34A2	solute carrier family 34 (type II sodium/phosphate cotransporter), member 2, transcript variant X1	yes|down	yes|down	no|down	2
gene7392	DEPDC1B	DEP domain containing 1B	yes|down	yes|down	no|up	2
gene7393	ELOVL7	ELOVL fatty acid elongase 7, transcript variant X2	yes|down	yes|down	no|down	2
gene15124	LAMB2	laminin, beta 2 (laminin S)	yes|up	no|up	no|down	1
gene15624	WDR92	WD repeat domain 92, transcript variant X1	yes|down	yes|down	no|down	2
gene15997	CKS2	CDC28 protein kinase regulatory subunit 2	yes|down	yes|down	no|down	2
gene15620	PLEK	pleckstrin, transcript variant X1	yes|down	yes|down	no|up	2
gene15621	CNRIP1	cannabinoid receptor interacting protein 1	yes|down	no|down	no|up	1
gene12697	LOC106041466	neuferricin	yes|up	no|up	no|down	1
gene16535	SPAG17	sperm associated antigen 17, transcript variant X1	yes|up	yes|up	no|up	2
gene16534	TBX15	T-box 15	yes|up	yes|up	no|up	2
gene12690	MIS12	MIS12 kinetochore complex component	yes|down	yes|down	no|up	2
gene12691	CAMKK1	calcium/calmodulin-dependent protein kinase kinase 1, alpha, transcript variant X4	yes|up	yes|up	no|up	2
gene17847	PLTP	phospholipid transfer protein	yes|up	no|up	no|down	1
gene16539	FAM46C	family with sequence similarity 46, member C	yes|down	no|down	no|down	1
gene12165	WEE1	WEE1 G2 checkpoint kinase, transcript variant X3	yes|down	yes|down	no|down	2
gene13349	RTTN	rotatin	yes|down	no|down	no|up	1
gene13348	CD226	CD226 molecule, transcript variant X1	yes|down	no|down	no|up	1
gene12161	LOC106040894	uncharacterized LOC106040894	yes|down	yes|down	yes|down	3
gene13343	LOC106042218	protein-glutamine gamma-glutamyltransferase 5-like	yes|down	yes|down	no|down	2
gene15194	LOC106044188	cytochrome P450 1A4-like	yes|up	yes|up	no|up	2
gene12347	GPR12	G protein-coupled receptor 12	yes|up	yes|up	no|down	2
gene3094	DERA	deoxyribose-phosphate aldolase (putative), transcript variant X1	yes|up	yes|up	no|up	2
gene20823	LOC106029694	toll-like receptor 2 type-1	yes|up	yes|up	no|down	2
gene6251	ATP10B	ATPase, class V, type 10B, transcript variant X1	yes|down	yes|down	no|down	2
gene5718	CRABP1	cellular retinoic acid binding protein 1, transcript variant X2	yes|down	no|down	no|up	1
gene5716	DNAJA4	DnaJ (Hsp40) homolog, subfamily A, member 4	yes|down	yes|down	yes|down	3
gene5713	CIB2	calcium and integrin binding family member 2, transcript variant X4	yes|down	yes|down	no|down	2
gene3673	NEK2	NIMA-related kinase 2	yes|down	yes|down	no|up	2
gene3678	DTL	denticleless E3 ubiquitin protein ligase homolog (Drosophila)	yes|down	no|down	no|up	1
gene20205	LOXL2	lysyl oxidase-like 2, transcript variant X5	yes|up	yes|up	no|down	2
gene20207	SLC25A37	solute carrier family 25 (mitochondrial iron transporter), member 37	yes|up	no|up	no|down	1
gene6163	CNTNAP5	contactin associated protein-like 5	yes|up	yes|up	no|up	2
gene6166	LOC106034313	protocadherin Fat 4-like	yes|up	yes|up	no|down	2
gene16712	LOC106045912	cytochrome P450 27C1	yes|up	no|down	yes|down	2
gene2935	RRM2	ribonucleotide reductase M2	yes|down	yes|down	no|up	2
gene7416	ADAMTS6	ADAM metallopeptidase with thrombospondin type 1 motif, 6, transcript variant X3	yes|up	yes|up	no|up	2
gene7418	CENPK	centromere protein K, transcript variant X1	yes|down	no|down	no|up	1
gene5530	GPER1	G protein-coupled estrogen receptor 1, transcript variant X1	yes|down	yes|down	no|down	2
gene7753	FAM69C	family with sequence similarity 69, member C	yes|up	yes|up	no|up	2
gene6943	MICU3	mitochondrial calcium uptake family, member 3	yes|up	yes|up	no|up	2
gene14021	DOCK8	dedicator of cytokinesis 8	yes|down	yes|down	no|up	2
gene9649	BLK	BLK proto-oncogene, Src family tyrosine kinase, transcript variant X2	yes|down	no|down	no|up	1
gene10875	CCDC18	coiled-coil domain containing 18, transcript variant X1	yes|up	yes|up	no|up	2
gene8808	SYT16	synaptotagmin XVI, transcript variant X9	yes|up	yes|up	no|up	2
gene5146	HSD11B2	hydroxysteroid (11-beta) dehydrogenase 2	yes|down	yes|down	no|down	2
gene11870	PANX3	pannexin 3, transcript variant X1	yes|down	yes|down	no|down	2
gene8482	ACAA1	acetyl-CoA acyltransferase 1	yes|up	yes|up	no|down	2
gene2876	TCF24	transcription factor 24	yes|down	yes|down	no|down	2
gene18126	POLE	polymerase (DNA directed), epsilon, catalytic subunit	yes|down	yes|down	no|up	2
gene6892	VWA8	von Willebrand factor A domain containing 8, transcript variant X1	yes|up	yes|up	no|up	2
gene17612	ARHGAP27	Rho GTPase activating protein 27	yes|down	yes|down	no|up	2
gene19433	LOC106048913	collagen alpha-1(I) chain-like, transcript variant X2	yes|down	yes|down	no|up	2
gene10450	LOC106039008	uncharacterized LOC106039008, transcript variant X1	yes|up	yes|up	no|up	2
gene19431	LOC106048914	serine/threonine-protein kinase 10-like	yes|down	no|down	no|up	1
gene11472	ATP13A2	ATPase type 13A2	yes|down	yes|down	no|up	2
gene7944	NYAP2	neuronal tyrosine-phosphorylated phosphoinositide-3-kinase adaptor 2, transcript variant X2	yes|down	yes|down	no|down	2
gene10479	LYN	LYN proto-oncogene, Src family tyrosine kinase, transcript variant X1	yes|down	no|down	no|up	1
gene17431	LOC106046714	uncharacterized LOC106046714	yes|up	yes|up	no|down	2
gene19619	CDC34	cell division cycle 34	yes|down	no|down	no|up	1
gene13153	GPR22	G protein-coupled receptor 22	yes|down	no|down	no|up	1
gene19615	FSTL3	follistatin-like 3 (secreted glycoprotein)	yes|up	no|up	no|down	1
gene19935	LOC106049425	kallikrein-8-like	yes|down	yes|down	no|up	2
gene863	B4GALT3	UDP-Gal:betaGlcNAc beta 1,4- galactosyltransferase, polypeptide 3, transcript variant X1	yes|down	no|down	no|up	1
gene18694	KLRG1	killer cell lectin-like receptor subfamily G, member 1, transcript variant X1	yes|down	yes|down	no|up	2
gene18695	LOC106048078	alpha-2-macroglobulin-like, transcript variant X1	yes|up	no|up	no|down	1
gene6760	RAB31	RAB31, member RAS oncogene family, transcript variant X1	yes|up	no|up	no|down	1
gene6762	APCDD1	adenomatosis polyposis coli down-regulated 1	yes|down	yes|down	no|down	2
gene8821	LOC106037195	uncharacterized LOC106037195	yes|down	yes|down	no|down	2
gene18698	LOC106048077	alpha-2-macroglobulin-like	yes|up	yes|up	no|down	2
gene9530	DNALI1	dynein, axonemal, light intermediate chain 1	yes|up	no|up	no|down	1
gene462	AP3M1	adaptor-related protein complex 3, mu 1 subunit	yes|down	yes|down	no|down	2
gene9821	NFATC1	nuclear factor of activated T-cells, cytoplasmic, calcineurin-dependent 1, transcript variant X1	yes|up	no|down	yes|down	2
gene9535	CDCA8	cell division cycle associated 8	yes|down	yes|down	no|up	2
gene9825	HSBP1L1	heat shock factor binding protein 1-like 1	yes|down	yes|down	no|up	2
gene9285	FRMPD3	FERM and PDZ domain containing 3, transcript variant X1	yes|down	yes|down	no|down	2
gene3842	ACTC1	actin, alpha, cardiac muscle 1	yes|up	yes|up	no|up	2
gene2739	RBM12B	RNA binding motif protein 12B	yes|down	yes|down	no|down	2
gene2738	TMEM67	transmembrane protein 67	yes|up	yes|up	no|up	2
gene2731	GEM	GTP binding protein overexpressed in skeletal muscle	yes|up	yes|up	no|up	2
gene4941	ROR1	receptor tyrosine kinase-like orphan receptor 1, transcript variant X4	yes|up	yes|up	no|down	2
gene6421	LOC106034495	chromosome unknown open reading frame, human C2orf88, transcript variant X2	yes|up	yes|up	no|up	2
gene6420	MSTN	myostatin	yes|up	no|up	no|up	1
gene13179	GRAMD4	GRAM domain containing 4, transcript variant X1	yes|up	no|up	no|down	1
gene9750	PPFIBP1	PTPRF interacting protein, binding protein 1 (liprin beta 1)	yes|up	yes|up	no|up	2
gene9752	LOC106038270	NADH-cytochrome b5 reductase 3, transcript variant X1	yes|up	no|up	no|down	1
gene685	CCDC149	coiled-coil domain containing 149, transcript variant X1	yes|up	yes|up	no|up	2
gene686	SOD3	superoxide dismutase 3, extracellular, transcript variant X2	yes|up	yes|up	no|down	2
gene687	LOC106035850	uncharacterized LOC106035850	yes|up	yes|up	no|up	2
gene9759	LOC106038249	uncharacterized LOC106038249	yes|down	yes|down	no|up	2
gene5853	PLEKHA7	pleckstrin homology domain containing, family A member 7, transcript variant X1	yes|down	yes|down	no|up	2
gene15967	XPC	xeroderma pigmentosum, complementation group C	yes|down	no|down	no|up	1
gene15968	TMEM43	transmembrane protein 43	yes|up	yes|up	no|up	2
gene16526	JSRP1	junctional sarcoplasmic reticulum protein 1	yes|up	no|up	no|down	1
gene13751	ZEB1	zinc finger E-box binding homeobox 1, transcript variant X1	yes|up	yes|up	no|up	2
gene6972	SORBS2	sorbin and SH3 domain containing 2, transcript variant X1	yes|up	yes|up	no|up	2
gene18476	CD4	CD4 molecule, transcript variant X2	yes|down	yes|down	no|up	2
gene18477	LAG3	lymphocyte-activation gene 3	yes|down	yes|down	no|down	2
gene18472	CDCA3	cell division cycle associated 3	yes|down	yes|down	no|up	2
gene3463	LOC106031264	uncharacterized LOC106031264, transcript variant X2	yes|up	yes|up	no|down	2
gene5018	ORC1	origin recognition complex, subunit 1, transcript variant X2	yes|down	no|down	no|up	1
gene5700	TLN2	talin 2, transcript variant X1	yes|up	yes|up	no|up	2
gene7568	ASCL4	achaete-scute family bHLH transcription factor 4	yes|down	yes|down	no|down	2
gene3603	TBX3	T-box 3	yes|up	yes|up	no|up	2
gene7564	BTBD11	BTB (POZ) domain containing 11, transcript variant X1	yes|up	no|up	no|down	1
gene9585	HMCES	5-hydroxymethylcytosine (hmC) binding, ES cell-specific	yes|down	no|down	no|up	1
gene3609	LOC106031475	uncharacterized LOC106031475	yes|down	no|down	no|up	1
gene16702	IGFBP2	insulin-like growth factor binding protein 2, 36kDa, transcript variant X1	yes|up	yes|up	no|up	2
gene19988	GMIP	GEM interacting protein	yes|down	yes|down	no|down	2
gene14963	DCK	deoxycytidine kinase	yes|down	yes|down	no|up	2
gene7626	LOC106035790	histone H5	yes|up	no|up	no|down	1
gene7627	GCAT	glycine C-acetyltransferase	yes|up	yes|up	no|up	2
gene15380	LOC106044418	uncharacterized LOC106044418	yes|up	yes|up	no|up	2
gene15383	UNC5D	unc-5 netrin receptor D, transcript variant X1	yes|down	no|down	no|up	1
gene14703	LOC106043688	G-protein coupled receptor 98-like	yes|down	no|down	no|up	1
gene15389	TTI2	TELO2 interacting protein 2	yes|down	yes|down	no|up	2
gene18900	ABI3	ABI family, member 3	yes|down	yes|down	no|up	2
gene7623	LOC106035938	arf-GAP with dual PH domain-containing protein 1-like	yes|down	yes|down	no|down	2
gene4035	NRAP	nebulin-related anchoring protein	yes|up	no|up	no|down	1
gene4032	TCF7L2	transcription factor 7-like 2 (T-cell specific, HMG-box)	yes|up	yes|up	no|up	2
gene14384	BCL2A1	BCL2-related protein A1	yes|down	yes|down	no|up	2
gene20638	LOC106029497	uncharacterized LOC106029497, transcript variant X1	yes|down	yes|down	no|up	2
gene20631	LOC106029493	B-cell receptor CD22-like	yes|down	no|down	no|up	1
gene20630	LOC106029492	B-cell receptor CD22-like	yes|down	yes|down	no|up	2
gene6953	FGL1	fibrinogen-like 1, transcript variant X3	yes|up	yes|up	no|up	2
gene6952	LOC106035236	uncharacterized LOC106035236	yes|up	yes|up	no|up	2
gene1287	LOC106042108	uncharacterized LOC106042108	yes|down	no|down	no|up	1
gene4152	LAMP3	lysosomal-associated membrane protein 3	yes|down	yes|down	no|up	2
gene7606	IL2RB	interleukin 2 receptor, beta, transcript variant X1	yes|down	no|down	no|up	1
gene11608	CLSTN2	calsyntenin 2	yes|up	yes|up	no|up	2
gene10808	PLCD4	phospholipase C, delta 4	yes|up	yes|up	no|up	2
gene11868	HYLS1	hydrolethalus syndrome 1	yes|down	no|down	no|up	1
gene17608	CD79B	CD79b molecule, immunoglobulin-associated beta, transcript variant X1	yes|down	yes|down	no|up	2
gene17609	LOC106046928	uncharacterized LOC106046928, transcript variant X1	yes|down	no|down	no|up	1
gene18118	LOC106047475	chromosome unknown open reading frame, human C11orf85, transcript variant X1	yes|down	yes|down	no|down	2
gene10737	MCM6	minichromosome maintenance complex component 6	yes|down	yes|down	no|up	2
gene19609	LOC106049106	uncharacterized LOC106049106	yes|down	yes|down	no|up	2
gene10735	CXCR4	chemokine (C-X-C motif) receptor 4	yes|down	yes|down	no|down	2
gene6774	CIDEA	cell death-inducing DFFA-like effector a	yes|up	no|up	no|down	1
gene9293	BTK	Bruton agammaglobulinemia tyrosine kinase	yes|down	yes|down	no|up	2
gene459	KAT6B	K(lysine) acetyltransferase 6B	yes|up	yes|up	no|up	2
gene9830	RBFA	ribosome binding factor A (putative)	yes|down	yes|down	no|down	2
gene9832	RECK	reversion-inducing-cysteine-rich protein with kazal motifs, transcript variant X1	yes|up	no|up	no|down	1
gene7822	RIPK4	receptor-interacting serine-threonine kinase 4	yes|down	yes|down	no|down	2
gene322	DNAJC12	DnaJ (Hsp40) homolog, subfamily C, member 12	yes|down	yes|down	no|down	2
gene145	WDFY4	WDFY family member 4, transcript variant X2	yes|down	yes|down	no|up	2
gene144	VSTM4	V-set and transmembrane domain containing 4	yes|down	yes|down	no|down	2
gene143	LOC106046439	chromosome unknown open reading frame, human C10orf128, transcript variant X1	yes|down	no|down	no|up	1
gene6416	ORMDL1	ORMDL sphingolipid biosynthesis regulator 1, transcript variant X1	yes|up	yes|up	no|up	2
gene16951	LOC106046139	ras-associated and pleckstrin homology domains-containing protein 1-like	yes|down	yes|down	no|up	2
gene16950	KIF21B	kinesin family member 21B	yes|down	yes|down	no|up	2
gene9740	SSPN	sarcospan	yes|up	yes|up	no|up	2
gene18954	LOC106048394	uncharacterized LOC106048394	yes|down	yes|down	no|down	2
gene10548	LOC106039127	uncharacterized LOC106039127	yes|down	yes|down	no|down	2
gene17135	PDCD1LG2	programmed cell death 1 ligand 2, transcript variant X1	yes|down	yes|down	no|down	2
gene17136	LOC106046390	programmed cell death 1 ligand 1-like, transcript variant X3	yes|down	yes|down	no|down	2
gene15605	TDRD15	tudor domain containing 15	yes|up	yes|up	no|up	2
gene15970	LOC106045060	netrin-4-like	yes|up	no|up	no|down	1
gene16559	GPR156	G protein-coupled receptor 156	yes|down	no|down	no|up	1
gene13726	LOC106042626	cytosolic 5'-nucleotidase 1A-like, transcript variant X2	yes|down	yes|down	no|up	2
gene13729	DUSP8	dual specificity phosphatase 8, transcript variant X1	yes|up	no|down	yes|down	2
gene4226	TNFRSF13B	tumor necrosis factor receptor superfamily, member 13B	yes|down	no|down	no|up	1
gene18485	LOC106047829	protein Wnt-4-like	yes|down	no|down	no|up	1
gene18484	ACRBP	acrosin binding protein	yes|down	no|down	no|up	1
gene18486	LPAR5	lysophosphatidic acid receptor 5, transcript variant X4	yes|down	yes|down	no|up	2
gene12417	LOC106041222	lipopolysaccharide-induced tumor necrosis factor-alpha factor homolog	yes|down	yes|down	no|down	2
gene2078	SIX2	SIX homeobox 2	yes|up	yes|up	no|up	2
gene3076	PLEKHA5	pleckstrin homology domain containing, family A member 5, transcript variant X1	yes|up	no|up	no|down	1
gene2074	LOC106029795	uncharacterized LOC106029795, transcript variant X1	yes|down	no|down	yes|up	2
gene2076	SRBD1	S1 RNA binding domain 1, transcript variant X2	yes|up	yes|up	no|up	2
gene11757	SLC44A1	solute carrier family 44 (choline transporter), member 1	yes|up	no|up	no|down	1
gene1504	CAT	catalase	yes|up	yes|up	yes|up	3
gene3476	SERPIND1	serpin peptidase inhibitor, clade D (heparin cofactor), member 1, transcript variant X2	yes|up	yes|up	no|down	2
gene5867	PTPRF	protein tyrosine phosphatase, receptor type, F, transcript variant X1	yes|down	yes|down	no|down	2
gene5730	NRG4	neuregulin 4, transcript variant X6	yes|down	no|down	no|down	1
gene5731	SLC43A3	solute carrier family 43, member 3, transcript variant X1	yes|up	yes|up	no|up	2
gene3617	PLEKHH2	pleckstrin homology domain containing, family H (with MyTH4 domain) member 2, transcript variant X2	yes|up	yes|up	no|down	2
gene14555	LOC106043564	uncharacterized LOC106043564	yes|down	no|down	no|up	1
gene7598	NCF4	neutrophil cytosolic factor 4, 40kDa	yes|down	yes|down	no|up	2
gene20461	ADRBK1	adrenergic, beta, receptor kinase 1	yes|down	yes|down	no|down	2
gene19992	LOC106049484	uncharacterized LOC106049484	yes|down	yes|down	no|down	2
gene6185	MZB1	marginal zone B and B1 cell-specific protein	yes|down	no|down	no|up	1
gene6186	SLC23A1	solute carrier family 23 (ascorbic acid transporter), member 1	yes|down	yes|down	no|up	2
gene6189	LOC106034340	uncharacterized LOC106034340	yes|down	yes|down	no|up	2
gene14952	NUP54	nucleoporin 54kDa	yes|down	yes|down	no|down	2
gene14957	JCHAIN	joining chain of multimeric IgA and IgM	yes|down	no|down	no|down	1
gene20089	DDIT3	DNA-damage-inducible transcript 3	yes|down	yes|down	no|down	2
gene20087	ARHGAP9	Rho GTPase activating protein 9	yes|down	yes|down	no|up	2
gene3296	ACAD10	acyl-CoA dehydrogenase family, member 10, transcript variant X1	yes|down	no|down	no|up	1
gene3295	ALDH2	aldehyde dehydrogenase 2 family (mitochondrial)	yes|up	yes|up	no|up	2
gene95	CEP55	centrosomal protein 55kDa	yes|down	yes|down	no|up	2
gene9980	ZHX2	zinc fingers and homeoboxes 2	yes|up	no|up	no|down	1
gene5513	LOC106033525	uncharacterized LOC106033525	yes|up	no|up	no|down	1
gene4029	ACSL5	acyl-CoA synthetase long-chain family member 5, transcript variant X1	yes|down	yes|down	no|up	2
gene2882	MYBL1	v-myb avian myeloblastosis viral oncogene homolog-like 1, transcript variant X1	yes|down	yes|down	no|up	2
gene20401	LOC106049915	Ig mu heavy chain disease protein-like	yes|down	no|down	no|down	1
gene20407	LOC106049920	uncharacterized LOC106049920	yes|down	yes|down	no|down	2
gene20405	LOC106049922	HLA class II histocompatibility antigen, DR alpha chain	yes|down	yes|down	no|down	2
gene6965	MTNR1A	melatonin receptor 1A, transcript variant X1	yes|down	yes|down	no|up	2
gene6969	LOC106035235	cytochrome P450 4V2	yes|up	yes|up	no|up	2
gene4127	LOC106032022	calcium-activated potassium channel subunit beta-2, transcript variant X2	yes|up	no|up	no|down	1
gene7610	RAC2	ras-related C3 botulinum toxin substrate 2 (rho family, small GTP binding protein Rac2)	yes|down	yes|down	no|up	2
gene14041	LOC106043005	uncharacterized LOC106043005	yes|down	yes|down	no|up	2
gene7614	MFNG	MFNG O-fucosylpeptide 3-beta-N-acetylglucosaminyltransferase, transcript variant X1	yes|down	yes|down	no|up	2
gene7619	SH3BP1	SH3-domain binding protein 1	yes|down	yes|down	no|up	2
gene8648	CCT8	chaperonin containing TCP1, subunit 8 (theta)	yes|down	yes|down	no|down	2
gene11676	LOC106040353	phospholipid-transporting ATPase IB-like	yes|down	yes|down	no|down	2
gene3537	LOC106031329	melanotransferrin-like, transcript variant X3	yes|up	yes|up	no|up	2
gene4828	CNOT6	CCR4-NOT transcription complex, subunit 6, transcript variant X1	yes|down	no|down	no|up	1
gene9199	SOWAHD	sosondowah ankyrin repeat domain family member D	yes|down	yes|down	no|up	2
gene13482	KCNE3	potassium channel, voltage gated subfamily E regulatory beta subunit 3	yes|down	yes|down	no|down	2
gene18107	ALPK3	alpha-kinase 3	yes|up	yes|up	no|up	2
gene19459	IRF5	interferon regulatory factor 5	yes|down	yes|down	no|down	2
gene19454	ADD2	adducin 2 (beta)	yes|up	no|up	no|down	1
gene11494	LOC106040155	neuroblastoma suppressor of tumorigenicity 1	yes|up	no|up	no|down	1
gene18007	CDC14B	cell division cycle 14B, transcript variant X1	yes|up	no|up	no|down	1
gene10720	OPA1	optic atrophy 1 (autosomal dominant)	yes|up	yes|up	no|up	2
gene19677	CNTNAP4	contactin associated protein-like 4, transcript variant X1	yes|down	yes|down	no|down	2
gene10723	HRASLS	HRAS-like suppressor, transcript variant X1	yes|up	yes|up	no|up	2
gene19671	WNT4	wingless-type MMTV integration site family, member 4	yes|down	yes|down	no|down	2
gene9996	NOV	nephroblastoma overexpressed	yes|up	no|up	no|down	1
gene9997	MAL2	mal, T-cell differentiation protein 2	yes|down	yes|down	no|up	2
gene848	PLA1A	phospholipase A1 member A, transcript variant X1	yes|up	no|up	no|down	1
gene6749	PTPRM	protein tyrosine phosphatase, receptor type, M, transcript variant X1	yes|up	yes|up	no|up	2
gene17040	LOC106046277	potassium voltage-gated channel subfamily A member 5-like	yes|up	no|up	no|down	1
gene5290	ADAMTS18	ADAM metallopeptidase with thrombospondin type 1 motif, 18, transcript variant X1	yes|up	yes|up	no|up	2
gene4837	LOC106032815	leukotriene C4 synthase-like	yes|down	no|down	no|up	1
gene4834	LOC106032894	leukotriene C4 synthase-like, transcript variant X4	yes|down	no|down	no|up	1
gene8358	LMCD1	LIM and cysteine-rich domains 1	yes|up	no|up	no|down	1
gene4833	LOC106032673	deoxycytidine kinase-like	yes|down	yes|down	no|up	2
gene4830	ADAMTS2	ADAM metallopeptidase with thrombospondin type 1 motif, 2, transcript variant X2	yes|up	yes|up	no|up	2
gene440	DLG5	discs, large homolog 5 (Drosophila), transcript variant X1	yes|up	yes|up	no|up	2
gene3829	ARHGAP11A	Rho GTPase activating protein 11A, transcript variant X1	yes|down	yes|down	no|up	2
gene9518	LOC106037961	uncharacterized LOC106037961	yes|up	yes|up	no|no test	2
gene157	ANXA8L1	annexin A8-like 1, transcript variant X5	yes|down	yes|down	no|up	2
gene158	LOC106048153	neuropeptide Y receptor type 4-like	yes|up	yes|up	no|up	2
gene7471	SLC9A7	solute carrier family 9, subfamily A (NHE7, cation proton antiporter 7), member 7, transcript variant X1	yes|down	yes|down	no|up	2
gene6400	LOC106034543	uncharacterized LOC106034543	yes|up	yes|up	no|down	2
gene1752	GNS	glucosamine (N-acetyl)-6-sulfatase	yes|up	no|up	no|down	1
gene1753	LOC106045444		yes|down	yes|down	no|down	2
gene9778	PRR5	proline rich 5 (renal), transcript variant X2	yes|down	no|down	no|down	1
gene14223	LOC106043205	disintegrin and metalloproteinase domain-containing protein 33-like	yes|down	yes|down	no|up	2
gene15312	SFRP4	secreted frizzled-related protein 4	yes|up	no|up	no|down	1
gene16946	LOC106046136	serine/threonine-protein kinase pim-1-like	yes|down	yes|down	yes|down	3
gene15313	EPDR1	ependymin related 1	yes|up	yes|up	no|down	2
gene17145	LOC106046397	guanylate-binding protein 3-like	yes|down	yes|down	no|down	2
gene17411	CLGN	calmegin, transcript variant X3	yes|down	yes|down	no|up	2
gene16949	CACNA1S	calcium channel, voltage-dependent, L type, alpha 1S subunit	yes|down	no|down	no|up	1
gene15946	EPB41L4B	erythrocyte membrane protein band 4.1 like 4B	yes|down	yes|down	no|down	2
gene12643	RFFL	ring finger and FYVE-like domain containing E3 ubiquitin protein ligase, transcript variant X1	yes|down	yes|down	no|down	2
gene15944	PTPN3	protein tyrosine phosphatase, non-receptor type 3, transcript variant X2	yes|up	no|up	no|down	1
gene15943	MOCOS	molybdenum cofactor sulfurase, transcript variant X1	yes|up	yes|up	no|up	2
gene16548	CTC1	CTS telomere maintenance complex component 1, transcript variant X1	yes|down	yes|down	no|down	2
gene12646	LOC106041493	schlafen family member 13-like, transcript variant X4	yes|down	yes|down	no|down	2
gene16540	DUSP12	dual specificity phosphatase 12	yes|down	no|down	no|up	1
gene17890	CEP104	centrosomal protein 104kDa, transcript variant X2	yes|up	yes|up	no|down	2
gene12192	PDE3B	phosphodiesterase 3B, cGMP-inhibited	yes|down	yes|down	no|down	2
gene18493	NCAPD2	non-SMC condensin I complex, subunit D2	yes|down	no|down	no|up	1
gene12394	STARD13	StAR-related lipid transfer (START) domain containing 13, transcript variant X1	yes|up	no|up	no|down	1
gene12391	N4BP2L2	NEDD4 binding protein 2-like 2	yes|up	yes|up	no|up	2
gene3044	PPAT	phosphoribosyl pyrophosphate amidotransferase, transcript variant X1	yes|down	no|down	no|up	1
gene2066	LOC106029788	uncharacterized LOC106029788	yes|down	no|down	no|up	1
gene1574	LOC106045879	uncharacterized LOC106045879	yes|up	yes|up	no|up	2
gene1575	LOC106045840	histone H2A.J	yes|up	yes|up	no|down	2
gene1570	LOC106045851	histone H2B 8	yes|up	no|up	no|down	1
gene1571	LOC106045128	uncharacterized LOC106045128	yes|up	yes|up	no|up	2
gene5872	CDC20	cell division cycle 20	yes|down	yes|down	no|up	2
gene5721	HYKK	hydroxylysine kinase	yes|up	yes|up	no|up	2
gene496	LOC106033965	T-cell surface glycoprotein CD8 beta chain-like	yes|down	yes|down	no|up	2
gene14545	PPM1L	protein phosphatase, Mg2+/Mn2+ dependent, 1L, transcript variant X1	yes|up	no|up	no|down	1
gene12069	RGS19	regulator of G-protein signaling 19	yes|down	yes|down	no|up	2
gene7585	MCM5	minichromosome maintenance complex component 5	yes|down	no|down	no|up	1
gene12063	UCKL1	uridine-cytidine kinase 1-like 1	yes|down	yes|down	no|up	2
gene14944	LOC106043950	16 kDa beta-galactoside-binding lectin	yes|up	yes|up	no|up	2
gene14947	LOC106043945	uncharacterized LOC106043945, transcript variant X1	yes|down	yes|down	no|up	2
gene15495	TSHR	thyroid stimulating hormone receptor	yes|up	no|up	no|down	1
gene14948	STBD1	starch binding domain 1	yes|up	no|down	yes|down	2
gene4585	FAM26F	family with sequence similarity 26, member F	yes|down	no|down	no|up	1
gene4580	CITED2	Cbp/p300-interacting transactivator, with Glu/Asp-rich carboxy-terminal domain, 2	yes|up	yes|up	yes|up	3
gene1858	PCNXL2	pecanex-like 2 (Drosophila), transcript variant X1	yes|down	no|down	no|up	1
gene86	KIF11	kinesin family member 11, transcript variant X1	yes|down	yes|down	no|up	2
gene5505	BAIAP2L1	BAI1-associated protein 2-like 1	yes|up	yes|up	yes|up	3
gene4055	LOC106031936	pancreatic lipase-related protein 2-like	yes|down	yes|down	no|down	2
gene9339	REPS2	RALBP1 associated Eps domain containing 2	yes|up	yes|up	no|up	2
gene4052	ATRNL1	attractin-like 1, transcript variant X1	yes|up	yes|up	no|down	2
gene15230	TAGAP	T-cell activation RhoGTPase activating protein	yes|down	yes|down	no|up	2
gene1991	LRRC73	leucine rich repeat containing 73	yes|down	yes|down	no|down	2
gene1996	POLH	polymerase (DNA directed), eta	yes|down	yes|down	no|up	2
gene20438	VCPKMT	valosin containing protein lysine (K) methyltransferase	yes|down	yes|down	no|down	2
gene20618	CENPL	centromere protein L	yes|down	yes|down	no|up	2
gene14056	LOC106042997	uncharacterized LOC106042997, transcript variant X1	yes|down	yes|down	no|down	2
gene14055	GPR174	G protein-coupled receptor 174	yes|down	yes|down	no|up	2
gene14052	LPAR4	lysophosphatidic acid receptor 4	yes|up	yes|up	no|up	2
gene14053	LOC106042993	putative P2Y purinoceptor 10	yes|down	yes|down	no|up	2
gene14058	TBX22	T-box 22	yes|up	no|up	no|down	1
gene8109	LOC106036462	uncharacterized LOC106036462, transcript variant X1	yes|up	yes|up	no|down	2
gene11669	INPP5D	inositol polyphosphate-5-phosphatase, 145kDa	yes|down	yes|down	no|down	2
gene10289	LTBP2	latent transforming growth factor beta binding protein 2, transcript variant X1	yes|up	no|down	no|down	1
gene10829	VCAM1	vascular cell adhesion molecule 1, transcript variant X1	yes|down	yes|down	no|down	2
gene11805	IL17REL	interleukin 17 receptor E-like, transcript variant X1	yes|down	yes|down	no|up	2
gene9181	BCORL1	BCL6 corepressor-like 1	yes|down	yes|down	no|down	2
gene17626	PLCD3	phospholipase C, delta 3	yes|up	no|up	no|down	1
gene17620	MYO1D	myosin ID	yes|up	yes|up	no|up	2
gene17622	FMNL1	formin-like 1	yes|down	yes|down	no|down	2
gene19449	MAT2A	methionine adenosyltransferase II, alpha	yes|down	yes|down	no|down	2
gene19445	NPC1L1	NPC1-like 1	yes|down	yes|down	no|down	2
gene14581	PLCH1	phospholipase C, eta 1	yes|down	yes|down	no|up	2
gene8589	GAS2L3	growth arrest-specific 2 like 3, transcript variant X5	yes|down	yes|down	no|down	2
gene10750	NCKAP5	NCK-associated protein 5, transcript variant X4	yes|up	yes|up	yes|up	3
gene9987	MTBP	MDM2 binding protein	yes|down	no|down	no|up	1
gene18397	MIS18BP1	MIS18 binding protein 1	yes|down	yes|down	no|down	2
gene18392	E2F1	E2F transcription factor 1	yes|down	yes|down	no|up	2
gene4829	LOC106032902	uncharacterized LOC106032902	yes|up	yes|up	no|up	2
gene9507	LOC106037928	protein argonaute-4	yes|down	yes|down	no|down	2
gene8089	TICRR	TOPBP1-interacting checkpoint and replication regulator	yes|down	no|down	no|up	1
gene7808	SLC37A1	solute carrier family 37 (glucose-6-phosphate transporter), member 1, transcript variant X5	yes|down	yes|down	no|down	2
gene302	SRGN	serglycin	yes|down	yes|down	no|down	2
gene165	45359	membrane-associated ring finger (C3HC4) 8, E3 ubiquitin protein ligase, transcript variant X2	yes|down	yes|down	no|down	2
gene2270	LOC106030024	uncharacterized LOC106030024	yes|up	yes|up	no|down	2
gene9764	SCUBE1	signal peptide, CUB domain, EGF-like 1, transcript variant X1	yes|up	yes|up	no|up	2
gene13120	KIF14	kinesin family member 14, transcript variant X1	yes|down	yes|down	no|up	2
gene13125	NR5A2	nuclear receptor subfamily 5, group A, member 2	yes|up	no|up	no|down	1
gene16970	MCM10	minichromosome maintenance complex component 10, transcript variant X1	yes|down	yes|down	no|up	2
gene17406	TBC1D9	TBC1 domain family, member 9 (with GRAM domain), transcript variant X1	yes|down	yes|down	no|down	2
gene13709	CD81	CD81 molecule	yes|up	no|up	no|down	1
gene16574	DOC2B	double C2-like domains, beta	yes|down	no|down	no|up	1
gene16579	GEMIN4	gem (nuclear organelle) associated protein 4	yes|down	yes|down	no|down	2
gene16578	FAM57A	family with sequence similarity 57, member A	yes|up	yes|up	no|up	2
gene11944	SCN3B	sodium channel, voltage gated, type III beta subunit	yes|up	no|up	no|down	1
gene3052	DUSP16	dual specificity phosphatase 16	yes|up	yes|up	no|down	2
gene7021	LOC106035225	uncharacterized LOC106035225, transcript variant X1	yes|down	no|no test	no|up	1
gene6211	LCP2	lymphocyte cytosolic protein 2 (SH2 domain containing leukocyte protein of 76kDa)	yes|down	yes|down	no|down	2
gene6212	LOC106034330	chromosome unknown open reading frame, human C5orf58, transcript variant X2	yes|down	yes|down	no|down	2
gene16286	SAMHD1	SAM domain and HD domain 1, transcript variant X1	yes|down	yes|down	no|down	2
gene16281	SLA2	Src-like-adaptor 2	yes|down	no|down	no|up	1
gene6215	FOXI1	forkhead box I1, transcript variant X1	yes|down	yes|down	no|down	2
gene6216	DOCK2	dedicator of cytokinesis 2	yes|down	yes|down	no|up	2
gene6218	SPDL1	spindle apparatus coiled-coil protein 1, transcript variant X4	yes|down	no|down	no|up	1
gene3455	CDC45	cell division cycle 45	yes|down	yes|down	no|up	2
gene1566	LOC106045814	histone H2B 7-like	yes|up	yes|up	no|up	2
gene1565	LOC106045810	histone H1.10	yes|up	yes|up	no|down	2
gene1562	SMCO3	single-pass membrane protein with coiled-coil domains 3, transcript variant X1	yes|up	no|up	no|down	1
gene1560	ART4	ADP-ribosyltransferase 4 (Dombrock blood group)	yes|up	yes|up	no|down	2
gene2185	STK39	serine threonine kinase 39, transcript variant X1	yes|down	yes|down	no|up	2
gene1569	LOC106045823	histone H2A-like	yes|up	yes|up	no|up	2
gene3637	HAAO	3-hydroxyanthranilate 3,4-dioxygenase	yes|down	no|down	no|up	1
gene16758	MRC2	mannose receptor, C type 2	yes|up	yes|up	no|down	2
gene16021	LOC106045119	transcription factor E2F2-like	yes|down	yes|down	no|down	2
gene1215	FAM65C	family with sequence similarity 65, member C, transcript variant X2	yes|up	yes|up	no|up	2
gene16026	LOC106045147	uncharacterized LOC106045147	yes|down	no|down	no|up	1
gene12897	LOC106041693	protein Jumonji-like	yes|up	yes|up	no|down	2
gene12381	HSPH1	heat shock 105kDa/110kDa protein 1	yes|down	yes|down	yes|down	3
gene12386	FRY	furry homolog (Drosophila), transcript variant X1	yes|up	yes|up	no|up	2
gene14283	CCDC169	coiled-coil domain containing 169, transcript variant X1	yes|up	yes|up	no|down	2
gene14280	DCLK1	doublecortin-like kinase 1, transcript variant X2	yes|up	no|up	no|down	1
gene355	FAM13C	family with sequence similarity 13, member C, transcript variant X2	yes|up	no|up	no|down	1
gene6031	MAML2	mastermind-like 2 (Drosophila)	yes|up	yes|up	no|up	2
gene6036	SESN3	sestrin 3, transcript variant X1	yes|up	yes|up	no|up	2
gene4045	ABLIM1	actin binding LIM protein 1, transcript variant X1	yes|up	yes|up	no|up	2
gene2867	LOC106030608	chromosome unknown open reading frame, human C8orf34, transcript variant X1	yes|up	yes|up	no|up	2
gene4042	TDRD1	tudor domain containing 1	yes|up	yes|up	no|up	2
gene2864	SULF1	sulfatase 1	yes|up	yes|up	no|up	2
gene15226	DYNLT1	dynein, light chain, Tctex-type 1	yes|down	yes|down	no|up	2
gene1982	LTBP1	latent transforming growth factor beta binding protein 1, transcript variant X1	yes|up	yes|up	no|down	2
gene4107	TNFSF10	tumor necrosis factor (ligand) superfamily, member 10, transcript variant X1	yes|up	yes|up	no|up	2
gene8117	LOC106036455	A-kinase anchor protein 13-like	yes|up	no|up	no|down	1
gene14064	LOC106042955	non-histone chromosomal protein HMG-14A-like	yes|down	yes|down	no|up	2
gene11125	POU2F3	POU class 2 homeobox 3, transcript variant X2	yes|down	yes|down	no|down	2
gene11124	LOC106039709	transmembrane protein 136-like	yes|down	yes|down	no|up	2
gene11128	TRIM29	tripartite motif containing 29, transcript variant X1	yes|down	yes|down	no|down	2
gene11832	ANOS1	anosmin 1, transcript variant X1	yes|up	yes|up	yes|up	3
gene10839	LOC106039479	hornerin-like, transcript variant X3	yes|down	yes|down	no|down	2
gene1361	LOC106043002		yes|down	yes|down	no|down	2
gene1364	LOC106040722	cytosolic phospholipase A2 epsilon-like	yes|down	yes|down	no|down	2
gene1366	SPTBN5	spectrin, beta, non-erythrocytic 5	yes|up	yes|up	no|up	2
gene10747	ACMSD	aminocarboxymuconate semialdehyde decarboxylase, transcript variant X1	yes|down	yes|down	no|up	2
gene9972	WDYHV1	WDYHV motif containing 1	yes|down	yes|down	no|down	2
gene9975	LOC106038471	uncharacterized LOC106038471	yes|down	yes|down	no|up	2
gene828	GPR65	G protein-coupled receptor 65, transcript variant X3	yes|down	yes|down	no|down	2
gene18388	TOX2	TOX high mobility group box family member 2	yes|down	no|down	no|up	1
gene18380	SOGA1	suppressor of glucose, autophagy associated 1	yes|up	no|up	no|down	1
gene5880	PIF1	PIF1 5'-to-3' DNA helicase	yes|down	yes|down	no|up	2
gene9578	COL7A1	collagen, type VII, alpha 1	yes|down	yes|down	no|down	2
gene3800	ARG2	arginase 2	yes|down	yes|down	no|down	2
gene9571	ABHD6	abhydrolase domain containing 6, transcript variant X2	yes|up	yes|up	no|up	2
gene9572	DNASE1L3	deoxyribonuclease I-like 3, transcript variant X2	yes|down	yes|down	no|up	2
gene4853	ARSI	arylsulfatase family, member I	yes|up	yes|up	no|up	2
gene7810	UBASH3A	ubiquitin associated and SH3 domain containing A	yes|down	yes|down	no|up	2
gene174	LOC106049699	uncharacterized LOC106049699, transcript variant X1	yes|up	yes|up	no|down	2
gene9790	FBLN1	fibulin 1, transcript variant X1	yes|up	yes|up	no|down	2
gene9799	LOC106038239	uncharacterized LOC106038239	yes|up	yes|up	no|up	2
gene16964	FRMD4A	FERM domain containing 4A	yes|up	yes|up	no|down	2
gene13131	PTPRC	protein tyrosine phosphatase, receptor type, C, transcript variant X1	yes|down	yes|down	no|down	2
gene16565	SMG8	SMG8 nonsense mediated mRNA decay factor	yes|down	yes|down	no|down	2
gene9111	COLEC12	collectin sub-family member 12	yes|up	no|up	no|down	1
gene13243	LHFPL2	lipoma HMGIC fusion partner-like 2, transcript variant X4	yes|up	no|up	no|down	1
gene13716	LOC106042622	uncharacterized LOC106042622, transcript variant X1	yes|up	yes|up	no|up	2
gene18521	ZDHHC18	zinc finger, DHHC-type containing 18, transcript variant X1	yes|down	yes|down	no|down	2
gene13244	LOC106042091		yes|up	yes|up	no|down	2
gene6673	DSP	desmoplakin, transcript variant X1	yes|down	yes|down	no|down	2
gene13398	BUB1	BUB1 mitotic checkpoint serine/threonine kinase	yes|down	yes|down	no|up	2
gene19697	HIC1	hypermethylated in cancer 1	yes|up	no|up	no|down	1
gene19161	IL11RA	interleukin 11 receptor, alpha, transcript variant X1	yes|up	yes|up	no|up	2
gene2265	HOXD10	homeobox D10	yes|down	yes|down	no|down	2
gene5095	MUTYH	mutY DNA glycosylase	yes|down	yes|down	no|down	2
gene19163	LOC106048600	C-C motif chemokine 26-like	yes|down	yes|down	no|up	2
gene8077	LOC106036315	killer cell lectin-like receptor subfamily B member 1B allele B	yes|down	no|down	no|up	1
gene3024	LNX1	ligand of numb-protein X 1, E3 ubiquitin protein ligase, transcript variant X1	yes|down	yes|down	no|up	2
gene3021	RASL11B	RAS-like, family 11, member B	yes|down	yes|down	no|up	2
gene7036	MATN2	matrilin 2, transcript variant X1	yes|up	yes|up	no|up	2
gene7034	LAPTM4B	lysosomal protein transmembrane 4 beta, transcript variant X2	yes|down	yes|down	no|down	2
gene2519	RARB	retinoic acid receptor, beta, transcript variant X6	yes|up	yes|up	no|up	2
gene16296	LOC106045440	uncharacterized LOC106045440, transcript variant X2	yes|down	yes|down	no|down	2
gene1558	MGP	matrix Gla protein	yes|up	no|up	no|down	1
gene16291	GGT7	gamma-glutamyltransferase 7, transcript variant X1	yes|up	yes|up	no|up	2
gene1553	LOC106045089	uncharacterized LOC106045089	yes|up	yes|up	no|down	2
gene16298	EPB41L1	erythrocyte membrane protein band 4.1-like 1, transcript variant X1	yes|up	yes|up	no|up	2
gene15921	FBN3	fibrillin 3, transcript variant X4	yes|down	yes|down	no|up	2
gene2190	SPC25	SPC25, NDC80 kinetochore complex component	yes|down	yes|down	no|up	2
gene1625	CENPM	centromere protein M	yes|down	no|down	no|up	1
gene15037	LOC106044035	uncharacterized LOC106044035	yes|down	yes|down	no|down	2
gene15033	GCH1	GTP cyclohydrolase 1	yes|down	yes|down	yes|down	3
gene16746	LIMD2	LIM domain containing 2, transcript variant X1	yes|down	yes|down	no|up	2
gene16031	TMEM200B	transmembrane protein 200B, transcript variant X1	yes|up	no|up	no|down	1
gene12443	LOC106041217	uncharacterized LOC106041217	yes|up	yes|up	no|down	2
gene12442	SOCS1	suppressor of cytokine signaling 1	yes|down	yes|down	no|down	2
gene12913	NEIL3	nei-like DNA glycosylase 3, transcript variant X1	yes|down	yes|down	no|down	2
gene12444	LOC106041177	uncharacterized LOC106041177	yes|up	yes|up	no|down	2
gene7258	LOC106035463	pentafunctional AROM polypeptide-like	yes|down	yes|down	no|up	2
gene7251	TMF1	TATA element modulatory factor 1	yes|up	no|up	no|down	1
gene7257	LOC106035461	uncharacterized LOC106035461, transcript variant X1	yes|down	yes|down	no|up	2
gene6021	TRPC6	transient receptor potential cation channel, subfamily C, member 6	yes|up	yes|up	no|up	2
gene4077	GOLIM4	golgi integral membrane protein 4, transcript variant X1	yes|up	yes|up	no|down	2
gene4075	LOC106031971	uncharacterized LOC106031971, transcript variant X5	yes|up	no|down	no|down	1
gene2855	EYA1	EYA transcriptional coactivator and phosphatase 1, transcript variant X3	yes|up	no|up	no|down	1
gene15210	CD276	CD276 molecule	yes|up	no|up	no|down	1
gene4114	NAALADL2	N-acetylated alpha-linked acidic dipeptidase-like 2, transcript variant X1	yes|up	yes|up	no|down	2
gene4110	ECT2	epithelial cell transforming 2, transcript variant X1	yes|down	yes|down	no|up	2
gene14075	LOC106042970	connector enhancer of kinase suppressor of ras 2-like, transcript variant X1	yes|down	yes|down	no|up	2
gene8167	LOC106036486	uncharacterized LOC106036486, transcript variant X2	yes|up	yes|up	no|up	2
gene15485	SLC13A1	solute carrier family 13 (sodium/sulfate symporter), member 1, transcript variant X1	yes|up	no|up	no|down	1
gene11647	HS6ST1	heparan sulfate 6-O-sulfotransferase 1, transcript variant X1	yes|up	no|up	no|down	1
gene11135	C1QTNF5	C1q and tumor necrosis factor related protein 5	yes|up	yes|up	no|up	2
gene11139	PDZD3	PDZ domain containing 3	yes|down	yes|down	no|down	2
gene19394	LRRC4	leucine rich repeat containing 4	yes|down	yes|down	no|down	2
gene11359	HSPD1	heat shock 60kDa protein 1 (chaperonin)	yes|down	yes|down	no|down	2
gene10513	TTPA	tocopherol (alpha) transfer protein, transcript variant X1	yes|up	yes|up	no|up	2
gene19390	DOCK5	dedicator of cytokinesis 5, transcript variant X1	yes|up	no|up	no|down	1
gene10519	LOC106039057	25-hydroxycholesterol 7-alpha-hydroxylase	yes|down	yes|down	no|up	2
gene8380	BHLHE40	basic helix-loop-helix family, member e40	yes|up	no|down	yes|down	2
gene5305	CENPN	centromere protein N, transcript variant X1	yes|down	yes|down	no|down	2
gene7793	SIK1	salt-inducible kinase 1, transcript variant X1	yes|up	yes|up	no|down	2
gene3557	LOC106031353	dynein light chain 1, cytoplasmic-like	yes|down	no|down	no|up	1
gene10990	NETO2	neuropilin (NRP) and tolloid (TLL)-like 2	yes|up	yes|up	no|down	2
gene10996	MYLK3	myosin light chain kinase 3, transcript variant X6	yes|down	yes|down	yes|down	3
gene5244	LOC106033226	uncharacterized LOC106033226, transcript variant X1	yes|up	no|up	no|down	1
gene3818	THBS1	thrombospondin 1	yes|up	no|down	yes|down	2
gene4849	PDGFRB	platelet-derived growth factor receptor, beta polypeptide, transcript variant X1	yes|up	yes|up	no|down	2
gene3817	FSIP1	fibrous sheath interacting protein 1, transcript variant X3	yes|up	yes|up	no|up	2
gene8304	XPO1	exportin 1, transcript variant X2	yes|down	yes|down	no|down	2
gene14442	RCAN1	regulator of calcineurin 1, transcript variant X1	yes|down	yes|down	yes|down	3
gene8300	LOC106036638	leucine-rich repeat neuronal protein 4-like	yes|up	yes|up	no|down	2
gene9781	PHF21B	PHD finger protein 21B, transcript variant X1	yes|up	yes|up	no|up	2
gene17170	F10	coagulation factor X	yes|down	yes|down	yes|down	3
gene18732	CRACR2A	calcium release activated channel regulator 2A, transcript variant X6	yes|down	yes|down	no|down	2
gene18731	PRMT8	protein arginine methyltransferase 8, transcript variant X1	yes|down	yes|down	no|up	2
gene19132	LOC106048580	hemoglobin subunit beta	yes|up	yes|up	no|down	2
gene10772	MARCO	macrophage receptor with collagenous structure, transcript variant X1	yes|down	yes|down	no|down	2
gene19640	LOC106049127	protein S100-A8-like, transcript variant X2	yes|down	no|down	no|down	1
gene10774	LOC106039365	chromosome unknown open reading frame, human C2orf76, transcript variant X2	yes|down	no|down	no|up	1
gene18515	RPS6KA1	ribosomal protein S6 kinase, 90kDa, polypeptide 1, transcript variant X1	yes|down	yes|down	no|up	2
gene582	SORCS2	sortilin-related VPS10 domain containing receptor 2, transcript variant X2	yes|up	yes|up	no|up	2
gene581	AFAP1	actin filament associated protein 1, transcript variant X1	yes|up	yes|up	no|up	2
gene9868	LOC106038377	C-C chemokine receptor type 8-like, transcript variant X2	yes|down	no|down	no|up	1
gene2218	LOC106029992	cytochrome b reductase 1	yes|up	no|up	no|down	1
gene9869	LOC106038356	C-C chemokine receptor type 5-like, transcript variant X1	yes|down	yes|down	no|up	2
gene5934	MCOLN2	mucolipin 2, transcript variant X2	yes|down	yes|down	no|up	2
gene2032	KCNK17	potassium channel, two pore domain subfamily K, member 17	yes|down	yes|down	no|up	2
gene6237	HMMR	hyaluronan-mediated motility receptor (RHAMM), transcript variant X2	yes|down	yes|down	no|down	2
gene1541	LOC106044856	fatty acid desaturase 1-like, transcript variant X1	yes|down	yes|down	no|up	2
gene15939	LOC106045020	poly(rC)-binding protein 3-like, transcript variant X1	yes|up	yes|up	no|up	2
gene15025	LOC106044028	uncharacterized LOC106044028	yes|up	no|up	no|down	1
gene12051	HELZ2	helicase with zinc finger 2, transcriptional coactivator, transcript variant X1	yes|down	yes|down	no|down	2
gene16004	SYK	spleen tyrosine kinase	yes|down	yes|down	no|down	2
gene16003	DIRAS2	DIRAS family, GTP-binding RAS-like 2, transcript variant X2	yes|down	yes|down	no|up	2
gene13507	SERPINH1	serpin peptidase inhibitor, clade H (heat shock protein 47), member 1, (collagen binding protein 1)	yes|down	yes|down	no|down	2
gene12909	NUP153	nucleoporin 153kDa	yes|down	yes|down	no|down	2
gene12454	MKL2	MKL/myocardin-like 2, transcript variant X1	yes|up	yes|up	no|up	2
gene12906	CAP2	CAP, adenylate cyclase-associated protein, 2 (yeast)	yes|up	yes|up	no|up	2
gene12904	RBM24	RNA binding motif protein 24	yes|down	no|down	no|up	1
gene56	DNMBP	dynamin binding protein	yes|up	yes|up	no|up	2
gene57	CPN1	carboxypeptidase N, polypeptide 1	yes|up	yes|up	no|up	2
gene6018	ANGPTL5	angiopoietin-like 5	yes|up	yes|up	no|down	2
gene6017	CEP126	centrosomal protein 126kDa	yes|up	yes|up	no|up	2
gene6010	LOC106034203	matrix metalloproteinase-27-like	yes|up	yes|up	no|down	2
gene14888	CYTIP	cytohesin 1 interacting protein	yes|down	yes|down	no|down	2
gene15208	LOXL1	lysyl oxidase-like 1	yes|up	no|up	no|down	1
gene11588	DNAJA1	DnaJ (Hsp40) homolog, subfamily A, member 1	yes|down	yes|down	no|down	2
gene14663	PAQR5	progestin and adipoQ receptor family member V	yes|up	no|up	no|down	1
gene11583	XPA	xeroderma pigmentosum, complementation group A	yes|down	yes|down	no|down	2
gene11581	TSTD2	thiosulfate sulfurtransferase (rhodanese)-like domain containing 2	yes|down	yes|down	no|down	2
gene14080	POF1B	premature ovarian failure, 1B	yes|down	yes|down	no|down	2
gene11107	LOC106039699	neurabin-1-like, transcript variant X1	yes|up	yes|up	no|up	2
gene11106	SGCE	sarcoglycan, epsilon, transcript variant X5	yes|up	no|up	no|down	1
gene16782	LOC106045971	T-cell receptor alpha chain C region-like isoform X9	yes|down	yes|down	no|up	2
gene11109	HSPA8	heat shock 70kDa protein 8	yes|down	yes|down	yes|down	3
gene11108	CLMP	CXADR-like membrane protein, transcript variant X6	yes|up	yes|up	no|down	2
gene1304	ZNF831	zinc finger protein 831, transcript variant X2	yes|down	yes|down	no|up	2
gene10183	LOC106038708	calmodulin, striated muscle	yes|down	yes|down	no|down	2
gene5334	NUBP2	nucleotide binding protein 2	yes|down	yes|down	no|down	2
gene777	CHGA	chromogranin A	yes|down	yes|down	no|down	2
gene13882	DUSP7	dual specificity phosphatase 7	yes|down	yes|down	yes|down	3
gene10982	CBLN1	cerebellin 1 precursor	yes|down	yes|down	no|down	2
gene9552	STMN1	stathmin 1	yes|down	yes|down	no|up	2
gene4870	FAT2	FAT atypical cadherin 2	yes|down	yes|down	no|down	2
gene4308	ZNF827	zinc finger protein 827, transcript variant X5	yes|up	yes|up	no|up	2
gene4956	NFIA	nuclear factor I/A	yes|up	yes|up	no|down	2
gene8315	LOC106036650	uncharacterized LOC106036650, transcript variant X1	yes|down	yes|down	no|up	2
gene8314	BCL11A	B-cell CLL/lymphoma 11A (zinc finger protein), transcript variant X1	yes|down	yes|down	no|up	2
gene7870	AGTR1	angiotensin II receptor, type 1	yes|up	yes|up	no|down	2
gene10501	CA8	carbonic anhydrase VIII	yes|up	yes|up	no|up	2
gene118	LOC106044214	interferon-induced protein with tetratricopeptide repeats 5-like	yes|down	yes|down	no|up	2
gene114	KIF20B	kinesin family member 20B	yes|down	yes|down	no|down	2
gene13081	MTHFD2L	methylenetetrahydrofolate dehydrogenase (NADP+ dependent) 2-like, transcript variant X1	yes|down	no|down	no|up	1
gene117	SLC16A12	solute carrier family 16, member 12, transcript variant X1	yes|up	yes|up	no|up	2
gene6659	TFAP2A	transcription factor AP-2 alpha (activating enhancer binding protein 2 alpha)	yes|down	yes|down	no|down	2
gene18720	EMCN	endomucin, transcript variant X1	yes|up	yes|up	no|up	2
gene6651	LOC106034687	uncharacterized LOC106034687	yes|down	no|down	no|up	1
gene18723	LOC106048111	histone H2A.Z	yes|down	yes|down	no|up	2
gene18727	DAPP1	dual adaptor of phosphotyrosine and 3-phosphoinositides, transcript variant X1	yes|down	yes|down	no|up	2
gene17815	PLAGL2	pleiomorphic adenoma gene-like 2, transcript variant X1	yes|down	yes|down	no|down	2
gene19101	FAM166B	family with sequence similarity 166, member B, transcript variant X1	yes|down	no|down	no|up	1
gene17238	LOC106046504	uncharacterized LOC106046504	yes|up	no|up	no|down	1
gene18509	AIM1L	absent in melanoma 1-like	yes|down	yes|down	no|down	2
gene17235	CA5A	carbonic anhydrase VA, mitochondrial	yes|up	yes|up	no|down	2
gene17233	LOC106046506	uncharacterized LOC106046506	yes|down	no|down	no|up	1
gene17812	HCK	HCK proto-oncogene, Src family tyrosine kinase	yes|down	yes|down	no|down	2
gene596	WFS1	Wolfram syndrome 1 (wolframin)	yes|up	yes|up	no|up	2
gene591	LOC106035038	uncharacterized LOC106035038, transcript variant X1	yes|down	yes|down	yes|down	3
gene9042	IL2RG	interleukin 2 receptor, gamma	yes|down	yes|down	no|down	2
gene2203	LOC106029975	uncharacterized LOC106029975	yes|down	yes|down	no|down	2
gene2202	CCDC173	coiled-coil domain containing 173, transcript variant X1	yes|up	yes|up	no|down	2
gene2200	KLHL41	kelch-like family member 41	yes|down	yes|down	no|down	2
gene7019	LOC106035226	uncharacterized LOC106035226	yes|down	no|down	yes|up	2
gene3005	TXK	TXK tyrosine kinase, transcript variant X1	yes|down	yes|down	no|down	2
gene3559	LOC106031352	dynein light chain 1, cytoplasmic-like	yes|down	yes|down	no|down	2
gene2532	EOMES	eomesodermin	yes|down	yes|down	no|up	2
gene5927	SPATA1	spermatogenesis associated 1, transcript variant X1	yes|up	yes|up	no|up	2
gene5926	GNG5	guanine nucleotide binding protein (G protein), gamma 5	yes|down	no|down	no|up	1
gene6229	TENM2	teneurin transmembrane protein 2, transcript variant X1	yes|down	yes|down	no|down	2
gene12606	RILP	Rab interacting lysosomal protein	yes|down	yes|down	no|down	2
gene15055	FRMD6	FERM domain containing 6	yes|up	no|up	no|down	1
gene14509	ARHGAP40	Rho GTPase activating protein 40, transcript variant X1	yes|up	no|up	no|down	1
gene12024	LOC106040731	uncharacterized LOC106040731	yes|down	no|down	no|up	1
gene19925	TRAF4	TNF receptor-associated factor 4	yes|down	no|down	no|up	1
gene16015	CDC42SE2	CDC42 small effector 2, transcript variant X1	yes|down	yes|down	no|down	2
gene19927	LOC106049419	uncharacterized LOC106049419	yes|down	yes|down	no|up	2
gene13515	WNT11	wingless-type MMTV integration site family, member 11	yes|up	yes|up	yes|up	3
gene4109	NCEH1	neutral cholesterol ester hydrolase 1	yes|up	yes|up	no|down	2
gene12933	HPGD	hydroxyprostaglandin dehydrogenase 15-(NAD), transcript variant X1	yes|up	no|up	no|down	1
gene7272	SHQ1	SHQ1, H/ACA ribonucleoprotein assembly factor, transcript variant X1	yes|down	yes|down	no|down	2
gene7274	PPP4R2	protein phosphatase 4, regulatory subunit 2	yes|down	yes|down	no|down	2
gene7277	PDZRN3	PDZ domain containing ring finger 3, transcript variant X1	yes|up	no|up	no|down	1
gene7279	LOC106035440	E3 ubiquitin-protein ligase PDZRN3-like	yes|up	yes|up	no|down	2
gene44	LOXL4	lysyl oxidase-like 4	yes|up	yes|up	no|no test	2
gene47	HPSE2	heparanase 2 (inactive)	yes|up	yes|up	no|up	2
gene43	R3HCC1L	R3H domain and coiled-coil containing 1-like	yes|down	yes|down	no|down	2
gene42	CRTAC1	cartilage acidic protein 1	yes|down	yes|down	no|up	2
gene6002	PDGFD	platelet derived growth factor D	yes|up	yes|up	no|up	2
gene6007	LOC106034136	stromelysin-1-like	yes|up	no|up	yes|down	2
gene6009	LOC106034204	interstitial collagenase-like	yes|up	no|down	yes|down	2
gene9532	RSPO1	R-spondin 1, transcript variant X2	yes|up	yes|up	no|up	2
gene4090	LOC106031985	uncharacterized LOC106031985, transcript variant X2	yes|down	yes|down	no|up	2
gene2836	LY96	lymphocyte antigen 96, transcript variant X1	yes|down	yes|down	no|up	2
gene2830	CRISPLD1	cysteine-rich secretory protein LCCL domain containing 1, transcript variant X1	yes|up	no|up	no|down	1
gene16887	UBE2T	ubiquitin-conjugating enzyme E2T, transcript variant X1	yes|down	no|down	no|up	1
gene2993	GABRA2	gamma-aminobutyric acid (GABA) A receptor, alpha 2, transcript variant X1	yes|up	no|up	no|down	1
gene11590	LOC106040204	actin-like protein 7A	yes|down	yes|down	no|down	2
gene8143	LOC106036401	uncharacterized LOC106036401, transcript variant X2	yes|up	yes|up	no|up	2
gene8148	ARRDC4	arrestin domain containing 4	yes|down	yes|down	no|down	2
gene7669	FAM83F	family with sequence similarity 83, member F	yes|down	yes|down	no|down	2
gene11111	CRTAM	cytotoxic and regulatory T cell molecule, transcript variant X1	yes|down	no|down	yes|up	2
gene11114	LOC106039708	uncharacterized LOC106039708	yes|up	yes|up	no|up	2
gene11379	SGOL2	shugoshin-like 2 (S. pombe)	yes|up	no|up	no|down	1
gene1333	PAPLN	papilin, proteoglycan-like sulfated glycoprotein, transcript variant X1	yes|up	no|up	no|down	1
gene1336	LOC106042682	acyl-coenzyme A thioesterase 5-like	yes|down	yes|down	no|up	2
gene1335	LOC106040700	chromosome unknown open reading frame, human C14orf169	yes|down	yes|down	no|up	2
gene5327	CCNF	cyclin F	yes|down	yes|down	no|up	2
gene5329	LOC106033340	ankyrin repeat and fibronectin type-III domain-containing protein 1-like	yes|up	yes|up	no|up	2
gene8096	MFGE8	milk fat globule-EGF factor 8 protein	yes|up	yes|up	no|up	2
gene8097	HAPLN3	hyaluronan and proteoglycan link protein 3	yes|up	yes|up	no|up	2
gene8543	EEA1	early endosome antigen 1	yes|up	yes|up	no|up	2
gene20120	LOC106049629	histone H2A type 2-C-like	yes|up	yes|up	no|up	2
gene20127	LRRC4B	leucine rich repeat containing 4B	yes|up	yes|up	no|up	2
gene745	BDKRB1	bradykinin receptor B1	yes|up	no|up	no|down	1
gene10970	ADCY7	adenylate cyclase 7, transcript variant X2	yes|down	yes|down	no|up	2
gene4864	LOC106032833	uncharacterized LOC106032833	yes|down	yes|down	no|down	2
gene4867	CCDC69	coiled-coil domain containing 69	yes|down	yes|down	no|up	2
gene349	CDK1	cyclin-dependent kinase 1	yes|down	yes|down	no|up	2
gene9236	MAMLD1	mastermind-like domain containing 1	yes|up	no|down	yes|down	2
gene4862	GPX3	glutathione peroxidase 3	yes|up	no|up	no|down	1
gene8895	SETBP1	SET binding protein 1	yes|up	yes|up	no|down	2
gene4319	NR3C2	nuclear receptor subfamily 3, group C, member 2	yes|up	yes|up	no|up	2
gene8326	VRK2	vaccinia related kinase 2, transcript variant X1	yes|up	no|up	no|down	1
gene342	RTKN2	rhotekin 2, transcript variant X2	yes|down	no|down	no|up	1
gene10578	CHRNA9	cholinergic receptor, nicotinic, alpha 9 (neuronal), transcript variant X1	yes|down	yes|down	no|up	2
gene10577	RHOH	ras homolog family member H, transcript variant X1	yes|down	yes|down	no|up	2
gene3683	EPHX1	epoxide hydrolase 1, microsomal (xenobiotic), transcript variant X2	yes|up	no|up	no|down	1
gene13075	LOC106041891	uncharacterized LOC106041891, transcript variant X2	yes|down	no|down	no|up	1
gene13078	AREG	amphiregulin	yes|down	yes|down	yes|down	3
gene16933	FKBP5	FK506 binding protein 5, transcript variant X1	yes|down	yes|down	no|down	2
gene16932	TULP1	tubby like protein 1	yes|up	yes|up	no|up	2
gene18754	LOC106048154	SH3 and multiple ankyrin repeat domains protein 3-like	yes|up	yes|up	no|up	2
gene6644	LOC106034784	uncharacterized LOC106034784	yes|down	no|down	no|up	1
gene9948	MYC	v-myc avian myelocytomatosis viral oncogene homolog	yes|down	yes|down	yes|down	3
gene18594	LOC106048010		yes|down	yes|down	no|up	2
gene19114	ART5	ADP-ribosyltransferase 5, transcript variant X3	yes|down	yes|down	no|up	2
gene10796	WNT10A	wingless-type MMTV integration site family, member 10A	yes|down	yes|down	no|down	2
gene19119	RHOG	ras homolog family member G	yes|down	yes|down	no|down	2
gene9944	LOC106038467	uncharacterized LOC106038467, transcript variant X10	yes|down	yes|down	no|down	2
gene13210	ST7	suppression of tumorigenicity 7	yes|up	yes|up	no|down	2
gene18579	CILP2	cartilage intermediate layer protein 2	yes|up	yes|up	no|down	2
gene8759	ENTPD2	ectonucleoside triphosphate diphosphohydrolase 2, transcript variant X1	yes|up	no|up	no|down	1
gene19474	CHDH	choline dehydrogenase	yes|up	yes|up	no|up	2
gene2232	CDCA7	cell division cycle associated 7, transcript variant X1	yes|down	yes|down	no|up	2
gene9058	ETV1	ets variant 1, transcript variant X1	yes|up	no|up	no|down	1
gene8204	FIGNL1	fidgetin-like 1, transcript variant X1	yes|down	no|down	no|up	1
gene9051	ISPD	isoprenoid synthase domain containing, transcript variant X1	yes|up	yes|up	no|up	2
gene9055	AGMO	alkylglycerol monooxygenase	yes|up	no|up	no|down	1
gene12506	MOV10	Mov10 RISC complex RNA helicase	yes|down	yes|down	no|down	2
gene3544	PIK3IP1	phosphoinositide-3-kinase interacting protein 1	yes|up	yes|up	no|up	2
gene2012	NFKBIE	nuclear factor of kappa light polypeptide gene enhancer in B-cells inhibitor, epsilon, transcript variant X1	yes|down	yes|down	no|down	2
gene8753	LOC106037140	POU domain, class 3, transcription factor 3-like, transcript variant X1	yes|down	yes|down	no|down	2
gene12504	PPM1J	protein phosphatase, Mg2+/Mn2+ dependent, 1J, transcript variant X1	yes|down	yes|down	no|down	2
gene2015	AARS2	alanyl-tRNA synthetase 2, mitochondrial, transcript variant X1	yes|down	no|down	no|up	1
gene13699	PHLDA2	pleckstrin homology-like domain, family A, member 2	yes|down	yes|down	yes|down	3
gene6254	LOC106034391	uncharacterized LOC106034391, transcript variant X2	yes|down	yes|down	no|up	2
gene6255	PTTG1	pituitary tumor-transforming 1, transcript variant X2	yes|down	yes|down	no|up	2
gene313	DNA2	DNA replication helicase/nuclease 2	yes|down	yes|down	no|up	2
gene15914	NMRK2	nicotinamide riboside kinase 2	yes|down	yes|down	no|up	2
gene12033	MVB12B	multivesicular body subunit 12B, transcript variant X1	yes|down	no|down	no|up	1
gene19934	LOC106049424	putative serine protease 41	yes|down	yes|down	no|down	2
gene13526	TSKU	tsukushi, small leucine rich proteoglycan	yes|up	no|down	yes|down	2
gene13875	GRK6	G protein-coupled receptor kinase 6, transcript variant X1	yes|down	no|down	no|up	1
gene2499	ZNF385D	zinc finger protein 385D, transcript variant X1	yes|up	yes|up	no|down	2
gene2496	SGOL1	shugoshin-like 1 (S. pombe)	yes|down	yes|down	no|up	2
gene2494	PP2D1	protein phosphatase 2C-like domain containing 1	yes|up	yes|up	no|down	2
gene2495	KAT2B	K(lysine) acetyltransferase 2B, transcript variant X1	yes|up	yes|up	no|up	2
gene12929	LOC106041754	uncharacterized LOC106041754, transcript variant X2	yes|down	yes|down	no|down	2
gene18999	SLC6A17	solute carrier family 6 (neutral amino acid transporter), member 17	yes|up	no|down	yes|down	2
gene16460	RPL36	ribosomal protein L36	yes|down	no|down	no|up	1
gene76	BLNK	B-cell linker, transcript variant X1	yes|down	yes|down	no|up	2
gene6118	CCDC170	coiled-coil domain containing 170, transcript variant X1	yes|up	yes|up	no|up	2
gene6070	LOC106034162	putative N-acetylated-alpha-linked acidic dipeptidase, transcript variant X1	yes|up	yes|up	no|up	2
gene20396	LOC106049916	Ig heavy chain V region 914-like	yes|down	no|down	no|down	1
gene20397	LOC106049912	uncharacterized LOC106049912	yes|down	yes|down	no|down	2
gene20398	LOC106049913	Ig mu chain C region-like	yes|down	yes|down	no|down	2
gene4080	MECOM	MDS1 and EVI1 complex locus, transcript variant X1	yes|up	yes|up	no|down	2
gene4087	LRRC31	leucine rich repeat containing 31, transcript variant X4	yes|down	yes|down	no|down	2
gene2826	ZFHX4	zinc finger homeobox 4	yes|up	yes|up	no|down	2
gene2822	PKIA	protein kinase (cAMP-dependent, catalytic) inhibitor alpha, transcript variant X1	yes|up	no|up	no|down	1
gene2820	ZC2HC1A	zinc finger, C2HC-type containing 1A	yes|up	no|up	no|down	1
gene15263	LOC106044308	tyrosine-protein phosphatase non-receptor type 11-like	yes|down	yes|down	no|down	2
gene7675	SLC25A17	solute carrier family 25 (mitochondrial carrier; peroxisomal membrane protein, 34kDa), member 17, transcript variant X1	yes|down	yes|down	no|up	2
gene8154	SYNM	synemin, intermediate filament protein	yes|up	yes|up	no|down	2
gene8156	MEF2A	myocyte enhancer factor 2A, transcript variant X1	yes|up	no|up	no|down	1
gene8151	FAM169B	family with sequence similarity 169, member B, transcript variant X1	yes|up	yes|up	no|up	2
gene11906	APLP2	amyloid beta (A4) precursor-like protein 2, transcript variant X1	yes|up	yes|up	no|up	2
gene8159	LOC106036472	uncharacterized LOC106036472	yes|down	yes|down	no|up	2
gene9086	TAC1	tachykinin, precursor 1	yes|down	no|down	no|down	1
gene1328	DPF3	D4, zinc and double PHD fingers, family 3	yes|down	yes|down	no|down	2
gene6811	CKAP2	cytoskeleton associated protein 2	yes|down	yes|down	no|down	2
gene5356	NLRC3	NLR family, CARD domain containing 3, transcript variant X2	yes|down	yes|down	no|up	2
gene14137	GNAO1	guanine nucleotide binding protein (G protein), alpha activating activity polypeptide O, transcript variant X1	yes|down	yes|down	no|down	2
gene8086	PLIN1	perilipin 1	yes|up	yes|up	no|up	2
gene18465	PTPN6	protein tyrosine phosphatase, non-receptor type 6, transcript variant X1	yes|down	yes|down	no|up	2
gene20641	LOC106029502	antigen peptide transporter 1-like	yes|down	yes|down	no|down	2
gene284	UNC5B	unc-5 netrin receptor B, transcript variant X1	yes|up	no|up	no|down	1
gene286	CDH23	cadherin-related 23	yes|down	yes|down	no|up	2
gene10962	STX11	syntaxin 11, transcript variant X1	yes|down	yes|down	no|down	2
gene10961	FNDC1	fibronectin type III domain containing 1, transcript variant X1	yes|up	no|up	no|down	1
gene11784	LOC106040422	metalloprotease TIKI1-like	yes|down	yes|down	no|up	2
gene9206	LOC106037682	uncharacterized LOC106037682, transcript variant X2	yes|up	yes|up	no|up	2
gene4323	DCLK2	doublecortin-like kinase 2	yes|up	no|up	no|down	1
gene9200	45541	septin 6, transcript variant X1	yes|down	yes|down	no|up	2
gene353	CCDC6	coiled-coil domain containing 6	yes|up	yes|up	no|up	2
gene350	ANK3	ankyrin 3, node of Ranvier (ankyrin G)	yes|up	yes|up	no|down	2
gene8331	MRPS25	mitochondrial ribosomal protein S25	yes|down	yes|down	no|down	2
gene357	BICC1	BicC family RNA binding protein 1, transcript variant X1	yes|up	no|up	no|down	1
gene10563	TMEM156	transmembrane protein 156, transcript variant X2	yes|down	yes|down	no|down	2
gene10561	LOC106039090	toll-like receptor 1, transcript variant X2	yes|down	yes|down	no|down	2
gene17032	SNRPG	small nuclear ribonucleoprotein polypeptide G	yes|down	no|down	no|up	1
gene19563	SLC6A9	solute carrier family 6 (neurotransmitter transporter, glycine), member 9	yes|down	yes|down	no|down	2
gene17780	FN3K	fructosamine 3 kinase, transcript variant X1	yes|up	yes|up	yes|up	3
gene16927	FANCE	Fanconi anemia, complementation group E	yes|down	yes|down	no|up	2
gene14230	SMYD5	SMYD family member 5	yes|down	yes|down	no|down	2
gene18748	LOC106048163	src substrate cortactin-like, transcript variant X1	yes|down	yes|down	no|up	2
gene18749	LOC106048164	olfactory receptor 1020-like	yes|down	yes|down	no|up	2
gene16928	LOC106046127	protein-methionine sulfoxide oxidase MICAL1-like	yes|down	yes|down	no|down	2
gene16929	SMPD2	sphingomyelin phosphodiesterase 2, neutral membrane (neutral sphingomyelinase)	yes|down	yes|down	no|down	2
gene18740	FOXM1	forkhead box M1	yes|down	yes|down	no|up	2
gene757	LOC106036355	serpin A3-4-like, transcript variant X1	yes|down	yes|down	no|down	2
gene19162	LOC106048595	C-C motif chemokine 19-like	yes|down	yes|down	no|up	2
gene15756	TP63	tumor protein p63, transcript variant X1	yes|down	yes|down	no|down	2
gene9680	TFAP2B	transcription factor AP-2 beta (activating enhancer binding protein 2 beta), transcript variant X2	yes|up	yes|up	no|up	2
gene9937	RGS20	regulator of G-protein signaling 20	yes|down	yes|down	no|down	2
gene9687	RHAG	Rh-associated glycoprotein	yes|up	yes|up	no|down	2
gene758	LOC106036370	serine protease inhibitor 2.1-like, transcript variant X1	yes|up	yes|up	no|up	2
gene17258	LOC106046522	sulfotransferase family cytosolic 2B member 1-like	yes|down	yes|down	no|up	2
gene15320	PHACTR1	phosphatase and actin regulator 1, transcript variant X2	yes|up	yes|up	no|up	2
gene1040	EPHA6	EPH receptor A6, transcript variant X1	yes|up	yes|up	no|up	2
gene2225	LOC106030000	uncharacterized LOC106030000, transcript variant X2	yes|up	yes|up	no|up	2
gene138	ERCC6	excision repair cross-complementation group 6, transcript variant X1	yes|down	no|down	no|up	1
gene9063	VWDE	von Willebrand factor D and EGF domains, transcript variant X1	yes|down	no|down	no|up	1
gene9061	SCIN	scinderin	yes|up	yes|up	no|up	2
gene3574	CIT	citron rho-interacting serine/threonine kinase	yes|down	yes|down	no|down	2
gene19887	SDCBP2	syndecan binding protein (syntenin) 2	yes|down	yes|down	no|up	2
gene6094	SASH1	SAM and SH3 domain containing 1, transcript variant X1	yes|up	yes|up	no|down	2
gene13689	PTPN5	protein tyrosine phosphatase, non-receptor type 5 (striatum-enriched), transcript variant X7	yes|up	no|up	no|down	1
gene6247	GABRB2	gamma-aminobutyric acid (GABA) A receptor, beta 2, transcript variant X3	yes|up	yes|up	no|up	2
gene6243	GABRA1	gamma-aminobutyric acid (GABA) A receptor, alpha 1, transcript variant X4	yes|down	no|down	no|up	1
gene1597	EMP1	epithelial membrane protein 1	yes|up	yes|down	yes|down	3
gene1593	LOC106045920	uncharacterized LOC106045920	yes|up	no|up	no|down	1
gene12624	GUSB	glucuronidase, beta, transcript variant X1	yes|up	no|up	no|down	1
gene16780	LOC106046001	von Willebrand factor A domain-containing protein 5A-like, transcript variant X1	yes|down	no|down	no|up	1
gene15079	NTNG2	netrin G2, transcript variant X1	yes|up	yes|up	no|up	2
gene16783	LOC106045966	Ig heavy chain Mem5-like	yes|down	no|down	no|up	1
gene12557	IKBKE	inhibitor of kappa light polypeptide gene enhancer in B-cells, kinase epsilon, transcript variant X3	yes|down	yes|down	no|up	2
gene12556	RASSF5	Ras association (RalGDS/AF-6) domain family member 5	yes|down	yes|down	no|up	2
gene19904	ABCC5	ATP-binding cassette, sub-family C (CFTR/MRP), member 5, transcript variant X1	yes|down	yes|down	no|down	2
gene13538	LOC106042437	uncharacterized LOC106042437, transcript variant X1	yes|down	yes|down	yes|down	3
gene2488	SATB1	SATB homeobox 1, transcript variant X5	yes|down	no|down	no|up	1
gene1662	SYT1	synaptotagmin I, transcript variant X1	yes|up	no|up	no|down	1
gene18985	NRTN	neurturin	yes|down	yes|down	no|down	2
gene8030	IL7R	interleukin 7 receptor	yes|down	no|down	no|up	1
gene18988	ATCAY	ataxia, cerebellar, Cayman type, transcript variant X1	yes|up	no|up	no|down	1
gene3201	DENND2A	DENN/MADD domain containing 2A, transcript variant X1	yes|up	yes|up	no|up	2
gene62	LOC106037870	adhesion G protein-coupled receptor A3-like	yes|up	yes|up	yes|up	3
gene15783	COTL1	coactosin-like F-actin binding protein 1	yes|down	yes|down	no|up	2
gene16473	ANGPTL4	angiopoietin-like 4	yes|up	no|down	no|down	1
gene16471	LOC106045675	uncharacterized LOC106045675	yes|down	no|down	no|up	1
gene16477	LOC106045698	bone morphogenetic protein 2-like	yes|down	yes|down	no|down	2
gene16475	NDUFA7	NADH dehydrogenase (ubiquinone) 1 alpha subcomplex, 7, 14.5kDa	yes|down	no|down	no|up	1
gene3687	LBR	lamin B receptor, transcript variant X1	yes|down	no|down	no|up	1
gene6068	CHORDC1	cysteine and histidine-rich domain (CHORD) containing 1	yes|down	yes|down	yes|down	3
gene6640	JMJD6	jumonji domain containing 6	yes|down	yes|down	yes|down	3
gene15259	TTLL10	tubulin tyrosine ligase-like family member 10, transcript variant X1	yes|down	yes|down	no|up	2
gene15258	LOC106044313	rho guanine nucleotide exchange factor 7-like, transcript variant X1	yes|down	yes|down	no|up	2
gene2815	HEY1	hes-related family bHLH transcription factor with YRPW motif 1	yes|up	yes|up	no|up	2
gene15257	TNFRSF18	tumor necrosis factor receptor superfamily, member 18	yes|down	yes|down	no|down	2
gene14784	RAP1GAP2	RAP1 GTPase activating protein 2	yes|down	yes|down	no|down	2
gene15282	PIK3CD	phosphatidylinositol-4,5-bisphosphate 3-kinase, catalytic subunit delta, transcript variant X2	yes|down	no|down	no|up	1
gene11572	LOC106040102	uncharacterized LOC106040102	yes|down	yes|down	no|down	2
gene11570	MASP2	mannan-binding lectin serine peptidase 2, transcript variant X1	yes|down	yes|down	no|down	2
gene4749	IRF1	interferon regulatory factor 1, transcript variant X2	yes|down	yes|down	no|down	2
gene6809	THSD1	thrombospondin, type I, domain containing 1	yes|up	yes|up	no|up	2
gene6808	LOC106035094	fibrinogen-like protein 1, transcript variant X1	yes|up	yes|up	no|up	2
gene11315	RNF152	ring finger protein 152, transcript variant X7	yes|up	yes|up	yes|up	3
gene16566	PRR11	proline rich 11, transcript variant X1	yes|down	yes|down	no|up	2
gene6806	LOC106035089	uncharacterized LOC106035089	yes|up	yes|up	no|up	2
gene1863	KCNK1	potassium channel, two pore domain subfamily K, member 1, transcript variant X1	yes|down	no|down	no|up	1
gene5347	45547	septin 12, transcript variant X1	yes|down	yes|down	no|up	2
gene5346	LOC106033391	myeloid-associated differentiation marker-like	yes|down	yes|down	no|up	2
gene8522	LOC106036885	uncharacterized LOC106036885, transcript variant X4	yes|up	yes|up	no|up	2
gene17211	LIX1	limb and CNS expressed 1, transcript variant X1	yes|down	no|down	no|up	1
gene4339	TMEM154	transmembrane protein 154, transcript variant X1	yes|down	yes|down	no|down	2
gene4338	LOC106032252	uncharacterized LOC106032252	yes|up	yes|up	no|up	2
gene4331	SH3D19	SH3 domain containing 19	yes|up	no|up	no|down	1
gene10220	PRKCQ	protein kinase C, theta, transcript variant X3	yes|down	yes|down	no|up	2
gene19351	SH3GL2	SH3-domain GRB2-like 2, transcript variant X1	yes|up	yes|up	no|up	2
gene10226	ITIH2	inter-alpha-trypsin inhibitor heavy chain 2	yes|up	no|up	no|down	1
gene13054	DMP1	dentin matrix acidic phosphoprotein 1	yes|up	yes|up	no|up	2
gene13052	LOC106041857	uncharacterized LOC106041857, transcript variant X2	yes|up	yes|up	no|down	2
gene17025	LRRTM4	leucine rich repeat transmembrane neuronal 4, transcript variant X4	yes|up	yes|up	no|down	2
gene13059	ABCG2	ATP-binding cassette, sub-family G (WHITE), member 2 (Junior blood group)	yes|down	no|down	no|up	1
gene13058	PKD2	polycystic kidney disease 2 (autosomal dominant), transcript variant X4	yes|up	yes|up	no|up	2
gene19689	SARM1	sterile alpha and TIR motif containing 1	yes|up	yes|up	no|up	2
gene6662	LOC106034906	uncharacterized LOC106034906	yes|up	yes|up	no|up	2
gene18775	LOC106048184	chromosome unknown open reading frame, human C4orf33, transcript variant X1	yes|down	no|down	no|up	1
gene19681	SPAG5	sperm associated antigen 5	yes|down	yes|down	no|up	2
gene18779	BNC2	basonuclin 2	yes|up	yes|up	no|down	2
gene9699	SUPT3H	suppressor of Ty 3 homolog (S. cerevisiae)	yes|up	yes|up	no|up	2
gene3981	COL17A1	collagen, type XVII, alpha 1	yes|down	yes|down	no|down	2
gene9923	LOC106038386	chromosome unknown open reading frame, human C8orf22	yes|up	yes|up	yes|up	3
gene17240	ZNF469	zinc finger protein 469	yes|up	yes|up	no|up	2
gene17241	ZFPM1	zinc finger protein, FOG family member 1	yes|up	no|up	no|down	1
gene11407	SYN2	synapsin II	yes|up	yes|up	no|down	2
gene15958	LOC106045075	uncharacterized LOC106045075	yes|down	no|down	no|up	1
gene1052	CD247	CD247 molecule	yes|down	yes|down	no|up	2
gene1050	RCSD1	RCSD domain containing 1, transcript variant X1	yes|down	no|down	no|up	1
gene9078	GLCCI1	glucocorticoid induced 1, transcript variant X1	yes|down	yes|down	no|down	2
gene7043	NIPAL2	NIPA-like domain containing 2	yes|up	yes|up	no|up	2
gene7041	POP1	POP1 homolog, ribonuclease P/MRP subunit	yes|down	yes|down	no|down	2
gene7046	STK3	serine/threonine kinase 3	yes|up	yes|up	no|down	2
gene7048	OSR2	odd-skipped related transciption factor 2	yes|up	yes|up	no|down	2
gene7049	VPS13B	vacuolar protein sorting 13 homolog B (yeast)	yes|up	no|up	no|down	1
gene6272	SLC26A2	solute carrier family 26 (anion exchanger), member 2, transcript variant X5	yes|down	yes|down	no|down	2
gene16264	FAM83C	family with sequence similarity 83, member C	yes|down	yes|down	no|down	2
[truncated: 402 more rows]
