# Supplementary material for: Transcriptome Profiling Unveils Key Genes Regulating the Growth and Development of Yangzhou Goose Knob
Source: Int J Mol Sci. 2024 Apr 10;25(8):4166. doi: 10.3390/ijms25084166 (PMC11050116; doi:10.3390/ijms25084166)
Supplement: Supplementary file 1 [file ijms-25-04166-s001.zip › Table S4.xlsx]

## Sheet: Guide
Table S4. GO/KEGG enrichment of DEGs
Guide
KEGG	KEGG pathway of DEGs
GO	GO enrichment of DEGs

## Sheet: KEGG
Num	Pathway id	Description	Database	Ratio_in_study	Ratio_in_pop	Pvalue	Padjust	First Category	Second Category	Gene_ids	Gene_names
33	map05340	Primary immunodeficiency	KEGG PATHWAY	33/2644	39/11318	8.80212e-16	2.92231e-13	Human Diseases	Immune disease	gene20665|gene12437|gene8030|gene497|gene496|gene17853|gene18816|gene20335|gene1484|gene1485|gene8984|gene76|gene1626|gene18476|gene3268|gene20396|gene20397|gene14433|gene11186|gene11185|gene20398|gene20399|gene9042|gene4226|gene18968|gene18685|gene9468|gene9293|gene20401|gene13131|gene2315|gene20641|gene20642	LOC106029527;CIITA;IL7R;CD8A;LOC106033965;CD40;LOC106048210;LOC106049856;RAG2;RAG1;CD40LG;BLNK;TNFRSF13C;NFKB276;UNG;LOC106049916;LOC106049912;LOC106043396;CD3E;CD3D;LOC106049913;LOC106049914;IL2RG;TNFRSF13B;ZAP70;AICDA;LCK;GPR1613;LOC106049915;PTPRC;LOC106030066;LOC106029502;TAP2
93	map04060	Cytokine-cytokine receptor interaction	KEGG PATHWAY	93/2644	205/11318	2.37282e-12	3.93888e-10	Environmental Information Processing	Signaling molecules and interaction	gene11193|gene18995|gene15810|gene2407|gene10215|gene12638|gene12791|gene7599|gene14612|gene9870|gene8681|gene12268|gene12788|gene12787|gene16477|gene19844|gene11687|gene8014|gene15257|gene8390|gene9028|gene11169|gene9415|gene9414|gene13967|gene2120|gene16692|gene17908|gene14034|gene12997|gene7606|gene15129|gene6326|gene11544|gene11543|gene20740|gene8032|gene14611|gene8030|gene17853|gene6887|gene…	IL10RA;CSF1;LOC10604815310;IL6;IL2RA;LOC106041491;FASLG;LOC106035885;IL12RB2;LOC106038357;TNFSF8;ACVR2A;LOC106041570;TNFSF4;LOC106045698;LOC106049328;TNFRSF19;LIFR;TNFRSF18;IL5RA;IL13RA2;IL18;IL22RA1;IFNLR1;INHBA;LOC106029911;LOC106045913;TNFRSF25;EDA;CX3CR1;BLNK06;LOC106044089;ACKR3;TNFRSF8;TNFRSF1B;CLCF1;PRLR;IL23R;IL7R;CD40;TNFSF11;CCR4;LOC106046046;TNFRSF13C;IL21R;IL2RG;LOC106041040;LOC106041…
68	map04514	Cell adhesion molecules (CAMs)	KEGG PATHWAY	68/2644	141/11318	7.75781e-11	8.58531e-09	Environmental Information Processing	Signaling molecules and interaction	gene19675|gene19394|gene3276|gene1822|gene15079|gene12755|gene17853|gene2296|gene6749|gene7779|gene497|gene496|gene12308|gene7029|gene14630|gene12205|gene20337|gene7499|gene1063|gene14249|gene12586|gene12585|gene18075|gene15210|gene8984|gene8620|gene6138|gene18476|gene15491|gene5867|gene20127|gene20407|gene18636|gene16782|gene16048|gene20631|gene20630|gene19621|gene19851|gene16356|gene20840|gene1…	CLDN19;LRRC4;SELPLG;CNTN1;NTNG2;LOC106041540;CD40;ITGA4;PTPRM;ICOSLG;CD8A;LOC106033965;LOC106041034;SDC2;NEGR1;SDC4;LOC106049848;CD99;CD2;LOC106043214;NFASC;CNTN2;CNTNAP2;CD276;CD40LG;NCAM2;CLDN20;NFKB276;LOC106044537;PTPRF;LRRC4B;LOC106049920;CNTNAP1;LOC106045971;SDC3;LOC106029493;LOC106029492;MADCAM1;CLDN10;ITGA9;LOC10603007840;PDCD1;LOC106046592;LOC106046390;CD80;NTNG1;ESAM;VCAM1;VCAN;LOC10604…
55	map04064	NF-kappa B signaling pathway	KEGG PATHWAY	55/2644	114/11318	4.87645e-09	4.04745e-07	Environmental Information Processing	Signal transduction	gene17686|gene20665|gene11983|gene15810|gene16782|gene13304|gene11888|gene14384|gene3669|gene17853|gene16487|gene2836|gene20213|gene6887|gene10253|gene8744|gene4181|gene20146|gene76|gene132|gene19270|gene1626|gene5182|gene465|gene16188|gene10829|gene20396|gene20397|gene12290|gene11576|gene5990|gene14433|gene4565|gene20398|gene20399|gene3891|gene16801|gene16004|gene16394|gene18968|gene14034|gene76…	TRAF3;LOC106029527;TRAF1;LOC10604815310;LOC106045971;LOC106042201;TIRAP;BCL2A1;TRAF5;CD40;LOC106045683;LY96;IL1B;TNFSF11;NFKBIA;TRAF2;CARD11;LOC106049641;BLNK;CXCL12;PIK3AP170;TNFRSF13C;LOC106033293;PLAU;NFKB1;VCAM1;LOC106049916;LOC106049912;LOC106041041;DDX58;PTGS2;LOC106043396;TNFAIP3;LOC106049913;LOC106049914;PIDD1;PRKCB;SYK;EDA2R;ZAP70;EDA;BLNK15;NFKB2;LOC106030078;LCK;XIAP;LOC106041672;PIK3A…
44	map04640	Hematopoietic cell lineage	KEGG PATHWAY	44/2644	89/11318	6.70347e-08	4.4511e-06	Organismal Systems	Immune system	gene20665|gene18995|gene2407|gene10215|gene2296|gene497|gene496|gene7487|gene8390|gene20213|gene1063|gene18876|gene7346|gene20146|gene16832|gene12538|gene11186|gene18476|gene20396|gene20397|gene14433|gene20631|gene20630|gene11185|gene16336|gene12357|gene10714|gene20398|gene20399|gene20840|gene16763|gene12858|gene17801|gene1497|gene1496|gene20593|gene8030|gene12857|gene9522|gene20401|gene19161|gen…	LOC106029527;CSF1;IL6;IL2RA;ITGA4;CD8A;LOC106033965;LOC106035752;IL5RA;IL1B;CD2;ACTN26;ITGA2;LOC106049641;LOC106046046;CD34;CD3E;NFKB276;LOC106049916;LOC106049912;LOC106043396;LOC106029493;LOC106029492;CD3D;CD9;FLT3;GP5;LOC106049913;LOC106049914;LOC10603007840;ITGB3;IL1R2;LOC106047112;LOC106044451;CD44;LOC106029451;IL7R;LOC106041672;CSF3R;LOC106049915;IL11RA;LOC106049920;LOC106049922;CD36
37	map05150	Staphylococcus aureus infection	KEGG PATHWAY	37/2644	76/11318	1.18661e-06	6.56593e-05	Human Diseases	Infectious disease: bacterial	gene20665|gene16782|gene11570|gene11984|gene19271|gene19270|gene20338|gene18597|gene18595|gene18594|gene18593|gene20066|gene20067|gene20068|gene20069|gene12730|gene18599|gene12732|gene20396|gene20397|gene12755|gene18591|gene14433|gene19609|gene20398|gene20399|gene20840|gene18600|gene3276|gene17302|gene20401|gene20407|gene20405|gene9668|gene18460|gene20137|gene2370	LOC106029527;LOC106045971;STK40;C5;PIK3AP171;PIK3AP170;LOC106049849;LOC106048008;LOC106048012;LOC106048010;LOC106047978;LOC106049570;KRT23;KRT20;LOC106049573;LOC106041557;LOC106048011;CFH;LOC106049916;LOC106049912;LOC106041540;LOC106047977;LOC106043396;LOC106049106;LOC106049913;LOC106049914;LOC10603007840;LOC106047979;SELPLG;PTAFR;LOC106049915;LOC106049920;LOC106049922;LOC106038139;NFKB260;LOC106…
28	map04672	Intestinal immune network for IgA production	KEGG PATHWAY	28/2644	54/11318	4.97619e-06	0.000236014	Organismal Systems	Immune system	gene20665|gene15810|gene16782|gene2407|gene2296|gene7779|gene17853|gene4226|gene1626|gene132|gene8984|gene20396|gene20397|gene14433|gene10735|gene19621|gene20398|gene20399|gene20840|gene1071|gene18685|gene19271|gene19270|gene20401|gene20407|gene20405|gene2313|gene2315	LOC106029527;LOC10604815310;LOC106045971;IL6;ITGA4;ICOSLG;CD40;TNFRSF13B;TNFRSF13C;CXCL12;CD40LG;LOC106049916;LOC106049912;LOC106043396;CXCR4;MADCAM1;LOC106049913;LOC106049914;LOC10603007840;CD80;AICDA;PIK3AP171;PIK3AP170;LOC106049915;LOC106049920;LOC106049922;CD28;LOC106030066
40	map05323	Rheumatoid arthritis	KEGG PATHWAY	40/2644	90/11318	7.88523e-06	0.000327237	Human Diseases	Immune disease	gene12292|gene20665|gene18995|gene15810|gene16782|gene4965|gene2407|gene3373|gene8686|gene4347|gene5182|gene20213|gene11169|gene6887|gene14247|gene14433|gene132|gene20401|gene19789|gene12638|gene20396|gene20397|gene20823|gene20398|gene20399|gene20840|gene1071|gene2944|gene10304|gene19271|gene19270|gene15892|gene5185|gene20407|gene6007|gene20405|gene6009|gene2313|gene2314|gene2370	LOC106041040;LOC106029527;CSF1;LOC10604815310;LOC106045971;JUN;IL6;TCTN2;ATP6V1G1;LOC106032265;LOC106033293;IL1B;IL18;TNFSF11;ATP6V1B1;LOC106043396;CXCL12;LOC106049915;LOC10603419789;LOC106041491;LOC106049916;LOC106049912;LOC10603007823;LOC106049913;LOC106049914;LOC10603007840;CD80;ATP6V1C2;FOS;PIK3AP171;PIK3AP170;LOC106044971;LOC106033294;LOC106049920;LOC106034136;LOC106049922;EVC9;CD28;CTLA4;IT…
37	map04662	B cell receptor signaling pathway	KEGG PATHWAY	37/2644	85/11318	3.00428e-05	0.00110825	Organismal Systems	Immune system	gene20665|gene16487|gene2012|gene4965|gene76|gene1227|gene5078|gene192|gene7610|gene14041|gene17608|gene10253|gene4181|gene8078|gene9821|gene16188|gene20396|gene20397|gene13709|gene14433|gene20631|gene20630|gene15282|gene19959|gene20398|gene20399|gene16004|gene208|gene10304|gene14042|gene18727|gene9293|gene20401|gene16801|gene11669|gene10479|gene18465	LOC106029527;LOC106045683;NFKBIE;JUN;BLNK;NFATC2;PIK3R3;PIK3AP1;BLNK10;CHST11;CD79B;NFKBIA;CARD11;CD72;NFATC1;NFKB1;LOC106049916;LOC106049912;CD81;LOC106043396;LOC106029493;LOC106029492;PIK3CD;LOC106049445;LOC106049913;LOC106049914;SYK;LOC106030078;FOS;CHST12;DAPP1;GPR1613;LOC106049915;PRKCB;INPP5D;LYN;NFKB265
34	map05416	Viral myocarditis	KEGG PATHWAY	34/2644	77/11318	4.36696e-05	0.00144983	Human Diseases	Cardiovascular disease	gene20665|gene20397|gene16782|gene20542|gene4209|gene3016|gene17853|gene6988|gene8608|gene989|gene7610|gene19308|gene8984|gene11690|gene20396|gene4899|gene15062|gene14433|gene20398|gene20399|gene20840|gene20337|gene1071|gene4508|gene13298|gene19180|gene19271|gene19270|gene20401|gene20407|gene20405|gene20644|gene2313|gene2370	LOC106029527;LOC106049912;LOC106045971;PRF1;LOC106032083;SGCB;CD40;CASP3;CXADR;MYH15;BLNK10;DAG1;CD40LG;SGCG;LOC106049916;SGCD;ABL1;LOC106043396;LOC106049913;LOC106049914;LOC10603007840;LOC106049848;CD80;LAMA2;CXCL1298;EIF4G3;PIK3AP171;PIK3AP170;LOC106049915;LOC106049920;LOC106049922;LOC106029505;CD28;ITGB2
21	map05330	Allograft rejection	KEGG PATHWAY	21/2644	40/11318	5.95723e-05	0.001798	Human Diseases	Immune disease	gene20396|gene20397|gene20337|gene14433|gene20840|gene16782|gene20405|gene20542|gene20398|gene20399|gene19271|gene1071|gene8984|gene20665|gene20407|gene20401|gene17853|gene2313|gene12791|gene20644|gene19270	LOC106049916;LOC106049912;LOC106049848;LOC106043396;LOC10603007840;LOC106045971;LOC106049922;PRF1;LOC106049913;LOC106049914;PIK3AP171;CD80;CD40LG;LOC106029527;LOC106049920;LOC106049915;CD40;CD28;FASLG;LOC106029505;PIK3AP170
23	map05320	Autoimmune thyroid disease	KEGG PATHWAY	23/2644	46/11318	7.282e-05	0.00185971	Human Diseases	Immune disease	gene20665|gene16782|gene20542|gene17853|gene20337|gene8984|gene15495|gene20396|gene20397|gene14433|gene12791|gene20398|gene20399|gene20840|gene1071|gene19271|gene19270|gene20401|gene20407|gene20405|gene20644|gene2313|gene2314	LOC106029527;LOC106045971;PRF1;CD40;LOC106049848;CD40LG;TSHR;LOC106049916;LOC106049912;LOC106043396;FASLG;LOC106049913;LOC106049914;LOC10603007840;CD80;PIK3AP171;PIK3AP170;LOC106049915;LOC106049920;LOC106049922;LOC106029505;CD28;CTLA4
157	map05200	Pathways in cancer	KEGG PATHWAY	157/2644	513/11318	6.99383e-05	0.00193496	Human Diseases	Cancer: overview	gene8973|gene10062|gene2407|gene15544|gene11983|gene5078|gene16171|gene15178|gene19987|gene7316|gene10215|gene18661|gene2087|gene13258|gene2668|gene15062|gene12815|gene2665|gene12791|gene2666|gene4965|gene2105|gene4080|gene11699|gene11894|gene7599|gene12556|gene11855|gene7519|gene4849|gene10183|gene16477|gene20014|gene5563|gene6346|gene14612|gene4298|gene2746|gene2815|gene8390|gene6455|gene14438|…	FGF13;COL4A6;IL6;LOC106044634;TRAF1;PIK3R3;FZD8;PML;LPAR2;GNAI1;IL2RA;FZD4;LOC1060300787;CXCL1258;LOC106030437;ABL1;RXRG;LOC106030435;FASLG;LOC106030436;JUN;ADCY5;MECOM;FGF9;ETS1;LOC106035885;RASSF5;WNT5A;IGF1;PDGFRB;LOC106038708;LOC106045698;FGFR4;FGF7;FN1;IL12RB2;HHIP;RUNX1T1;HEY1;IL5RA;GNA13;RUNX1;ITGA2;TCF7L2;RALGDS;AGTR1;FGF10;TRAF3;NOTCH2;LEF1;LAMB1;PLA2G4F2;LOC106029911;BDKRB1;CBLB;RET;ADC…
18	map05143	African trypanosomiasis	KEGG PATHWAY	18/2644	34/11318	0.000174054	0.00412757	Human Diseases	Infectious disease: parasitic	gene12814|gene20213|gene20665|gene11169|gene20397|gene20396|gene10829|gene14433|gene20398|gene2407|gene20399|gene5391|gene20401|gene13257|gene16801|gene11205|gene4601|gene12791	LOC106041602;IL1B;LOC106029527;IL18;LOC106049912;LOC106049916;VCAM1;LOC106043396;LOC106049913;IL6;LOC106049914;POLN1;LOC106049915;CXCL1257;PRKCB;LOC106039769;LAMA4;FASLG
25	map05144	Malaria	KEGG PATHWAY	25/2644	55/11318	0.000251288	0.00521422	Human Diseases	Infectious disease: parasitic	gene10829|gene13709|gene2407|gene17853|gene7029|gene4347|gene20213|gene11169|gene7321|gene8984|gene16782|gene18555|gene12755|gene19549|gene20823|gene5391|gene7318|gene15519|gene19080|gene19081|gene12814|gene3818|gene19271|gene19270|gene2370	VCAM1;CD81;IL6;CD40;SDC2;LOC106032265;IL1B;IL18;HGF;CD40LG;LOC106045971;COMP;LOC106041540;LRP1;LOC10603007823;POLN1;CD36;THBS2;LOC10602987880;LOC10602987881;LOC106041602;THBS1;PIK3AP171;PIK3AP170;ITGB2
24	map04612	Antigen processing and presentation	KEGG PATHWAY	24/2644	52/11318	0.000249708	0.00552688	Organismal Systems	Immune system	gene16782|gene12437|gene497|gene496|gene4734|gene20335|gene20337|gene4855|gene17700|gene18476|gene11109|gene16893|gene780|gene18088|gene20840|gene19271|gene19270|gene15892|gene20407|gene20405|gene20644|gene8833|gene20641|gene20642	LOC106045971;CIITA;CD8A;LOC106033965;HPSE234;LOC106049856;LOC106049848;CD74;HSP90AA1;NFKB276;HSPA8;NFYA;LGMN;B2M;LOC10603007840;PIK3AP171;PIK3AP170;LOC106044971;LOC106049920;LOC106049922;LOC106029505;HSPA2;LOC106029502;TAP2
37	map05322	Systemic lupus erythematosus	KEGG PATHWAY	37/2644	93/11318	0.000287879	0.00562212	Human Diseases	Immune disease	gene20665|gene16782|gene11984|gene17853|gene1583|gene1582|gene1587|gene19271|gene19270|gene9861|gene20338|gene1566|gene8984|gene20121|gene20120|gene1569|gene1568|gene20396|gene20397|gene14433|gene20398|gene20399|gene20840|gene20407|gene12427|gene1071|gene8002|gene18723|gene13178|gene1575|gene20401|gene1570|gene1571|gene20405|gene2313|gene18460|gene1578	LOC106029527;LOC106045971;C5;CD40;LOC1060481533;LOC1060481532;LOC1060481537;PIK3AP171;PIK3AP170;SNRPD1;LOC106049849;LOC106045814;CD40LG;LOC106049626;LOC106049629;LOC106045823;LOC106045117;LOC106049916;LOC106049912;LOC106043396;LOC106049913;LOC106049914;LOC10603007840;LOC106049920;GRIN2A;CD80;C7;LOC106048111;LOC106042035;LOC106045840;LOC106049915;LOC106045851;LOC106045128;LOC106049922;CD28;NFKB260…
15	map05310	Asthma	KEGG PATHWAY	15/2644	28/11318	0.000512289	0.00944888	Human Diseases	Immune disease	gene20396|gene20397|gene20665|gene14433|gene16782|gene20840|gene20398|gene20399|gene19271|gene19270|gene8984|gene20401|gene20407|gene20405|gene17853	LOC106049916;LOC106049912;LOC106029527;LOC106043396;LOC106045971;LOC10603007840;LOC106049913;LOC106049914;PIK3AP171;PIK3AP170;CD40LG;LOC106049915;LOC106049920;LOC106049922;CD40
49	map05418	Fluid shear stress and atherosclerosis	KEGG PATHWAY	49/2644	136/11318	0.000549415	0.0096003	Human Diseases	Cardiovascular disease	gene12268|gene15059|gene15614|gene3255|gene14183|gene10690|gene4965|gene3030|gene12209|gene8156|gene7584|gene7029|gene17850|gene12205|gene5078|gene20213|gene8503|gene7610|gene16763|gene13852|gene15338|gene3090|gene4973|gene12857|gene16188|gene17700|gene11550|gene17334|gene10829|gene12858|gene2668|gene2665|gene13588|gene15282|gene2666|gene12339|gene8965|gene12197|gene12814|gene10183|gene208|gene14…	ACVR2A;ASS1;LOC106044678;TRPV4;MMP2;GPC1;JUN;KDR;MGST2;MEF2A;HMOX1;SDC2;MMP9;SDC4;PIK3R3;IL1B;ACVR2B;BLNK10;ITGB3;DUSP1;PLAT;MGST1;PRKAA2;LOC106041672;NFKB1;HSP90AA1;NPPC;NQO1;VCAM1;IL1R2;LOC106030437;LOC106030435;LOC1060429688;PIK3CD;LOC106030436;NCF1;NOX1;SRC;LOC106041602;LOC106038708;LOC106030078;TXN;HSP90B1;SQSTM1;MEF2C;THBD;LOC106044971;LOC10604815371;FOS
29	map05140	Leishmaniasis	KEGG PATHWAY	29/2644	70/11318	0.000578855	0.00960899	Human Diseases	Infectious disease: parasitic	gene20665|gene4965|gene2296|gene4347|gene20213|gene9470|gene10253|gene14433|gene16188|gene20396|gene20397|gene5990|gene20823|gene13588|gene20398|gene20399|gene12339|gene20840|gene7598|gene13288|gene10304|gene12081|gene20401|gene20407|gene16801|gene20405|gene11333|gene18465|gene2370	LOC106029527;JUN;ITGA4;LOC106032265;IL1B;MARCKSL1;NFKBIA;LOC106043396;NFKB1;LOC106049916;LOC106049912;PTGS2;LOC10603007823;LOC1060429688;LOC106049913;LOC106049914;NCF1;LOC10603007840;NCF4;CXCL1288;FOS;EEF1A2;LOC106049915;LOC106049920;PRKCB;LOC106049922;STAT1;NFKB265;ITGB2
104	map04151	PI3K-Akt signaling pathway	KEGG PATHWAY	104/2644	339/11318	0.00102385	0.0147791	Environmental Information Processing	Signal transduction	gene20665|gene8973|gene18995|gene10062|gene2407|gene15544|gene5078|gene10590|gene6607|gene5780|gene19987|gene10215|gene18555|gene20396|gene13258|gene17377|gene20823|gene4973|gene12791|gene7292|gene20398|gene20399|gene7661|gene11699|gene19080|gene19081|gene7519|gene3818|gene4849|gene20014|gene6346|gene12662|gene2464|gene2296|gene9309|gene20084|gene4637|gene16763|gene7346|gene14433|gene7975|gene655…	LOC106029527;FGF13;CSF1;COL4A6;IL6;LOC106044634;PIK3R3;PPP2R3A;ITGB4;BDNF;LPAR2;IL2RA;COMP;LOC106049916;CXCL1258;COL6A6;LOC10603007823;PRKAA2;FASLG;RELN;LOC106049913;LOC106049914;BLNK61;FGF9;LOC10602987880;LOC10602987881;IGF1;THBS1;PDGFRB;FGFR4;FN1;YWHAG;CREB5;ITGA4;MTCP1;COL2A1;FOXO3;ITGB3;ITGA2;LOC106043396;FGF10;CHAD;LAMB1;PLA2G4F2;ITGA9;MAGI1;LAMA2;LAMB2;BLNK06;LOC10602987820;HSP90B1;F54;LOC1…
37	map04512	ECM-receptor interaction	KEGG PATHWAY	37/2644	98/11318	0.000937832	0.0148267	Environmental Information Processing	Signaling molecules and interaction	gene13591|gene8680|gene10062|gene8118|gene2296|gene12533|gene14670|gene20084|gene2150|gene12205|gene6607|gene6237|gene16763|gene7346|gene19308|gene19080|gene6331|gene19081|gene18555|gene6553|gene17377|gene13160|gene7292|gene10714|gene16356|gene7318|gene15519|gene4601|gene4508|gene3818|gene15124|gene1497|gene1496|gene15414|gene9134|gene19690|gene6346	LAMC2;TNC;COL4A6;SV2B;ITGA4;LAMB3;ITGA11;COL2A1;ITGB6;SDC4;ITGB4;HMMR;ITGB3;ITGA2;DAG1;LOC10602987880;COL6A3;LOC10602987881;COMP;CHAD;COL6A6;LAMB1;RELN;GP5;ITGA9;CD36;THBS2;LAMA4;LAMA2;THBS1;LAMB2;LOC106044451;CD44;LOC106044440;F54;EIF2AK20;FN1
67	map05166	Human T-cell leukemia virus 1 infection	KEGG PATHWAY	67/2644	203/11318	0.0010191	0.0153792	Human Diseases	Infectious disease: viral	gene4693|gene606|gene7841|gene13574|gene16782|gene2464|gene2720|gene4965|gene2407|gene5700|gene15653|gene2495|gene17853|gene6255|gene5032|gene5078|gene18816|gene9468|gene20337|gene11883|gene10098|gene10253|gene10215|gene19270|gene9948|gene1626|gene9821|gene16188|gene11894|gene9042|gene6012|gene2120|gene13864|gene16645|gene3340|gene16896|gene11186|gene11185|gene18088|gene2105|gene20840|gene7661|ge…	EGR1;MSX1;ETS2;CCNA2;LOC106045971;CREB5;CCNE2;JUN;IL6;TLN2;SRF;KAT2B;CD40;PTTG1;CDKN2C;PIK3R3;LOC106048210;LCK;LOC106049848;CHEK1;MAD2L1;NFKBIA;IL2RA;PIK3AP170;MYC;TNFRSF13C;NFATC1;NFKB1;ETS1;IL2RG;EVC22;LOC106029911;ERCC664;CCND3;ANAPC5;LOC106046185;CD3E;CD3D;B2M;ADCY5;LOC10603007840;BLNK61;LOC106045119;LOC106041672;NRP1;NFKB276;PSD92;IL1R2;PIK3CD;BUB1B;PIK3AP171;BLNK06;ADCY7;LOC106030078;FOS;NF…
38	map04380	Osteoclast differentiation	KEGG PATHWAY	38/2644	104/11318	0.0016336	0.0208599	Organismal Systems	Development and regeneration	gene11094|gene12857|gene18995|gene17471|gene13304|gene13457|gene4965|gene1227|gene2053|gene20213|gene6211|gene16763|gene6887|gene10253|gene8744|gene76|gene5078|gene9821|gene16188|gene19789|gene12442|gene15282|gene8965|gene13588|gene2120|gene12339|gene7598|gene16004|gene184|gene208|gene10304|gene16658|gene4840|gene9293|gene1439|gene20646|gene9468|gene11333	CALCR;LOC106041672;CSF1;SOCS3;LOC106042201;CAMK4;JUN;NFATC2;FOSL2;IL1B;LCP2;ITGB3;TNFSF11;NFKBIA;TRAF2;BLNK;PIK3R3;NFATC1;NFKB1;LOC10603419789;SOCS1;PIK3CD;NOX1;LOC1060429688;LOC106029911;NCF1;NCF4;SYK;NFKB2;LOC106030078;FOS;LOC106045892;SQSTM1;GPR1613;SPI1;LOC106029507;LCK;STAT1
33	map04658	Th1 and Th2 cell differentiation	KEGG PATHWAY	33/2644	87/11318	0.00157643	0.020935	Organismal Systems	Immune system	gene19270|gene2012|gene16782|gene4965|gene14612|gene18816|gene10253|gene10215|gene10230|gene9821|gene16188|gene6031|gene9042|gene700|gene12773|gene11186|gene11185|gene20840|gene18476|gene1052|gene18968|gene7606|gene208|gene10304|gene1227|gene19271|gene10220|gene9404|gene20407|gene20405|gene11335|gene9468|gene11333	PIK3AP170;NFKBIE;LOC106045971;JUN;IL12RB2;LOC106048210;NFKBIA;IL2RA;GATA3;NFATC1;NFKB1;MAML2;IL2RG;RBPJ;NOTCH2;CD3E;CD3D;LOC10603007840;NFKB276;CD247;ZAP70;BLNK06;LOC106030078;FOS;NFATC2;PIK3AP171;PRKCQ;RUNX3;LOC106049920;LOC106049922;STAT4;LCK;STAT1
62	map05202	Transcriptional misregulation in cancer	KEGG PATHWAY	62/2644	188/11318	0.00157167	0.0217415	Human Diseases	Cancer: overview	gene20665|gene11983|gene13574|gene16782|gene8797|gene2407|gene647|gene2746|gene968|gene15751|gene20089|gene17853|gene17850|gene18210|gene15178|gene14389|gene7713|gene9948|gene5032|gene14433|gene20146|gene14384|gene19270|gene15635|gene19016|gene9699|gene465|gene16188|gene19408|gene12933|gene16522|gene10560|gene1568|gene20396|gene20397|gene7519|gene16898|gene12357|gene2120|gene14438|gene20398|gene2…	LOC106029527;TRAF1;CCNA2;LOC106045971;SIX4;IL6;PROM1;RUNX1T1;NFKBIZ;BCL6;DDIT3;CD40;MMP9;MEF2C;PML;ARNT2;NR4A3;MYC;CDKN2C;LOC106043396;LOC106049641;BCL2A1;PIK3AP170;MEIS1;LOC10602987816;SUPT3H;PLAU;NFKB1;PAX5;HPGD;DOT1L;KLF3;LOC106045117;LOC106049916;LOC106049912;IGF1;BAK1;FLT3;LOC106029911;RUNX1;LOC106049913;LOC106049914;EYA1;PBX3;LOC106049915;PLAT;IL1R2;RXRG;ETV4;PIK3AP171;BLNK06;ZEB1;ERG;LOC10…
37	map04668	TNF signaling pathway	KEGG PATHWAY	37/2644	102/11318	0.00216405	0.0266098	Environmental Information Processing	Signal transduction	gene12292|gene11983|gene18995|gene17471|gene10829|gene2464|gene4965|gene2407|gene9326|gene3669|gene11543|gene17850|gene5078|gene6988|gene10253|gene8744|gene19572|gene16188|gene17686|gene20213|gene6007|gene3434|gene4565|gene15282|gene7661|gene11989|gene13765|gene12814|gene4749|gene208|gene10304|gene12853|gene4218|gene5182|gene5185|gene5990|gene1416	LOC106041040;TRAF1;CSF1;SOCS3;VCAM1;CREB5;JUN;IL6;FIGF;TRAF5;TNFRSF1B;MMP9;PIK3R3;CASP3;NFKBIA;TRAF2;LIF;NFKB1;TRAF3;IL1B;LOC106034136;PGAM5;TNFAIP3;PIK3CD;BLNK61;DAB2IP;MAP3K8;LOC106041602;IRF1;LOC106030078;FOS;IL18R1;MAP2K3;LOC106033293;LOC106033294;PTGS2;CREB3L1
64	map05169	Epstein-Barr virus infection	KEGG PATHWAY	64/2644	200/11318	0.0030333	0.0296193	Human Diseases	Infectious disease: viral	gene17686|gene20665|gene13574|gene16782|gene2720|gene4965|gene2407|gene1969|gene5624|gene2012|gene3669|gene17853|gene3889|gene5078|gene18816|gene20335|gene20337|gene10253|gene8744|gene14433|gene76|gene9948|gene16645|gene20641|gene16188|gene4565|gene700|gene20396|gene20397|gene11576|gene20823|gene16898|gene11186|gene11185|gene20398|gene18088|gene8025|gene20840|gene12557|gene16021|gene16004|gene434…	TRAF3;LOC106029527;CCNA2;LOC106045971;CCNE2;JUN;IL6;EIF2AK2;NEDD4;NFKBIE;TRAF5;CD40;IRF7;PIK3R3;LOC106048210;LOC106049856;LOC106049848;NFKBIA;TRAF2;LOC106043396;BLNK;MYC;CCND3;LOC106029502;NFKB1;TNFAIP3;RBPJ;LOC106049916;LOC106049912;DDX58;LOC10603007823;BAK1;CD3E;CD3D;LOC106049913;B2M;LOC106036387;LOC10603007840;IKBKE;LOC106045119;SYK;LOC106032265;PSD92;PIK3CD;CD247;CASP3;LOC106044451;CD44;NFKB2…
33	map04657	IL-17 signaling pathway	KEGG PATHWAY	33/2644	90/11318	0.00299896	0.0301713	Organismal Systems	Immune system	gene19639|gene4965|gene12557|gene19925|gene3669|gene17850|gene3340|gene6988|gene10253|gene8744|gene16188|gene17700|gene19640|gene19641|gene17686|gene20213|gene5597|gene4565|gene6009|gene2407|gene6007|gene4606|gene208|gene12638|gene10304|gene15129|gene7530|gene5182|gene5990|gene6006|gene9668|gene20646|gene19290	LOC106049125;JUN;IKBKE;TRAF4;TRAF5;MMP9;ANAPC5;CASP3;NFKBIA;TRAF2;NFKB1;HSP90AA1;LOC106049127;LOC106049124;TRAF3;IL1B;MAPK6;TNFAIP3;EVC9;IL6;LOC106034136;TRAF3IP2;LOC106030078;LOC106041491;FOS;LOC106044089;HSP90B1;LOC106033293;PTGS2;EVC6;LOC106038139;LOC106029507;PIK3AP190
24	map05321	Inflammatory bowel disease (IBD)	KEGG PATHWAY	24/2644	60/11318	0.00293184	0.0304178	Human Diseases	Immune disease	gene16782|gene4965|gene2407|gene14611|gene14612|gene4347|gene20213|gene11169|gene10230|gene16831|gene16188|gene9042|gene20823|gene3700|gene20840|gene11335|gene12852|gene12853|gene19271|gene19270|gene20407|gene20405|gene9821|gene11333	LOC106045971;JUN;IL6;IL23R;IL12RB2;LOC106032265;IL1B;IL18;GATA3;IL21R;NFKB1;IL2RG;LOC10603007823;TLR5;LOC10603007840;STAT4;IL18RAP;IL18R1;PIK3AP171;PIK3AP170;LOC106049920;LOC106049922;NFATC1;STAT1
39	map04666	Fc gamma R-mediated phagocytosis	KEGG PATHWAY	39/2644	111/11318	0.00322382	0.0305802	Organismal Systems	Immune system	gene11987|gene20665|gene3545|gene4102|gene12024|gene6629|gene14267|gene5078|gene1358|gene1359|gene7610|gene14041|gene9470|gene6216|gene14042|gene17812|gene1356|gene9061|gene20396|gene20397|gene14433|gene15282|gene19959|gene20398|gene4974|gene12339|gene16004|gene12312|gene1361|gene1360|gene1362|gene1364|gene20399|gene20401|gene13131|gene16801|gene11669|gene10022|gene10479	GSN;LOC106029527;LIMK2;PLD1;LOC106040731;SPHK1;LOC106043193;PIK3R3;LOC106042968;LOC106042978;BLNK10;CHST11;MARCKSL1;DOCK2;CHST12;HCK;PLA2G4F;SCIN;LOC106049916;LOC106049912;LOC106043396;PIK3CD;LOC106049445;LOC106049913;PPAP2B;NCF1;SYK;LIMK1;LOC106043002;LOC106042985;LOC106042972;LOC106040722;LOC106049914;LOC106049915;PTPRC;PRKCB;INPP5D;LOC106038521;LYN
26	map05217	Basal cell carcinoma	KEGG PATHWAY	26/2644	66/11318	0.00258147	0.0306089	Human Diseases	Cancer: specific types	gene12283|gene19671|gene3401|gene18661|gene11436|gene16171|gene13515|gene4772|gene4032|gene18485|gene2087|gene10796|gene10798|gene10159|gene13212|gene16898|gene8439|gene12509|gene11855|gene9629|gene17618|gene19020|gene16477|gene2357|gene11073|gene4298	FZD9;WNT4;FZD10;FZD4;WNT7A;FZD8;WNT11;HPSE272;TCF7L2;LOC106047829;LOC1060300787;WNT10A;WNT6;LEF1;CXCL1212;BAK1;WNT3A;WNT2B;WNT5A;FZD3;FZD2;LOC10602987820;LOC106045698;FZD7;FZD1;HHIP
54	map04062	Chemokine signaling pathway	KEGG PATHWAY	54/2644	163/11318	0.00272222	0.0311647	Organismal Systems	Immune system	gene9866|gene15614|gene11238|gene923|gene14127|gene19844|gene19845|gene5078|gene4789|gene18816|gene4637|gene20029|gene6216|gene10253|gene12998|gene17812|gene14267|gene132|gene16188|gene12638|gene16183|gene12292|gene9867|gene12290|gene556|gene10735|gene19959|gene9868|gene5926|gene16692|gene10970|gene7610|gene16801|gene9869|gene7316|gene12197|gene15282|gene12339|gene20461|gene2105|gene208|gene4906|…	CXCR6;LOC106044678;CXCR5;LOC106038263;BCAR1;LOC106049328;LOC106049327;PIK3R3;CXCL14;LOC106048210;FOXO3;PTK2B;DOCK2;NFKBIA;CCR4;HCK;LOC106043193;CXCL12;NFKB1;LOC106041491;PARD3;LOC106041040;XCR1;LOC106041041;GRK4;CXCR4;LOC106049445;LOC106038377;GNG5;LOC106045913;ADCY7;BLNK10;PRKCB;LOC106038356;GNAI1;SRC;PIK3CD;NCF1;ADRBK1;ADCY5;LOC106030078;ITK;PREX1;PXN;LOC106033293;LOC106033294;LOC106048600;LOC1…
38	map04659	Th17 cell differentiation	KEGG PATHWAY	38/2644	107/11318	0.00292277	0.0313019	Organismal Systems	Immune system	gene19270|gene2012|gene16782|gene4965|gene2407|gene14611|gene12857|gene18816|gene10253|gene10215|gene10230|gene16831|gene16188|gene17700|gene9042|gene11185|gene20213|gene1052|gene11186|gene2120|gene14438|gene20840|gene18476|gene12815|gene18968|gene7606|gene208|gene10304|gene18252|gene1227|gene19271|gene10220|gene20407|gene20405|gene14856|gene9821|gene9468|gene11333	PIK3AP170;NFKBIE;LOC106045971;JUN;IL6;IL23R;LOC106041672;LOC106048210;NFKBIA;IL2RA;GATA3;IL21R;NFKB1;HSP90AA1;IL2RG;CD3D;IL1B;CD247;CD3E;LOC106029911;RUNX1;LOC10603007840;NFKB276;RXRG;ZAP70;BLNK06;LOC106030078;FOS;IL1RAP;NFATC2;PIK3AP171;PRKCQ;LOC106049920;LOC106049922;RAG16;NFATC1;LCK;STAT1
14	map05332	Graft-versus-host disease	KEGG PATHWAY	14/2644	29/11318	0.00287813	0.0318513	Human Diseases	Immune disease	gene20213|gene20337|gene16782|gene20542|gene2407|gene19271|gene19270|gene20840|gene20407|gene20405|gene1071|gene2313|gene12791|gene20644	IL1B;LOC106049848;LOC106045971;PRF1;IL6;PIK3AP171;PIK3AP170;LOC10603007840;LOC106049920;LOC106049922;CD80;CD28;FASLG;LOC106029505
60	map04360	Axon guidance	KEGG PATHWAY	60/2644	187/11318	0.00375325	0.0346133	Organismal Systems	Development and regeneration	gene19394|gene15988|gene19671|gene3545|gene15614|gene20451|gene15079|gene19492|gene284|gene13572|gene11855|gene15187|gene5078|gene1040|gene7326|gene7610|gene1270|gene7316|gene13743|gene16625|gene19208|gene13928|gene7329|gene12312|gene132|gene19272|gene11465|gene13942|gene16183|gene15956|gene8549|gene15970|gene18452|gene15999|gene15062|gene17421|gene18485|gene10735|gene15801|gene4045|gene15383|gen…	LRRC4;LOC106045044;WNT4;LIMK2;LOC106044678;RHOD;NTNG2;SEMA4A;UNC5B;TRPC3;WNT5A;SEMA7A;PIK3R3;EPHA6;SEMA3E;BLNK10;BMP7;GNAI1;NRP1;SYT15;PIK3AP108;LOC106042805;SEMA3D;LIMK1;CXCL12;EPHB6;EPHA2;SEMA3G;PARD3;PLXNB1;PLXNC1;LOC106045060;NFKB252;SEMA4D;ABL1;NTN1;LOC106047829;CXCR4;LOC10604815301;ABLIM1;UNC5D;SEMA3C;EPHA5;BOC;LOC106031921;SRC;FZD3;PIK3CD;SEMA6D;PAK6;PARD6A;MYL9;NTN3;NFATC2;ABLIM2;PLXNA4;N…
43	map04110	Cell cycle	KEGG PATHWAY	43/2644	130/11318	0.00716484	0.062598	Cellular Processes	Cell growth and death	gene12269|gene7288|gene12662|gene18522|gene19020|gene2720|gene10599|gene6255|gene17183|gene5032|gene4697|gene13398|gene10098|gene9948|gene16810|gene5018|gene19150|gene3455|gene13574|gene9675|gene5173|gene7585|gene16645|gene3340|gene15062|gene10737|gene16499|gene8025|gene17512|gene16021|gene18392|gene10896|gene17757|gene349|gene9605|gene18007|gene20037|gene12165|gene9911|gene13228|gene5647|gene118…	LOC106041004;ORC5;YWHAG;SFN;LOC10602987820;CCNE2;ANAPC13;PTTG1;TFDP1;CDKN2C;LOC106032718;BUB1;MAD2L1;MYC;PLK1;ORC1;TTK;CDC45;CCNA2;MCM3;E2F4;MCM5;CCND3;ANAPC5;ABL1;MCM6;FZR1;LOC106036387;CDC25A;LOC106045119;PSD92;CDC7;BUB1B;CDK1;MCM2;CDC14B;CCNB3;WEE1;MCM4;CXCL1228;CCNB2;CHEK1;CDC20
57	map05203	Viral carcinogenesis	KEGG PATHWAY	57/2644	181/11318	0.00716418	0.064284	Human Diseases	Cancer: overview	gene11987|gene11983|gene12662|gene15614|gene13574|gene2464|gene2720|gene4965|gene1969|gene15653|gene3669|gene13264|gene1583|gene3889|gene5078|gene13265|gene18816|gene3569|gene20337|gene11883|gene8056|gene10253|gene8744|gene12998|gene1566|gene16645|gene16188|gene20121|gene6291|gene700|gene1568|gene17686|gene6988|gene5678|gene16898|gene15282|gene9868|gene9869|gene8025|gene7661|gene16553|gene16004|g…	GSN;TRAF1;YWHAG;LOC106044678;CCNA2;CREB5;CCNE2;JUN;EIF2AK2;SRF;TRAF5;CXCL1264;LOC1060481533;IRF7;PIK3R3;CXCL1265;LOC106048210;PXN;LOC106049848;CHEK1;PMAIP1;NFKBIA;TRAF2;CCR4;LOC106045814;CCND3;NFKB1;LOC106049626;HDAC4;RBPJ;LOC106045117;TRAF3;CASP3;GTF2A2;BAK1;PIK3CD;LOC106038377;LOC106038356;LOC106036387;BLNK61;GTF2E1;SYK;SRC;CDK1;NFKB2;KAT2B;LOC10602987820;LYN;LOC106042035;LOC106045851;LOC106045…
38	map04660	T cell receptor signaling pathway	KEGG PATHWAY	38/2644	113/11318	0.00821442	0.0699279	Organismal Systems	Immune system	gene19270|gene16487|gene15614|gene2012|gene16782|gene4965|gene497|gene496|gene5078|gene6211|gene10253|gene4181|gene8984|gene9821|gene16188|gene18476|gene2314|gene15282|gene11186|gene11185|gene17756|gene19959|gene15745|gene7668|gene13765|gene1052|gene18968|gene208|gene2315|gene10304|gene1227|gene19271|gene10220|gene13131|gene2313|gene4906|gene9468|gene18465	PIK3AP170;LOC106045683;LOC106044678;NFKBIE;LOC106045971;JUN;CD8A;LOC106033965;PIK3R3;LCP2;NFKBIA;CARD11;CD40LG;NFATC1;NFKB1;NFKB276;CTLA4;PIK3CD;CD3E;CD3D;PAK6;LOC106049445;PDCD1;BLNK68;MAP3K8;CD247;ZAP70;LOC106030078;LOC106030066;FOS;NFATC2;PIK3AP171;PRKCQ;PTPRC;CD28;ITK;LCK;NFKB265
14	map01040	Biosynthesis of unsaturated fatty acids	KEGG PATHWAY	14/2644	32/11318	0.00856137	0.0710594	Metabolism	Lipid metabolism	gene7393|gene1468|gene18932|gene18879|gene1541|gene19151|gene1542|gene172|gene5871|gene576|gene5749|gene8482|gene1336|gene17906	ELOVL7;HSD17B12;HSD17B4;ACTN29;LOC106044856;ELOVL4;LOC106044871;SCD;ELOVL1;ACOX3;FADS1;PLA1A2;LOC106042682;ACOT7
50	map04072	Phospholipase D signaling pathway	KEGG PATHWAY	50/2644	158/11318	0.0101881	0.0824989	Environmental Information Processing	Signal transduction	gene15854|gene20665|gene20397|gene1827|gene15544|gene4102|gene6629|gene5078|gene1358|gene1359|gene6455|gene20029|gene19987|gene15614|gene20398|gene15094|gene1356|gene6002|gene7870|gene15282|gene20396|gene13258|gene17468|gene12296|gene14433|gene11578|gene17397|gene12795|gene4974|gene16692|gene10970|gene17969|gene1362|gene5491|gene16004|gene1364|gene1361|gene1360|gene20038|gene14052|gene15263|gene4…	INSR;LOC106029527;LOC106049912;LOC106047885;LOC106044634;PLD1;SPHK1;PIK3R3;LOC106042968;LOC106042978;GNA13;PTK2B;LPAR2;LOC106044678;LOC106049913;RALGDS;PLA2G4F;EVC2;AGTR1;PIK3CD;LOC106049916;CXCL1258;CYTH1;LOC106041043;LOC106043396;DGKQ;GAB1;DNM3;PPAP2B;LOC106045913;ADCY7;DNM1;LOC106042972;CYTH3;SYK;LOC106040722;LOC106043002;LOC106042985;LOC106049530;LPAR4;LOC106044308;PDGFRB;ADCY5;LPAR1;AGT;LOC1…
50	map04145	Phagosome	KEGG PATHWAY	50/2644	158/11318	0.0101881	0.0824989	Cellular Processes	Transport and catabolism	gene16763|gene20665|gene20397|gene3373|gene16684|gene8686|gene4347|gene20335|gene20337|gene12566|gene7346|gene14247|gene14433|gene20146|gene8702|gene20401|gene8543|gene10772|gene18555|gene10561|gene20396|gene2574|gene12772|gene2571|gene2573|gene20823|gene13588|gene20398|gene20399|gene12339|gene20840|gene16758|gene7598|gene15519|gene19080|gene19081|gene6775|gene2944|gene3818|gene13288|gene9111|gen…	ITGB3;LOC106029527;LOC106049912;TCTN2;LOC106045884;ATP6V1G1;LOC106032265;LOC106049856;LOC106049848;RAB7B;ITGA2;ATP6V1B1;LOC106043396;LOC106049641;TUBB4B;LOC106049915;EEA1;MARCO;COMP;LOC106039090;LOC106049916;LOC106030346;SEC22B;LOC106030345;LOC106030347;LOC10603007823;LOC1060429688;LOC106049913;LOC106049914;NCF1;LOC10603007840;MRC2;NCF4;THBS2;LOC10602987880;LOC10602987881;TUBB6;ATP6V1C2;THBS1;CXC…
31	map04650	Natural killer cell mediated cytotoxicity	KEGG PATHWAY	31/2644	90/11318	0.0110363	0.0832737	Organismal Systems	Immune system	gene20665|gene19720|gene20542|gene4107|gene5078|gene6988|gene6211|gene7610|gene20029|gene9821|gene15282|gene20396|gene20397|gene14433|gene10078|gene12791|gene19959|gene19721|gene20399|gene20398|gene16004|gene20201|gene1052|gene18968|gene15263|gene9468|gene1227|gene20401|gene16801|gene18465|gene2370	LOC106029527;LOC10603419720;PRF1;TNFSF10;PIK3R3;CASP3;LCP2;BLNK10;PTK2B;NFATC1;PIK3CD;LOC106049916;LOC106049912;LOC106043396;SH2D1A;FASLG;LOC106049445;LOC10603419721;LOC106049914;LOC106049913;SYK;TNFRSF10B;CD247;ZAP70;LOC106044308;LCK;NFATC2;LOC106049915;PRKCB;NFKB265;ITGB2
33	map05222	Small cell lung cancer	KEGG PATHWAY	33/2644	97/11318	0.0109253	0.0843533	Human Diseases	Cancer: specific types	gene13591|gene11983|gene2720|gene10062|gene19925|gene3669|gene5078|gene6988|gene7346|gene8744|gene13160|gene9948|gene16188|gene17686|gene15124|gene16898|gene15282|gene15997|gene8025|gene12533|gene16021|gene2519|gene4601|gene4508|gene18392|gene12815|gene208|gene10253|gene19020|gene10080|gene9134|gene5990|gene6346	LAMC2;TRAF1;CCNE2;COL4A6;TRAF4;TRAF5;PIK3R3;CASP3;ITGA2;TRAF2;LAMB1;MYC;NFKB1;TRAF3;LAMB2;BAK1;PIK3CD;CKS2;LOC106036387;LAMB3;LOC106045119;RARB;LAMA4;LAMA2;PSD92;RXRG;LOC106030078;NFKBIA;LOC10602987820;XIAP;F54;PTGS2;FN1
32	map04620	Toll-like receptor signaling pathway	KEGG PATHWAY	32/2644	94/11318	0.0119526	0.0881839	Organismal Systems	Immune system	gene12292|gene3700|gene2407|gene17853|gene2836|gene3889|gene5078|gene20213|gene4347|gene10253|gene20146|gene16188|gene13649|gene19789|gene12638|gene10561|gene17686|gene12290|gene20823|gene15282|gene4965|gene12557|gene1071|gene13765|gene19459|gene208|gene10304|gene4218|gene5182|gene5185|gene11888|gene11333	LOC106041040;TLR5;IL6;CD40;LY96;IRF7;PIK3R3;IL1B;LOC106032265;NFKBIA;LOC106049641;NFKB1;LOC1060407229;LOC10603419789;LOC106041491;LOC106039090;TRAF3;LOC106041041;LOC10603007823;PIK3CD;JUN;IKBKE;CD80;MAP3K8;IRF5;LOC106030078;FOS;MAP2K3;LOC106033293;LOC106033294;TIRAP;STAT1
16	map04940	Type I diabetes mellitus	KEGG PATHWAY	16/2644	40/11318	0.0138854	0.100216	Human Diseases	Endocrine and metabolic disease	gene20213|gene4424|gene20337|gene19270|gene16782|gene20542|gene20644|gene19271|gene18710|gene20840|gene11359|gene20407|gene20405|gene1071|gene2313|gene12791	IL1B;CPE;LOC106049848;PIK3AP170;LOC106045971;PRF1;LOC106029505;PIK3AP171;GAD2;LOC10603007840;HSPD1;LOC106049920;LOC106049922;CD80;CD28;FASLG
81	map04010	MAPK signaling pathway	KEGG PATHWAY	81/2644	278/11318	0.0142615	0.100741	Environmental Information Processing	Signal transduction	gene15854|gene7046|gene1361|gene18995|gene13079|gene9570|gene3052|gene4965|gene3030|gene9326|gene15653|gene4218|gene13882|gene20089|gene8973|gene1360|gene9552|gene1359|gene7610|gene12661|gene7321|gene5780|gene18243|gene13729|gene4014|gene20146|gene1356|gene15359|gene8744|gene9948|gene9821|gene16955|gene18365|gene16188|gene13078|gene11465|gene6002|gene7975|gene2120|gene11109|gene17031|gene1358|gen…	INSR;STK3;LOC106043002;CSF1;EREG;FLNB;DUSP16;JUN;KDR;FIGF;SRF;MAP2K3;ERCC682;DDIT3;FGF13;LOC106042985;STMN1;LOC106042978;BLNK10;HSPB1;HGF;BDNF;FGF12;DUSP8;DUSP5;LOC106049641;PLA2G4F;FGFR1;TRAF2;MYC;NFATC1;LOC106046186;PSD65;NFKB1;AREG;EPHA2;EVC2;FGF10;LOC106029911;HSPA8;TGFA;LOC106042968;MECOM;CASP3;LOC106042972;STK4;PLA2G4F2;FASLG;FLT3;PTPN5;SIPA1L26;DUSP10;BLNK61;CACNA1H;FGF9;FGF7;MAP3K8;CACNA2…
25	map04664	Fc epsilon RI signaling pathway	KEGG PATHWAY	25/2644	71/11318	0.015793	0.109235	Organismal Systems	Immune system	gene20665|gene5078|gene1358|gene6211|gene7610|gene1356|gene20396|gene20397|gene14433|gene15282|gene19959|gene20398|gene20399|gene16004|gene1361|gene1360|gene1362|gene1364|gene1359|gene4218|gene9293|gene20401|gene11669|gene12380|gene10479	LOC106029527;PIK3R3;LOC106042968;LCP2;BLNK10;PLA2G4F;LOC106049916;LOC106049912;LOC106043396;PIK3CD;LOC106049445;LOC106049913;LOC106049914;SYK;LOC106043002;LOC106042985;LOC106042972;LOC106040722;LOC106042978;MAP2K3;GPR1613;LOC106049915;INPP5D;ALOX5AP;LYN
13	map00512	Mucin type O-glycan biosynthesis	KEGG PATHWAY	13/2644	31/11318	0.0166335	0.1127	Metabolism	Glycan biosynthesis and metabolism	gene4888|gene2478|gene12319|gene1204|gene6638|gene15423|gene19260|gene19356|gene2177|gene3782|gene13994|gene13993|gene16269	GALNT10;GALNT15;WBSCR17;B4GALT5;ST6GALNAC1;GCNT1;PIK3AP160;GALNT2;GALNT3;GALNT16;LOC106042924;GCNT4;TNFRSF13C9
44	map04550	Signaling pathways regulating pluripotency of stem cells	KEGG PATHWAY	44/2644	140/11318	0.0172091	0.114268	Cellular Processes	Cellular community - eukaryotes	gene12283|gene17344|gene19671|gene3401|gene15635|gene11436|gene19572|gene12268|gene3603|gene8014|gene5078|gene16171|gene13515|gene18816|gene8503|gene4772|gene16449|gene9948|gene18485|gene15359|gene18661|gene14887|gene10796|gene13967|gene10798|gene13212|gene13562|gene15282|gene8439|gene12509|gene16022|gene11855|gene9091|gene17618|gene7519|gene9629|gene8753|gene20014|gene2357|gene11073|gene530|gene…	FZD9;ZFHX3;WNT4;FZD10;MEIS1;WNT7A;LIF;ACVR2A;TBX3;LIFR;PIK3R3;FZD8;WNT11;LOC106048210;ACVR2B;HPSE272;OTX1;MYC;LOC106047829;FGFR1;FZD4;ACVR1C;WNT10A;INHBA;WNT6;CXCL1212;PLA2G4F2;PIK3CD;WNT3A;WNT2B;LOC106045127;WNT5A;DLX5;FZD2;IGF1;FZD3;LOC106037140;FGFR4;FZD7;FZD1;FGFR3;KLF4;JARID2;LOC106041693
8	map00061	Fatty acid biosynthesis	KEGG PATHWAY	8/2644	16/11318	0.0181304	0.118025	Metabolism	Lipid metabolism	gene3267|gene17252|gene4029|gene17498|gene10056|gene6985|gene18977|gene2523	ACACB;ACSF3;ACSL5;FASN;ACSL4;ACSL1;ACSBG2;OXSM
5	map00430	Taurine and hypotaurine metabolism	KEGG PATHWAY	5/2644	8/11318	0.0204142	0.127877	Metabolism	Metabolism of other amino acids	gene14372|gene3517|gene18710|gene18879|gene16291	GADL1;GGT1;GAD2;ACTN29;GGT7
45	map04310	Wnt signaling pathway	KEGG PATHWAY	45/2644	145/11318	0.0201978	0.128955	Environmental Information Processing	Signal transduction	gene12283|gene16220|gene19671|gene3401|gene18661|gene11436|gene4965|gene4941|gene12301|gene16686|gene16171|gene13515|gene16645|gene7610|gene15312|gene15614|gene4032|gene18485|gene9004|gene9948|gene9532|gene9821|gene4351|gene8439|gene10798|gene6012|gene1697|gene10159|gene16925|gene10796|gene12509|gene4772|gene13212|gene1814|gene10428|gene11855|gene7233|gene9629|gene19335|gene17618|gene15348|gene12…	FZD9;DKK2;WNT4;FZD10;FZD4;WNT7A;JUN;ROR1;RNF43;LGR6;FZD8;WNT11;CCND3;BLNK10;SFRP4;LOC106044678;TCF7L2;LOC106047829;GPC4;MYC;RSPO1;NFATC1;SFRP2;WNT3A;WNT6;EVC22;LGR5;LEF1;PPARD;WNT10A;WNT2B;HPSE272;CXCL1212;PRICKLE1;CTBP2;WNT5A;PRICKLE2;FZD3;SOST;FZD2;SFRP1;NFATC2;FZD7;FZD1;PRKCB
31	map04928	Parathyroid hormone synthesis, secretion and action	KEGG PATHWAY	31/2644	94/11318	0.0210977	0.129712	Organismal Systems	Endocrine system	gene4693|gene15614|gene2464|gene4102|gene8156|gene20082|gene8117|gene14895|gene6455|gene6887|gene15359|gene13840|gene10230|gene695|gene8116|gene7391|gene19335|gene10970|gene7661|gene14604|gene7316|gene12815|gene6562|gene2105|gene10304|gene19020|gene1416|gene18210|gene16801|gene6006|gene17531	EGR1;LOC106044678;CREB5;PLD1;MEF2A;VDR;LOC106036455;NR4A2;GNA13;TNFSF11;FGFR1;HBEGF;GATA3;SLC34A2;AKAP13;PDE4D;SOST;ADCY7;BLNK61;PDE4B;GNAI1;RXRG;LOC106034617;ADCY5;FOS;LOC10602987820;CREB3L1;MEF2C;PRKCB;EVC6;PTH1R
67	map05205	Proteoglycans in cancer	KEGG PATHWAY	67/2644	229/11318	0.0220184	0.132911	Human Diseases	Cancer: overview	gene12283|gene19671|gene10123|gene15614|gene18661|gene11436|gene14183|gene10690|gene3030|gene17618|gene7029|gene17850|gene12205|gene5078|gene16171|gene13515|gene6988|gene4347|gene16763|gene7321|gene7346|gene350|gene3401|gene9570|gene18485|gene15359|gene13840|gene9948|gene465|gene8439|gene13027|gene2265|gene15282|gene18344|gene17397|gene8539|gene1496|gene20823|gene13562|gene12791|gene10796|gene199…	FZD9;WNT4;ANK2;LOC106044678;FZD4;WNT7A;MMP2;GPC1;KDR;FZD2;SDC2;MMP9;SDC4;PIK3R3;FZD8;WNT11;CASP3;LOC106032265;ITGB3;HGF;ITGA2;ANK3;FZD10;FLNB;LOC106047829;FGFR1;HBEGF;MYC;PLAU;WNT3A;HPSE;PAPSS25;PIK3CD;LOC106047723;GAB1;DCN;CD44;LOC10603007823;PLA2G4F2;FASLG;WNT10A;LOC106049445;CBLB;WNT2B;CXCL1212;FZD3;WNT6;WNT5A;SRC;LOC106044308;IGF1;LOC106044451;THBS1;ANK1;LUM;HPSE2;FLNC;LOC10602987820;LOC10604…
60	map05163	Human cytomegalovirus infection	KEGG PATHWAY	60/2644	204/11318	0.0261156	0.14949	Human Diseases	Infectious disease: viral	gene11193|gene20029|gene15614|gene2464|gene18088|gene2407|gene14465|gene3669|gene12857|gene5182|gene5078|gene8117|gene8116|gene20213|gene20335|gene6455|gene16763|gene10253|gene8744|gene14127|gene132|gene9948|gene9821|gene16188|gene18392|gene12638|gene10735|gene12292|gene6988|gene12290|gene5990|gene16898|gene12791|gene5926|gene9869|gene16692|gene2105|gene7610|gene16021|gene8006|gene7316|gene12197|…	IL10RA;PTK2B;LOC106044678;CREB5;B2M;IL6;IL10RB;TRAF5;LOC106041672;LOC106033293;PIK3R3;LOC106036455;AKAP13;IL1B;LOC106049856;GNA13;ITGB3;NFKBIA;TRAF2;BCAR1;CXCL12;MYC;NFATC1;NFKB1;PSD92;LOC106041491;CXCR4;LOC106041040;CASP3;LOC106041041;PTGS2;BAK1;FASLG;GNG5;LOC106038356;LOC106045913;ADCY5;BLNK10;LOC106045119;PTGER4;GNAI1;SRC;LOC106049848;PIK3CD;LOC106038708;LOC106030078;LOC10602987820;MB21D1;GNAO…
64	map04015	Rap1 signaling pathway	KEGG PATHWAY	64/2644	219/11318	0.0253412	0.150237	Environmental Information Processing	Signal transduction	gene15854|gene19270|gene8973|gene18995|gene15614|gene16782|gene7164|gene5700|gene1853|gene9326|gene14127|gene4218|gene15359|gene8011|gene16609|gene6211|gene7610|gene16763|gene7321|gene1164|gene19987|gene6174|gene3030|gene15094|gene5078|gene6002|gene11465|gene5195|gene16183|gene8728|gene13258|gene18243|gene3857|gene13562|gene15282|gene19959|gene12427|gene2105|gene7238|gene11699|gene7312|gene18922|…	INSR;PIK3AP170;FGF13;CSF1;LOC106044678;LOC106045971;CNR1;TLN2;SIPA1L2;FIGF;BCAR1;MAP2K3;FGFR1;FYB;ADORA2B;LCP2;BLNK10;ITGB3;HGF;LOC106041081;LPAR2;ARAP3;KDR;RALGDS;PIK3R3;EVC2;EPHA2;PARD6A;PARD3;GRIN1;CXCL1258;FGF12;PRKD1;PLA2G4F2;PIK3CD;LOC106049445;GRIN2A;ADCY5;MAGI1;FGF9;MAGI2;SKAP1;RASSF5;GNAI1;ERCC673;SRC;IGF1;FGF10;LPAR4;THBS1;PDGFRB;LOC106038708;LPAR1;GNAO1;PIK3AP171;FGFR4;FGF7;PRKCB;LPAR5…
32	map04750	Inflammatory mediator regulation of TRP channels	KEGG PATHWAY	32/2644	99/11318	0.0258289	0.150442	Organismal Systems	Sensory system	gene8699|gene3255|gene18252|gene5078|gene1358|gene1359|gene1360|gene197|gene1356|gene15282|gene20213|gene8803|gene6855|gene11403|gene15729|gene745|gene13257|gene2105|gene8006|gene12197|gene1361|gene7519|gene1362|gene1364|gene10183|gene17596|gene16594|gene4218|gene12857|gene10220|gene16801|gene10970	LOC106037090;TRPV4;IL1RAP;PIK3R3;LOC106042968;LOC106042978;LOC106042985;LOC106034197;PLA2G4F;PIK3CD;IL1B;PRKCH;HTR2A;HRH1;HTR2B;BDKRB1;CXCL1257;ADCY5;PTGER4;SRC;LOC106043002;IGF1;LOC106042972;LOC106040722;LOC106038708;LOC106046904;TRPV3;MAP2K3;LOC106041672;PRKCQ;PRKCB;ADCY7
14	map04216	Ferroptosis	KEGG PATHWAY	14/2644	36/11318	0.0267973	0.150792	Cellular Processes	Cell growth and death	gene18788|gene13288|gene4029|gene1913|gene12219|gene7584|gene10056|gene6985|gene9378|gene18333|gene3210|gene18301|gene16186|gene10626	GPX4;CXCL1288;ACSL5;MAP1LC3C;SLC7A11;HMOX1;ACSL4;ACSL1;SAT1;CP;LOC106031011;PRNP;SLC39A8;TF
90	map05165	Human papillomavirus infection	KEGG PATHWAY	90/2644	321/11318	0.0278129	0.153898	Human Diseases	Infectious disease: viral	gene10062|gene12557|gene3373|gene5078|gene16171|gene10590|gene6607|gene14247|gene18661|gene700|gene18555|gene17377|gene12791|gene7292|gene11855|gene19080|gene19081|gene2944|gene3818|gene4849|gene3569|gene6346|gene2464|gene2296|gene2815|gene20084|gene16763|gene7346|gene4032|gene17686|gene12773|gene6553|gene13160|gene16356|gene7238|gene8006|gene4508|gene15124|gene6988|gene9629|gene19020|gene9134|ge…	COL4A6;IKBKE;TCTN2;PIK3R3;FZD8;PPP2R3A;ITGB4;ATP6V1B1;FZD4;RBPJ;COMP;COL6A6;FASLG;RELN;WNT5A;LOC10602987880;LOC10602987881;ATP6V1C2;THBS1;PDGFRB;PXN;FN1;CREB5;ITGA4;HEY1;COL2A1;ITGB3;ITGA2;TCF7L2;TRAF3;NOTCH2;CHAD;LAMB1;ITGA9;MAGI1;PTGER4;LAMA2;LAMB2;CASP3;FZD3;LOC10602987820;F54;FZD7;FZD1;LOC106029505;CREB3L1;FZD9;FZD10;CCNA2;CCNE2;LOC106049848;PPP2R3C;BLNK14;NFKB1;WNT10A;WNT6;PARD3;COL6A3;CXCL1…
18	map05204	Chemical carcinogenesis	KEGG PATHWAY	18/2644	50/11318	0.0296845	0.161562	Human Diseases	Cancer: overview	gene15194|gene2666|gene2668|gene12470|gene197|gene20701|gene12531|gene20702|gene4186|gene18846|gene12209|gene2665|gene5990|gene14975|gene1971|gene5961|gene3090|gene3683	LOC106044188;LOC106030436;LOC106030437;HPGDS;LOC106034197;LOC106029566;LOC106041294;LOC106029567;LOC106032071;LOC106048260;MGST2;LOC106030435;PTGS2;LOC1060444515;LOC1060341971;CCBL2;MGST1;EPHX1
14	map00980	Metabolism of xenobiotics by cytochrome P450	KEGG PATHWAY	14/2644	37/11318	0.0340905	0.168926	Metabolism	Xenobiotics biodegradation and metabolism	gene15194|gene2666|gene2668|gene12470|gene20701|gene20702|gene18846|gene12209|gene2665|gene14975|gene1971|gene12531|gene3090|gene3683	LOC106044188;LOC106030436;LOC106030437;HPGDS;LOC106029566;LOC106029567;LOC106048260;MGST2;LOC106030435;LOC1060444515;LOC1060341971;LOC106041294;MGST1;EPHX1
49	map05206	MicroRNAs in cancer	KEGG PATHWAY	49/2644	164/11318	0.0315821	0.169117	Human Diseases	Cancer: overview	gene17512|gene14361|gene15614|gene14662|gene2720|gene10060|gene13751|gene15402|gene11909|gene7584|gene17850|gene5078|gene4697|gene9552|gene1496|gene16763|gene7933|gene9948|gene465|gene16188|gene20276|gene6291|gene18392|gene2265|gene6988|gene12773|gene16801|gene15062|gene16898|gene15282|gene8439|gene12442|gene16021|gene1971|gene3818|gene7090|gene8680|gene1497|gene9629|gene4849|gene11327|gene19020|…	CDC25A;TRIM71;LOC106044678;KIF23;CCNE2;IRS4;ZEB1;IRS2;ST14;HMOX1;MMP9;PIK3R3;LOC106032718;STMN1;CD44;ITGB3;IRS1;MYC;PLAU;NFKB1;S1PR2;HDAC4;PSD92;PAPSS25;CASP3;NOTCH2;PRKCB;ABL1;BAK1;PIK3CD;WNT3A;SOCS1;LOC106045119;LOC1060341971;THBS1;ZFPM2;TNC;LOC106044451;FZD3;PDGFRB;SERPINB5;LOC10602987820;LOC106042836;LOC106046136;FGFR3;RECK;LOC1060458406;LOC106029353;PTGS2
11	map05020	Prion diseases	KEGG PATHWAY	11/2644	27/11318	0.0334047	0.170621	Human Diseases	Neurodegenerative disease	gene20213|gene4693|gene11984|gene12292|gene2407|gene12027|gene8620|gene5185|gene18301|gene8002|gene5182	IL1B;EGR1;C5;LOC106041040;IL6;HSPA5;NCAM2;LOC106033294;PRNP;C7;LOC106033293
32	map05215	Prostate cancer	KEGG PATHWAY	32/2644	101/11318	0.0340296	0.171179	Human Diseases	Cancer: specific types	gene2464|gene2720|gene13751|gene1942|gene17850|gene5078|gene4772|gene10253|gene15338|gene20236|gene4032|gene15359|gene465|gene16188|gene17700|gene17031|gene10159|gene15282|gene7661|gene16021|gene18392|gene12858|gene7519|gene16393|gene4849|gene7842|gene19020|gene7530|gene208|gene6002|gene6007|gene1416	CREB5;CCNE2;ZEB1;SRD5A2;MMP9;PIK3R3;HPSE272;NFKBIA;PLAT;INSRR;TCF7L2;FGFR1;PLAU;NFKB1;HSP90AA1;TGFA;LEF1;PIK3CD;BLNK61;LOC106045119;PSD92;IL1R2;IGF1;AR;PDGFRB;ERG;LOC10602987820;HSP90B1;LOC106030078;EVC2;LOC106034136;CREB3L1
38	map05162	Measles	KEGG PATHWAY	38/2644	123/11318	0.033007	0.171224	Human Diseases	Infectious disease: viral	gene16782|gene2720|gene4965|gene2407|gene1969|gene3889|gene5078|gene6988|gene4347|gene10253|gene10215|gene16645|gene16188|gene13649|gene9042|gene12791|gene11109|gene17686|gene18816|gene11576|gene20823|gene16898|gene4565|gene11185|gene19722|gene12557|gene15282|gene11186|gene20213|gene7606|gene208|gene10304|gene19271|gene19270|gene8833|gene2313|gene7825|gene11333	LOC106045971;CCNE2;JUN;IL6;EIF2AK2;IRF7;PIK3R3;CASP3;LOC106032265;NFKBIA;IL2RA;CCND3;NFKB1;LOC1060407229;IL2RG;FASLG;HSPA8;TRAF3;LOC106048210;DDX58;LOC10603007823;BAK1;TNFAIP3;CD3D;LOC10603419722;IKBKE;PIK3CD;CD3E;IL1B;BLNK06;LOC106030078;FOS;PIK3AP171;PIK3AP170;HSPA2;CD28;LOC106036132;STAT1
19	map04923	Regulation of lipolysis in adipocytes	KEGG PATHWAY	19/2644	54/11318	0.0329243	0.173506	Organismal Systems	Endocrine system	gene9602|gene15854|gene9769|gene3893|gene2105|gene7933|gene15282|gene8086|gene4411|gene10060|gene15495|gene15402|gene5990|gene2802|gene16663|gene10970|gene12192|gene7316|gene5078	MGLL;INSR;LOC106038244;PNPLA2;ADCY5;IRS1;PIK3CD;PLIN1;NPY1R;IRS4;TSHR;IRS2;PTGS2;LOC106030656;ADORA1;ADCY7;PDE3B;GNAI1;PIK3R3
66	map05130	Pathogenic Escherichia coli infection	KEGG PATHWAY	66/2644	231/11318	0.0371079	0.181174	Human Diseases	Infectious disease: bacterial	gene19675|gene20665|gene2468|gene4965|gene2407|gene17812|gene7638|gene12305|gene12308|gene20213|gene18771|gene6455|gene17769|gene17768|gene20397|gene10253|gene19987|gene18970|gene15614|gene17879|gene2585|gene6988|gene6379|gene16188|gene4107|gene20652|gene13022|gene20396|gene13258|gene17468|gene3261|gene15062|gene14433|gene16898|gene12791|gene20201|gene6562|gene20398|gene20399|gene19851|gene5491|g…	CLDN19;LOC106029527;WIPF3;JUN;IL6;HCK;BLNK38;LOC106041090;LOC106041034;IL1B;LOC106048174;GNA13;LOC106047052;LOC106047050;LOC106049912;NFKBIA;LPAR2;MYO1F;LOC106044678;LOC106047203;MYO6;CASP3;NCKAP1;NFKB1;TNFSF10;LOC106029514;FAM175A;LOC106049916;CXCL1258;CYTH1;MYO1H;ABL1;LOC106043396;BAK1;FASLG;TNFRSF10B;LOC106034617;LOC106049913;LOC106049914;CLDN10;CYTH3;CLDN20;MYO1D;LOC106047195;TUBB6;TUBB4B;LPA…
36	map04915	Estrogen signaling pathway	KEGG PATHWAY	36/2644	117/11318	0.0393802	0.184144	Organismal Systems	Endocrine system	gene2464|gene4965|gene7530|gene17850|gene5078|gene16933|gene13840|gene18597|gene18595|gene18594|gene18593|gene18591|gene20067|gene20068|gene20069|gene7691|gene11109|gene17031|gene14183|gene20066|gene15282|gene17700|gene2105|gene7661|gene7316|gene12197|gene5530|gene10183|gene10304|gene18743|gene14137|gene18599|gene8833|gene10970|gene18600|gene1416	CREB5;JUN;HSP90B1;MMP9;PIK3R3;TBC1D153;HBEGF;LOC106048008;LOC106048012;LOC106048010;LOC106047978;LOC106047977;KRT23;KRT20;LOC106049573;BLNK91;HSPA8;TGFA;MMP2;LOC106049570;PIK3CD;HSP90AA1;ADCY5;BLNK61;GNAI1;SRC;GPER1;LOC106038708;FOS;FKBP4;GNAO1;LOC106048011;HSPA2;ADCY7;LOC106047979;CREB3L1
15	map00140	Steroid hormone biosynthesis	KEGG PATHWAY	15/2644	41/11318	0.0389966	0.184955	Metabolism	Lipid metabolism	gene15194|gene1468|gene1619|gene197|gene19862|gene4186|gene17258|gene10519|gene1942|gene15761|gene1971|gene14975|gene5146|gene12531|gene14973	LOC106044188;HSD17B12;LOC106046243;LOC106034197;SULT2B1;LOC106032071;LOC106046522;LOC106039057;SRD5A2;HSD17B2;LOC1060341971;LOC1060444515;HSD11B2;LOC106041294;LOC106043981
49	map04390	Hippo signaling pathway	KEGG PATHWAY	49/2644	166/11318	0.0387435	0.186418	Environmental Information Processing	Signal transduction	gene16525|gene12009|gene7046|gene12662|gene3401|gene18661|gene13078|gene12283|gene16388|gene19671|gene16171|gene13515|gene16645|gene4772|gene9948|gene2646|gene4032|gene18485|gene12635|gene2087|gene10796|gene10798|gene5195|gene14962|gene16183|gene11436|gene19819|gene10159|gene13212|gene8920|gene2120|gene8439|gene12509|gene16029|gene15511|gene4522|gene11855|gene9629|gene15055|gene17618|gene1209|gen…	AMH;CRB2;STK3;YWHAG;FZD10;FZD4;AREG;FZD9;LOC106045529;WNT4;FZD8;WNT11;CCND3;HPSE272;MYC;BMP5;TCF7L2;LOC106047829;LOC106041489;LOC1060300787;WNT10A;WNT6;PARD6A;MOB1B;PARD3;WNT7A;SAV1;LEF1;CXCL1212;SMAD7;LOC106029911;WNT3A;WNT2B;LOC106045149;FRMD1;CTGF;WNT5A;FZD3;FRMD6;FZD2;SNAI1;BMP7;LOC106045698;FZD7;FZD1;TEAD1;LOC106046593;LOC106046592;ITGB2
22	map05133	Pertussis	KEGG PATHWAY	22/2644	66/11318	0.041814	0.190168	Human Diseases	Infectious disease: bacterial	gene11984|gene15614|gene4965|gene2407|gene12305|gene2836|gene20213|gene17769|gene17768|gene20338|gene20146|gene16188|gene19767|gene5733|gene7316|gene4749|gene6988|gene10183|gene10304|gene11888|gene18460|gene2370	C5;LOC106044678;JUN;IL6;LOC106041090;LY96;IL1B;LOC106047052;LOC106047050;LOC106049849;LOC106049641;NFKB1;LOC10603419767;SERPING1;GNAI1;IRF1;CASP3;LOC106038708;FOS;TIRAP;NFKB260;ITGB2
34	map05414	Dilated cardiomyopathy (DCM)	KEGG PATHWAY	34/2644	110/11318	0.0416788	0.192186	Human Diseases	Cardiovascular disease	gene20665|gene20397|gene19493|gene4209|gene2296|gene3016|gene14670|gene2150|gene6607|gene989|gene19308|gene7346|gene7322|gene11690|gene3842|gene20396|gene4899|gene14433|gene3348|gene20398|gene20399|gene2105|gene15538|gene16418|gene16356|gene4508|gene16763|gene7519|gene2286|gene13298|gene20401|gene16803|gene10970|gene16949	LOC106029527;LOC106049912;LMNA;LOC106032083;ITGA4;SGCB;ITGA11;ITGB6;ITGB4;MYH15;DAG1;ITGA2;CACNA2D1;SGCG;ACTC1;LOC106049916;SGCD;LOC106043396;LOC106031415;LOC106049913;LOC106049914;ADCY5;AGT;SLC8A1;ITGA9;LAMA2;ITGB3;IGF1;TTN;CXCL1298;LOC106049915;CACNG3;ADCY7;CACNA1S
16	map04978	Mineral absorption	KEGG PATHWAY	16/2644	45/11318	0.0436278	0.195735	Organismal Systems	Digestive system	gene19688|gene16632|gene12568|gene16397|gene14429|gene9335|gene11064|gene10093|gene11065|gene19273|gene16418|gene7584|gene2218|gene695|gene10626|gene20082	SLC46A1;ATP2B4;SLC26A9;HEPH;LOC106043382;S100G;STEAP1;LOC106038686;STEAP2;LOC106048722;SLC8A1;HMOX1;LOC106029992;SLC34A2;TF;VDR
19	map00590	Arachidonic acid metabolism	KEGG PATHWAY	19/2644	56/11318	0.0472373	0.209104	Metabolism	Lipid metabolism	gene1358|gene1359|gene1361|gene19950|gene12470|gene5015|gene197|gene20027|gene1356|gene4862|gene4837|gene4834|gene3225|gene1364|gene5990|gene11513|gene1360|gene3517|gene1362	LOC106042968;LOC106042978;LOC106043002;LOC106049439;HPGDS;GPX7;LOC106034197;EPHX2;PLA2G4F;GPX3;LOC106032815;LOC106032894;TBXAS1;LOC106040722;PTGS2;LOC106040243;LOC106042985;GGT1;LOC106042972
97	map04080	Neuroactive ligand-receptor interaction	KEGG PATHWAY	97/2644	357/11318	0.0496662	0.216963	Environmental Information Processing	Signaling molecules and interaction	gene17479|gene11984|gene18781|gene7164|gene15544|gene7410|gene4364|gene14089|gene9086|gene7368|gene8472|gene11311|gene7491|gene17316|gene20276|gene12521|gene13258|gene13257|gene4411|gene4724|gene13385|gene10346|gene12725|gene16663|gene16559|gene16609|gene1164|gene6855|gene7870|gene15495|gene10777|gene3342|gene15729|gene6792|gene745|gene15538|gene14165|gene8006|gene4021|gene4315|gene268|gene19987|…	GCGR;C5;GRIN3B;CNR1;LOC106044634;HTR1A;NPY2R;GRIN3A;TAC1;LOC106035576;CRHR2;MC4R;P2RY8;EDN2;S1PR2;LOC106041380;CXCL1258;CXCL1257;NPY1R;NR3C1;SSTR4;HTR5A;NTS;ADORA1;GPR156;ADORA2B;LOC106041081;HTR2A;AGTR1;TSHR;SCTR;LOC106031149;HTR2B;MC5R;BDKRB1;AGT;CREB3L15;PTGER4;ADRA2A;EDNRA;NPFFR1;LPAR2;PTGFR;CHRNA9;LOC106049633;CALCR;MTNR1A;LOC106035583;GRIA1;LOC1060298781;PRLR;SSTR2;CHRNA2;CHRNB3;BLNK91;PARD…
18	map00600	Sphingolipid metabolism	KEGG PATHWAY	18/2644	53/11318	0.0520499	0.224423	Metabolism	Lipid metabolism	gene190|gene15132|gene829|gene19078|gene230|gene18974|gene16929|gene10119|gene6629|gene7964|gene10638|gene13528|gene10163|gene3515|gene8261|gene4974|gene8160|gene15923	LOC106029878;ACER2;GALC;LOC10602987878;ASAH2;ACER1;SMPD2;UGT8;SPHK1;SGPP2;NEU4;ACER3;SGMS2;SMPD4;KCNK101;PPAP2B;CERS3;LOC106044958
16	map00565	Ether lipid metabolism	KEGG PATHWAY	16/2644	46/11318	0.0528583	0.224987	Metabolism	Lipid metabolism	gene1358|gene16891|gene1362|gene1361|gene1360|gene8850|gene6992|gene1359|gene1356|gene4974|gene4102|gene1364|gene10119|gene11513|gene9713|gene190	LOC106042968;CEPT1;LOC106042972;LOC106043002;LOC106042985;HHEX50;ENPP6;LOC106042978;PLA2G4F;PPAP2B;PLD1;LOC106040722;UGT8;LOC106040243;PLA2G7;LOC106029878
15	map05030	Cocaine addiction	KEGG PATHWAY	15/2644	43/11318	0.0582834	0.244938	Human Diseases	Substance dependence	gene6456|gene2464|gene5780|gene7316|gene18781|gene4965|gene12427|gene2105|gene7661|gene16188|gene14089|gene20646|gene16119|gene1416|gene8728	RGS9;CREB5;BDNF;GNAI1;GRIN3B;JUN;GRIN2A;ADCY5;BLNK61;NFKB1;GRIN3A;LOC106029507;SLC18A2;CREB3L1;GRIN1
50	map05168	Herpes simplex virus 1 infection	KEGG PATHWAY	50/2644	175/11318	0.0626964	0.26019	Human Diseases	Infectious disease: viral	gene12292|gene11984|gene17471|gene18088|gene2407|gene11964|gene19905|gene3669|gene3889|gene5078|gene6988|gene20335|gene15178|gene20337|gene16763|gene10253|gene8744|gene4855|gene10298|gene20253|gene16188|gene11125|gene19019|gene15282|gene17686|gene20213|gene17507|gene11576|gene20823|gene16898|gene12791|gene20840|gene12557|gene1969|gene16004|gene4347|gene3775|gene12197|gene15263|gene208|gene2596|ge…	LOC106041040;C5;SOCS3;B2M;IL6;CARD9;TJAP15;TRAF5;IRF7;PIK3R3;CASP3;LOC106049856;PML;LOC106049848;ITGB3;NFKBIA;TRAF2;CD74;EIF2B2;LOC106049745;NFKB1;POU2F3;LOC10602987819;PIK3CD;TRAF3;IL1B;LOC106046816;DDX58;LOC10603007823;BAK1;FASLG;LOC10603007840;IKBKE;EIF2AK2;SYK;LOC106032265;SRSF5;SRC;LOC106044308;LOC106030078;MB21D1;PVRL1;LOC106033293;LOC106033294;LOC106049920;LOC106049922;LOC106029505;LOC1060…
34	map05146	Amoebiasis	KEGG PATHWAY	34/2644	114/11318	0.0660387	0.270677	Human Diseases	Infectious disease: parasitic	gene16306|gene20665|gene12661|gene10062|gene2407|gene13591|gene4347|gene5078|gene6988|gene20213|gene20593|gene3800|gene13160|gene20146|gene16188|gene14433|gene20396|gene20397|gene12566|gene20823|gene15282|gene20398|gene20399|gene12533|gene4601|gene4508|gene12858|gene15124|gene12857|gene9134|gene20401|gene16801|gene6346|gene2370	LOC106045455;LOC106029527;HSPB1;COL4A6;IL6;LAMC2;LOC106032265;PIK3R3;CASP3;IL1B;LOC106029451;ARG2;LAMB1;LOC106049641;NFKB1;LOC106043396;LOC106049916;LOC106049912;RAB7B;LOC10603007823;PIK3CD;LOC106049913;LOC106049914;LAMB3;LAMA4;LAMA2;IL1R2;LAMB2;LOC106041672;F54;LOC106049915;PRKCB;FN1;ITGB2
13	map00982	Drug metabolism - cytochrome P450	KEGG PATHWAY	13/2644	37/11318	0.0710612	0.271176	Metabolism	Xenobiotics biodegradation and metabolism	gene12803|gene12802|gene2666|gene2668|gene12470|gene20701|gene20702|gene12780|gene18846|gene12209|gene2665|gene14975|gene3090	FMO3;LOC106041532;LOC106030436;LOC106030437;HPGDS;LOC106029566;LOC106029567;LOC106041531;LOC106048260;MGST2;LOC106030435;LOC1060444515;MGST1
32	map05145	Toxoplasmosis	KEGG PATHWAY	32/2644	107/11318	0.0704968	0.27215	Human Diseases	Infectious disease: parasitic	gene11193|gene12437|gene14465|gene13591|gene4218|gene17853|gene2836|gene4347|gene6988|gene10253|gene7316|gene13160|gene8984|gene16188|gene12442|gene11109|gene20823|gene9869|gene20840|gene9870|gene4601|gene4508|gene15124|gene208|gene10080|gene14137|gene9134|gene20407|gene20405|gene12533|gene8833|gene11333	IL10RA;CIITA;IL10RB;LAMC2;MAP2K3;CD40;LY96;LOC106032265;CASP3;NFKBIA;GNAI1;LAMB1;CD40LG;NFKB1;SOCS1;HSPA8;LOC10603007823;LOC106038356;LOC10603007840;LOC106038357;LAMA4;LAMA2;LAMB2;LOC106030078;XIAP;GNAO1;F54;LOC106049920;LOC106049922;LAMB3;HSPA2;STAT1
18	map05134	Legionellosis	KEGG PATHWAY	18/2644	55/11318	0.0723156	0.272827	Human Diseases	Infectious disease: bacterial	gene20213|gene6988|gene11359|gene11169|gene10253|gene20823|gene3700|gene2407|gene20146|gene12081|gene12772|gene12305|gene16188|gene2370|gene8833|gene4347|gene11109|gene184	IL1B;CASP3;HSPD1;IL18;NFKBIA;LOC10603007823;TLR5;IL6;LOC106049641;EEF1A2;SEC22B;LOC106041090;NFKB1;ITGB2;HSPA2;LOC106032265;HSPA8;NFKB2
41	map04630	Jak-STAT signaling pathway	KEGG PATHWAY	41/2644	141/11318	0.0674748	0.273191	Environmental Information Processing	Signal transduction	gene11193|gene17471|gene2407|gene7487|gene8032|gene14611|gene8030|gene8014|gene5078|gene8390|gene18816|gene9028|gene5402|gene19572|gene17587|gene13920|gene10215|gene16832|gene9948|gene16831|gene9415|gene9414|gene12442|gene9042|gene16946|gene16645|gene14465|gene15282|gene4849|gene7599|gene15263|gene7606|gene8990|gene19020|gene14612|gene9522|gene19161|gene11335|gene20501|gene18465|gene11333	IL10RA;SOCS3;IL6;LOC106035752;PRLR;IL23R;IL7R;LIFR;PIK3R3;IL5RA;LOC106048210;IL13RA2;HAUS32;LIF;STAM2;CISH;IL2RA;LOC106046046;MYC;IL21R;IL22RA1;IFNLR1;SOCS1;IL2RG;LOC106046136;CCND3;IL10RB;PIK3CD;PDGFRB;LOC106035885;LOC106044308;BLNK06;BOC0;LOC10602987820;IL12RB2;CSF3R;IL11RA;STAT4;LOC106029353;NFKB265;STAT1
11	map01523	Antifolate resistance	KEGG PATHWAY	11/2644	30/11318	0.0704558	0.275192	Human Diseases	Drug resistance: antineoplastic	gene20213|gene19688|gene208|gene2407|gene13059|gene4250|gene19904|gene170|gene16188|gene14460|gene11553	IL1B;SLC46A1;LOC106030078;IL6;ABCG2;SHMT1;TJAP14;LOC106049164;NFKB1;LOC106043431;MTHFR
15	map04623	Cytosolic DNA-sensing pathway	KEGG PATHWAY	15/2644	44/11318	0.0700144	0.280058	Organismal Systems	Immune system	gene12292|gene20213|gene12290|gene11169|gene10253|gene208|gene2596|gene2407|gene5182|gene5185|gene12305|gene16188|gene11576|gene12557|gene3889	LOC106041040;IL1B;LOC106041041;IL18;NFKBIA;LOC106030078;MB21D1;IL6;LOC106033293;LOC106033294;LOC106041090;NFKB1;DDX58;IKBKE;IRF7
15	map05219	Bladder cancer	KEGG PATHWAY	15/2644	44/11318	0.0700144	0.280058	Human Diseases	Cancer: specific types	gene16236|gene3818|gene19020|gene14183|gene16021|gene5711|gene13840|gene9948|gene17323|gene530|gene6009|gene17324|gene17850|gene12197|gene18392	DAPK1;THBS1;LOC10602987820;MMP2;LOC106045119;DAPK2;HBEGF;MYC;LOC106046592;FGFR3;EVC9;LOC106046593;MMP9;SRC;PSD92
12	map04960	Aldosterone-regulated sodium reabsorption	KEGG PATHWAY	12/2644	34/11318	0.0785926	0.293177	Organismal Systems	Excretory system	gene15854|gene4319|gene7519|gene18522|gene7933|gene15282|gene16816|gene4293|gene5146|gene18496|gene16801|gene5078	INSR;NR3C2;IGF1;SFN;IRS1;PIK3CD;SCNN1B;SLC9A3R2;HSD11B2;NFKB296;PRKCB;PIK3R3
35	map04670	Leukocyte transendothelial migration	KEGG PATHWAY	35/2644	120/11318	0.0827223	0.305153	Organismal Systems	Immune system	gene19675|gene15614|gene10829|gene14183|gene12556|gene2296|gene12308|gene17850|gene5078|gene11132|gene7610|gene7499|gene20029|gene7500|gene14127|gene132|gene6138|gene10735|gene3005|gene13588|gene15282|gene19959|gene19851|gene7598|gene7316|gene11872|gene15263|gene12339|gene16293|gene13288|gene3569|gene16801|gene3870|gene4906|gene2370	CLDN19;LOC106044678;VCAM1;MMP2;RASSF5;ITGA4;LOC106041034;MMP9;PIK3R3;THY1;BLNK10;CD99;PTK2B;XG;BCAR1;CXCL12;CLDN20;CXCR4;TXK;LOC1060429688;PIK3CD;LOC106049445;CLDN10;NCF4;GNAI1;ESAM;LOC106044308;NCF1;MYL9;CXCL1288;PXN;PRKCB;ARHGAP5;ITK;ITGB2
27	map05412	Arrhythmogenic right ventricular cardiomyopathy (ARVC)	KEGG PATHWAY	27/2644	90/11318	0.0879625	0.320918	Human Diseases	Cardiovascular disease	gene3016|gene4032|gene19493|gene2296|gene14670|gene2150|gene6607|gene4772|gene16763|gene7346|gene7322|gene9162|gene11690|gene9164|gene4899|gene10159|gene3172|gene3348|gene16356|gene16418|gene4508|gene19308|gene16949|gene13298|gene6673|gene16803|gene1887	SGCB;TCF7L2;LMNA;ITGA4;ITGA11;ITGB6;ITGB4;HPSE272;ITGB3;ITGA2;CACNA2D1;LOC106037565;SGCG;DSG2;SGCD;LEF1;PKP2;LOC106031415;ITGA9;SLC8A1;LAMA2;DAG1;CACNA1S;CXCL1298;DSP;CACNG3;ACTN2
42	map04150	mTOR signaling pathway	KEGG PATHWAY	42/2644	148/11318	0.0897883	0.324019	Environmental Information Processing	Signal transduction	gene15854|gene12283|gene11315|gene19671|gene6843|gene3401|gene18661|gene11436|gene9991|gene8686|gene5078|gene16171|gene13515|gene15282|gene16588|gene14247|gene7933|gene15614|gene18485|gene10796|gene10798|gene3414|gene13212|gene4973|gene18515|gene8439|gene4759|gene12509|gene8025|gene11855|gene17618|gene7519|gene9778|gene2944|gene9629|gene208|gene11395|gene8200|gene2357|gene11073|gene12086|gene16801	INSR;FZD9;RNF152;WNT4;CAB39L;FZD10;FZD4;WNT7A;DEPTOR;ATP6V1G1;PIK3R3;FZD8;WNT11;PIK3CD;ULK2;ATP6V1B1;IRS1;LOC106044678;LOC106047829;WNT10A;WNT6;ULK1;CXCL1212;PRKAA2;RPS6KA1;WNT3A;FNIP1;WNT2B;LOC106036387;WNT5A;FZD2;IGF1;PRR5;ATP6V1C2;FZD3;LOC106030078;LOC106040019;GRB10;FZD7;FZD1;LOC106040774;PRKCB
15	map00480	Glutathione metabolism	KEGG PATHWAY	15/2644	46/11318	0.0978929	0.328287	Metabolism	Metabolism of other amino acids	gene2941|gene18788|gene5015|gene12470|gene1388|gene2665|gene2666|gene4862|gene12209|gene16291|gene2935|gene9371|gene3517|gene3090|gene2668	ODC1;GPX4;GPX7;HPGDS;ERCC68;LOC106030435;LOC106030436;GPX3;MGST2;GGT7;RRM2;SMS;GGT1;MGST1;LOC106030437
4	map00981	Insect hormone biosynthesis	KEGG PATHWAY	4/2644	8/11318	0.0923015	0.329506	Metabolism	Metabolism of terpenoids and polyketides	gene20768|gene16586|gene16587|gene3295	LOC106029637;LOC106045763;LOC106045817;ALDH2
42	map05224	Breast cancer	KEGG PATHWAY	42/2644	149/11318	0.0978229	0.3314	Human Diseases	Cancer: specific types	gene12283|gene8973|gene3401|gene18661|gene11436|gene4965|gene2815|gene19671|gene5078|gene16171|gene13515|gene4772|gene6887|gene5563|gene4032|gene18485|gene15359|gene9948|gene8439|gene10798|gene7975|gene12773|gene10159|gene13212|gene16898|gene13562|gene15282|gene10796|gene12509|gene11699|gene18392|gene16021|gene11855|gene17618|gene7519|gene9629|gene184|gene10304|gene19020|gene18243|gene2357|gene11…	FZD9;FGF13;FZD10;FZD4;WNT7A;JUN;HEY1;WNT4;PIK3R3;FZD8;WNT11;HPSE272;TNFSF11;FGF7;TCF7L2;LOC106047829;FGFR1;MYC;WNT3A;WNT6;FGF10;NOTCH2;LEF1;CXCL1212;BAK1;PLA2G4F2;PIK3CD;WNT10A;WNT2B;FGF9;PSD92;LOC106045119;WNT5A;FZD2;IGF1;FZD3;NFKB2;FOS;LOC10602987820;FGF12;FZD7;FZD1
58	map05132	Salmonella infection	KEGG PATHWAY	58/2644	212/11318	0.0971576	0.332539	Human Diseases	Infectious disease: bacterial	gene15613|gene15614|gene9570|gene4965|gene2407|gene20146|gene17870|gene12305|gene2836|gene4347|gene17768|gene20213|gene4772|gene17769|gene10159|gene10253|gene8744|gene4218|gene3557|gene17879|gene2585|gene9948|gene6379|gene4032|gene16188|gene17700|gene4107|gene20652|gene12821|gene10561|gene6988|gene17468|gene12566|gene20823|gene3558|gene3559|gene20201|gene5491|gene3700|gene19119|gene11169|gene1415…	RHOB;LOC106044678;FLNB;JUN;IL6;LOC106049641;LOC106047195;LOC106041090;LY96;LOC106032265;LOC106047050;IL1B;HPSE272;LOC106047052;LEF1;NFKBIA;TRAF2;MAP2K3;LOC106031353;LOC106047203;MYO6;MYC;NCKAP1;TCF7L2;NFKB1;HSP90AA1;TNFSF10;LOC106029514;GCC2;LOC106039090;CASP3;CYTH1;RAB7B;LOC10603007823;LOC106031351;LOC106031352;TNFRSF10B;CYTH3;TLR5;RHOG;IL18;LOC106043112;MYL9;LOC106040731;LOC106030078;TXN;FLNC;D…
10	map00592	alpha-Linolenic acid metabolism	KEGG PATHWAY	10/2644	28/11318	0.0965127	0.333773	Metabolism	Lipid metabolism	gene1358|gene1359|gene1362|gene1361|gene1360|gene1356|gene11513|gene8482|gene576|gene1364	LOC106042968;LOC106042978;LOC106042972;LOC106043002;LOC106042985;PLA2G4F;LOC106040243;PLA1A2;ACOX3;LOC106040722
21	map04115	p53 signaling pathway	KEGG PATHWAY	21/2644	68/11318	0.0949354	0.335304	Cellular Processes	Cell growth and death	gene6988|gene19709|gene16645|gene9039|gene5647|gene8056|gene7519|gene18522|gene20037|gene4566|gene2720|gene19020|gene13175|gene2935|gene13228|gene3891|gene349|gene11327|gene11883|gene6036|gene3818	CASP3;LOC10603419709;CCND3;LOC106037440;CCNB2;PMAIP1;IGF1;SFN;CCNB3;LOC106032402;CCNE2;LOC10602987820;GTSE1;RRM2;CXCL1228;PIDD1;CDK1;SERPINB5;CHEK1;SESN3;THBS1
54	map05170	Human immunodeficiency virus 1 infection	KEGG PATHWAY	54/2644	196/11318	0.0961139	0.335893	Human Diseases	Infectious disease: viral	gene7955|gene19270|gene11543|gene4697|gene3545|gene16782|gene4965|gene4218|gene3669|gene4347|gene5078|gene5647|gene6988|gene20335|gene20337|gene20029|gene10253|gene8744|gene9821|gene16188|gene18476|gene10735|gene12791|gene20823|gene16898|gene11186|gene11185|gene5926|gene18088|gene7610|gene9869|gene7316|gene12312|gene15282|gene1052|gene17756|gene349|gene19271|gene10183|gene208|gene10304|gene11883|…	AP1S3;PIK3AP170;TNFRSF1B;LOC106032718;LIMK2;LOC106045971;JUN;MAP2K3;TRAF5;LOC106032265;PIK3R3;CCNB2;CASP3;LOC106049856;LOC106049848;PTK2B;NFKBIA;TRAF2;NFATC1;NFKB1;NFKB276;CXCR4;FASLG;LOC10603007823;BAK1;CD3E;CD3D;GNG5;B2M;BLNK10;LOC106038356;GNAI1;LIMK1;PIK3CD;CD247;PAK6;CDK1;PIK3AP171;LOC106038708;LOC106030078;FOS;CHEK1;CCNB3;MB21D1;GNAO1;NFATC2;PXN;WEE1;CXCL1228;PRKCB;LOC106029505;LOC106038357…
46	map05152	Tuberculosis	KEGG PATHWAY	46/2644	166/11318	0.108517	0.336708	Human Diseases	Infectious disease: bacterial	gene20396|gene20665|gene16487|gene20397|gene12437|gene2407|gene3373|gene11964|gene14465|gene11359|gene6629|gene2765|gene4347|gene20082|gene6988|gene20213|gene11169|gene11333|gene4855|gene20823|gene20146|gene8543|gene16188|gene5106|gene10561|gene11193|gene2574|gene16893|gene2571|gene2573|gene14433|gene20398|gene20399|gene20840|gene16758|gene15614|gene16004|gene12197|gene14154|gene10183|gene20401|g…	LOC106049916;LOC106029527;LOC106045683;LOC106049912;CIITA;IL6;TCTN2;CARD9;IL10RB;HSPD1;SPHK1;RIPK2;LOC106032265;VDR;CASP3;IL1B;IL18;STAT1;CD74;LOC10603007823;LOC106049641;EEA1;NFKB1;PLK3;LOC106039090;IL10RA;LOC106030346;NFYA;LOC106030345;LOC106030347;LOC106043396;LOC106049913;LOC106049914;LOC10603007840;MRC2;LOC106044678;SYK;SRC;LOC106043112;LOC106038708;LOC106049915;LOC106049920;TIRAP;LOC1060499…
26	map04610	Complement and coagulation cascades	KEGG PATHWAY	26/2644	88/11318	0.107527	0.336784	Organismal Systems	Immune system	gene11984|gene13258|gene18698|gene6683|gene10862|gene18695|gene15338|gene20338|gene17170|gene465|gene3476|gene12730|gene12732|gene5733|gene11570|gene913|gene19609|gene745|gene8002|gene20760|gene13386|gene19513|gene19690|gene18460|gene20137|gene2370	C5;CXCL1258;LOC106048077;F13A1;F3;LOC106048078;PLAT;LOC106049849;F10;PLAU;SERPIND1;LOC106041557;CFH;SERPING1;STK40;F5;LOC106049106;BDKRB1;C7;LOC106029629;THBD;LOC106048983;EIF2AK20;NFKB260;LOC106049633;ITGB2
22	map04920	Adipocytokine signaling pathway	KEGG PATHWAY	22/2644	73/11318	0.110529	0.339773	Organismal Systems	Endocrine system	gene11543|gene17471|gene10060|gene15402|gene10253|gene8744|gene7933|gene6985|gene18977|gene2012|gene16188|gene679|gene3267|gene4973|gene10056|gene4029|gene7318|gene3131|gene12815|gene15263|gene208|gene10220	TNFRSF1B;SOCS3;IRS4;IRS2;NFKBIA;TRAF2;IRS1;ACSL1;ACSBG2;NFKBIE;NFKB1;PPARGC1A;ACACB;PRKAA2;ACSL4;ACSL5;CD36;DNA21;RXRG;LOC106044308;LOC106030078;PRKCQ
17	map04913	Ovarian steroidogenesis	KEGG PATHWAY	17/2644	54/11318	0.107504	0.339918	Organismal Systems	Endocrine system	gene15194|gene15854|gene1360|gene1364|gene1359|gene5990|gene1356|gene1358|gene1361|gene2105|gene1362|gene15761|gene7519|gene1971|gene10970|gene1336|gene14211	LOC106044188;INSR;LOC106042985;LOC106040722;LOC106042978;PTGS2;PLA2G4F;LOC106042968;LOC106043002;ADCY5;LOC106042972;HSD17B2;IGF1;LOC1060341971;ADCY7;LOC106042682;LHCGR
9	map00040	Pentose and glucuronate interconversions	KEGG PATHWAY	9/2644	25/11318	0.107198	0.34221	Metabolism	Carbohydrate metabolism	gene16452|gene8506|gene18098|gene14975|gene12624|gene3103|gene9051|gene3107|gene10570	UGP2;XYLB;SORD;LOC1060444515;GUSB;LOC106030914;ISPD;LOC106030918;UGDH
24	map04146	Peroxisome	KEGG PATHWAY	24/2644	80/11318	0.103141	0.342427	Cellular Processes	Transport and catabolism	gene12649|gene7675|gene15295|gene10595|gene5420|gene18932|gene16708|gene18879|gene20027|gene6985|gene5292|gene1504|gene14753|gene11084|gene8482|gene10056|gene2473|gene2647|gene16969|gene7215|gene4620|gene4029|gene20117|gene576	PEX12;BLNK75;PEX14;EHHADH;MPV17L;HSD17B4;PECR;ACTN29;EPHX2;ACSL1;NUDT7;CAT;NUDT12;PEX1;PLA1A2;ACSL4;HACL1;HMGCLL1;PHYH;ACOX2;DDO;ACSL5;LOC106049619;ACOX3
24	map04914	Progesterone-mediated oocyte maturation	KEGG PATHWAY	24/2644	80/11318	0.103141	0.342427	Organismal Systems	Endocrine system	gene18084|gene17512|gene4697|gene13574|gene10599|gene5078|gene5647|gene13398|gene10098|gene16810|gene17700|gene18515|gene3340|gene15282|gene16499|gene2105|gene12192|gene7316|gene7519|gene349|gene1261|gene10970|gene20037|gene13228	CPEB1;CDC25A;LOC106032718;CCNA2;ANAPC13;PIK3R3;CCNB2;BUB1;MAD2L1;PLK1;HSP90AA1;RPS6KA1;ANAPC5;PIK3CD;FZR1;ADCY5;PDE3B;GNAI1;IGF1;CDK1;AURKA;ADCY7;CCNB3;CXCL1228
42	map05226	Gastric cancer	KEGG PATHWAY	42/2644	150/11318	0.106325	0.342718	Human Diseases	Cancer: specific types	gene12283|gene8973|gene3401|gene18661|gene11436|gene2720|gene19671|gene5078|gene16171|gene13515|gene4772|gene7321|gene5563|gene4032|gene18485|gene9948|gene10796|gene10798|gene7975|gene15282|gene17397|gene10159|gene13212|gene16898|gene13562|gene2120|gene8439|gene12509|gene11699|gene18392|gene16021|gene2519|gene11855|gene17618|gene12815|gene9629|gene19020|gene18243|gene2357|gene11073|gene17324|gene…	FZD9;FGF13;FZD10;FZD4;WNT7A;CCNE2;WNT4;PIK3R3;FZD8;WNT11;HPSE272;HGF;FGF7;TCF7L2;LOC106047829;MYC;WNT10A;WNT6;FGF10;PIK3CD;GAB1;LEF1;CXCL1212;BAK1;PLA2G4F2;LOC106029911;WNT3A;WNT2B;FGF9;PSD92;LOC106045119;RARB;WNT5A;FZD2;RXRG;FZD3;LOC10602987820;FGF12;FZD7;FZD1;LOC106046593;LOC106046592
11	map04392	Hippo signaling pathway - multiple species	KEGG PATHWAY	11/2644	32/11318	0.105792	0.344343	Environmental Information Processing	Signal transduction	gene7046|gene15511|gene15055|gene13549|gene12635|gene16388|gene18300|gene19819|gene4355|gene14962|gene12140	STK3;FRMD1;FRMD6;FAT4;LOC106041489;LOC106045529;RASSF2;SAV1;DCHS2;MOB1B;TEAD1
10	map04977	Vitamin digestion and absorption	KEGG PATHWAY	10/2644	29/11318	0.117812	0.358841	Organismal Systems	Digestive system	gene20385|gene19688|gene19882|gene6186|gene11034|gene914|gene7925|gene6070|gene11205|gene5091	SLC5A6;SLC46A1;SLC52A3;SLC23A1;LOC106039631;SLC19A2;LOC106036180;LOC106034162;LOC106039769;MMACHC
35	map05034	Alcoholism	KEGG PATHWAY	35/2644	124/11318	0.120082	0.359163	Human Diseases	Substance dependence	gene2464|gene13457|gene14089|gene1583|gene1582|gene16119|gene1587|gene16609|gene12691|gene5780|gene1566|gene20121|gene20120|gene1569|gene1568|gene8728|gene18781|gene5926|gene12427|gene2105|gene16250|gene7661|gene6291|gene7316|gene2822|gene10183|gene18723|gene14137|gene13178|gene1575|gene1570|gene1571|gene20646|gene1578|gene1416	CREB5;CAMK4;GRIN3A;LOC1060481533;LOC1060481532;SLC18A2;LOC1060481537;ADORA2B;CAMKK1;BDNF;LOC106045814;LOC106049626;LOC106049629;LOC106045823;LOC106045117;GRIN1;GRIN3B;GNG5;GRIN2A;ADCY5;NTRK2;BLNK61;HDAC4;GNAI1;PKIA;LOC106038708;LOC106048111;GNAO1;LOC106042035;LOC106045840;LOC106045851;LOC106045128;LOC106029507;LOC106045890;CREB3L1
8	map00531	Glycosaminoglycan degradation	KEGG PATHWAY	8/2644	22/11318	0.119284	0.360021	Metabolism	Glycan biosynthesis and metabolism	gene12624|gene47|gene9245|gene13912|gene6928|gene11773|gene13027|gene1752	GUSB;HPSE2;IDS;LOC106042799;HGSNAT;IDUA;HPSE;GNS
29	map04916	Melanogenesis	KEGG PATHWAY	29/2644	101/11318	0.12444	0.368877	Organismal Systems	Endocrine system	gene12283|gene19671|gene3401|gene18661|gene11436|gene16171|gene13515|gene4772|gene11855|gene4032|gene18485|gene18170|gene10796|gene10798|gene10159|gene13212|gene8439|gene12509|gene2105|gene7316|gene9629|gene17618|gene10183|gene14137|gene2357|gene11073|gene16801|gene10970|gene1416	FZD9;WNT4;FZD10;FZD4;WNT7A;FZD8;WNT11;HPSE272;WNT5A;TCF7L2;LOC106047829;LOC106047519;WNT10A;WNT6;LEF1;CXCL1212;WNT3A;WNT2B;ADCY5;GNAI1;FZD3;FZD2;LOC106038708;GNAO1;FZD7;FZD1;PRKCB;ADCY7;CREB3L1
11	map05216	Thyroid cancer	KEGG PATHWAY	11/2644	33/11318	0.126714	0.372293	Human Diseases	Cancer: specific types	gene12815|gene4772|gene19020|gene10159|gene16898|gene353|gene4032|gene421|gene9948|gene17324|gene17323	RXRG;HPSE272;LOC10602987820;LEF1;BAK1;CCDC6;TCF7L2;RET;MYC;LOC106046593;LOC106046592
29	map04625	C-type lectin receptor signaling pathway	KEGG PATHWAY	29/2644	102/11318	0.136752	0.398261	Organismal Systems	Immune system	gene16487|gene15614|gene13304|gene4965|gene2407|gene11964|gene12305|gene5078|gene20213|gene17769|gene17768|gene10253|gene9821|gene16188|gene15282|gene12557|gene16004|gene12197|gene5106|gene4749|gene15263|gene10183|gene208|gene184|gene1227|gene5182|gene5990|gene17067|gene11333	LOC106045683;LOC106044678;LOC106042201;JUN;IL6;CARD9;LOC106041090;PIK3R3;IL1B;LOC106047052;LOC106047050;NFKBIA;NFATC1;NFKB1;PIK3CD;IKBKE;SYK;SRC;PLK3;IRF1;LOC106044308;LOC106038708;LOC106030078;NFKB2;NFATC2;LOC106033293;PTGS2;LOC106046287;STAT1
2	map00780	Biotin metabolism	KEGG PATHWAY	2/2644	3/11318	0.138198	0.398971	Metabolism	Metabolism of cofactors and vitamins	gene7855|gene2523	HLCS;OXSM
6	map00120	Primary bile acid biosynthesis	KEGG PATHWAY	6/2644	16/11318	0.148653	0.425456	Metabolism	Lipid metabolism	gene7215|gene18932|gene18879|gene10519|gene120|gene9710	ACOX2;HSD17B4;ACTN29;LOC106039057;CH25H;LOC106038153
36	map04217	Necroptosis	KEGG PATHWAY	36/2644	131/11318	0.154574	0.438619	Cellular Processes	Cell growth and death	gene8697|gene14429|gene13304|gene1969|gene12305|gene3669|gene1582|gene1587|gene1358|gene1359|gene20213|gene17769|gene17768|gene8744|gene1356|gene17700|gene20120|gene1569|gene18816|gene3434|gene4565|gene12791|gene3696|gene1364|gene1361|gene1360|gene1362|gene20201|gene13288|gene18723|gene10080|gene4840|gene1575|gene11335|gene11333|gene4107	LOC106037044;LOC106043382;LOC106042201;EIF2AK2;LOC106041090;TRAF5;LOC1060481532;LOC1060481537;LOC106042968;LOC106042978;IL1B;LOC106047052;LOC106047050;TRAF2;PLA2G4F;HSP90AA1;LOC106049629;LOC106045823;LOC106048210;PGAM5;TNFAIP3;FASLG;CAPN2;LOC106040722;LOC106043002;LOC106042985;LOC106042972;TNFRSF10B;CXCL1288;LOC106048111;XIAP;SQSTM1;LOC106045840;STAT4;STAT1;TNFSF10
9	map00601	Glycosphingolipid biosynthesis - lacto and neolacto series	KEGG PATHWAY	9/2644	27/11318	0.15844	0.445779	Metabolism	Glycan biosynthesis and metabolism	gene6041|gene9722|gene8754|gene16443|gene9754|gene3320|gene4154|gene862|gene863	FUT4;ST8SIA1;FUT7;B3GNT2;A4GALT;B3GNT4;B3GNT5;B4GALT4;B4GALT3
57	map04810	Regulation of actin cytoskeleton	KEGG PATHWAY	57/2644	216/11318	0.163175	0.447719	Cellular Processes	Cell motility	gene11987|gene19498|gene8973|gene10674|gene15614|gene1901|gene12024|gene2296|gene11683|gene14670|gene2150|gene5078|gene6607|gene6455|gene16763|gene7346|gene19987|gene16625|gene20236|gene14127|gene10996|gene132|gene6379|gene6002|gene3545|gene20652|gene7975|gene10440|gene9061|gene13258|gene18243|gene13562|gene10735|gene745|gene19959|gene16356|gene7610|gene15359|gene11699|gene12312|gene12197|gene152…	GSN;LOC106048962;FGF13;ARHGEF4;LOC106044678;LOC1060298781;LOC106040731;ITGA4;SPATA13;ITGA11;ITGB6;PIK3R3;ITGB4;GNA13;ITGB3;ITGA2;LPAR2;SYT15;INSRR;BCAR1;MYLK3;CXCL12;NCKAP1;EVC2;LIMK2;LOC106029514;FGF10;DOCK1;SCIN;CXCL1258;FGF12;PLA2G4F2;CXCR4;BDKRB1;LOC106049445;ITGA9;BLNK10;FGFR1;FGF9;LIMK1;SRC;PIK3CD;PAK6;LPAR4;MYL9;PDGFRB;LPAR1;DIAPH3;PXN;FGFR4;FGF7;MYLK4;FGFR3;LPAR5;FN1;CYFIP2;ITGB2
58	map04510	Focal adhesion	KEGG PATHWAY	58/2644	220/11318	0.162753	0.450283	Cellular Processes	Cellular community - eukaryotes	gene13591|gene15614|gene15124|gene10062|gene5700|gene2296|gene9326|gene12533|gene14670|gene20084|gene2150|gene5078|gene6607|gene9134|gene7610|gene16763|gene7321|gene7346|gene9570|gene14127|gene16645|gene4508|gene6331|gene3696|gene10440|gene18555|gene8680|gene6553|gene17377|gene13160|gene15282|gene7292|gene4965|gene16356|gene16801|gene15519|gene16293|gene3030|gene4601|gene10996|gene19080|gene19081…	LAMC2;LOC106044678;LAMB2;COL4A6;TLN2;ITGA4;FIGF;LAMB3;ITGA11;COL2A1;ITGB6;PIK3R3;ITGB4;F54;BLNK10;ITGB3;HGF;ITGA2;FLNB;BCAR1;CCND3;LAMA2;COL6A3;CAPN2;DOCK1;COMP;TNC;CHAD;COL6A6;LAMB1;PIK3CD;RELN;JUN;ITGA9;PRKCB;THBS2;MYL9;KDR;LAMA4;MYLK3;LOC10602987880;LOC10602987881;IGF1;PAK6;SRC;THBS1;PDGFRB;PARVB;RASGRF1;FLNC;XIAP;PXN;EVC2;MYLK4;LOC106049445;EIF2AK20;FN1;ARHGAP5
10	map00591	Linoleic acid metabolism	KEGG PATHWAY	10/2644	31/11318	0.167423	0.451907	Metabolism	Lipid metabolism	gene1358|gene1359|gene1360|gene1361|gene197|gene4186|gene1356|gene1362|gene11513|gene1364	LOC106042968;LOC106042978;LOC106042985;LOC106043002;LOC106034197;LOC106032071;PLA2G4F;LOC106042972;LOC106040243;LOC106040722
13	map00071	Fatty acid degradation	KEGG PATHWAY	13/2644	42/11318	0.162377	0.453019	Metabolism	Lipid metabolism	gene8482|gene20701|gene10056|gene20702|gene16586|gene16587|gene3295|gene6985|gene4029|gene20768|gene18977|gene10595|gene576	PLA1A2;LOC106029566;ACSL4;LOC106029567;LOC106045763;LOC106045817;ALDH2;ACSL1;ACSL5;LOC106029637;ACSBG2;EHHADH;ACOX3
41	map04934	Cushing syndrome	KEGG PATHWAY	41/2644	152/11318	0.167318	0.455326	Human Diseases	Endocrine and metabolic disease	gene12283|gene19671|gene10740|gene3401|gene18661|gene11436|gene2464|gene2720|gene4109|gene5032|gene16171|gene13515|gene4772|gene8472|gene7316|gene4032|gene18485|gene18365|gene8439|gene10798|gene18392|gene10159|gene13212|gene7870|gene12509|gene10970|gene15538|gene7661|gene4257|gene16021|gene11855|gene9629|gene4233|gene17618|gene2105|gene19020|gene10796|gene2357|gene11073|gene16949|gene1416	FZD9;WNT4;LOC106039340;FZD10;FZD4;WNT7A;CREB5;CCNE2;NCEH1;CDKN2C;FZD8;WNT11;HPSE272;CRHR2;GNAI1;TCF7L2;LOC106047829;PSD65;WNT3A;WNT6;PSD92;LEF1;CXCL1212;AGTR1;WNT2B;ADCY7;AGT;BLNK61;CACNA1H;LOC106045119;WNT5A;FZD3;RASD1;FZD2;ADCY5;LOC10602987820;WNT10A;FZD7;FZD1;CACNA1S;CREB3L1
26	map03320	PPAR signaling pathway	KEGG PATHWAY	26/2644	93/11318	0.175628	0.47023	Organismal Systems	Endocrine system	gene20702|gene16053|gene10595|gene18929|gene6985|gene18977|gene11205|gene14345|gene8482|gene10056|gene172|gene2804|gene7318|gene6260|gene20844|gene2802|gene17847|gene12815|gene7215|gene4029|gene16473|gene16925|gene8086|gene20117|gene6009|gene576	LOC106029567;FABP3;EHHADH;PLIN2;ACSL1;ACSBG2;LOC106039769;GK;PLA1A2;ACSL4;SCD;FABP5;CD36;FABP6;LOC106029718;LOC106030656;PLTP;RXRG;ACOX2;ACSL5;ANGPTL4;PPARD;PLIN1;LOC106049619;EVC9;ACOX3
18	map04370	VEGF signaling pathway	KEGG PATHWAY	18/2644	62/11318	0.180626	0.479743	Environmental Information Processing	Signal transduction	gene1361|gene1358|gene7610|gene1364|gene12661|gene1359|gene5990|gene15282|gene1356|gene3030|gene3569|gene1362|gene6629|gene16801|gene1360|gene1227|gene5078|gene12197	LOC106043002;LOC106042968;BLNK10;LOC106040722;HSPB1;LOC106042978;PTGS2;PIK3CD;PLA2G4F;KDR;PXN;LOC106042972;SPHK1;PRKCB;LOC106042985;NFATC2;PIK3R3;SRC
19	map01524	Platinum drug resistance	KEGG PATHWAY	19/2644	66/11318	0.182863	0.481829	Human Diseases	Drug resistance: antineoplastic	gene6988|gene15282|gene4609|gene2668|gene8056|gene11583|gene12791|gene2666|gene19020|gene10080|gene5078|gene12209|gene2665|gene6815|gene1996|gene16898|gene20078|gene14202|gene3090	CASP3;PIK3CD;REV3L;LOC106030437;PMAIP1;XPA;FASLG;LOC106030436;LOC10602987820;XIAP;PIK3R3;MGST2;LOC106030435;ATP7B;POLH;BAK1;TOP2A;MSH2;MGST1
6	map00910	Nitrogen metabolism	KEGG PATHWAY	6/2644	17/11318	0.186688	0.488035	Metabolism	Energy metabolism	gene8697|gene17235|gene17556|gene3486|gene8061|gene10501	LOC106037044;SCD35;CA4;LOC106031280;CA9;CA8
37	map04621	NOD-like receptor signaling pathway	KEGG PATHWAY	37/2644	138/11318	0.19289	0.496429	Organismal Systems	Immune system	gene12292|gene15614|gene14429|gene4965|gene20707|gene11964|gene12305|gene3669|gene3889|gene20213|gene17769|gene17768|gene10253|gene8744|gene20599|gene16188|gene17700|gene12557|gene17686|gene11169|gene13146|gene4565|gene9668|gene2407|gene18290|gene18291|gene14154|gene13288|gene208|gene14115|gene10080|gene15161|gene5182|gene5185|gene17145|gene11333|gene2765	LOC106041040;LOC106044678;LOC106043382;JUN;LOC106029573;CARD9;LOC106041090;TRAF5;IRF7;IL1B;LOC106047052;LOC106047050;NFKBIA;TRAF2;LOC106029457;NFKB1;HSP90AA1;IKBKE;TRAF3;IL18;NAMPT;TNFAIP3;LOC106038139;IL6;ANTXR1;GKN1;LOC106043112;CXCL1288;LOC106030078;TXN;XIAP;PSTPIP1;LOC106033293;LOC106033294;LOC106046397;STAT1;RIPK2
41	map05225	Hepatocellular carcinoma	KEGG PATHWAY	41/2644	154/11318	0.191678	0.497165	Human Diseases	Cancer: specific types	gene12283|gene19553|gene19671|gene3401|gene18661|gene11436|gene12209|gene7584|gene5078|gene16171|gene13515|gene4772|gene7321|gene4032|gene18485|gene3090|gene9948|gene10796|gene10798|gene17334|gene18392|gene15282|gene17031|gene2666|gene2668|gene10159|gene13212|gene2665|gene2120|gene8439|gene12509|gene16021|gene11855|gene9629|gene17618|gene19020|gene16898|gene2357|gene11073|gene16801|gene17397	FZD9;SMARCD3;WNT4;FZD10;FZD4;WNT7A;MGST2;HMOX1;PIK3R3;FZD8;WNT11;HPSE272;HGF;TCF7L2;LOC106047829;MGST1;MYC;WNT10A;WNT6;NQO1;PSD92;PIK3CD;TGFA;LOC106030436;LOC106030437;LEF1;CXCL1212;LOC106030435;LOC106029911;WNT3A;WNT2B;LOC106045119;WNT5A;FZD3;FZD2;LOC10602987820;BAK1;FZD7;FZD1;PRKCB;GAB1
11	map00250	Alanine, aspartate and glutamate metabolism	KEGG PATHWAY	11/2644	36/11318	0.201554	0.514737	Metabolism	Amino acid metabolism	gene20429|gene15059|gene4620|gene8697|gene4826|gene18710|gene3044|gene6070|gene948|gene9085|gene538	IL4I1;ASS1;DDO;LOC106037044;GFPT2;GAD2;PPAT;LOC106034162;NIT2;ASNS;NAT8L
52	map04020	Calcium signaling pathway	KEGG PATHWAY	52/2644	200/11318	0.208767	0.52909	Environmental Information Processing	Signal transduction	gene16349|gene16306|gene20665|gene12427|gene10808|gene20397|gene16782|gene1901|gene12669|gene6629|gene3342|gene16609|gene17626|gene20029|gene19270|gene6855|gene14211|gene18170|gene14050|gene16632|gene7870|gene19518|gene10735|gene8728|gene8354|gene20396|gene13258|gene14433|gene11403|gene15729|gene745|gene3348|gene20398|gene20399|gene10970|gene16418|gene4257|gene3752|gene10996|gene20364|gene4930|ge…	PDE1C;LOC106045455;LOC106029527;GRIN2A;PLCD4;LOC106049912;LOC106045971;LOC1060298781;ORAI2;SPHK1;LOC106031149;ADORA2B;PLCD3;PTK2B;PIK3AP170;HTR2A;LHCGR;LOC106047519;CYSLTR1;ATP2B4;AGTR1;MYLK4;CXCR4;GRIN1;OXTR;LOC106049916;CXCL1258;LOC106043396;HRH1;HTR2B;BDKRB1;LOC106031415;LOC106049913;LOC106049914;ADCY7;SLC8A1;CACNA1H;ITPKB;MYLK3;MOCS14;HRH2;PTGFR;PDGFRB;EDNRA;LOC106038708;CAMK4;PIK3AP171;PTAFR…
61	map04014	Ras signaling pathway	KEGG PATHWAY	61/2644	237/11318	0.211442	0.531809	Environmental Information Processing	Signal transduction	gene15854|gene12665|gene19270|gene8973|gene18995|gene15614|gene16782|gene19948|gene848|gene12556|gene4102|gene9326|gene1360|gene5078|gene1358|gene1359|gene7610|gene7321|gene5780|gene5563|gene15094|gene1356|gene15359|gene16188|gene11513|gene11894|gene7975|gene15282|gene8728|gene17031|gene18243|gene16801|gene15062|gene1157|gene13562|gene12791|gene17397|gene12357|gene17756|gene12427|gene5968|gene162…	INSR;LOC106041406;PIK3AP170;FGF13;CSF1;LOC106044678;LOC106045971;RASAL3;PLA1A;RASSF5;PLD1;FIGF;LOC106042985;PIK3R3;LOC106042968;LOC106042978;BLNK10;HGF;BDNF;FGF7;RALGDS;PLA2G4F;FGFR1;NFKB1;LOC106040243;ETS1;FGF10;PIK3CD;GRIN1;TGFA;FGF12;PRKCB;ABL1;STK4;PLA2G4F2;FASLG;GAB1;FLT3;PAK6;GRIN2A;WFS18;NTRK2;FGF9;EPHA2;KDR;LOC106040722;LOC106043002;IGF1;ZAP70;LOC106042972;RASGRF1;LOC106044308;PDGFRB;LOC1…
32	map04270	Vascular smooth muscle contraction	KEGG PATHWAY	32/2644	120/11318	0.223602	0.558165	Organismal Systems	Circulatory system	gene15614|gene4367|gene4127|gene16609|gene1359|gene8074|gene6455|gene1356|gene17316|gene7870|gene11550|gene19283|gene1358|gene8803|gene12162|gene12131|gene11513|gene2105|gene15538|gene10996|gene1364|gene1361|gene1360|gene1362|gene16293|gene4315|gene10183|gene10220|gene19518|gene16801|gene10970|gene16949	LOC106044678;GUCY1A3;LOC106032022;ADORA2B;LOC106042978;NPR2;GNA13;PLA2G4F;EDN2;AGTR1;NPPC;PIK3AP183;LOC106042968;PRKCH;ADM;EDN3;LOC106040243;ADCY5;AGT;MYLK3;LOC106040722;LOC106043002;LOC106042985;LOC106042972;MYL9;EDNRA;LOC106038708;PRKCQ;MYLK4;PRKCB;ADCY7;CACNA1S
27	map00564	Glycerophospholipid metabolism	KEGG PATHWAY	27/2644	100/11318	0.225332	0.558286	Metabolism	Lipid metabolism	gene8850|gene848|gene4102|gene3764|gene1358|gene1359|gene1356|gene11513|gene3538|gene16891|gene12296|gene1360|gene11578|gene4974|gene1362|gene2125|gene18296|gene1361|gene16437|gene18766|gene20038|gene4234|gene1364|gene12594|gene12872|gene18351|gene1417	HHEX50;PLA1A;PLD1;LCLAT1;LOC106042968;LOC106042978;PLA2G4F;LOC106040243;PISD;CEPT1;LOC106041043;LOC106042985;DGKQ;PPAP2B;LOC106042972;LOC106029917;CDS2;LOC106043002;GPCPD1;CDS1;LOC106049530;PEMT;LOC106040722;ETNK2;MBOAT1;PSD51;DGKZ
6	map00670	One carbon pool by folate	KEGG PATHWAY	6/2644	18/11318	0.227993	0.560693	Metabolism	Metabolism of cofactors and vitamins	gene18281|gene13081|gene4250|gene1888|gene14460|gene11553	MTHFD2;MTHFD2L;SHMT1;MTR;LOC106043431;MTHFR
6	map00533	Glycosaminoglycan biosynthesis - keratan sulfate	KEGG PATHWAY	6/2644	18/11318	0.227993	0.560693	Metabolism	Glycan biosynthesis and metabolism	gene15726|gene16443|gene862|gene1404|gene16269|gene863	B3GNT7;B3GNT2;B4GALT4;CHST1;TNFRSF13C9;B4GALT3
2	map00524	Neomycin, kanamycin and gentamicin biosynthesis	KEGG PATHWAY	2/2644	4/11318	0.234364	0.567947	Metabolism	Biosynthesis of other secondary metabolites	gene20011|gene19453	LOC106049507;GCK
13	map00520	Amino sugar and nucleotide sugar metabolism	KEGG PATHWAY	13/2644	45/11318	0.236619	0.569258	Metabolism	Carbohydrate metabolism	gene5831|gene12760|gene16641|gene16642|gene15045|gene16452|gene19453|gene4826|gene9725|gene9752|gene1970|gene20011|gene10570	LOC106033848;UAP1;LOC106045866;LOC106045865;CAT5;UGP2;GCK;GFPT2;CMAS;LOC106038270;LOC1060341970;LOC106049507;UGDH
27	map04933	AGE-RAGE signaling pathway in diabetic complications	KEGG PATHWAY	27/2644	102/11318	0.261003	0.623402	Human Diseases	Endocrine and metabolic disease	gene4693|gene10808|gene8965|gene10829|gene14183|gene4965|gene2407|gene9326|gene10862|gene5078|gene6988|gene17626|gene9821|gene16188|gene7870|gene15282|gene20213|gene2120|gene10062|gene15538|gene12814|gene13288|gene13386|gene16946|gene16801|gene6346|gene11333	EGR1;PLCD4;NOX1;VCAM1;MMP2;JUN;IL6;FIGF;F3;PIK3R3;CASP3;PLCD3;NFATC1;NFKB1;AGTR1;PIK3CD;IL1B;LOC106029911;COL4A6;AGT;LOC106041602;CXCL1288;THBD;LOC106046136;PRKCB;FN1;STAT1
19	map05218	Melanoma	KEGG PATHWAY	19/2644	70/11318	0.26638	0.631702	Human Diseases	Cancer: specific types	gene7519|gene18243|gene8973|gene4849|gene7321|gene5563|gene13562|gene15282|gene19020|gene15359|gene16898|gene6002|gene11699|gene16021|gene17324|gene7975|gene5078|gene17323|gene18392	IGF1;FGF12;FGF13;PDGFRB;HGF;FGF7;PLA2G4F2;PIK3CD;LOC10602987820;FGFR1;BAK1;EVC2;FGF9;LOC106045119;LOC106046593;FGF10;PIK3R3;LOC106046592;PSD92
27	map05410	Hypertrophic cardiomyopathy (HCM)	KEGG PATHWAY	27/2644	103/11318	0.279648	0.658461	Human Diseases	Cardiovascular disease	gene16763|gene3016|gene19493|gene2407|gene4209|gene2296|gene14670|gene2150|gene6607|gene989|gene19308|gene7346|gene11690|gene3842|gene4899|gene4973|gene3348|gene2286|gene15538|gene16418|gene4508|gene7322|gene7519|gene16356|gene13298|gene16803|gene16949	ITGB3;SGCB;LMNA;IL6;LOC106032083;ITGA4;ITGA11;ITGB6;ITGB4;MYH15;DAG1;ITGA2;SGCG;ACTC1;SGCD;PRKAA2;LOC106031415;TTN;AGT;SLC8A1;LAMA2;CACNA2D1;IGF1;ITGA9;CXCL1298;CACNG3;CACNA1S
16	map00983	Drug metabolism - other enzymes	KEGG PATHWAY	16/2644	59/11318	0.291579	0.68172	Metabolism	Xenobiotics biodegradation and metabolism	gene2935|gene2668|gene5258|gene8212|gene17473|gene2666|gene18422|gene6535|gene2665|gene3521|gene12624|gene14975|gene12882|gene12063|gene3090|gene12209	RRM2;LOC106030437;LOC106033238;UPP1;TK1;LOC106030436;NFKB222;LOC106034733;LOC106030435;UPB1;GUSB;LOC1060444515;TPMT;UCKL1;MGST1;MGST2
16	map05031	Amphetamine addiction	KEGG PATHWAY	16/2644	59/11318	0.291579	0.68172	Human Diseases	Substance dependence	gene2464|gene10183|gene4881|gene18781|gene13457|gene4965|gene12427|gene1416|gene2105|gene7661|gene16801|gene14089|gene20646|gene16119|gene10304|gene8728	CREB5;LOC106038708;GRIA1;GRIN3B;CAMK4;JUN;GRIN2A;CREB3L1;ADCY5;BLNK61;PRKCB;GRIN3A;LOC106029507;SLC18A2;FOS;GRIN1
42	map04022	cGMP-PKG signaling pathway	KEGG PATHWAY	42/2644	167/11318	0.318961	0.725308	Environmental Information Processing	Signal transduction	gene15854|gene15614|gene2464|gene12341|gene12342|gene10060|gene4209|gene8156|gene15653|gene4367|gene16663|gene4127|gene6021|gene8074|gene6455|gene7933|gene18170|gene9821|gene9727|gene7870|gene11550|gene12521|gene3348|gene2105|gene7661|gene16418|gene12192|gene7316|gene10996|gene4021|gene16632|gene16293|gene4315|gene10183|gene989|gene1227|gene18210|gene19518|gene15402|gene10970|gene16949|gene1416	INSR;LOC106044678;CREB5;GTF2I;GTF2IRD1;IRS4;LOC106032083;MEF2A;SRF;GUCY1A3;ADORA1;LOC106032022;TRPC6;NPR2;GNA13;IRS1;LOC106047519;NFATC1;KCNJ8;AGTR1;NPPC;LOC106041380;LOC106031415;ADCY5;BLNK61;SLC8A1;PDE3B;GNAI1;MYLK3;ADRA2A;ATP2B4;MYL9;EDNRA;LOC106038708;MYH15;NFATC2;MEF2C;MYLK4;IRS2;ADCY7;CACNA1S;CREB3L1
10	map00410	beta-Alanine metabolism	KEGG PATHWAY	10/2644	36/11318	0.32353	0.725756	Metabolism	Metabolism of other amino acids	gene14372|gene16586|gene16587|gene3295|gene18846|gene18710|gene20768|gene3521|gene10595|gene576	GADL1;LOC106045763;LOC106045817;ALDH2;LOC106048260;GAD2;LOC106029637;UPB1;EHHADH;ACOX3
6	map00053	Ascorbate and aldarate metabolism	KEGG PATHWAY	6/2644	20/11318	0.317439	0.726825	Metabolism	Carbohydrate metabolism	gene16586|gene16587|gene3295|gene20768|gene14975|gene10570	LOC106045763;LOC106045817;ALDH2;LOC106029637;LOC1060444515;UGDH
12	map00380	Tryptophan metabolism	KEGG PATHWAY	12/2644	44/11318	0.322431	0.728211	Metabolism	Amino acid metabolism	gene15194|gene10747|gene5961|gene20429|gene3637|gene16586|gene16587|gene3295|gene20768|gene1504|gene1971|gene10595	LOC106044188;ACMSD;CCBL2;IL4I1;HAAO;LOC106045763;LOC106045817;ALDH2;LOC106029637;CAT;LOC1060341971;EHHADH
17	map04924	Renin secretion	KEGG PATHWAY	17/2644	64/11318	0.315956	0.728454	Organismal Systems	Endocrine system	gene16349|gene16949|gene4315|gene12131|gene10183|gene15538|gene12593|gene2105|gene17316|gene5949|gene4367|gene7870|gene16663|gene8006|gene12192|gene7316|gene5948	PDE1C;CACNA1S;EDNRA;EDN3;LOC106038708;AGT;REN;ADCY5;EDN2;LOC106034007;GUCY1A3;AGTR1;ADORA1;PTGER4;PDE3B;GNAI1;LOC106034001
2	map00400	Phenylalanine, tyrosine and tryptophan biosynthesis	KEGG PATHWAY	2/2644	5/11318	0.332643	0.741191	Metabolism	Amino acid metabolism	gene20429|gene7523	IL4I1;PAH
18	map05221	Acute myeloid leukemia	KEGG PATHWAY	18/2644	69/11318	0.339109	0.750562	Human Diseases	Cancer: specific types	gene208|gene16925|gene15178|gene4772|gene14438|gene10159|gene13574|gene12357|gene15282|gene4032|gene20146|gene14384|gene2746|gene9948|gene16946|gene16188|gene1439|gene5078	LOC106030078;PPARD;PML;HPSE272;RUNX1;LEF1;CCNA2;FLT3;PIK3CD;TCF7L2;LOC106049641;BCL2A1;RUNX1T1;MYC;LOC106046136;NFKB1;SPI1;PIK3R3
8	map00790	Folate biosynthesis	KEGG PATHWAY	8/2644	29/11318	0.361987	0.785488	Metabolism	Metabolism of cofactors and vitamins	gene7523|gene15943|gene275|gene2036|gene15033|gene652|gene3103|gene3107	PAH;MOCOS;PCBD1;MOCS1;GCH1;QDPR;LOC106030914;LOC106030918
4	map00603	Glycosphingolipid biosynthesis - globo and isoglobo series	KEGG PATHWAY	4/2644	13/11318	0.360886	0.78825	Metabolism	Glycan biosynthesis and metabolism	gene9754|gene9722|gene15095|gene16269	A4GALT;ST8SIA1;GBGT1;TNFRSF13C9
39	map05164	Influenza A	KEGG PATHWAY	39/2644	157/11318	0.359212	0.78979	Human Diseases	Infectious disease: viral	gene12292|gene17471|gene19495|gene12437|gene2407|gene1969|gene12305|gene3889|gene5078|gene6988|gene15178|gene20213|gene17769|gene17768|gene10253|gene6479|gene16188|gene13649|gene15282|gene17686|gene16645|gene11576|gene16898|gene12791|gene20840|gene12557|gene19934|gene11169|gene20201|gene208|gene8304|gene5182|gene5185|gene20407|gene16801|gene20405|gene11333|gene7825|gene4107	LOC106041040;SOCS3;RAB25;CIITA;IL6;EIF2AK2;LOC106041090;IRF7;PIK3R3;CASP3;PML;IL1B;LOC106047052;LOC106047050;NFKBIA;PROM19;NFKB1;LOC1060407229;PIK3CD;TRAF3;CCND3;DDX58;BAK1;FASLG;LOC10603007840;IKBKE;LOC106049424;IL18;TNFRSF10B;LOC106030078;XPO1;LOC106033293;LOC106033294;LOC106049920;PRKCB;LOC106049922;STAT1;LOC106036132;TNFSF10
40	map05161	Hepatitis B	KEGG PATHWAY	40/2644	162/11318	0.372969	0.804063	Human Diseases	Infectious disease: viral	gene13264|gene13265|gene13574|gene2464|gene2720|gene4965|gene2407|gene17850|gene5078|gene18816|gene3889|gene20029|gene10253|gene3774|gene9948|gene9821|gene16188|gene2120|gene17686|gene6988|gene11576|gene11888|gene20823|gene12791|gene7661|gene12557|gene16021|gene4347|gene12197|gene18392|gene15282|gene208|gene10304|gene19020|gene4218|gene1227|gene16801|gene11335|gene1416|gene11333	CXCL1264;CXCL1265;CCNA2;CREB5;CCNE2;JUN;IL6;MMP9;PIK3R3;LOC106048210;IRF7;PTK2B;NFKBIA;SLC10A1;MYC;NFATC1;NFKB1;LOC106029911;TRAF3;CASP3;DDX58;TIRAP;LOC10603007823;FASLG;BLNK61;IKBKE;LOC106045119;LOC106032265;SRC;PSD92;PIK3CD;LOC106030078;FOS;LOC10602987820;MAP2K3;NFATC2;PRKCB;STAT4;CREB3L1;STAT1
14	map04742	Taste transduction	KEGG PATHWAY	14/2644	54/11318	0.377865	0.809363	Organismal Systems	Sensory system	gene16349|gene8759|gene1164|gene17596|gene1901|gene15547|gene16816|gene2995|gene2993|gene7410|gene18496|gene7691|gene6243|gene2031	PDE1C;ENTPD2;LOC106041081;LOC106046904;LOC1060298781;LOC106044607;SCNN1B;GABRA4;GABRA2;HTR1A;NFKB296;BLNK91;GABRA1;KCNK5
11	map04930	Type II diabetes mellitus	KEGG PATHWAY	11/2644	42/11318	0.389194	0.828284	Human Diseases	Endocrine and metabolic disease	gene15854|gene15402|gene17471|gene7933|gene15282|gene19453|gene10060|gene4100|gene20011|gene12442|gene5078	INSR;IRS2;SOCS3;IRS1;PIK3CD;GCK;IRS4;SLC2A2;LOC106049507;SOCS1;PIK3R3
16	map04730	Long-term depression	KEGG PATHWAY	16/2644	63/11318	0.3981	0.841843	Organismal Systems	Nervous system	gene1358|gene1360|gene6455|gene1361|gene1359|gene3529|gene4881|gene1356|gene14137|gene1362|gene4367|gene16801|gene7519|gene7316|gene10479|gene1364	LOC106042968;LOC106042985;GNA13;LOC106043002;LOC106042978;GNAZ;GRIA1;PLA2G4F;GNAO1;LOC106042972;GUCY1A3;PRKCB;IGF1;GNAI1;LYN;LOC106040722
22	map04211	Longevity regulating pathway	KEGG PATHWAY	22/2644	89/11318	0.420961	0.841922	Organismal Systems	Aging	gene15854|gene2464|gene13457|gene10060|gene15402|gene5078|gene4637|gene7933|gene1504|gene16188|gene679|gene3414|gene6036|gene4973|gene15282|gene10970|gene7661|gene3131|gene7519|gene9039|gene2105|gene1416	INSR;CREB5;CAMK4;IRS4;IRS2;PIK3R3;FOXO3;IRS1;CAT;NFKB1;PPARGC1A;ULK1;SESN3;PRKAA2;PIK3CD;ADCY7;BLNK61;DNA21;IGF1;LOC106037440;ADCY5;CREB3L1
23	map04350	TGF-beta signaling pathway	KEGG PATHWAY	23/2644	93/11318	0.416389	0.842934	Environmental Information Processing	Signal transduction	gene12268|gene15614|gene16525|gene17183|gene5173|gene8503|gene1270|gene9948|gene13967|gene8920|gene2120|gene10138|gene2646|gene16022|gene14887|gene3818|gene8539|gene8127|gene5570|gene6732|gene16477|gene11494|gene1982	ACVR2A;LOC106044678;AMH;TFDP1;E2F4;ACVR2B;BMP7;MYC;INHBA;SMAD7;LOC106029911;PITX2;BMP5;LOC106045127;ACVR1C;THBS1;DCN;RGMA;FBN1;TGIF1;LOC106045698;LOC106040155;LTBP1
21	map04912	GnRH signaling pathway	KEGG PATHWAY	21/2644	84/11318	0.401971	0.844647	Organismal Systems	Endocrine system	gene1358|gene4693|gene1361|gene20029|gene1359|gene1360|gene14183|gene4965|gene1356|gene16949|gene4102|gene2105|gene7661|gene13840|gene4218|gene16801|gene1362|gene10970|gene10183|gene12197|gene1364	LOC106042968;EGR1;LOC106043002;PTK2B;LOC106042978;LOC106042985;MMP2;JUN;PLA2G4F;CACNA1S;PLD1;ADCY5;BLNK61;HBEGF;MAP2K3;PRKCB;LOC106042972;ADCY7;LOC106038708;SRC;LOC106040722
27	map04724	Glutamatergic synapse	KEGG PATHWAY	27/2644	110/11318	0.420434	0.845965	Organismal Systems	Nervous system	gene8697|gene4881|gene18781|gene4102|gene14089|gene14309|gene1358|gene1359|gene18754|gene18756|gene1356|gene13237|gene8728|gene14419|gene5926|gene12427|gene2105|gene7316|gene1364|gene1361|gene1360|gene1362|gene20461|gene10970|gene14137|gene16801|gene1792	LOC106037044;GRIA1;GRIN3B;PLD1;GRIN3A;LOC106043289;LOC106042968;LOC106042978;LOC106048154;LOC106048152;PLA2G4F;CXCL1237;GRIN1;HOMER2;GNG5;GRIN2A;ADCY5;GNAI1;LOC106040722;LOC106043002;LOC106042985;LOC106042972;ADRBK1;ADCY7;GNAO1;PRKCB;SLC38A2
52	map04024	cAMP signaling pathway	KEGG PATHWAY	52/2644	215/11318	0.412732	0.851099	Environmental Information Processing	Signal transduction	gene20628|gene15614|gene16525|gene4881|gene18781|gene13457|gene4965|gene4102|gene16663|gene7391|gene7410|gene14089|gene6436|gene7452|gene5078|gene6432|gene14604|gene5780|gene6174|gene17316|gene10253|gene18304|gene9821|gene16188|gene15495|gene7691|gene8728|gene8354|gene13258|gene2464|gene4298|gene12131|gene15282|gene3348|gene12427|gene4411|gene10970|gene7610|gene12192|gene7316|gene14211|gene16632|…	LOC106029489;LOC106044678;AMH;GRIA1;GRIN3B;CAMK4;JUN;PLD1;ADORA1;PDE4D;HTR1A;GRIN3A;SOX9;CNGA3;PIK3R3;SSTR2;PDE4B;BDNF;ARAP3;EDN2;NFKBIA;SUCNR1;NFATC1;NFKB1;TSHR;BLNK91;GRIN1;OXTR;CXCL1258;CREB5;HHIP;EDN3;PIK3CD;LOC106031415;GRIN2A;NPY1R;ADCY7;BLNK10;PDE3B;GNAI1;LHCGR;ATP2B4;MYL9;EDNRA;ADCY5;FOS;LOC106038708;GCG;LOC106049445;CACNA1S;ACOX3;CREB3L1
5	map00770	Pantothenate and CoA biosynthesis	KEGG PATHWAY	5/2644	18/11318	0.415712	0.851952	Metabolism	Metabolism of cofactors and vitamins	gene20227|gene14372|gene16324|gene3521|gene4534	PPCS;GADL1;BCAT1;UPB1;LOC106032501
5	map00450	Selenocompound metabolism	KEGG PATHWAY	5/2644	18/11318	0.415712	0.851952	Metabolism	Metabolism of other amino acids	gene1888|gene226|gene691|gene5961|gene3445	MTR;PAPSS2;SEPSECS;CCBL2;TXNRD2
1	map00785	Lipoic acid metabolism	KEGG PATHWAY	1/2644	2/11318	0.412662	0.86166	Metabolism	Metabolism of cofactors and vitamins	gene10569	LIAS
1	map00660	C5-Branched dibasic acid metabolism	KEGG PATHWAY	1/2644	2/11318	0.412662	0.86166	Metabolism	Carbohydrate metabolism	gene14921	IRG1
36	map04218	Cellular senescence	KEGG PATHWAY	36/2644	149/11318	0.439833	0.874399	Cellular Processes	Cell growth and death	gene17512|gene5647|gene13574|gene19020|gene14429|gene2720|gene2407|gene12556|gene4218|gene1227|gene5078|gene5173|gene16645|gene20337|gene9948|gene9821|gene16188|gene3696|gene3255|gene2120|gene4637|gene11894|gene16021|gene4606|gene18392|gene15282|gene349|gene10183|gene7841|gene20037|gene18740|gene4840|gene13228|gene20644|gene3789|gene11883	CDC25A;CCNB2;CCNA2;LOC10602987820;LOC106043382;CCNE2;IL6;RASSF5;MAP2K3;NFATC2;PIK3R3;E2F4;CCND3;LOC106049848;MYC;NFATC1;NFKB1;CAPN2;TRPV4;LOC106029911;FOXO3;ETS1;LOC106045119;TRAF3IP2;PSD92;PIK3CD;CDK1;LOC106038708;ETS2;CCNB3;FOXM1;SQSTM1;CXCL1228;LOC106029505;ZFP36L1;CHEK1
13	map05014	Amyotrophic lateral sclerosis (ALS)	KEGG PATHWAY	13/2644	52/11318	0.442634	0.87473	Human Diseases	Neurodegenerative disease	gene6988|gene11543|gene5015|gene4862|gene4218|gene4881|gene19389|gene19388|gene12427|gene12305|gene2359|gene8728|gene1504	CASP3;TNFRSF1B;GPX7;GPX3;MAP2K3;GRIA1;NEFL;NEFM;GRIN2A;LOC106041090;ALS2;GRIN1;CAT
25	map04726	Serotonergic synapse	KEGG PATHWAY	25/2644	103/11318	0.45118	0.875976	Organismal Systems	Nervous system	gene7410|gene16119|gene1358|gene1359|gene197|gene1356|gene6988|gene5990|gene6855|gene15729|gene5926|gene2105|gene6247|gene7316|gene15470|gene1361|gene1360|gene1362|gene1619|gene1364|gene14137|gene10346|gene16801|gene16949|gene13852	HTR1A;SLC18A2;LOC106042968;LOC106042978;LOC106034197;PLA2G4F;CASP3;PTGS2;HTR2A;HTR2B;GNG5;ADCY5;GABRB2;GNAI1;KCND2;LOC106043002;LOC106042985;LOC106042972;LOC106046243;LOC106040722;GNAO1;HTR5A;PRKCB;CACNA1S;DUSP1
12	map00330	Arginine and proline metabolism	KEGG PATHWAY	12/2644	48/11318	0.449096	0.882248	Metabolism	Amino acid metabolism	gene2941|gene9371|gene18134|gene3800|gene16586|gene16587|gene3295|gene20768|gene9378|gene13830|gene19195|gene4615	ODC1;SMS;LOC106047481;ARG2;LOC106045763;LOC106045817;ALDH2;LOC106029637;SAT1;ERCC630;LOC106048637;AMD1
12	map00514	Other types of O-glycan biosynthesis	KEGG PATHWAY	12/2644	48/11318	0.449096	0.882248	Metabolism	Glycan biosynthesis and metabolism	gene7273|gene4888|gene2478|gene12319|gene7614|gene5969|gene19260|gene19356|gene2177|gene3782|gene12383|gene863	GXYLT2;GALNT10;GALNT15;WBSCR17;BLNK14;WFS19;PIK3AP160;GALNT2;GALNT3;GALNT16;B3GLCT;B4GALT3
35	map04210	Apoptosis	KEGG PATHWAY	35/2644	146/11318	0.46244	0.892617	Cellular Processes	Cell growth and death	gene14409|gene19493|gene4965|gene11989|gene16684|gene20089|gene11983|gene5078|gene6988|gene17954|gene8056|gene10253|gene8744|gene14384|gene16188|gene19789|gene3696|gene11723|gene15282|gene16898|gene12791|gene20542|gene7661|gene3891|gene7599|gene6488|gene20201|gene16458|gene10304|gene10080|gene208|gene15892|gene20501|gene11741|gene4107	LOC106043362;LMNA;JUN;DAB2IP;LOC106045884;DDIT3;TRAF1;PIK3R3;CASP3;ENDOG;PMAIP1;NFKBIA;TRAF2;BCL2A1;NFKB1;LOC10603419789;CAPN2;HNF4A3;PIK3CD;BAK1;FASLG;PRF1;BLNK61;PIDD1;LOC106035885;ERN1;TNFRSF10B;LMNB2;FOS;XIAP;LOC106030078;LOC106044971;LOC106029353;LMNB1;TNFSF10
25	map04114	Oocyte meiosis	KEGG PATHWAY	25/2644	104/11318	0.472919	0.907567	Cellular Processes	Cell growth and death	gene18084|gene12662|gene2720|gene10599|gene6255|gene4697|gene13398|gene10098|gene16810|gene19433|gene3340|gene18515|gene2105|gene16393|gene7519|gene349|gene1261|gene10183|gene2496|gene20037|gene13228|gene19431|gene5647|gene10970|gene5872	CPEB1;YWHAG;CCNE2;ANAPC13;PTTG1;LOC106032718;BUB1;MAD2L1;PLK1;LOC106048913;ANAPC5;RPS6KA1;ADCY5;AR;IGF1;CDK1;AURKA;LOC106038708;SGOL1;CCNB3;CXCL1228;LOC106048914;CCNB2;ADCY7;CDC20
8	map03030	DNA replication	KEGG PATHWAY	8/2644	32/11318	0.480919	0.917615	Genetic Information Processing	Replication and repair	gene313|gene9605|gene10737|gene18126|gene9911|gene9675|gene10566|gene7585	DNA2;MCM2;MCM6;POLE;MCM4;MCM3;RFC1;MCM5
19	map05120	Epithelial cell signaling in Helicobacter pylori infection	KEGG PATHWAY	19/2644	79/11318	0.485848	0.921724	Human Diseases	Infectious disease: bacterial	gene12292|gene5643|gene6988|gene2944|gene15479|gene10253|gene14247|gene8686|gene4965|gene3373|gene13840|gene208|gene5182|gene5185|gene16188|gene16692|gene10479|gene12197|gene15263	LOC106041040;ADAM10;CASP3;ATP6V1C2;PTPRZ1;NFKBIA;ATP6V1B1;ATP6V1G1;JUN;TCTN2;HBEGF;LOC106030078;LOC106033293;LOC106033294;NFKB1;LOC106045913;LYN;SRC;LOC106044308
17	map04212	Longevity regulating pathway - worm	KEGG PATHWAY	17/2644	71/11318	0.499747	0.921756	Organismal Systems	Aging	gene15854|gene16588|gene11359|gene11723|gene2668|gene2665|gene7933|gene15282|gene2666|gene172|gene3234|gene12209|gene7661|gene4637|gene1504|gene9825|gene3090	INSR;ULK2;HSPD1;HNF4A3;LOC106030437;LOC106030435;IRS1;PIK3CD;LOC106030436;SCD;CCDC53;MGST2;BLNK61;FOXO3;CAT;HSBP1L1;MGST1
6	map04614	Renin-angiotensin system	KEGG PATHWAY	6/2644	24/11318	0.502998	0.922627	Organismal Systems	Endocrine system	gene18649|gene20455|gene9021|gene12593|gene15538|gene7870	PRCP;LOC106029317;AGTR2;REN;AGT;AGTR1
14	map00280	Valine, leucine and isoleucine degradation	KEGG PATHWAY	14/2644	58/11318	0.495092	0.92343	Metabolism	Amino acid metabolism	gene20429|gene19149|gene17252|gene16324|gene16586|gene16587|gene3295|gene2647|gene4151|gene20768|gene10588|gene14619|gene10595|gene8482	IL4I1;BCKDHB;ACSF3;BCAT1;LOC106045763;LOC106045817;ALDH2;HMGCLL1;MCCC1;LOC106029637;PCCB;LOC106043624;EHHADH;PLA1A2
14	map04213	Longevity regulating pathway - multiple species	KEGG PATHWAY	14/2644	58/11318	0.495092	0.92343	Organismal Systems	Aging	gene15854|gene4637|gene7519|gene4973|gene7933|gene15282|gene10060|gene2105|gene15402|gene1504|gene8833|gene10970|gene5078|gene11109	INSR;FOXO3;IGF1;PRKAA2;IRS1;PIK3CD;IRS4;ADCY5;IRS2;CAT;HSPA2;ADCY7;PIK3R3;HSPA8
3	map00072	Synthesis and degradation of ketone bodies	KEGG PATHWAY	3/2644	11/11318	0.493068	0.924852	Metabolism	Lipid metabolism	gene2647|gene10701|gene16193	HMGCLL1;BDH1;BDH2
7	map03410	Base excision repair	KEGG PATHWAY	7/2644	28/11318	0.491188	0.92656	Genetic Information Processing	Replication and repair	gene11723|gene18126|gene3268|gene5395|gene12913|gene4294|gene5095	HNF4A3;POLE;UNG;POLN5;NEIL3;NTHL1;MUTYH
1	map00290	Valine, leucine and isoleucine biosynthesis	KEGG PATHWAY	1/2644	3/11318	0.549895	0.981533	Metabolism	Amino acid metabolism	gene16324	BCAT1
6	map04320	Dorso-ventral axis formation	KEGG PATHWAY	6/2644	25/11318	0.547096	0.981815	Organismal Systems	Development and regeneration	gene18084|gene12773|gene7841|gene19016|gene11894|gene17263	CPEB1;NOTCH2;ETS2;LOC10602987816;ETS1;SPIRE2
27	map05142	Chagas disease (American trypanosomiasis)	KEGG PATHWAY	27/2644	116/11318	0.544973	0.983321	Human Diseases	Infectious disease: parasitic	gene16306|gene16782|gene4965|gene2407|gene4347|gene5078|gene20213|gene10253|gene16188|gene12638|gene12791|gene10561|gene12292|gene20823|gene11186|gene11185|gene7316|gene15282|gene1052|gene208|gene10304|gene14137|gene19271|gene19270|gene5182|gene5185|gene2120	LOC106045455;LOC106045971;JUN;IL6;LOC106032265;PIK3R3;IL1B;NFKBIA;NFKB1;LOC106041491;FASLG;LOC106039090;LOC106041040;LOC10603007823;CD3E;CD3D;GNAI1;PIK3CD;CD247;LOC106030078;FOS;GNAO1;PIK3AP171;PIK3AP170;LOC106033293;LOC106033294;LOC106029911
3	map00920	Sulfur metabolism	KEGG PATHWAY	3/2644	12/11318	0.55706	0.989005	Metabolism	Energy metabolism	gene7603|gene226|gene19772	BLNK03;PAPSS2;LOC10603419772
12	map02010	ABC transporters	KEGG PATHWAY	12/2644	51/11318	0.543004	0.990535	Environmental Information Processing	Membrane transport	gene20335|gene11141|gene3356|gene6349|gene13059|gene19904|gene170|gene9726|gene5431|gene20641|gene20642|gene6446	LOC106049856;ABCG4;ABCB9;ABCA12;ABCG2;TJAP14;LOC106049164;ABCC9;LOC106033455;LOC106029502;TAP2;LOC106034745
12	map04214	Apoptosis - fly	KEGG PATHWAY	12/2644	51/11318	0.543004	0.990535	Cellular Processes	Cell growth and death	gene19819|gene16896|gene16458|gene3709|gene4965|gene10080|gene15756|gene7661|gene19925|gene14409|gene11741|gene7046	SAV1;LOC106046185;LMNB2;DUSP10;JUN;XIAP;LOC1060458406;BLNK61;TRAF4;LOC106043362;LMNB1;STK3
27	map04931	Insulin resistance	KEGG PATHWAY	27/2644	117/11318	0.565158	0.998045	Human Diseases	Endocrine and metabolic disease	gene15854|gene17471|gene2464|gene2407|gene10060|gene4100|gene15402|gene5078|gene15282|gene16856|gene1214|gene10253|gene7933|gene16188|gene679|gene5867|gene3267|gene4973|gene18515|gene7318|gene15263|gene15538|gene4826|gene10220|gene16801|gene20117|gene1416	INSR;SOCS3;CREB5;IL6;IRS4;SLC2A2;IRS2;PIK3R3;PIK3CD;PPP1R3B;PTPN1;NFKBIA;IRS1;NFKB1;PPARGC1A;PTPRF;ACACB;PRKAA2;RPS6KA1;CD36;LOC106044308;AGT;GFPT2;PRKCQ;PRKCB;LOC106049619;CREB3L1
15	map03013	RNA transport	KEGG PATHWAY	15/2644	222/11318	1	1	Genetic Information Processing	Translation	gene7041|gene12081|gene19180|gene10298|gene11429|gene16579|gene7515|gene8304|gene14952|gene19905|gene12909|gene18839|gene6590|gene17191|gene4907	POP1;EEF1A2;EIF4G3;EIF2B2;NUP210;GEMIN4;NUP37;XPO1;NUP54;TJAP15;NUP153;NUP160;NUP85;UPF3A;CYFIP2
6	map00062	Fatty acid elongation	KEGG PATHWAY	6/2644	26/11318	0.589341	1	Metabolism	Lipid metabolism	gene7393|gene1468|gene1336|gene19151|gene17906|gene5871	ELOVL7;HSD17B12;LOC106042682;ELOVL4;ACOT7;ELOVL1
6	map00340	Histidine metabolism	KEGG PATHWAY	6/2644	26/11318	0.589341	1	Metabolism	Amino acid metabolism	gene16586|gene16587|gene3295|gene18846|gene8560|gene20768	LOC106045763;LOC106045817;ALDH2;LOC106048260;AMDHD1;LOC106029637
38	map05167	Kaposi sarcoma-associated herpesvirus infection	KEGG PATHWAY	38/2644	167/11318	0.604053	1	Human Diseases	Infectious disease: viral	gene4965|gene2407|gene1969|gene14442|gene3889|gene5078|gene6988|gene20337|gene10253|gene8744|gene12998|gene17812|gene9948|gene9821|gene16188|gene17686|gene16898|gene13562|gene15282|gene5926|gene9868|gene9869|gene12557|gene16021|gene16004|gene12197|gene18392|gene10183|gene208|gene10304|gene19020|gene1227|gene1195|gene5990|gene20644|gene9870|gene10479|gene11333	JUN;IL6;EIF2AK2;RCAN1;IRF7;PIK3R3;CASP3;LOC106049848;NFKBIA;TRAF2;CCR4;HCK;MYC;NFATC1;NFKB1;TRAF3;BAK1;PLA2G4F2;PIK3CD;GNG5;LOC106038377;LOC106038356;IKBKE;LOC106045119;SYK;SRC;PSD92;LOC106038708;LOC106030078;FOS;LOC10602987820;NFATC2;PREX1;PTGS2;LOC106029505;LOC106038357;LYN;STAT1
21	map00561	Glycerolipid metabolism	KEGG PATHWAY	21/2644	93/11318	0.610866	1	Metabolism	Lipid metabolism	gene9602|gene20038|gene9769|gene20768|gene1417|gene11578|gene14345|gene8924|gene16587|gene3295|gene4974|gene12872|gene13512|gene7962|gene3893|gene16586|gene3103|gene12296|gene20702|gene3107|gene3764	MGLL;LOC106049530;LOC106038244;LOC106029637;DGKZ;DGKQ;GK;LIPG;LOC106045817;ALDH2;PPAP2B;MBOAT1;DGAT2;MOGAT1;PNPLA2;LOC106045763;LOC106030914;LOC106041043;LOC106029567;LOC106030918;LCLAT1
13	map05230	Central carbon metabolism in cancer	KEGG PATHWAY	13/2644	58/11318	0.618335	1	Human Diseases	Cancer: overview	gene8107|gene17501|gene4849|gene15282|gene12357|gene421|gene19453|gene15359|gene9948|gene4100|gene20011|gene530|gene5078	NTRK3;SLC16A3;PDGFRB;PIK3CD;FLT3;RET;GCK;FGFR1;MYC;SLC2A2;LOC106049507;FGFR3;PIK3R3
20	map04012	ErbB signaling pathway	KEGG PATHWAY	20/2644	89/11318	0.619642	1	Environmental Information Processing	Signal transduction	gene17031|gene5730|gene16801|gene15062|gene13079|gene13078|gene15282|gene17397|gene19020|gene4965|gene978|gene13840|gene9948|gene13836|gene400|gene11764|gene17756|gene14309|gene5078|gene12197	TGFA;NRG4;PRKCB;ABL1;EREG;AREG;PIK3CD;GAB1;LOC10602987820;JUN;CBLB;HBEGF;MYC;NRG2;NRG3;NRG1;PAK6;LOC106043289;PIK3R3;SRC
20	map05100	Bacterial invasion of epithelial cells	KEGG PATHWAY	20/2644	89/11318	0.619642	1	Human Diseases	Infectious disease: bacterial	gene5347|gene17397|gene18748|gene9200|gene15614|gene15282|gene4318|gene14127|gene978|gene10440|gene3569|gene12024|gene17969|gene12795|gene17324|gene6346|gene19119|gene5078|gene12197|gene17323	SEPT12;GAB1;LOC106048163;SEPT6;LOC106044678;PIK3CD;ARHGAP10;BCAR1;CBLB;DOCK1;PXN;LOC106040731;DNM1;DNM3;LOC106046593;FN1;RHOG;PIK3R3;SRC;LOC106046592
8	map04624	Toll and Imd signaling pathway	KEGG PATHWAY	8/2644	36/11318	0.62813	1	Organismal Systems	Immune system	gene10123|gene15343|gene10253|gene350|gene4965|gene4218|gene18099|gene16188	ANK2;ANK1;NFKBIA;ANK3;JUN;MAP2K3;DUOX2;NFKB1
6	map00650	Butanoate metabolism	KEGG PATHWAY	6/2644	27/11318	0.629426	1	Metabolism	Carbohydrate metabolism	gene10701|gene5460|gene2647|gene18710|gene10595|gene16193	BDH1;LOC106033473;HMGCLL1;GAD2;EHHADH;BDH2
14	map05223	Non-small cell lung cancer	KEGG PATHWAY	14/2644	63/11318	0.633019	1	Human Diseases	Cancer: specific types	gene18816|gene12815|gene4637|gene1157|gene16898|gene15282|gene19020|gene12556|gene17031|gene16801|gene16021|gene2519|gene5078|gene18392	LOC106048210;RXRG;FOXO3;STK4;BAK1;PIK3CD;LOC10602987820;RASSF5;TGFA;PRKCB;LOC106045119;RARB;PIK3R3;PSD92
14	map00240	Pyrimidine metabolism	KEGG PATHWAY	14/2644	63/11318	0.633019	1	Metabolism	Nucleotide metabolism	gene2935|gene8212|gene17473|gene18422|gene6535|gene2984|gene13726|gene3521|gene4833|gene9334|gene17313|gene12063|gene18607|gene14963	RRM2;UPP1;TK1;NFKB222;LOC106034733;LOC106030817;LOC106042626;UPB1;LOC106032673;CTPS2;LOC106046581;UCKL1;NT5C3B;CD443
18	map01521	EGFR tyrosine kinase inhibitor resistance	KEGG PATHWAY	18/2644	81/11318	0.638468	1	Human Diseases	Drug resistance: antineoplastic	gene17031|gene7519|gene4637|gene4849|gene7321|gene6002|gene13562|gene15282|gene17397|gene2407|gene3030|gene13836|gene16801|gene11764|gene530|gene14309|gene5078|gene12197	TGFA;IGF1;FOXO3;PDGFRB;HGF;EVC2;PLA2G4F2;PIK3CD;GAB1;IL6;KDR;NRG2;PRKCB;NRG1;FGFR3;LOC106043289;PIK3R3;SRC
20	map05032	Morphine addiction	KEGG PATHWAY	20/2644	90/11318	0.641372	1	Human Diseases	Substance dependence	gene16349|gene7391|gene6247|gene20461|gene10970|gene7316|gene12192|gene5926|gene14137|gene2105|gene2995|gene2993|gene16801|gene556|gene16663|gene6243|gene9275|gene14604|gene13875|gene7691	PDE1C;PDE4D;GABRB2;ADRBK1;ADCY7;GNAI1;PDE3B;GNG5;GNAO1;ADCY5;GABRA4;GABRA2;PRKCB;GRK4;ADORA1;GABRA1;GABRE;PDE4B;ERCC675;BLNK91
34	map04921	Oxytocin signaling pathway	KEGG PATHWAY	34/2644	152/11318	0.645492	1	Organismal Systems	Endocrine system	gene15614|gene13457|gene4965|gene14442|gene4367|gene1358|gene1359|gene8074|gene7322|gene1356|gene9821|gene19518|gene8354|gene5990|gene4973|gene10970|gene7316|gene10996|gene12197|gene1364|gene1361|gene1360|gene1362|gene16293|gene2105|gene10304|gene10183|gene19020|gene14137|gene1227|gene18210|gene16803|gene16801|gene16949	LOC106044678;CAMK4;JUN;RCAN1;GUCY1A3;LOC106042968;LOC106042978;NPR2;CACNA2D1;PLA2G4F;NFATC1;MYLK4;OXTR;PTGS2;PRKAA2;ADCY7;GNAI1;MYLK3;SRC;LOC106040722;LOC106043002;LOC106042985;LOC106042972;MYL9;ADCY5;FOS;LOC106038708;LOC10602987820;GNAO1;NFATC2;MEF2C;CACNG3;PRKCB;CACNA1S
17	map04391	Hippo signaling pathway - fly	KEGG PATHWAY	17/2644	77/11318	0.648603	1	Environmental Information Processing	Signal transduction	gene12009|gene7046|gene12635|gene14962|gene15756|gene18521|gene2720|gene1239|gene9948|gene16388|gene18300|gene19819|gene4355|gene5195|gene13549|gene16183|gene12140	CRB2;STK3;LOC106041489;MOB1B;LOC1060458406;ZDHHC18;CCNE2;TSHZ2;MYC;LOC106045529;RASSF2;SAV1;DCHS2;PARD6A;FAT4;PARD3;TEAD1
26	map04071	Sphingolipid signaling pathway	KEGG PATHWAY	26/2644	117/11318	0.650249	1	Environmental Information Processing	Signal transduction	gene15614|gene10163|gene230|gene4102|gene6629|gene16663|gene5078|gene10590|gene6455|gene10250|gene8744|gene8160|gene18974|gene16188|gene20276|gene12521|gene15282|gene7610|gene15132|gene7316|gene16929|gene20058|gene7964|gene16801|gene8261|gene15923	LOC106044678;SGMS2;ASAH2;PLD1;SPHK1;ADORA1;PIK3R3;PPP2R3A;GNA13;PPP2R3C;TRAF2;CERS3;ACER1;NFKB1;S1PR2;LOC106041380;PIK3CD;BLNK10;ACER2;GNAI1;SMPD2;MRPL148;SGPP2;PRKCB;KCNK101;LOC106044958
19	map04520	Adherens junction	KEGG PATHWAY	19/2644	86/11318	0.650831	1	Cellular Processes	Cellular community - eukaryotes	gene15854|gene7610|gene1214|gene10159|gene1209|gene2120|gene15614|gene4032|gene4772|gene17323|gene16183|gene11130|gene6749|gene12197|gene10022|gene17324|gene15359|gene5867|gene18465	INSR;BLNK10;PTPN1;LEF1;SNAI1;LOC106029911;LOC106044678;TCF7L2;HPSE272;LOC106046592;PARD3;PVRL1;PTPRM;SRC;LOC106038521;LOC106046593;FGFR1;PTPRF;NFKB265
5	map04966	Collecting duct acid secretion	KEGG PATHWAY	5/2644	23/11318	0.652403	1	Organismal Systems	Excretory system	gene14247|gene3373|gene2944|gene16734|gene8686	ATP6V1B1;TCTN2;ATP6V1C2;LOC106045951;ATP6V1G1
1	map00261	Monobactam biosynthesis	KEGG PATHWAY	1/2644	4/11318	0.655072	1	Metabolism	Biosynthesis of other secondary metabolites	gene226	PAPSS2
10	map04973	Carbohydrate digestion and absorption	KEGG PATHWAY	10/2644	46/11318	0.658644	1	Organismal Systems	Digestive system	gene15274|gene10738|gene15282|gene15547|gene10093|gene19453|gene4100|gene20011|gene16801|gene5078	SLC2A5;LCT;PIK3CD;LOC106044607;LOC106038686;GCK;SLC2A2;LOC106049507;PRKCB;PIK3R3
10	map05033	Nicotine addiction	KEGG PATHWAY	10/2644	46/11318	0.658644	1	Human Diseases	Substance dependence	gene4881|gene18781|gene12427|gene6247|gene2995|gene2993|gene14089|gene9275|gene6243|gene8728	GRIA1;GRIN3B;GRIN2A;GABRB2;GABRA4;GABRA2;GRIN3A;GABRE;GABRA1;GRIN1
10	map04962	Vasopressin-regulated water reabsorption	KEGG PATHWAY	10/2644	46/11318	0.658644	1	Organismal Systems	Excretory system	gene11623|gene4861|gene3557|gene3558|gene3559|gene2464|gene19495|gene1827|gene14258|gene1416	LOC106040258;DCTN4;LOC106031353;LOC106031351;LOC106031352;CREB5;RAB25;LOC106047885;NOP56;CREB3L1
2	map00130	Ubiquinone and other terpenoid-quinone biosynthesis	KEGG PATHWAY	2/2644	9/11318	0.658663	1	Metabolism	Metabolism of cofactors and vitamins	gene17334|gene5444	NQO1;COQ7
20	map05210	Colorectal cancer	KEGG PATHWAY	20/2644	91/11318	0.662481	1	Human Diseases	Cancer: specific types	gene17031|gene6988|gene15282|gene7610|gene8056|gene10159|gene15614|gene13079|gene19020|gene2120|gene4032|gene15094|gene4965|gene16898|gene9948|gene4772|gene10304|gene13078|gene14202|gene5078	TGFA;CASP3;PIK3CD;BLNK10;PMAIP1;LEF1;LOC106044678;EREG;LOC10602987820;LOC106029911;TCF7L2;RALGDS;JUN;BAK1;MYC;HPSE272;FOS;AREG;MSH2;PIK3R3
29	map04611	Platelet activation	KEGG PATHWAY	29/2644	131/11318	0.663408	1	Organismal Systems	Immune system	gene15614|gene5700|gene4367|gene5078|gene1358|gene1359|gene6455|gene16763|gene1164|gene1356|gene13258|gene6211|gene15282|gene10714|gene2105|gene3225|gene16004|gene7316|gene10996|gene12197|gene1361|gene1360|gene1362|gene1364|gene10970|gene7346|gene9293|gene19518|gene10479	LOC106044678;TLN2;GUCY1A3;PIK3R3;LOC106042968;LOC106042978;GNA13;ITGB3;LOC106041081;PLA2G4F;CXCL1258;LCP2;PIK3CD;GP5;ADCY5;TBXAS1;SYK;GNAI1;MYLK3;SRC;LOC106043002;LOC106042985;LOC106042972;LOC106040722;ADCY7;ITGA2;GPR1613;MYLK4;LYN
31	map04068	FoxO signaling pathway	KEGG PATHWAY	31/2644	140/11318	0.666003	1	Environmental Information Processing	Signal transduction	gene15854|gene5647|gene19020|gene2407|gene10060|gene8030|gene15751|gene15402|gene4107|gene5078|gene15282|gene4637|gene1484|gene1485|gene16810|gene7933|gene1504|gene13237|gene2120|gene14419|gene4973|gene12791|gene1157|gene8025|gene5106|gene7519|gene208|gene20037|gene20058|gene13228|gene15871	INSR;CCNB2;LOC10602987820;IL6;IRS4;IL7R;BCL6;IRS2;TNFSF10;PIK3R3;PIK3CD;FOXO3;RAG2;RAG1;PLK1;IRS1;CAT;CXCL1237;LOC106029911;HOMER2;PRKAA2;FASLG;STK4;LOC106036387;PLK3;IGF1;LOC106030078;CCNB3;MRPL148;CXCL1228;LOC10604815371
25	map04722	Neurotrophin signaling pathway	KEGG PATHWAY	25/2644	114/11318	0.676787	1	Organismal Systems	Nervous system	gene15614|gene2012|gene13457|gene4965|gene2765|gene5078|gene15282|gene3299|gene4637|gene5780|gene7933|gene16484|gene16188|gene12791|gene15062|gene18515|gene17397|gene16250|gene7661|gene14154|gene8107|gene15263|gene10183|gene10253|gene8347	LOC106044678;NFKBIE;CAMK4;JUN;RIPK2;PIK3R3;PIK3CD;SH2B3;FOXO3;BDNF;IRS1;MATK;NFKB1;FASLG;ABL1;RPS6KA1;GAB1;NTRK2;BLNK61;LOC106043112;NTRK3;LOC106044308;LOC106038708;NFKBIA;IRAK2
7	map00052	Galactose metabolism	KEGG PATHWAY	7/2644	33/11318	0.680357	1	Metabolism	Carbohydrate metabolism	gene16452|gene10738|gene19453|gene13170|gene20011|gene3103|gene3107	UGP2;LCT;GCK;LOC106042005;LOC106049507;LOC106030914;LOC106030918
4	map04950	Maturity onset diabetes of the young	KEGG PATHWAY	4/2644	19/11318	0.680606	1	Human Diseases	Endocrine and metabolic disease	gene88|gene1172|gene4100|gene13125	HHEX;HNF4A;SLC2A2;NR5A2
17	map05220	Chronic myeloid leukemia	KEGG PATHWAY	17/2644	79/11318	0.692862	1	Human Diseases	Cancer: specific types	gene208|gene2120|gene15263|gene15062|gene10253|gene16898|gene19020|gene15282|gene14438|gene978|gene10428|gene9948|gene4080|gene16188|gene16021|gene5078|gene18392	LOC106030078;LOC106029911;LOC106044308;ABL1;NFKBIA;BAK1;LOC10602987820;PIK3CD;RUNX1;CBLB;CTBP2;MYC;MECOM;NFKB1;LOC106045119;PIK3R3;PSD92
25	map05231	Choline metabolism in cancer	KEGG PATHWAY	25/2644	115/11318	0.694788	1	Human Diseases	Cancer: overview	gene4965|gene4102|gene10861|gene5078|gene1358|gene1359|gene7610|gene15094|gene1356|gene11757|gene11578|gene1360|gene15282|gene4974|gene1362|gene1361|gene16437|gene20038|gene1364|gene4849|gene10304|gene6002|gene16801|gene10022|gene1417	JUN;PLD1;SLC44A3;PIK3R3;LOC106042968;LOC106042978;BLNK10;RALGDS;PLA2G4F;SLC44A1;DGKQ;LOC106042985;PIK3CD;PPAP2B;LOC106042972;LOC106043002;GPCPD1;LOC106049530;LOC106040722;PDGFRB;FOS;EVC2;PRKCB;LOC106038521;DGKZ
54	map04144	Endocytosis	KEGG PATHWAY	54/2644	244/11318	0.700562	1	Cellular Processes	Transport and catabolism	gene2468|gene5491|gene19495|gene3234|gene978|gene12024|gene5624|gene3488|gene15178|gene20337|gene19587|gene6318|gene6174|gene17587|gene15614|gene10215|gene19366|gene8543|gene9042|gene5195|gene10735|gene16183|gene11109|gene8833|gene17468|gene530|gene11426|gene2120|gene18638|gene12273|gene16692|gene17969|gene12033|gene8009|gene9870|gene6760|gene6506|gene9869|gene12795|gene9889|gene14601|gene183|gen…	WIPF3;CYTH3;RAB25;CCDC53;CBLB;LOC106040731;NEDD4;LOC106031282;PML;LOC106049848;VPS45;AGAP1;ARAP3;STAM2;LOC106044678;IL2RA;RAB4A;EEA1;IL2RG;PARD6A;CXCR4;PARD3;HSPA8;HSPA2;CYTH1;FGFR3;IQSEC1;LOC106029911;VPS25;NFATC23;LOC106045913;DNM1;MVB12B;DAB2;LOC106038357;RAB31;RAB11FIP4;LOC106038356;DNM3;LOC106038418;DNAJC6;PSD;PLD1;SH3GLB2;SRC;ADRBK1;BLNK06;PSD2;FGFR4;SH3GL2;GRK4;LOC106029505;RAB11FIP2;ERCC6…
9	map04340	Hedgehog signaling pathway	KEGG PATHWAY	9/2644	43/11318	0.703526	1	Environmental Information Processing	Signal transduction	gene929|gene20461|gene16992|gene11882|gene2087|gene4298|gene600|gene899|gene601	GPR161;ADRBK1;CSNK1G3;CDON;LOC1060300787;HHIP;EVC;BOC;EVC2
7	map00051	Fructose and mannose metabolism	KEGG PATHWAY	7/2644	34/11318	0.712306	1	Metabolism	Carbohydrate metabolism	gene16232|gene19453|gene20011|gene18098|gene13911|gene3103|gene3107	LOC106045365;GCK;LOC106049507;SORD;LOC106042848;LOC106030914;LOC106030918
4	map00511	Other glycan degradation	KEGG PATHWAY	4/2644	20/11318	0.721512	1	Metabolism	Glycan biosynthesis and metabolism	gene17463|gene591|gene10638|gene19078	ENGASE;LOC106035038;NEU4;LOC10602987878
18	map01522	Endocrine resistance	KEGG PATHWAY	18/2644	85/11318	0.722943	1	Human Diseases	Drug resistance: antineoplastic	gene7519|gene12773|gene17850|gene5530|gene10970|gene15282|gene14183|gene19020|gene4965|gene13840|gene2105|gene18051|gene10304|gene16021|gene5032|gene5078|gene12197|gene18392	IGF1;NOTCH2;MMP9;GPER1;ADCY7;PIK3CD;MMP2;LOC10602987820;JUN;HBEGF;ADCY5;CARM1;FOS;LOC106045119;CDKN2C;PIK3R3;SRC;PSD92
17	map04727	GABAergic synapse	KEGG PATHWAY	17/2644	81/11318	0.73373	1	Organismal Systems	Nervous system	gene1792|gene2105|gene8697|gene5926|gene10970|gene18710|gene2995|gene2993|gene14137|gene16801|gene6247|gene6243|gene9275|gene16949|gene7316|gene7691|gene12197	SLC38A2;ADCY5;LOC106037044;GNG5;ADCY7;GAD2;GABRA4;GABRA2;GNAO1;PRKCB;GABRB2;GABRA1;GABRE;CACNA1S;GNAI1;BLNK91;SRC
1	map00232	Caffeine metabolism	KEGG PATHWAY	1/2644	5/11318	0.735679	1	Metabolism	Biosynthesis of other secondary metabolites	gene5923	LOC106033995
15	map04917	Prolactin signaling pathway	KEGG PATHWAY	15/2644	72/11318	0.736742	1	Organismal Systems	Endocrine system	gene4749|gene4637|gene6887|gene17471|gene15282|gene13920|gene14211|gene8032|gene4100|gene16188|gene10304|gene12442|gene5078|gene12197|gene11333	IRF1;FOXO3;TNFSF11;SOCS3;PIK3CD;CISH;LHCGR;PRLR;SLC2A2;NFKB1;FOS;SOCS1;PIK3R3;SRC;STAT1
20	map04974	Protein digestion and absorption	KEGG PATHWAY	20/2644	95/11318	0.739933	1	Organismal Systems	Digestive system	gene19934|gene10169|gene9578|gene17377|gene3916|gene15122|gene10171|gene2590|gene10062|gene13482|gene18649|gene16418|gene2031|gene6331|gene3981|gene1792|gene20084|gene3608|gene3609|gene9717	LOC106049424;LOC106038763;COL7A1;COL6A6;SLC15A1;LOC106044084;LOC106038694;COL12A1;COL4A6;KCNE3;PRCP;SLC8A1;KCNK5;COL6A3;COL17A1;SLC38A2;COL2A1;SLC3A1;LOC106031475;LOC106038159
27	map04152	AMPK signaling pathway	KEGG PATHWAY	27/2644	127/11318	0.74466	1	Environmental Information Processing	Signal transduction	gene15854|gene17498|gene6843|gene13574|gene2464|gene10060|gene15402|gene5078|gene10590|gene4637|gene10250|gene7933|gene679|gene3414|gene3267|gene16232|gene4973|gene15282|gene172|gene7318|gene9889|gene3131|gene7519|gene1172|gene11395|gene13911|gene1416	INSR;FASN;CAB39L;CCNA2;CREB5;IRS4;IRS2;PIK3R3;PPP2R3A;FOXO3;PPP2R3C;IRS1;PPARGC1A;ULK1;ACACB;LOC106045365;PRKAA2;PIK3CD;SCD;CD36;LOC106038418;DNA21;IGF1;HNF4A;LOC106040019;LOC106042848;CREB3L1
16	map04013	MAPK signaling pathway - fly	KEGG PATHWAY	16/2644	77/11318	0.744994	1	Environmental Information Processing	Signal transduction	gene19016|gene7841|gene3709|gene15263|gene13304|gene4965|gene17547|gene18099|gene8304|gene8156|gene4218|gene11894|gene14075|gene15397|gene12197|gene9366	LOC10602987816;ETS2;DUSP10;LOC106044308;LOC106042201;JUN;TBX2;DUOX2;XPO1;MEF2A;MAP2K3;ETS1;LOC106042970;LOC106044391;SRC;CNKSR2
9	map00270	Cysteine and methionine metabolism	KEGG PATHWAY	9/2644	45/11318	0.756151	1	Metabolism	Amino acid metabolism	gene20429|gene7603|gene5961|gene19449|gene16324|gene9371|gene1888|gene20276|gene4615	IL4I1;BLNK03;CCBL2;MAT2A;BCAT1;SMS;MTR;S1PR2;AMD1
5	map00534	Glycosaminoglycan biosynthesis - heparan sulfate / heparin	KEGG PATHWAY	5/2644	26/11318	0.76086	1	Metabolism	Glycan biosynthesis and metabolism	gene10004|gene5436|gene10117|gene20821|gene11647	EXT1;XYLT1;NDST4;LOC10603007821;HS6ST1
51	map05131	Shigellosis	KEGG PATHWAY	51/2644	237/11318	0.773109	1	Human Diseases	Infectious disease: bacterial	gene16487|gene10808|gene15614|gene14180|gene4965|gene5700|gene12024|gene5185|gene12305|gene3669|gene12857|gene5078|gene5347|gene17626|gene4637|gene17769|gene17768|gene9200|gene10253|gene8744|gene20146|gene16188|gene3696|gene10440|gene1568|gene12292|gene20213|gene11717|gene15062|gene17378|gene3700|gene1496|gene11169|gene12197|gene14154|gene15282|gene1497|gene16293|gene18748|gene208|gene19373|gene2…	LOC106045683;PLCD4;LOC106044678;LOC106043079;JUN;TLN2;LOC106040731;LOC106033294;LOC106041090;TRAF5;LOC106041672;PIK3R3;SEPT12;PLCD3;FOXO3;LOC106047052;LOC106047050;SEPT6;NFKBIA;TRAF2;LOC106049641;NFKB1;CAPN2;DOCK1;LOC106045117;LOC106041040;IL1B;LOC106040409;ABL1;PIK3R4;TLR5;CD44;IL18;SRC;LOC106043112;PIK3CD;LOC106044451;MYL9;LOC106048163;LOC106030078;CAST;MB21D1;GCK;SQSTM1;PXN;PRKCQ;LOC106033293;…
8	map00260	Glycine, serine and threonine metabolism	KEGG PATHWAY	8/2644	41/11318	0.774616	1	Metabolism	Amino acid metabolism	gene7627|gene17125|gene19474|gene13239|gene4250|gene5309|gene12631|gene15113	BLNK27;GLDC;CHDH;CXCL1239;SHMT1;GCSH;PSPH;SARDH
15	map05212	Pancreatic cancer	KEGG PATHWAY	15/2644	74/11318	0.775763	1	Human Diseases	Cancer: specific types	gene17031|gene15282|gene7610|gene16898|gene2120|gene19020|gene15094|gene4102|gene208|gene17737|gene16188|gene16021|gene11333|gene5078|gene18392	TGFA;PIK3CD;BLNK10;BAK1;LOC106029911;LOC10602987820;RALGDS;PLD1;LOC106030078;RAD51;NFKB1;LOC106045119;STAT1;PIK3R3;PSD92
12	map04918	Thyroid hormone synthesis	KEGG PATHWAY	12/2644	60/11318	0.775903	1	Organismal Systems	Endocrine system	gene5015|gene10970|gene930|gene2464|gene7530|gene4862|gene2105|gene12027|gene7661|gene16801|gene15495|gene1416	GPX7;ADCY7;LOC106037084;CREB5;HSP90B1;GPX3;ADCY5;HSPA5;BLNK61;PRKCB;TSHR;CREB3L1
9	map04979	Cholesterol metabolism	KEGG PATHWAY	9/2644	46/11318	0.779869	1	Organismal Systems	Digestive system	gene4109|gene19549|gene16896|gene16473|gene218|gene13629|gene7318|gene11205|gene17847	NCEH1;LRP1;LOC106046185;ANGPTL4;LOC106030157;SOAT1;CD36;LOC106039769;PLTP
27	map04371	Apelin signaling pathway	KEGG PATHWAY	27/2644	130/11318	0.788219	1	Environmental Information Processing	Signal transduction	gene4693|gene13457|gene8156|gene6629|gene6455|gene15338|gene7870|gene6291|gene679|gene15871|gene4973|gene17378|gene5926|gene16029|gene2105|gene4522|gene16418|gene12192|gene7316|gene10996|gene10183|gene18210|gene8086|gene19518|gene17324|gene10970|gene17323	EGR1;CAMK4;MEF2A;SPHK1;GNA13;PLAT;AGTR1;HDAC4;PPARGC1A;LOC10604815371;PRKAA2;PIK3R4;GNG5;LOC106045149;ADCY5;CTGF;SLC8A1;PDE3B;GNAI1;MYLK3;LOC106038708;MEF2C;PLIN1;MYLK4;LOC106046593;ADCY7;LOC106046592
6	map04710	Circadian rhythm	KEGG PATHWAY	6/2644	32/11318	0.792181	1	Organismal Systems	Environmental adaptation	gene9224|gene16888|gene4973|gene19598|gene16515|gene8380	PASD1;LOC106046187;PRKAA2;NPAS2;LOC106045650;BHLHE40
10	map04330	Notch signaling pathway	KEGG PATHWAY	10/2644	52/11318	0.80584	1	Environmental Information Processing	Signal transduction	gene12773|gene8062|gene7614|gene2495|gene16381|gene2815|gene6031|gene10428|gene700|gene1334	NOTCH2;LOC106036305;BLNK14;KAT2B;DTX1;HEY1;MAML2;CTBP2;RBPJ;NUMB
24	map04926	Relaxin signaling pathway	KEGG PATHWAY	24/2644	118/11318	0.812025	1	Organismal Systems	Endocrine system	gene14183|gene4965|gene9326|gene17850|gene5078|gene10253|gene18170|gene16188|gene2120|gene2464|gene15282|gene5926|gene10062|gene10970|gene7661|gene7316|gene12197|gene8042|gene2105|gene10304|gene14137|gene6006|gene6009|gene1416	MMP2;JUN;FIGF;MMP9;PIK3R3;NFKBIA;LOC106047519;NFKB1;LOC106029911;CREB5;PIK3CD;GNG5;COL4A6;ADCY7;BLNK61;GNAI1;SRC;RXFP3;ADCY5;FOS;GNAO1;EVC6;EVC9;CREB3L1
5	map00100	Steroid biosynthesis	KEGG PATHWAY	5/2644	28/11318	0.817601	1	Metabolism	Lipid metabolism	gene13629|gene218|gene3687|gene4423|gene5863	SOAT1;LOC106030157;LBR;MSMO1;LOC106033854
3	map00360	Phenylalanine metabolism	KEGG PATHWAY	3/2644	18/11318	0.82798	1	Metabolism	Amino acid metabolism	gene20429|gene7523|gene18846	IL4I1;PAH;LOC106048260
16	map04925	Aldosterone synthesis and secretion	KEGG PATHWAY	16/2644	82/11318	0.830517	1	Organismal Systems	Endocrine system	gene16632|gene10183|gene16801|gene10970|gene2464|gene13457|gene16949|gene2105|gene15538|gene7661|gene18365|gene3857|gene7870|gene14895|gene1416|gene4257	ATP2B4;LOC106038708;PRKCB;ADCY7;CREB5;CAMK4;CACNA1S;ADCY5;AGT;BLNK61;PSD65;PRKD1;AGTR1;NR4A2;CREB3L1;CACNA1H
12	map04622	RIG-I-like receptor signaling pathway	KEGG PATHWAY	12/2644	63/11318	0.831282	1	Organismal Systems	Immune system	gene17686|gene13264|gene13265|gene10253|gene8744|gene13304|gene12557|gene208|gene18619|gene16188|gene11576|gene3889	TRAF3;CXCL1264;CXCL1265;NFKBIA;TRAF2;LOC106042201;IKBKE;LOC106030078;LOC106047988;NFKB1;DDX58;IRF7
7	map00620	Pyruvate metabolism	KEGG PATHWAY	7/2644	39/11318	0.83897	1	Metabolism	Carbohydrate metabolism	gene3267|gene16586|gene16587|gene3295|gene20768|gene4279|gene13409	ACACB;LOC106045763;LOC106045817;ALDH2;LOC106029637;HAGH;ACYP2
8	map00830	Retinol metabolism	KEGG PATHWAY	8/2644	44/11318	0.83955	1	Metabolism	Metabolism of cofactors and vitamins	gene15194|gene197|gene20701|gene20702|gene4186|gene16712|gene11833|gene14975	LOC106044188;LOC106034197;LOC106029566;LOC106029567;LOC106032071;LOC106045912;PNPLA4;LOC1060444515
5	map00860	Porphyrin and chlorophyll metabolism	KEGG PATHWAY	5/2644	29/11318	0.841622	1	Metabolism	Metabolism of cofactors and vitamins	gene18333|gene14975|gene12624|gene16397|gene7584	CP;LOC1060444515;GUSB;HEPH;HMOX1
1	map00440	Phosphonate and phosphinate metabolism	KEGG PATHWAY	1/2644	7/11318	0.844796	1	Metabolism	Metabolism of other amino acids	gene16891	CEPT1
11	map05213	Endometrial cancer	KEGG PATHWAY	11/2644	59/11318	0.844833	1	Human Diseases	Cancer: specific types	gene4637|gene10159|gene16898|gene19020|gene15282|gene4032|gene9948|gene4772|gene17324|gene5078|gene17323	FOXO3;LEF1;BAK1;LOC10602987820;PIK3CD;TCF7L2;MYC;HPSE272;LOC106046593;PIK3R3;LOC106046592
4	map00515	Mannose type O-glycan biosynthesis	KEGG PATHWAY	4/2644	24/11318	0.846396	1	Metabolism	Glycan biosynthesis and metabolism	gene9051|gene6929|gene6041|gene863	ISPD;POMK;FUT4;B4GALT3
3	map00220	Arginine biosynthesis	KEGG PATHWAY	3/2644	19/11318	0.855613	1	Metabolism	Amino acid metabolism	gene8697|gene3800|gene15059	LOC106037044;ARG2;ASS1
11	map04927	Cortisol synthesis and secretion	KEGG PATHWAY	11/2644	60/11318	0.860307	1	Organismal Systems	Endocrine system	gene16949|gene10970|gene2464|gene2105|gene15538|gene7661|gene18365|gene7870|gene4109|gene1416|gene4257	CACNA1S;ADCY7;CREB5;ADCY5;AGT;BLNK61;PSD65;AGTR1;NCEH1;CREB3L1;CACNA1H
2	map00604	Glycosphingolipid biosynthesis - ganglio series	KEGG PATHWAY	2/2644	14/11318	0.87313	1	Metabolism	Glycan biosynthesis and metabolism	gene9722|gene16269	ST8SIA1;TNFRSF13C9
6	map00350	Tyrosine metabolism	KEGG PATHWAY	6/2644	36/11318	0.877652	1	Metabolism	Amino acid metabolism	gene20429|gene20701|gene20702|gene10328|gene18846|gene4280	IL4I1;LOC106029566;LOC106029567;GSTZ1;LOC106048260;FAHD1
27	map05160	Hepatitis C	KEGG PATHWAY	27/2644	138/11318	0.878755	1	Human Diseases	Infectious disease: viral	gene19675|gene12662|gene17471|gene12557|gene1969|gene12308|gene3889|gene5078|gene6988|gene10253|gene8744|gene9948|gene16188|gene6138|gene15282|gene17686|gene13709|gene11576|gene16898|gene12791|gene19851|gene16021|gene18392|gene208|gene19020|gene7825|gene11333	CLDN19;YWHAG;SOCS3;IKBKE;EIF2AK2;LOC106041034;IRF7;PIK3R3;CASP3;NFKBIA;TRAF2;MYC;NFKB1;CLDN20;PIK3CD;TRAF3;CD81;DDX58;BAK1;FASLG;CLDN10;LOC106045119;PSD92;LOC106030078;LOC10602987820;LOC106036132;STAT1
3	map03430	Mismatch repair	KEGG PATHWAY	3/2644	20/11318	0.879278	1	Genetic Information Processing	Replication and repair	gene1912|gene10566|gene14202	EXO1;RFC1;MSH2
3	map00532	Glycosaminoglycan biosynthesis - chondroitin sulfate / dermatan sulfate	KEGG PATHWAY	3/2644	20/11318	0.879278	1	Metabolism	Glycan biosynthesis and metabolism	gene16142|gene5436|gene290	CHSY3;XYLT1;CHST3
1	map04122	Sulfur relay system	KEGG PATHWAY	1/2644	8/11318	0.881076	1	Genetic Information Processing	Folding, sorting and degradation	gene7603	BLNK03
1	map04711	Circadian rhythm - fly	KEGG PATHWAY	1/2644	8/11318	0.881076	1	Organismal Systems	Environmental adaptation	gene6519	HLF
18	map04070	Phosphatidylinositol signaling system	KEGG PATHWAY	18/2644	96/11318	0.885762	1	Environmental Information Processing	Signal transduction	gene17626|gene20038|gene14041|gene10808|gene10183|gene11578|gene1417|gene15282|gene14042|gene12589|gene18766|gene12304|gene16801|gene6151|gene11669|gene3752|gene5078|gene18296	PLCD3;LOC106049530;CHST11;PLCD4;LOC106038708;DGKQ;DGKZ;PIK3CD;CHST12;PIK3C2B;CDS1;MTMR4;PRKCB;SYNJ2;INPP5D;ITPKB;PIK3R3;CDS2
11	map04137	Mitophagy - animal	KEGG PATHWAY	11/2644	62/11318	0.887568	1	Cellular Processes	Transport and catabolism	gene4637|gene12566|gene3434|gene4965|gene4580|gene4840|gene7661|gene1693|gene3414|gene12197|gene18392	FOXO3;RAB7B;PGAM5;JUN;CITED2;SQSTM1;BLNK61;TBC1D15;ULK1;SRC;PSD92
8	map04961	Endocrine and other factor-regulated calcium reabsorption	KEGG PATHWAY	8/2644	47/11318	0.888727	1	Organismal Systems	Excretory system	gene16632|gene19495|gene12795|gene17969|gene16418|gene16801|gene20082|gene17531	ATP2B4;RAB25;DNM3;DNM1;SLC8A1;PRKCB;VDR;PTH1R
13	map04911	Insulin secretion	KEGG PATHWAY	13/2644	72/11318	0.888957	1	Organismal Systems	Endocrine system	gene11623|gene16949|gene7323|gene10970|gene2464|gene1901|gene2105|gene4100|gene2158|gene16801|gene7661|gene4127|gene1416	LOC106040258;CACNA1S;PCLO;ADCY7;CREB5;LOC1060298781;ADCY5;SLC2A2;GCG;PRKCB;BLNK61;LOC106032022;CREB3L1
14	map04970	Salivary secretion	KEGG PATHWAY	14/2644	77/11318	0.890025	1	Organismal Systems	Digestive system	gene11623|gene16632|gene16801|gene1716|gene10970|gene19256|gene10183|gene1901|gene2105|gene19273|gene4367|gene19871|gene15683|gene19872	LOC106040258;ATP2B4;PRKCB;LYZ;ADCY7;PIK3AP156;LOC106038708;LOC1060298781;ADCY5;LOC106048722;GUCY1A3;LOC106049351;LOC1060451173;LOC106049352
6	map00760	Nicotinate and nicotinamide metabolism	KEGG PATHWAY	6/2644	37/11318	0.893685	1	Metabolism	Metabolism of cofactors and vitamins	gene2984|gene13146|gene15914|gene13726|gene14753|gene18607	LOC106030817;NAMPT;NMRK2;LOC106042626;NUDT12;NT5C3B
10	map03460	Fanconi anemia pathway	KEGG PATHWAY	10/2644	58/11318	0.899765	1	Genetic Information Processing	Replication and repair	gene19919|gene16927|gene16887|gene18014|gene18818|gene540|gene1996|gene17737|gene4609|gene539	FAAP100;FANCE;UBE2T;FANCC;FANCB;HAUS3;POLH;RAD51;REV3L;POLN
63	map05010	Alzheimer disease	KEGG PATHWAY	63/2644	308/11318	0.903021	1	Human Diseases	Neurodegenerative disease	gene5643|gene15854|gene12283|gene16220|gene19671|gene18995|gene3401|gene18661|gene11436|gene1901|gene2407|gene10060|gene4738|gene1969|gene15402|gene16684|gene20089|gene13414|gene5078|gene16171|gene13515|gene20213|gene16588|gene8744|gene7933|gene18485|gene8702|gene16188|gene8439|gene3696|gene3414|gene8728|gene8965|gene20863|gene19549|gene13212|gene17378|gene10796|gene20864|gene3348|gene12427|gene1…	ADAM10;INSR;FZD9;DKK2;WNT4;CSF1;FZD10;FZD4;WNT7A;LOC1060298781;IL6;IRS4;HPSE238;EIF2AK2;IRS2;LOC106045884;DDIT3;RTN4;PIK3R3;FZD8;WNT11;IL1B;ULK2;TRAF2;IRS1;LOC106047829;TUBB4B;NFKB1;WNT3A;CAPN2;ULK1;GRIN1;NOX1;LOC10603007863;LRP1;CXCL1212;PIK3R4;WNT10A;LOC10603007864;LOC106031415;GRIN2A;WNT2B;BLNK61;WNT6;LOC106036305;WNT5A;LOC106045569;FZD2;PIK3CD;TUBB6;CASP3;FZD3;CXCL1288;LOC106038708;LOC1060300…
6	map00630	Glyoxylate and dicarboxylate metabolism	KEGG PATHWAY	6/2644	38/11318	0.907889	1	Metabolism	Carbohydrate metabolism	gene17125|gene8697|gene5309|gene4250|gene1504|gene10588	GLDC;LOC106037044;GCSH;SHMT1;CAT;PCCB
12	map05214	Glioma	KEGG PATHWAY	12/2644	69/11318	0.910063	1	Human Diseases	Cancer: specific types	gene17031|gene7519|gene4849|gene10183|gene16898|gene19020|gene15282|gene13457|gene16801|gene16021|gene5078|gene18392	TGFA;IGF1;PDGFRB;LOC106038708;BAK1;LOC10602987820;PIK3CD;CAMK4;PRKCB;LOC106045119;PIK3R3;PSD92
11	map04976	Bile secretion	KEGG PATHWAY	11/2644	64/11318	0.910317	1	Organismal Systems	Digestive system	gene10970|gene18879|gene10093|gene13059|gene2105|gene170|gene3774|gene5639|gene4109|gene10777|gene3683	ADCY7;ACTN29;LOC106038686;ABCG2;ADCY5;LOC106049164;SLC10A1;AQP9;NCEH1;SCTR;EPHX1
12	map04971	Gastric acid secretion	KEGG PATHWAY	12/2644	70/11318	0.919613	1	Organismal Systems	Digestive system	gene826|gene4930|gene7843|gene10183|gene1901|gene2105|gene19518|gene16801|gene10970|gene7316|gene10996|gene6432	KCNK10;HRH2;KCNJ15;LOC106038708;LOC1060298781;ADCY5;MYLK4;PRKCB;ADCY7;GNAI1;MYLK3;SSTR2
1	map00740	Riboflavin metabolism	KEGG PATHWAY	1/2644	10/11318	0.930181	1	Metabolism	Metabolism of cofactors and vitamins	gene15424	LOC106044464
10	map00010	Glycolysis / Gluconeogenesis	KEGG PATHWAY	10/2644	61/11318	0.930243	1	Metabolism	Carbohydrate metabolism	gene16232|gene20701|gene20702|gene16586|gene16587|gene3295|gene18846|gene20768|gene20011|gene19453	LOC106045365;LOC106029566;LOC106029567;LOC106045763;LOC106045817;ALDH2;LOC106048260;LOC106029637;LOC106049507;GCK
13	map04721	Synaptic vesicle cycle	KEGG PATHWAY	13/2644	77/11318	0.935514	1	Organismal Systems	Nervous system	gene10243|gene11623|gene2944|gene8686|gene14247|gene19563|gene5612|gene14178|gene12795|gene3373|gene17969|gene1662|gene16119	LOC106038813;LOC106040258;ATP6V1C2;ATP6V1G1;ATP6V1B1;SLC6A9;UNC13C;DGKZ8;DNM3;TCTN2;DNM1;SYT1;SLC18A2
25	map00230	Purine metabolism	KEGG PATHWAY	25/2644	137/11318	0.939646	1	Metabolism	Nucleotide metabolism	gene16349|gene6535|gene3122|gene4367|gene14460|gene8074|gene12192|gene13049|gene4833|gene9706|gene7391|gene5923|gene2105|gene3044|gene13726|gene14604|gene1856|gene2935|gene8759|gene10970|gene226|gene14963|gene2984|gene7806|gene18607	PDE1C;LOC106034733;CECR1;GUCY1A3;LOC106043431;NPR2;PDE3B;NUDT9;LOC106032673;ENPP4;PDE4D;LOC106033995;ADCY5;PPAT;LOC106042626;PDE4B;NTPCR;RRM2;ENTPD2;ADCY7;PAPSS2;CD443;LOC106030817;LGMN6;NT5C3B
6	map00500	Starch and sucrose metabolism	KEGG PATHWAY	6/2644	41/11318	0.941073	1	Metabolism	Carbohydrate metabolism	gene16452|gene18337|gene19453|gene20011|gene13170|gene1108	UGP2;PSD37;GCK;LOC106049507;LOC106042005;GBE1
6	map00640	Propanoate metabolism	KEGG PATHWAY	6/2644	41/11318	0.941073	1	Metabolism	Carbohydrate metabolism	gene19149|gene3267|gene20447|gene10588|gene10595|gene576	BCKDHB;ACACB;LOC106049951;PCCB;EHHADH;ACOX3
18	map04713	Circadian entrainment	KEGG PATHWAY	18/2644	103/11318	0.941591	1	Organismal Systems	Environmental adaptation	gene12762|gene4233|gene9227|gene4881|gene10183|gene5926|gene12427|gene6965|gene2105|gene14137|gene4367|gene16801|gene11991|gene10970|gene7316|gene10304|gene8728|gene4257	NOS1AP;RASD1;GPR50;GRIA1;LOC106038708;GNG5;GRIN2A;MTNR1A;ADCY5;GNAO1;GUCY1A3;PRKCB;LOC106040661;ADCY7;GNAI1;FOS;GRIN1;CACNA1H
25	map04910	Insulin signaling pathway	KEGG PATHWAY	25/2644	139/11318	0.949541	1	Organismal Systems	Endocrine system	gene15854|gene17498|gene17471|gene10060|gene15402|gene5078|gene16856|gene14041|gene1214|gene5520|gene7933|gene4973|gene12442|gene679|gene5867|gene3267|gene16232|gene13149|gene15282|gene978|gene12192|gene10183|gene14042|gene19453|gene20011	INSR;FASN;SOCS3;IRS4;IRS2;PIK3R3;PPP1R3B;CHST11;PTPN1;PRKAR1B;IRS1;PRKAA2;SOCS1;PPARGC1A;PTPRF;ACACB;LOC106045365;PRKAR2B;PIK3CD;CBLB;PDE3B;LOC106038708;CHST12;GCK;LOC106049507
4	map04130	SNARE interactions in vesicular transport	KEGG PATHWAY	4/2644	31/11318	0.952843	1	Genetic Information Processing	Folding, sorting and degradation	gene10962|gene11623|gene12772|gene17423	STX11;LOC106040258;SEC22B;STX8
22	map04140	Autophagy - animal	KEGG PATHWAY	22/2644	126/11318	0.957273	1	Cellular Processes	Transport and catabolism	gene12304|gene10067|gene9991|gene10060|gene15402|gene13513|gene5078|gene16588|gene7933|gene3414|gene15282|gene16236|gene12566|gene4973|gene17378|gene5711|gene6488|gene4840|gene10220|gene15892|gene12086|gene17535	MTMR4;LOC106038552;DEPTOR;IRS4;IRS2;UVRAG;PIK3R3;ULK2;IRS1;ULK1;PIK3CD;DAPK1;RAB7B;PRKAA2;PIK3R4;DAPK2;ERN1;SQSTM1;PRKCQ;LOC106044971;LOC106040774;VMP1
23	map04142	Lysosome	KEGG PATHWAY	23/2644	131/11318	0.95747	1	Cellular Processes	Transport and catabolism	gene3356|gene829|gene3232|gene3373|gene9245|gene6928|gene6451|gene218|gene462|gene19078|gene19789|gene7955|gene780|gene14924|gene11773|gene7034|gene4152|gene1752|gene18040|gene15892|gene13912|gene20267|gene12624	ABCB9;GALC;GNPTAB;TCTN2;IDS;HGSNAT;ARSG;LOC106030157;AP3M1;LOC10602987878;LOC10603419789;AP1S3;LGMN;CLN5;IDUA;LAPTM4B;LAMP3;GNS;LOC106047369;LOC106044971;LOC106042799;TPP1;GUSB
15	map04540	Gap junction	KEGG PATHWAY	15/2644	91/11318	0.958186	1	Cellular Processes	Cellular community - eukaryotes	gene6775|gene349|gene4849|gene14118|gene15729|gene6855|gene2105|gene8702|gene6002|gene16684|gene16801|gene10970|gene7316|gene12197|gene4367	TUBB6;CDK1;PDGFRB;LPAR1;HTR2B;HTR2A;ADCY5;TUBB4B;EVC2;LOC106045884;PRKCB;ADCY7;GNAI1;SRC;GUCY1A3
7	map04975	Fat digestion and absorption	KEGG PATHWAY	7/2644	49/11318	0.959564	1	Organismal Systems	Digestive system	gene12296|gene19445|gene4974|gene7318|gene11513|gene13512|gene11205	LOC106041043;NPC1L1;PPAP2B;CD36;LOC106040243;DGAT2;LOC106039769
12	map05211	Renal cell carcinoma	KEGG PATHWAY	12/2644	76/11318	0.960637	1	Human Diseases	Cancer: specific types	gene17031|gene17756|gene14389|gene15263|gene7321|gene7841|gene15282|gene17397|gene19020|gene4965|gene11894|gene5078	TGFA;PAK6;ARNT2;LOC106044308;HGF;ETS2;PIK3CD;GAB1;LOC10602987820;JUN;ETS1;PIK3R3
23	map04261	Adrenergic signaling in cardiomyocytes	KEGG PATHWAY	23/2644	132/11318	0.961392	1	Organismal Systems	Circulatory system	gene2464|gene4209|gene14443|gene16176|gene10590|gene989|gene10250|gene7322|gene9021|gene7870|gene3842|gene3348|gene2105|gene15538|gene7661|gene16418|gene7316|gene16632|gene10183|gene16803|gene10970|gene16949|gene1416	CREB5;LOC106032083;KCNE1;CREM;PPP2R3A;MYH15;PPP2R3C;CACNA2D1;AGTR2;AGTR1;ACTC1;LOC106031415;ADCY5;AGT;BLNK61;SLC8A1;GNAI1;ATP2B4;LOC106038708;CACNG3;ADCY7;CACNA1S;CREB3L1
11	map00310	Lysine degradation	KEGG PATHWAY	11/2644	71/11318	0.961898	1	Metabolism	Amino acid metabolism	gene16994|gene5721|gene18637|gene16522|gene16586|gene16587|gene3295|gene20768|gene18174|gene10595|gene5969	PRDM6;HYKK;EZH1;DOT1L;LOC106045763;LOC106045817;ALDH2;LOC106029637;TMLHE;EHHADH;WFS19
3	map00563	Glycosylphosphatidylinositol (GPI)-anchor biosynthesis	KEGG PATHWAY	3/2644	27/11318	0.968394	1	Metabolism	Glycan biosynthesis and metabolism	gene9325|gene12794|gene11355	PIGA;PIGC;PGAP1
4	map04215	Apoptosis - multiple species	KEGG PATHWAY	4/2644	34/11318	0.972715	1	Cellular Processes	Cell growth and death	gene6988|gene16898|gene10080|gene8056	CASP3;BAK1;XIAP;PMAIP1
6	map00970	Aminoacyl-tRNA biosynthesis	KEGG PATHWAY	6/2644	46/11318	0.973341	1	Genetic Information Processing	Translation	gene4981|gene3713|gene2015|gene16533|gene691|gene13696	PARS2;IARS2;AARS2;WARS2;SEPSECS;CARS
23	map04723	Retrograde endocannabinoid signaling	KEGG PATHWAY	23/2644	136/11318	0.974098	1	Organismal Systems	Nervous system	gene4881|gene7164|gene20855|gene5068|gene7316|gene9571|gene2995|gene2993|gene5990|gene20863|gene20864|gene5926|gene10970|gene5067|gene6247|gene9275|gene6243|gene9602|gene2105|gene14137|gene16475|gene16801|gene16949	GRIA1;CNR1;LOC10603007855;LOC106033086;GNAI1;ABHD6;GABRA4;GABRA2;PTGS2;LOC10603007863;LOC10603007864;GNG5;ADCY7;LOC106032948;GABRB2;GABRE;GABRA1;MGLL;ADCY5;GNAO1;NDUFA7;PRKCB;CACNA1S
1	map00730	Thiamine metabolism	KEGG PATHWAY	1/2644	14/11318	0.975944	1	Metabolism	Metabolism of cofactors and vitamins	gene1856	NTPCR
16	map04972	Pancreatic secretion	KEGG PATHWAY	16/2644	102/11318	0.978826	1	Organismal Systems	Digestive system	gene16632|gene15822|gene10169|gene19934|gene10970|gene10171|gene1901|gene15614|gene19495|gene3348|gene2105|gene5949|gene5948|gene16801|gene11513|gene10777	ATP2B4;RAB27B;LOC106038763;LOC106049424;ADCY7;LOC106038694;LOC1060298781;LOC106044678;RAB25;LOC106031415;ADCY5;LOC106034007;LOC106034001;PRKCB;LOC106040243;SCTR
3	map04341	Hedgehog signaling pathway - fly	KEGG PATHWAY	3/2644	29/11318	0.97892	1	Environmental Information Processing	Signal transduction	gene13875|gene556|gene16992	ERCC675;GRK4;CSNK1G3
11	map00562	Inositol phosphate metabolism	KEGG PATHWAY	11/2644	76/11318	0.980441	1	Metabolism	Carbohydrate metabolism	gene17626|gene14041|gene10808|gene14042|gene15282|gene12589|gene12304|gene6151|gene11669|gene3752|gene14581	PLCD3;CHST11;PLCD4;CHST12;PIK3CD;PIK3C2B;MTMR4;SYNJ2;INPP5D;ITPKB;PLCH1
16	map04725	Cholinergic synapse	KEGG PATHWAY	16/2644	103/11318	0.981226	1	Organismal Systems	Nervous system	gene15282|gene2598|gene10970|gene13457|gene10304|gene2464|gene1901|gene5926|gene14137|gene1416|gene2105|gene7661|gene16801|gene16949|gene7316|gene5078	PIK3CD;KCNQ5;ADCY7;CAMK4;FOS;CREB5;LOC1060298781;GNG5;GNAO1;CREB3L1;ADCY5;BLNK61;PRKCB;CACNA1S;GNAI1;PIK3R3
5	map00513	Various types of N-glycan biosynthesis	KEGG PATHWAY	5/2644	43/11318	0.983888	1	Metabolism	Glycan biosynthesis and metabolism	gene7446|gene16667|gene17713|gene11820|gene863	MGAT4A;LOC106045877;B4GALNT4;ALG12;B4GALT3
8	map04720	Long-term potentiation	KEGG PATHWAY	8/2644	61/11318	0.984776	1	Organismal Systems	Nervous system	gene10183|gene4881|gene13457|gene12427|gene7661|gene16801|gene18515|gene8728	LOC106038708;GRIA1;CAMK4;GRIN2A;BLNK61;PRKCB;RPS6KA1;GRIN1
21	map04919	Thyroid hormone signaling pathway	KEGG PATHWAY	21/2644	131/11318	0.985128	1	Organismal Systems	Endocrine system	gene4994|gene12773|gene2495|gene19671|gene16763|gene12815|gene15282|gene989|gene3348|gene17626|gene4209|gene9948|gene14442|gene18485|gene12197|gene16801|gene16365|gene11333|gene5078|gene15493|gene10808	DIO1;NOTCH2;KAT2B;WNT4;ITGB3;RXRG;PIK3CD;MYH15;LOC106031415;PLCD3;LOC106032083;MYC;RCAN1;LOC106047829;SRC;PRKCB;MED13L;STAT1;PIK3R3;DIO2;PLCD4
29	map04141	Protein processing in endoplasmic reticulum	KEGG PATHWAY	29/2644	172/11318	0.985608	1	Genetic Information Processing	Folding, sorting and degradation	gene11588|gene12027|gene4090|gene1969|gene20089|gene13539|gene18385|gene18771|gene16259|gene8744|gene17700|gene3696|gene5194|gene13022|gene19506|gene11109|gene16898|gene2555|gene7661|gene19854|gene8833|gene2637|gene6488|gene9370|gene1190|gene596|gene7530|gene12381|gene8169	DNAJA1;HSPA5;LOC106031985;EIF2AK2;DDIT3;HSPA4L;PSD85;LOC106048174;UBQLN1;TRAF2;HSP90AA1;CAPN2;HERPUD1;FAM175A;LOC106048968;HSPA8;BAK1;DNAJC1;BLNK61;UGGT2;HSPA2;BAG2;ERN1;MBTPS2;LOC106041315;WFS1;HSP90B1;HSPH1;VIMP
5	map03420	Nucleotide excision repair	KEGG PATHWAY	5/2644	45/11318	0.988789	1	Genetic Information Processing	Replication and repair	gene11583|gene10566|gene138|gene18126|gene15967	XPA;RFC1;ERCC6;POLE;XPC
2	map03060	Protein export	KEGG PATHWAY	2/2644	25/11318	0.988926	1	Genetic Information Processing	Folding, sorting and degradation	gene4090|gene12027	LOC106031985;HSPA5
9	map04260	Cardiac muscle contraction	KEGG PATHWAY	9/2644	69/11318	0.989308	1	Organismal Systems	Circulatory system	gene989|gene7322|gene3348|gene4209|gene16418|gene4738|gene16803|gene16949|gene3842	MYH15;CACNA2D1;LOC106031415;LOC106032083;SLC8A1;HPSE238;CACNG3;CACNA1S;ACTC1
14	map04922	Glucagon signaling pathway	KEGG PATHWAY	14/2644	97/11318	0.989629	1	Organismal Systems	Endocrine system	gene17479|gene11155|gene3267|gene16232|gene10183|gene4973|gene2464|gene2158|gene1416|gene4100|gene7661|gene12192|gene679|gene7793	GCGR;SIK2;ACACB;LOC106045365;LOC106038708;PRKAA2;CREB5;GCG;CREB3L1;SLC2A2;BLNK61;PDE3B;PPARGC1A;SIK1
2	map04136	Autophagy - other	KEGG PATHWAY	2/2644	26/11318	0.991217	1	Cellular Processes	Transport and catabolism	gene16588|gene17378	ULK2;PIK3R4
4	map03440	Homologous recombination	KEGG PATHWAY	4/2644	41/11318	0.99291	1	Genetic Information Processing	Replication and repair	gene9871|gene6352|gene13022|gene17737	TOPBP1;BARD1;FAM175A;RAD51
2	map04744	Phototransduction	KEGG PATHWAY	2/2644	27/11318	0.993043	1	Organismal Systems	Sensory system	gene6456|gene10183	RGS9;LOC106038708
21	map04932	Non-alcoholic fatty liver disease (NAFLD)	KEGG PATHWAY	21/2644	139/11318	0.994141	1	Human Diseases	Endocrine and metabolic disease	gene6988|gene15854|gene15282|gene20213|gene6488|gene17471|gene7933|gene12791|gene4965|gene2407|gene10060|gene8744|gene4973|gene7661|gene15402|gene4738|gene16188|gene20089|gene16475|gene5078|gene3131	CASP3;INSR;PIK3CD;IL1B;ERN1;SOCS3;IRS1;FASLG;JUN;IL6;IRS4;TRAF2;PRKAA2;BLNK61;IRS2;HPSE238;NFKB1;DDIT3;NDUFA7;PIK3R3;DNA21
2	map04745	Phototransduction - fly	KEGG PATHWAY	2/2644	28/11318	0.994496	1	Organismal Systems	Sensory system	gene20461|gene10183	ADRBK1;LOC106038708
2	map00030	Pentose phosphate pathway	KEGG PATHWAY	2/2644	28/11318	0.994496	1	Metabolism	Carbohydrate metabolism	gene3094|gene16232	DERA;LOC106045365
1	map04964	Proximal tubule bicarbonate reclamation	KEGG PATHWAY	1/2644	22/11318	0.997148	1	Organismal Systems	Excretory system	gene17556	CA4
15	map04728	Dopaminergic synapse	KEGG PATHWAY	15/2644	113/11318	0.997561	1	Organismal Systems	Nervous system	gene10250|gene10183|gene16119|gene4881|gene2464|gene5926|gene14137|gene2105|gene7661|gene12427|gene16801|gene10304|gene7316|gene1416|gene10590	PPP2R3C;LOC106038708;SLC18A2;GRIA1;CREB5;GNG5;GNAO1;ADCY5;BLNK61;GRIN2A;PRKCB;FOS;GNAI1;CREB3L1;PPP2R3A
4	map03022	Basal transcription factors	KEGG PATHWAY	4/2644	47/11318	0.997901	1	Genetic Information Processing	Transcription	gene16553|gene12341|gene12342|gene5678	GTF2E1;GTF2I;GTF2IRD1;GTF2A2
29	map04530	Tight junction	KEGG PATHWAY	29/2644	191/11318	0.998157	1	Cellular Processes	Cellular community - eukaryotes	gene19675|gene15946|gene15614|gene4965|gene5624|gene16684|gene12308|gene4734|gene17870|gene20593|gene17879|gene12635|gene1990|gene17645|gene6138|gene5195|gene2360|gene16183|gene4973|gene14438|gene19851|gene7238|gene12197|gene20322|gene6562|gene16293|gene18748|gene5533|gene16388	CLDN19;EPB41L4B;LOC106044678;JUN;NEDD4;LOC106045884;LOC106041034;HPSE234;LOC106047195;LOC106029451;LOC106047203;LOC106041489;TJAP1;ACTR3B;CLDN20;PARD6A;MPP4;PARD3;PRKAA2;RUNX1;CLDN10;MAGI1;SRC;CGN;LOC106034617;MYL9;LOC106048163;MICALL2;LOC106045529
13	map04066	HIF-1 signaling pathway	KEGG PATHWAY	13/2644	104/11318	0.998288	1	Environmental Information Processing	Signal transduction	gene7519|gene16801|gene13288|gene15854|gene15282|gene19020|gene2407|gene20011|gene19453|gene16188|gene7584|gene10626|gene5078	IGF1;PRKCB;CXCL1288;INSR;PIK3CD;LOC10602987820;IL6;LOC106049507;GCK;NFKB1;HMOX1;TF;PIK3R3
4	map05110	Vibrio cholerae infection	KEGG PATHWAY	4/2644	48/11318	0.998294	1	Human Diseases	Infectious disease: bacterial	gene14247|gene3373|gene2944|gene8686	ATP6V1B1;TCTN2;ATP6V1C2;ATP6V1G1
4	map00510	N-Glycan biosynthesis	KEGG PATHWAY	4/2644	48/11318	0.998294	1	Metabolism	Glycan biosynthesis and metabolism	gene7446|gene16667|gene11820|gene863	MGAT4A;LOC106045877;ALG12;B4GALT3
19	map04120	Ubiquitin mediated proteolysis	KEGG PATHWAY	19/2644	140/11318	0.998727	1	Genetic Information Processing	Folding, sorting and degradation	gene8763|gene15178|gene16847|gene3340|gene19619|gene17471|gene347|gene10080|gene978|gene16499|gene8025|gene4338|gene5624|gene2505|gene10599|gene12883|gene12442|gene6630|gene5872	LOC106037125;PML;LOC106046070;ANAPC5;CDC34;SOCS3;RHOBTB1;XIAP;CBLB;FZR1;LOC106036387;LOC106032252;NEDD4;LOC106030278;ANAPC13;NHLRC1;SOCS1;UBE2O;CDC20
1	map00020	Citrate cycle (TCA cycle)	KEGG PATHWAY	1/2644	31/11318	0.999741	1	Metabolism	Carbohydrate metabolism	gene390	OGDHL
5	map03018	RNA degradation	KEGG PATHWAY	5/2644	67/11318	0.999856	1	Genetic Information Processing	Folding, sorting and degradation	gene4828|gene11359|gene16639|gene3127|gene8541	CNOT6;HSPD1;BTG2;LOC106030932;BTG1
27	map04714	Thermogenesis	KEGG PATHWAY	27/2644	201/11318	0.999866	1	Organismal Systems	Environmental adaptation	gene19553|gene2464|gene7164|gene2158|gene20855|gene4738|gene9769|gene6985|gene15359|gene679|gene2716|gene4973|gene10056|gene18515|gene20863|gene20864|gene1381|gene10970|gene3893|gene9602|gene2105|gene4029|gene4218|gene16475|gene8086|gene712|gene1416	SMARCD3;CREB5;CNR1;GCG;LOC10603007855;HPSE238;LOC106038244;ACSL1;FGFR1;PPARGC1A;NDUFAF6;PRKAA2;ACSL4;RPS6KA1;LOC10603007863;LOC10603007864;NDUFAF1;ADCY7;PNPLA2;MGLL;ADCY5;ACSL5;MAP2K3;NDUFA7;PLIN1;SLC25A29;CREB3L1
1	map03050	Proteasome	KEGG PATHWAY	1/2644	37/11318	0.999948	1	Genetic Information Processing	Folding, sorting and degradation	gene5721	HYKK
10	map00190	Oxidative phosphorylation	KEGG PATHWAY	10/2644	108/11318	0.999962	1	Metabolism	Energy metabolism	gene2944|gene8686|gene14247|gene11942|gene20863|gene20864|gene16475|gene20855|gene4738|gene3373	ATP6V1C2;ATP6V1G1;ATP6V1B1;ATP12A;LOC10603007863;LOC10603007864;NDUFA7;LOC10603007855;HPSE238;TCTN2
11	map05012	Parkinson disease	KEGG PATHWAY	11/2644	122/11318	0.99999	1	Human Diseases	Neurodegenerative disease	gene6988|gene7316|gene20864|gene20863|gene16999|gene16475|gene2105|gene20855|gene4738|gene16119|gene18268	CASP3;GNAI1;LOC10603007864;LOC10603007863;SNCAIP;NDUFA7;ADCY5;LOC10603007855;HPSE238;SLC18A2;GPR37
9	map03040	Spliceosome	KEGG PATHWAY	9/2644	109/11318	0.999991	1	Genetic Information Processing	Transcription	gene17032|gene9861|gene17530|gene20224|gene8833|gene15867|gene19019|gene3775|gene11109	SNRPG;SNRPD1;CCDC12;PPIH;HSPA2;LOC10604815367;LOC10602987819;SRSF5;HSPA8
5	map03015	mRNA surveillance pathway	KEGG PATHWAY	5/2644	81/11318	0.999993	1	Genetic Information Processing	Translation	gene18801|gene17191|gene10250|gene1262|gene10590	LOC106048219;UPF3A;PPP2R3C;CSTF1;PPP2R3A
30	map05016	Huntington disease	KEGG PATHWAY	30/2644	255/11318	0.999999	1	Human Diseases	Neurodegenerative disease	gene3375|gene4881|gene2464|gene20855|gene16684|gene6988|gene16588|gene5015|gene5780|gene8744|gene5467|gene9530|gene8702|gene679|gene3414|gene8728|gene16085|gene17469|gene17378|gene20863|gene20864|gene17689|gene6775|gene4861|gene6488|gene4862|gene14258|gene16475|gene1416|gene4738	DNAH10;GRIA1;CREB5;LOC10603007855;LOC106045884;CASP3;ULK2;GPX7;BDNF;TRAF2;DNAH3;DNALI1;TUBB4B;PPARGC1A;ULK1;GRIN1;DNAI1;DNAH17;PIK3R4;LOC10603007863;LOC10603007864;RCOR1;TUBB6;DCTN4;ERN1;GPX3;NOP56;NDUFA7;CREB3L1;HPSE238
4	map03010	Ribosome	KEGG PATHWAY	4/2644	110/11318	1	1	Genetic Information Processing	Translation	gene14449|gene16460|gene2005|gene3660	MRPS6;RPL36;MRPL14;MRPS10
7	map03008	Ribosome biogenesis in eukaryotes	KEGG PATHWAY	7/2644	137/11318	1	1	Genetic Information Processing	Translation	gene7041|gene14258|gene8304|gene7174|gene7782|gene12315|gene6501	POP1;NOP56;XPO1;MDN1;PWP2;SBDS;UTP6
8	map04740	Olfactory transduction	KEGG PATHWAY	8/2644	156/11318	1	1	Organismal Systems	Sensory system	gene18849|gene16349|gene20461|gene18749|gene10183|gene16418|gene7452|gene13478	LOC106048249;PDE1C;ADRBK1;LOC106048164;LOC106038708;SLC8A1;CNGA3;LOC106042364

## Sheet: GO
Number	GO ID	Term Type	Description	Ratio_in_study	Ratio_in_pop	Rich factor	Pvalue	Padjust	Gene_ids	Gene_names
37	GO:0006935	BP	chemotaxis	37/ 2723	71/ 12028	0.521127	9.7866e-07	0.00115112	gene3187;gene777;gene11238;gene1800;gene19844;gene19845;gene15442;gene3922;gene20213;gene7321;gene10220;gene12998;gene14127;gene17316;gene19119;gene13942;gene12638;gene9867;gene15187;gene11403;gene10735;gene17390;gene9868;gene9869;gene16692;gene12997;gene12315;gene6216;gene14118;gene9522;gene6326;gene17302;gene120;gene19162;gene9870;gene20074;gene2370	PTN;CHGA;CXCR5;ANO6;LOC106049328;LOC106049327;ANXA1;LOC106031806;IL1B;HGF;PRKCQ;CCR4;BCAR1;EDN2;RHOG;RHOV2;LOC106041491;XCR1;SEMA7A;KIF20B03;CXCR4;ACKR4;LOC106038377;LOC106038356;LOC106045913;CX3CR1;SBDS;DOCK2;LPAR1;CEP5522;ACKR3;PTAFR;CH25H;LOC106048595;LOC106038357;CCR7;ITGB2
21	GO:0060326	BP	cell chemotaxis	21/ 2723	34/ 12028	0.617647	1.07934e-06	0.00115112	gene20213;gene19162;gene3187;gene7321;gene14118;gene11403;gene2370;gene777;gene14127;gene9522;gene17316;gene1800;gene120;gene19844;gene19845;gene15442;gene19119;gene12315;gene3922;gene12638;gene10220	IL1B;LOC106048595;PTN;HGF;LPAR1;KIF20B03;ITGB2;CHGA;BCAR1;CEP5522;EDN2;ANO6;CH25H;LOC106049328;LOC106049327;ANXA1;RHOG;SBDS;LOC106031806;LOC106041491;PRKCQ
78	GO:0006955	BP	immune response	78/ 2723	170/ 12028	0.458824	1.82318e-06	0.00115112	gene17686;gene11359;gene12788;gene13927;gene15810;gene5185;gene3489;gene11238;gene2407;gene17830;gene20665;gene19844;gene19845;gene2836;gene3889;gene12290;gene3480;gene20213;gene10682;gene3922;gene11169;gene1485;gene6887;gene18088;gene4855;gene20338;gene12998;gene132;gene12636;gene20778;gene12288;gene8682;gene19162;gene4347;gene18341;gene12638;gene19641;gene9182;gene10561;gene20396;gene20397;gene…	TRAF3;HSPD1;LOC106041570;LOC106042804;LOC10604815310;LOC106033294;VPREB3;CXCR5;IL6;LOC106047130;LOC106029527;LOC106049328;LOC106049327;LY96;IRF7;ATP9A0;LOC106031434;IL1B;KLHL6;LOC106031806;IL18;RAG1;TNFSF11;B2M;CD74;KCNIP2338;CCR4;CXCL12;LOC106041492;KCNIP2778;LOC106041089;TNFSF15;LOC106048595;LOC106032265;ENDOU;LOC106041491;LOC106049124;LOC106037642;LOC106039090;KCNIP2396;KCNIP2397;STK40;ATP9A1;…
37	GO:0042330	BP	taxis	37/ 2723	75/ 12028	0.493333	2.22735e-06	0.00115112	gene3187;gene777;gene11238;gene1800;gene19844;gene19845;gene15442;gene3922;gene20213;gene7321;gene10220;gene12998;gene14127;gene17316;gene19119;gene13942;gene12638;gene9867;gene15187;gene11403;gene10735;gene17390;gene9868;gene9869;gene16692;gene12997;gene12315;gene6216;gene14118;gene9522;gene6326;gene17302;gene120;gene19162;gene9870;gene20074;gene2370	PTN;CHGA;CXCR5;ANO6;LOC106049328;LOC106049327;ANXA1;LOC106031806;IL1B;HGF;PRKCQ;CCR4;BCAR1;EDN2;RHOG;RHOV2;LOC106041491;XCR1;SEMA7A;KIF20B03;CXCR4;ACKR4;LOC106038377;LOC106038356;LOC106045913;CX3CR1;SBDS;DOCK2;LPAR1;CEP5522;ACKR3;PTAFR;CH25H;LOC106048595;LOC106038357;CCR7;ITGB2
60	GO:0002684	BP	positive regulation of immune system process	60/ 2723	148/ 12028	0.405405	2.378e-06	0.00115112	gene16763;gene20665;gene3187;gene18995;gene15810;gene3255;gene2407;gene2596;gene8030;gene12268;gene15442;gene14202;gene3922;gene16609;gene6211;gene3889;gene11169;gene1485;gene17608;gene20338;gene8984;gene11359;gene17316;gene20364;gene10682;gene3860;gene9649;gene20396;gene20397;gene11570;gene15187;gene4789;gene12566;gene10298;gene19609;gene19621;gene13257;gene9869;gene7610;gene16004;gene15751;gene…	ITGB3;LOC106029527;PTN;CSF1;LOC10604815310;TRPV4;IL6;PPRC196;IL7R;ACVR2A;ANXA1;MSH2;LOC106031806;ADORA2B;LCP2;IRF7;IL18;RAG1;CD79B;KCNIP2338;CD40LG;HSPD1;EDN2;MOCS14;KLHL6;COCH;BLK;KCNIP2396;KCNIP2397;STK40;SEMA7A;ANXA79;RAB7B;EIF2B2;LOC106049106;MADCAM1;CXCL1257;LOC106038356;RAC2;SYK;BCL6;C7;MSTN;CBFB;NFKB260;GATA3;LOC106049812;BCAR1;FOS;PTPN22;HMGB2;PRKCQ;CD226;THEMIS2;PRKCB;LOC106038357;PLA2G7…
66	GO:0006952	BP	defense response	66/ 2723	161/ 12028	0.409938	2.4142e-06	0.00115112	gene11335;gene11543;gene18649;gene20548;gene777;gene7438;gene3700;gene2407;gene15442;gene15751;gene7410;gene19844;gene19845;gene2636;gene11723;gene2836;gene3889;gene9869;gene20213;gene16286;gene11169;gene12998;gene9021;gene13927;gene132;gene8984;gene16952;gene20778;gene9727;gene7870;gene3860;gene12638;gene19641;gene10561;gene17686;gene17830;gene11570;gene5990;gene20823;gene19609;gene13649;gene745…	STAT4;TNFRSF1B;PRCP;LOC106029404;CHGA;LOC106035746;TLR5;IL6;ANXA1;BCL6;HTR1A;LOC106049328;LOC106049327;RAB23;HNF4A3;LY96;IRF7;LOC106038356;IL1B;SAMHD1;IL18;CCR4;AGTR2;LOC106042804;CXCL12;CD40LG;ELF3;KCNIP2778;KCNJ8;AGTR1;COCH;LOC106041491;LOC106049124;LOC106039090;TRAF3;LOC106047130;STK40;PTGS2;LOC106029694;LOC106049106;TLR7;BDKRB1;MTHFD2L;CXCL1257;DUOX2;LYZ;LOC106038139;RAG2;LOC106049694;LOC1060…
132	GO:0002376	BP	immune system process	132/ 2723	319/ 12028	0.413793	2.43549e-06	0.00115112	gene20665;gene15810;gene2407;gene14367;gene2836;gene3922;gene12290;gene18088;gene4855;gene18014;gene9572;gene12636;gene20778;gene12638;gene20396;gene20397;gene20823;gene12791;gene13257;gene12315;gene17801;gene20308;gene12495;gene12946;gene14957;gene9870;gene2370;gene3187;gene777;gene19844;gene19845;gene6211;gene3889;gene11169;gene1485;gene6216;gene1912;gene19641;gene17686;gene11570;gene16801;gene…	LOC106029527;LOC10604815310;IL6;LOC10604643967;LY96;LOC106031806;ATP9A0;B2M;CD74;FANCC;DNASE1L3;LOC106041492;KCNIP2778;LOC106041491;KCNIP2396;KCNIP2397;LOC106029694;ANKRD2291;CXCL1257;SBDS;LOC106047112;LOC106049812;PTPN22;HMGB2;JCHAIN;LOC106038357;ITGB2;PTN;CHGA;LOC106049328;LOC106049327;LCP2;IRF7;IL18;RAG1;DOCK2;EXO1;LOC106049124;TRAF3;STK40;PRKCB;KCNIP2631;KCNIP2630;EIF2AK20;MTHFD2L;LOC10604643…
88	GO:0002682	BP	regulation of immune system process	88/ 2723	237/ 12028	0.371308	3.07362e-06	0.00115112	gene20665;gene18995;gene15810;gene2407;gene11359;gene3922;gene3800;gene8984;gene9572;gene7810;gene17316;gene18301;gene20396;gene5733;gene19722;gene13257;gene19720;gene20308;gene12495;gene12946;gene9870;gene9713;gene9649;gene12268;gene3187;gene11570;gene18524;gene16609;gene6211;gene16286;gene11169;gene16763;gene9522;gene3860;gene11205;gene17686;gene12773;gene12566;gene20631;gene20630;gene19621;gen…	LOC106029527;CSF1;LOC10604815310;IL6;HSPD1;LOC106031806;ARG2;CD40LG;DNASE1L3;UBASH3A;EDN2;PRNP;KCNIP2396;SERPING1;LOC106049209;CXCL1257;LOC106049205;LOC106049812;PTPN22;HMGB2;LOC106038357;PLA2G7;BLK;ACVR2A;PTN;STK40;GPATCH3;ADORA2B;LCP2;SAMHD1;IL18;ITGB3;CEP5522;COCH;LOC106039769;TRAF3;NOTCH2;RAB7B;KCNIP2631;KCNIP2630;MADCAM1;C7;CBFB;PPRC196;ANKRD2206;ITGB2;IRF7;IL7R;CD40;MSH2;RAC2;CD79B;KCNIP233…
114	GO:0005615	CC	extracellular space	114/ 2723	324/ 12028	0.351852	2.90663e-06	0.00115112	gene11984;gene18995;gene2407;gene18380;gene16702;gene12800;gene11981;gene15176;gene17316;gene20778;gene3476;gene13942;gene12638;gene5733;gene10171;gene17463;gene760;gene11699;gene11855;gene14255;gene9790;gene7519;gene3818;gene18333;gene16473;gene12946;gene18701;gene6346;gene10169;gene3187;gene777;gene8682;gene19844;gene19845;gene20084;gene11169;gene6451;gene14944;gene11205;gene7975;gene4424;gene1…	C5;CSF1;IL6;SOGA1;IGFBP2;MYOC;PHF19;LOC106044180;EDN2;KCNIP2778;SERPIND1;RHOV2;LOC106041491;SERPING1;LOC106038694;ENGASE;LOC106036374;FGF9;SLC2A105;CPXM1;FBLN1;IGF1;THBS1;CP;ANGPTL4;HMGB2;LOC106048083;FN1;LOC106038763;PTN;CHGA;TNFSF15;LOC106049328;LOC106049327;COL2A1;IL18;ARSG;LOC106043950;LOC106039769;FGF10;CPE;MTHFD2L;FABP5;AGT;EFHC2;GKN2;SOST;LYZ;LOC106044084;CPM;PPRC191;GDAP1L14;LOC106033756;…
33	GO:0140375	MF	immune receptor activity	33/ 2723	62/ 12028	0.532258	6.97138e-07	0.00115112	gene11238;gene7487;gene8032;gene14611;gene8030;gene11805;gene18252;gene8014;gene12997;gene12998;gene10215;gene16832;gene7378;gene9042;gene9867;gene10735;gene17390;gene9868;gene9869;gene16692;gene7427;gene12858;gene7606;gene12852;gene15129;gene14612;gene12856;gene12857;gene9522;gene6326;gene19161;gene9870;gene20074	CXCR5;LOC106035752;PRLR;IL23R;IL7R;IL17REL;IL1RAP;LIFR;CX3CR1;CCR4;IL2RA;LOC106046046;IL31RA;IL2RG;XCR1;CXCR4;ACKR4;LOC106038377;LOC106038356;LOC106045913;LOC106035572;IL1R2;LOC1060363746;IL18RAP;LOC106044089;IL12RB2;LOC106041678;LOC106041672;CEP5522;ACKR3;IL11RA;LOC106038357;CCR7
33	GO:0004896	MF	cytokine receptor activity	33/ 2723	61/ 12028	0.540984	1.49676e-06	0.00115112	gene11238;gene7487;gene8032;gene14611;gene8030;gene11805;gene18252;gene8014;gene12997;gene12998;gene10215;gene16832;gene7378;gene9042;gene9867;gene10735;gene17390;gene9868;gene9869;gene16692;gene7427;gene12858;gene7606;gene12852;gene15129;gene14612;gene12856;gene12857;gene9522;gene6326;gene19161;gene9870;gene20074	CXCR5;LOC106035752;PRLR;IL23R;IL7R;IL17REL;IL1RAP;LIFR;CX3CR1;CCR4;IL2RA;LOC106046046;IL31RA;IL2RG;XCR1;CXCR4;ACKR4;LOC106038377;LOC106038356;LOC106045913;LOC106035572;IL1R2;LOC1060363746;IL18RAP;LOC106044089;IL12RB2;LOC106041678;LOC106041672;CEP5522;ACKR3;IL11RA;LOC106038357;CCR7
13	GO:0032813	MF	tumor necrosis factor receptor superfamily binding	13/ 2723	17/ 12028	0.764706	3.73837e-06	0.00115112	gene8681;gene17686;gene8682;gene12788;gene6887;gene8744;gene15810;gene12791;gene9182;gene11989;gene8984;gene3669;gene14034	TNFSF8;TRAF3;TNFSF15;LOC106041570;TNFSF11;TRAF2;LOC10604815310;ANKRD2291;LOC106037642;DAB2IP;CD40LG;TRAF5;EDA
12	GO:0005164	MF	tumor necrosis factor receptor binding	12/ 2723	15/ 12028	0.8	4.02131e-06	0.00116626	gene8681;gene17686;gene8682;gene12788;gene6887;gene8744;gene15810;gene12791;gene9182;gene8984;gene3669;gene14034	TNFSF8;TRAF3;TNFSF15;LOC106041570;TNFSF11;TRAF2;LOC10604815310;ANKRD2291;LOC106037642;CD40LG;TRAF5;EDA
16	GO:0030595	BP	leukocyte chemotaxis	16/ 2723	24/ 12028	0.666667	5.05974e-06	0.00136782	gene20213;gene19162;gene3187;gene11403;gene777;gene9522;gene17316;gene1800;gene120;gene19844;gene19845;gene15442;gene12315;gene3922;gene12638;gene2370	IL1B;LOC106048595;PTN;KIF20B03;CHGA;CEP5522;EDN2;ANO6;CH25H;LOC106049328;LOC106049327;ANXA1;SBDS;LOC106031806;LOC106041491;ITGB2
218	GO:0060089	MF	molecular transducer activity	218/ 2723	730/ 12028	0.29863	7.3294e-06	0.00151458	gene17479;gene9021;gene11094;gene828;gene18781;gene15547;gene1827;gene15544;gene7410;gene4364;gene3921;gene2836;gene3922;gene17390;gene16171;gene14895;gene9475;gene8074;gene14165;gene7713;gene19987;gene6965;gene7491;gene10215;gene8078;gene18304;gene14089;gene18301;gene13258;gene19115;gene17801;gene19722;gene13257;gene4411;gene15383;gene14703;gene3409;gene10203;gene4724;gene12815;gene1172;gene5530…	GCGR;AGTR2;CALCR;GPR65;GRIN3B;LOC106044607;LOC106047885;LOC106044634;HTR1A;NPY2R;GPR18;LY96;LOC106031806;ACKR4;FZD8;NR4A2;LOC106037948;NPR2;CREB3L15;NR4A3;LPAR2;MTNR1A;P2RY8;IL2RA;CD72;SUCNR1;GRIN3A;PRNP;CXCL1258;CHRNA10;LOC106047112;LOC106049209;CXCL1257;NPY1R;UNC5D;LOC106043688;ADGRD1;PLXNA4;NR3C1;RXRG;HNF4A;GPER1;IL23R;MST1R;LPAR1;IL7R;ADGRF5;THBD;SSTR4;HTR5A;LOC106038357;RAMP3;ITGB2;GPR22;ACV…
218	GO:0038023	MF	signaling receptor activity	218/ 2723	730/ 12028	0.29863	7.3294e-06	0.00151458	gene17479;gene9021;gene11094;gene828;gene18781;gene15547;gene1827;gene15544;gene7410;gene4364;gene3921;gene2836;gene3922;gene17390;gene16171;gene14895;gene9475;gene8074;gene14165;gene7713;gene19987;gene6965;gene7491;gene10215;gene8078;gene18304;gene14089;gene18301;gene13258;gene19115;gene17801;gene19722;gene13257;gene4411;gene15383;gene14703;gene3409;gene10203;gene4724;gene12815;gene1172;gene5530…	GCGR;AGTR2;CALCR;GPR65;GRIN3B;LOC106044607;LOC106047885;LOC106044634;HTR1A;NPY2R;GPR18;LY96;LOC106031806;ACKR4;FZD8;NR4A2;LOC106037948;NPR2;CREB3L15;NR4A3;LPAR2;MTNR1A;P2RY8;IL2RA;CD72;SUCNR1;GRIN3A;PRNP;CXCL1258;CHRNA10;LOC106047112;LOC106049209;CXCL1257;NPY1R;UNC5D;LOC106043688;ADGRD1;PLXNA4;NR3C1;RXRG;HNF4A;GPER1;IL23R;MST1R;LPAR1;IL7R;ADGRF5;THBD;SSTR4;HTR5A;LOC106038357;RAMP3;ITGB2;GPR22;ACV…
19	GO:0070663	BP	regulation of leukocyte proliferation	19/ 2723	32/ 12028	0.59375	8.11307e-06	0.00156864	gene6988;gene7610;gene11169;gene88;gene20631;gene15810;gene3800;gene12495;gene2407;gene2314;gene10220;gene8984;gene15751;gene18301;gene15442;gene20630;gene3922;gene2313;gene2415	CASP3;RAC2;IL18;HHEX;KCNIP2631;LOC10604815310;ARG2;PTPN22;IL6;CTLA4;PRKCQ;CD40LG;BCL6;PRNP;ANXA1;KCNIP2630;LOC106031806;CD28;GPNMB
972	GO:0016021	CC	integral component of membrane	972/ 2723	3711/ 12028	0.261924	9.16437e-06	0.00167865	gene10747;gene14367;gene17364;gene826;gene7043;gene828;gene15810;gene18999;gene15547;gene3160;gene10748;gene15544;gene16668;gene11909;gene16663;gene11906;gene11905;gene3608;gene3609;gene3764;gene9475;gene4364;gene6605;gene7368;gene18995;gene19987;gene4855;gene20548;gene9571;gene7958;gene10119;gene19011;gene14165;gene410;gene10117;gene12158;gene18636;gene17501;gene400;gene5579;gene9491;gene9414;ge…	ACMSD;LOC10604643967;FAM198A;KCNK10;NIPAL2;GPR65;LOC10604815310;SLC6A17;LOC106044607;LOC106030963;TMEM163;LOC106044634;TMEM9;ST14;ADORA1;APLP2;LOC106040581;SLC3A1;LOC106031475;LCLAT1;LOC106037948;NPY2R;SMIM5;LOC106035576;CSF1;LPAR2;CD74;LOC106029404;ABHD6;KCNE4;UGT8;LOC10602987811;CREB3L15;LOC106032461;NDST4;LYVE1;CNTNAP1;SLC16A3;NRG3;SEMA6D;GJB3;IFNLR1;SCD;LOC106049209;KCNIP2398;KCNIP2399;SLC16A…
984	GO:0031224	CC	intrinsic component of membrane	984/ 2723	3736/ 12028	0.263383	9.51544e-06	0.00172032	gene10747;gene14367;gene17364;gene826;gene7043;gene828;gene15810;gene18999;gene15547;gene3160;gene10748;gene15544;gene16668;gene11909;gene16663;gene11906;gene11905;gene3608;gene3609;gene3764;gene9475;gene4364;gene6605;gene7368;gene18995;gene19987;gene4855;gene20548;gene9571;gene7958;gene12649;gene10119;gene19011;gene14165;gene410;gene10117;gene12158;gene18636;gene17501;gene400;gene5579;gene9491;g…	ACMSD;LOC10604643967;FAM198A;KCNK10;NIPAL2;GPR65;LOC10604815310;SLC6A17;LOC106044607;LOC106030963;TMEM163;LOC106044634;TMEM9;ST14;ADORA1;APLP2;LOC106040581;SLC3A1;LOC106031475;LCLAT1;LOC106037948;NPY2R;SMIM5;LOC106035576;CSF1;LPAR2;CD74;LOC106029404;ABHD6;KCNE4;PEX12;UGT8;LOC10602987811;CREB3L15;LOC106032461;NDST4;LYVE1;CNTNAP1;SLC16A3;NRG3;SEMA6D;GJB3;IFNLR1;SCD;LOC106049209;KCNIP2398;KCNIP2399;…
263	GO:0048583	BP	regulation of response to stimulus	263/ 2723	908/ 12028	0.289648	9.79095e-06	0.00174287	gene15613;gene11359;gene16220;gene15810;gene3279;gene645;gene2407;gene10693;gene20665;gene4367;gene6275;gene14089;gene2836;gene3889;gene9366;gene15768;gene13258;gene7316;gene3800;gene9552;gene9571;gene9572;gene9004;gene7810;gene17316;gene18301;gene13942;gene12638;gene7793;gene13047;gene20396;gene5733;gene17468;gene10080;gene14419;gene4973;gene10690;gene5943;gene19722;gene13257;gene19720;gene2105;…	RHOB;HSPD1;DKK2;LOC10604815310;FICD;FGFBP1;IL6;LOC106039183;LOC106029527;GUCY1A3;ARHGEF37;GRIN3A;LY96;IRF7;CNKSR2;CDH13;CXCL1258;GNAI1;ARG2;CEP5552;ABHD6;DNASE1L3;GPC4;UBASH3A;EDN2;PRNP;RHOV2;LOC106041491;SIK1;HSD17B11;KCNIP2396;SERPING1;CYTH1;XIAP;HOMER2;PRKAA2;GPC1;CYR61;LOC106049209;CXCL1257;LOC106049205;ADCY5;MECOM;DAB2IP;FGF9;SPATA13;NETO2;SLC2A105;RAP1GAP2;GGT7;FBLN1;IGF1;ACOX2;LOC106049812…
1898	GO:0110165	CC	cellular anatomical entity	1898/ 2723	7764/ 12028	0.244462	9.8906e-06	0.00174287	gene14367;gene14361;gene15810;gene15547;gene5700;gene3603;gene3608;gene3609;gene16702;gene7368;gene16708;gene16709;gene8107;gene1061;gene15383;gene14703;gene564;gene15388;gene5639;gene15544;gene4724;gene14493;gene20307;gene8538;gene3713;gene7779;gene8014;gene14141;gene5527;gene5526;gene11282;gene5520;gene18878;gene4035;gene4032;gene14384;gene11510;gene20639;gene20631;gene20630;gene20633;gene4152;…	LOC10604643967;TRIM71;LOC10604815310;LOC106044607;TLN2;TBX3;SLC3A1;LOC106031475;IGFBP2;LOC106035576;PECR;TMEM169;NTRK3;LOC106039869;UNC5D;LOC106043688;DNMBP4;RNF122;DNMBP39;LOC106044634;NR3C1;BACH1;LOC106049814;LUM;IARS2;CHGA9;LIFR;B3GNT9;LOC106033532;LOC106033533;AQP11;PRKAR1B;ACTN28;NRAP;TCF7L2;BCL2A1;RNF186;KCNIP2639;KCNIP2631;KCNIP2630;KCNIP2633;LAMP3;B3GNT5;SOST;LOC1060363743;BAZ1A;LOC106048…
18	GO:0050670	BP	regulation of lymphocyte proliferation	18/ 2723	30/ 12028	0.6	1.14923e-05	0.00197512	gene6988;gene7610;gene11169;gene20631;gene15810;gene3800;gene12495;gene2407;gene2314;gene10220;gene8984;gene15751;gene18301;gene15442;gene20630;gene3922;gene2313;gene2415	CASP3;RAC2;IL18;KCNIP2631;LOC10604815310;ARG2;PTPN22;IL6;CTLA4;PRKCQ;CD40LG;BCL6;PRNP;ANXA1;KCNIP2630;LOC106031806;CD28;GPNMB
18	GO:0032944	BP	regulation of mononuclear cell proliferation	18/ 2723	30/ 12028	0.6	1.14923e-05	0.00197512	gene6988;gene7610;gene11169;gene20631;gene15810;gene3800;gene12495;gene2407;gene2314;gene10220;gene8984;gene15751;gene18301;gene15442;gene20630;gene3922;gene2313;gene2415	CASP3;RAC2;IL18;KCNIP2631;LOC10604815310;ARG2;PTPN22;IL6;CTLA4;PRKCQ;CD40LG;BCL6;PRNP;ANXA1;KCNIP2630;LOC106031806;CD28;GPNMB
25	GO:0005539	MF	glycosaminoglycan binding	25/ 2723	48/ 12028	0.520833	1.23613e-05	0.00209855	gene3187;gene9996;gene11906;gene6420;gene1496;gene13809;gene17581;gene8097;gene12158;gene18301;gene564;gene7975;gene5943;gene13001;gene19706;gene1716;gene2415;gene19080;gene19081;gene3818;gene8539;gene15122;gene14957;gene18555;gene19504	PTN;NOV;APLP2;MSTN;CD44;VCAN;TNFAIP6;HAPLN3;LYVE1;PRNP;DNMBP4;FGF10;CYR61;SUSD5;ECM2;LYZ;GPNMB;LOC10602987880;LOC10602987881;THBS1;DCN;LOC106044084;JCHAIN;COMP;LOC106048966
354	GO:0007165	BP	signal transduction	354/ 2723	1279/ 12028	0.276779	1.34794e-05	0.0022608	gene19498;gene8973;gene10067;gene10060;gene9086;gene9475;gene8472;gene6174;gene3805;gene17316;gene4973;gene14703;gene899;gene1074;gene20461;gene556;gene12661;gene18522;gene2296;gene6456;gene6455;gene14223;gene5520;gene15312;gene11164;gene4032;gene18515;gene4424;gene12566;gene13562;gene2120;gene3021;gene4254;gene2519;gene8127;gene14137;gene11764;gene12140;gene4693;gene12283;gene15856;gene3332;gene…	LOC106048962;FGF13;LOC106038552;IRS4;TAC1;LOC106037948;CRHR2;ARAP3;PLEK2;EDN2;PRKAA2;LOC106043688;BOC;BCL9;KCNIP2461;GRK4;HSPB1;SFN;ITGA4;RGS9;GNA13;LOC106043205;PRKAR1B;SFRP4;DIXDC1;TCF7L2;RPS6KA1;CPE;RAB7B;PLA2G4F2;ADAM80;ARHGAP1921;FAM83G;RARB;RGMA;GNAO1;GDAP1L14;TEAD1;EGR1;FZD9;MYO9B;RHOF;RAB23;ARHGAP19;ENTPD731;SEMA3E;DCLK2;HGF;SLC16A9;SOCS1;GABBR2;LOC106039090;LOC106049106;PPARD;ENTPD717;HI…
99	GO:0031226	CC	intrinsic component of plasma membrane	99/ 2723	294/ 12028	0.336735	1.46706e-05	0.00233953	gene826;gene18999;gene10690;gene1827;gene10693;gene7410;gene2836;gene15274;gene1185;gene9571;gene8078;gene9004;gene18302;gene13942;gene13258;gene5965;gene17501;gene13257;gene1772;gene2105;gene5639;gene899;gene8300;gene9408;gene19258;gene12268;gene10163;gene12301;gene2324;gene16763;gene11784;gene10346;gene12718;gene17118;gene12773;gene18452;gene3342;gene15729;gene15435;gene117;gene10970;gene3131;g…	KCNK10;SLC6A17;GPC1;LOC106047885;LOC106039183;HTR1A;LY96;SLC2A5;SLC2A10;ABHD6;CD72;GPC4;PROM2;RHOV2;CXCL1258;LRRC8D;SLC16A3;CXCL1257;SLC16A7;ADCY5;DNMBP39;BOC;LOC106036638;NCMAP;SLC4A8;ACVR2A;SGMS2;RNF43;GPR1;ITGB3;LOC106040422;HTR5A;ANKRD2218;GPC5;NOTCH2;NFKB252;LOC106031149;ANXA8L129;TMEM2;SLC16A12;ADCY7;ADIPOR2;ADRA2A;FAM26E;NPFFR1;CHRNA9;LOC106045044;MTNR1A;LOC1060298781;TRPC3;LOC106031280;KC…
15	GO:0008009	MF	chemokine activity	15/ 2723	23/ 12028	0.652174	1.50946e-05	0.00236103	gene12292;gene12290;gene12291;gene4789;gene19163;gene12288;gene19162;gene13081;gene923;gene132;gene12636;gene5185;gene19844;gene19845;gene12638	ATP9A2;ATP9A0;ATP9A1;ANXA79;LOC106048600;LOC106041089;LOC106048595;MTHFD2L;LOC106038263;CXCL12;LOC106041492;LOC106033294;LOC106049328;LOC106049327;LOC106041491
155	GO:0005102	MF	signaling receptor binding	155/ 2723	502/ 12028	0.308765	1.55644e-05	0.00240747	gene16306;gene11588;gene8973;gene18995;gene15810;gene19492;gene11989;gene10060;gene7410;gene2836;gene5780;gene16708;gene7316;gene17316;gene4796;gene13942;gene12638;gene11109;gene18985;gene5730;gene1270;gene12791;gene15801;gene2407;gene11699;gene11205;gene11855;gene3951;gene7519;gene7215;gene16477;gene5330;gene3122;gene14957;gene12725;gene9649;gene12268;gene12788;gene12301;gene8682;gene15402;gene5…	LOC106045455;DNAJA1;FGF13;CSF1;LOC10604815310;SEMA4A;DAB2IP;IRS4;HTR1A;LY96;BDNF;PECR;GNAI1;EDN2;TGFBI;RHOV2;LOC106041491;HSPA8;NRTN;CPN130;ANKRD220;ANKRD2291;LOC10604815301;IL6;FGF9;LOC106039769;SLC2A105;LOC106031921;IGF1;ACOX2;LOC106045698;LOC1060333280;CECR1;JCHAIN;ANKRD2225;BLK;ACVR2A;LOC106041570;RNF43;TNFSF15;IRS2;FGF7;LOC106049328;LOC106049327;COL2A1;LCP2;GNA13;IL18;ANKS1A;DOCK2;LOC1060409…
191	GO:0004888	MF	transmembrane signaling receptor activity	191/ 2723	641/ 12028	0.297972	1.8642e-05	0.00282082	gene17479;gene9021;gene11094;gene828;gene18781;gene15547;gene1827;gene15544;gene7410;gene4364;gene3921;gene3922;gene17390;gene16171;gene9475;gene14165;gene19987;gene11311;gene7491;gene10215;gene8078;gene18304;gene14089;gene20276;gene13258;gene13257;gene4411;gene15383;gene12997;gene14703;gene3409;gene10203;gene15308;gene5530;gene19317;gene18749;gene8030;gene9718;gene13386;gene13385;gene10346;gene9…	GCGR;AGTR2;CALCR;GPR65;GRIN3B;LOC106044607;LOC106047885;LOC106044634;HTR1A;NPY2R;GPR18;LOC106031806;ACKR4;FZD8;LOC106037948;CREB3L15;LPAR2;MC4R;P2RY8;IL2RA;CD72;SUCNR1;GRIN3A;KCNIP2276;CXCL1258;CXCL1257;NPY1R;UNC5D;CX3CR1;LOC106043688;ADGRD1;PLXNA4;GPR141;GPER1;MST1R;LOC106048164;IL7R;ADGRF5;THBD;SSTR4;HTR5A;LOC106038357;ITGB2;GPR22;ACVR2A;ADORA1;LIFR;LOC106040280;ADGRB3;LOC106037716;ADORA2B;LOC1…
34	GO:0005126	MF	cytokine receptor binding	34/ 2723	75/ 12028	0.453333	1.91334e-05	0.00286404	gene17686;gene12268;gene12788;gene15810;gene3669;gene2407;gene8682;gene19844;gene19845;gene20213;gene20591;gene6887;gene8744;gene8984;gene132;gene12636;gene12288;gene12638;gene12292;gene12290;gene12291;gene8681;gene4789;gene12791;gene13081;gene2646;gene923;gene14034;gene16004;gene9182;gene5185;gene19163;gene19162;gene11989	TRAF3;ACVR2A;LOC106041570;LOC10604815310;TRAF5;IL6;TNFSF15;LOC106049328;LOC106049327;IL1B;LOC106029448;TNFSF11;TRAF2;CD40LG;CXCL12;LOC106041492;LOC106041089;LOC106041491;ATP9A2;ATP9A0;ATP9A1;TNFSF8;ANXA79;ANKRD2291;MTHFD2L;BMP5;LOC106038263;EDA;SYK;LOC106037642;LOC106033294;LOC106048600;LOC106048595;DAB2IP
31	GO:0006954	BP	inflammatory response	31/ 2723	66/ 12028	0.469697	1.9618e-05	0.00290534	gene11543;gene18649;gene2407;gene15751;gene19844;gene19845;gene15442;gene11723;gene4347;gene20213;gene11169;gene17830;gene9021;gene8984;gene16952;gene20778;gene7870;gene12638;gene20823;gene19162;gene745;gene9869;gene20193;gene3818;gene12946;gene20364;gene5990;gene12998;gene9870;gene20074;gene8347	TNFRSF1B;PRCP;IL6;BCL6;LOC106049328;LOC106049327;ANXA1;HNF4A3;LOC106032265;IL1B;IL18;LOC106047130;AGTR2;CD40LG;ELF3;KCNIP2778;AGTR1;LOC106041491;LOC106029694;LOC106048595;BDKRB1;LOC106038356;LOC106049694;THBS1;HMGB2;MOCS14;PTGS2;CCR4;LOC106038357;CCR7;IRAK2
44	GO:0031012	CC	extracellular matrix	44/ 2723	107/ 12028	0.411215	2.05822e-05	0.00301605	gene19671;gene6009;gene11436;gene14183;gene10690;gene10693;gene15757;gene20084;gene17850;gene13515;gene13809;gene9004;gene9513;gene4830;gene18301;gene3860;gene13027;gene3981;gene7975;gene6012;gene5943;gene8680;gene11408;gene9996;gene17118;gene19704;gene937;gene4253;gene11912;gene10798;gene15518;gene19706;gene11855;gene9790;gene1558;gene16636;gene15122;gene8538;gene5330;gene6010;gene6007;gene6006;…	WNT4;EVC9;WNT7A;MMP2;GPC1;LOC106039183;ANXA8L157;COL2A1;MMP9;WNT11;VCAN;GPC4;CEP5513;ADAMTS2;PRNP;COCH;HPSE;COL17A1;FGF10;EVC22;CYR61;TNC;TIMP4;NOV;GPC5;OMD;COL8A1;SLC5A10;ADAMTS8;WNT6;SMOC2;ECM2;SLC2A105;FBLN1;MGP;PRELP;LOC106044084;LUM;LOC1060333280;EVC20;LOC106034136;EVC6;FN1;ADAMTS1
183	GO:0051239	BP	regulation of multicellular organismal process	183/ 2723	612/ 12028	0.29902	2.38255e-05	0.00335025	gene11359;gene8973;gene18995;gene11350;gene10690;gene4411;gene2407;gene4367;gene2836;gene3922;gene9475;gene4601;gene3800;gene9571;gene17316;gene19011;gene18301;gene13942;gene9164;gene5733;gene16576;gene14419;gene13257;gene645;gene7661;gene2596;gene11699;gene12312;gene14856;gene12816;gene3818;gene5338;gene17807;gene14118;gene12495;gene12946;gene9408;gene10304;gene12268;gene3187;gene12661;gene18522…	HSPD1;FGF13;CSF1;HECW2;GPC1;NPY1R;IL6;GUCY1A3;LY96;LOC106031806;LOC106037948;LAMA4;ARG2;ABHD6;EDN2;LOC10602987811;PRNP;RHOV2;DSG2;SERPING1;MARCH876;HOMER2;CXCL1257;FGFBP1;ATF4;PPRC196;FGF9;LIMK1;RAG16;LOC106041556;THBS1;LOC1060333288;DUSP15;LPAR1;PTPN22;HMGB2;NCMAP;FOS;ACVR2A;PTN;HSPB1;SFN;S100A1;GPATCH3;GATA3;PHLDB2;CBLN1;LOC106040700;ADORA2B;IRF7;IL18;RAG1;TRIB2;DSCAM;BRINP1;KANK1;AGTR1;LOC1060…
146	GO:0007166	BP	cell surface receptor signaling pathway	146/ 2723	473/ 12028	0.308668	2.46863e-05	0.00343657	gene17479;gene11094;gene17471;gene606;gene2407;gene10060;gene3889;gene16381;gene9475;gene8074;gene8472;gene899;gene16880;gene17316;gene13942;gene12638;gene15801;gene2105;gene11912;gene62;gene11699;gene3409;gene11855;gene1074;gene17807;gene19317;gene12495;gene9718;gene5563;gene9649;gene12268;gene3187;gene12661;gene4941;gene2296;gene15402;gene2613;gene9552;gene6211;gene3937;gene16763;gene14223;gene…	GCGR;CALCR;SOCS3;MSX1;IL6;IRS4;IRF7;DTX1;LOC106037948;NPR2;CRHR2;BOC;LOC106046116;EDN2;RHOV2;LOC106041491;LOC10604815301;ADCY5;ADAMTS8;LOC106037870;FGF9;ADGRD1;SLC2A105;BCL9;DUSP15;MST1R;PTPN22;ADGRF5;FGF7;BLK;ACVR2A;PTN;HSPB1;ROR1;ITGA4;IRS2;ADGRB3;CEP5552;LCP2;ITGBL1;ITGB3;LOC106043205;SFRP4;DIXDC1;TCF7L2;KLHL6;LOC106039769;FGF10;LOC106033662;TRAF3;CPE;NOTCH2;SMAD7;PLA2G4F2;ADAM80;MADCAM1;CBLB;…
12	GO:0001637	MF	G protein-coupled chemoattractant receptor activity	12/ 2723	17/ 12028	0.705882	3.43806e-05	0.0044316	gene9867;gene12997;gene12998;gene10735;gene17390;gene11238;gene9868;gene9869;gene16692;gene6326;gene9870;gene20074	XCR1;CX3CR1;CCR4;CXCR4;ACKR4;CXCR5;LOC106038377;LOC106038356;LOC106045913;ACKR3;LOC106038357;CCR7
12	GO:0004950	MF	chemokine receptor activity	12/ 2723	17/ 12028	0.705882	3.43806e-05	0.0044316	gene9867;gene12997;gene12998;gene10735;gene17390;gene11238;gene9868;gene9869;gene16692;gene6326;gene9870;gene20074	XCR1;CX3CR1;CCR4;CXCR4;ACKR4;CXCR5;LOC106038377;LOC106038356;LOC106045913;ACKR3;LOC106038357;CCR7
96	GO:0042127	BP	regulation of cell population proliferation	96/ 2723	291/ 12028	0.329897	4.77128e-05	0.00598388	gene15810;gene10690;gene645;gene2407;gene3922;gene5173;gene14167;gene3800;gene17316;gene18301;gene13258;gene17105;gene11699;gene9790;gene17807;gene12495;gene12946;gene20014;gene3187;gene8680;gene18522;gene13559;gene11169;gene16763;gene4032;gene8541;gene12773;gene20631;gene20630;gene15729;gene2519;gene2591;gene88;gene8959;gene7964;gene606;gene8030;gene19671;gene5032;gene12205;gene7610;gene7321;gen…	LOC10604815310;GPC1;FGFBP1;IL6;LOC106031806;E2F4;CREB3L17;ARG2;EDN2;PRNP;CXCL1258;BEST35;FGF9;FBLN1;DUSP15;PTPN22;HMGB2;FGFR4;PTN;TNC;SFN;SPRY1;IL18;ITGB3;TCF7L2;BTG1;NOTCH2;KCNIP2631;KCNIP2630;ANXA8L129;RARB;PPRC191;HHEX;TNMD;SGPP2;MSX1;IL7R;WNT4;CDKN2C;SDC4;RAC2;HGF;MYC;ST8SIA1;WNT3A;CYR61;KLHL41;TNFAIP3;CD9;LOC106040927;MSTN;PPARD;BTG2;SLC38A23;CDCA7;PRKCQ;PTPRM;IL11RA;PRKD1;TIPIN;ARHGAP1999;P…
9	GO:0101031	CC	chaperone complex	9/ 2723	11/ 12028	0.818182	5.40192e-05	0.0067143	gene1713;gene8648;gene3578;gene10955;gene12630;gene8301;gene2637;gene11109;gene8228	CCT2;KIF1148;HSPB8;TCP1;CCT6A;CCT4;BAG2;HSPA8;PTPN218
27	GO:0051249	BP	regulation of lymphocyte activation	27/ 2723	58/ 12028	0.465517	5.48312e-05	0.00675492	gene11359;gene15810;gene2407;gene2596;gene8030;gene15751;gene15442;gene14202;gene20630;gene3922;gene6988;gene7610;gene11169;gene1485;gene3800;gene8984;gene10230;gene18301;gene20631;gene4565;gene2415;gene14139;gene12495;gene10220;gene2313;gene2315;gene2314	HSPD1;LOC10604815310;IL6;PPRC196;IL7R;BCL6;ANXA1;MSH2;KCNIP2630;LOC106031806;CASP3;RAC2;IL18;RAG1;ARG2;CD40LG;GATA3;PRNP;KCNIP2631;TNFAIP3;GPNMB;CBFB;PTPN22;PRKCQ;CD28;LOC106030066;CTLA4
17	GO:0050707	BP	regulation of cytokine secretion	17/ 2723	30/ 12028	0.566667	5.63642e-05	0.00687312	gene12858;gene13258;gene11169;gene20823;gene4565;gene3255;gene15729;gene3700;gene13257;gene12495;gene15442;gene11205;gene11870;gene4347;gene3800;gene13411;gene10561	IL1R2;CXCL1258;IL18;LOC106029694;TNFAIP3;TRPV4;ANXA8L129;TLR5;CXCL1257;PTPN22;ANXA1;LOC106039769;EYA20;LOC106032265;ARG2;PTGR21;LOC106039090
52	GO:0050776	BP	regulation of immune response	52/ 2723	138/ 12028	0.376812	5.67781e-05	0.00687312	gene20665;gene20397;gene15810;gene2596;gene15442;gene8030;gene11359;gene17853;gene14202;gene3889;gene19609;gene16609;gene6211;gene16286;gene17608;gene3800;gene20338;gene14127;gene7810;gene20364;gene10298;gene18301;gene3860;gene11205;gene20396;gene5733;gene11570;gene15187;gene20631;gene20630;gene19722;gene13257;gene19720;gene10682;gene7610;gene12442;gene16004;gene15751;gene8002;gene18460;gene20308…	LOC106029527;KCNIP2397;LOC10604815310;PPRC196;ANXA1;IL7R;HSPD1;CD40;MSH2;IRF7;LOC106049106;ADORA2B;LCP2;SAMHD1;CD79B;ARG2;KCNIP2338;BCAR1;UBASH3A;MOCS14;EIF2B2;PRNP;COCH;LOC106039769;KCNIP2396;SERPING1;STK40;SEMA7A;KCNIP2631;KCNIP2630;LOC106049209;CXCL1257;LOC106049205;KLHL6;RAC2;SOCS1;SYK;BCL6;C7;NFKB260;LOC106049812;PTPN22;TNFAIP3;HMGB2;PRKCQ;ANKRD2206;CD226;THEMIS2;PRKCB;BLK;CYFIP2;ITGB2
29	GO:0046649	BP	lymphocyte activation	29/ 2723	64/ 12028	0.453125	6.20772e-05	0.00726199	gene4693;gene11359;gene19671;gene11238;gene17853;gene8030;gene15751;gene15442;gene14202;gene3922;gene16645;gene11169;gene1485;gene6216;gene7614;gene1912;gene8984;gene14139;gene20631;gene20630;gene2532;gene13257;gene1484;gene14367;gene18685;gene12495;gene12706;gene16801;gene1439	EGR1;HSPD1;WNT4;CXCR5;CD40;IL7R;BCL6;ANXA1;MSH2;LOC106031806;CCND3;IL18;RAG1;DOCK2;MFNG;EXO1;CD40LG;CBFB;KCNIP2631;KCNIP2630;PPRC132;CXCL1257;RAG2;LOC10604643967;AICDA;PTPN22;ANKRD2206;PRKCB;LOC1060464399
15	GO:0042379	MF	chemokine receptor binding	15/ 2723	25/ 12028	0.6	6.29034e-05	0.00729732	gene12292;gene12290;gene12291;gene4789;gene19163;gene12288;gene19162;gene13081;gene923;gene132;gene12636;gene5185;gene19844;gene19845;gene12638	ATP9A2;ATP9A0;ATP9A1;ANXA79;LOC106048600;LOC106041089;LOC106048595;MTHFD2L;LOC106038263;CXCL12;LOC106041492;LOC106033294;LOC106049328;LOC106049327;LOC106041491
32	GO:0001819	BP	positive regulation of cytokine production	32/ 2723	74/ 12028	0.432432	7.27055e-05	0.00815319	gene4693;gene11359;gene12661;gene3255;gene3700;gene2407;gene2596;gene15442;gene2836;gene3889;gene13411;gene13515;gene16609;gene11169;gene7321;gene8984;gene19767;gene13258;gene15187;gene12566;gene15729;gene13257;gene12509;gene7661;gene11870;gene4021;gene8538;gene12495;gene10220;gene13348;gene11888;gene14856	EGR1;HSPD1;HSPB1;TRPV4;TLR5;IL6;PPRC196;ANXA1;LY96;IRF7;PTGR21;WNT11;ADORA2B;IL18;HGF;CD40LG;IRF8;CXCL1258;SEMA7A;RAB7B;ANXA8L129;CXCL1257;WNT2B;ATF4;EYA20;ADRA2A;LUM;PTPN22;PRKCQ;CD226;TIRAP;RAG16
1986	GO:0005575	CC	cellular_component	1986/ 2723	8405/ 12028	0.236288	8.04403e-05	0.00874851	gene14367;gene14361;gene15810;gene15547;gene5700;gene3603;gene3608;gene3609;gene16702;gene7368;gene16708;gene16709;gene4973;gene8107;gene15383;gene14703;gene564;gene15388;gene5639;gene15544;gene4724;gene14493;gene20307;gene8538;gene3713;gene7779;gene8014;gene14141;gene5527;gene5526;gene11282;gene5520;gene18878;gene4035;gene4032;gene14384;gene11510;gene20639;gene20631;gene20630;gene20633;gene4152;…	LOC10604643967;TRIM71;LOC10604815310;LOC106044607;TLN2;TBX3;SLC3A1;LOC106031475;IGFBP2;LOC106035576;PECR;TMEM169;PRKAA2;NTRK3;UNC5D;LOC106043688;DNMBP4;RNF122;DNMBP39;LOC106044634;NR3C1;BACH1;LOC106049814;LUM;IARS2;CHGA9;LIFR;B3GNT9;LOC106033532;LOC106033533;AQP11;PRKAR1B;ACTN28;NRAP;TCF7L2;BCL2A1;RNF186;KCNIP2639;KCNIP2631;KCNIP2630;KCNIP2633;LAMP3;B3GNT5;SOST;LOC1060363743;BAZ1A;LOC106048804;LO…
21	GO:0007162	BP	negative regulation of cell adhesion	21/ 2723	41/ 12028	0.512195	8.50097e-05	0.00917379	gene6988;gene7326;gene15988;gene9790;gene3255;gene16336;gene14022;gene2415;gene12495;gene7829;gene15751;gene13658;gene2925;gene18301;gene15442;gene11205;gene17324;gene1007;gene3800;gene14139;gene15768	CASP3;SEMA3E;LOC106045044;FBLN1;TRPV4;CD9;KANK1;GPNMB;PTPN22;DSCAM;BCL6;ARHGAP6;ITGB1BP1;PRNP;ANXA1;LOC106039769;LOC106046593;PHLDB2;ARG2;CBFB;CDH13
913	GO:0065007	BP	biological regulation	913/ 2723	3665/ 12028	0.249113	9.3623e-05	0.00994905	gene19498;gene8973;gene14361;gene826;gene10067;gene15810;gene10060;gene11588;gene7568;gene9085;gene9086;gene5370;gene11901;gene5173;gene9475;gene18995;gene8472;gene6174;gene18014;gene20;gene19150;gene9571;gene9572;gene3805;gene7810;gene17316;gene19016;gene19011;gene17645;gene15867;gene18636;gene20397;gene17468;gene17737;gene4973;gene16999;gene19722;gene18638;gene7829;gene4080;gene14703;gene2826;g…	LOC106048962;FGF13;TRIM71;KCNK10;LOC106038552;LOC10604815310;IRS4;DNAJA1;GSC8;ASNS;TAC1;CDIP1;BARX2;E2F4;LOC106037948;CSF1;CRHR2;ARAP3;FANCC;KCNIP2;TTK;ABHD6;DNASE1L3;PLEK2;UBASH3A;EDN2;LOC10602987816;LOC10602987811;ACTR3B;LOC10604815367;CNTNAP1;KCNIP2397;CYTH1;RAD51;PRKAA2;SNCAIP;LOC106049209;VPS25;DSCAM;MECOM;LOC106043688;ZFHX4;BOC;PKIA;NR3C1;FBLN1;IGF1;HNF4A;FITM2;CP;TGIF1;LUM;INSR;PARPBP;RUNX…
92	GO:0005887	CC	integral component of plasma membrane	92/ 2723	282/ 12028	0.326241	9.46694e-05	0.00998403	gene826;gene18999;gene1827;gene7410;gene15274;gene1185;gene9571;gene8078;gene18302;gene13942;gene13258;gene5965;gene17501;gene13257;gene1772;gene2105;gene5639;gene899;gene8300;gene9408;gene19258;gene12268;gene10163;gene12301;gene2324;gene16763;gene11784;gene10346;gene12718;gene12773;gene18452;gene3342;gene15729;gene15435;gene117;gene10970;gene4021;gene4584;gene268;gene10578;gene15988;gene6965;gen…	KCNK10;SLC6A17;LOC106047885;HTR1A;SLC2A5;SLC2A10;ABHD6;CD72;PROM2;RHOV2;CXCL1258;LRRC8D;SLC16A3;CXCL1257;SLC16A7;ADCY5;DNMBP39;BOC;LOC106036638;NCMAP;SLC4A8;ACVR2A;SGMS2;RNF43;GPR1;ITGB3;LOC106040422;HTR5A;ANKRD2218;NOTCH2;NFKB252;LOC106031149;ANXA8L129;TMEM2;SLC16A12;ADCY7;ADRA2A;FAM26E;NPFFR1;CHRNA9;LOC106045044;MTNR1A;LOC1060298781;TRPC3;KCNK1;SSTR2;CHRNA2;MFSD2A;KCNIP2236;SCARA5;LOC106034007;…
855	GO:0050789	BP	regulation of biological process	855/ 2723	3418/ 12028	0.250146	0.000110676	0.0115844	gene19498;gene8973;gene14361;gene18995;gene10067;gene15810;gene10060;gene11588;gene7568;gene9085;gene9086;gene5370;gene11901;gene5173;gene9475;gene8472;gene6174;gene3800;gene19150;gene9571;gene9572;gene3805;gene7810;gene17316;gene19016;gene19011;gene17645;gene20396;gene20397;gene17468;gene17737;gene4973;gene16999;gene19722;gene18638;gene7829;gene4080;gene14703;gene2826;gene899;gene2822;gene4724;g…	LOC106048962;FGF13;TRIM71;CSF1;LOC106038552;LOC10604815310;IRS4;DNAJA1;GSC8;ASNS;TAC1;CDIP1;BARX2;E2F4;LOC106037948;CRHR2;ARAP3;ARG2;TTK;ABHD6;DNASE1L3;PLEK2;UBASH3A;EDN2;LOC10602987816;LOC10602987811;ACTR3B;KCNIP2396;KCNIP2397;CYTH1;RAD51;PRKAA2;SNCAIP;LOC106049209;VPS25;DSCAM;MECOM;LOC106043688;ZFHX4;BOC;PKIA;NR3C1;FBLN1;IGF1;HNF4A;KCNIP2461;TGIF1;LUM;PARPBP;RUNX3;GRK4;NCMAP;LOC106038357;AKAP12…
18	GO:0042113	BP	B cell activation	18/ 2723	34/ 12028	0.529412	0.000113457	0.0116995	gene14367;gene11359;gene1484;gene1485;gene18685;gene7614;gene1912;gene20630;gene11238;gene12706;gene20631;gene8030;gene15751;gene16801;gene17853;gene14202;gene3922;gene8984	LOC10604643967;HSPD1;RAG2;RAG1;AICDA;MFNG;EXO1;KCNIP2630;CXCR5;ANKRD2206;KCNIP2631;IL7R;BCL6;PRKCB;CD40;MSH2;LOC106031806;CD40LG
18	GO:0050920	BP	regulation of chemotaxis	18/ 2723	34/ 12028	0.529412	0.000113457	0.0116995	gene7610;gene3187;gene4789;gene12661;gene7829;gene9713;gene3255;gene7400;gene13257;gene9869;gene13942;gene17316;gene11494;gene9870;gene15187;gene15768;gene3922;gene6420	RAC2;PTN;ANXA79;HSPB1;DSCAM;PLA2G7;TRPV4;ZSWIM6;CXCL1257;LOC106038356;RHOV2;EDN2;KIF20B94;LOC106038357;SEMA7A;CDH13;LOC106031806;MSTN
60	GO:0032101	BP	regulation of response to external stimulus	60/ 2723	168/ 12028	0.357143	0.000121322	0.0124186	gene3922;gene16286;gene3187;gene12661;gene13258;gene3255;gene2407;gene2596;gene15442;gene15751;gene20022;gene14089;gene19671;gene2836;gene1007;gene16609;gene3889;gene7321;gene7829;gene8472;gene3800;gene17581;gene9572;gene17316;gene20213;gene3860;gene11205;gene13942;gene9706;gene10561;gene17686;gene5733;gene15187;gene4789;gene20823;gene4565;gene16336;gene13257;gene9869;gene7400;gene7610;gene18524;…	LOC106031806;SAMHD1;PTN;HSPB1;CXCL1258;TRPV4;IL6;PPRC196;ANXA1;BCL6;PBK;GRIN3A;WNT4;LY96;PHLDB2;ADORA2B;IRF7;HGF;DSCAM;CRHR2;ARG2;TNFAIP6;DNASE1L3;EDN2;IL1B;COCH;LOC106039769;RHOV2;ENPP4;LOC106039090;TRAF3;SERPING1;SEMA7A;ANXA79;LOC106029694;TNFAIP3;CD9;CXCL1257;LOC106038356;ZSWIM6;RAC2;GPATCH3;LOC106030656;CDH13;LOC106032265;MSTN;IL1R2;PPARD;RGMA;HOPX;PPRC191;FASN;PTPN22;HMGB2;PRKCQ;CD226;KIF20B…
13	GO:0050921	BP	positive regulation of chemotaxis	13/ 2723	21/ 12028	0.619048	0.00012586	0.0126964	gene7610;gene3187;gene4789;gene12661;gene3255;gene13257;gene9869;gene7829;gene17316;gene9713;gene9870;gene6420;gene15768	RAC2;PTN;ANXA79;HSPB1;TRPV4;CXCL1257;LOC106038356;DSCAM;EDN2;PLA2G7;LOC106038357;MSTN;CDH13
16	GO:0002792	BP	negative regulation of peptide secretion	16/ 2723	29/ 12028	0.551724	0.000143646	0.014083	gene4021;gene2480;gene12858;gene13258;gene20631;gene4565;gene3800;gene777;gene12495;gene13257;gene7519;gene20630;gene15442;gene11205;gene2975;gene10561	ADRA2A;DPH3;IL1R2;CXCL1258;KCNIP2631;TNFAIP3;ARG2;CHGA;PTPN22;CXCL1257;IGF1;KCNIP2630;ANXA1;LOC106039769;VSNL1;LOC106039090
16	GO:0050709	BP	negative regulation of protein secretion	16/ 2723	29/ 12028	0.551724	0.000143646	0.014083	gene4021;gene2480;gene12858;gene13258;gene20631;gene4565;gene3800;gene777;gene12495;gene13257;gene7519;gene20630;gene15442;gene11205;gene2975;gene10561	ADRA2A;DPH3;IL1R2;CXCL1258;KCNIP2631;TNFAIP3;ARG2;CHGA;PTPN22;CXCL1257;IGF1;KCNIP2630;ANXA1;LOC106039769;VSNL1;LOC106039090
37	GO:0045321	BP	leukocyte activation	37/ 2723	92/ 12028	0.402174	0.000143653	0.014083	gene4693;gene11359;gene19671;gene777;gene11238;gene15442;gene8030;gene14367;gene19844;gene19845;gene17853;gene14202;gene3922;gene16645;gene6211;gene11169;gene1485;gene6216;gene7614;gene8984;gene9572;gene20631;gene17316;gene20213;gene1912;gene20630;gene2532;gene13257;gene1439;gene1484;gene14139;gene18685;gene12495;gene12706;gene15751;gene16801;gene14856	EGR1;HSPD1;WNT4;CHGA;CXCR5;ANXA1;IL7R;LOC10604643967;LOC106049328;LOC106049327;CD40;MSH2;LOC106031806;CCND3;LCP2;IL18;RAG1;DOCK2;MFNG;CD40LG;DNASE1L3;KCNIP2631;EDN2;IL1B;EXO1;KCNIP2630;PPRC132;CXCL1257;LOC1060464399;RAG2;CBFB;AICDA;PTPN22;ANKRD2206;BCL6;PRKCB;RAG16
809	GO:0050794	BP	regulation of cellular process	809/ 2723	3230/ 12028	0.250464	0.000152701	0.0147622	gene19498;gene8973;gene14361;gene18995;gene10067;gene15810;gene10060;gene7568;gene9085;gene9086;gene11901;gene5173;gene9475;gene8472;gene6174;gene3800;gene19150;gene9571;gene9572;gene3805;gene7810;gene17316;gene19016;gene19011;gene17645;gene16994;gene17468;gene17737;gene4973;gene16999;gene18638;gene7829;gene4080;gene14703;gene2826;gene899;gene2822;gene4724;gene9790;gene7519;gene1172;gene20461;gen…	LOC106048962;FGF13;TRIM71;CSF1;LOC106038552;LOC10604815310;IRS4;GSC8;ASNS;TAC1;BARX2;E2F4;LOC106037948;CRHR2;ARAP3;ARG2;TTK;ABHD6;DNASE1L3;PLEK2;UBASH3A;EDN2;LOC10602987816;LOC10602987811;ACTR3B;PRDM6;CYTH1;RAD51;PRKAA2;SNCAIP;VPS25;DSCAM;MECOM;LOC106043688;ZFHX4;BOC;PKIA;NR3C1;FBLN1;IGF1;HNF4A;KCNIP2461;TGIF1;LUM;PARPBP;RUNX3;GRK4;NCMAP;LOC106038357;AKAP12;FOS;LOC106034274;ARHGEF38;HSPB1;SFN;GPA…
17	GO:0050900	BP	leukocyte migration	17/ 2723	32/ 12028	0.53125	0.000166102	0.0158377	gene20213;gene19162;gene3187;gene11403;gene777;gene13257;gene9522;gene17316;gene1800;gene120;gene19844;gene19845;gene15442;gene12315;gene3922;gene12638;gene2370	IL1B;LOC106048595;PTN;KIF20B03;CHGA;CXCL1257;CEP5522;EDN2;ANO6;CH25H;LOC106049328;LOC106049327;ANXA1;SBDS;LOC106031806;LOC106041491;ITGB2
31	GO:0002694	BP	regulation of leukocyte activation	31/ 2723	73/ 12028	0.424658	0.000190898	0.017956	gene11359;gene15810;gene2407;gene2596;gene8030;gene15751;gene15442;gene14202;gene20630;gene3922;gene6988;gene7610;gene11169;gene1485;gene3800;gene8984;gene10230;gene18301;gene16609;gene20631;gene4565;gene13257;gene2415;gene14139;gene12495;gene10220;gene13348;gene2313;gene2315;gene2314;gene2370	HSPD1;LOC10604815310;IL6;PPRC196;IL7R;BCL6;ANXA1;MSH2;KCNIP2630;LOC106031806;CASP3;RAC2;IL18;RAG1;ARG2;CD40LG;GATA3;PRNP;ADORA2B;KCNIP2631;TNFAIP3;CXCL1257;GPNMB;CBFB;PTPN22;PRKCQ;CD226;CD28;LOC106030066;CTLA4;ITGB2
8	GO:0050710	BP	negative regulation of cytokine secretion	8/ 2723	10/ 12028	0.8	0.000196906	0.0183968	gene12858;gene4565;gene3800;gene12495;gene13257;gene15442;gene11205;gene10561	IL1R2;TNFAIP3;ARG2;PTPN22;CXCL1257;ANXA1;LOC106039769;LOC106039090
46	GO:0001817	BP	regulation of cytokine production	46/ 2723	123/ 12028	0.373984	0.000199758	0.0185389	gene4693;gene11359;gene12661;gene3255;gene3700;gene2407;gene2596;gene15751;gene15442;gene2836;gene3889;gene13411;gene13515;gene16609;gene4347;gene11169;gene2955;gene3800;gene20823;gene8984;gene18301;gene11205;gene19767;gene10561;gene17686;gene13258;gene15187;gene12566;gene14419;gene4565;gene15729;gene13257;gene12509;gene7661;gene18524;gene2415;gene11870;gene4021;gene7321;gene8538;gene12858;gene12…	EGR1;HSPD1;HSPB1;TRPV4;TLR5;IL6;PPRC196;BCL6;ANXA1;LY96;IRF7;PTGR21;WNT11;ADORA2B;LOC106032265;IL18;TRIB2;ARG2;LOC106029694;CD40LG;PRNP;LOC106039769;IRF8;LOC106039090;TRAF3;CXCL1258;SEMA7A;RAB7B;HOMER2;TNFAIP3;ANXA8L129;CXCL1257;WNT2B;ATF4;GPATCH3;GPNMB;EYA20;ADRA2A;HGF;LUM;IL1R2;PTPN22;PRKCQ;CD226;TIRAP;RAG16
15	GO:0005178	MF	integrin binding	15/ 2723	27/ 12028	0.555556	0.000209399	0.0193049	gene3937;gene16336;gene15187;gene16763;gene4796;gene16004;gene19621;gene9996;gene5713;gene11132;gene2415;gene2925;gene2150;gene5943;gene11764	ITGBL1;CD9;SEMA7A;ITGB3;TGFBI;SYK;MADCAM1;NOV;CIB2;THY1;GPNMB;ITGB1BP1;ITGB6;CYR61;GDAP1L14
68	GO:0051270	BP	regulation of cellular component movement	68/ 2723	200/ 12028	0.34	0.00022545	0.020513	gene15613;gene18627;gene15988;gene3187;gene6749;gene12661;gene11436;gene3255;gene2925;gene645;gene15768;gene14022;gene13699;gene3332;gene15751;gene15442;gene19671;gene3922;gene4262;gene13515;gene9552;gene11132;gene12800;gene16763;gene7321;gene5563;gene8059;gene4021;gene9571;gene17316;gene17281;gene13823;gene7610;gene13482;gene13942;gene11109;gene9164;gene13258;gene16336;gene15187;gene4789;gene186…	RHOB;PTRF;LOC106045044;PTN;PTPRM;HSPB1;WNT7A;TRPV4;ITGB1BP1;FGFBP1;CDH13;KANK1;PHLDA2;RHOF;BCL6;ANXA1;WNT4;LOC106031806;C1QTNF8;WNT11;CEP5552;THY1;MYOC;ITGB3;HGF;FGF7;ARHGEF39;ADRA2A;ABHD6;EDN2;SCD81;NUSAP13;RAC2;KCNE3;RHOV2;HSPA8;DSG2;CXCL1258;CD9;SEMA7A;ANXA79;PRCP;STC1;CPN116;MADCAM1;RET;CXCL1257;LOC106038356;ZSWIM6;GPNMB;LOC106046593;LAMA4;RLTPR;LAMA2;MSTN;FBLN1;KNDC162;BCAR1;DCN;SNAI1;PTPN22…
129	GO:0003700	MF	DNA-binding transcription factor activity	129/ 2723	427/ 12028	0.302108	0.000249757	0.0221457	gene2447;gene2078;gene3603;gene3889;gene11901;gene5173;gene7713;gene1463;gene4653;gene19016;gene4919;gene13125;gene12527;gene700;gene11124;gene16994;gene10918;gene12816;gene4965;gene4080;gene8380;gene4724;gene14493;gene12815;gene1172;gene7874;gene18862;gene9404;gene5536;gene10454;gene12723;gene2464;gene3054;gene2746;gene3742;gene15653;gene18740;gene6519;gene17183;gene2053;gene18979;gene4637;gene9…	HOXA2;KCNIP278;TBX3;IRF7;BARX2;E2F4;NR4A3;ALX4;PRDM1;LOC10602987816;EBF1;NR5A2;IRF6;RBPJ;LOC106039709;PRDM6;T;LOC106041556;JUN;MECOM;BHLHE40;NR3C1;BACH1;RXRG;HNF4A;LOC106036167;MYRF;RUNX3;MAFK;EBF3;ANKRD2223;CREB5;ARHGAP1954;RUNX1T1;ATF3;LOC1060458103;FOXM1;HLF;CPM3;FOSL2;RFX2;FOXO3;PASD1;FOXI1;OTX1;TCF7L2;TSC22D2;GRHL3;LOC106049496;BCL11A;NR4A2;PAPSS25;PAX1;SMAD7;RUNX1;RCOR1;RAG16;LOC106045119;R…
19	GO:0006022	BP	aminoglycan metabolic process	19/ 2723	38/ 12028	0.5	0.000255542	0.0225152	gene10004;gene290;gene16641;gene15726;gene8539;gene16642;gene5570;gene9984;gene7438;gene16443;gene15435;gene1716;gene10226;gene10225;gene17463;gene11773;gene5436;gene1404;gene1752	EXT1;CHST3;LOC106045866;ANXA8L126;DCN;LOC106045865;FBN1;HAS2;LOC106035746;B3GNT2;TMEM2;LYZ;ITIH2;ITIH5;ENGASE;IDUA;XYLT1;CHST1;GNS
30	GO:0004713	MF	protein tyrosine kinase activity	30/ 2723	71/ 12028	0.422535	0.000277541	0.0242997	gene15854;gene17105;gene16484;gene3030;gene18816;gene20014;gene20236;gene17812;gene15359;gene9536;gene11465;gene1040;gene18452;gene15062;gene3005;gene12357;gene421;gene16250;gene16004;gene12197;gene8107;gene19317;gene9468;gene12165;gene9293;gene19272;gene530;gene4820;gene10479;gene9649	INSR;BEST35;MATK;ARHGAP1930;LOC106048210;FGFR4;KCNIP2236;HCK;FGFR1;CEP5536;KIF20B65;EPHA6;NFKB252;ABL1;ARHGAP1905;FLT3;RET;NTRK2;SYK;SRC;NTRK3;MST1R;LCK;WEE1;BTK;EPHB6;FGFR3;CLK4;LYN;BLK
87	GO:0023057	BP	negative regulation of signaling	87/ 2723	271/ 12028	0.321033	0.00030142	0.0260625	gene11315;gene7983;gene3800;gene9571;gene7810;gene18301;gene7793;gene13258;gene14419;gene4973;gene18638;gene4080;gene11699;gene9790;gene7519;gene12495;gene12086;gene12661;gene777;gene11274;gene18524;gene12301;gene3742;gene20084;gene10982;gene13559;gene9552;gene16286;gene16281;gene4032;gene14022;gene11205;gene12566;gene20631;gene20630;gene14856;gene8009;gene4021;gene9039;gene1209;gene2591;gene2003…	RNF152;NIM1K;ARG2;ABHD6;UBASH3A;PRNP;SIK1;CXCL1258;HOMER2;PRKAA2;VPS25;MECOM;FGF9;FBLN1;IGF1;PTPN22;LOC106040774;HSPB1;CHGA;KCTD21;GPATCH3;RNF43;ATF3;COL2A1;CBLN1;SPRY1;CEP5552;SAMHD1;SLA2;TCF7L2;KANK1;LOC106039769;RAB7B;KCNIP2631;KCNIP2630;RAG16;DAB2;ADRA2A;LOC106037440;SNAI1;PPRC191;CLIC2;ACKR3;EGR1;DKK2;VSNL1;LOC106040422;HGF;PBK;SCD81;SOCS1;LOC106039090;LOC106042065;TNFAIP3;ARHGAP1989;TRABD2B…
87	GO:0010648	BP	negative regulation of cell communication	87/ 2723	271/ 12028	0.321033	0.00030142	0.0260625	gene11315;gene7983;gene3800;gene9571;gene7810;gene18301;gene7793;gene13258;gene14419;gene4973;gene18638;gene4080;gene11699;gene9790;gene7519;gene12495;gene12086;gene12661;gene777;gene11274;gene18524;gene12301;gene3742;gene20084;gene10982;gene13559;gene9552;gene16286;gene16281;gene4032;gene14022;gene11205;gene12566;gene20631;gene20630;gene14856;gene8009;gene4021;gene9039;gene1209;gene2591;gene2003…	RNF152;NIM1K;ARG2;ABHD6;UBASH3A;PRNP;SIK1;CXCL1258;HOMER2;PRKAA2;VPS25;MECOM;FGF9;FBLN1;IGF1;PTPN22;LOC106040774;HSPB1;CHGA;KCTD21;GPATCH3;RNF43;ATF3;COL2A1;CBLN1;SPRY1;CEP5552;SAMHD1;SLA2;TCF7L2;KANK1;LOC106039769;RAB7B;KCNIP2631;KCNIP2630;RAG16;DAB2;ADRA2A;LOC106037440;SNAI1;PPRC191;CLIC2;ACKR3;EGR1;DKK2;VSNL1;LOC106040422;HGF;PBK;SCD81;SOCS1;LOC106039090;LOC106042065;TNFAIP3;ARHGAP1989;TRABD2B…
14	GO:1903034	BP	regulation of response to wounding	14/ 2723	25/ 12028	0.56	0.0003053	0.0262351	gene4021;gene13258;gene3187;gene5733;gene2591;gene16336;gene14022;gene13257;gene10220;gene15442;gene19671;gene1007;gene9706;gene8127	ADRA2A;CXCL1258;PTN;SERPING1;PPRC191;CD9;KANK1;CXCL1257;PRKCQ;ANXA1;WNT4;PHLDB2;ENPP4;RGMA
32	GO:0050865	BP	regulation of cell activation	32/ 2723	78/ 12028	0.410256	0.00032056	0.0272104	gene11359;gene15810;gene2407;gene2596;gene8030;gene15751;gene15442;gene14202;gene20630;gene3922;gene16609;gene7610;gene11169;gene1485;gene3800;gene10230;gene8984;gene18301;gene6988;gene20631;gene4565;gene16336;gene13257;gene2415;gene14139;gene12495;gene10220;gene13348;gene2313;gene2315;gene2314;gene2370	HSPD1;LOC10604815310;IL6;PPRC196;IL7R;BCL6;ANXA1;MSH2;KCNIP2630;LOC106031806;ADORA2B;RAC2;IL18;RAG1;ARG2;GATA3;CD40LG;PRNP;CASP3;KCNIP2631;TNFAIP3;CD9;CXCL1257;GPNMB;CBFB;PTPN22;PRKCQ;CD226;CD28;LOC106030066;CTLA4;ITGB2
10	GO:0097529	BP	myeloid leukocyte migration	10/ 2723	15/ 12028	0.666667	0.000334333	0.0282076	gene19162;gene11403;gene777;gene9522;gene17316;gene19844;gene19845;gene15442;gene12638;gene2370	LOC106048595;KIF20B03;CHGA;CEP5522;EDN2;LOC106049328;LOC106049327;ANXA1;LOC106041491;ITGB2
53	GO:0051493	BP	regulation of cytoskeleton organization	53/ 2723	149/ 12028	0.355705	0.000344145	0.0286638	gene11987;gene15613;gene11985;gene8973;gene10048;gene1394;gene2925;gene11883;gene4209;gene12024;gene3332;gene3885;gene5505;gene19671;gene1007;gene13411;gene13515;gene9552;gene7326;gene12800;gene5782;gene17622;gene14022;gene5162;gene13238;gene17645;gene3696;gene17263;gene5593;gene12773;gene4952;gene2738;gene4973;gene13257;gene10811;gene3617;gene3673;gene5146;gene4110;gene581;gene11205;gene6427;gen…	GSN;RHOB;CNTRL;FGF13;CAPN6;RHOV;ITGB1BP1;CHEK1;LOC106032083;LOC106040731;RHOF;RASSF7;BAIAP2L1;WNT4;PHLDB2;PTGR21;WNT11;CEP5552;SEMA3E;MYOC;KIF18A;FMNL1;KANK1;RLTPR;CXCL1238;ACTR3B;CAPN2;SPIRE2;LOC106033657;NOTCH2;LOC1060339722;TMEM67;PRKAA2;CXCL1257;LOC106039322;PLEKHH2;NEK2;HSD11B2;ECT2;AFAP1;LOC106039769;CDC42EP4;GNAI1;LIMK1;ITGB3;TPX2;LPAR1;KAT2B;SNX9;ARHGAP6;KIF11;LIMA1;MSX18
19	GO:1904950	BP	negative regulation of establishment of protein localization	19/ 2723	39/ 12028	0.487179	0.000349564	0.0286638	gene4021;gene2480;gene12858;gene14934;gene13258;gene20631;gene4565;gene3800;gene777;gene12495;gene13257;gene7519;gene15442;gene2925;gene20630;gene2636;gene11205;gene2975;gene10561	ADRA2A;DPH3;IL1R2;NDFIP2;CXCL1258;KCNIP2631;TNFAIP3;ARG2;CHGA;PTPN22;CXCL1257;IGF1;ANXA1;ITGB1BP1;KCNIP2630;RAB23;LOC106039769;VSNL1;LOC106039090
19	GO:0051224	BP	negative regulation of protein transport	19/ 2723	39/ 12028	0.487179	0.000349564	0.0286638	gene4021;gene2480;gene12858;gene14934;gene13258;gene20631;gene4565;gene3800;gene777;gene12495;gene13257;gene7519;gene15442;gene2925;gene20630;gene2636;gene11205;gene2975;gene10561	ADRA2A;DPH3;IL1R2;NDFIP2;CXCL1258;KCNIP2631;TNFAIP3;ARG2;CHGA;PTPN22;CXCL1257;IGF1;ANXA1;ITGB1BP1;KCNIP2630;RAB23;LOC106039769;VSNL1;LOC106039090
12	GO:0002819	BP	regulation of adaptive immune response	12/ 2723	20/ 12028	0.6	0.000350036	0.0286638	gene11359;gene15810;gene13348;gene19722;gene19720;gene10220;gene8030;gene15751;gene4565;gene15442;gene14202;gene3889	HSPD1;LOC10604815310;CD226;LOC106049209;LOC106049205;PRKCQ;IL7R;BCL6;TNFAIP3;ANXA1;MSH2;IRF7
24	GO:1901681	MF	sulfur compound binding	24/ 2723	53/ 12028	0.45283	0.000377926	0.0307667	gene3187;gene9996;gene11906;gene8066;gene6420;gene8070;gene13629;gene19080;gene13784;gene564;gene5091;gene7975;gene5943;gene390;gene2473;gene2415;gene12882;gene19706;gene13189;gene8067;gene19081;gene3818;gene15122;gene18555	PTN;NOV;APLP2;LOC106036393;MSTN;LOC106036308;SOAT1;LOC10602987880;ACBD5;DNMBP4;MMACHC;FGF10;CYR61;OGDHL;HACL1;GPNMB;TPMT;ECM2;LOC106042065;LOC106036392;LOC10602987881;THBS1;LOC106044084;COMP
86	GO:0007155	BP	cell adhesion	86/ 2723	270/ 12028	0.318519	0.000400378	0.032405	gene11197;gene1822;gene4796;gene5700;gene16670;gene20275;gene9163;gene9162;gene18555;gene9164;gene19911;gene15550;gene13549;gene19080;gene19081;gene3818;gene20156;gene6346;gene12123;gene2370;gene2296;gene10982;gene4870;gene13809;gene15313;gene17581;gene18133;gene20006;gene8097;gene12158;gene13027;gene15491;gene19975;gene20631;gene20630;gene19621;gene16356;gene17324;gene11875;gene4508;gene1496;gen…	DSCAML1;CNTN1;TGFBI;TLN2;PKP1;KCNIP2275;LOC106037566;LOC106037565;COMP;DSG2;SDK2;MXRA8;FAT4;LOC10602987880;LOC10602987881;THBS1;LOC106049646;FN1;CDH4;ITGB2;ITGA4;CBLN1;FAT2;VCAN;EPDR1;TNFAIP6;SCARF2;LOC106049502;HAPLN3;LYVE1;HPSE;LOC106044537;LOC106049466;KCNIP2631;KCNIP2630;MADCAM1;ITGA9;LOC106046593;ROBO4;LAMA2;CD44;LOC106044084;F54;PCDH19;LOC106049429;LOC106030627;LOC106046116;RAC2;SUSD5;CDH13…
40	GO:0051272	BP	positive regulation of cellular component movement	40/ 2723	106/ 12028	0.377358	0.000413413	0.0332666	gene15613;gene18627;gene3187;gene12661;gene11436;gene3255;gene645;gene15768;gene15751;gene15442;gene4262;gene13515;gene9552;gene12800;gene16763;gene7321;gene5563;gene8059;gene14127;gene17316;gene13942;gene11109;gene13258;gene15187;gene4789;gene19621;gene421;gene13257;gene9869;gene7610;gene2925;gene5162;gene6420;gene4021;gene1209;gene7829;gene2415;gene5943;gene9870;gene9713	RHOB;PTRF;PTN;HSPB1;WNT7A;TRPV4;FGFBP1;CDH13;BCL6;ANXA1;C1QTNF8;WNT11;CEP5552;MYOC;ITGB3;HGF;FGF7;ARHGEF39;BCAR1;EDN2;RHOV2;HSPA8;CXCL1258;SEMA7A;ANXA79;MADCAM1;RET;CXCL1257;LOC106038356;RAC2;ITGB1BP1;RLTPR;MSTN;ADRA2A;SNAI1;DSCAM;GPNMB;CYR61;LOC106038357;PLA2G7
36	GO:0043235	CC	receptor complex	36/ 2723	93/ 12028	0.387097	0.00043669	0.0349377	gene11359;gene12268;gene6965;gene2407;gene2296;gene15988;gene3669;gene14089;gene2836;gene2150;gene16763;gene17608;gene4053;gene20236;gene9571;gene11771;gene7691;gene10561;gene17686;gene7378;gene12773;gene2120;gene421;gene12427;gene16356;gene16250;gene6247;gene16004;gene4021;gene3937;gene5452;gene2985;gene9522;gene19161;gene10578;gene2370	HSPD1;ACVR2A;MTNR1A;IL6;ITGA4;LOC106045044;TRAF5;GRIN3A;LY96;ITGB6;ITGB3;CD79B;GFRA1;KCNIP2236;ABHD6;CHRNB3;GABBR2;LOC106039090;TRAF3;IL31RA;NOTCH2;ADAM80;RET;GRIN2A;ITGA9;NTRK2;GABRB2;SYK;ADRA2A;ITGBL1;GPRC5B;KCTD8;CEP5522;IL11RA;CHRNA9;ITGB2
13	GO:0042129	BP	regulation of T cell proliferation	13/ 2723	23/ 12028	0.565217	0.000445141	0.0354104	gene6988;gene7610;gene15810;gene3800;gene12495;gene2407;gene10220;gene8984;gene2415;gene18301;gene15442;gene2313;gene2314	CASP3;RAC2;LOC10604815310;ARG2;PTPN22;IL6;PRKCQ;CD40LG;GPNMB;PRNP;ANXA1;CD28;CTLA4
21	GO:0050863	BP	regulation of T cell activation	21/ 2723	45/ 12028	0.466667	0.000451161	0.0355571	gene6988;gene14139;gene11359;gene1485;gene15810;gene3800;gene15751;gene8984;gene2407;gene12495;gene10220;gene8030;gene7610;gene2596;gene18301;gene15442;gene10230;gene2415;gene2314;gene2315;gene2313	CASP3;CBFB;HSPD1;RAG1;LOC10604815310;ARG2;BCL6;CD40LG;IL6;PTPN22;PRKCQ;IL7R;RAC2;PPRC196;PRNP;ANXA1;GATA3;GPNMB;CTLA4;LOC106030066;CD28
43	GO:0001775	BP	cell activation	43/ 2723	116/ 12028	0.37069	0.000470602	0.0361947	gene4693;gene11359;gene19671;gene11436;gene777;gene11238;gene15442;gene8030;gene14367;gene19844;gene19845;gene17853;gene14202;gene3922;gene16645;gene6211;gene20213;gene11169;gene1485;gene6216;gene7614;gene8984;gene9572;gene20631;gene17316;gene10561;gene13258;gene1912;gene20630;gene2532;gene14139;gene13257;gene1439;gene1484;gene4021;gene7519;gene18685;gene15351;gene12495;gene12706;gene15751;gene16…	EGR1;HSPD1;WNT4;WNT7A;CHGA;CXCR5;ANXA1;IL7R;LOC10604643967;LOC106049328;LOC106049327;CD40;MSH2;LOC106031806;CCND3;LCP2;IL1B;IL18;RAG1;DOCK2;MFNG;CD40LG;DNASE1L3;KCNIP2631;EDN2;LOC106039090;CXCL1258;EXO1;KCNIP2630;PPRC132;CBFB;CXCL1257;LOC1060464399;RAG2;ADRA2A;IGF1;AICDA;LOC106044437;PTPN22;ANKRD2206;BCL6;PRKCB;RAG16
198	GO:0009966	BP	regulation of signal transduction	198/ 2723	705/ 12028	0.280851	0.000496129	0.037864	gene15613;gene16286;gene3279;gene645;gene11989;gene10693;gene16220;gene4367;gene6275;gene2836;gene3922;gene9366;gene15768;gene7983;gene9552;gene9571;gene9004;gene7810;gene18301;gene12638;gene7793;gene13047;gene13258;gene17468;gene14419;gene4973;gene10690;gene18638;gene4974;gene4080;gene2407;gene11699;gene10990;gene11855;gene14784;gene9790;gene7519;gene17807;gene2864;gene12495;gene12086;gene12509;…	RHOB;SAMHD1;FICD;FGFBP1;DAB2IP;LOC106039183;DKK2;GUCY1A3;ARHGEF37;LY96;LOC106031806;CNKSR2;CDH13;NIM1K;CEP5552;ABHD6;GPC4;UBASH3A;PRNP;LOC106041491;SIK1;HSD17B11;CXCL1258;CYTH1;HOMER2;PRKAA2;GPC1;VPS25;PPAP2B;MECOM;IL6;FGF9;NETO2;SLC2A105;RAP1GAP2;FBLN1;IGF1;DUSP15;SULF1;PTPN22;LOC106040774;WNT2B;AKAP12;ARHGEF10;ACVR2A;ARHGEF38;HSPB1;KCTD21;GPATCH3;RNF43;ATF3;RAMP3;PKIG7;GPC5;COL2A1;CBLN1;SPRY1;A…
102	GO:0005576	CC	extracellular region	102/ 2723	330/ 12028	0.309091	0.000497745	0.037864	gene20665;gene8973;gene645;gene1589;gene2830;gene2831;gene5780;gene6478;gene1130;gene17316;gene18301;gene12638;gene18555;gene20396;gene18985;gene4522;gene11699;gene11855;gene19080;gene19081;gene9790;gene16477;gene5330;gene6346;gene12725;gene3187;gene5814;gene4262;gene10982;gene15312;gene15313;gene13967;gene11205;gene7975;gene11570;gene13562;gene8924;gene1716;gene16220;gene2139;gene18088;gene12288…	LOC106029527;FGF13;FGFBP1;LOC1060481539;CRISPLD1;PI15;BDNF;LOC106034642;LIPI;EDN2;PRNP;LOC106041491;COMP;KCNIP2396;NRTN;CTGF;FGF9;SLC2A105;LOC10602987880;LOC10602987881;FBLN1;LOC106045698;LOC1060333280;FN1;ANKRD2225;PTN;AFAP14;C1QTNF8;CBLN1;SFRP4;EPDR1;INHBA;LOC106039769;FGF10;STK40;PLA2G4F2;LIPG;LYZ;DKK2;LOC106029858;B2M;LOC106041089;LOC10604643922;PAM;C1QTNF3;LOC106031936;PLAT;KCNIP2338;LOC1060…
226	GO:0010646	BP	regulation of cell communication	226/ 2723	817/ 12028	0.276622	0.000523191	0.0395834	gene15613;gene3279;gene645;gene2407;gene10693;gene16220;gene4367;gene6275;gene14089;gene2836;gene3922;gene9366;gene15768;gene7316;gene3800;gene9552;gene9571;gene11870;gene9004;gene7810;gene19011;gene18301;gene1662;gene12638;gene7793;gene13047;gene13258;gene17468;gene12651;gene14419;gene4973;gene10690;gene16999;gene13257;gene4974;gene2105;gene4080;gene11989;gene11699;gene10990;gene11855;gene14784;…	RHOB;FICD;FGFBP1;IL6;LOC106039183;DKK2;GUCY1A3;ARHGEF37;GRIN3A;LY96;LOC106031806;CNKSR2;CDH13;GNAI1;ARG2;CEP5552;ABHD6;EYA20;GPC4;UBASH3A;LOC10602987811;PRNP;SYT1;LOC106041491;SIK1;HSD17B11;CXCL1258;CYTH1;RASL10B;HOMER2;PRKAA2;GPC1;SNCAIP;CXCL1257;PPAP2B;ADCY5;MECOM;DAB2IP;FGF9;NETO2;SLC2A105;RAP1GAP2;FBLN1;IGF1;HNF4A;LOC1060407007;DUSP15;SULF1;PTPN22;LOC106040774;WNT2B;AKAP12;BLK;ARHGEF10;ACVR2A…
86	GO:0022610	BP	biological adhesion	86/ 2723	271/ 12028	0.317343	0.000527384	0.0396849	gene11197;gene1822;gene4796;gene5700;gene16670;gene20275;gene9163;gene9162;gene18555;gene9164;gene19911;gene15550;gene13549;gene19080;gene19081;gene3818;gene20156;gene6346;gene12123;gene2370;gene2296;gene10982;gene4870;gene13809;gene15313;gene17581;gene18133;gene20006;gene8097;gene12158;gene13027;gene15491;gene19975;gene20631;gene20630;gene19621;gene16356;gene17324;gene11875;gene4508;gene1496;gen…	DSCAML1;CNTN1;TGFBI;TLN2;PKP1;KCNIP2275;LOC106037566;LOC106037565;COMP;DSG2;SDK2;MXRA8;FAT4;LOC10602987880;LOC10602987881;THBS1;LOC106049646;FN1;CDH4;ITGB2;ITGA4;CBLN1;FAT2;VCAN;EPDR1;TNFAIP6;SCARF2;LOC106049502;HAPLN3;LYVE1;HPSE;LOC106044537;LOC106049466;KCNIP2631;KCNIP2630;MADCAM1;ITGA9;LOC106046593;ROBO4;LAMA2;CD44;LOC106044084;F54;PCDH19;LOC106049429;LOC106030627;LOC106046116;RAC2;SUSD5;CDH13…
268	GO:0048523	BP	negative regulation of cellular process	268/ 2723	987/ 12028	0.27153	0.000545379	0.0408184	gene11987;gene15613;gene11359;gene8973;gene14361;gene16220;gene3842;gene17471;gene11350;gene10690;gene4965;gene2407;gene2078;gene4361;gene13515;gene9085;gene12509;gene1335;gene11901;gene2480;gene15768;gene7316;gene3800;gene9552;gene19150;gene9571;gene5943;gene2822;gene7810;gene13238;gene18302;gene16539;gene18301;gene3476;gene13942;gene2088;gene11109;gene13258;gene10080;gene16576;gene14419;gene497…	GSN;RHOB;HSPD1;FGF13;TRIM71;DKK2;ACTC1;SOCS3;HECW2;GPC1;JUN;IL6;KCNIP278;RBM46;WNT11;ASNS;WNT2B;LOC106040700;BARX2;DPH3;CDH13;GNAI1;ARG2;CEP5552;TTK;ABHD6;CYR61;PKIA;UBASH3A;CXCL1238;PROM2;MARCH839;PRNP;SERPIND1;RHOV2;TFCP2L1;HSPA8;CXCL1258;XIAP;MARCH876;HOMER2;PRKAA2;ARHGAP1999;BRINP1;PPAPDC3;CXCL1257;DSCAM;PLEKHH2;MECOM;FGF9;LIMK1;NR3C1;FBLN1;IGF1;LOC106041556;ANGPTL4;LPAR1;PTPN22;PARPBP;LOC106…
80	GO:0008289	MF	lipid binding	80/ 2723	250/ 12028	0.32	0.000563626	0.0418581	gene10720;gene11359;gene2139;gene2442;gene13456;gene2699;gene3255;gene7060;gene11205;gene16053;gene1589;gene7598;gene12394;gene13989;gene6517;gene2836;gene3922;gene13411;gene1358;gene8094;gene4102;gene5524;gene1484;gene1430;gene6174;gene15442;gene6496;gene4837;gene3805;gene19262;gene13629;gene10779;gene20778;gene13784;gene18302;gene1662;gene3845;gene11109;gene15288;gene15289;gene16996;gene5718;ge…	OPA1;HSPD1;LOC106029858;SNX10;STARD4;SH3YL1;TRPV4;SNX31;LOC106039769;FABP3;LOC1060481539;LOC1060337568;STARD13;COL4A3BP;PCTP;LY96;LOC106031806;PTGR21;LOC106042968;RLBP1;PLD1;ADAP1;RAG2;PACSIN3;ARAP3;ANXA1;ADAP2;LOC106032815;PLEK2;BIN2;SOAT1;ESYT3;KCNIP2778;ACBD5;PROM2;SYT1;STXBP6;HSPA8;LOC106044297;RBP7;SNX24;CPN118;SNX22;MARCH874;SDPR;ANXA11;UNC13C;LOC106039322;NCF1;FABP5;FABP6;LOC106029718;LOC1…
96	GO:0051240	BP	positive regulation of multicellular organismal process	96/ 2723	310/ 12028	0.309677	0.00057055	0.0420244	gene11359;gene18995;gene10690;gene645;gene2407;gene2836;gene3889;gene8984;gene17316;gene13258;gene13257;gene7661;gene11699;gene12312;gene5338;gene12495;gene12268;gene3187;gene12661;gene19633;gene1007;gene10982;gene13559;gene16609;gene11169;gene1485;gene7829;gene8665;gene9706;gene8803;gene3857;gene12566;gene15729;gene2804;gene11870;gene4021;gene1209;gene9031;gene2596;gene4580;gene4693;gene15988;ge…	HSPD1;CSF1;GPC1;FGFBP1;IL6;LY96;IRF7;CD40LG;EDN2;CXCL1258;CXCL1257;ATF4;FGF9;LIMK1;LOC1060333288;PTPN22;ACVR2A;PTN;HSPB1;S100A1;PHLDB2;CBLN1;SPRY1;ADORA2B;IL18;RAG1;DSCAM;BRINP1;ENPP4;PRKCH;PRKD1;RAB7B;ANXA8L129;FABP5;EYA20;ADRA2A;SNAI1;GDPD2;PPRC196;CITED2;EGR1;LOC106045044;BRINP3;MC4R;LOC1060298781;TRPC3;IL7R;MSH2;HGF;BCAR1;AMIGO2;WNT6;ADIPOR2;CYR61;CBFB;SEMA7A;HRH2;TNFAIP3;WNT2B;LOC106049694;L…
5	GO:0032653	BP	regulation of interleukin-10 production	5/ 2723	5/ 12028	1	0.000592975	0.0429938	gene14856;gene8984;gene11359;gene7321;gene2955	RAG16;CD40LG;HSPD1;HGF;TRIB2
5	GO:2000482	BP	regulation of interleukin-8 secretion	5/ 2723	5/ 12028	1	0.000592975	0.0429938	gene15442;gene13258;gene12495;gene13257;gene10561	ANXA1;CXCL1258;PTPN22;CXCL1257;LOC106039090
5	GO:0050849	BP	negative regulation of calcium-mediated signaling	5/ 2723	5/ 12028	1	0.000592975	0.0429938	gene20631;gene20630;gene18301;gene20035;gene14419	KCNIP2631;KCNIP2630;PRNP;CLIC2;HOMER2
35	GO:0001664	MF	G protein-coupled receptor binding	35/ 2723	91/ 12028	0.384615	0.000610028	0.044001	gene16306;gene12636;gene19671;gene11436;gene923;gene12301;gene3122;gene19844;gene19845;gene13515;gene11855;gene6455;gene12195;gene9532;gene132;gene17316;gene12288;gene12638;gene11109;gene12292;gene12290;gene12291;gene4789;gene18301;gene13081;gene15621;gene12509;gene7316;gene4021;gene8439;gene14137;gene10796;gene5185;gene19163;gene19162	LOC106045455;LOC106041492;WNT4;WNT7A;LOC106038263;RNF43;CECR1;LOC106049328;LOC106049327;WNT11;SLC2A105;GNA13;LOC106040927;RSPO1;CXCL12;EDN2;LOC106041089;LOC106041491;HSPA8;ATP9A2;ATP9A0;ATP9A1;ANXA79;PRNP;MTHFD2L;CNRIP1;WNT2B;GNAI1;ADRA2A;WNT3A;GNAO1;WNT10A;LOC106033294;LOC106048600;LOC106048595
227	GO:0023051	BP	regulation of signaling	227/ 2723	823/ 12028	0.27582	0.000640576	0.0459663	gene15613;gene3279;gene645;gene2407;gene10693;gene16220;gene4367;gene6275;gene14089;gene2836;gene3922;gene9366;gene15768;gene7316;gene3800;gene9552;gene9571;gene11870;gene9004;gene7810;gene19011;gene18301;gene1662;gene12638;gene7793;gene13047;gene13258;gene17468;gene12651;gene14419;gene4973;gene10690;gene16999;gene13257;gene4974;gene2105;gene4080;gene11989;gene11699;gene10990;gene11855;gene14784;…	RHOB;FICD;FGFBP1;IL6;LOC106039183;DKK2;GUCY1A3;ARHGEF37;GRIN3A;LY96;LOC106031806;CNKSR2;CDH13;GNAI1;ARG2;CEP5552;ABHD6;EYA20;GPC4;UBASH3A;LOC10602987811;PRNP;SYT1;LOC106041491;SIK1;HSD17B11;CXCL1258;CYTH1;RASL10B;HOMER2;PRKAA2;GPC1;SNCAIP;CXCL1257;PPAP2B;ADCY5;MECOM;DAB2IP;FGF9;NETO2;SLC2A105;RAP1GAP2;FBLN1;IGF1;HNF4A;LOC1060407007;DUSP15;SULF1;PTPN22;LOC106040774;WNT2B;AKAP12;BLK;ARHGEF10;ACVR2A…
12	GO:0002687	BP	positive regulation of leukocyte migration	12/ 2723	21/ 12028	0.571429	0.000648937	0.0460911	gene7610;gene3187;gene16763;gene3255;gene19621;gene13257;gene9869;gene17316;gene9713;gene9870;gene6420;gene4789	RAC2;PTN;ITGB3;TRPV4;MADCAM1;CXCL1257;LOC106038356;EDN2;PLA2G7;LOC106038357;MSTN;ANXA79
12	GO:0061041	BP	regulation of wound healing	12/ 2723	21/ 12028	0.571429	0.000648937	0.0460911	gene4021;gene13258;gene19671;gene5733;gene2591;gene16336;gene14022;gene13257;gene10220;gene15442;gene1007;gene9706	ADRA2A;CXCL1258;WNT4;SERPING1;PPRC191;CD9;KANK1;CXCL1257;PRKCQ;ANXA1;PHLDB2;ENPP4
73	GO:0040011	BP	locomotion	73/ 2723	224/ 12028	0.325893	0.000663853	0.0466742	gene15613;gene11588;gene3187;gene19390;gene11436;gene12427;gene777;gene11238;gene11989;gene1209;gene3332;gene14442;gene1800;gene12589;gene19844;gene19845;gene15442;gene8973;gene3922;gene12205;gene13515;gene20213;gene7610;gene16763;gene7321;gene17302;gene15338;gene12998;gene14022;gene17316;gene2925;gene4565;gene11205;gene13942;gene12638;gene10735;gene5943;gene9867;gene10138;gene15187;gene3937;gene…	RHOB;DNAJA1;PTN;DOCK5;WNT7A;GRIN2A;CHGA;CXCR5;DAB2IP;SNAI1;RHOF;RCAN1;ANO6;STAMBPL189;LOC106049328;LOC106049327;ANXA1;FGF13;LOC106031806;SDC4;WNT11;IL1B;RAC2;ITGB3;HGF;PTAFR;PLAT;CCR4;KANK1;EDN2;ITGB1BP1;TNFAIP3;LOC106039769;RHOV2;LOC106041491;CXCR4;CYR61;XCR1;SLC35G138;SEMA7A;ITGBL1;KIF20B03;ANXA8L129;ACKR4;RET;PSTPIP2;LOC106038356;LOC106045913;NTRK2;CX3CR1;LOC106038377;RHOG;PRKCQ;CDH13;SBDS;CXC…
7	GO:0002637	BP	regulation of immunoglobulin production	7/ 2723	9/ 12028	0.777778	0.000702712	0.0491581	gene20631;gene20630;gene2596;gene2407;gene8984;gene15751;gene14202	KCNIP2631;KCNIP2630;PPRC196;IL6;CD40LG;BCL6;MSH2
62	GO:2000145	BP	regulation of cell motility	62/ 2723	185/ 12028	0.335135	0.000707859	0.0492175	gene3922;gene15613;gene18627;gene15988;gene3187;gene12661;gene11436;gene3255;gene2925;gene645;gene15768;gene9571;gene13699;gene3332;gene6749;gene15442;gene19671;gene1007;gene4262;gene13515;gene11132;gene12800;gene16763;gene7321;gene5563;gene8059;gene14022;gene17316;gene17281;gene13823;gene13942;gene5716;gene11109;gene11494;gene13258;gene16336;gene15187;gene4789;gene18649;gene19382;gene4021;gene19…	LOC106031806;RHOB;PTRF;LOC106045044;PTN;HSPB1;WNT7A;TRPV4;ITGB1BP1;FGFBP1;CDH13;ABHD6;PHLDA2;RHOF;PTPRM;ANXA1;WNT4;PHLDB2;C1QTNF8;WNT11;THY1;MYOC;ITGB3;HGF;FGF7;ARHGEF39;KANK1;EDN2;SCD81;NUSAP13;RHOV2;CPN116;HSPA8;KIF20B94;CXCL1258;CD9;SEMA7A;ANXA79;PRCP;STC1;ADRA2A;MADCAM1;RET;CXCL1257;LOC106038356;RAC2;LOC106046593;LAMA4;RLTPR;LAMA2;MSTN;FBLN1;KNDC162;BCAR1;DCN;SNAI1;PTPN22;F54;GPNMB;CYR61;LOC1…
10	GO:0002690	BP	positive regulation of leukocyte chemotaxis	10/ 2723	16/ 12028	0.625	0.000710632	0.0492175	gene7610;gene3187;gene4789;gene3255;gene13257;gene9869;gene17316;gene9870;gene9713;gene6420	RAC2;PTN;ANXA79;TRPV4;CXCL1257;LOC106038356;EDN2;LOC106038357;PLA2G7;MSTN
6	GO:0005832	CC	chaperonin-containing T-complex	6/ 2723	7/ 12028	0.857143	0.000756587	0.0521408	gene1713;gene8648;gene10955;gene12630;gene8301;gene8228	CCT2;KIF1148;TCP1;CCT6A;CCT4;PTPN218
43	GO:0030155	BP	regulation of cell adhesion	43/ 2723	118/ 12028	0.364407	0.000801081	0.0549352	gene16763;gene11359;gene19671;gene15810;gene3255;gene2407;gene10230;gene8030;gene15988;gene15442;gene1007;gene6988;gene7326;gene12800;gene1485;gene7829;gene3800;gene14022;gene8984;gene18301;gene11205;gene5943;gene14139;gene16336;gene421;gene2415;gene937;gene7610;gene1932;gene2925;gene19706;gene4601;gene4508;gene15768;gene9790;gene12495;gene4580;gene9134;gene10220;gene15751;gene13658;gene17324;gen…	ITGB3;HSPD1;WNT4;LOC10604815310;TRPV4;IL6;GATA3;IL7R;LOC106045044;ANXA1;PHLDB2;CASP3;SEMA3E;MYOC;RAG1;DSCAM;ARG2;KANK1;CD40LG;PRNP;LOC106039769;CYR61;CBFB;CD9;RET;GPNMB;COL8A1;RAC2;KIF26B;ITGB1BP1;ECM2;LAMA4;LAMA2;CDH13;FBLN1;PTPN22;CITED2;F54;PRKCQ;BCL6;ARHGAP6;LOC106046593;LOC106030066
14	GO:0008201	MF	heparin binding	14/ 2723	27/ 12028	0.518519	0.000863364	0.0583442	gene5943;gene3187;gene3818;gene15122;gene19081;gene9996;gene19706;gene2415;gene19080;gene11906;gene564;gene7975;gene18555;gene6420	CYR61;PTN;THBS1;LOC106044084;LOC10602987881;NOV;ECM2;GPNMB;LOC10602987880;APLP2;DNMBP4;FGF10;COMP;MSTN
48	GO:1903047	BP	mitotic cell cycle process	48/ 2723	137/ 12028	0.350365	0.000928163	0.0624201	gene2690;gene15613;gene9552;gene5647;gene18427;gene2720;gene15394;gene14202;gene5032;gene13411;gene13559;gene13398;gene18285;gene5782;gene6218;gene20369;gene6723;gene19150;gene18493;gene9675;gene5173;gene13867;gene95;gene16645;gene3574;gene658;gene15997;gene10399;gene1382;gene3673;gene349;gene12315;gene17757;gene4483;gene1261;gene7440;gene9605;gene2496;gene17415;gene20037;gene9911;gene11338;gene1…	ARHGEF10;RHOB;CEP5552;DNMBP47;NFKB227;CCNE2;LZTS1;MSH2;CDKN2C;PTGR21;SPRY1;BUB1;NCAPH;KIF18A;LOC10603787018;INCENP;NDC80;TTK;NFKB293;MCM3;E2F4;ERCC667;CEP55;CCND3;CIT;NCAPG;CKS2;LOC106039004;NUSAP1;NEK2;CDK1;SBDS;BUB1B;TPD52L1;AURKA;MITD1;MCM2;SGOL1;NDEL1;KCNIP2037;MCM4;NABP1;RAD51;TIPIN;KIF11;SNX9;TICRR;SPC25
64	GO:0040012	BP	regulation of locomotion	64/ 2723	194/ 12028	0.329897	0.00094512	0.0629836	gene15613;gene18627;gene15988;gene3187;gene12661;gene11436;gene3255;gene2925;gene645;gene15768;gene14022;gene13699;gene3332;gene6749;gene15442;gene19671;gene3922;gene4262;gene13515;gene11132;gene12800;gene16763;gene7321;gene5563;gene8059;gene4021;gene9571;gene17316;gene17281;gene13823;gene7610;gene13942;gene11109;gene11494;gene13258;gene16336;gene15187;gene4789;gene18649;gene19382;gene5716;gene19…	RHOB;PTRF;LOC106045044;PTN;HSPB1;WNT7A;TRPV4;ITGB1BP1;FGFBP1;CDH13;KANK1;PHLDA2;RHOF;PTPRM;ANXA1;WNT4;LOC106031806;C1QTNF8;WNT11;THY1;MYOC;ITGB3;HGF;FGF7;ARHGEF39;ADRA2A;ABHD6;EDN2;SCD81;NUSAP13;RAC2;RHOV2;HSPA8;KIF20B94;CXCL1258;CD9;SEMA7A;ANXA79;PRCP;STC1;CPN116;MADCAM1;RET;CXCL1257;LOC106038356;ZSWIM6;GPNMB;LOC106046593;LAMA4;RLTPR;LAMA2;MSTN;FBLN1;KNDC162;BCAR1;DCN;SNAI1;PTPN22;F54;DSCAM;PHLD…
11	GO:0002688	BP	regulation of leukocyte chemotaxis	11/ 2723	19/ 12028	0.578947	0.00094559	0.0629836	gene7610;gene3187;gene4789;gene3255;gene13257;gene9869;gene17316;gene11494;gene9870;gene9713;gene6420	RAC2;PTN;ANXA79;TRPV4;CXCL1257;LOC106038356;EDN2;KIF20B94;LOC106038357;PLA2G7;MSTN
25	GO:0005125	MF	cytokine activity	25/ 2723	60/ 12028	0.416667	0.000962002	0.0637716	gene8681;gene18995;gene12288;gene2407;gene8682;gene19844;gene19845;gene20213;gene11169;gene12636;gene132;gene8984;gene11436;gene12638;gene12292;gene12290;gene12291;gene4789;gene13081;gene2646;gene923;gene11855;gene5185;gene19163;gene19162	TNFSF8;CSF1;LOC106041089;IL6;TNFSF15;LOC106049328;LOC106049327;IL1B;IL18;LOC106041492;CXCL12;CD40LG;WNT7A;LOC106041491;ATP9A2;ATP9A0;ATP9A1;ANXA79;MTHFD2L;BMP5;LOC106038263;SLC2A105;LOC106033294;LOC106048600;LOC106048595
96	GO:0048585	BP	negative regulation of response to stimulus	96/ 2723	313/ 12028	0.306709	0.000976758	0.0644429	gene4032;gene11315;gene14089;gene8127;gene8472;gene7983;gene3800;gene7810;gene18301;gene13942;gene7793;gene5733;gene14419;gene4973;gene18638;gene7661;gene11699;gene9790;gene12495;gene7516;gene12086;gene12661;gene11274;gene18524;gene12301;gene3742;gene20084;gene1007;gene10982;gene13559;gene9552;gene16286;gene16281;gene17581;gene14022;gene11205;gene12566;gene20631;gene20630;gene14856;gene8009;gene4…	TCF7L2;RNF152;GRIN3A;RGMA;CRHR2;NIM1K;ARG2;UBASH3A;PRNP;RHOV2;SIK1;SERPING1;HOMER2;PRKAA2;VPS25;ATF4;FGF9;FBLN1;PTPN22;PARPBP;LOC106040774;HSPB1;KCTD21;GPATCH3;RNF43;ATF3;COL2A1;PHLDB2;CBLN1;SPRY1;CEP5552;SAMHD1;SLA2;TNFAIP6;KANK1;LOC106039769;RAB7B;KCNIP2631;KCNIP2630;RAG16;DAB2;ADRA2A;LOC106037440;SNAI1;PPRC191;PPRC196;CLIC2;ACKR3;EGR1;DKK2;IL7R;LOC106040422;HGF;PBK;SCD81;SOCS1;LOC106039090;SEM…
37	GO:0001653	MF	peptide receptor activity	37/ 2723	99/ 12028	0.373737	0.000981681	0.0644622	gene17479;gene11094;gene11311;gene13577;gene158;gene4411;gene19223;gene4364;gene6432;gene8074;gene12997;gene8472;gene12998;gene9021;gene7491;gene6326;gene18170;gene7870;gene8354;gene13258;gene11238;gene17390;gene10735;gene6792;gene745;gene13257;gene1827;gene16692;gene9867;gene9868;gene9869;gene4315;gene268;gene13385;gene9870;gene20074;gene17531	GCGR;CALCR;MC4R;QRFPR;LOC106048153;NPY1R;LOC106048674;NPY2R;SSTR2;NPR2;CX3CR1;CRHR2;CCR4;AGTR2;P2RY8;ACKR3;LOC106047519;AGTR1;OXTR;CXCL1258;CXCR5;ACKR4;CXCR4;MC5R;BDKRB1;CXCL1257;LOC106047885;LOC106045913;XCR1;LOC106038377;LOC106038356;EDNRA;NPFFR1;SSTR4;LOC106038357;CCR7;PTH1R
9	GO:0097530	BP	granulocyte migration	9/ 2723	14/ 12028	0.642857	0.00100058	0.0647863	gene11403;gene19162;gene9522;gene17316;gene19844;gene19845;gene15442;gene12638;gene2370	KIF20B03;LOC106048595;CEP5522;EDN2;LOC106049328;LOC106049327;ANXA1;LOC106041491;ITGB2
9	GO:0002200	BP	somatic diversification of immune receptors	9/ 2723	14/ 12028	0.642857	0.00100058	0.0647863	gene4772;gene1484;gene1485;gene18685;gene1912;gene8984;gene11359;gene16286;gene14202	HPSE272;RAG2;RAG1;AICDA;EXO1;CD40LG;HSPD1;SAMHD1;MSH2
9	GO:0071621	BP	granulocyte chemotaxis	9/ 2723	14/ 12028	0.642857	0.00100058	0.0647863	gene11403;gene19162;gene9522;gene17316;gene19844;gene19845;gene15442;gene12638;gene2370	KIF20B03;LOC106048595;CEP5522;EDN2;LOC106049328;LOC106049327;ANXA1;LOC106041491;ITGB2
100	GO:0006928	BP	movement of cell or subcellular component	100/ 2723	329/ 12028	0.303951	0.00102416	0.0660059	gene11588;gene8973;gene19390;gene11197;gene11989;gene5620;gene3922;gene5782;gene19177;gene17316;gene13942;gene12638;gene11109;gene15801;gene13257;gene9522;gene1932;gene12315;gene899;gene5162;gene12816;gene15783;gene5330;gene6346;gene12723;gene2370;gene10004;gene3187;gene12661;gene2468;gene777;gene19844;gene19845;gene18037;gene16763;gene10220;gene16443;gene14022;gene11205;gene3345;gene4899;gene135…	DNAJA1;FGF13;DOCK5;DSCAML1;DAB2IP;DYX1C1;LOC106031806;KIF18A;KIF17;EDN2;RHOV2;LOC106041491;HSPA8;LOC10604815301;CXCL1257;CEP5522;KIF26B;SBDS;BOC;RLTPR;LOC106041556;COTL1;LOC1060333280;FN1;ANKRD2223;ITGB2;EXT1;PTN;HSPB1;WIPF3;CHGA;LOC106049328;LOC106049327;WDR35;ITGB3;PRKCQ;B3GNT2;KANK1;LOC106039769;IFT81;SGCD;PLA2G4F3;ANXA8L129;KIF20B;KIF21A;CHST16;ROBO4;SNAI1;KIF3C;KIF11;MYO9B;RHOF;KIF25;SDC4;RA…
35	GO:0050778	BP	positive regulation of immune response	35/ 2723	93/ 12028	0.376344	0.00107434	0.068921	gene11359;gene15810;gene2596;gene20665;gene15442;gene14202;gene3889;gene16609;gene6211;gene17608;gene20338;gene14127;gene20364;gene10682;gene3860;gene20396;gene20397;gene11570;gene15187;gene10298;gene19609;gene13257;gene16004;gene8002;gene18460;gene20308;gene12495;gene12946;gene10220;gene13348;gene17307;gene16801;gene2370;gene4907;gene9649	HSPD1;LOC10604815310;PPRC196;LOC106029527;ANXA1;MSH2;IRF7;ADORA2B;LCP2;CD79B;KCNIP2338;BCAR1;MOCS14;KLHL6;COCH;KCNIP2396;KCNIP2397;STK40;SEMA7A;EIF2B2;LOC106049106;CXCL1257;SYK;C7;NFKB260;LOC106049812;PTPN22;HMGB2;PRKCQ;CD226;THEMIS2;PRKCB;ITGB2;CYFIP2;BLK
17	GO:0009266	BP	response to temperature stimulus	17/ 2723	36/ 12028	0.472222	0.00108163	0.0690704	gene20213;gene11588;gene19882;gene15351;gene9722;gene3255;gene16594;gene19506;gene12027;gene11359;gene4724;gene17700;gene15729;gene349;gene5716;gene11109;gene8833	IL1B;DNAJA1;SLC52A3;LOC106044437;ST8SIA1;TRPV4;MARCH894;LOC106048968;HSPA5;HSPD1;NR3C1;HSP90AA1;ANXA8L129;CDK1;CPN116;HSPA8;HSPA2
24	GO:0050678	BP	regulation of epithelial cell proliferation	24/ 2723	57/ 12028	0.421053	0.00118489	0.0743008	gene3187;gene18522;gene11436;gene645;gene6749;gene15756;gene14167;gene5563;gene4032;gene17281;gene8439;gene11327;gene12773;gene4565;gene15729;gene2646;gene11699;gene16393;gene15768;gene16925;gene2591;gene8959;gene7964;gene3857	PTN;SFN;WNT7A;FGFBP1;PTPRM;ANXA8L156;CREB3L17;FGF7;TCF7L2;SCD81;WNT3A;SERPINB5;NOTCH2;TNFAIP3;ANXA8L129;BMP5;FGF9;AR;CDH13;PPARD;PPRC191;TNMD;SGPP2;PRKD1
40	GO:0032970	BP	regulation of actin filament-based process	40/ 2723	110/ 12028	0.363636	0.00119802	0.0747878	gene11987;gene15613;gene19671;gene1394;gene4209;gene12024;gene3332;gene5505;gene1007;gene13411;gene13515;gene9552;gene7326;gene12800;gene16763;gene17622;gene14022;gene5162;gene13238;gene17645;gene11205;gene13482;gene17263;gene5593;gene12773;gene4952;gene19382;gene13257;gene10811;gene3617;gene5146;gene4110;gene2925;gene6427;gene12312;gene14118;gene6149;gene13658;gene9164;gene18354	GSN;RHOB;WNT4;RHOV;LOC106032083;LOC106040731;RHOF;BAIAP2L1;PHLDB2;PTGR21;WNT11;CEP5552;SEMA3E;MYOC;ITGB3;FMNL1;KANK1;RLTPR;CXCL1238;ACTR3B;LOC106039769;KCNE3;SPIRE2;LOC106033657;NOTCH2;LOC1060339722;STC1;CXCL1257;LOC106039322;PLEKHH2;HSD11B2;ECT2;ITGB1BP1;CDC42EP4;LIMK1;LPAR1;SNX9;ARHGAP6;DSG2;LIMA1
182	GO:0098772	MF	molecular function regulator	182/ 2723	653/ 12028	0.278714	0.00126479	0.0786031	gene11984;gene8973;gene17575;gene18995;gene11989;gene10796;gene6275;gene11906;gene8116;gene6420;gene9578;gene19390;gene5780;gene6174;gene17316;gene3476;gene17406;gene13942;gene12638;gene5733;gene17468;gene17377;gene13149;gene15553;gene12254;gene2407;gene11699;gene11205;gene7598;gene11855;gene2822;gene9790;gene7519;gene16473;gene16477;gene8307;gene14442;gene12725;gene6107;gene2690;gene8681;gene318…	C5;FGF13;LYPD6B;CSF1;DAB2IP;WNT10A;ARHGEF37;APLP2;AKAP13;MSTN;CEP5578;DOCK5;BDNF;ARAP3;EDN2;SERPIND1;TBC1D9;RHOV2;LOC106041491;SERPING1;CYTH1;COL6A6;PRKAR2B;CCNL2;ARHGAP15;IL6;FGF9;LOC106039769;LOC1060337568;SLC2A105;PKIA;FBLN1;IGF1;ANGPTL4;LOC106045698;AHSA2;RCAN1;ANKRD2225;LOC106034274;ARHGEF10;TNFSF8;PTN;ARHGEF38;HSPB1;SPATA13;FGF7;LOC106049328;LOC106049327;PPP1R3B;ADAP1;IL18;TRIB2;PRKAR1B;PKI…
13	GO:0009408	BP	response to heat	13/ 2723	25/ 12028	0.52	0.00127516	0.0788953	gene5716;gene11588;gene19882;gene15351;gene3255;gene12027;gene9722;gene4724;gene17700;gene349;gene19506;gene11109;gene8833	CPN116;DNAJA1;SLC52A3;LOC106044437;TRPV4;HSPA5;ST8SIA1;NR3C1;HSP90AA1;CDK1;LOC106048968;HSPA8;HSPA2
141	GO:0050793	BP	regulation of developmental process	141/ 2723	490/ 12028	0.287755	0.00135768	0.082896	gene8973;gene18995;gene1394;gene15810;gene11350;gene10690;gene4411;gene2407;gene3922;gene9475;gene4601;gene3800;gene13942;gene645;gene16994;gene19614;gene16576;gene15068;gene4965;gene7661;gene2596;gene11699;gene899;gene12312;gene9790;gene12816;gene3818;gene5338;gene17807;gene8030;gene12946;gene9408;gene10304;gene12268;gene3187;gene12661;gene18522;gene19633;gene1007;gene10982;gene1335;gene1484;gen…	FGF13;CSF1;RHOV;LOC10604815310;HECW2;GPC1;NPY1R;IL6;LOC106031806;LOC106037948;LAMA4;ARG2;RHOV2;FGFBP1;PRDM6;PALM;MARCH876;PPAPDC3;JUN;ATF4;PPRC196;FGF9;BOC;LIMK1;FBLN1;LOC106041556;THBS1;LOC1060333288;DUSP15;IL7R;HMGB2;NCMAP;FOS;ACVR2A;PTN;HSPB1;SFN;S100A1;PHLDB2;CBLN1;LOC106040700;RAG2;ITGB3;TRIB2;CEP5522;BRINP1;KANK1;LOC106039769;RET;NOTCH2;PRKCH;PRKCB;RAB7B;PLA2G4F3;OMD;EFHC2;RARB;FLVCR1;LAMA2…
26	GO:0050839	MF	cell adhesion molecule binding	26/ 2723	64/ 12028	0.40625	0.00136619	0.0830512	gene11197;gene4796;gene9996;gene6749;gene2150;gene16763;gene5943;gene9164;gene4424;gene19621;gene15187;gene16336;gene5713;gene2415;gene2925;gene11875;gene16004;gene15768;gene3937;gene6673;gene11132;gene11130;gene11764;gene17324;gene12123;gene2370	DSCAML1;TGFBI;NOV;PTPRM;ITGB6;ITGB3;CYR61;DSG2;CPE;MADCAM1;SEMA7A;CD9;CIB2;GPNMB;ITGB1BP1;ROBO4;SYK;CDH13;ITGBL1;DSP;THY1;PVRL1;GDAP1L14;LOC106046593;CDH4;ITGB2
8	GO:0002573	BP	myeloid leukocyte differentiation	8/ 2723	12/ 12028	0.666667	0.00138904	0.0837089	gene4642;gene18995;gene17498;gene4580;gene14856;gene13257;gene1439;gene3922	OSTM1;CSF1;FASN;CITED2;RAG16;CXCL1257;LOC1060464399;LOC106031806
8	GO:0040036	BP	regulation of fibroblast growth factor receptor signaling pathway	8/ 2723	12/ 12028	0.666667	0.00138904	0.0837089	gene19671;gene2864;gene1192;gene645;gene12509;gene8439;gene7975;gene13559	WNT4;SULF1;SULF2;FGFBP1;WNT2B;WNT3A;FGF10;SPRY1
21	GO:0002521	BP	leukocyte differentiation	21/ 2723	48/ 12028	0.4375	0.00140982	0.0845951	gene14139;gene4693;gene17498;gene14367;gene1484;gene1485;gene18995;gene7614;gene14856;gene2532;gene15751;gene12495;gene13257;gene15442;gene8030;gene4642;gene4580;gene1439;gene14202;gene3922;gene8984	CBFB;EGR1;FASN;LOC10604643967;RAG2;RAG1;CSF1;MFNG;RAG16;PPRC132;BCL6;PTPN22;CXCL1257;ANXA1;IL7R;OSTM1;CITED2;LOC1060464399;MSH2;LOC106031806;CD40LG
291	GO:0048519	BP	negative regulation of biological process	291/ 2723	1096/ 12028	0.265511	0.0014596	0.0872061	gene11987;gene15613;gene11359;gene8973;gene14361;gene17191;gene3842;gene17471;gene17581;gene11350;gene13398;gene10690;gene4965;gene2407;gene2078;gene4361;gene13515;gene4367;gene14089;gene9085;gene12509;gene1335;gene11901;gene9475;gene2480;gene2731;gene15768;gene8472;gene7316;gene3800;gene9552;gene19150;gene9571;gene5943;gene2822;gene7810;gene13238;gene18302;gene16539;gene18301;gene3476;gene13942;…	GSN;RHOB;HSPD1;FGF13;TRIM71;UPF3A;ACTC1;SOCS3;TNFAIP6;HECW2;BUB1;GPC1;JUN;IL6;KCNIP278;RBM46;WNT11;GUCY1A3;GRIN3A;ASNS;WNT2B;LOC106040700;BARX2;LOC106037948;DPH3;GEM;CDH13;CRHR2;GNAI1;ARG2;CEP5552;TTK;ABHD6;CYR61;PKIA;UBASH3A;CXCL1238;PROM2;MARCH839;PRNP;SERPIND1;RHOV2;TFCP2L1;HSPA8;SERPING1;XIAP;MARCH876;HOMER2;PRKAA2;ARHGAP1999;BRINP1;PPAPDC3;CXCL1257;DSCAM;PLEKHH2;MECOM;CDK1;FGF9;BHLHE40;LIMK1…
129	GO:0048584	BP	positive regulation of response to stimulus	129/ 2723	445/ 12028	0.289888	0.00147463	0.0877276	gene11359;gene15810;gene645;gene2407;gene20665;gene4367;gene2836;gene3889;gene3800;gene17316;gene12638;gene20396;gene20397;gene20823;gene13257;gene11989;gene11699;gene11855;gene7519;gene7215;gene20308;gene17807;gene2864;gene12495;gene19641;gene12946;gene9870;gene9713;gene9649;gene12268;gene3187;gene12661;gene12773;gene3742;gene11687;gene16609;gene6211;gene3922;gene7829;gene4032;gene14022;gene3860…	HSPD1;LOC10604815310;FGFBP1;IL6;LOC106029527;GUCY1A3;LY96;IRF7;ARG2;EDN2;LOC106041491;KCNIP2396;KCNIP2397;LOC106029694;CXCL1257;DAB2IP;FGF9;SLC2A105;IGF1;ACOX2;LOC106049812;DUSP15;SULF1;PTPN22;LOC106049124;HMGB2;LOC106038357;PLA2G7;BLK;ACVR2A;PTN;HSPB1;NOTCH2;ATF3;PKIG7;ADORA2B;LCP2;LOC106031806;DSCAM;TCF7L2;KANK1;COCH;LOC106039769;FGF10;ENPP4;AKAP12;STK40;ANXA8L129;FABP5;C7;ADRA2A;HGF;XIAP;CITED…
16	GO:0002685	BP	regulation of leukocyte migration	16/ 2723	34/ 12028	0.470588	0.00160701	0.0951966	gene7610;gene3187;gene16763;gene9713;gene3255;gene16336;gene12495;gene13257;gene9869;gene17316;gene11494;gene19621;gene15442;gene9870;gene6420;gene4789	RAC2;PTN;ITGB3;PLA2G7;TRPV4;CD9;PTPN22;CXCL1257;LOC106038356;EDN2;KIF20B94;MADCAM1;ANXA1;LOC106038357;MSTN;ANXA79
297	GO:0050896	BP	response to stimulus	297/ 2723	1123/ 12028	0.26447	0.00164656	0.0967165	gene15613;gene11588;gene8973;gene20548;gene11583;gene15810;gene3279;gene4965;gene2407;gene11359;gene4367;gene14089;gene9085;gene2836;gene3889;gene12290;gene12767;gene15274;gene8472;gene4855;gene18014;gene9552;gene9570;gene12636;gene20778;gene1504;gene9675;gene18301;gene1662;gene12638;gene7793;gene11109;gene20396;gene20397;gene5965;gene17801;gene4973;gene6683;gene12791;gene13257;gene16801;gene2105…	RHOB;DNAJA1;FGF13;LOC106029404;XPA;LOC10604815310;FICD;JUN;IL6;HSPD1;GUCY1A3;GRIN3A;ASNS;LY96;IRF7;ATP9A0;CRIP1;SLC2A5;CRHR2;CD74;FANCC;CEP5552;CEP5570;LOC106041492;KCNIP2778;CAT;MCM3;PRNP;SYT1;LOC106041491;SIK1;HSPA8;KCNIP2396;KCNIP2397;LRRC8D;LOC106047112;PRKAA2;F13A1;ANKRD2291;CXCL1257;PRKCB;ADCY5;ATF4;PIDD1;SAMHD1;DNMBP39;BHLHE40;NFKB276;NR3C1;THBS1;FBLN1;IGF1;HNF4A3;LOC106049812;COTL1;EEPD1;…
34	GO:0098542	BP	defense response to other organism	34/ 2723	92/ 12028	0.369565	0.00166771	0.0974756	gene20548;gene777;gene3700;gene2407;gene7438;gene2836;gene3889;gene4347;gene1484;gene17830;gene13927;gene20778;gene9727;gene13649;gene3860;gene19767;gene19641;gene10561;gene17686;gene11570;gene20823;gene19609;gene13257;gene1716;gene16286;gene18685;gene19459;gene20308;gene15783;gene2596;gene12946;gene14957;gene3857;gene14856	LOC106029404;CHGA;TLR5;IL6;LOC106035746;LY96;IRF7;LOC106032265;RAG2;LOC106047130;LOC106042804;KCNIP2778;KCNJ8;TLR7;COCH;IRF8;LOC106049124;LOC106039090;TRAF3;STK40;LOC106029694;LOC106049106;CXCL1257;LYZ;SAMHD1;AICDA;IRF5;LOC106049812;COTL1;PPRC196;HMGB2;JCHAIN;PRKD1;RAG16
11	GO:0051492	BP	regulation of stress fiber assembly	11/ 2723	20/ 12028	0.55	0.00167349	0.0974756	gene9552;gene12800;gene19671;gene14118;gene5146;gene13658;gene2925;gene11205;gene1007;gene12312;gene13515	CEP5552;MYOC;WNT4;LPAR1;HSD11B2;ARHGAP6;ITGB1BP1;LOC106039769;PHLDB2;LIMK1;WNT11
23	GO:0062023	CC	collagen-containing extracellular matrix	23/ 2723	55/ 12028	0.418182	0.00172418	0.10001	gene10690;gene10693;gene15757;gene20084;gene9004;gene4830;gene18301;gene3860;gene3981;gene7975;gene8680;gene17118;gene19704;gene19706;gene11912;gene15518;gene9790;gene1558;gene16636;gene8538;gene15122;gene5330;gene6346	GPC1;LOC106039183;ANXA8L157;COL2A1;GPC4;ADAMTS2;PRNP;COCH;COL17A1;FGF10;TNC;GPC5;OMD;ECM2;ADAMTS8;SMOC2;FBLN1;MGP;PRELP;LUM;LOC106044084;LOC1060333280;FN1
78	GO:0009968	BP	negative regulation of signal transduction	78/ 2723	251/ 12028	0.310757	0.00173749	0.100364	gene10720;gene4693;gene2646;gene16220;gene19671;gene8009;gene12661;gene11494;gene11274;gene18524;gene8200;gene12301;gene12027;gene3742;gene15756;gene4565;gene2925;gene20084;gene11784;gene10982;gene13515;gene9552;gene19689;gene6420;gene16286;gene16281;gene7321;gene15351;gene13189;gene4032;gene14022;gene20022;gene7810;gene17281;gene20213;gene18301;gene12442;gene13559;gene7793;gene10561;gene12858;ge…	OPA1;EGR1;BMP5;DKK2;WNT4;DAB2;HSPB1;KIF20B94;KCTD21;GPATCH3;GRB10;RNF43;HSPA5;ATF3;ANXA8L156;TNFAIP3;ITGB1BP1;COL2A1;LOC106040422;CBLN1;WNT11;CEP5552;SARM1;MSTN;SAMHD1;SLA2;HGF;LOC106044437;LOC106042065;TCF7L2;KANK1;PBK;UBASH3A;SCD81;IL1B;PRNP;SOCS1;SPRY1;SIK1;LOC106039090;IL1R2;DEPTOR;ARHGAP1989;RAB7B;HOMER2;PRKAA2;KCNIP2630;VPS25;CXCL1257;ARHGAP42;MECOM;TRABD2B;FGF9;LOC106039769;AR;KNDC162;SIAH…
7	GO:0035025	BP	positive regulation of Rho protein signal transduction	7/ 2723	10/ 12028	0.7	0.00188293	0.104678	gene13258;gene14055;gene14052;gene14053;gene14118;gene13257;gene11205	CXCL1258;GPR174;LPAR4;LOC106042993;LPAR1;CXCL1257;LOC106039769
12	GO:0110020	BP	regulation of actomyosin structure organization	12/ 2723	23/ 12028	0.521739	0.00188738	0.104678	gene9552;gene12800;gene19671;gene14118;gene13658;gene5146;gene4110;gene2925;gene11205;gene1007;gene12312;gene13515	CEP5552;MYOC;WNT4;LPAR1;ARHGAP6;HSD11B2;ECT2;ITGB1BP1;LOC106039769;PHLDB2;LIMK1;WNT11
12	GO:0002700	BP	regulation of production of molecular mediator of immune response	12/ 2723	23/ 12028	0.521739	0.00188738	0.104678	gene15187;gene20631;gene20630;gene13348;gene2596;gene2407;gene12495;gene8984;gene15751;gene13257;gene11205;gene14202	SEMA7A;KCNIP2631;KCNIP2630;CD226;PPRC196;IL6;PTPN22;CD40LG;BCL6;CXCL1257;LOC106039769;MSH2
35	GO:0008528	MF	G protein-coupled peptide receptor activity	35/ 2723	95/ 12028	0.368421	0.00185673	0.104678	gene17479;gene11094;gene11311;gene13577;gene158;gene4411;gene19223;gene4364;gene6432;gene12997;gene12998;gene9021;gene7491;gene6326;gene18170;gene7870;gene8354;gene13258;gene11238;gene17390;gene10735;gene6792;gene745;gene13257;gene1827;gene16692;gene9867;gene9868;gene9869;gene4315;gene268;gene13385;gene9870;gene20074;gene17531	GCGR;CALCR;MC4R;QRFPR;LOC106048153;NPY1R;LOC106048674;NPY2R;SSTR2;CX3CR1;CCR4;AGTR2;P2RY8;ACKR3;LOC106047519;AGTR1;OXTR;CXCL1258;CXCR5;ACKR4;CXCR4;MC5R;BDKRB1;CXCL1257;LOC106047885;LOC106045913;XCR1;LOC106038377;LOC106038356;EDNRA;NPFFR1;SSTR4;LOC106038357;CCR7;PTH1R
7	GO:0017017	MF	MAP kinase tyrosine/serine/threonine phosphatase activity	7/ 2723	10/ 12028	0.7	0.00188293	0.104678	gene3709;gene4014;gene3052;gene16861;gene13882;gene13729;gene13852	DUSP10;DUSP5;ARHGAP1952;DUSP4;ERCC682;DUSP8;DUSP1
7	GO:0033549	MF	MAP kinase phosphatase activity	7/ 2723	10/ 12028	0.7	0.00188293	0.104678	gene3709;gene4014;gene3052;gene16861;gene13882;gene13729;gene13852	DUSP10;DUSP5;ARHGAP1952;DUSP4;ERCC682;DUSP8;DUSP1
126	GO:0005509	MF	calcium ion binding	126/ 2723	435/ 12028	0.289655	0.00193547	0.10692	gene11987;gene20542;gene18385;gene10590;gene19308;gene12631;gene257;gene9162;gene1662;gene18555;gene2220;gene15065;gene16574;gene7597;gene12317;gene13549;gene19080;gene19081;gene9790;gene3818;gene10183;gene20156;gene2864;gene13386;gene12123;gene19639;gene6860;gene19633;gene19635;gene19634;gene5814;gene5153;gene12773;gene4870;gene13809;gene7475;gene15313;gene13393;gene9024;gene20006;gene8096;gene1…	GSN;PRF1;EDEM2;PPP2R3A;DAG1;PSPH;PPRC17;LOC106037565;SYT1;COMP;SLC25A12;AIF1L;MARCH874;LOC1060337567;CALN1;FAT4;LOC10602987880;LOC10602987881;FBLN1;THBS1;LOC106038708;LOC106049646;SULF1;THBD;CDH4;LOC106049125;LCP1;S100A1;S100A16;LOC106049115;AFAP14;TPPP3;NOTCH2;FAT2;VCAN;LOC106035673;EPDR1;FBLN7;PLS3;LOC106049502;MFGE8;CRACR2A;CAPN2;LOC106049127;LOC106049124;STK40;UNC13C;LOC106049466;PCBD14;CBLB;…
37	GO:2000147	BP	positive regulation of cell motility	37/ 2723	103/ 12028	0.359223	0.00199	0.109066	gene15613;gene18627;gene3187;gene12661;gene11436;gene3255;gene645;gene15768;gene15442;gene4262;gene13515;gene12800;gene16763;gene7321;gene5563;gene8059;gene14127;gene17316;gene13942;gene5943;gene13258;gene15187;gene4789;gene19621;gene421;gene13257;gene9869;gene7610;gene2925;gene5162;gene6420;gene4021;gene1209;gene2415;gene11109;gene9870;gene9713	RHOB;PTRF;PTN;HSPB1;WNT7A;TRPV4;FGFBP1;CDH13;ANXA1;C1QTNF8;WNT11;MYOC;ITGB3;HGF;FGF7;ARHGEF39;BCAR1;EDN2;RHOV2;CYR61;CXCL1258;SEMA7A;ANXA79;MADCAM1;RET;CXCL1257;LOC106038356;RAC2;ITGB1BP1;RLTPR;MSTN;ADRA2A;SNAI1;GPNMB;HSPA8;LOC106038357;PLA2G7
9	GO:0002822	BP	regulation of adaptive immune response based on somatic recombination of immune receptors built from immunoglobulin superfamily domains	9/ 2723	15/ 12028	0.6	0.00199995	0.109181	gene11359;gene15810;gene13348;gene10220;gene8030;gene15751;gene4565;gene15442;gene14202	HSPD1;LOC10604815310;CD226;PRKCQ;IL7R;BCL6;TNFAIP3;ANXA1;MSH2
64	GO:0030545	MF	receptor regulator activity	64/ 2723	200/ 12028	0.32	0.00208566	0.112536	gene8681;gene3187;gene17575;gene18995;gene12288;gene4789;gene9996;gene16525;gene2407;gene10796;gene2158;gene5563;gene19844;gene19845;gene8973;gene19671;gene8682;gene13515;gene20213;gene11169;gene7321;gene1270;gene18243;gene12195;gene12636;gene132;gene17316;gene11436;gene13967;gene564;gene7975;gene12638;gene12292;gene18985;gene12290;gene12291;gene15187;gene19163;gene19382;gene13318;gene13562;gene1…	TNFSF8;PTN;LYPD6B;CSF1;LOC106041089;ANXA79;NOV;MARCH825;IL6;WNT10A;GCG;FGF7;LOC106049328;LOC106049327;FGF13;WNT4;TNFSF15;WNT11;IL1B;IL18;HGF;ANKRD220;FGF12;LOC106040927;LOC106041492;CXCL12;EDN2;WNT7A;INHBA;DNMBP4;FGF10;LOC106041491;ATP9A2;NRTN;ATP9A0;ATP9A1;SEMA7A;LOC106048600;STC1;LOC106042178;PLA2G4F2;LOC106048595;MTHFD2L;NPPC;GPNMB;LOC106038263;FGF9;LOC106039769;SLC2A105;GHRH;MSTN;IGF1;RHOV2;B…
14	GO:0002224	BP	toll-like receptor signaling pathway	14/ 2723	28/ 12028	0.5	0.00211899	0.113893	gene20213;gene17686;gene11359;gene20548;gene20823;gene3700;gene8347;gene16111;gene11888;gene13649;gene2836;gene3889;gene4347;gene10561	IL1B;TRAF3;HSPD1;LOC106029404;LOC106029694;TLR5;IRAK2;RAB11FIP2;TIRAP;TLR7;LY96;IRF7;LOC106032265;LOC106039090
56	GO:0030334	BP	regulation of cell migration	56/ 2723	170/ 12028	0.329412	0.00217973	0.116708	gene3922;gene15613;gene15988;gene3187;gene12661;gene11436;gene3255;gene2925;gene645;gene15768;gene9571;gene13699;gene3332;gene6749;gene15442;gene19671;gene1007;gene13515;gene11132;gene12800;gene16763;gene7321;gene5563;gene8059;gene14022;gene17316;gene17281;gene13942;gene5943;gene13258;gene16336;gene15187;gene4789;gene18649;gene19382;gene5716;gene19621;gene421;gene13257;gene9869;gene7610;gene17324…	LOC106031806;RHOB;LOC106045044;PTN;HSPB1;WNT7A;TRPV4;ITGB1BP1;FGFBP1;CDH13;ABHD6;PHLDA2;RHOF;PTPRM;ANXA1;WNT4;PHLDB2;WNT11;THY1;MYOC;ITGB3;HGF;FGF7;ARHGEF39;KANK1;EDN2;SCD81;RHOV2;CYR61;CXCL1258;CD9;SEMA7A;ANXA79;PRCP;STC1;CPN116;MADCAM1;RET;CXCL1257;LOC106038356;RAC2;LOC106046593;LAMA4;RLTPR;LAMA2;MSTN;ADRA2A;BCAR1;DCN;SNAI1;PTPN22;F54;GPNMB;KIF20B94;LOC106038357;PLA2G7
38	GO:0040017	BP	positive regulation of locomotion	38/ 2723	106/ 12028	0.358491	0.00220295	0.117499	gene15613;gene18627;gene3187;gene12661;gene11436;gene3255;gene645;gene15768;gene15442;gene4262;gene13515;gene12800;gene16763;gene7321;gene5563;gene8059;gene14127;gene17316;gene13942;gene5943;gene13258;gene15187;gene4789;gene19621;gene421;gene13257;gene9869;gene7610;gene2925;gene5162;gene6420;gene4021;gene1209;gene7829;gene2415;gene11109;gene9870;gene9713	RHOB;PTRF;PTN;HSPB1;WNT7A;TRPV4;FGFBP1;CDH13;ANXA1;C1QTNF8;WNT11;MYOC;ITGB3;HGF;FGF7;ARHGEF39;BCAR1;EDN2;RHOV2;CYR61;CXCL1258;SEMA7A;ANXA79;MADCAM1;RET;CXCL1257;LOC106038356;RAC2;ITGB1BP1;RLTPR;MSTN;ADRA2A;SNAI1;DSCAM;GPNMB;HSPA8;LOC106038357;PLA2G7
6	GO:0014857	BP	regulation of skeletal muscle cell proliferation	6/ 2723	8/ 12028	0.75	0.00244299	0.128821	gene16925;gene19671;gene7321;gene10690;gene12205;gene6420	PPARD;WNT4;HGF;GPC1;SDC4;MSTN
6	GO:0030888	BP	regulation of B cell proliferation	6/ 2723	8/ 12028	0.75	0.00244299	0.128821	gene6988;gene20631;gene15810;gene15751;gene20630;gene3922	CASP3;KCNIP2631;LOC10604815310;BCL6;KCNIP2630;LOC106031806
4	GO:0010829	BP	negative regulation of glucose transmembrane transport	4/ 2723	4/ 12028	1	0.00262226	0.133716	gene2804;gene8200;gene16801;gene6965	FABP5;GRB10;PRKCB;MTNR1A
4	GO:0043589	BP	skin morphogenesis	4/ 2723	4/ 12028	1	0.00262226	0.133716	gene17926;gene17925;gene15756;gene13515	SLC38A26;SLC38A25;ANXA8L156;WNT11
4	GO:0032733	BP	positive regulation of interleukin-10 production	4/ 2723	4/ 12028	1	0.00262226	0.133716	gene14856;gene8984;gene11359;gene7321	RAG16;CD40LG;HSPD1;HGF
4	GO:0006656	BP	phosphatidylcholine biosynthetic process	4/ 2723	4/ 12028	1	0.00262226	0.133716	gene16891;gene4234;gene11205;gene2804	CEPT1;TMEM2544;LOC106039769;FABP5
4	GO:0060638	BP	mesenchymal-epithelial cell signaling	4/ 2723	4/ 12028	1	0.00262226	0.133716	gene5563;gene7975;gene7321;gene12509	FGF7;FGF10;HGF;WNT2B
4	GO:0035173	MF	histone kinase activity	4/ 2723	4/ 12028	1	0.00262226	0.133716	gene4973;gene349;gene11883;gene16801	PRKAA2;CDK1;CHEK1;PRKCB
4	GO:0071813	MF	lipoprotein particle binding	4/ 2723	4/ 12028	1	0.00262226	0.133716	gene11205;gene11359;gene20308;gene15768	LOC106039769;HSPD1;LOC106049812;CDH13
4	GO:0071814	MF	protein-lipid complex binding	4/ 2723	4/ 12028	1	0.00262226	0.133716	gene11205;gene11359;gene20308;gene15768	LOC106039769;HSPD1;LOC106049812;CDH13
4	GO:0030506	MF	ankyrin binding	4/ 2723	4/ 12028	1	0.00262226	0.133716	gene17324;gene19456;gene16418;gene13411	LOC106046593;FLNC;SLC8A1;PTGR21
30	GO:0110053	BP	regulation of actin filament organization	30/ 2723	79/ 12028	0.379747	0.00263841	0.134049	gene11987;gene19671;gene4209;gene12024;gene5505;gene1007;gene13411;gene13515;gene9552;gene12800;gene17622;gene14022;gene5162;gene13238;gene17645;gene11205;gene17263;gene5593;gene4952;gene13257;gene10811;gene3617;gene5146;gene2925;gene6427;gene12312;gene14118;gene18354;gene13658;gene6149	GSN;WNT4;LOC106032083;LOC106040731;BAIAP2L1;PHLDB2;PTGR21;WNT11;CEP5552;MYOC;FMNL1;KANK1;RLTPR;CXCL1238;ACTR3B;LOC106039769;SPIRE2;LOC106033657;LOC1060339722;CXCL1257;LOC106039322;PLEKHH2;HSD11B2;ITGB1BP1;CDC42EP4;LIMK1;LPAR1;LIMA1;ARHGAP6;SNX9
14	GO:0071103	BP	DNA conformation change	14/ 2723	29/ 12028	0.482759	0.00268077	0.134725	gene13310;gene7626;gene18285;gene658;gene18493;gene14526;gene9605;gene12946;gene19763;gene9911;gene17737;gene20078;gene15442;gene88	TOP1MT;LOC106035790;NCAPH;NCAPG;NFKB293;TOP1;MCM2;HMGB2;GINS2;MCM4;RAD51;TOP2A;ANXA1;HHEX
14	GO:0002221	BP	pattern recognition receptor signaling pathway	14/ 2723	29/ 12028	0.482759	0.00268077	0.134725	gene20213;gene17686;gene11359;gene20548;gene20823;gene3700;gene8347;gene16111;gene11888;gene13649;gene2836;gene3889;gene4347;gene10561	IL1B;TRAF3;HSPD1;LOC106029404;LOC106029694;TLR5;IRAK2;RAB11FIP2;TIRAP;TLR7;LY96;IRF7;LOC106032265;LOC106039090
34	GO:0002791	BP	regulation of peptide secretion	34/ 2723	94/ 12028	0.361702	0.00276814	0.136228	gene3255;gene777;gene3700;gene2407;gene15442;gene4347;gene2975;gene13411;gene2480;gene11169;gene3800;gene20823;gene4032;gene8984;gene4565;gene11205;gene10561;gene13258;gene12651;gene16574;gene20631;gene20630;gene15729;gene13257;gene2105;gene12195;gene11870;gene4021;gene7519;gene1172;gene12858;gene12495;gene10654;gene9649	TRPV4;CHGA;TLR5;IL6;ANXA1;LOC106032265;VSNL1;PTGR21;DPH3;IL18;ARG2;LOC106029694;TCF7L2;CD40LG;TNFAIP3;LOC106039769;LOC106039090;CXCL1258;RASL10B;MARCH874;KCNIP2631;KCNIP2630;ANXA8L129;CXCL1257;ADCY5;LOC106040927;EYA20;ADRA2A;IGF1;HNF4A;IL1R2;PTPN22;PASK;BLK
77	GO:0007010	BP	cytoskeleton organization	77/ 2723	250/ 12028	0.308	0.00279363	0.136228	gene3275;gene4555;gene15613;gene20236;gene8973;gene10631;gene10048;gene2468;gene18427;gene13451;gene2640;gene5153;gene3332;gene15751;gene16684;gene9772;gene15442;gene13513;gene19193;gene11968;gene13411;gene13559;gene9552;gene8478;gene1007;gene4323;gene15055;gene14267;gene6218;gene6723;gene9570;gene14022;gene12580;gene3805;gene1394;gene13006;gene8589;gene17078;gene7610;gene2690;gene7975;gene3842;g…	CORO1C;MAP7;RHOB;KCNIP2236;FGF13;CEP19;CAPN6;WIPF3;NFKB227;EPB41L4A;DST;TPPP3;RHOF;BCL6;NAV34;PARVB;ANXA1;UVRAG;MAP1A;LOC106040650;PTGR21;SPRY1;CEP5552;VILL;PHLDB2;DCLK2;FRMD6;LOC106043193;LOC10603787018;NDC80;CEP5570;KANK1;NUAK2;PLEK2;RHOV;TPPP;GAS2L3;PPL;RAC2;ARHGEF10;FGF10;ACTC1;ERCC667;LOC106048011;KLHL41;CNTNAP1;LOC10604815347;TNFAIP3;NEFM;LOC106039004;KIF18A;PSTPIP2;NUSAP1;NEK2;KNSTRN;RHOG;…
11	GO:1901568	BP	fatty acid derivative metabolic process	11/ 2723	21/ 12028	0.52381	0.0028005	0.136228	gene7393;gene18932;gene1341;gene19151;gene2647;gene4837;gene17316;gene5990;gene12380;gene5871;gene4834	ELOVL7;HSD17B4;PTGR2;ELOVL4;HMGCLL1;LOC106032815;EDN2;PTGS2;ALOX5AP;ELOVL1;LOC106032894
11	GO:0022408	BP	negative regulation of cell-cell adhesion	11/ 2723	21/ 12028	0.52381	0.0028005	0.136228	gene6988;gene14139;gene3255;gene16336;gene12495;gene2415;gene18301;gene15442;gene11205;gene3800;gene17324	CASP3;CBFB;TRPV4;CD9;PTPN22;GPNMB;PRNP;ANXA1;LOC106039769;ARG2;LOC106046593
11	GO:0060070	BP	canonical Wnt signaling pathway	11/ 2723	21/ 12028	0.52381	0.0028005	0.136228	gene4772;gene19671;gene11436;gene10796;gene4032;gene12509;gene10230;gene11073;gene8439;gene1074;gene13515	HPSE272;WNT4;WNT7A;WNT10A;TCF7L2;WNT2B;GATA3;FZD1;WNT3A;BCL9;WNT11
32	GO:0002252	BP	immune effector process	32/ 2723	87/ 12028	0.367816	0.00281842	0.136228	gene20665;gene13927;gene777;gene2407;gene11359;gene14202;gene3922;gene3889;gene6216;gene7614;gene20338;gene9572;gene8984;gene9727;gene13649;gene20396;gene20397;gene11570;gene1912;gene19609;gene2532;gene13257;gene16286;gene8002;gene19459;gene20308;gene18685;gene15351;gene2596;gene12706;gene18460;gene4907	LOC106029527;LOC106042804;CHGA;IL6;HSPD1;MSH2;LOC106031806;IRF7;DOCK2;MFNG;KCNIP2338;DNASE1L3;CD40LG;KCNJ8;TLR7;KCNIP2396;KCNIP2397;STK40;EXO1;LOC106049106;PPRC132;CXCL1257;SAMHD1;C7;IRF5;LOC106049812;AICDA;LOC106044437;PPRC196;ANKRD2206;NFKB260;CYFIP2
5	GO:0007257	BP	activation of JUN kinase activity	5/ 2723	6/ 12028	0.833333	0.00288759	0.136228	gene8984;gene16004;gene11855;gene138;gene11989	CD40LG;SYK;SLC2A105;ERCC6;DAB2IP
8	GO:0046579	BP	positive regulation of Ras protein signal transduction	8/ 2723	13/ 12028	0.615385	0.00289583	0.136228	gene13258;gene12773;gene14055;gene14052;gene14053;gene14118;gene13257;gene11205	CXCL1258;NOTCH2;GPR174;LPAR4;LOC106042993;LPAR1;CXCL1257;LOC106039769
8	GO:0014066	BP	regulation of phosphatidylinositol 3-kinase signaling	8/ 2723	13/ 12028	0.615385	0.00289583	0.136228	gene16925;gene6562;gene7321;gene8539;gene13258;gene13257;gene16250;gene95	PPARD;KNDC162;HGF;DCN;CXCL1258;CXCL1257;NTRK2;CEP55
8	GO:0002562	BP	somatic diversification of immune receptors via germline recombination within a single locus	8/ 2723	13/ 12028	0.615385	0.00289583	0.136228	gene11359;gene1484;gene1485;gene18685;gene1912;gene8984;gene4772;gene14202	HSPD1;RAG2;RAG1;AICDA;EXO1;CD40LG;HPSE272;MSH2
8	GO:0016444	BP	somatic cell DNA recombination	8/ 2723	13/ 12028	0.615385	0.00289583	0.136228	gene11359;gene1484;gene1485;gene18685;gene1912;gene8984;gene4772;gene14202	HSPD1;RAG2;RAG1;AICDA;EXO1;CD40LG;HPSE272;MSH2
5	GO:0032809	CC	neuronal cell body membrane	5/ 2723	6/ 12028	0.833333	0.00288759	0.136228	gene20631;gene20630;gene13482;gene19011;gene19258	KCNIP2631;KCNIP2630;KCNE3;LOC10602987811;SLC4A8
11	GO:0030215	MF	semaphorin receptor binding	11/ 2723	21/ 12028	0.52381	0.0028005	0.136228	gene7326;gene13928;gene15187;gene15999;gene5579;gene19492;gene19208;gene7329;gene7319;gene13942;gene3951	SEMA3E;LOC106042805;SEMA7A;SEMA4D;SEMA6D;SEMA4A;SEMA4B;SEMA3D;SEMA3C;RHOV2;LOC106031921
5	GO:0005080	MF	protein kinase C binding	5/ 2723	6/ 12028	0.833333	0.00288759	0.136228	gene11340;gene16801;gene12661;gene11888;gene16763	SDPR;PRKCB;HSPB1;TIRAP;ITGB3
20	GO:0002696	BP	positive regulation of leukocyte activation	20/ 2723	48/ 12028	0.416667	0.0029662	0.13845	gene16609;gene14139;gene11359;gene11169;gene1485;gene15810;gene15751;gene10230;gene2407;gene12495;gene8984;gene10220;gene8030;gene13348;gene13257;gene15442;gene14202;gene3922;gene2315;gene2370	ADORA2B;CBFB;HSPD1;IL18;RAG1;LOC10604815310;BCL6;GATA3;IL6;PTPN22;CD40LG;PRKCQ;IL7R;CD226;CXCL1257;ANXA1;MSH2;LOC106031806;LOC106030066;ITGB2
37	GO:0032956	BP	regulation of actin cytoskeleton organization	37/ 2723	104/ 12028	0.355769	0.00297367	0.13845	gene11987;gene15613;gene19671;gene1394;gene4209;gene12024;gene3332;gene5505;gene1007;gene13411;gene13515;gene9552;gene7326;gene12800;gene16763;gene17622;gene14022;gene5162;gene13238;gene17645;gene11205;gene17263;gene5593;gene12773;gene4952;gene13257;gene10811;gene3617;gene5146;gene4110;gene2925;gene6427;gene12312;gene14118;gene6149;gene13658;gene18354	GSN;RHOB;WNT4;RHOV;LOC106032083;LOC106040731;RHOF;BAIAP2L1;PHLDB2;PTGR21;WNT11;CEP5552;SEMA3E;MYOC;ITGB3;FMNL1;KANK1;RLTPR;CXCL1238;ACTR3B;LOC106039769;SPIRE2;LOC106033657;NOTCH2;LOC1060339722;CXCL1257;LOC106039322;PLEKHH2;HSD11B2;ECT2;ITGB1BP1;CDC42EP4;LIMK1;LPAR1;SNX9;ARHGAP6;LIMA1
20	GO:0098552	CC	side of membrane	20/ 2723	48/ 12028	0.416667	0.0029662	0.13845	gene17686;gene7378;gene15187;gene16763;gene4053;gene16336;gene17923;gene12495;gene2731;gene9522;gene8030;gene13348;gene19161;gene16816;gene3669;gene17853;gene17324;gene5370;gene15768;gene8984	TRAF3;IL31RA;SEMA7A;ITGB3;GFRA1;CD9;SLC38A23;PTPN22;GEM;CEP5522;IL7R;CD226;IL11RA;LOC1060466736;TRAF5;CD40;LOC106046593;CDIP1;CDH13;CD40LG
47	GO:0008284	BP	positive regulation of cell population proliferation	47/ 2723	141/ 12028	0.333333	0.00323555	0.147679	gene3187;gene15810;gene10690;gene645;gene2407;gene8030;gene15751;gene15756;gene15442;gene19671;gene3922;gene14167;gene7610;gene11169;gene16763;gene7321;gene10220;gene5563;gene4032;gene8984;gene15359;gene9948;gene17316;gene9722;gene8439;gene5943;gene11436;gene12773;gene4828;gene4565;gene15729;gene16499;gene2646;gene16250;gene11699;gene2925;gene16393;gene12195;gene15768;gene16925;gene14279;gene1249…	PTN;LOC10604815310;GPC1;FGFBP1;IL6;IL7R;BCL6;ANXA8L156;ANXA1;WNT4;LOC106031806;CREB3L17;RAC2;IL18;ITGB3;HGF;PRKCQ;FGF7;TCF7L2;CD40LG;FGFR1;MYC;EDN2;ST8SIA1;WNT3A;CYR61;WNT7A;NOTCH2;CNOT6;TNFAIP3;ANXA8L129;FZR1;BMP5;NTRK2;FGF9;ITGB1BP1;AR;LOC106040927;CDH13;PPARD;MAB21L1;PTPN22;FGFR4;IL11RA;FGFR3;TIPIN;PTH1R
22	GO:0003013	BP	circulatory system process	22/ 2723	55/ 12028	0.4	0.00343959	0.155969	gene4899;gene3255;gene6749;gene7410;gene5173;gene9430;gene9021;gene18170;gene17316;gene7870;gene11550;gene3842;gene13258;gene913;gene4930;gene11403;gene15729;gene13257;gene2925;gene4021;gene4315;gene6023	SGCD;TRPV4;PTPRM;HTR1A;E2F4;MFSD2A;AGTR2;LOC106047519;EDN2;AGTR1;NPPC;ACTC1;CXCL1258;F5;HRH2;KIF20B03;ANXA8L129;CXCL1257;ITGB1BP1;ADRA2A;EDNRA;ARHGAP42
22	GO:0002253	BP	activation of immune response	22/ 2723	55/ 12028	0.4	0.00343959	0.155969	gene20665;gene2596;gene6211;gene17608;gene20338;gene14127;gene10682;gene20396;gene20397;gene11570;gene10298;gene19609;gene16004;gene8002;gene20308;gene12495;gene20364;gene17307;gene16801;gene18460;gene4907;gene9649	LOC106029527;PPRC196;LCP2;CD79B;KCNIP2338;BCAR1;KLHL6;KCNIP2396;KCNIP2397;STK40;EIF2B2;LOC106049106;SYK;C7;LOC106049812;PTPN22;MOCS14;THEMIS2;PRKCB;NFKB260;CYFIP2;BLK
14	GO:0042742	BP	defense response to bacterium	14/ 2723	30/ 12028	0.466667	0.00357625	0.160597	gene1484;gene1716;gene18685;gene20548;gene17830;gene777;gene3700;gene12946;gene20778;gene3857;gene7438;gene3860;gene14957;gene19767	RAG2;LYZ;AICDA;LOC106029404;LOC106047130;CHGA;TLR5;HMGB2;KCNIP2778;PRKD1;LOC106035746;COCH;JCHAIN;IRF8
14	GO:0009897	CC	external side of plasma membrane	14/ 2723	30/ 12028	0.466667	0.00357625	0.160597	gene7378;gene15187;gene16763;gene4053;gene16336;gene17923;gene8984;gene16816;gene9522;gene8030;gene13348;gene19161;gene17853;gene15768	IL31RA;SEMA7A;ITGB3;GFRA1;CD9;SLC38A23;CD40LG;LOC1060466736;CEP5522;IL7R;CD226;IL11RA;CD40;CDH13
9	GO:0032652	BP	regulation of interleukin-1 production	9/ 2723	16/ 12028	0.5625	0.00365764	0.160625	gene12858;gene4693;gene12661;gene13258;gene4565;gene3800;gene15442;gene11205;gene11870	IL1R2;EGR1;HSPB1;CXCL1258;TNFAIP3;ARG2;ANXA1;LOC106039769;EYA20
9	GO:0034121	BP	regulation of toll-like receptor signaling pathway	9/ 2723	16/ 12028	0.5625	0.00365764	0.160625	gene19689;gene12566;gene4565;gene12495;gene13257;gene11888;gene14856;gene3889;gene10561	SARM1;RAB7B;TNFAIP3;PTPN22;CXCL1257;TIRAP;RAG16;IRF7;LOC106039090
9	GO:0050864	BP	regulation of B cell activation	9/ 2723	16/ 12028	0.5625	0.00365764	0.160625	gene6988;gene20631;gene15810;gene2407;gene15751;gene4565;gene20630;gene14202;gene3922	CASP3;KCNIP2631;LOC10604815310;IL6;BCL6;TNFAIP3;KCNIP2630;MSH2;LOC106031806
9	GO:0006956	BP	complement activation	9/ 2723	16/ 12028	0.5625	0.00365764	0.160625	gene20396;gene20397;gene11570;gene20665;gene20308;gene19609;gene20338;gene18460;gene8002	KCNIP2396;KCNIP2397;STK40;LOC106029527;LOC106049812;LOC106049106;KCNIP2338;NFKB260;C7
9	GO:0051250	BP	negative regulation of lymphocyte activation	9/ 2723	16/ 12028	0.5625	0.00365764	0.160625	gene14139;gene6988;gene4565;gene3800;gene15751;gene12495;gene2415;gene18301;gene15442	CBFB;CASP3;TNFAIP3;ARG2;BCL6;PTPN22;GPNMB;PRNP;ANXA1
35	GO:0009986	CC	cell surface	35/ 2723	99/ 12028	0.353535	0.00363675	0.160625	gene6809;gene11359;gene19671;gene11436;gene645;gene12268;gene496;gene16763;gene12997;gene6070;gene18301;gene18302;gene7975;gene8833;gene13258;gene12773;gene20631;gene20630;gene8439;gene15550;gene12427;gene16693;gene10798;gene11855;gene15768;gene3937;gene2864;gene1192;gene14118;gene6326;gene17041;gene6346;gene17324;gene12123;gene2370	THSD1;HSPD1;WNT4;WNT7A;FGFBP1;ACVR2A;LOC106033965;ITGB3;CX3CR1;LOC106034162;PRNP;PROM2;FGF10;HSPA2;CXCL1258;NOTCH2;KCNIP2631;KCNIP2630;WNT3A;MXRA8;GRIN2A;TNS1;WNT6;SLC2A105;CDH13;ITGBL1;SULF1;SULF2;LPAR1;ACKR3;LOC106046290;FN1;LOC106046593;CDH4;ITGB2
60	GO:0022603	BP	regulation of anatomical structure morphogenesis	60/ 2723	189/ 12028	0.31746	0.00370668	0.162266	gene15613;gene606;gene15988;gene8973;gene8539;gene12661;gene1394;gene15810;gene11350;gene19614;gene645;gene16393;gene3332;gene6749;gene13515;gene16015;gene2925;gene9507;gene15442;gene3187;gene19671;gene2613;gene13559;gene9475;gene7326;gene1007;gene16763;gene7321;gene17622;gene5563;gene752;gene14022;gene10796;gene11205;gene13942;gene19633;gene12506;gene15187;gene4565;gene421;gene12509;gene7400;gen…	RHOB;MSX1;LOC106045044;FGF13;DCN;HSPB1;RHOV;LOC10604815310;HECW2;PALM;FGFBP1;AR;RHOF;PTPRM;WNT11;CDC42SE2;ITGB1BP1;LOC106037928;ANXA1;PTN;WNT4;ADGRB3;SPRY1;LOC106037948;SEMA3E;PHLDB2;ITGB3;HGF;FMNL1;FGF7;SYNE3;KANK1;WNT10A;LOC106039769;RHOV2;S100A1;STAMBPL106;SEMA7A;TNFAIP3;RET;WNT2B;ZSWIM6;WNT6;CDC42EP4;THBS2;LIMK1;FBLN1;LOC106037927;THBS1;LOC1060333288;LOC106044084;PARVB;LPAR1;NTRK2;CITED2;DSCA…
23	GO:0022407	BP	regulation of cell-cell adhesion	23/ 2723	58/ 12028	0.396552	0.00400396	0.174731	gene11359;gene19671;gene15810;gene3255;gene2407;gene8030;gene15442;gene6988;gene1485;gene3800;gene8984;gene10230;gene18301;gene11205;gene16336;gene2415;gene1932;gene14139;gene12495;gene4580;gene10220;gene17324;gene2315	HSPD1;WNT4;LOC10604815310;TRPV4;IL6;IL7R;ANXA1;CASP3;RAG1;ARG2;CD40LG;GATA3;PRNP;LOC106039769;CD9;GPNMB;KIF26B;CBFB;PTPN22;CITED2;PRKCQ;LOC106046593;LOC106030066
16	GO:0007204	BP	positive regulation of cytosolic calcium ion concentration	16/ 2723	36/ 12028	0.444444	0.00411786	0.17914	gene13258;gene14055;gene14052;gene14053;gene14118;gene15729;gene13572;gene5713;gene2105;gene17316;gene20364;gene12427;gene7870;gene13257;gene3255;gene10578	CXCL1258;GPR174;LPAR4;LOC106042993;LPAR1;ANXA8L129;TRPC3;CIB2;ADCY5;EDN2;MOCS14;GRIN2A;AGTR1;CXCL1257;TRPV4;CHRNA9
7	GO:0006909	BP	phagocytosis	7/ 2723	11/ 12028	0.636364	0.00416666	0.179579	gene16763;gene8850;gene15442;gene16111;gene16015;gene7598;gene19767	ITGB3;HHEX50;ANXA1;RAB11FIP2;CDC42SE2;LOC1060337568;IRF8
7	GO:0050868	BP	negative regulation of T cell activation	7/ 2723	11/ 12028	0.636364	0.00416666	0.179579	gene14139;gene6988;gene3800;gene12495;gene2415;gene18301;gene15442	CBFB;CASP3;ARG2;PTPN22;GPNMB;PRNP;ANXA1
31	GO:0050708	BP	regulation of protein secretion	31/ 2723	86/ 12028	0.360465	0.00427659	0.183748	gene3255;gene777;gene3700;gene2407;gene15442;gene4347;gene2975;gene13411;gene2480;gene11169;gene3800;gene16574;gene4032;gene8984;gene20630;gene11205;gene10561;gene13258;gene20823;gene20631;gene4565;gene15729;gene13257;gene2105;gene4021;gene11870;gene12858;gene7519;gene1172;gene12495;gene9649	TRPV4;CHGA;TLR5;IL6;ANXA1;LOC106032265;VSNL1;PTGR21;DPH3;IL18;ARG2;MARCH874;TCF7L2;CD40LG;KCNIP2630;LOC106039769;LOC106039090;CXCL1258;LOC106029694;KCNIP2631;TNFAIP3;ANXA8L129;CXCL1257;ADCY5;ADRA2A;EYA20;IL1R2;IGF1;HNF4A;PTPN22;BLK
94	GO:0099080	CC	supramolecular complex	94/ 2723	319/ 12028	0.294671	0.00430398	0.184356	gene14409;gene14361;gene18427;gene8973;gene5782;gene6723;gene19150;gene20066;gene20067;gene20068;gene20069;gene4973;gene16999;gene1382;gene1932;gene9790;gene17804;gene7515;gene14015;gene8301;gene6346;gene11741;gene19736;gene2468;gene19738;gene19739;gene8154;gene16684;gene9552;gene19240;gene19242;gene19243;gene17879;gene19245;gene19246;gene8702;gene2265;gene20639;gene19742;gene1913;gene15645;gene1…	LOC106043362;TRIM71;NFKB227;FGF13;KIF18A;NDC80;TTK;KCNIP2066;KCNIP2067;KCNIP2068;KCNIP2069;PRKAA2;SNCAIP;NUSAP1;KIF26B;FBLN1;TPX2;NUP37;MAP1B;CCT4;FN1;LMNB1;RMDN26;WIPF3;RMDN28;LOC106049217;SYNM;NAV34;CEP5552;LOC106048701;LOC106048696;LOC106048705;LOC106047203;LOC106048703;LOC106048699;TUBB4B;PAPSS25;KCNIP2639;LOC106049222;MAP1LC3C;SLC1A4;KATNAL1;CDK1;KNSTRN;AICDA;LMNB2;LOC106048691;LOC106048678;…
55	GO:0016477	BP	cell migration	55/ 2723	172/ 12028	0.319767	0.00434205	0.185416	gene15613;gene8973;gene19390;gene11436;gene777;gene15768;gene14127;gene3332;gene1800;gene12589;gene19844;gene19845;gene15442;gene3187;gene3922;gene12205;gene13515;gene20213;gene7610;gene16763;gene7321;gene9522;gene15338;gene14022;gene1209;gene17316;gene2925;gene11403;gene11205;gene13942;gene12638;gene5943;gene15187;gene3937;gene4565;gene15729;gene10138;gene13257;gene421;gene16250;gene8900;gene191…	RHOB;FGF13;DOCK5;WNT7A;CHGA;CDH13;BCAR1;RHOF;ANO6;STAMBPL189;LOC106049328;LOC106049327;ANXA1;PTN;LOC106031806;SDC4;WNT11;IL1B;RAC2;ITGB3;HGF;CEP5522;PLAT;KANK1;SNAI1;EDN2;ITGB1BP1;KIF20B03;LOC106039769;RHOV2;LOC106041491;CYR61;SEMA7A;ITGBL1;TNFAIP3;ANXA8L129;SLC35G138;CXCL1257;RET;NTRK2;PSTPIP2;RHOG;SBDS;RLTPR;MSTN;PPARD;COTL1;LOC106044084;LPAR1;PRKCQ;CH25H;LOC106048595;FN1;ANKRD2223;ITGB2
11	GO:2000181	BP	negative regulation of blood vessel morphogenesis	11/ 2723	22/ 12028	0.5	0.00446609	0.188974	gene9475;gene7326;gene19671;gene3818;gene8539;gene9508;gene6749;gene8959;gene2925;gene15519;gene2613	LOC106037948;SEMA3E;WNT4;THBS1;DCN;LOC106037927;PTPRM;TNMD;ITGB1BP1;THBS2;ADGRB3
11	GO:0032231	BP	regulation of actin filament bundle assembly	11/ 2723	22/ 12028	0.5	0.00446609	0.188974	gene9552;gene12800;gene19671;gene14118;gene5146;gene13658;gene2925;gene11205;gene1007;gene12312;gene13515	CEP5552;MYOC;WNT4;LPAR1;HSD11B2;ARHGAP6;ITGB1BP1;LOC106039769;PHLDB2;LIMK1;WNT11
11	GO:0031225	CC	anchored component of membrane	11/ 2723	22/ 12028	0.5	0.00446609	0.188974	gene4053;gene1822;gene10690;gene17118;gene17556;gene10693;gene9004;gene13318;gene18301;gene3486;gene15768	GFRA1;CNTN1;GPC1;GPC5;CA4;LOC106039183;GPC4;LOC106042178;PRNP;LOC106031280;CDH13
34	GO:0030335	BP	positive regulation of cell migration	34/ 2723	96/ 12028	0.354167	0.004505	0.190043	gene15613;gene3187;gene12661;gene11436;gene3255;gene645;gene15768;gene15442;gene13515;gene12800;gene16763;gene7321;gene5563;gene8059;gene14127;gene17316;gene13942;gene5943;gene13258;gene15187;gene4789;gene19621;gene421;gene13257;gene9869;gene7610;gene2925;gene5162;gene6420;gene4021;gene1209;gene2415;gene9870;gene9713	RHOB;PTN;HSPB1;WNT7A;TRPV4;FGFBP1;CDH13;ANXA1;WNT11;MYOC;ITGB3;HGF;FGF7;ARHGEF39;BCAR1;EDN2;RHOV2;CYR61;CXCL1258;SEMA7A;ANXA79;MADCAM1;RET;CXCL1257;LOC106038356;RAC2;ITGB1BP1;RLTPR;MSTN;ADRA2A;SNAI1;GPNMB;LOC106038357;PLA2G7
23	GO:0002697	BP	regulation of immune effector process	23/ 2723	59/ 12028	0.389831	0.00454336	0.191079	gene11359;gene2407;gene2596;gene8030;gene15751;gene15442;gene14202;gene16609;gene7610;gene20338;gene9572;gene8984;gene11205;gene17686;gene5733;gene15187;gene20631;gene20630;gene13257;gene18524;gene12495;gene13348;gene2370	HSPD1;IL6;PPRC196;IL7R;BCL6;ANXA1;MSH2;ADORA2B;RAC2;KCNIP2338;DNASE1L3;CD40LG;LOC106039769;TRAF3;SERPING1;SEMA7A;KCNIP2631;KCNIP2630;CXCL1257;GPATCH3;PTPN22;CD226;ITGB2
18	GO:0019838	MF	growth factor binding	18/ 2723	42/ 12028	0.428571	0.00455701	0.191079	gene20213;gene12858;gene16702;gene12268;gene15122;gene2591;gene14322;gene9996;gene645;gene3030;gene9522;gene16250;gene4522;gene20076;gene19161;gene20084;gene10215;gene5943	IL1B;IL1R2;IGFBP2;ACVR2A;LOC106044084;PPRC191;LOC10604643922;NOV;FGFBP1;ARHGAP1930;CEP5522;NTRK2;CTGF;IGFBP4;IL11RA;COL2A1;IL2RA;CYR61
16	GO:1903531	BP	negative regulation of secretion by cell	16/ 2723	37/ 12028	0.432432	0.00508372	0.20938	gene4021;gene2480;gene12858;gene13258;gene20631;gene4565;gene3800;gene777;gene12495;gene13257;gene7519;gene20630;gene15442;gene11205;gene2975;gene10561	ADRA2A;DPH3;IL1R2;CXCL1258;KCNIP2631;TNFAIP3;ARG2;CHGA;PTPN22;CXCL1257;IGF1;KCNIP2630;ANXA1;LOC106039769;VSNL1;LOC106039090
16	GO:0051048	BP	negative regulation of secretion	16/ 2723	37/ 12028	0.432432	0.00508372	0.20938	gene4021;gene2480;gene12858;gene13258;gene20631;gene4565;gene3800;gene777;gene12495;gene13257;gene7519;gene20630;gene15442;gene11205;gene2975;gene10561	ADRA2A;DPH3;IL1R2;CXCL1258;KCNIP2631;TNFAIP3;ARG2;CHGA;PTPN22;CXCL1257;IGF1;KCNIP2630;ANXA1;LOC106039769;VSNL1;LOC106039090
48	GO:0007167	BP	enzyme linked receptor protein signaling pathway	48/ 2723	147/ 12028	0.326531	0.0052581	0.213847	gene15854;gene606;gene12268;gene11699;gene12661;gene4693;gene2864;gene10060;gene15402;gene9552;gene6211;gene8074;gene16763;gene7321;gene18243;gene7933;gene3030;gene14127;gene8439;gene7975;gene6988;gene8920;gene13562;gene2120;gene15801;gene12357;gene421;gene2646;gene16250;gene20236;gene4254;gene4941;gene6420;gene8107;gene17807;gene1192;gene19317;gene10304;gene8127;gene8200;gene4580;gene4907;gene55…	INSR;MSX1;ACVR2A;FGF9;HSPB1;EGR1;SULF1;IRS4;IRS2;CEP5552;LCP2;NPR2;ITGB3;HGF;FGF12;IRS1;ARHGAP1930;BCAR1;WNT3A;FGF10;CASP3;SMAD7;PLA2G4F2;ADAM80;LOC10604815301;FLT3;RET;BMP5;NTRK2;KCNIP2236;FAM83G;ROR1;MSTN;NTRK3;DUSP15;SULF2;MST1R;FOS;RGMA;GRB10;CITED2;CYFIP2;FGF7;GDAP1L14;MTMR4;PDZD3;LOC106047531;BLK
20	GO:0050867	BP	positive regulation of cell activation	20/ 2723	49/ 12028	0.408163	0.00527045	0.213847	gene16609;gene14139;gene11359;gene11169;gene1485;gene15810;gene15751;gene10230;gene2407;gene12495;gene8984;gene10220;gene8030;gene13348;gene13257;gene15442;gene14202;gene3922;gene2315;gene2370	ADORA2B;CBFB;HSPD1;IL18;RAG1;LOC10604815310;BCL6;GATA3;IL6;PTPN22;CD40LG;PRKCQ;IL7R;CD226;CXCL1257;ANXA1;MSH2;LOC106031806;LOC106030066;ITGB2
30	GO:0051051	BP	negative regulation of transport	30/ 2723	83/ 12028	0.361446	0.00528434	0.213847	gene14934;gene6965;gene11350;gene777;gene8200;gene2636;gene15442;gene2975;gene2480;gene3800;gene18302;gene20630;gene11205;gene13482;gene10561;gene13258;gene19382;gene20631;gene4565;gene13257;gene2804;gene2731;gene2925;gene4021;gene12858;gene7519;gene12495;gene20035;gene1430;gene16801	NDFIP2;MTNR1A;HECW2;CHGA;GRB10;RAB23;ANXA1;VSNL1;DPH3;ARG2;PROM2;KCNIP2630;LOC106039769;KCNE3;LOC106039090;CXCL1258;STC1;KCNIP2631;TNFAIP3;CXCL1257;FABP5;GEM;ITGB1BP1;ADRA2A;IL1R2;IGF1;PTPN22;CLIC2;PACSIN3;PRKCB
15	GO:0050679	BP	positive regulation of epithelial cell proliferation	15/ 2723	33/ 12028	0.454545	0.00530326	0.21399	gene14167;gene12773;gene3187;gene5563;gene11436;gene15729;gene4032;gene645;gene4565;gene2646;gene15756;gene11699;gene8439;gene16393;gene15768	CREB3L17;NOTCH2;PTN;FGF7;WNT7A;ANXA8L129;TCF7L2;FGFBP1;TNFAIP3;BMP5;ANXA8L156;FGF9;WNT3A;AR;CDH13
13	GO:0046330	BP	positive regulation of JNK cascade	13/ 2723	28/ 12028	0.464286	0.00535944	0.215632	gene17807;gene11436;gene3255;gene11989;gene8984;gene19925;gene13257;gene11888;gene11687;gene138;gene16004;gene11855;gene10561	DUSP15;WNT7A;TRPV4;DAB2IP;CD40LG;TRAF4;CXCL1257;TIRAP;PKIG7;ERCC6;SYK;SLC2A105;LOC106039090
8	GO:0051057	BP	positive regulation of small GTPase mediated signal transduction	8/ 2723	14/ 12028	0.571429	0.00542283	0.216307	gene13258;gene12773;gene14055;gene14052;gene14053;gene14118;gene13257;gene11205	CXCL1258;NOTCH2;GPR174;LPAR4;LOC106042993;LPAR1;CXCL1257;LOC106039769
8	GO:0050848	BP	regulation of calcium-mediated signaling	8/ 2723	14/ 12028	0.571429	0.00542283	0.216307	gene14419;gene20631;gene20630;gene20035;gene14442;gene18301;gene8358;gene15768	HOMER2;KCNIP2631;KCNIP2630;CLIC2;RCAN1;PRNP;LMCD1;CDH13
28	GO:0032993	CC	protein-DNA complex	28/ 2723	76/ 12028	0.368421	0.00541836	0.216307	gene1581;gene1583;gene1582;gene1585;gene1587;gene1485;gene1566;gene4032;gene19177;gene1565;gene19763;gene20120;gene88;gene1569;gene1568;gene20121;gene3979;gene6084;gene5161;gene7626;gene10304;gene18723;gene6619;gene13178;gene1575;gene1570;gene1571;gene14856	LOC1060481531;LOC1060481533;LOC1060481532;LOC1060481535;LOC1060481537;RAG1;LOC106045814;TCF7L2;KIF17;LOC106045810;GINS2;LOC106049629;HHEX;LOC106045823;LOC106045117;LOC106049626;CDHR19;FBXO30;LOC106033135;LOC106035790;FOS;LOC106048111;TEN1;LOC106042035;ANXA8L15;LOC106045851;LOC106045128;RAG16
61	GO:0048018	MF	receptor ligand activity	61/ 2723	195/ 12028	0.312821	0.00556022	0.221154	gene8681;gene8973;gene18995;gene11436;gene4789;gene9996;gene16525;gene2407;gene10796;gene2158;gene5563;gene19844;gene19845;gene3187;gene19671;gene8682;gene13515;gene20213;gene11169;gene7321;gene1270;gene18243;gene12195;gene12636;gene132;gene17316;gene12288;gene13967;gene11205;gene7975;gene12638;gene12292;gene18985;gene12290;gene12291;gene15187;gene19163;gene19382;gene13562;gene19162;gene13081;gen…	TNFSF8;FGF13;CSF1;WNT7A;ANXA79;NOV;MARCH825;IL6;WNT10A;GCG;FGF7;LOC106049328;LOC106049327;PTN;WNT4;TNFSF15;WNT11;IL1B;IL18;HGF;ANKRD220;FGF12;LOC106040927;LOC106041492;CXCL12;EDN2;LOC106041089;INHBA;LOC106039769;FGF10;LOC106041491;ATP9A2;NRTN;ATP9A0;ATP9A1;SEMA7A;LOC106048600;STC1;PLA2G4F2;LOC106048595;MTHFD2L;NPPC;GPNMB;LOC106038263;FGF9;SLC2A105;GHRH;MSTN;IGF1;RHOV2;BMP5;BDNF;LOC106045698;WNT3A…
61	GO:0030546	MF	signaling receptor activator activity	61/ 2723	196/ 12028	0.311224	0.00573882	0.227607	gene8681;gene8973;gene18995;gene11436;gene4789;gene9996;gene16525;gene2407;gene10796;gene2158;gene5563;gene19844;gene19845;gene3187;gene19671;gene8682;gene13515;gene20213;gene11169;gene7321;gene1270;gene18243;gene12195;gene12636;gene132;gene17316;gene12288;gene13967;gene11205;gene7975;gene12638;gene12292;gene18985;gene12290;gene12291;gene15187;gene19163;gene19382;gene13562;gene19162;gene13081;gen…	TNFSF8;FGF13;CSF1;WNT7A;ANXA79;NOV;MARCH825;IL6;WNT10A;GCG;FGF7;LOC106049328;LOC106049327;PTN;WNT4;TNFSF15;WNT11;IL1B;IL18;HGF;ANKRD220;FGF12;LOC106040927;LOC106041492;CXCL12;EDN2;LOC106041089;INHBA;LOC106039769;FGF10;LOC106041491;ATP9A2;NRTN;ATP9A0;ATP9A1;SEMA7A;LOC106048600;STC1;PLA2G4F2;LOC106048595;MTHFD2L;NPPC;GPNMB;LOC106038263;FGF9;SLC2A105;GHRH;MSTN;IGF1;RHOV2;BMP5;BDNF;LOC106045698;WNT3A…
6	GO:0051482	BP	positive regulation of cytosolic calcium ion concentration involved in phospholipase C-activating G protein-coupled signaling pathway	6/ 2723	9/ 12028	0.666667	0.00592354	0.23034	gene13258;gene14055;gene14052;gene14053;gene14118;gene13257	CXCL1258;GPR174;LPAR4;LOC106042993;LPAR1;CXCL1257
6	GO:0035567	BP	non-canonical Wnt signaling pathway	6/ 2723	9/ 12028	0.666667	0.00592354	0.23034	gene9508;gene19671;gene11436;gene4032;gene11073;gene13515	LOC106037927;WNT4;WNT7A;TCF7L2;FZD1;WNT11
6	GO:0034122	BP	negative regulation of toll-like receptor signaling pathway	6/ 2723	9/ 12028	0.666667	0.00592354	0.23034	gene19689;gene12566;gene4565;gene13257;gene14856;gene10561	SARM1;RAB7B;TNFAIP3;CXCL1257;RAG16;LOC106039090
6	GO:1903036	BP	positive regulation of response to wounding	6/ 2723	9/ 12028	0.666667	0.00592354	0.23034	gene4021;gene13258;gene3187;gene14022;gene15442;gene9706	ADRA2A;CXCL1258;PTN;KANK1;ANXA1;ENPP4
6	GO:0016445	BP	somatic diversification of immunoglobulins	6/ 2723	9/ 12028	0.666667	0.00592354	0.23034	gene11359;gene18685;gene1912;gene8984;gene16286;gene14202	HSPD1;AICDA;EXO1;CD40LG;SAMHD1;MSH2
6	GO:0045111	CC	intermediate filament cytoskeleton	6/ 2723	9/ 12028	0.666667	0.00592354	0.23034	gene3979;gene2105;gene8154;gene7174;gene1007;gene5162	CDHR19;ADCY5;SYNM;MDN1;PHLDB2;RLTPR
6	GO:0042287	MF	MHC protein binding	6/ 2723	9/ 12028	0.666667	0.00592354	0.23034	gene6211;gene20335;gene4855;gene20084;gene20641;gene20642	LCP2;KCNIP2335;CD74;COL2A1;KCNIP2641;TAP2
43	GO:0051707	BP	response to other organism	43/ 2723	130/ 12028	0.330769	0.00594966	0.230711	gene12661;gene20548;gene777;gene3700;gene2407;gene4367;gene7438;gene2836;gene3889;gene9552;gene16286;gene1484;gene17830;gene13927;gene20778;gene9727;gene13649;gene3860;gene3796;gene19767;gene19641;gene10561;gene17686;gene6988;gene11570;gene20823;gene19609;gene13257;gene1716;gene18293;gene4347;gene18685;gene20213;gene19459;gene20308;gene15783;gene2596;gene12946;gene14957;gene3857;gene14856;gene127…	HSPB1;LOC106029404;CHGA;TLR5;IL6;GUCY1A3;LOC106035746;LY96;IRF7;CEP5552;SAMHD1;RAG2;LOC106047130;LOC106042804;KCNIP2778;KCNJ8;TLR7;COCH;TMEM229B;IRF8;LOC106049124;LOC106039090;TRAF3;CASP3;STK40;LOC106029694;LOC106049106;CXCL1257;LYZ;GKN2;LOC106032265;AICDA;IL1B;IRF5;LOC106049812;COTL1;PPRC196;HMGB2;JCHAIN;PRKD1;RAG16;ANKRD2247;PTPN218
52	GO:0043066	BP	negative regulation of apoptotic process	52/ 2723	163/ 12028	0.319018	0.00610044	0.235901	gene10720;gene18317;gene606;gene11359;gene19671;gene12661;gene17471;gene11436;gene2407;gene16393;gene8030;gene15751;gene12580;gene14202;gene9085;gene20084;gene19195;gene13515;gene6988;gene1485;gene7321;gene15351;gene3800;gene4032;gene8984;gene14384;gene18522;gene1789;gene8689;gene8705;gene18301;gene3842;gene9507;gene5943;gene9519;gene16236;gene4973;gene4565;gene15729;gene16250;gene11812;gene6247;…	OPA1;SIAH2;MSX1;HSPD1;WNT4;HSPB1;SOCS3;WNT7A;IL6;AR;IL7R;BCL6;NUAK2;MSH2;ASNS;COL2A1;LOC106048637;WNT11;CASP3;RAG1;HGF;LOC106044437;ARG2;TCF7L2;CD40LG;BCL2A1;SFN;AMIGO2;LOC106037040;TOR4A;PRNP;ACTC1;LOC106037928;CYR61;CEP5519;DAPK1;PRKAA2;TNFAIP3;ANXA8L129;NTRK2;PIM3;GABRB2;RARB;LOC106029448;CDK1;SNAI1;ANGPTL4;XIAP;CITED2;PRKCQ;ACKR3;LOC106046136
325	GO:0048518	BP	positive regulation of biological process	325/ 2723	1263/ 12028	0.257324	0.00619129	0.236086	gene11987;gene18627;gene11359;gene14361;gene18995;gene17512;gene15810;gene11350;gene10690;gene645;gene2407;gene9532;gene4209;gene10796;gene4361;gene13515;gene4367;gene20575;gene9085;gene12509;gene3889;gene16645;gene11882;gene14167;gene12800;gene9769;gene15768;gene6479;gene3800;gene6723;gene15176;gene10230;gene3805;gene343;gene17316;gene13238;gene4919;gene349;gene4789;gene18301;gene2532;gene13942;…	GSN;PTRF;HSPD1;TRIM71;CSF1;CDC25A;LOC10604815310;HECW2;GPC1;FGFBP1;IL6;RSPO1;LOC106032083;WNT10A;RBM46;WNT11;GUCY1A3;KCNIP2575;ASNS;WNT2B;IRF7;CCND3;CDON;CREB3L17;MYOC;LOC106038244;CDH13;KPNA2;ARG2;NDC80;LOC106044180;GATA3;PLEK2;ARID5B;EDN2;CXCL1238;EBF1;CDK1;ANXA79;PRNP;PPRC132;RHOV2;LOC106041491;TFCP2L1;HSPA8;CD226;KCNIP2396;KCNIP2397;RASL10B;MARCH874;PRKAA2;LOC106041556;CXCL1257;JUN;MECOM;DAB2…
9	GO:0034341	BP	response to interferon-gamma	9/ 2723	17/ 12028	0.529412	0.00622394	0.236086	gene16236;gene12566;gene19767;gene9570;gene20707;gene17145;gene19162;gene6427;gene12638	DAPK1;RAB7B;IRF8;CEP5570;LOC106029573;LOC106046397;LOC106048595;CDC42EP4;LOC106041491
9	GO:0071346	BP	cellular response to interferon-gamma	9/ 2723	17/ 12028	0.529412	0.00622394	0.236086	gene16236;gene12566;gene19767;gene9570;gene20707;gene17145;gene19162;gene6427;gene12638	DAPK1;RAB7B;IRF8;CEP5570;LOC106029573;LOC106046397;LOC106048595;CDC42EP4;LOC106041491
15	GO:0031072	MF	heat shock protein binding	15/ 2723	34/ 12028	0.441176	0.00614688	0.236086	gene11588;gene349;gene10334;gene5716;gene3279;gene18743;gene12312;gene12027;gene8307;gene4724;gene11205;gene2637;gene19506;gene11109;gene2370	DNAJA1;CDK1;AHSA1;CPN116;FICD;FKBP4;LIMK1;HSPA5;AHSA2;NR3C1;LOC106039769;BAG2;LOC106048968;HSPA8;ITGB2
9	GO:0005109	MF	frizzled binding	9/ 2723	17/ 12028	0.529412	0.00622394	0.236086	gene19671;gene11436;gene10796;gene12509;gene12301;gene9532;gene8439;gene11855;gene13515	WNT4;WNT7A;WNT10A;WNT2B;RNF43;RSPO1;WNT3A;SLC2A105;WNT11
22	GO:0043087	BP	regulation of GTPase activity	22/ 2723	57/ 12028	0.385965	0.00642674	0.24115	gene19498;gene15988;gene19671;gene15751;gene16111;gene12205;gene12028;gene13515;gene18302;gene19119;gene17406;gene13559;gene12638;gene13258;gene13257;gene16250;gene2925;gene11855;gene12254;gene19162;gene6023;gene6149	LOC106048962;LOC106045044;WNT4;BCL6;RAB11FIP2;SDC4;GAPVD1;WNT11;PROM2;RHOG;TBC1D9;SPRY1;LOC106041491;CXCL1258;CXCL1257;NTRK2;ITGB1BP1;SLC2A105;ARHGAP15;LOC106048595;ARHGAP42;SNX9
10	GO:0050866	BP	negative regulation of cell activation	10/ 2723	20/ 12028	0.5	0.00666174	0.249296	gene14139;gene6988;gene4565;gene3800;gene16336;gene15751;gene12495;gene2415;gene18301;gene15442	CBFB;CASP3;TNFAIP3;ARG2;CD9;BCL6;PTPN22;GPNMB;PRNP;ANXA1
53	GO:0043069	BP	negative regulation of programmed cell death	53/ 2723	167/ 12028	0.317365	0.00669081	0.249713	gene10720;gene18317;gene606;gene11359;gene19671;gene12661;gene17471;gene11436;gene2407;gene16393;gene8030;gene15751;gene12580;gene14202;gene9085;gene20084;gene19195;gene13515;gene6988;gene1485;gene7321;gene15351;gene3800;gene4032;gene8984;gene14384;gene18522;gene1789;gene8689;gene8705;gene18301;gene3842;gene9507;gene5943;gene9519;gene16236;gene4973;gene4565;gene15729;gene16250;gene4080;gene11812;…	OPA1;SIAH2;MSX1;HSPD1;WNT4;HSPB1;SOCS3;WNT7A;IL6;AR;IL7R;BCL6;NUAK2;MSH2;ASNS;COL2A1;LOC106048637;WNT11;CASP3;RAG1;HGF;LOC106044437;ARG2;TCF7L2;CD40LG;BCL2A1;SFN;AMIGO2;LOC106037040;TOR4A;PRNP;ACTC1;LOC106037928;CYR61;CEP5519;DAPK1;PRKAA2;TNFAIP3;ANXA8L129;NTRK2;MECOM;PIM3;GABRB2;RARB;LOC106029448;CDK1;SNAI1;ANGPTL4;XIAP;CITED2;PRKCQ;ACKR3;LOC106046136
56	GO:0060548	BP	negative regulation of cell death	56/ 2723	179/ 12028	0.312849	0.00684185	0.254667	gene10720;gene18317;gene606;gene11359;gene19671;gene12661;gene17471;gene11436;gene9996;gene2407;gene16393;gene8030;gene15751;gene12580;gene14202;gene9085;gene20084;gene19195;gene13515;gene6988;gene1485;gene7321;gene15351;gene3800;gene4032;gene8984;gene14384;gene18522;gene1789;gene8689;gene8705;gene18301;gene3842;gene9507;gene5943;gene9519;gene16236;gene4973;gene4565;gene15729;gene16250;gene4080;g…	OPA1;SIAH2;MSX1;HSPD1;WNT4;HSPB1;SOCS3;WNT7A;NOV;IL6;AR;IL7R;BCL6;NUAK2;MSH2;ASNS;COL2A1;LOC106048637;WNT11;CASP3;RAG1;HGF;LOC106044437;ARG2;TCF7L2;CD40LG;BCL2A1;SFN;AMIGO2;LOC106037040;TOR4A;PRNP;ACTC1;LOC106037928;CYR61;CEP5519;DAPK1;PRKAA2;TNFAIP3;ANXA8L129;NTRK2;MECOM;PIM3;GABRB2;RARB;LOC106029448;CDK1;SNAI1;ANGPTL4;XIAP;CITED2;PRKCQ;ACKR3;GPNMB;LOC106046136;ATF4
20	GO:0070372	BP	regulation of ERK1 and ERK2 cascade	20/ 2723	51/ 12028	0.392157	0.0069854	0.257941	gene9790;gene13258;gene12773;gene15187;gene3255;gene2925;gene16861;gene12495;gene13257;gene3742;gene3089;gene11888;gene19162;gene6326;gene2415;gene3922;gene12638;gene15729;gene5943;gene13559	FBLN1;CXCL1258;NOTCH2;SEMA7A;TRPV4;ITGB1BP1;DUSP4;PTPN22;CXCL1257;ATF3;ARHGAP1989;TIRAP;LOC106048595;ACKR3;GPNMB;LOC106031806;LOC106041491;ANXA8L129;CYR61;SPRY1
15	GO:0019221	BP	cytokine-mediated signaling pathway	15/ 2723	35/ 12028	0.428571	0.0074936	0.272372	gene17686;gene4693;gene19459;gene8744;gene2407;gene132;gene17316;gene8347;gene19162;gene1439;gene11335;gene5370;gene3889;gene12638;gene3131	TRAF3;EGR1;IRF5;TRAF2;IL6;CXCL12;EDN2;IRAK2;LOC106048595;LOC1060464399;STAT4;CDIP1;IRF7;LOC106041491;ADIPOR2
15	GO:0001227	MF	DNA-binding transcription repressor activity, RNA polymerase II-specific	15/ 2723	35/ 12028	0.428571	0.0074936	0.272372	gene16925;gene606;gene3742;gene8314;gene10138;gene1209;gene8380;gene20004;gene4653;gene88;gene10230;gene15751;gene1439;gene17689;gene19767	PPARD;MSX1;ATF3;BCL11A;SLC35G138;SNAI1;BHLHE40;LOC106049496;PRDM1;HHEX;GATA3;BCL6;LOC1060464399;RCOR1;IRF8
15	GO:0001217	MF	DNA-binding transcription repressor activity	15/ 2723	35/ 12028	0.428571	0.0074936	0.272372	gene16925;gene606;gene3742;gene8314;gene10138;gene1209;gene8380;gene20004;gene4653;gene88;gene10230;gene15751;gene1439;gene17689;gene19767	PPARD;MSX1;ATF3;BCL11A;SLC35G138;SNAI1;BHLHE40;LOC106049496;PRDM1;HHEX;GATA3;BCL6;LOC1060464399;RCOR1;IRF8
83	GO:0033043	BP	regulation of organelle organization	83/ 2723	282/ 12028	0.294326	0.0075775	0.273991	gene10720;gene11987;gene606;gene8228;gene8973;gene15613;gene10048;gene1394;gene11350;gene11254;gene11985;gene11883;gene2495;gene4209;gene12024;gene3332;gene12772;gene2925;gene3885;gene5505;gene19671;gene1961;gene1007;gene10982;gene13515;gene9552;gene7326;gene13658;gene12800;gene16763;gene7321;gene17622;gene6218;gene6723;gene19150;gene14022;gene12312;gene15442;gene13238;gene13411;gene17645;gene369…	OPA1;GSN;MSX1;PTPN218;FGF13;RHOB;CAPN6;RHOV;HECW2;EED;CNTRL;CHEK1;KAT2B;LOC106032083;LOC106040731;RHOF;SEC22B;ITGB1BP1;RASSF7;BAIAP2L1;WNT4;FEZ2;PHLDB2;CBLN1;WNT11;CEP5552;SEMA3E;ARHGAP6;MYOC;ITGB3;HGF;FMNL1;LOC10603787018;NDC80;TTK;KANK1;LIMK1;ANXA1;CXCL1238;PTGR21;ACTR3B;CAPN2;STXBP6;SPIRE2;LOC106033657;NOTCH2;LOC1060339722;RAB3IP0;MARCH874;PRKAA2;KIF20B;FZR1;CXCL1257;LOC106039322;PLEKHH2;NEK2;…
25	GO:0035023	BP	regulation of Rho protein signal transduction	25/ 2723	67/ 12028	0.373134	0.00762433	0.27497	gene2690;gene16208;gene15751;gene16015;gene6275;gene8116;gene9552;gene56;gene8059;gene14022;gene11205;gene6111;gene13258;gene19959;gene13257;gene4110;gene14055;gene14052;gene14053;gene14118;gene1195;gene19164;gene11683;gene6023;gene2359	ARHGEF10;ARHGEF38;BCL6;CDC42SE2;ARHGEF37;AKAP13;CEP5552;DNMBP;ARHGEF39;KANK1;LOC106039769;PLEKHG1;CXCL1258;LOC106049445;CXCL1257;ECT2;GPR174;LPAR4;LOC106042993;LPAR1;PREX1;DLC1;SPATA13;ARHGAP42;ALS2
32	GO:0022604	BP	regulation of cell morphogenesis	32/ 2723	91/ 12028	0.351648	0.00770947	0.277322	gene15613;gene15988;gene8973;gene1394;gene11436;gene11350;gene19614;gene3332;gene16015;gene15442;gene7326;gene16763;gene17622;gene14022;gene11205;gene13942;gene12506;gene15187;gene421;gene16250;gene2925;gene6427;gene12312;gene9790;gene5338;gene14118;gene9772;gene7400;gene9507;gene7829;gene752;gene8613	RHOB;LOC106045044;FGF13;RHOV;WNT7A;HECW2;PALM;RHOF;CDC42SE2;ANXA1;SEMA3E;ITGB3;FMNL1;KANK1;LOC106039769;RHOV2;STAMBPL106;SEMA7A;RET;NTRK2;ITGB1BP1;CDC42EP4;LIMK1;FBLN1;LOC1060333288;LPAR1;PARVB;ZSWIM6;LOC106037928;DSCAM;SYNE3;CHODL
7	GO:2001014	BP	regulation of skeletal muscle cell differentiation	7/ 2723	12/ 12028	0.583333	0.00805533	0.281681	gene19671;gene7321;gene10690;gene2200;gene12205;gene12904;gene6420	WNT4;HGF;GPC1;KLHL41;SDC4;RBM24;MSTN
7	GO:0019229	BP	regulation of vasoconstriction	7/ 2723	12/ 12028	0.583333	0.00805533	0.281681	gene4021;gene13258;gene4930;gene11403;gene17316;gene7870;gene6023	ADRA2A;CXCL1258;HRH2;KIF20B03;EDN2;AGTR1;ARHGAP42
7	GO:0030593	BP	neutrophil chemotaxis	7/ 2723	12/ 12028	0.583333	0.00805533	0.281681	gene19845;gene9522;gene17316;gene19844;gene19162;gene12638;gene2370	LOC106049327;CEP5522;EDN2;LOC106049328;LOC106048595;LOC106041491;ITGB2
7	GO:0032663	BP	regulation of interleukin-2 production	7/ 2723	12/ 12028	0.583333	0.00805533	0.281681	gene14856;gene14419;gene4565;gene10220;gene18301;gene15442;gene13411	RAG16;HOMER2;TNFAIP3;PRKCQ;PRNP;ANXA1;PTGR21
7	GO:1990266	BP	neutrophil migration	7/ 2723	12/ 12028	0.583333	0.00805533	0.281681	gene19845;gene9522;gene17316;gene19844;gene19162;gene12638;gene2370	LOC106049327;CEP5522;EDN2;LOC106049328;LOC106048595;LOC106041491;ITGB2
5	GO:0014842	BP	regulation of skeletal muscle satellite cell proliferation	5/ 2723	7/ 12028	0.714286	0.0082151	0.281681	gene16925;gene10690;gene12205;gene7321;gene6420	PPARD;GPC1;SDC4;HGF;MSTN
5	GO:0002208	BP	somatic diversification of immunoglobulins involved in immune response	5/ 2723	7/ 12028	0.714286	0.0082151	0.281681	gene1912;gene14202;gene8984;gene11359;gene18685	EXO1;MSH2;CD40LG;HSPD1;AICDA
5	GO:0002204	BP	somatic recombination of immunoglobulin genes involved in immune response	5/ 2723	7/ 12028	0.714286	0.0082151	0.281681	gene1912;gene14202;gene8984;gene11359;gene18685	EXO1;MSH2;CD40LG;HSPD1;AICDA
5	GO:0042984	BP	regulation of amyloid precursor protein biosynthetic process	5/ 2723	7/ 12028	0.714286	0.0082151	0.281681	gene11630;gene6851;gene18391;gene2754;gene13629	ITM2C;ITM2B;NECAB3;PCBD14;SOAT1
5	GO:0046627	BP	negative regulation of insulin receptor signaling pathway	5/ 2723	7/ 12028	0.714286	0.0082151	0.281681	gene10220;gene6420;gene16281;gene14022;gene8200	PRKCQ;MSTN;SLA2;KANK1;GRB10
5	GO:1900077	BP	negative regulation of cellular response to insulin stimulus	5/ 2723	7/ 12028	0.714286	0.0082151	0.281681	gene10220;gene6420;gene16281;gene14022;gene8200	PRKCQ;MSTN;SLA2;KANK1;GRB10
5	GO:0007530	BP	sex determination	5/ 2723	7/ 12028	0.714286	0.0082151	0.281681	gene16393;gene20236;gene19671;gene11699;gene4580	AR;KCNIP2236;WNT4;FGF9;CITED2
5	GO:0045190	BP	isotype switching	5/ 2723	7/ 12028	0.714286	0.0082151	0.281681	gene1912;gene14202;gene8984;gene11359;gene18685	EXO1;MSH2;CD40LG;HSPD1;AICDA
5	GO:0044298	CC	cell body membrane	5/ 2723	7/ 12028	0.714286	0.0082151	0.281681	gene20631;gene20630;gene13482;gene19011;gene19258	KCNIP2631;KCNIP2630;KCNE3;LOC10602987811;SLC4A8
5	GO:0004908	MF	interleukin-1 receptor activity	5/ 2723	7/ 12028	0.714286	0.0082151	0.281681	gene12858;gene12852;gene18252;gene12856;gene12857	IL1R2;IL18RAP;IL1RAP;LOC106041678;LOC106041672
14	GO:0042110	BP	T cell activation	14/ 2723	32/ 12028	0.4375	0.00918413	0.310847	gene16645;gene4693;gene11359;gene19671;gene1485;gene6216;gene2532;gene12495;gene13257;gene8030;gene15442;gene1484;gene3922;gene11169	CCND3;EGR1;HSPD1;WNT4;RAG1;DOCK2;PPRC132;PTPN22;CXCL1257;IL7R;ANXA1;RAG2;LOC106031806;IL18
14	GO:0030203	BP	glycosaminoglycan metabolic process	14/ 2723	32/ 12028	0.4375	0.00918413	0.310847	gene10004;gene7438;gene8539;gene1716;gene9984;gene290;gene15435;gene10226;gene10225;gene17463;gene11773;gene5436;gene1404;gene1752	EXT1;LOC106035746;DCN;LYZ;HAS2;CHST3;TMEM2;ITIH2;ITIH5;ENGASE;IDUA;XYLT1;CHST1;GNS
8	GO:0110151	BP	positive regulation of biomineralization	8/ 2723	15/ 12028	0.533333	0.0093347	0.310847	gene12268;gene19671;gene7661;gene1800;gene10798;gene3187;gene16418;gene5943	ACVR2A;WNT4;ATF4;ANO6;WNT6;PTN;SLC8A1;CYR61
8	GO:0042558	BP	pteridine-containing compound metabolic process	8/ 2723	15/ 12028	0.533333	0.0093347	0.310847	gene18281;gene652;gene4250;gene15033;gene1888;gene11553;gene275;gene6070	MTHFD2;QDPR;SHMT1;GCH1;MTR;MTHFR;PCBD1;LOC106034162
8	GO:0045661	BP	regulation of myoblast differentiation	8/ 2723	15/ 12028	0.533333	0.0093347	0.310847	gene16925;gene4789;gene899;gene8439;gene2200;gene11882;gene12904;gene6420	PPARD;ANXA79;BOC;WNT3A;KLHL41;CDON;RBM24;MSTN
8	GO:0070169	BP	positive regulation of biomineral tissue development	8/ 2723	15/ 12028	0.533333	0.0093347	0.310847	gene12268;gene19671;gene7661;gene1800;gene10798;gene3187;gene16418;gene5943	ACVR2A;WNT4;ATF4;ANO6;WNT6;PTN;SLC8A1;CYR61
8	GO:0001816	BP	cytokine production	8/ 2723	15/ 12028	0.533333	0.0093347	0.310847	gene20213;gene11359;gene2532;gene12509;gene13348;gene777;gene3889;gene13515	IL1B;HSPD1;PPRC132;WNT2B;CD226;CHGA;IRF7;WNT11
67	GO:0099513	CC	polymeric cytoskeletal fiber	67/ 2723	222/ 12028	0.301802	0.00935601	0.310847	gene10048;gene19243;gene14409;gene19736;gene2468;gene19738;gene19739;gene8154;gene16684;gene2637;gene15442;gene8973;gene19193;gene9552;gene7610;gene4323;gene17622;gene19240;gene17913;gene19242;gene3557;gene19245;gene19246;gene8702;gene18594;gene18593;gene20066;gene20067;gene20068;gene20069;gene11723;gene3842;gene13867;gene18599;gene20639;gene18591;gene9846;gene19742;gene3558;gene3559;gene19388;ge…	CAPN6;LOC106048705;LOC106043362;RMDN26;WIPF3;RMDN28;LOC106049217;SYNM;NAV34;BAG2;ANXA1;FGF13;MAP1A;CEP5552;RAC2;DCLK2;FMNL1;LOC106048701;SLC38A43;LOC106048696;LOC106031353;LOC106048703;LOC106048699;TUBB4B;LOC106048010;LOC106047978;KCNIP2066;KCNIP2067;KCNIP2068;KCNIP2069;HNF4A3;ACTC1;ERCC667;LOC106048011;KCNIP2639;LOC106047977;KIF15;LOC106049222;LOC106031351;LOC106031352;NEFM;NEFL;SLC1A4;PSTPIP2;N…
8	GO:0008484	MF	sulfuric ester hydrolase activity	8/ 2723	15/ 12028	0.533333	0.0093347	0.310847	gene6451;gene1192;gene2864;gene7504;gene14716;gene9245;gene4853;gene1752	ARSG;SULF2;SULF1;LOC106035671;ARSK;IDS;ARSI;GNS
11	GO:1901343	BP	negative regulation of vasculature development	11/ 2723	23/ 12028	0.478261	0.00954229	0.316282	gene9475;gene7326;gene19671;gene3818;gene8539;gene9508;gene6749;gene8959;gene2925;gene15519;gene2613	LOC106037948;SEMA3E;WNT4;THBS1;DCN;LOC106037927;PTPRM;TNMD;ITGB1BP1;THBS2;ADGRB3
57	GO:0048870	BP	cell motility	57/ 2723	184/ 12028	0.309783	0.00974228	0.322125	gene15613;gene11588;gene8973;gene19390;gene11436;gene777;gene11989;gene14127;gene3332;gene1800;gene12589;gene19844;gene19845;gene15442;gene3187;gene3922;gene12205;gene13515;gene20213;gene7610;gene16763;gene7321;gene9522;gene15338;gene14022;gene1209;gene17316;gene2925;gene11403;gene11205;gene13942;gene12638;gene5943;gene15187;gene3937;gene4565;gene15729;gene10138;gene13257;gene421;gene16250;gene89…	RHOB;DNAJA1;FGF13;DOCK5;WNT7A;CHGA;DAB2IP;BCAR1;RHOF;ANO6;STAMBPL189;LOC106049328;LOC106049327;ANXA1;PTN;LOC106031806;SDC4;WNT11;IL1B;RAC2;ITGB3;HGF;CEP5522;PLAT;KANK1;SNAI1;EDN2;ITGB1BP1;KIF20B03;LOC106039769;RHOV2;LOC106041491;CYR61;SEMA7A;ITGBL1;TNFAIP3;ANXA8L129;SLC35G138;CXCL1257;RET;NTRK2;PSTPIP2;RHOG;CDH13;SBDS;RLTPR;MSTN;PPARD;COTL1;LOC106044084;LPAR1;PRKCQ;CH25H;LOC106048595;FN1;ANKRD222…
16	GO:0051251	BP	positive regulation of lymphocyte activation	16/ 2723	38/ 12028	0.421053	0.00991958	0.322125	gene14139;gene11359;gene11169;gene1485;gene15810;gene12495;gene8984;gene2407;gene10230;gene10220;gene8030;gene15751;gene15442;gene14202;gene3922;gene2315	CBFB;HSPD1;IL18;RAG1;LOC10604815310;PTPN22;CD40LG;IL6;GATA3;PRKCQ;IL7R;BCL6;ANXA1;MSH2;LOC106031806;LOC106030066
9	GO:0050671	BP	positive regulation of lymphocyte proliferation	9/ 2723	18/ 12028	0.5	0.00997608	0.322125	gene11169;gene15810;gene12495;gene2407;gene10220;gene8984;gene15751;gene15442;gene3922	IL18;LOC10604815310;PTPN22;IL6;PRKCQ;CD40LG;BCL6;ANXA1;LOC106031806
9	GO:0070665	BP	positive regulation of leukocyte proliferation	9/ 2723	18/ 12028	0.5	0.00997608	0.322125	gene11169;gene15810;gene12495;gene2407;gene10220;gene8984;gene15751;gene15442;gene3922	IL18;LOC10604815310;PTPN22;IL6;PRKCQ;CD40LG;BCL6;ANXA1;LOC106031806
9	GO:0002285	BP	lymphocyte activation involved in immune response	9/ 2723	18/ 12028	0.5	0.00997608	0.322125	gene11359;gene18685;gene7614;gene1912;gene2532;gene13257;gene8984;gene14202;gene3922	HSPD1;AICDA;MFNG;EXO1;PPRC132;CXCL1257;CD40LG;MSH2;LOC106031806
9	GO:0032946	BP	positive regulation of mononuclear cell proliferation	9/ 2723	18/ 12028	0.5	0.00997608	0.322125	gene11169;gene15810;gene12495;gene2407;gene10220;gene8984;gene15751;gene15442;gene3922	IL18;LOC10604815310;PTPN22;IL6;PRKCQ;CD40LG;BCL6;ANXA1;LOC106031806
26	GO:0032103	BP	positive regulation of response to external stimulus	26/ 2723	72/ 12028	0.361111	0.0102163	0.322125	gene3187;gene12661;gene3255;gene2407;gene2836;gene3889;gene20213;gene7610;gene17316;gene3860;gene15768;gene10561;gene16609;gene4789;gene20823;gene13257;gene9869;gene4347;gene6420;gene17498;gene2596;gene12946;gene7829;gene13348;gene9870;gene9713	PTN;HSPB1;TRPV4;IL6;LY96;IRF7;IL1B;RAC2;EDN2;COCH;CDH13;LOC106039090;ADORA2B;ANXA79;LOC106029694;CXCL1257;LOC106038356;LOC106032265;MSTN;FASN;PPRC196;HMGB2;DSCAM;CD226;LOC106038357;PLA2G7
107	GO:2000026	BP	regulation of multicellular organismal development	107/ 2723	380/ 12028	0.281579	0.0105793	0.322125	gene8973;gene18995;gene11350;gene10690;gene645;gene2407;gene3922;gene9475;gene13942;gene15122;gene16576;gene7661;gene11699;gene12312;gene12816;gene3818;gene5338;gene17807;gene12946;gene9408;gene17925;gene12268;gene3187;gene12661;gene18522;gene19633;gene2613;gene10982;gene13559;gene1485;gene7829;gene8665;gene14022;gene11205;gene12773;gene8803;gene12566;gene19704;gene7768;gene2519;gene4508;gene1413…	FGF13;CSF1;HECW2;GPC1;FGFBP1;IL6;LOC106031806;LOC106037948;RHOV2;LOC106044084;MARCH876;ATF4;FGF9;LIMK1;LOC106041556;THBS1;LOC1060333288;DUSP15;HMGB2;NCMAP;SLC38A25;ACVR2A;PTN;HSPB1;SFN;S100A1;ADGRB3;CBLN1;SPRY1;RAG1;DSCAM;BRINP1;KANK1;LOC106039769;NOTCH2;PRKCH;RAB7B;OMD;EFHC2;RARB;LAMA2;CBFB;SNAI1;PPRC191;ZSWIM6;CITED2;F54;TNMD;MSX1;LOC106045044;BRINP3;EED;IL7R;MSH2;SDC4;SEMA3E;HGF;MYCL;AMIGO2;WN…
4	GO:0070884	BP	regulation of calcineurin-NFAT signaling cascade	4/ 2723	5/ 12028	0.8	0.0107394	0.322125	gene18301;gene14442;gene8358;gene14419	PRNP;RCAN1;LMCD1;HOMER2
4	GO:2001015	BP	negative regulation of skeletal muscle cell differentiation	4/ 2723	5/ 12028	0.8	0.0107394	0.322125	gene12205;gene10690;gene7321;gene6420	SDC4;GPC1;HGF;MSTN
4	GO:0051299	BP	centrosome separation	4/ 2723	5/ 12028	0.8	0.0107394	0.322125	gene3673;gene1261;gene17415;gene86	NEK2;AURKA;NDEL1;KIF11
4	GO:0040037	BP	negative regulation of fibroblast growth factor receptor signaling pathway	4/ 2723	5/ 12028	0.8	0.0107394	0.322125	gene1192;gene13559;gene19671;gene2864	SULF2;SPRY1;WNT4;SULF1
4	GO:1902725	BP	negative regulation of satellite cell differentiation	4/ 2723	5/ 12028	0.8	0.0107394	0.322125	gene12205;gene10690;gene7321;gene6420	SDC4;GPC1;HGF;MSTN
4	GO:0060219	BP	camera-type eye photoreceptor cell differentiation	4/ 2723	5/ 12028	0.8	0.0107394	0.322125	gene19911;gene12509;gene7829;gene11197	SDK2;WNT2B;DSCAM;DSCAML1
4	GO:0000727	BP	double-strand break repair via break-induced replication	4/ 2723	5/ 12028	0.8	0.0107394	0.322125	gene19763;gene9911;gene9675;gene9605	GINS2;MCM4;MCM3;MCM2
4	GO:0002440	BP	production of molecular mediator of immune response	4/ 2723	5/ 12028	0.8	0.0107394	0.322125	gene8030;gene11359;gene777;gene3489	IL7R;HSPD1;CHGA;VPREB3
4	GO:0034143	BP	regulation of toll-like receptor 4 signaling pathway	4/ 2723	5/ 12028	0.8	0.0107394	0.322125	gene11888;gene13257;gene12495;gene12566	TIRAP;CXCL1257;PTPN22;RAB7B
4	GO:0002566	BP	somatic diversification of immune receptors via somatic mutation	4/ 2723	5/ 12028	0.8	0.0107394	0.322125	gene1912;gene14202;gene16286;gene18685	EXO1;MSH2;SAMHD1;AICDA
4	GO:0106056	BP	regulation of calcineurin-mediated signaling	4/ 2723	5/ 12028	0.8	0.0107394	0.322125	gene18301;gene14442;gene8358;gene14419	PRNP;RCAN1;LMCD1;HOMER2
4	GO:0090025	BP	regulation of monocyte chemotaxis	4/ 2723	5/ 12028	0.8	0.0107394	0.322125	gene9870;gene9713;gene11494;gene9869	LOC106038357;PLA2G7;KIF20B94;LOC106038356
4	GO:0051023	BP	regulation of immunoglobulin secretion	4/ 2723	5/ 12028	0.8	0.0107394	0.322125	gene20631;gene20630;gene8984;gene2407	KCNIP2631;KCNIP2630;CD40LG;IL6
4	GO:2000272	BP	negative regulation of signaling receptor activity	4/ 2723	5/ 12028	0.8	0.0107394	0.322125	gene17926;gene17925;gene18638;gene15621	SLC38A26;SLC38A25;VPS25;CNRIP1
4	GO:0048642	BP	negative regulation of skeletal muscle tissue development	4/ 2723	5/ 12028	0.8	0.0107394	0.322125	gene12205;gene10690;gene7321;gene6420	SDC4;GPC1;HGF;MSTN
4	GO:0016446	BP	somatic hypermutation of immunoglobulin genes	4/ 2723	5/ 12028	0.8	0.0107394	0.322125	gene1912;gene14202;gene16286;gene18685	EXO1;MSH2;SAMHD1;AICDA
18	GO:0003018	BP	vascular process in circulatory system	18/ 2723	45/ 12028	0.4	0.0109958	0.322125	gene4021;gene13258;gene4315;gene4930;gene9430;gene3255;gene9021;gene11403;gene6023;gene18170;gene17316;gene6749;gene7410;gene2925;gene7870;gene11550;gene13257;gene15729	ADRA2A;CXCL1258;EDNRA;HRH2;MFSD2A;TRPV4;AGTR2;KIF20B03;ARHGAP42;LOC106047519;EDN2;PTPRM;HTR1A;ITGB1BP1;AGTR1;NPPC;CXCL1257;ANXA8L129
16	GO:0001818	BP	negative regulation of cytokine production	16/ 2723	39/ 12028	0.410256	0.0111247	0.322125	gene12858;gene2955;gene7321;gene14419;gene4565;gene3800;gene12495;gene18524;gene15751;gene13257;gene18301;gene15442;gene11205;gene2415;gene10561;gene13515	IL1R2;TRIB2;HGF;HOMER2;TNFAIP3;ARG2;PTPN22;GPATCH3;BCL6;CXCL1257;PRNP;ANXA1;LOC106039769;GPNMB;LOC106039090;WNT11
20	GO:0050878	BP	regulation of body fluid levels	20/ 2723	52/ 12028	0.384615	0.0114933	0.322125	gene9552;gene13258;gene15756;gene913;gene5733;gene18522;gene1901;gene3255;gene16336;gene7491;gene13257;gene10220;gene14465;gene20064;gene10862;gene19934;gene16816;gene3476;gene1800;gene9706	CEP5552;CXCL1258;ANXA8L156;F5;SERPING1;SFN;LOC1060298781;TRPV4;CD9;P2RY8;CXCL1257;PRKCQ;IL10RB;KCNIP2064;F3;LOC106049424;LOC1060466736;SERPIND1;ANO6;ENPP4
3	GO:1903523	BP	negative regulation of blood circulation	3/ 2723	3/ 12028	1	0.0115929	0.322125	gene6023;gene13258;gene13482	ARHGAP42;CXCL1258;KCNE3
3	GO:0090083	BP	regulation of inclusion body assembly	3/ 2723	3/ 12028	1	0.0115929	0.322125	gene8833;gene5716;gene16999	HSPA2;CPN116;SNCAIP
3	GO:0016601	BP	Rac protein signal transduction	3/ 2723	3/ 12028	1	0.0115929	0.322125	gene19119;gene7610;gene15768	RHOG;RAC2;CDH13
3	GO:0032673	BP	regulation of interleukin-4 production	3/ 2723	3/ 12028	1	0.0115929	0.322125	gene14856;gene10220;gene8984	RAG16;PRKCQ;CD40LG
3	GO:0034135	BP	regulation of toll-like receptor 2 signaling pathway	3/ 2723	3/ 12028	1	0.0115929	0.322125	gene13257;gene11888;gene10561	CXCL1257;TIRAP;LOC106039090
3	GO:1902292	BP	cell cycle DNA replication initiation	3/ 2723	3/ 12028	1	0.0115929	0.322125	gene9911;gene9675;gene9605	MCM4;MCM3;MCM2
3	GO:0072376	BP	protein activation cascade	3/ 2723	3/ 12028	1	0.0115929	0.322125	gene9790;gene6683;gene18649	FBLN1;F13A1;PRCP
3	GO:1902315	BP	nuclear cell cycle DNA replication initiation	3/ 2723	3/ 12028	1	0.0115929	0.322125	gene9911;gene9675;gene9605	MCM4;MCM3;MCM2
3	GO:0010566	BP	regulation of ketone biosynthetic process	3/ 2723	3/ 12028	1	0.0115929	0.322125	gene4693;gene19671;gene2646	EGR1;WNT4;BMP5
3	GO:0019724	BP	B cell mediated immunity	3/ 2723	3/ 12028	1	0.0115929	0.322125	gene1912;gene11359;gene3889	EXO1;HSPD1;IRF7
3	GO:0032753	BP	positive regulation of interleukin-4 production	3/ 2723	3/ 12028	1	0.0115929	0.322125	gene14856;gene10220;gene8984	RAG16;PRKCQ;CD40LG
3	GO:2000483	BP	negative regulation of interleukin-8 secretion	3/ 2723	3/ 12028	1	0.0115929	0.322125	gene15442;gene12495;gene10561	ANXA1;PTPN22;LOC106039090
3	GO:0002829	BP	negative regulation of type 2 immune response	3/ 2723	3/ 12028	1	0.0115929	0.322125	gene15442;gene3800;gene15751	ANXA1;ARG2;BCL6
3	GO:0035860	BP	glial cell-derived neurotrophic factor receptor signaling pathway	3/ 2723	3/ 12028	1	0.0115929	0.322125	gene1192;gene421;gene2864	SULF2;RET;SULF1
3	GO:0001782	BP	B cell homeostasis	3/ 2723	3/ 12028	1	0.0115929	0.322125	gene6988;gene4565;gene15810	CASP3;TNFAIP3;LOC10604815310
3	GO:2000659	BP	regulation of interleukin-1-mediated signaling pathway	3/ 2723	3/ 12028	1	0.0115929	0.322125	gene12858;gene20213;gene8326	IL1R2;IL1B;VRK2
3	GO:0014831	BP	gastro-intestinal system smooth muscle contraction	3/ 2723	3/ 12028	1	0.0115929	0.322125	gene1192;gene15729;gene2864	SULF2;ANXA8L129;SULF1
3	GO:0014858	BP	positive regulation of skeletal muscle cell proliferation	3/ 2723	3/ 12028	1	0.0115929	0.322125	gene10690;gene19671;gene7321	GPC1;WNT4;HGF
3	GO:1902975	BP	mitotic DNA replication initiation	3/ 2723	3/ 12028	1	0.0115929	0.322125	gene9911;gene9675;gene9605	MCM4;MCM3;MCM2
3	GO:2000515	BP	negative regulation of CD4-positive, alpha-beta T cell activation	3/ 2723	3/ 12028	1	0.0115929	0.322125	gene14139;gene15442;gene3800	CBFB;ANXA1;ARG2
3	GO:0034145	BP	positive regulation of toll-like receptor 4 signaling pathway	3/ 2723	3/ 12028	1	0.0115929	0.322125	gene13257;gene12495;gene11888	CXCL1257;PTPN22;TIRAP
3	GO:0046602	BP	regulation of mitotic centrosome separation	3/ 2723	3/ 12028	1	0.0115929	0.322125	gene3673;gene11883;gene86	NEK2;CHEK1;KIF11
3	GO:0035987	BP	endodermal cell differentiation	3/ 2723	3/ 12028	1	0.0115929	0.322125	gene2590;gene937;gene2370	COL12A1;COL8A1;ITGB2
3	GO:0072348	BP	sulfur compound transport	3/ 2723	3/ 12028	1	0.0115929	0.322125	gene5965;gene15485;gene6562	LRRC8D;SLC13A1;KNDC162
3	GO:0002638	BP	negative regulation of immunoglobulin production	3/ 2723	3/ 12028	1	0.0115929	0.322125	gene20631;gene20630;gene15751	KCNIP2631;KCNIP2630;BCL6
3	GO:0030238	BP	male sex determination	3/ 2723	3/ 12028	1	0.0115929	0.322125	gene16393;gene20236;gene11699	AR;KCNIP2236;FGF9
3	GO:0042481	BP	regulation of odontogenesis	3/ 2723	3/ 12028	1	0.0115929	0.322125	gene10798;gene606;gene10796	WNT6;MSX1;WNT10A
3	GO:0032490	BP	detection of molecule of bacterial origin	3/ 2723	3/ 12028	1	0.0115929	0.322125	gene20213;gene2836;gene10561	IL1B;LY96;LOC106039090
72	GO:0099512	CC	supramolecular fiber	72/ 2723	242/ 12028	0.297521	0.0102281	0.322125	gene10048;gene19243;gene14409;gene19736;gene2468;gene19738;gene19739;gene8154;gene16684;gene2637;gene15442;gene8973;gene19193;gene9552;gene7610;gene4323;gene17622;gene19240;gene17913;gene19242;gene3557;gene17879;gene19245;gene19246;gene8702;gene18594;gene18593;gene20066;gene20067;gene20068;gene20069;gene11723;gene15768;gene3842;gene13867;gene18599;gene20639;gene18591;gene9727;gene9846;gene19742;g…	CAPN6;LOC106048705;LOC106043362;RMDN26;WIPF3;RMDN28;LOC106049217;SYNM;NAV34;BAG2;ANXA1;FGF13;MAP1A;CEP5552;RAC2;DCLK2;FMNL1;LOC106048701;SLC38A43;LOC106048696;LOC106031353;LOC106047203;LOC106048703;LOC106048699;TUBB4B;LOC106048010;LOC106047978;KCNIP2066;KCNIP2067;KCNIP2068;KCNIP2069;HNF4A3;CDH13;ACTC1;ERCC667;LOC106048011;KCNIP2639;LOC106047977;KCNJ8;KIF15;LOC106049222;LOC106031351;LOC106031352;N…
72	GO:0099081	CC	supramolecular polymer	72/ 2723	242/ 12028	0.297521	0.0102281	0.322125	gene10048;gene19243;gene14409;gene19736;gene2468;gene19738;gene19739;gene8154;gene16684;gene2637;gene15442;gene8973;gene19193;gene9552;gene7610;gene4323;gene17622;gene19240;gene17913;gene19242;gene3557;gene17879;gene19245;gene19246;gene8702;gene18594;gene18593;gene20066;gene20067;gene20068;gene20069;gene11723;gene15768;gene3842;gene13867;gene18599;gene20639;gene18591;gene9727;gene9846;gene19742;g…	CAPN6;LOC106048705;LOC106043362;RMDN26;WIPF3;RMDN28;LOC106049217;SYNM;NAV34;BAG2;ANXA1;FGF13;MAP1A;CEP5552;RAC2;DCLK2;FMNL1;LOC106048701;SLC38A43;LOC106048696;LOC106031353;LOC106047203;LOC106048703;LOC106048699;TUBB4B;LOC106048010;LOC106047978;KCNIP2066;KCNIP2067;KCNIP2068;KCNIP2069;HNF4A3;CDH13;ACTC1;ERCC667;LOC106048011;KCNIP2639;LOC106047977;KCNJ8;KIF15;LOC106049222;LOC106031351;LOC106031352;N…
3	GO:0042825	CC	TAP complex	3/ 2723	3/ 12028	1	0.0115929	0.322125	gene20335;gene20641;gene20642	KCNIP2335;KCNIP2641;TAP2
3	GO:0032437	CC	cuticular plate	3/ 2723	3/ 12028	1	0.0115929	0.322125	gene6149;gene13411;gene5713	SNX9;PTGR21;CIB2
3	GO:0033270	CC	paranode region of axon	3/ 2723	3/ 12028	1	0.0115929	0.322125	gene18636;gene9408;gene17041	CNTNAP1;NCMAP;LOC106046290
3	GO:0031262	CC	Ndc80 complex	3/ 2723	3/ 12028	1	0.0115929	0.322125	gene18427;gene6723;gene2190	NFKB227;NDC80;SPC25
3	GO:0019814	CC	immunoglobulin complex	3/ 2723	3/ 12028	1	0.0115929	0.322125	gene16004;gene14957;gene17608	SYK;JCHAIN;CD79B
19	GO:0051082	MF	unfolded protein binding	19/ 2723	49/ 12028	0.387755	0.00992769	0.322125	gene5716;gene11588;gene2738;gene20224;gene7530;gene8648;gene12027;gene19111;gene10955;gene1713;gene12630;gene8301;gene5895;gene17700;gene8833;gene17411;gene19506;gene11109;gene8228	CPN116;DNAJA1;TMEM67;PPIH;HSP90B1;KIF1148;HSPA5;DNAJB5;TCP1;CCT2;CCT6A;CCT4;DNAJB4;HSP90AA1;HSPA2;CLGN;LOC106048968;HSPA8;PTPN218
12	GO:0019955	MF	cytokine binding	12/ 2723	27/ 12028	0.444444	0.0107349	0.322125	gene20213;gene7378;gene12997;gene12858;gene10735;gene17390;gene10215;gene9522;gene6326;gene19161;gene11494;gene2591	IL1B;IL31RA;CX3CR1;IL1R2;CXCR4;ACKR4;IL2RA;CEP5522;ACKR3;IL11RA;KIF20B94;PPRC191
4	GO:0070567	MF	cytidylyltransferase activity	4/ 2723	5/ 12028	0.8	0.0107394	0.322125	gene18766;gene9725;gene9051;gene18296	CDS1;CMAS;ISPD;CDS2
4	GO:1990817	MF	RNA adenylyltransferase activity	4/ 2723	5/ 12028	0.8	0.0107394	0.322125	gene18528;gene14060;gene14061;gene16539	FAM46B;FAM46D;LOC106043001;MARCH839
4	GO:0043394	MF	proteoglycan binding	4/ 2723	5/ 12028	0.8	0.0107394	0.322125	gene3122;gene20084;gene2415;gene15122	CECR1;COL2A1;GPNMB;LOC106044084
4	GO:0015440	MF	ATPase-coupled peptide transmembrane transporter activity	4/ 2723	5/ 12028	0.8	0.0107394	0.322125	gene20335;gene3356;gene20641;gene20642	KCNIP2335;ABCB9;KCNIP2641;TAP2
4	GO:0033220	MF	ATPase-coupled amide-transporter activity	4/ 2723	5/ 12028	0.8	0.0107394	0.322125	gene20335;gene3356;gene20641;gene20642	KCNIP2335;ABCB9;KCNIP2641;TAP2
16	GO:0004714	MF	transmembrane receptor protein tyrosine kinase activity	16/ 2723	39/ 12028	0.410256	0.0111247	0.322125	gene1040;gene15854;gene18452;gene530;gene8107;gene19317;gene20236;gene12357;gene421;gene15359;gene20014;gene16250;gene19272;gene9536;gene11465;gene3030	EPHA6;INSR;NFKB252;FGFR3;NTRK3;MST1R;KCNIP2236;FLT3;RET;FGFR1;FGFR4;NTRK2;EPHB6;CEP5536;KIF20B65;ARHGAP1930
3	GO:0004464	MF	leukotriene-C4 synthase activity	3/ 2723	3/ 12028	1	0.0115929	0.322125	gene12380;gene4837;gene4834	ALOX5AP;LOC106032815;LOC106032894
3	GO:0005007	MF	fibroblast growth factor-activated receptor activity	3/ 2723	3/ 12028	1	0.0115929	0.322125	gene20014;gene530;gene15359	FGFR4;FGFR3;FGFR1
3	GO:0019865	MF	immunoglobulin binding	3/ 2723	3/ 12028	1	0.0115929	0.322125	gene20631;gene20630;gene14957	KCNIP2631;KCNIP2630;JCHAIN
3	GO:0016494	MF	C-X-C chemokine receptor activity	3/ 2723	3/ 12028	1	0.0115929	0.322125	gene16692;gene6326;gene11238	LOC106045913;ACKR3;CXCR5
3	GO:0005030	MF	neurotrophin receptor activity	3/ 2723	3/ 12028	1	0.0115929	0.322125	gene8107;gene16250;gene20236	NTRK3;NTRK2;KCNIP2236
3	GO:0008449	MF	N-acetylglucosamine-6-sulfatase activity	3/ 2723	3/ 12028	1	0.0115929	0.322125	gene1192;gene1752;gene2864	SULF2;GNS;SULF1
6	GO:2000106	BP	regulation of leukocyte apoptotic process	6/ 2723	10/ 12028	0.6	0.0119845	0.326489	gene1485;gene3800;gene10955;gene10220;gene8030;gene15442	RAG1;ARG2;TCP1;PRKCQ;IL7R;ANXA1
6	GO:0014068	BP	positive regulation of phosphatidylinositol 3-kinase signaling	6/ 2723	10/ 12028	0.6	0.0119845	0.326489	gene13258;gene7321;gene8539;gene16925;gene13257;gene16250	CXCL1258;HGF;DCN;PPARD;CXCL1257;NTRK2
6	GO:0010633	BP	negative regulation of epithelial cell migration	6/ 2723	10/ 12028	0.6	0.0119845	0.326489	gene8539;gene19382;gene5716;gene17281;gene2925;gene6749	DCN;STC1;CPN116;SCD81;ITGB1BP1;PTPRM
6	GO:0042026	BP	protein refolding	6/ 2723	10/ 12028	0.6	0.0119845	0.326489	gene11359;gene20224;gene12027;gene8833;gene5716;gene11109	HSPD1;PPIH;HSPA5;HSPA2;CPN116;HSPA8
6	GO:0051496	BP	positive regulation of stress fiber assembly	6/ 2723	10/ 12028	0.6	0.0119845	0.326489	gene19671;gene14118;gene2925;gene11205;gene12312;gene13515	WNT4;LPAR1;ITGB1BP1;LOC106039769;LIMK1;WNT11
6	GO:0010837	BP	regulation of keratinocyte proliferation	6/ 2723	10/ 12028	0.6	0.0119845	0.326489	gene12773;gene18522;gene2591;gene5563;gene15756;gene3857	NOTCH2;SFN;PPRC191;FGF7;ANXA8L156;PRKD1
6	GO:0042813	MF	Wnt-activated receptor activity	6/ 2723	10/ 12028	0.6	0.0119845	0.326489	gene17618;gene3401;gene18661;gene2357;gene11073;gene16171	FZD2;FZD10;FZD4;FZD7;FZD1;FZD8
37	GO:0004857	MF	enzyme inhibitor activity	37/ 2723	112/ 12028	0.330357	0.0120605	0.327918	gene4924;gene11984;gene3187;gene11981;gene15442;gene11906;gene5032;gene6988;gene18695;gene9578;gene12661;gene5520;gene1168;gene20338;gene6331;gene3476;gene10548;gene11327;gene13581;gene5733;gene11408;gene16864;gene17377;gene11832;gene760;gene2822;gene13507;gene15683;gene16473;gene2591;gene2495;gene10080;gene18701;gene10225;gene10226;gene19513;gene6107	LOC106032659;C5;PTN;PHF19;ANXA1;APLP2;CDKN2C;CASP3;LOC106048078;CEP5578;HSPB1;PRKAR1B;PKIG;KCNIP2338;COL6A3;SERPIND1;LOC106039127;SERPINB5;LOC106042465;SERPING1;TIMP4;HOPX;COL6A6;ANOS1;LOC106036374;PKIA;SERPINH1;LOC1060451173;ANGPTL4;PPRC191;KAT2B;XIAP;LOC106048083;ITIH5;ITIH2;LOC106048983;LOC106034274
20	GO:0051271	BP	negative regulation of cellular component movement	20/ 2723	53/ 12028	0.377358	0.01276	0.345587	gene9790;gene15613;gene1007;gene15187;gene8539;gene19382;gene5716;gene16336;gene9571;gene14022;gene19671;gene6562;gene17281;gene11494;gene2925;gene17324;gene13482;gene13942;gene6749;gene13515	FBLN1;RHOB;PHLDB2;SEMA7A;DCN;STC1;CPN116;CD9;ABHD6;KANK1;WNT4;KNDC162;SCD81;KIF20B94;ITGB1BP1;LOC106046593;KCNE3;RHOV2;PTPRM;WNT11
22	GO:0044815	CC	DNA packaging complex	22/ 2723	60/ 12028	0.366667	0.0128652	0.347761	gene1581;gene1583;gene1582;gene1585;gene1587;gene18285;gene1566;gene19177;gene1565;gene20121;gene20120;gene1569;gene1568;gene658;gene6084;gene7626;gene18723;gene13178;gene1575;gene1570;gene1571;gene14856	LOC1060481531;LOC1060481533;LOC1060481532;LOC1060481535;LOC1060481537;NCAPH;LOC106045814;KIF17;LOC106045810;LOC106049626;LOC106049629;LOC106045823;LOC106045117;NCAPG;FBXO30;LOC106035790;LOC106048111;LOC106042035;ANXA8L15;LOC106045851;LOC106045128;RAG16
16	GO:0097746	BP	regulation of blood vessel diameter	16/ 2723	40/ 12028	0.4	0.012989	0.349073	gene4021;gene13258;gene4315;gene4930;gene11403;gene15729;gene9021;gene13257;gene6023;gene18170;gene17316;gene6749;gene7410;gene2925;gene7870;gene11550	ADRA2A;CXCL1258;EDNRA;HRH2;KIF20B03;ANXA8L129;AGTR2;CXCL1257;ARHGAP42;LOC106047519;EDN2;PTPRM;HTR1A;ITGB1BP1;AGTR1;NPPC
16	GO:0035150	BP	regulation of tube size	16/ 2723	40/ 12028	0.4	0.012989	0.349073	gene4021;gene13258;gene4315;gene4930;gene11403;gene15729;gene9021;gene13257;gene6023;gene18170;gene17316;gene6749;gene7410;gene2925;gene7870;gene11550	ADRA2A;CXCL1258;EDNRA;HRH2;KIF20B03;ANXA8L129;AGTR2;CXCL1257;ARHGAP42;LOC106047519;EDN2;PTPRM;HTR1A;ITGB1BP1;AGTR1;NPPC
16	GO:0035296	BP	regulation of tube diameter	16/ 2723	40/ 12028	0.4	0.012989	0.349073	gene4021;gene13258;gene4315;gene4930;gene11403;gene15729;gene9021;gene13257;gene6023;gene18170;gene17316;gene6749;gene7410;gene2925;gene7870;gene11550	ADRA2A;CXCL1258;EDNRA;HRH2;KIF20B03;ANXA8L129;AGTR2;CXCL1257;ARHGAP42;LOC106047519;EDN2;PTPRM;HTR1A;ITGB1BP1;AGTR1;NPPC
13	GO:0006959	BP	humoral immune response	13/ 2723	30/ 12028	0.433333	0.0137316	0.365417	gene20396;gene20397;gene11570;gene20665;gene18460;gene20308;gene1912;gene19609;gene20338;gene8002;gene14957;gene3922;gene19641	KCNIP2396;KCNIP2397;STK40;LOC106029527;NFKB260;LOC106049812;EXO1;LOC106049106;KCNIP2338;C7;JCHAIN;LOC106031806;LOC106049124
13	GO:0004715	MF	non-membrane spanning protein tyrosine kinase activity	13/ 2723	30/ 12028	0.433333	0.0137316	0.365417	gene18816;gene17105;gene15062;gene3005;gene9468;gene16484;gene17812;gene12165;gene9293;gene16004;gene10479;gene12197;gene9649	LOC106048210;BEST35;ABL1;ARHGAP1905;LCK;MATK;HCK;WEE1;BTK;SYK;LYN;SRC;BLK
30	GO:0004222	MF	metalloendopeptidase activity	30/ 2723	87/ 12028	0.344828	0.0137809	0.365417	gene17255;gene15586;gene2139;gene5643;gene14183;gene20720;gene6415;gene17850;gene11784;gene212;gene15354;gene14223;gene3293;gene3292;gene5290;gene4830;gene6012;gene6010;gene19384;gene6007;gene2327;gene4253;gene11912;gene5049;gene9370;gene11057;gene6006;gene6009;gene8639;gene9717	SPG7;MMEL1;LOC106029858;DNMBP43;MMP2;KCNIP2720;OSGEPL1;MMP9;LOC106040422;ADAM8;LOC106044415;LOC106043205;LOC106031105;LOC106031104;ENTPD790;ADAMTS2;EVC22;EVC20;ADAM28;LOC106034136;ADAM23;SLC5A10;ADAMTS8;TRABD2B;MBTPS2;ADAM22;EVC6;EVC9;ADAMTS1;LOC106038159
7	GO:0002312	BP	B cell activation involved in immune response	7/ 2723	13/ 12028	0.538462	0.0140747	0.367002	gene11359;gene18685;gene7614;gene1912;gene8984;gene14202;gene3922	HSPD1;AICDA;MFNG;EXO1;CD40LG;MSH2;LOC106031806
7	GO:0061097	BP	regulation of protein tyrosine kinase activity	7/ 2723	13/ 12028	0.538462	0.0140747	0.367002	gene4021;gene16763;gene17926;gene17925;gene18638;gene18301;gene12205	ADRA2A;ITGB3;SLC38A26;SLC38A25;VPS25;PRNP;SDC4
7	GO:1903038	BP	negative regulation of leukocyte cell-cell adhesion	7/ 2723	13/ 12028	0.538462	0.0140747	0.367002	gene14139;gene6988;gene3800;gene12495;gene2415;gene18301;gene15442	CBFB;CASP3;ARG2;PTPN22;GPNMB;PRNP;ANXA1
7	GO:1901570	BP	fatty acid derivative biosynthetic process	7/ 2723	13/ 12028	0.538462	0.0140747	0.367002	gene7393;gene19151;gene2647;gene17316;gene12380;gene5871;gene4834	ELOVL7;ELOVL4;HMGCLL1;EDN2;ALOX5AP;ELOVL1;LOC106032894
7	GO:0002755	BP	MyD88-dependent toll-like receptor signaling pathway	7/ 2723	13/ 12028	0.538462	0.0140747	0.367002	gene11359;gene20823;gene3700;gene10561;gene13649;gene4347;gene8347	HSPD1;LOC106029694;TLR5;LOC106039090;TLR7;LOC106032265;IRAK2
7	GO:0018149	BP	peptide cross-linking	7/ 2723	13/ 12028	0.538462	0.0140747	0.367002	gene17864;gene17863;gene8539;gene6683;gene13343;gene20518;gene15442	LOC106047160;LOC106047158;DCN;F13A1;LOC106042218;LOC106029373;ANXA1
18	GO:0065004	BP	protein-DNA complex assembly	18/ 2723	47/ 12028	0.382979	0.0140779	0.367002	gene7626;gene9299;gene19177;gene5678;gene9605;gene14477;gene1566;gene1565;gene9911;gene1570;gene17737;gene9675;gene3508;gene1581;gene20120;gene1585;gene6084;gene1587	LOC106035790;CENPI;KIF17;DNMBP78;MCM2;VSTM477;LOC106045814;LOC106045810;MCM4;LOC106045851;RAD51;MCM3;CABIN1;LOC1060481531;LOC106049629;LOC1060481535;FBXO30;LOC1060481537
25	GO:0004866	MF	endopeptidase inhibitor activity	25/ 2723	70/ 12028	0.357143	0.0139493	0.367002	gene4924;gene11984;gene11981;gene11906;gene18695;gene9578;gene20338;gene6331;gene3476;gene10548;gene13581;gene5733;gene11408;gene16864;gene17377;gene760;gene13507;gene15683;gene11327;gene2591;gene10080;gene18701;gene10225;gene10226;gene19513	LOC106032659;C5;PHF19;APLP2;LOC106048078;CEP5578;KCNIP2338;COL6A3;SERPIND1;LOC106039127;LOC106042465;SERPING1;TIMP4;HOPX;COL6A6;LOC106036374;SERPINH1;LOC1060451173;SERPINB5;PPRC191;XIAP;LOC106048083;ITIH5;ITIH2;LOC106048983
23	GO:0045785	BP	positive regulation of cell adhesion	23/ 2723	63/ 12028	0.365079	0.0145863	0.37779	gene11359;gene19671;gene15810;gene2407;gene1485;gene8030;gene15442;gene16763;gene10230;gene8984;gene11205;gene5943;gene421;gene937;gene1932;gene2925;gene19706;gene15768;gene14139;gene12495;gene4580;gene10220;gene2315	HSPD1;WNT4;LOC10604815310;IL6;RAG1;IL7R;ANXA1;ITGB3;GATA3;CD40LG;LOC106039769;CYR61;RET;COL8A1;KIF26B;ITGB1BP1;ECM2;CDH13;CBFB;PTPN22;CITED2;PRKCQ;LOC106030066
10	GO:2000241	BP	regulation of reproductive process	10/ 2723	21/ 12028	0.47619	0.0147089	0.37779	gene606;gene19671;gene1209;gene19150;gene15176;gene16499;gene4580;gene13699;gene16393;gene11109	MSX1;WNT4;SNAI1;TTK;LOC106044180;FZR1;CITED2;PHLDA2;AR;HSPA8
10	GO:0010951	BP	negative regulation of endopeptidase activity	10/ 2723	21/ 12028	0.47619	0.0147089	0.37779	gene11408;gene1485;gene7321;gene18522;gene10080;gene760;gene18317;gene3476;gene11327;gene19513	TIMP4;RAG1;HGF;SFN;XIAP;LOC106036374;SIAH2;SERPIND1;SERPINB5;LOC106048983
10	GO:0062207	BP	regulation of pattern recognition receptor signaling pathway	10/ 2723	21/ 12028	0.47619	0.0147089	0.37779	gene19689;gene12566;gene4565;gene12495;gene13257;gene18524;gene11888;gene14856;gene3889;gene10561	SARM1;RAB7B;TNFAIP3;PTPN22;CXCL1257;GPATCH3;TIRAP;RAG16;IRF7;LOC106039090
10	GO:0016525	BP	negative regulation of angiogenesis	10/ 2723	21/ 12028	0.47619	0.0147089	0.37779	gene9475;gene7326;gene3818;gene8539;gene9508;gene6749;gene8959;gene2925;gene15519;gene2613	LOC106037948;SEMA3E;THBS1;DCN;LOC106037927;PTPRM;TNMD;ITGB1BP1;THBS2;ADGRB3
10	GO:0010466	BP	negative regulation of peptidase activity	10/ 2723	21/ 12028	0.47619	0.0147089	0.37779	gene11408;gene1485;gene7321;gene18522;gene10080;gene760;gene18317;gene3476;gene11327;gene19513	TIMP4;RAG1;HGF;SFN;XIAP;LOC106036374;SIAH2;SERPIND1;SERPINB5;LOC106048983
10	GO:0002250	BP	adaptive immune response	10/ 2723	21/ 12028	0.47619	0.0147089	0.37779	gene3889;gene17801;gene11359;gene1485;gene1912;gene10682;gene12706;gene15751;gene14957;gene3922	IRF7;LOC106047112;HSPD1;RAG1;EXO1;KLHL6;ANKRD2206;BCL6;JCHAIN;LOC106031806
8	GO:0070661	BP	leukocyte proliferation	8/ 2723	16/ 12028	0.5	0.0150118	0.380189	gene16645;gene11359;gene1484;gene6216;gene8984;gene13257;gene8030;gene19671	CCND3;HSPD1;RAG2;DOCK2;CD40LG;CXCL1257;IL7R;WNT4
8	GO:0006270	BP	DNA replication initiation	8/ 2723	16/ 12028	0.5	0.0150118	0.380189	gene9675;gene9605;gene10737;gene16970;gene3455;gene9911;gene7585;gene7584	MCM3;MCM2;MCM6;MCM10;CDC45;MCM4;MCM5;HMOX1
8	GO:0050715	BP	positive regulation of cytokine secretion	8/ 2723	16/ 12028	0.5	0.0150118	0.380189	gene13258;gene11169;gene15729;gene12495;gene13257;gene3255;gene13411;gene11870	CXCL1258;IL18;ANXA8L129;PTPN22;CXCL1257;TRPV4;PTGR21;EYA20
8	GO:0035914	BP	skeletal muscle cell differentiation	8/ 2723	16/ 12028	0.5	0.0150118	0.380189	gene4693;gene10304;gene2532;gene4580;gene3742;gene6519;gene14207;gene2200	EGR1;FOS;PPRC132;CITED2;ATF3;HLF;FOXN2;KLHL41
8	GO:0046626	BP	regulation of insulin receptor signaling pathway	8/ 2723	16/ 12028	0.5	0.0150118	0.380189	gene16645;gene16281;gene8200;gene14022;gene10220;gene5505;gene7793;gene6420	CCND3;SLA2;GRB10;KANK1;PRKCQ;BAIAP2L1;SIK1;MSTN
8	GO:0002698	BP	negative regulation of immune effector process	8/ 2723	16/ 12028	0.5	0.0150118	0.380189	gene5733;gene20631;gene20630;gene18524;gene8030;gene15751;gene15442;gene11205	SERPING1;KCNIP2631;KCNIP2630;GPATCH3;IL7R;BCL6;ANXA1;LOC106039769
8	GO:0008630	BP	intrinsic apoptotic signaling pathway in response to DNA damage	8/ 2723	16/ 12028	0.5	0.0150118	0.380189	gene12767;gene18522;gene5598;gene19697;gene15756;gene14202;gene5370;gene138	CRIP1;SFN;LOC106033662;HIC1;ANXA8L156;MSH2;CDIP1;ERCC6
55	GO:0000977	MF	RNA polymerase II transcription regulatory region sequence-specific DNA binding	55/ 2723	180/ 12028	0.305556	0.0150207	0.380189	gene4693;gene606;gene10385;gene11254;gene4965;gene10230;gene16502;gene8156;gene6519;gene3889;gene11901;gene5173;gene18979;gene7498;gene4308;gene1463;gene2447;gene4032;gene4653;gene9431;gene9948;gene20004;gene7874;gene2265;gene2088;gene10560;gene15751;gene16994;gene9508;gene2532;gene10138;gene1439;gene7661;gene16393;gene2519;gene20193;gene8380;gene4724;gene6215;gene16925;gene12816;gene18801;gene83…	EGR1;MSX1;KLF6;EED;JUN;GATA3;MARCH802;MEF2A;HLF;IRF7;BARX2;E2F4;RFX2;ZBED1;ZNF827;ALX4;HOXA2;TCF7L2;PRDM1;MYCL;MYC;LOC106049496;LOC106036167;PAPSS25;TFCP2L1;KLF3;BCL6;PRDM6;LOC106037927;PPRC132;SLC35G138;LOC1060464399;ATF4;AR;RARB;LOC106049694;BHLHE40;NR3C1;FOXI1;PPARD;LOC106041556;LOC106048219;BCL11A;SNAI1;IRF8;FOS;KAT2B;RBPJ;MEF2C;HHEX;ATF3;ETV1;RAG16;STAT4;CREB3L1
25	GO:0061135	MF	endopeptidase regulator activity	25/ 2723	71/ 12028	0.352113	0.0150901	0.381252	gene4924;gene11984;gene11981;gene11906;gene18695;gene9578;gene20338;gene6331;gene3476;gene10548;gene13581;gene5733;gene11408;gene16864;gene17377;gene760;gene13507;gene15683;gene11327;gene2591;gene10080;gene18701;gene10225;gene10226;gene19513	LOC106032659;C5;PHF19;APLP2;LOC106048078;CEP5578;KCNIP2338;COL6A3;SERPIND1;LOC106039127;LOC106042465;SERPING1;TIMP4;HOPX;COL6A6;LOC106036374;SERPINH1;LOC1060451173;SERPINB5;PPRC191;XIAP;LOC106048083;ITIH5;ITIH2;LOC106048983
15	GO:0030098	BP	lymphocyte differentiation	15/ 2723	37/ 12028	0.405405	0.0162171	0.408697	gene14139;gene4693;gene14367;gene1484;gene1485;gene7614;gene2532;gene8984;gene12495;gene1439;gene8030;gene15751;gene15442;gene14202;gene3922	CBFB;EGR1;LOC10604643967;RAG2;RAG1;MFNG;PPRC132;CD40LG;PTPN22;LOC1060464399;IL7R;BCL6;ANXA1;MSH2;LOC106031806
19	GO:0098802	CC	plasma membrane signaling receptor complex	19/ 2723	50/ 12028	0.38	0.0162352	0.408697	gene17686;gene3937;gene12268;gene12427;gene16763;gene17608;gene20236;gene9571;gene2407;gene16356;gene2296;gene10578;gene11771;gene3669;gene14089;gene7691;gene16004;gene2150;gene2370	TRAF3;ITGBL1;ACVR2A;GRIN2A;ITGB3;CD79B;KCNIP2236;ABHD6;IL6;ITGA9;ITGA4;CHRNA9;CHRNB3;TRAF5;GRIN3A;GABBR2;SYK;ITGB6;ITGB2
13	GO:0008360	BP	regulation of cell shape	13/ 2723	31/ 12028	0.419355	0.0163099	0.409837	gene15613;gene7326;gene15988;gene17622;gene14118;gene1394;gene19614;gene9772;gene6427;gene3332;gene752;gene16015;gene15442	RHOB;SEMA3E;LOC106045044;FMNL1;LPAR1;RHOV;PALM;PARVB;CDC42EP4;RHOF;SYNE3;CDC42SE2;ANXA1
28	GO:0010639	BP	negative regulation of organelle organization	28/ 2723	82/ 12028	0.341463	0.0166364	0.41579	gene11987;gene10720;gene8973;gene13398;gene4952;gene1961;gene1007;gene13411;gene9552;gene7321;gene6218;gene19150;gene14022;gene5593;gene12772;gene2738;gene10811;gene3617;gene3673;gene3979;gene17757;gene18685;gene9605;gene2495;gene11883;gene13658;gene1439;gene18354	GSN;OPA1;FGF13;BUB1;LOC1060339722;FEZ2;PHLDB2;PTGR21;CEP5552;HGF;LOC10603787018;TTK;KANK1;LOC106033657;SEC22B;TMEM67;LOC106039322;PLEKHH2;NEK2;CDHR19;BUB1B;AICDA;MCM2;KAT2B;CHEK1;ARHGAP6;LOC1060464399;LIMA1
28	GO:0004725	MF	protein tyrosine phosphatase activity	28/ 2723	82/ 12028	0.341463	0.0166364	0.41579	gene12412;gene3709;gene3052;gene822;gene6749;gene12304;gene17512;gene3097;gene15039;gene1214;gene1187;gene16625;gene4014;gene16955;gene16957;gene13689;gene15479;gene13729;gene19334;gene15263;gene17807;gene18007;gene16861;gene12495;gene13131;gene455;gene13852;gene18465	LOC106041201;DUSP10;ARHGAP1952;PTPN21;PTPRM;MTMR4;CDC25A;ARHGAP1997;CDKN3;PTPN1;EYA2;SYT15;DUSP5;LOC106046186;LOC106046179;PTPN5;PTPRZ1;DUSP8;DUSP3;LOC106044308;DUSP15;CDC14B;DUSP4;PTPN22;PTPRC;LOC106033034;DUSP1;NFKB265
26	GO:0030414	MF	peptidase inhibitor activity	26/ 2723	74/ 12028	0.351351	0.0168241	0.419727	gene4924;gene11984;gene11981;gene11906;gene18695;gene9578;gene20338;gene6331;gene3476;gene10548;gene13581;gene5733;gene11408;gene16864;gene17377;gene11832;gene760;gene13507;gene15683;gene11327;gene2591;gene10080;gene18701;gene10225;gene10226;gene19513	LOC106032659;C5;PHF19;APLP2;LOC106048078;CEP5578;KCNIP2338;COL6A3;SERPIND1;LOC106039127;LOC106042465;SERPING1;TIMP4;HOPX;COL6A6;ANOS1;LOC106036374;SERPINH1;LOC1060451173;SERPINB5;PPRC191;XIAP;LOC106048083;ITIH5;ITIH2;LOC106048983
149	GO:0140110	MF	transcription regulator activity	149/ 2723	555/ 12028	0.268468	0.0168675	0.420057	gene2447;gene2078;gene3603;gene3889;gene11901;gene5173;gene7713;gene1463;gene4653;gene8358;gene4919;gene13125;gene12527;gene700;gene11124;gene19016;gene10918;gene12816;gene4965;gene4080;gene8380;gene1074;gene4724;gene14493;gene12815;gene1172;gene8314;gene18862;gene9404;gene5536;gene1671;gene5871;gene12723;gene2464;gene3054;gene2746;gene3742;gene15653;gene14058;gene6519;gene16365;gene17183;gene205…	HOXA2;KCNIP278;TBX3;IRF7;BARX2;E2F4;NR4A3;ALX4;PRDM1;LMCD1;EBF1;NR5A2;IRF6;RBPJ;LOC106039709;LOC10602987816;T;LOC106041556;JUN;MECOM;BHLHE40;BCL9;NR3C1;BACH1;RXRG;HNF4A;BCL11A;MYRF;RUNX3;MAFK;E2F7;ELOVL1;ANKRD2223;CREB5;ARHGAP1954;RUNX1T1;ATF3;LOC1060458103;TBX22;HLF;MED13L;CPM3;FOSL2;RFX2;FOXO3;PASD1;FOXI1;OTX1;TCF7L2;TSC22D2;GRHL3;LOC106037040;LOC106049496;LOC106036167;NR4A2;PAPSS25;PAX1;ANXA77…
5	GO:0050871	BP	positive regulation of B cell activation	5/ 2723	8/ 12028	0.625	0.0178353	0.437892	gene3922;gene15810;gene15751;gene2407;gene14202	LOC106031806;LOC10604815310;BCL6;IL6;MSH2
5	GO:0046631	BP	alpha-beta T cell activation	5/ 2723	8/ 12028	0.625	0.0178353	0.437892	gene15442;gene3922;gene2532;gene11169;gene6216	ANXA1;LOC106031806;PPRC132;IL18;DOCK2
5	GO:0006026	BP	aminoglycan catabolic process	5/ 2723	8/ 12028	0.625	0.0178353	0.437892	gene17463;gene11773;gene15435;gene1716;gene7438	ENGASE;IDUA;TMEM2;LYZ;LOC106035746
5	GO:0006027	BP	glycosaminoglycan catabolic process	5/ 2723	8/ 12028	0.625	0.0178353	0.437892	gene17463;gene11773;gene15435;gene1716;gene7438	ENGASE;IDUA;TMEM2;LYZ;LOC106035746
5	GO:0006958	BP	complement activation, classical pathway	5/ 2723	8/ 12028	0.625	0.0178353	0.437892	gene20396;gene20397;gene20665;gene20308;gene18460	KCNIP2396;KCNIP2397;LOC106029527;LOC106049812;NFKB260
5	GO:0016447	BP	somatic recombination of immunoglobulin gene segments	5/ 2723	8/ 12028	0.625	0.0178353	0.437892	gene1912;gene14202;gene8984;gene11359;gene18685	EXO1;MSH2;CD40LG;HSPD1;AICDA
5	GO:0090303	BP	positive regulation of wound healing	5/ 2723	8/ 12028	0.625	0.0178353	0.437892	gene4021;gene13258;gene15442;gene14022;gene9706	ADRA2A;CXCL1258;ANXA1;KANK1;ENPP4
248	GO:0003677	MF	DNA binding	248/ 2723	963/ 12028	0.257529	0.0178153	0.437892	gene11583;gene4965;gene2078;gene5536;gene7568;gene3603;gene1581;gene1583;gene1582;gene1585;gene1587;gene5173;gene7713;gene14249;gene1463;gene1565;gene9572;gene15635;gene19016;gene4919;gene9091;gene13125;gene16970;gene12527;gene4911;gene2088;gene11124;gene13310;gene16994;gene16335;gene10918;gene1172;gene7661;gene8314;gene20120;gene2826;gene8380;gene4724;gene7706;gene12815;gene12816;gene20460;gene1…	XPA;JUN;KCNIP278;MAFK;GSC8;TBX3;LOC1060481531;LOC1060481533;LOC1060481532;LOC1060481535;LOC1060481537;E2F4;NR4A3;LOC106043214;ALX4;LOC106045810;DNASE1L3;MEIS1;LOC10602987816;EBF1;DLX5;NR5A2;MCM10;IRF6;SOX30;TFCP2L1;LOC106039709;TOP1MT;PRDM6;NOBOX;T;HNF4A;ATF4;BCL11A;LOC106049629;ZFHX4;BHLHE40;NR3C1;MSANTD3;RXRG;LOC106041556;KCNIP2460;BACH1;EEPD1;TGIF1;MYRF;HMGB2;ANXA8L15;LOC106045851;LOC106045128…
46	GO:0043207	BP	response to external biotic stimulus	46/ 2723	149/ 12028	0.308725	0.0180702	0.441326	gene12661;gene20548;gene777;gene4965;gene2407;gene4367;gene7438;gene2836;gene3889;gene9552;gene16286;gene1484;gene17830;gene13927;gene20778;gene9727;gene13649;gene3860;gene3796;gene19767;gene19641;gene10561;gene17686;gene13258;gene11570;gene11888;gene20823;gene19609;gene13257;gene3700;gene1716;gene20213;gene18293;gene4347;gene18685;gene6988;gene19459;gene20308;gene15783;gene2596;gene12946;gene149…	HSPB1;LOC106029404;CHGA;JUN;IL6;GUCY1A3;LOC106035746;LY96;IRF7;CEP5552;SAMHD1;RAG2;LOC106047130;LOC106042804;KCNIP2778;KCNJ8;TLR7;COCH;TMEM229B;IRF8;LOC106049124;LOC106039090;TRAF3;CXCL1258;STK40;TIRAP;LOC106029694;LOC106049106;CXCL1257;TLR5;LYZ;IL1B;GKN2;LOC106032265;AICDA;CASP3;IRF5;LOC106049812;COTL1;PPRC196;HMGB2;JCHAIN;PRKD1;RAG16;ANKRD2247;PTPN218
543	GO:0005515	MF	protein binding	543/ 2723	2211/ 12028	0.24559	0.0181317	0.442052	gene8973;gene18995;gene10067;gene15810;gene19492;gene5700;gene7568;gene5173;gene16702;gene9470;gene16708;gene4855;gene9570;gene1394;gene17316;gene4796;gene16994;gene17468;gene4973;gene16999;gene18638;gene7829;gene11205;gene10060;gene1074;gene4724;gene9790;gene7519;gene20308;gene20224;gene12788;gene12662;gene12661;gene2468;gene18522;gene6673;gene8154;gene8156;gene6455;gene11169;gene2955;gene5520;g…	FGF13;CSF1;LOC106038552;LOC10604815310;SEMA4A;TLN2;GSC8;E2F4;IGFBP2;MARCKSL1;PECR;CD74;CEP5570;RHOV;EDN2;TGFBI;PRDM6;CYTH1;PRKAA2;SNCAIP;VPS25;DSCAM;LOC106039769;IRS4;BCL9;NR3C1;FBLN1;IGF1;LOC106049812;PPIH;LOC106041570;YWHAG;HSPB1;WIPF3;SFN;DSP;SYNM;MEF2A;GNA13;IL18;TRIB2;PRKAR1B;MYO1F;NRAP;TCF7L2;LOC106049496;INHBA;SYNE3;MMACHC;SPIRE2;IFT81;CPE;KCNIP2631;KCNIP2630;ANXA8L129;VILL;LOC106029917;CX…
61	GO:0051241	BP	negative regulation of multicellular organismal process	61/ 2723	206/ 12028	0.296117	0.018572	0.451994	gene8973;gene13258;gene11436;gene10690;gene18524;gene14022;gene15751;gene15756;gene4367;gene19382;gene15442;gene3187;gene19671;gene2613;gene1335;gene10982;gene13515;gene9475;gene7326;gene6420;gene7321;gene12205;gene3800;gene14419;gene9571;gene1209;gene17281;gene18301;gene11205;gene13482;gene13942;gene15122;gene10561;gene11630;gene15187;gene16576;gene9508;gene4565;gene5716;gene16336;gene13257;gene…	FGF13;CXCL1258;WNT7A;GPC1;GPATCH3;KANK1;BCL6;ANXA8L156;GUCY1A3;STC1;ANXA1;PTN;WNT4;ADGRB3;LOC106040700;CBLN1;WNT11;LOC106037948;SEMA3E;MSTN;HGF;SDC4;ARG2;HOMER2;ABHD6;SNAI1;SCD81;PRNP;LOC106039769;KCNE3;RHOV2;LOC106044084;LOC106039090;ITM2C;SEMA7A;MARCH876;LOC106037927;TNFAIP3;CPN116;CD9;CXCL1257;WNT2B;GPNMB;ITGB1BP1;THBS2;RARB;ADORA2B;PTPRM;THBS1;CBFB;SOST;LOC106041556;TRIB2;DCN;RGMA;IL1R2;LPAR1…
32	GO:1902903	BP	regulation of supramolecular fiber organization	32/ 2723	96/ 12028	0.333333	0.019183	0.460425	gene11987;gene8973;gene4209;gene12024;gene5505;gene19671;gene1007;gene13411;gene13515;gene9552;gene12800;gene17622;gene14022;gene5162;gene13238;gene17645;gene11205;gene11109;gene17263;gene5593;gene4952;gene13257;gene10811;gene3617;gene5146;gene2925;gene6427;gene12312;gene14118;gene6149;gene13658;gene18354	GSN;FGF13;LOC106032083;LOC106040731;BAIAP2L1;WNT4;PHLDB2;PTGR21;WNT11;CEP5552;MYOC;FMNL1;KANK1;RLTPR;CXCL1238;ACTR3B;LOC106039769;HSPA8;SPIRE2;LOC106033657;LOC1060339722;CXCL1257;LOC106039322;PLEKHH2;HSD11B2;ITGB1BP1;CDC42EP4;LIMK1;LPAR1;SNX9;ARHGAP6;LIMA1
51	GO:0051336	BP	regulation of hydrolase activity	51/ 2723	168/ 12028	0.303571	0.0199655	0.471551	gene19498;gene11359;gene19671;gene11327;gene18522;gene2925;gene16236;gene15988;gene16111;gene15442;gene14202;gene12205;gene12028;gene13559;gene1485;gene7321;gene19119;gene16250;gene18302;gene11205;gene17406;gene13515;gene12638;gene5943;gene20438;gene13258;gene11408;gene8682;gene3557;gene3558;gene15729;gene13257;gene760;gene12254;gene3476;gene18317;gene11855;gene8056;gene9605;gene16473;gene14118;g…	LOC106048962;HSPD1;WNT4;SERPINB5;SFN;ITGB1BP1;DAPK1;LOC106045044;RAB11FIP2;ANXA1;MSH2;SDC4;GAPVD1;SPRY1;RAG1;HGF;RHOG;NTRK2;PROM2;LOC106039769;TBC1D9;WNT11;LOC106041491;CYR61;VCPKMT;CXCL1258;TIMP4;TNFSF15;LOC106031353;LOC106031351;ANXA8L129;CXCL1257;LOC106036374;ARHGAP15;SERPIND1;SIAH2;SLC2A105;PMAIP1;MCM2;ANGPTL4;LPAR1;XIAP;CYFIP2;ANXA8L156;BCL6;LOC106048595;ARHGAP42;HSPA2;SNX9;NDEL1;LOC106048983
13	GO:0006334	BP	nucleosome assembly	13/ 2723	32/ 12028	0.40625	0.0199815	0.471551	gene7626;gene19177;gene9605;gene14477;gene1566;gene1565;gene1570;gene3508;gene1581;gene20120;gene1585;gene6084;gene1587	LOC106035790;KIF17;MCM2;VSTM477;LOC106045814;LOC106045810;LOC106045851;CABIN1;LOC1060481531;LOC106049629;LOC1060481535;FBXO30;LOC1060481537
13	GO:1902850	BP	microtubule cytoskeleton organization involved in mitosis	13/ 2723	32/ 12028	0.40625	0.0199815	0.471551	gene2690;gene9552;gene1261;gene18427;gene6723;gene10399;gene1382;gene2190;gene6218;gene3673;gene12315;gene86;gene13559	ARHGEF10;CEP5552;AURKA;NFKB227;NDC80;LOC106039004;NUSAP1;SPC25;LOC10603787018;NEK2;SBDS;KIF11;SPRY1
22	GO:0016054	BP	organic acid catabolic process	22/ 2723	61/ 12028	0.360656	0.020053	0.471551	gene17125;gene7215;gene7523;gene18932;gene18134;gene8560;gene11773;gene5942;gene5718;gene7627;gene652;gene3637;gene5309;gene15435;gene5068;gene8482;gene20429;gene19149;gene4620;gene16925;gene12624;gene576	GLDC;ACOX2;SYNE33;HSD17B4;LOC106047481;AMDHD1;IDUA;DDAH1;CPN118;GCAT;QDPR;HAAO;GCSH;TMEM2;LOC106033086;PLA1A2;KCNIP2429;BCKDHB;DDO;PPARD;GUSB;ACOX3
22	GO:0046395	BP	carboxylic acid catabolic process	22/ 2723	61/ 12028	0.360656	0.020053	0.471551	gene17125;gene7215;gene7523;gene18932;gene18134;gene8560;gene11773;gene5942;gene5718;gene7627;gene652;gene3637;gene5309;gene15435;gene5068;gene8482;gene20429;gene19149;gene4620;gene16925;gene12624;gene576	GLDC;ACOX2;SYNE33;HSD17B4;LOC106047481;AMDHD1;IDUA;DDAH1;CPN118;GCAT;QDPR;HAAO;GCSH;TMEM2;LOC106033086;PLA1A2;KCNIP2429;BCKDHB;DDO;PPARD;GUSB;ACOX3
94	GO:0030154	BP	cell differentiation	94/ 2723	336/ 12028	0.279762	0.0205275	0.478665	gene14367;gene18995;gene11197;gene3922;gene11901;gene9570;gene1668;gene1662;gene16994;gene16576;gene19911;gene1172;gene13257;gene11699;gene12816;gene4642;gene5338;gene9923;gene12495;gene9649;gene12268;gene17105;gene3742;gene6519;gene20084;gene10982;gene1484;gene6215;gene4032;gene13629;gene12773;gene2120;gene16499;gene14856;gene17780;gene16353;gene2519;gene3739;gene14139;gene349;gene1209;gene2590;…	LOC10604643967;CSF1;DSCAML1;LOC106031806;BARX2;CEP5570;NAV3;SYT1;PRDM6;MARCH876;SDK2;HNF4A;CXCL1257;FGF9;LOC106041556;OSTM1;LOC1060333288;LOC106038386;PTPN22;BLK;ACVR2A;BEST35;ATF3;HLF;COL2A1;CBLN1;RAG2;FOXI1;TCF7L2;SOAT1;NOTCH2;ADAM80;FZR1;RAG16;FN3K;NEUROD6;RARB;FLVCR1;CBFB;CDK1;SNAI1;COL12A1;LOC106030669;WNT3A;ACKR3;ITGB2;EGR1;MSX1;IL7R;MSH2;FOXN2;ELL3;MFNG;JMJD6;WNT10A;LOC106048011;KLHL41;PPR…
71	GO:0051094	BP	positive regulation of developmental process	71/ 2723	246/ 12028	0.288618	0.0208634	0.485684	gene15613;gene12268;gene3187;gene13579;gene18995;gene18522;gene15810;gene19633;gene10690;gene4965;gene2407;gene1485;gene8030;gene15988;gene15756;gene15442;gene14202;gene19671;gene1007;gene15187;gene10982;gene13559;gene1484;gene12661;gene5563;gene12195;gene3800;gene1789;gene10230;gene8753;gene11436;gene11205;gene645;gene5943;gene8613;gene8803;gene16801;gene12566;gene4565;gene8439;gene421;gene12509…	RHOB;ACVR2A;PTN;BRINP3;CSF1;SFN;LOC10604815310;S100A1;GPC1;JUN;IL6;RAG1;IL7R;LOC106045044;ANXA8L156;ANXA1;MSH2;WNT4;PHLDB2;SEMA7A;CBLN1;SPRY1;RAG2;HSPB1;FGF7;LOC106040927;ARG2;AMIGO2;GATA3;LOC106037140;WNT7A;LOC106039769;FGFBP1;CYR61;CHODL;PRKCH;PRKCB;RAB7B;TNFAIP3;WNT3A;RET;WNT2B;BMP5;NTRK2;ATF4;SLC8A1;FGF9;WNT6;AR;BOC;LIMK1;ITGB3;CBFB;PPARD;DCN;LOC1060333288;SNAI1;HOPX;FOS;FNDC5;GDPD2;PPRC196;C…
20	GO:0019199	MF	transmembrane receptor protein kinase activity	20/ 2723	54/ 12028	0.37037	0.0209657	0.487252	gene1040;gene15854;gene12268;gene18452;gene530;gene8107;gene19317;gene2120;gene20236;gene12357;gene421;gene3030;gene20014;gene16250;gene8503;gene9536;gene11465;gene15359;gene14887;gene19272	EPHA6;INSR;ACVR2A;NFKB252;FGFR3;NTRK3;MST1R;ADAM80;KCNIP2236;FLT3;RET;ARHGAP1930;FGFR4;NTRK2;ACVR2B;CEP5536;KIF20B65;FGFR1;ACVR1C;EPHB6
6	GO:0032677	BP	regulation of interleukin-8 production	6/ 2723	11/ 12028	0.545455	0.0213658	0.488397	gene13258;gene12495;gene13257;gene11888;gene15442;gene10561	CXCL1258;PTPN22;CXCL1257;TIRAP;ANXA1;LOC106039090
6	GO:1900046	BP	regulation of hemostasis	6/ 2723	11/ 12028	0.545455	0.0213658	0.488397	gene5733;gene13258;gene16336;gene13257;gene10220;gene9706	SERPING1;CXCL1258;CD9;CXCL1257;PRKCQ;ENPP4
6	GO:0071675	BP	regulation of mononuclear cell migration	6/ 2723	11/ 12028	0.545455	0.0213658	0.488397	gene3255;gene9869;gene11494;gene9870;gene9713;gene6420	TRPV4;LOC106038356;KIF20B94;LOC106038357;PLA2G7;MSTN
6	GO:0045833	BP	negative regulation of lipid metabolic process	6/ 2723	11/ 12028	0.545455	0.0213658	0.488397	gene4021;gene19671;gene1209;gene2646;gene6416;gene20183	ADRA2A;WNT4;SNAI1;BMP5;ORMDL1;ORMDL3
6	GO:0006690	BP	icosanoid metabolic process	6/ 2723	11/ 12028	0.545455	0.0213658	0.488397	gene1341;gene4834;gene4837;gene17316;gene5990;gene12380	PTGR2;LOC106032894;LOC106032815;EDN2;PTGS2;ALOX5AP
6	GO:0050853	BP	B cell receptor signaling pathway	6/ 2723	11/ 12028	0.545455	0.0213658	0.488397	gene17608;gene10682;gene14127;gene16801;gene16004;gene9649	CD79B;KLHL6;BCAR1;PRKCB;SYK;BLK
6	GO:0030193	BP	regulation of blood coagulation	6/ 2723	11/ 12028	0.545455	0.0213658	0.488397	gene5733;gene13258;gene16336;gene13257;gene10220;gene9706	SERPING1;CXCL1258;CD9;CXCL1257;PRKCQ;ENPP4
6	GO:0042149	BP	cellular response to glucose starvation	6/ 2723	11/ 12028	0.545455	0.0213658	0.488397	gene4973;gene12580;gene7661;gene9085;gene7983;gene7793	PRKAA2;NUAK2;ATF4;ASNS;NIM1K;SIK1
6	GO:0005003	MF	ephrin receptor activity	6/ 2723	11/ 12028	0.545455	0.0213658	0.488397	gene1040;gene18452;gene16250;gene19272;gene9536;gene11465	EPHA6;NFKB252;NTRK2;EPHB6;CEP5536;KIF20B65
6	GO:0004364	MF	glutathione transferase activity	6/ 2723	11/ 12028	0.545455	0.0213658	0.488397	gene2668;gene2665;gene2666;gene4834;gene12380;gene3090	LOC106030437;LOC106030435;LOC106030436;LOC106032894;ALOX5AP;ARHGAP1990
72	GO:1990837	MF	sequence-specific double-stranded DNA binding	72/ 2723	250/ 12028	0.288	0.0217865	0.494762	gene4693;gene2447;gene10385;gene12767;gene11254;gene4965;gene10230;gene2078;gene3742;gene15756;gene7585;gene2495;gene14202;gene3889;gene11901;gene5173;gene18979;gene18210;gene7498;gene4308;gene13515;gene606;gene4032;gene10093;gene9911;gene9431;gene9948;gene20004;gene7874;gene9675;gene19197;gene2265;gene2088;gene10560;gene15751;gene16994;gene8156;gene4653;gene9508;gene2532;gene10138;gene17689;gene…	EGR1;HOXA2;KLF6;CRIP1;EED;JUN;GATA3;KCNIP278;ATF3;ANXA8L156;MCM5;KAT2B;MSH2;IRF7;BARX2;E2F4;RFX2;MEF2C;ZBED1;ZNF827;WNT11;MSX1;TCF7L2;LOC106038686;MCM4;MYCL;MYC;LOC106049496;LOC106036167;MCM3;ELL3;PAPSS25;TFCP2L1;KLF3;BCL6;PRDM6;MEF2A;PRDM1;LOC106037927;PPRC132;SLC35G138;RCOR1;LOC1060464399;CENPC;ATF4;STAT4;AR;IRF5;RARB;LOC106049694;BHLHE40;NR3C1;FOXI1;PPARD;LOC106041556;IRF6;LOC106048219;BCL11A;…
27	GO:0061134	MF	peptidase regulator activity	27/ 2723	80/ 12028	0.3375	0.0221295	0.501733	gene4924;gene11984;gene11981;gene11906;gene18695;gene9578;gene20338;gene6331;gene3476;gene10548;gene13581;gene5733;gene11408;gene16864;gene17377;gene11832;gene760;gene13507;gene15683;gene9790;gene11327;gene2591;gene10080;gene18701;gene10225;gene10226;gene19513	LOC106032659;C5;PHF19;APLP2;LOC106048078;CEP5578;KCNIP2338;COL6A3;SERPIND1;LOC106039127;LOC106042465;SERPING1;TIMP4;HOPX;COL6A6;ANOS1;LOC106036374;SERPINH1;LOC1060451173;FBLN1;SERPINB5;PPRC191;XIAP;LOC106048083;ITIH5;ITIH2;LOC106048983
36	GO:0008283	BP	cell population proliferation	36/ 2723	112/ 12028	0.321429	0.0225538	0.508646	gene606;gene11359;gene19671;gene4796;gene12301;gene8030;gene12268;gene15756;gene7410;gene16645;gene1484;gene7321;gene5563;gene14022;gene8984;gene9513;gene11436;gene11205;gene937;gene15768;gene19382;gene15997;gene10138;gene13257;gene12509;gene2925;gene349;gene12315;gene6420;gene16925;gene18801;gene6216;gene12596;gene12942;gene17041;gene6346	MSX1;HSPD1;WNT4;TGFBI;RNF43;IL7R;ACVR2A;ANXA8L156;HTR1A;CCND3;RAG2;HGF;FGF7;KANK1;CD40LG;CEP5513;WNT7A;LOC106039769;COL8A1;CDH13;STC1;CKS2;SLC35G138;CXCL1257;WNT2B;ITGB1BP1;CDK1;SBDS;MSTN;PPARD;LOC106048219;DOCK2;STAMBPL196;SCRG1;LOC106046290;FN1
16	GO:1903037	BP	regulation of leukocyte cell-cell adhesion	16/ 2723	41/ 12028	0.390244	0.0226907	0.508646	gene6988;gene14139;gene11359;gene1485;gene15810;gene3800;gene8984;gene2407;gene10230;gene10220;gene8030;gene2415;gene18301;gene15442;gene12495;gene2315	CASP3;CBFB;HSPD1;RAG1;LOC10604815310;ARG2;CD40LG;IL6;GATA3;PRKCQ;IL7R;GPNMB;PRNP;ANXA1;PTPN22;LOC106030066
16	GO:0051480	BP	regulation of cytosolic calcium ion concentration	16/ 2723	41/ 12028	0.390244	0.0226907	0.508646	gene13258;gene14055;gene14052;gene14053;gene14118;gene15729;gene13572;gene5713;gene2105;gene17316;gene20364;gene12427;gene7870;gene13257;gene3255;gene10578	CXCL1258;GPR174;LPAR4;LOC106042993;LPAR1;ANXA8L129;TRPC3;CIB2;ADCY5;EDN2;MOCS14;GRIN2A;AGTR1;CXCL1257;TRPV4;CHRNA9
7	GO:0046651	BP	lymphocyte proliferation	7/ 2723	14/ 12028	0.5	0.0227267	0.508646	gene16645;gene11359;gene1484;gene6216;gene8984;gene8030;gene19671	CCND3;HSPD1;RAG2;DOCK2;CD40LG;IL7R;WNT4
7	GO:0001755	BP	neural crest cell migration	7/ 2723	14/ 12028	0.5	0.0227267	0.508646	gene15187;gene15783;gene15729;gene10138;gene421;gene13942;gene12723	SEMA7A;COTL1;ANXA8L129;SLC35G138;RET;RHOV2;ANKRD2223
7	GO:0048641	BP	regulation of skeletal muscle tissue development	7/ 2723	14/ 12028	0.5	0.0227267	0.508646	gene19671;gene7321;gene10690;gene2200;gene12205;gene12904;gene6420	WNT4;HGF;GPC1;KLHL41;SDC4;RBM24;MSTN
7	GO:0032943	BP	mononuclear cell proliferation	7/ 2723	14/ 12028	0.5	0.0227267	0.508646	gene16645;gene11359;gene1484;gene6216;gene8984;gene8030;gene19671	CCND3;HSPD1;RAG2;DOCK2;CD40LG;IL7R;WNT4
7	GO:0030291	MF	protein serine/threonine kinase inhibitor activity	7/ 2723	14/ 12028	0.5	0.0227267	0.508646	gene6988;gene2495;gene12661;gene5520;gene1168;gene5032;gene2822	CASP3;KAT2B;HSPB1;PRKAR1B;PKIG;CDKN2C;PKIA
9	GO:0002695	BP	negative regulation of leukocyte activation	9/ 2723	19/ 12028	0.473684	0.0227917	0.509283	gene14139;gene6988;gene4565;gene3800;gene15751;gene12495;gene2415;gene18301;gene15442	CBFB;CASP3;TNFAIP3;ARG2;BCL6;PTPN22;GPNMB;PRNP;ANXA1
42	GO:0008237	MF	metallopeptidase activity	42/ 2723	136/ 12028	0.308824	0.0234743	0.523696	gene17255;gene15586;gene10169;gene2139;gene5643;gene14183;gene20720;gene6415;gene17850;gene11784;gene212;gene15354;gene14223;gene3293;gene3292;gene18015;gene5290;gene20694;gene6070;gene4830;gene20693;gene6012;gene6010;gene4424;gene6007;gene2327;gene10171;gene19480;gene6006;gene4253;gene11912;gene5049;gene19384;gene14255;gene9370;gene1718;gene4179;gene11057;gene57;gene6009;gene8639;gene9717	SPG7;MMEL1;LOC106038763;LOC106029858;DNMBP43;MMP2;KCNIP2720;OSGEPL1;MMP9;LOC106040422;ADAM8;LOC106044415;LOC106043205;LOC106031105;LOC106031104;LOC106047346;ENTPD790;LOC106029558;LOC106034162;ADAMTS2;LOC106029557;EVC22;EVC20;CPE;LOC106034136;ADAM23;LOC106038694;METAP1;EVC6;SLC5A10;ADAMTS8;TRABD2B;ADAM28;CPXM1;MBTPS2;CPM;AMZ1;ADAM22;CPN1;EVC9;ADAMTS1;LOC106038159
14	GO:0004867	MF	serine-type endopeptidase inhibitor activity	14/ 2723	35/ 12028	0.4	0.0235975	0.525601	gene4924;gene5733;gene9578;gene17377;gene16864;gene10226;gene760;gene10225;gene6331;gene3476;gene11906;gene11327;gene13507;gene19513	LOC106032659;SERPING1;CEP5578;COL6A6;HOPX;ITIH2;LOC106036374;ITIH5;COL6A3;SERPIND1;APLP2;SERPINB5;SERPINH1;LOC106048983
10	GO:0050817	BP	coagulation	10/ 2723	23/ 12028	0.434783	0.0238676	0.527399	gene13258;gene913;gene7491;gene13257;gene14465;gene1800;gene10862;gene19934;gene3476;gene20064	CXCL1258;F5;P2RY8;CXCL1257;IL10RB;ANO6;F3;LOC106049424;SERPIND1;KCNIP2064
10	GO:0007266	BP	Rho protein signal transduction	10/ 2723	23/ 12028	0.434783	0.0238676	0.527399	gene15613;gene15856;gene6455;gene7610;gene1394;gene3332;gene15751;gene6427;gene19119;gene15768	RHOB;MYO9B;GNA13;RAC2;RHOV;RHOF;BCL6;CDC42EP4;RHOG;CDH13
10	GO:2001236	BP	regulation of extrinsic apoptotic signaling pathway	10/ 2723	23/ 12028	0.434783	0.0238676	0.527399	gene11630;gene7321;gene4565;gene9991;gene4032;gene18317;gene3742;gene16393;gene12532;gene20084	ITM2C;HGF;TNFAIP3;DEPTOR;TCF7L2;SIAH2;ATF3;AR;STAMBPL132;COL2A1
10	GO:0007599	BP	hemostasis	10/ 2723	23/ 12028	0.434783	0.0238676	0.527399	gene13258;gene913;gene7491;gene13257;gene14465;gene1800;gene10862;gene19934;gene3476;gene20064	CXCL1258;F5;P2RY8;CXCL1257;IL10RB;ANO6;F3;LOC106049424;SERPIND1;KCNIP2064
10	GO:0007596	BP	blood coagulation	10/ 2723	23/ 12028	0.434783	0.0238676	0.527399	gene13258;gene913;gene7491;gene13257;gene14465;gene1800;gene10862;gene19934;gene3476;gene20064	CXCL1258;F5;P2RY8;CXCL1257;IL10RB;ANO6;F3;LOC106049424;SERPIND1;KCNIP2064
53	GO:0051338	BP	regulation of transferase activity	53/ 2723	178/ 12028	0.297753	0.024167	0.53172	gene11723;gene5647;gene18522;gene16861;gene14542;gene9991;gene11989;gene19925;gene13513;gene2637;gene12205;gene13559;gene16645;gene6211;gene16763;gene7321;gene5520;gene2822;gene8984;gene18301;gene138;gene7975;gene5943;gene10561;gene8682;gene4565;gene15729;gene16499;gene18638;gene421;gene10955;gene2925;gene10220;gene6562;gene16004;gene11855;gene12312;gene6420;gene4021;gene7519;gene17804;gene14118;…	HNF4A3;DNMBP47;SFN;DUSP4;SPTSSB;DEPTOR;DAB2IP;TRAF4;UVRAG;BAG2;SDC4;SPRY1;CCND3;LCP2;ITGB3;HGF;PRKAR1B;PKIA;CD40LG;PRNP;ERCC6;FGF10;CYR61;LOC106039090;TNFSF15;TNFAIP3;ANXA8L129;FZR1;VPS25;RET;TCP1;ITGB1BP1;PRKCQ;KNDC162;SYK;SLC2A105;LIMK1;MSTN;ADRA2A;IGF1;TPX2;LPAR1;SLC38A26;SLC38A25;LOC106044437;KCNIP2037;NEK2;HHEX;EEF1A2;CCT4;TIRAP;SNX9;CDC20
39	GO:0090066	BP	regulation of anatomical structure size	39/ 2723	125/ 12028	0.312	0.0241778	0.53172	gene11987;gene5593;gene11436;gene9991;gene4209;gene12024;gene8030;gene6749;gene7410;gene5505;gene13411;gene5173;gene17622;gene9021;gene14022;gene18170;gene17316;gene13238;gene7870;gene11550;gene17263;gene13258;gene4952;gene4930;gene11403;gene15729;gene17645;gene421;gene13257;gene10811;gene3617;gene2925;gene6427;gene5162;gene4021;gene4315;gene6149;gene6023;gene18354	GSN;LOC106033657;WNT7A;DEPTOR;LOC106032083;LOC106040731;IL7R;PTPRM;HTR1A;BAIAP2L1;PTGR21;E2F4;FMNL1;AGTR2;KANK1;LOC106047519;EDN2;CXCL1238;AGTR1;NPPC;SPIRE2;CXCL1258;LOC1060339722;HRH2;KIF20B03;ANXA8L129;ACTR3B;RET;CXCL1257;LOC106039322;PLEKHH2;ITGB1BP1;CDC42EP4;RLTPR;ADRA2A;EDNRA;SNX9;ARHGAP42;LIMA1
20	GO:0000786	CC	nucleosome	20/ 2723	56/ 12028	0.357143	0.0244938	0.537822	gene7626;gene14856;gene18723;gene1575;gene20121;gene6084;gene13178;gene19177;gene1565;gene1570;gene1571;gene20120;gene1581;gene1566;gene1583;gene1582;gene1585;gene1568;gene1587;gene1569	LOC106035790;RAG16;LOC106048111;ANXA8L15;LOC106049626;FBXO30;LOC106042035;KIF17;LOC106045810;LOC106045851;LOC106045128;LOC106049629;LOC1060481531;LOC106045814;LOC1060481533;LOC1060481532;LOC1060481535;LOC106045117;LOC1060481537;LOC106045823
4	GO:0001754	BP	eye photoreceptor cell differentiation	4/ 2723	6/ 12028	0.666667	0.0264431	0.561149	gene19911;gene12509;gene7829;gene11197	SDK2;WNT2B;DSCAM;DSCAML1
4	GO:0050858	BP	negative regulation of antigen receptor-mediated signaling pathway	4/ 2723	6/ 12028	0.666667	0.0264431	0.561149	gene20631;gene20630;gene18301;gene7810	KCNIP2631;KCNIP2630;PRNP;UBASH3A
4	GO:0045910	BP	negative regulation of DNA recombination	4/ 2723	6/ 12028	0.666667	0.0264431	0.561149	gene14202;gene15751;gene2596;gene7516	MSH2;BCL6;PPRC196;PARPBP
4	GO:0007176	BP	regulation of epidermal growth factor-activated receptor activity	4/ 2723	6/ 12028	0.666667	0.0264431	0.561149	gene4021;gene17926;gene17925;gene18638	ADRA2A;SLC38A26;SLC38A25;VPS25
4	GO:0045743	BP	positive regulation of fibroblast growth factor receptor signaling pathway	4/ 2723	6/ 12028	0.666667	0.0264431	0.561149	gene7975;gene8439;gene645;gene12509	FGF10;WNT3A;FGFBP1;WNT2B
4	GO:0042130	BP	negative regulation of T cell proliferation	4/ 2723	6/ 12028	0.666667	0.0264431	0.561149	gene6988;gene3800;gene2415;gene18301	CASP3;ARG2;GPNMB;PRNP
4	GO:0014812	BP	muscle cell migration	4/ 2723	6/ 12028	0.666667	0.0264431	0.561149	gene15338;gene15442;gene6420;gene2925	PLAT;ANXA1;MSTN;ITGB1BP1
4	GO:0002701	BP	negative regulation of production of molecular mediator of immune response	4/ 2723	6/ 12028	0.666667	0.0264431	0.561149	gene20631;gene20630;gene15751;gene11205	KCNIP2631;KCNIP2630;BCL6;LOC106039769
4	GO:0097320	BP	plasma membrane tubulation	4/ 2723	6/ 12028	0.666667	0.0264431	0.561149	gene19262;gene11340;gene6149;gene1430	BIN2;SDPR;SNX9;PACSIN3
4	GO:0048635	BP	negative regulation of muscle organ development	4/ 2723	6/ 12028	0.666667	0.0264431	0.561149	gene12205;gene10690;gene7321;gene6420	SDC4;GPC1;HGF;MSTN
4	GO:0046530	BP	photoreceptor cell differentiation	4/ 2723	6/ 12028	0.666667	0.0264431	0.561149	gene19911;gene12509;gene7829;gene11197	SDK2;WNT2B;DSCAM;DSCAML1
4	GO:0032148	BP	activation of protein kinase B activity	4/ 2723	6/ 12028	0.666667	0.0264431	0.561149	gene4021;gene7519;gene11855;gene2925	ADRA2A;IGF1;SLC2A105;ITGB1BP1
4	GO:0045843	BP	negative regulation of striated muscle tissue development	4/ 2723	6/ 12028	0.666667	0.0264431	0.561149	gene12205;gene10690;gene7321;gene6420	SDC4;GPC1;HGF;MSTN
4	GO:0009913	BP	epidermal cell differentiation	4/ 2723	6/ 12028	0.666667	0.0264431	0.561149	gene6988;gene15442;gene15756;gene10138	CASP3;ANXA1;ANXA8L156;SLC35G138
4	GO:0019915	BP	lipid storage	4/ 2723	6/ 12028	0.666667	0.0264431	0.561149	gene13629;gene6774;gene1175;gene11205	SOAT1;CIDEA;FITM2;LOC106039769
4	GO:0042100	BP	B cell proliferation	4/ 2723	6/ 12028	0.666667	0.0264431	0.561149	gene8984;gene11359;gene1484;gene8030	CD40LG;HSPD1;RAG2;IL7R
4	GO:0030057	CC	desmosome	4/ 2723	6/ 12028	0.666667	0.0264431	0.561149	gene16670;gene9162;gene17714;gene9164	PKP1;LOC106037565;PKP3;DSG2
4	GO:0050664	MF	oxidoreductase activity, acting on NAD(P)H, oxygen as acceptor	4/ 2723	6/ 12028	0.666667	0.0264431	0.561149	gene12339;gene8965;gene14666;gene18099	NCF1;NOX1;LOC106043628;DUOX2
4	GO:0016493	MF	C-C chemokine receptor activity	4/ 2723	6/ 12028	0.666667	0.0264431	0.561149	gene12998;gene9870;gene20074;gene9869	CCR4;LOC106038357;CCR7;LOC106038356
4	GO:0016175	MF	superoxide-generating NADPH oxidase activity	4/ 2723	6/ 12028	0.666667	0.0264431	0.561149	gene12339;gene8965;gene14666;gene18099	NCF1;NOX1;LOC106043628;DUOX2
14	GO:0002263	BP	cell activation involved in immune response	14/ 2723	36/ 12028	0.388889	0.0269682	0.566252	gene11359;gene18685;gene6216;gene15351;gene1912;gene777;gene12706;gene9572;gene7614;gene8984;gene13257;gene14202;gene2532;gene3922	HSPD1;AICDA;DOCK2;LOC106044437;EXO1;CHGA;ANKRD2206;DNASE1L3;MFNG;CD40LG;CXCL1257;MSH2;PPRC132;LOC106031806
14	GO:0022409	BP	positive regulation of cell-cell adhesion	14/ 2723	36/ 12028	0.388889	0.0269682	0.566252	gene14139;gene11359;gene1485;gene15810;gene8984;gene2407;gene10230;gene10220;gene8030;gene4580;gene1932;gene15442;gene12495;gene2315	CBFB;HSPD1;RAG1;LOC10604815310;CD40LG;IL6;GATA3;PRKCQ;IL7R;CITED2;KIF26B;ANXA1;PTPN22;LOC106030066
9	GO:2000278	BP	regulation of DNA biosynthetic process	9/ 2723	20/ 12028	0.45	0.02806	0.585142	gene11723;gene7321;gene8689;gene3673;gene10220;gene10955;gene8301;gene3979;gene8228	HNF4A3;HGF;LOC106037040;NEK2;PRKCQ;TCP1;CCT4;CDHR19;PTPN218
18	GO:1902905	BP	positive regulation of supramolecular fiber organization	18/ 2723	50/ 12028	0.36	0.0280747	0.585142	gene11987;gene19671;gene17622;gene14118;gene6149;gene2925;gene13257;gene10811;gene4209;gene12024;gene13238;gene17645;gene6427;gene11205;gene17263;gene5162;gene12312;gene13515	GSN;WNT4;FMNL1;LPAR1;SNX9;ITGB1BP1;CXCL1257;LOC106039322;LOC106032083;LOC106040731;CXCL1238;ACTR3B;CDC42EP4;LOC106039769;SPIRE2;RLTPR;LIMK1;WNT11
9	GO:0045095	CC	keratin filament	9/ 2723	20/ 12028	0.45	0.02806	0.585142	gene19238;gene19240;gene19234;gene19237;gene19243;gene19245;gene19246;gene19242;gene18599	LOC106048695;LOC106048701;LOC106048691;LOC106048678;LOC106048705;LOC106048703;LOC106048699;LOC106048696;LOC106048011
9	GO:0033293	MF	monocarboxylic acid binding	9/ 2723	20/ 12028	0.45	0.02806	0.585142	gene16925;gene7215;gene5718;gene8070;gene2804;gene2802;gene576;gene8067;gene8066	PPARD;ACOX2;CPN118;LOC106036308;FABP5;LOC106030656;ACOX3;LOC106036392;LOC106036393
16	GO:0005044	MF	scavenger receptor activity	16/ 2723	43/ 12028	0.372093	0.0280781	0.585142	gene10107;gene11194;gene18876;gene44;gene17390;gene6326;gene20023;gene471;gene719;gene19872;gene19871;gene19690;gene10772;gene18341;gene3480;gene1201	PRSS12;TMPRSS13;ACTN26;LOXL4;ACKR4;ACKR3;SCARA5;HPSE21;HHIPL1;LOC106049352;LOC106049351;EIF2AK20;MARCO;ENDOU;LOC106031434;LOC106040595
114	GO:1902531	BP	regulation of intracellular signal transduction	114/ 2723	421/ 12028	0.270784	0.0283266	0.587682	gene2407;gene4367;gene6275;gene3922;gene7983;gene18301;gene12638;gene7793;gene13258;gene17468;gene14419;gene4973;gene13257;gene4080;gene11989;gene11855;gene6111;gene9790;gene7519;gene17807;gene12495;gene12086;gene95;gene2690;gene16208;gene12661;gene18524;gene3742;gene11687;gene13559;gene9552;gene4032;gene14022;gene11205;gene14784;gene7975;gene19641;gene6114;gene12773;gene20631;gene20630;gene15729…	IL6;GUCY1A3;ARHGEF37;LOC106031806;NIM1K;PRNP;LOC106041491;SIK1;CXCL1258;CYTH1;HOMER2;PRKAA2;CXCL1257;MECOM;DAB2IP;SLC2A105;PLEKHG1;FBLN1;IGF1;DUSP15;PTPN22;LOC106040774;CEP55;ARHGEF10;ARHGEF38;HSPB1;GPATCH3;ATF3;PKIG7;SPRY1;CEP5552;TCF7L2;KANK1;LOC106039769;RAP1GAP2;FGF10;LOC106049124;AKAP12;NOTCH2;KCNIP2631;KCNIP2630;ANXA8L129;SIPA1L2;ADRA2A;LOC106037440;SNAI1;VRK2;PPRC196;CLIC2;ACKR3;ALS2;RHOB;…
35	GO:0000226	BP	microtubule cytoskeleton organization	35/ 2723	110/ 12028	0.318182	0.0288507	0.597664	gene4555;gene2690;gene8973;gene10048;gene18427;gene5153;gene16684;gene13513;gene1007;gene11968;gene13559;gene9552;gene19193;gene5782;gene10631;gene6218;gene6723;gene8589;gene13006;gene540;gene13867;gene4323;gene10399;gene1382;gene3673;gene12315;gene1854;gene6775;gene17751;gene14015;gene12165;gene1261;gene13873;gene86;gene2190	MAP7;ARHGEF10;FGF13;CAPN6;NFKB227;TPPP3;NAV34;UVRAG;PHLDB2;LOC106040650;SPRY1;CEP5552;MAP1A;KIF18A;CEP19;LOC10603787018;NDC80;GAS2L3;TPPP;HAUS3;ERCC667;DCLK2;LOC106039004;NUSAP1;NEK2;SBDS;MAP10;TUBB6;KNSTRN;MAP1B;WEE1;AURKA;ERCC673;KIF11;SPC25
428	GO:0043168	MF	anion binding	428/ 2723	1735/ 12028	0.246686	0.0299769	0.616441	gene5018;gene10067;gene19495;gene9085;gene7046;gene17769;gene17768;gene6174;gene19150;gene3805;gene6070;gene9675;gene17645;gene14963;gene17507;gene16996;gene16992;gene4973;gene6775;gene2185;gene9889;gene20461;gene9404;gene556;gene12780;gene11906;gene18452;gene13398;gene6455;gene7477;gene2955;gene5520;gene18970;gene13629;gene13784;gene5091;gene11578;gene12566;gene3342;gene13563;gene20630;gene2120;…	REEP18;LOC106038552;RAB25;ASNS;STK3;LOC106047052;LOC106047050;ARAP3;TTK;PLEK2;LOC106034162;MCM3;ACTR3B;CD443;LOC106046816;SNX24;CSNK1G3;PRKAA2;TUBB6;STK39;HHLA29;KCNIP2461;RUNX3;GRK4;ANKRD2280;APLP2;NFKB252;BUB1;GNA13;GTPBP6;TRIB2;PRKAR1B;MYO1F;SOAT1;ACBD5;MMACHC;DGKQ;RAB7B;LOC106031149;PLA2G4F3;KCNIP2630;ADAM80;ARHGAP1921;MARCH811;SHMT1;ATP7B;LOC106049351;MCCC1;MAP3K8;SBK1;LOC106048786;GNAO1;SNX…
11	GO:0032675	BP	regulation of interleukin-6 production	11/ 2723	26/ 12028	0.423077	0.0307228	0.616788	gene16609;gene13258;gene11359;gene12566;gene7321;gene4565;gene3255;gene12495;gene2407;gene13257;gene11888	ADORA2B;CXCL1258;HSPD1;RAB7B;HGF;TNFAIP3;TRPV4;PTPN22;IL6;CXCL1257;TIRAP
11	GO:0048871	BP	multicellular organismal homeostasis	11/ 2723	26/ 12028	0.423077	0.0307228	0.616788	gene9552;gene4693;gene20213;gene18649;gene18522;gene3255;gene16816;gene4973;gene17316;gene15756;gene10654	CEP5552;EGR1;IL1B;PRCP;SFN;TRPV4;LOC1060466736;PRKAA2;EDN2;ANXA8L156;PASK
11	GO:0045995	BP	regulation of embryonic development	11/ 2723	26/ 12028	0.423077	0.0307228	0.616788	gene9134;gene19671;gene1209;gene15122;gene12509;gene13699;gene16393;gene11205;gene1007;gene4601;gene4508	F54;WNT4;SNAI1;LOC106044084;WNT2B;PHLDA2;AR;LOC106039769;PHLDB2;LAMA4;LAMA2
15	GO:1901136	BP	carbohydrate derivative catabolic process	15/ 2723	39/ 12028	0.384615	0.0324258	0.637153	gene16286;gene10638;gene1716;gene12624;gene13027;gene7438;gene15435;gene2125;gene13049;gene3122;gene17463;gene11773;gene18351;gene3094;gene7806	SAMHD1;NEU4;LYZ;GUSB;HPSE;LOC106035746;TMEM2;LOC106029917;NUDT9;CECR1;ENGASE;IDUA;GPD1;ARHGAP1994;PDE9A
36	GO:1902532	BP	negative regulation of intracellular signal transduction	36/ 2723	115/ 12028	0.313043	0.0327159	0.637153	gene10720;gene11315;gene12661;gene9991;gene18524;gene3742;gene4565;gene13559;gene9552;gene13189;gene15751;gene14022;gene20022;gene20631;gene18301;gene12336;gene7793;gene14419;gene4973;gene20630;gene13257;gene4080;gene2925;gene6562;gene7983;gene6420;gene9790;gene9039;gene1209;gene16861;gene12495;gene20035;gene6326;gene3089;gene12086;gene6023	OPA1;RNF152;HSPB1;DEPTOR;GPATCH3;ATF3;TNFAIP3;SPRY1;CEP5552;LOC106042065;BCL6;KANK1;PBK;KCNIP2631;PRNP;GATSL2;SIK1;HOMER2;PRKAA2;KCNIP2630;CXCL1257;MECOM;ITGB1BP1;KNDC162;NIM1K;MSTN;FBLN1;LOC106037440;SNAI1;DUSP4;PTPN22;CLIC2;ACKR3;ARHGAP1989;LOC106040774;ARHGAP42
5	GO:0051704	BP	multi-organism process	5/ 2723	9/ 12028	0.555556	0.032725	0.637153	gene20213;gene6479;gene17463;gene1716;gene4620	IL1B;KPNA2;ENGASE;LYZ;DDO
5	GO:0034204	BP	lipid translocation	5/ 2723	9/ 12028	0.555556	0.032725	0.637153	gene7455;gene1800;gene15833;gene5770;gene17717	BDKRB15;ANO6;LOC10604815333;CPN170;ANO9
5	GO:0045332	BP	phospholipid translocation	5/ 2723	9/ 12028	0.555556	0.032725	0.637153	gene7455;gene1800;gene15833;gene5770;gene17717	BDKRB15;ANO6;LOC10604815333;CPN170;ANO9
5	GO:0010596	BP	negative regulation of endothelial cell migration	5/ 2723	9/ 12028	0.555556	0.032725	0.637153	gene5716;gene6749;gene2925;gene8539;gene19382	CPN116;PTPRM;ITGB1BP1;DCN;STC1
5	GO:0050704	BP	regulation of interleukin-1 secretion	5/ 2723	9/ 12028	0.555556	0.032725	0.637153	gene12858;gene4565;gene3800;gene11870;gene11205	IL1R2;TNFAIP3;ARG2;EYA20;LOC106039769
5	GO:0042056	MF	chemoattractant activity	5/ 2723	9/ 12028	0.555556	0.032725	0.637153	gene5563;gene7975;gene11855;gene7321;gene13515	FGF7;FGF10;SLC2A105;HGF;WNT11
13	GO:0070304	BP	positive regulation of stress-activated protein kinase signaling cascade	13/ 2723	33/ 12028	0.393939	0.0342572	0.654979	gene17807;gene11436;gene3255;gene11989;gene8984;gene19925;gene13257;gene11888;gene11687;gene138;gene16004;gene11855;gene10561	DUSP15;WNT7A;TRPV4;DAB2IP;CD40LG;TRAF4;CXCL1257;TIRAP;PKIG7;ERCC6;SYK;SLC2A105;LOC106039090
13	GO:0043547	BP	positive regulation of GTPase activity	13/ 2723	33/ 12028	0.393939	0.0342572	0.654979	gene11855;gene13258;gene19671;gene12638;gene13257;gene16111;gene19162;gene6023;gene19119;gene17406;gene12205;gene6149;gene13515	SLC2A105;CXCL1258;WNT4;LOC106041491;CXCL1257;RAB11FIP2;LOC106048595;ARHGAP42;RHOG;TBC1D9;SDC4;SNX9;WNT11
13	GO:0032874	BP	positive regulation of stress-activated MAPK cascade	13/ 2723	33/ 12028	0.393939	0.0342572	0.654979	gene17807;gene11436;gene3255;gene11989;gene8984;gene19925;gene13257;gene11888;gene11687;gene138;gene16004;gene11855;gene10561	DUSP15;WNT7A;TRPV4;DAB2IP;CD40LG;TRAF4;CXCL1257;TIRAP;PKIG7;ERCC6;SYK;SLC2A105;LOC106039090
267	GO:0032502	BP	developmental process	267/ 2723	1057/ 12028	0.252602	0.0343249	0.654979	gene16525;gene12412;gene14367;gene8973;gene1932;gene18995;gene11197;gene18999;gene4411;gene2407;gene11588;gene14089;gene12509;gene3922;gene2830;gene16171;gene5173;gene14167;gene16004;gene5782;gene1463;gene3800;gene9552;gene9570;gene10230;gene9572;gene1668;gene13809;gene17316;gene10578;gene4919;gene1662;gene2088;gene9164;gene18636;gene16994;gene5730;gene16576;gene16437;gene19911;gene15801;gene1555…	MARCH825;LOC106041201;LOC10604643967;FGF13;KIF26B;CSF1;DSCAML1;SLC6A17;NPY1R;IL6;DNAJA1;GRIN3A;WNT2B;LOC106031806;CRISPLD1;FZD8;E2F4;CREB3L17;SYK;KIF18A;ALX4;ARG2;CEP5552;CEP5570;GATA3;DNASE1L3;NAV3;VCAN;EDN2;CHRNA9;EBF1;SYT1;TFCP2L1;DSG2;CNTNAP1;PRDM6;CPN130;MARCH876;GPCPD1;SDK2;LOC10604815301;MXRA8;LOC106041556;CXCL1257;SLC38A25;BEST35;INTU;FGF9;LOC106039769;CA9;SBDS;SLC2A105;IGF1;HNF4A;OSTM1;L…
87	GO:0042981	BP	regulation of apoptotic process	87/ 2723	315/ 12028	0.27619	0.0344836	0.654979	gene11359;gene17471;gene2407;gene2765;gene9085;gene10720;gene1463;gene3800;gene13238;gene18300;gene18301;gene13258;gene4973;gene3047;gene7661;gene16473;gene12494;gene12081;gene20013;gene12661;gene18522;gene3742;gene12305;gene20084;gene1485;gene9021;gene4032;gene14384;gene8705;gene5598;gene17686;gene15729;gene2519;gene349;gene1209;gene10080;gene4580;gene6326;gene4693;gene606;gene6247;gene8030;gene…	HSPD1;SOCS3;IL6;RIPK2;ASNS;OPA1;ALX4;ARG2;CXCL1238;RASSF2;PRNP;CXCL1258;PRKAA2;ARHGAP1947;ATF4;ANGPTL4;BCL2L15;EEF1A2;ZNF346;HSPB1;SFN;ATF3;LOC106041090;COL2A1;RAG1;AGTR2;TCF7L2;BCL2A1;TOR4A;LOC106033662;TRAF3;ANXA8L129;RARB;CDK1;SNAI1;XIAP;CITED2;ACKR3;EGR1;MSX1;GABRB2;IL7R;MSH2;LOC106048637;HGF;DCUN1D3;AMIGO2;LOC10602987816;ACTC1;CYR61;DAPK1;TNFAIP3;GRIN2A;TCP1;PIM3;PRKCQ;LOC106029353;RHOB;WNT4…
6	GO:0032651	BP	regulation of interleukin-1 beta production	6/ 2723	12/ 12028	0.5	0.0346763	0.654979	gene4693;gene12661;gene13258;gene4565;gene3800;gene11205	EGR1;HSPB1;CXCL1258;TNFAIP3;ARG2;LOC106039769
6	GO:2000243	BP	positive regulation of reproductive process	6/ 2723	12/ 12028	0.5	0.0346763	0.654979	gene606;gene19671;gene15176;gene4580;gene16393;gene11109	MSX1;WNT4;LOC106044180;CITED2;AR;HSPA8
6	GO:0002824	BP	positive regulation of adaptive immune response based on somatic recombination of immune receptors built from immunoglobulin superfamily domains	6/ 2723	12/ 12028	0.5	0.0346763	0.654979	gene11359;gene15810;gene10220;gene13348;gene15442;gene14202	HSPD1;LOC10604815310;PRKCQ;CD226;ANXA1;MSH2
6	GO:0002821	BP	positive regulation of adaptive immune response	6/ 2723	12/ 12028	0.5	0.0346763	0.654979	gene11359;gene15810;gene10220;gene13348;gene15442;gene14202	HSPD1;LOC10604815310;PRKCQ;CD226;ANXA1;MSH2
6	GO:0033559	BP	unsaturated fatty acid metabolic process	6/ 2723	12/ 12028	0.5	0.0346763	0.654979	gene7393;gene1341;gene19151;gene17316;gene5990;gene5871	ELOVL7;PTGR2;ELOVL4;EDN2;PTGS2;ELOVL1
6	GO:0002702	BP	positive regulation of production of molecular mediator of immune response	6/ 2723	12/ 12028	0.5	0.0346763	0.654979	gene15187;gene12495;gene2407;gene13348;gene13257;gene14202	SEMA7A;PTPN22;IL6;CD226;CXCL1257;MSH2
6	GO:0050829	BP	defense response to Gram-negative bacterium	6/ 2723	12/ 12028	0.5	0.0346763	0.654979	gene1716;gene17830;gene777;gene12946;gene20778;gene3857	LYZ;LOC106047130;CHGA;HMGB2;KCNIP2778;PRKD1
6	GO:2001237	BP	negative regulation of extrinsic apoptotic signaling pathway	6/ 2723	12/ 12028	0.5	0.0346763	0.654979	gene7321;gene4565;gene4032;gene18317;gene16393;gene20084	HGF;TNFAIP3;TCF7L2;SIAH2;AR;COL2A1
6	GO:1903018	BP	regulation of glycoprotein metabolic process	6/ 2723	12/ 12028	0.5	0.0346763	0.654979	gene11630;gene6851;gene4032;gene2754;gene13629;gene18391	ITM2C;ITM2B;TCF7L2;PCBD14;SOAT1;NECAB3
6	GO:0010559	BP	regulation of glycoprotein biosynthetic process	6/ 2723	12/ 12028	0.5	0.0346763	0.654979	gene11630;gene6851;gene4032;gene2754;gene13629;gene18391	ITM2C;ITM2B;TCF7L2;PCBD14;SOAT1;NECAB3
6	GO:0032233	BP	positive regulation of actin filament bundle assembly	6/ 2723	12/ 12028	0.5	0.0346763	0.654979	gene19671;gene14118;gene2925;gene11205;gene12312;gene13515	WNT4;LPAR1;ITGB1BP1;LOC106039769;LIMK1;WNT11
8	GO:0050777	BP	negative regulation of immune response	8/ 2723	17/ 12028	0.470588	0.0355129	0.654979	gene5733;gene16286;gene4565;gene3800;gene8030;gene15751;gene15442;gene11205	SERPING1;SAMHD1;TNFAIP3;ARG2;IL7R;BCL6;ANXA1;LOC106039769
8	GO:0034763	BP	negative regulation of transmembrane transport	8/ 2723	17/ 12028	0.470588	0.0355129	0.654979	gene6965;gene11350;gene8200;gene20035;gene2804;gene2731;gene16801;gene13482	MTNR1A;HECW2;GRB10;CLIC2;FABP5;GEM;PRKCB;KCNE3
8	GO:0030217	BP	T cell differentiation	8/ 2723	17/ 12028	0.470588	0.0355129	0.654979	gene4693;gene1484;gene1485;gene2532;gene12495;gene8030;gene15442;gene3922	EGR1;RAG2;RAG1;PPRC132;PTPN22;IL7R;ANXA1;LOC106031806
37	GO:0097435	BP	supramolecular fiber organization	37/ 2723	119/ 12028	0.310924	0.0356876	0.654979	gene11987;gene15613;gene8973;gene1394;gene3255;gene6860;gene4209;gene5153;gene3332;gene20084;gene9552;gene7610;gene5782;gene17622;gene4035;gene14127;gene9024;gene13006;gene13238;gene17645;gene3842;gene18599;gene17263;gene6974;gene16576;gene19389;gene19388;gene8900;gene10811;gene5162;gene15783;gene15122;gene8538;gene9031;gene12024;gene13658;gene18354	GSN;RHOB;FGF13;RHOV;TRPV4;LCP1;LOC106032083;TPPP3;RHOF;COL2A1;CEP5552;RAC2;KIF18A;FMNL1;NRAP;BCAR1;PLS3;TPPP;CXCL1238;ACTR3B;ACTC1;LOC106048011;SPIRE2;PDLIM3;MARCH876;NEFL;NEFM;PSTPIP2;LOC106039322;RLTPR;COTL1;LOC106044084;LUM;GDPD2;LOC106040731;ARHGAP6;LIMA1
9	GO:0008037	BP	cell recognition	9/ 2723	21/ 12028	0.428571	0.0357449	0.654979	gene6216;gene11197;gene16336;gene15176;gene7829;gene10955;gene8301;gene11875;gene8228	DOCK2;DSCAML1;CD9;LOC106044180;DSCAM;TCP1;CCT4;ROBO4;PTPN218
34	GO:0051276	BP	chromosome organization	34/ 2723	108/ 12028	0.314815	0.0367393	0.654979	gene14526;gene4032;gene6255;gene15442;gene14202;gene7418;gene18285;gene18493;gene6723;gene4757;gene5305;gene5880;gene18427;gene19763;gene13310;gene658;gene2731;gene14982;gene959;gene3979;gene5161;gene7626;gene9605;gene2496;gene3673;gene9507;gene12946;gene88;gene9911;gene17737;gene20078;gene9299;gene8833;gene20369	TOP1;TCF7L2;PTTG1;ANXA1;MSH2;CENPK;NCAPH;NFKB293;NDC80;MEIKIN;CENPN;PIF1;NFKB227;GINS2;TOP1MT;NCAPG;GEM;CENPC;CEP559;CDHR19;LOC106033135;LOC106035790;MCM2;SGOL1;NEK2;LOC106037928;HMGB2;HHEX;MCM4;RAD51;TOP2A;CENPI;HSPA2;INCENP
41	GO:0098609	BP	cell-cell adhesion	41/ 2723	135/ 12028	0.303704	0.0380109	0.654979	gene11197;gene17714;gene10829;gene2722;gene16880;gene6749;gene10982;gene4870;gene7610;gene16763;gene13549;gene18133;gene20006;gene20353;gene20350;gene20275;gene12221;gene397;gene9163;gene9162;gene5943;gene9164;gene19621;gene3172;gene19911;gene19975;gene421;gene17535;gene11875;gene16670;gene15768;gene20156;gene6166;gene6673;gene7829;gene8958;gene17324;gene12123;gene4907;gene17323;gene2370	DSCAML1;PKP3;VCAM1;LOC106030627;LOC106046116;PTPRM;CBLN1;FAT2;RAC2;ITGB3;FAT4;SCARF2;LOC106049502;LOC106049866;LOC106049863;KCNIP2275;PCDH18;CDHR1;LOC106037566;LOC106037565;CYR61;DSG2;MADCAM1;PKP2;SDK2;LOC106049466;RET;VMP1;ROBO4;PKP1;CDH13;LOC106049646;LOC106034313;DSP;DSCAM;PCDH19;LOC106046593;CDH4;CYFIP2;LOC106046592;ITGB2
133	GO:0051128	BP	regulation of cellular component organization	133/ 2723	502/ 12028	0.26494	0.0383391	0.654979	gene11987;gene11985;gene8973;gene1394;gene11350;gene4965;gene2407;gene4209;gene3885;gene12800;gene5782;gene15768;gene6723;gene19150;gene3805;gene13238;gene18302;gene17645;gene13942;gene11109;gene16574;gene4973;gene16999;gene13257;gene7829;gene3617;gene11205;gene12312;gene12816;gene17804;gene5338;gene14118;gene14209;gene14957;gene8301;gene6068;gene3187;gene11630;gene18522;gene2699;gene4952;gene100…	GSN;CNTRL;FGF13;RHOV;HECW2;JUN;IL6;LOC106032083;RASSF7;MYOC;KIF18A;CDH13;NDC80;TTK;PLEK2;CXCL1238;PROM2;ACTR3B;RHOV2;HSPA8;MARCH874;PRKAA2;SNCAIP;CXCL1257;DSCAM;PLEKHH2;LOC106039769;LIMK1;LOC106041556;TPX2;LOC1060333288;LPAR1;STON1;JCHAIN;CCT4;MSX18;PTN;ITM2C;SFN;SH3YL1;LOC1060339722;PHLDB2;CBLN1;BUB1;ITGB3;PRKCQ;LOC10603787018;KANK1;CAPN2;SPIRE2;LOC106033657;NOTCH2;SEC22B;KCNIP2631;KCNIP2630;KIF…
3	GO:0030851	BP	granulocyte differentiation	3/ 2723	4/ 12028	0.75	0.0385048	0.654979	gene1439;gene17498;gene4580	LOC1060464399;FASN;CITED2
3	GO:0036388	BP	pre-replicative complex assembly	3/ 2723	4/ 12028	0.75	0.0385048	0.654979	gene9911;gene9675;gene9605	MCM4;MCM3;MCM2
3	GO:0051044	BP	positive regulation of membrane protein ectodomain proteolysis	3/ 2723	4/ 12028	0.75	0.0385048	0.654979	gene4021;gene1430;gene6149	ADRA2A;PACSIN3;SNX9
3	GO:0010838	BP	positive regulation of keratinocyte proliferation	3/ 2723	4/ 12028	0.75	0.0385048	0.654979	gene5563;gene12773;gene15756	FGF7;NOTCH2;ANXA8L156
3	GO:2001016	BP	positive regulation of skeletal muscle cell differentiation	3/ 2723	4/ 12028	0.75	0.0385048	0.654979	gene10690;gene19671;gene12904	GPC1;WNT4;RBM24
3	GO:0046636	BP	negative regulation of alpha-beta T cell activation	3/ 2723	4/ 12028	0.75	0.0385048	0.654979	gene14139;gene15442;gene3800	CBFB;ANXA1;ARG2
3	GO:1902299	BP	pre-replicative complex assembly involved in cell cycle DNA replication	3/ 2723	4/ 12028	0.75	0.0385048	0.654979	gene9911;gene9675;gene9605	MCM4;MCM3;MCM2
3	GO:0071674	BP	mononuclear cell migration	3/ 2723	4/ 12028	0.75	0.0385048	0.654979	gene15442;gene12638;gene19162	ANXA1;LOC106041491;LOC106048595
3	GO:0071677	BP	positive regulation of mononuclear cell migration	3/ 2723	4/ 12028	0.75	0.0385048	0.654979	gene9870;gene9713;gene9869	LOC106038357;PLA2G7;LOC106038356
3	GO:0002889	BP	regulation of immunoglobulin mediated immune response	3/ 2723	4/ 12028	0.75	0.0385048	0.654979	gene14202;gene13348;gene15751	MSH2;CD226;BCL6
3	GO:0098581	BP	detection of external biotic stimulus	3/ 2723	4/ 12028	0.75	0.0385048	0.654979	gene20213;gene2836;gene10561	IL1B;LY96;LOC106039090
3	GO:0048484	BP	enteric nervous system development	3/ 2723	4/ 12028	0.75	0.0385048	0.654979	gene18170;gene421;gene4315	LOC106047519;RET;EDNRA
3	GO:0046885	BP	regulation of hormone biosynthetic process	3/ 2723	4/ 12028	0.75	0.0385048	0.654979	gene4693;gene19671;gene2646	EGR1;WNT4;BMP5
3	GO:0006030	BP	chitin metabolic process	3/ 2723	4/ 12028	0.75	0.0385048	0.654979	gene5570;gene16641;gene16642	FBN1;LOC106045866;LOC106045865
3	GO:0007175	BP	negative regulation of epidermal growth factor-activated receptor activity	3/ 2723	4/ 12028	0.75	0.0385048	0.654979	gene17926;gene17925;gene18638	SLC38A26;SLC38A25;VPS25
3	GO:0002828	BP	regulation of type 2 immune response	3/ 2723	4/ 12028	0.75	0.0385048	0.654979	gene15442;gene3800;gene15751	ANXA1;ARG2;BCL6
3	GO:0003334	BP	keratinocyte development	3/ 2723	4/ 12028	0.75	0.0385048	0.654979	gene18522;gene9570;gene18527	SFN;CEP5570;KDF1
3	GO:0009595	BP	detection of biotic stimulus	3/ 2723	4/ 12028	0.75	0.0385048	0.654979	gene20213;gene2836;gene10561	IL1B;LY96;LOC106039090
3	GO:0050711	BP	negative regulation of interleukin-1 secretion	3/ 2723	4/ 12028	0.75	0.0385048	0.654979	gene12858;gene11205;gene4565	IL1R2;LOC106039769;TNFAIP3
3	GO:1902723	BP	negative regulation of skeletal muscle satellite cell proliferation	3/ 2723	4/ 12028	0.75	0.0385048	0.654979	gene12205;gene10690;gene6420	SDC4;GPC1;MSTN
3	GO:0070203	BP	regulation of establishment of protein localization to telomere	3/ 2723	4/ 12028	0.75	0.0385048	0.654979	gene10955;gene8301;gene8228	TCP1;CCT4;PTPN218
3	GO:0070202	BP	regulation of establishment of protein localization to chromosome	3/ 2723	4/ 12028	0.75	0.0385048	0.654979	gene10955;gene8301;gene8228	TCP1;CCT4;PTPN218
3	GO:0014859	BP	negative regulation of skeletal muscle cell proliferation	3/ 2723	4/ 12028	0.75	0.0385048	0.654979	gene12205;gene10690;gene6420	SDC4;GPC1;MSTN
3	GO:0061099	BP	negative regulation of protein tyrosine kinase activity	3/ 2723	4/ 12028	0.75	0.0385048	0.654979	gene17926;gene17925;gene18638	SLC38A26;SLC38A25;VPS25
3	GO:1903055	BP	positive regulation of extracellular matrix organization	3/ 2723	4/ 12028	0.75	0.0385048	0.654979	gene1007;gene5162;gene2407	PHLDB2;RLTPR;IL6
3	GO:2000303	BP	regulation of ceramide biosynthetic process	3/ 2723	4/ 12028	0.75	0.0385048	0.654979	gene20183;gene6416;gene5943	ORMDL3;ORMDL1;CYR61
3	GO:0002548	BP	monocyte chemotaxis	3/ 2723	4/ 12028	0.75	0.0385048	0.654979	gene15442;gene12638;gene19162	ANXA1;LOC106041491;LOC106048595
3	GO:0032660	BP	regulation of interleukin-17 production	3/ 2723	4/ 12028	0.75	0.0385048	0.654979	gene10220;gene3800;gene18301	PRKCQ;ARG2;PRNP
3	GO:0045907	BP	positive regulation of vasoconstriction	3/ 2723	4/ 12028	0.75	0.0385048	0.654979	gene13258;gene11403;gene4930	CXCL1258;KIF20B03;HRH2
3	GO:0099550	BP	trans-synaptic signaling, modulating synaptic transmission	3/ 2723	4/ 12028	0.75	0.0385048	0.654979	gene13258;gene16250;gene4367	CXCL1258;NTRK2;GUCY1A3
3	GO:0034139	BP	regulation of toll-like receptor 3 signaling pathway	3/ 2723	4/ 12028	0.75	0.0385048	0.654979	gene4565;gene12495;gene13257	TNFAIP3;PTPN22;CXCL1257
3	GO:0061311	BP	cell surface receptor signaling pathway involved in heart development	3/ 2723	4/ 12028	0.75	0.0385048	0.654979	gene606;gene8439;gene1209	MSX1;WNT3A;SNAI1
3	GO:0007100	BP	mitotic centrosome separation	3/ 2723	4/ 12028	0.75	0.0385048	0.654979	gene1261;gene17415;gene86	AURKA;NDEL1;KIF11
3	GO:0090026	BP	positive regulation of monocyte chemotaxis	3/ 2723	4/ 12028	0.75	0.0385048	0.654979	gene9870;gene9713;gene9869	LOC106038357;PLA2G7;LOC106038356
3	GO:0070593	BP	dendrite self-avoidance	3/ 2723	4/ 12028	0.75	0.0385048	0.654979	gene7829;gene11875;gene11197	DSCAM;ROBO4;DSCAML1
3	GO:2000778	BP	positive regulation of interleukin-6 secretion	3/ 2723	4/ 12028	0.75	0.0385048	0.654979	gene13258;gene3255;gene13257	CXCL1258;TRPV4;CXCL1257
3	GO:0051497	BP	negative regulation of stress fiber assembly	3/ 2723	4/ 12028	0.75	0.0385048	0.654979	gene9552;gene1007;gene13658	CEP5552;PHLDB2;ARHGAP6
3	GO:0060055	BP	angiogenesis involved in wound healing	3/ 2723	4/ 12028	0.75	0.0385048	0.654979	gene13027;gene18649;gene3131	HPSE;PRCP;ADIPOR2
3	GO:0032703	BP	negative regulation of interleukin-2 production	3/ 2723	4/ 12028	0.75	0.0385048	0.654979	gene4565;gene18301;gene14419	TNFAIP3;PRNP;HOMER2
3	GO:0051451	BP	myoblast migration	3/ 2723	4/ 12028	0.75	0.0385048	0.654979	gene15442;gene6420;gene2925	ANXA1;MSTN;ITGB1BP1
3	GO:0045110	BP	intermediate filament bundle assembly	3/ 2723	4/ 12028	0.75	0.0385048	0.654979	gene19389;gene19388;gene18599	NEFL;NEFM;LOC106048011
3	GO:0006267	BP	pre-replicative complex assembly involved in nuclear cell cycle DNA replication	3/ 2723	4/ 12028	0.75	0.0385048	0.654979	gene9911;gene9675;gene9605	MCM4;MCM3;MCM2
3	GO:0006268	BP	DNA unwinding involved in DNA replication	3/ 2723	4/ 12028	0.75	0.0385048	0.654979	gene9911;gene17737;gene9605	MCM4;RAD51;MCM2
3	GO:0030216	BP	keratinocyte differentiation	3/ 2723	4/ 12028	0.75	0.0385048	0.654979	gene6988;gene15442;gene15756	CASP3;ANXA1;ANXA8L156
3	GO:0090153	BP	regulation of sphingolipid biosynthetic process	3/ 2723	4/ 12028	0.75	0.0385048	0.654979	gene20183;gene6416;gene5943	ORMDL3;ORMDL1;CYR61
3	GO:0032232	BP	negative regulation of actin filament bundle assembly	3/ 2723	4/ 12028	0.75	0.0385048	0.654979	gene9552;gene1007;gene13658	CEP5552;PHLDB2;ARHGAP6
3	GO:0030890	BP	positive regulation of B cell proliferation	3/ 2723	4/ 12028	0.75	0.0385048	0.654979	gene3922;gene15810;gene15751	LOC106031806;LOC10604815310;BCL6
3	GO:0046785	BP	microtubule polymerization	3/ 2723	4/ 12028	0.75	0.0385048	0.654979	gene5153;gene13006;gene8973	TPPP3;TPPP;FGF13
3	GO:1905038	BP	regulation of membrane lipid metabolic process	3/ 2723	4/ 12028	0.75	0.0385048	0.654979	gene20183;gene6416;gene5943	ORMDL3;ORMDL1;CYR61
3	GO:0002712	BP	regulation of B cell mediated immunity	3/ 2723	4/ 12028	0.75	0.0385048	0.654979	gene14202;gene13348;gene15751	MSH2;CD226;BCL6
3	GO:1904851	BP	positive regulation of establishment of protein localization to telomere	3/ 2723	4/ 12028	0.75	0.0385048	0.654979	gene10955;gene8301;gene8228	TCP1;CCT4;PTPN218
25	GO:0072507	BP	divalent inorganic cation homeostasis	25/ 2723	76/ 12028	0.328947	0.0386118	0.654979	gene13258;gene3255;gene13572;gene17316;gene20364;gene7870;gene15867;gene10578;gene4899;gene19382;gene15729;gene12427;gene5713;gene2105;gene6815;gene13257;gene14055;gene14052;gene14053;gene14118;gene5577;gene7661;gene17041;gene16801;gene17531	CXCL1258;TRPV4;TRPC3;EDN2;MOCS14;AGTR1;LOC10604815367;CHRNA9;SGCD;STC1;ANXA8L129;GRIN2A;CIB2;ADCY5;ATP7B;CXCL1257;GPR174;LPAR4;LOC106042993;LPAR1;SLC24A5;ATF4;LOC106046290;PRKCB;PTH1R
13	GO:0010594	BP	regulation of endothelial cell migration	13/ 2723	34/ 12028	0.382353	0.0387302	0.654979	gene15613;gene3187;gene18649;gene12661;gene19382;gene11436;gene5716;gene645;gene14127;gene6749;gene2925;gene15442;gene8539	RHOB;PTN;PRCP;HSPB1;STC1;WNT7A;CPN116;FGFBP1;BCAR1;PTPRM;ITGB1BP1;ANXA1;DCN
17	GO:0009617	BP	response to bacterium	17/ 2723	48/ 12028	0.354167	0.0387668	0.654979	gene1484;gene1716;gene18685;gene20548;gene17830;gene777;gene3700;gene3796;gene12946;gene14957;gene3857;gene7438;gene3860;gene20778;gene18293;gene19767;gene12747	RAG2;LYZ;AICDA;LOC106029404;LOC106047130;CHGA;TLR5;TMEM229B;HMGB2;JCHAIN;PRKD1;LOC106035746;COCH;KCNIP2778;GKN2;IRF8;ANKRD2247
86	GO:0009653	BP	anatomical structure morphogenesis	86/ 2723	313/ 12028	0.27476	0.0401787	0.654979	gene12412;gene2447;gene2830;gene5173;gene14167;gene1463;gene18014;gene9570;gene2088;gene18636;gene16576;gene15801;gene4411;gene13541;gene11699;gene8061;gene5330;gene12123;gene7944;gene10004;gene12268;gene3187;gene4424;gene20084;gene9552;gene6215;gene12165;gene7975;gene2265;gene4899;gene12773;gene15729;gene421;gene2519;gene3739;gene15122;gene4580;gene8439;gene8959;gene10578;gene606;gene8030;gene26…	LOC106041201;HOXA2;CRISPLD1;E2F4;CREB3L17;ALX4;FANCC;CEP5570;TFCP2L1;CNTNAP1;MARCH876;LOC10604815301;NPY1R;INTU;FGF9;CA9;LOC1060333280;CDH4;NYAP2;EXT1;ACVR2A;PTN;CPE;COL2A1;CEP5552;FOXI1;WEE1;FGF10;PAPSS25;SGCD;NOTCH2;ANXA8L129;RET;RARB;FLVCR1;LOC106044084;CITED2;WNT3A;TNMD;CHRNA9;MSX1;IL7R;RAB23;SEMA3E;HGF;PAX9;MYC;WNT10A;WNT6;RAB3IP0;ACTC1;CYR61;PPRC132;SLC35G138;WNT2B;SYK;GCNT4;SLC38A26;SLC38A…
46	GO:1903530	BP	regulation of secretion by cell	46/ 2723	154/ 12028	0.298701	0.0412042	0.654979	gene11436;gene3255;gene777;gene3700;gene2407;gene15442;gene7410;gene14089;gene4347;gene2975;gene13411;gene16609;gene2480;gene7610;gene11169;gene3800;gene20823;gene4032;gene8984;gene19011;gene11771;gene4565;gene11205;gene1662;gene10561;gene13258;gene12651;gene16574;gene20631;gene20630;gene15729;gene16999;gene13257;gene2105;gene12195;gene11870;gene4021;gene7519;gene1172;gene12858;gene12495;gene268;…	WNT7A;TRPV4;CHGA;TLR5;IL6;ANXA1;HTR1A;GRIN3A;LOC106032265;VSNL1;PTGR21;ADORA2B;DPH3;RAC2;IL18;ARG2;LOC106029694;TCF7L2;CD40LG;LOC10602987811;CHRNB3;TNFAIP3;LOC106039769;SYT1;LOC106039090;CXCL1258;RASL10B;MARCH874;KCNIP2631;KCNIP2630;ANXA8L129;SNCAIP;CXCL1257;ADCY5;LOC106040927;EYA20;ADRA2A;IGF1;HNF4A;IL1R2;PTPN22;NPFFR1;PRKCB;BLK;PASK;ITGB2
46	GO:0009607	BP	response to biotic stimulus	46/ 2723	154/ 12028	0.298701	0.0412042	0.654979	gene12661;gene20548;gene777;gene4965;gene2407;gene4367;gene7438;gene2836;gene3889;gene9552;gene16286;gene1484;gene17830;gene13927;gene20778;gene9727;gene13649;gene3860;gene3796;gene19767;gene19641;gene10561;gene17686;gene13258;gene11570;gene11888;gene20823;gene19609;gene13257;gene3700;gene1716;gene20213;gene18293;gene4347;gene18685;gene6988;gene19459;gene20308;gene15783;gene2596;gene12946;gene149…	HSPB1;LOC106029404;CHGA;JUN;IL6;GUCY1A3;LOC106035746;LY96;IRF7;CEP5552;SAMHD1;RAG2;LOC106047130;LOC106042804;KCNIP2778;KCNJ8;TLR7;COCH;TMEM229B;IRF8;LOC106049124;LOC106039090;TRAF3;CXCL1258;STK40;TIRAP;LOC106029694;LOC106049106;CXCL1257;TLR5;LYZ;IL1B;GKN2;LOC106032265;AICDA;CASP3;IRF5;LOC106049812;COTL1;PPRC196;HMGB2;JCHAIN;PRKD1;RAG16;ANKRD2247;PTPN218
32	GO:0043410	BP	positive regulation of MAPK cascade	32/ 2723	101/ 12028	0.316832	0.0413791	0.654979	gene11436;gene3255;gene2407;gene19925;gene11687;gene3922;gene7321;gene8984;gene138;gene7975;gene12638;gene10561;gene13258;gene12773;gene15187;gene15729;gene421;gene13257;gene16250;gene2415;gene11989;gene16393;gene16004;gene11855;gene4021;gene7519;gene17807;gene14118;gene12495;gene6326;gene11888;gene19162	WNT7A;TRPV4;IL6;TRAF4;PKIG7;LOC106031806;HGF;CD40LG;ERCC6;FGF10;LOC106041491;LOC106039090;CXCL1258;NOTCH2;SEMA7A;ANXA8L129;RET;CXCL1257;NTRK2;GPNMB;DAB2IP;AR;SYK;SLC2A105;ADRA2A;IGF1;DUSP15;LPAR1;PTPN22;ACKR3;TIRAP;LOC106048595
26	GO:0007015	BP	actin filament organization	26/ 2723	79/ 12028	0.329114	0.0417453	0.654979	gene11987;gene15613;gene1394;gene3255;gene6860;gene4209;gene12024;gene3332;gene7610;gene17622;gene4035;gene14127;gene9024;gene13238;gene17645;gene3842;gene17263;gene6974;gene16576;gene8900;gene10811;gene5162;gene15783;gene9031;gene13658;gene18354	GSN;RHOB;RHOV;TRPV4;LCP1;LOC106032083;LOC106040731;RHOF;RAC2;FMNL1;NRAP;BCAR1;PLS3;CXCL1238;ACTR3B;ACTC1;SPIRE2;PDLIM3;MARCH876;PSTPIP2;LOC106039322;RLTPR;COTL1;GDPD2;ARHGAP6;LIMA1
88	GO:0043067	BP	regulation of programmed cell death	88/ 2723	320/ 12028	0.275	0.0419602	0.654979	gene11359;gene17471;gene2407;gene2765;gene9085;gene10720;gene1463;gene3800;gene13238;gene18300;gene18301;gene13258;gene4973;gene3047;gene7661;gene16473;gene12494;gene12081;gene20013;gene12661;gene18522;gene3742;gene12305;gene20084;gene1485;gene9021;gene4032;gene14384;gene8705;gene5598;gene17686;gene15729;gene2519;gene349;gene1209;gene10080;gene4580;gene6326;gene4693;gene606;gene6247;gene8030;gene…	HSPD1;SOCS3;IL6;RIPK2;ASNS;OPA1;ALX4;ARG2;CXCL1238;RASSF2;PRNP;CXCL1258;PRKAA2;ARHGAP1947;ATF4;ANGPTL4;BCL2L15;EEF1A2;ZNF346;HSPB1;SFN;ATF3;LOC106041090;COL2A1;RAG1;AGTR2;TCF7L2;BCL2A1;TOR4A;LOC106033662;TRAF3;ANXA8L129;RARB;CDK1;SNAI1;XIAP;CITED2;ACKR3;EGR1;MSX1;GABRB2;IL7R;MSH2;LOC106048637;HGF;DCUN1D3;AMIGO2;LOC10602987816;ACTC1;CYR61;DAPK1;TNFAIP3;GRIN2A;TCP1;PIM3;PRKCQ;LOC106029353;RHOB;WNT4…
46	GO:0007154	BP	cell communication	46/ 2723	155/ 12028	0.296774	0.0420005	0.654979	gene11315;gene19671;gene8118;gene3742;gene15756;gene4367;gene9085;gene12185;gene16609;gene20028;gene7321;gene12589;gene18243;gene13189;gene12580;gene10230;gene19115;gene10798;gene7975;gene15729;gene11771;gene13258;gene9490;gene11716;gene11717;gene4973;gene1913;gene9491;gene5612;gene12509;gene16250;gene7661;gene16418;gene11699;gene6247;gene2144;gene11870;gene9039;gene10304;gene2596;gene7793;gene55…	RNF152;WNT4;SV2B;ATF3;ANXA8L156;GUCY1A3;ASNS;RIC3;ADORA2B;CHRNA2;HGF;STAMBPL189;FGF12;LOC106042065;NUAK2;GATA3;CHRNA10;WNT6;FGF10;ANXA8L129;CHRNB3;CXCL1258;LOC106037937;LOC106040406;LOC106040409;PRKAA2;MAP1LC3C;GJB3;UNC13C;WNT2B;NTRK2;ATF4;SLC8A1;FGF9;GABRB2;LOC106029819;EYA20;LOC106037440;FOS;PPRC196;SIK1;FGF7;GPNMB;CHRNA9;NIM1K;HTR1A
11	GO:0030838	BP	positive regulation of actin filament polymerization	11/ 2723	28/ 12028	0.392857	0.0423527	0.654979	gene11987;gene17622;gene6149;gene10811;gene4209;gene12024;gene13238;gene17645;gene6427;gene5162;gene17263	GSN;FMNL1;SNX9;LOC106039322;LOC106032083;LOC106040731;CXCL1238;ACTR3B;CDC42EP4;RLTPR;SPIRE2
11	GO:2001234	BP	negative regulation of apoptotic signaling pathway	11/ 2723	28/ 12028	0.392857	0.0423527	0.654979	gene10720;gene19671;gene12661;gene7321;gene1209;gene4565;gene4032;gene6326;gene18317;gene16393;gene20084	OPA1;WNT4;HSPB1;HGF;SNAI1;TNFAIP3;TCF7L2;ACKR3;SIAH2;AR;COL2A1
18	GO:0040013	BP	negative regulation of locomotion	18/ 2723	51/ 12028	0.352941	0.0423752	0.654979	gene9790;gene15613;gene1007;gene15187;gene8539;gene19382;gene5716;gene9571;gene14022;gene6562;gene17281;gene11494;gene2925;gene17324;gene19671;gene13942;gene6749;gene13515	FBLN1;RHOB;PHLDB2;SEMA7A;DCN;STC1;CPN116;ABHD6;KANK1;KNDC162;SCD81;KIF20B94;ITGB1BP1;LOC106046593;WNT4;RHOV2;PTPRM;WNT11
83	GO:0042325	BP	regulation of phosphorylation	83/ 2723	300/ 12028	0.276667	0.0424485	0.654979	gene9519;gene12268;gene5647;gene13258;gene18522;gene11436;gene3255;gene9991;gene2407;gene8200;gene3742;gene19925;gene11687;gene13513;gene3089;gene3922;gene12205;gene13559;gene16645;gene6211;gene16763;gene7321;gene5520;gene5563;gene11855;gene8326;gene6326;gene20022;gene8984;gene9532;gene18302;gene349;gene18301;gene11205;gene138;gene7975;gene12638;gene5943;gene10561;gene7378;gene12773;gene8682;gene…	CEP5519;ACVR2A;DNMBP47;CXCL1258;SFN;WNT7A;TRPV4;DEPTOR;IL6;GRB10;ATF3;TRAF4;PKIG7;UVRAG;ARHGAP1989;LOC106031806;SDC4;SPRY1;CCND3;LCP2;ITGB3;HGF;PRKAR1B;FGF7;SLC2A105;VRK2;ACKR3;PBK;CD40LG;RSPO1;PROM2;CDK1;PRNP;LOC106039769;ERCC6;FGF10;LOC106041491;CYR61;LOC106039090;IL31RA;NOTCH2;TNFSF15;SEMA7A;TNFAIP3;ANXA8L129;RET;VPS25;DSCAM;SLC38A25;BMP5;NTRK2;MECOM;DAB2IP;ITGB1BP1;AR;KNDC162;SYK;CXCL1257;PKI…
8	GO:1903510	BP	mucopolysaccharide metabolic process	8/ 2723	18/ 12028	0.444444	0.0429137	0.654979	gene8539;gene9984;gene290;gene15435;gene10226;gene10225;gene11773;gene1404	DCN;HAS2;CHST3;TMEM2;ITIH2;ITIH5;IDUA;CHST1
8	GO:1900076	BP	regulation of cellular response to insulin stimulus	8/ 2723	18/ 12028	0.444444	0.0429137	0.654979	gene16645;gene16281;gene8200;gene14022;gene10220;gene5505;gene7793;gene6420	CCND3;SLA2;GRB10;KANK1;PRKCQ;BAIAP2L1;SIK1;MSTN
43	GO:0051129	BP	negative regulation of cellular component organization	43/ 2723	143/ 12028	0.300699	0.0436866	0.654979	gene11987;gene10720;gene2495;gene8973;gene11630;gene13398;gene14118;gene12772;gene1961;gene1007;gene13411;gene9552;gene7321;gene6218;gene19150;gene14022;gene18302;gene18301;gene11205;gene13942;gene11109;gene5593;gene4952;gene15187;gene2738;gene5716;gene10811;gene3617;gene3673;gene2925;gene16393;gene3979;gene5162;gene17757;gene18685;gene9605;gene8127;gene11883;gene1430;gene13658;gene1439;gene8833;…	GSN;OPA1;KAT2B;FGF13;ITM2C;BUB1;LPAR1;SEC22B;FEZ2;PHLDB2;PTGR21;CEP5552;HGF;LOC10603787018;TTK;KANK1;PROM2;PRNP;LOC106039769;RHOV2;HSPA8;LOC106033657;LOC1060339722;SEMA7A;TMEM67;CPN116;LOC106039322;PLEKHH2;NEK2;ITGB1BP1;AR;CDHR19;RLTPR;BUB1B;AICDA;MCM2;RGMA;CHEK1;PACSIN3;ARHGAP6;LOC1060464399;HSPA2;LIMA1
16	GO:0002793	BP	positive regulation of peptide secretion	16/ 2723	44/ 12028	0.363636	0.044681	0.654979	gene13258;gene12651;gene11169;gene16574;gene12195;gene3255;gene4032;gene12495;gene2407;gene13257;gene7519;gene9649;gene2975;gene15729;gene13411;gene11870	CXCL1258;RASL10B;IL18;MARCH874;LOC106040927;TRPV4;TCF7L2;PTPN22;IL6;CXCL1257;IGF1;BLK;VSNL1;ANXA8L129;PTGR21;EYA20
16	GO:2000146	BP	negative regulation of cell motility	16/ 2723	44/ 12028	0.363636	0.044681	0.654979	gene15613;gene9790;gene19671;gene8539;gene19382;gene17281;gene5716;gene9571;gene14022;gene6749;gene11494;gene2925;gene6562;gene17324;gene1007;gene13515	RHOB;FBLN1;WNT4;DCN;STC1;SCD81;CPN116;ABHD6;KANK1;PTPRM;KIF20B94;ITGB1BP1;KNDC162;LOC106046593;PHLDB2;WNT11
23	GO:0072503	BP	cellular divalent inorganic cation homeostasis	23/ 2723	70/ 12028	0.328571	0.0451684	0.654979	gene3255;gene13572;gene17316;gene20364;gene7870;gene15867;gene13258;gene19382;gene15729;gene12427;gene5713;gene2105;gene6815;gene13257;gene14055;gene14052;gene14053;gene14118;gene5577;gene7661;gene10578;gene16801;gene17531	TRPV4;TRPC3;EDN2;MOCS14;AGTR1;LOC10604815367;CXCL1258;STC1;ANXA8L129;GRIN2A;CIB2;ADCY5;ATP7B;CXCL1257;GPR174;LPAR4;LOC106042993;LPAR1;SLC24A5;ATF4;CHRNA9;PRKCB;PTH1R
180	GO:0032501	BP	multicellular organismal process	180/ 2723	699/ 12028	0.257511	0.0452236	0.654979	gene11359;gene8973;gene4411;gene6272;gene16220;gene4367;gene3889;gene16171;gene5173;gene14167;gene19675;gene1463;gene18014;gene7491;gene17316;gene20064;gene18301;gene3476;gene2088;gene9164;gene18636;gene13258;gene12651;gene14419;gene4973;gene1901;gene13257;gene2105;gene7661;gene11855;gene12816;gene2864;gene5563;gene8300;gene13382;gene1672;gene10454;gene9713;gene7410;gene10004;gene12268;gene3187;g…	HSPD1;FGF13;NPY1R;SLC26A2;DKK2;GUCY1A3;IRF7;FZD8;E2F4;CREB3L17;CLDN19;ALX4;FANCC;P2RY8;EDN2;KCNIP2064;PRNP;SERPIND1;TFCP2L1;DSG2;CNTNAP1;CXCL1258;RASL10B;HOMER2;PRKAA2;LOC1060298781;CXCL1257;ADCY5;ATF4;SLC2A105;LOC106041556;SULF1;FGF7;LOC106036638;PAX1;CSRP2;EBF3;PLA2G7;HTR1A;EXT1;ACVR2A;PTN;SFN;CHGA;SYNM;F3;COL2A1;JCHAIN;SPRY1;ADORA2B;OTX1;PRKAR1B;SFRP4;MSX1;AGTR2;B3GNT2;BHLHE40;SOAT1;LOC1060361…
26	GO:0044282	BP	small molecule catabolic process	26/ 2723	81/ 12028	0.320988	0.0458281	0.654979	gene17125;gene3122;gene5309;gene18932;gene18134;gene6855;gene8560;gene19149;gene11773;gene5942;gene5718;gene7627;gene5923;gene652;gene3637;gene7523;gene15435;gene4279;gene5068;gene8482;gene20429;gene7215;gene4620;gene16925;gene12624;gene576	GLDC;CECR1;GCSH;HSD17B4;LOC106047481;HTR2A;AMDHD1;BCKDHB;IDUA;DDAH1;CPN118;GCAT;LOC106033995;QDPR;HAAO;SYNE33;TMEM2;CRTAC179;LOC106033086;PLA1A2;KCNIP2429;ACOX2;DDO;PPARD;GUSB;ACOX3
26	GO:0007156	BP	homophilic cell adhesion via plasma membrane adhesion molecules	26/ 2723	81/ 12028	0.320988	0.0458281	0.654979	gene11197;gene2722;gene16880;gene6749;gene12221;gene4870;gene20006;gene20353;gene20350;gene19911;gene9163;gene9162;gene9164;gene397;gene19975;gene421;gene11875;gene13549;gene15768;gene20156;gene6166;gene7829;gene8958;gene17324;gene12123;gene17323	DSCAML1;LOC106030627;LOC106046116;PTPRM;PCDH18;FAT2;LOC106049502;LOC106049866;LOC106049863;SDK2;LOC106037566;LOC106037565;DSG2;CDHR1;LOC106049466;RET;ROBO4;FAT4;CDH13;LOC106049646;LOC106034313;DSCAM;PCDH19;LOC106046593;CDH4;LOC106046592
43	GO:0070201	BP	regulation of establishment of protein localization	43/ 2723	145/ 12028	0.296552	0.0459116	0.654979	gene14934;gene18522;gene3255;gene777;gene3700;gene2407;gene15442;gene2636;gene4347;gene2975;gene13411;gene2480;gene11169;gene3800;gene20823;gene4032;gene8984;gene7874;gene18301;gene11205;gene10561;gene13258;gene16574;gene20631;gene20630;gene15729;gene13257;gene2105;gene10955;gene2925;gene11870;gene4021;gene7519;gene1172;gene12858;gene12495;gene4565;gene8304;gene8301;gene3857;gene17324;gene8228;ge…	NDFIP2;SFN;TRPV4;CHGA;TLR5;IL6;ANXA1;RAB23;LOC106032265;VSNL1;PTGR21;DPH3;IL18;ARG2;LOC106029694;TCF7L2;CD40LG;LOC106036167;PRNP;LOC106039769;LOC106039090;CXCL1258;MARCH874;KCNIP2631;KCNIP2630;ANXA8L129;CXCL1257;ADCY5;TCP1;ITGB1BP1;EYA20;ADRA2A;IGF1;HNF4A;IL1R2;PTPN22;TNFAIP3;XPO1;CCT4;PRKD1;LOC106046593;PTPN218;BLK
10	GO:0007052	BP	mitotic spindle organization	10/ 2723	24/ 12028	0.416667	0.0459379	0.654979	gene2690;gene9552;gene1261;gene18427;gene6723;gene10399;gene3673;gene12315;gene2190;gene86	ARHGEF10;CEP5552;AURKA;NFKB227;NDC80;LOC106039004;NEK2;SBDS;SPC25;KIF11
10	GO:0070167	BP	regulation of biomineral tissue development	10/ 2723	24/ 12028	0.416667	0.0459379	0.654979	gene12268;gene19671;gene16576;gene19704;gene7661;gene1800;gene10798;gene3187;gene16418;gene5943	ACVR2A;WNT4;MARCH876;OMD;ATF4;ANO6;WNT6;PTN;SLC8A1;CYR61
10	GO:0110149	BP	regulation of biomineralization	10/ 2723	24/ 12028	0.416667	0.0459379	0.654979	gene12268;gene19671;gene16576;gene19704;gene7661;gene1800;gene10798;gene3187;gene16418;gene5943	ACVR2A;WNT4;MARCH876;OMD;ATF4;ANO6;WNT6;PTN;SLC8A1;CYR61
10	GO:0045778	BP	positive regulation of ossification	10/ 2723	24/ 12028	0.416667	0.0459379	0.654979	gene12268;gene19671;gene9031;gene2407;gene15756;gene3857;gene3187;gene1800;gene16418;gene5943	ACVR2A;WNT4;GDPD2;IL6;ANXA8L156;PRKD1;PTN;ANO6;SLC8A1;CYR61
219	GO:0065008	BP	regulation of biological quality	219/ 2723	862/ 12028	0.25406	0.0470663	0.654979	gene11987;gene15613;gene11359;gene8973;gene14361;gene826;gene1394;gene15810;gene4411;gene4209;gene4361;gene4367;gene14089;gene3922;gene5173;gene15274;gene1468;gene20;gene9769;gene8472;gene18014;gene9552;gene7491;gene9571;gene17316;gene13238;gene20064;gene16539;gene18301;gene3476;gene1662;gene15867;gene11109;gene9164;gene18636;gene5733;gene12651;gene14419;gene4973;gene16999;gene1172;gene13257;gene…	GSN;RHOB;HSPD1;FGF13;TRIM71;KCNK10;RHOV;LOC10604815310;NPY1R;LOC106032083;RBM46;GUCY1A3;GRIN3A;LOC106031806;E2F4;SLC2A5;HSD17B12;KCNIP2;LOC106038244;CRHR2;FANCC;CEP5552;P2RY8;ABHD6;EDN2;CXCL1238;KCNIP2064;MARCH839;PRNP;SERPIND1;SYT1;LOC10604815367;HSPA8;DSG2;CNTNAP1;SERPING1;RASL10B;HOMER2;PRKAA2;SNCAIP;HNF4A;CXCL1257;PLEKHH2;ADCY5;CIDEA;PDIA2;RLTPR;LOC106033135;IGF1;ACOX2;LOC1060407007;FITM2;CP;…
92	GO:0010941	BP	regulation of cell death	92/ 2723	339/ 12028	0.271386	0.0481984	0.654979	gene11359;gene17471;gene2407;gene2765;gene9085;gene10720;gene1463;gene3800;gene13238;gene18300;gene18301;gene13258;gene4973;gene3047;gene7661;gene7215;gene16473;gene12494;gene12081;gene20013;gene12661;gene18522;gene3742;gene12305;gene20084;gene1485;gene9021;gene4032;gene14384;gene8705;gene5598;gene17686;gene15729;gene2519;gene349;gene1209;gene10080;gene4580;gene6326;gene4693;gene606;gene6247;gene…	HSPD1;SOCS3;IL6;RIPK2;ASNS;OPA1;ALX4;ARG2;CXCL1238;RASSF2;PRNP;CXCL1258;PRKAA2;ARHGAP1947;ATF4;ACOX2;ANGPTL4;BCL2L15;EEF1A2;ZNF346;HSPB1;SFN;ATF3;LOC106041090;COL2A1;RAG1;AGTR2;TCF7L2;BCL2A1;TOR4A;LOC106033662;TRAF3;ANXA8L129;RARB;CDK1;SNAI1;XIAP;CITED2;ACKR3;EGR1;MSX1;GABRB2;IL7R;MSH2;LOC106048637;HGF;DCUN1D3;AMIGO2;LOC10602987816;ACTC1;CYR61;DAPK1;TNFAIP3;GRIN2A;TCP1;PIM3;PRKCQ;LOC106029353;RHO…
16	GO:0010810	BP	regulation of cell-substrate adhesion	16/ 2723	45/ 12028	0.355556	0.0482592	0.654979	gene9790;gene7326;gene12800;gene19671;gene16763;gene19706;gene14022;gene7610;gene937;gene15751;gene13658;gene2925;gene11205;gene1007;gene5943;gene15768	FBLN1;SEMA3E;MYOC;WNT4;ITGB3;ECM2;KANK1;RAC2;COL8A1;BCL6;ARHGAP6;ITGB1BP1;LOC106039769;PHLDB2;CYR61;CDH13
12	GO:0050870	BP	positive regulation of T cell activation	12/ 2723	31/ 12028	0.387097	0.0495888	0.654979	gene14139;gene11359;gene1485;gene15810;gene8984;gene2407;gene10230;gene10220;gene8030;gene15442;gene12495;gene2315	CBFB;HSPD1;RAG1;LOC10604815310;CD40LG;IL6;GATA3;PRKCQ;IL7R;ANXA1;PTPN22;LOC106030066
12	GO:0007059	BP	chromosome segregation	12/ 2723	31/ 12028	0.387097	0.0495888	0.654979	gene17751;gene18427;gene8931;gene6723;gene19150;gene5305;gene14477;gene2496;gene3673;gene13513;gene20369;gene2190	KNSTRN;NFKB227;SKA1;NDC80;TTK;CENPN;VSTM477;SGOL1;NEK2;UVRAG;INCENP;SPC25
12	GO:1903039	BP	positive regulation of leukocyte cell-cell adhesion	12/ 2723	31/ 12028	0.387097	0.0495888	0.654979	gene14139;gene11359;gene1485;gene15810;gene8984;gene2407;gene10230;gene10220;gene8030;gene15442;gene12495;gene2315	CBFB;HSPD1;RAG1;LOC10604815310;CD40LG;IL6;GATA3;PRKCQ;IL7R;ANXA1;PTPN22;LOC106030066
3	GO:0036038	CC	MKS complex	3/ 2723	4/ 12028	0.75	0.0385048	0.654979	gene16446;gene3307;gene2738	TMEM17;TCTN1;TMEM67
3	GO:0034464	CC	BBSome	3/ 2723	4/ 12028	0.75	0.0385048	0.654979	gene14133;gene819;gene13573	BBS2;TTC8;BBS7
3	GO:0099523	CC	presynaptic cytosol	3/ 2723	4/ 12028	0.75	0.0385048	0.654979	gene11109;gene16801;gene10428	HSPA8;PRKCB;CTBP2
3	GO:0099522	CC	region of cytosol	3/ 2723	4/ 12028	0.75	0.0385048	0.654979	gene11109;gene16801;gene10428	HSPA8;PRKCB;CTBP2
3	GO:0000783	CC	nuclear telomere cap complex	3/ 2723	4/ 12028	0.75	0.0385048	0.654979	gene3979;gene6619;gene5161	CDHR19;TEN1;LOC106033135
3	GO:0000782	CC	telomere cap complex	3/ 2723	4/ 12028	0.75	0.0385048	0.654979	gene3979;gene6619;gene5161	CDHR19;TEN1;LOC106033135
3	GO:0045178	CC	basal part of cell	3/ 2723	4/ 12028	0.75	0.0385048	0.654979	gene6346;gene18293;gene18649	FN1;GKN2;PRCP
8	GO:0005604	CC	basement membrane	8/ 2723	18/ 12028	0.444444	0.0429137	0.654979	gene9790;gene15122;gene5330;gene15757;gene18301;gene6346;gene20084;gene3981	FBLN1;LOC106044084;LOC1060333280;ANXA8L157;PRNP;FN1;COL2A1;COL17A1
6	GO:0005158	MF	insulin receptor binding	6/ 2723	12/ 12028	0.5	0.0346763	0.654979	gene7519;gene7933;gene8200;gene10060;gene15402;gene18181	IGF1;IRS1;GRB10;IRS4;IRS2;LOC106047531
6	GO:0140326	MF	ATPase-coupled intramembrane lipid transporter activity	6/ 2723	12/ 12028	0.5	0.0346763	0.654979	gene1229;gene15833;gene16511;gene20113;gene7455;gene6251	ATP9A;LOC10604815333;MARCH811;LOC106049613;BDKRB15;ATP10B
6	GO:0004602	MF	glutathione peroxidase activity	6/ 2723	12/ 12028	0.5	0.0346763	0.654979	gene5015;gene4862;gene20035;gene4834;gene12380;gene3090	GPX7;GPX3;CLIC2;LOC106032894;ALOX5AP;ARHGAP1990
9	GO:0004181	MF	metallocarboxypeptidase activity	9/ 2723	21/ 12028	0.428571	0.0357449	0.654979	gene4424;gene10169;gene14255;gene10171;gene57;gene1718;gene20694;gene6070;gene20693	CPE;LOC106038763;CPXM1;LOC106038694;CPN1;CPM;LOC106029558;LOC106034162;LOC106029557
95	GO:0030234	MF	enzyme regulator activity	95/ 2723	347/ 12028	0.273775	0.0370526	0.654979	gene11984;gene8973;gene19390;gene11989;gene11906;gene9578;gene11981;gene6174;gene3476;gene17406;gene5733;gene17377;gene13149;gene760;gene12254;gene7598;gene2822;gene9790;gene10548;gene8307;gene16473;gene5872;gene3187;gene12661;gene16856;gene5524;gene16281;gene2955;gene5520;gene1168;gene18701;gene11205;gene14784;gene15729;gene1853;gene5452;gene2591;gene4318;gene20037;gene10080;gene13658;gene12380;…	C5;FGF13;DOCK5;DAB2IP;APLP2;CEP5578;PHF19;ARAP3;SERPIND1;TBC1D9;SERPING1;COL6A6;PRKAR2B;LOC106036374;ARHGAP15;LOC1060337568;PKIA;FBLN1;LOC106039127;AHSA2;ANGPTL4;CDC20;PTN;HSPB1;PPP1R3B;ADAP1;SLA2;TRIB2;PRKAR1B;PKIG;LOC106048083;LOC106039769;RAP1GAP2;ANXA8L129;SIPA1L2;GPRC5B;PPRC191;ARHGAP10;KCNIP2037;XIAP;ARHGAP6;ALOX5AP;ERCC673;LOC106034274;LOC106032659;MYO9B;RCAN1;LOC106030932;BAG2;CDKN2C;ARHG…
3	GO:0061778	MF	intracellular chloride channel activity	3/ 2723	4/ 12028	0.75	0.0385048	0.654979	gene14354;gene5949;gene5948	ANO10;LOC106034007;LOC106034001
3	GO:0016723	MF	oxidoreductase activity, oxidizing metal ions, NAD or NADP as acceptor	3/ 2723	4/ 12028	0.75	0.0385048	0.654979	gene5091;gene2218;gene11065	MMACHC;LOC106029992;STEAP2
3	GO:0004065	MF	arylsulfatase activity	3/ 2723	4/ 12028	0.75	0.0385048	0.654979	gene1192;gene6451;gene2864	SULF2;ARSG;SULF1
3	GO:0003997	MF	acyl-CoA oxidase activity	3/ 2723	4/ 12028	0.75	0.0385048	0.654979	gene8482;gene7215;gene576	PLA1A2;ACOX2;ACOX3
3	GO:0070915	MF	lysophosphatidic acid receptor activity	3/ 2723	4/ 12028	0.75	0.0385048	0.654979	gene19987;gene14052;gene14118	LPAR2;LPAR4;LPAR1
3	GO:0022841	MF	potassium ion leak channel activity	3/ 2723	4/ 12028	0.75	0.0385048	0.654979	gene11778;gene1863;gene826	TMEM175;KCNK1;KCNK10
3	GO:0030547	MF	receptor inhibitor activity	3/ 2723	4/ 12028	0.75	0.0385048	0.654979	gene20213;gene13318;gene564	IL1B;LOC106042178;DNMBP4
3	GO:0005229	MF	intracellular calcium activated chloride channel activity	3/ 2723	4/ 12028	0.75	0.0385048	0.654979	gene14354;gene5949;gene5948	ANO10;LOC106034007;LOC106034001
3	GO:0035325	MF	Toll-like receptor binding	3/ 2723	4/ 12028	0.75	0.0385048	0.654979	gene2836;gene11888;gene10561	LY96;TIRAP;LOC106039090
[truncated: 2 more rows]
