# Supplementary material for: Transcriptome Profiling Unveils Key Genes Regulating the Growth and Development of Yangzhou Goose Knob
Source: Int J Mol Sci. 2024 Apr 10;25(8):4166. doi: 10.3390/ijms25084166 (PMC11050116; doi:10.3390/ijms25084166)
Supplement: Supplementary file 1 [file ijms-25-04166-s001.zip › Table S5.xlsx]

## Sheet: Guide
Table S5.GO/KEGG of DEGs
Guide
120vs300-KEGG	KEGG of DEGs in 120 VS 300
70vs300-KEGG	KEGG of DEGs in 70 VS 300
70vs120-KEGG	KEGG of DEGs in 70 VS 120
70vs120-GO	GO of DEGs in 70 VS 120
120vs300-GO	GO of DEGs in 120 VS 300
70vs300-GO	GO of DEGs in 70 VS 300

## Sheet: 120vs300-KEGG
Num	Pathway id	Description	Database	Ratio_in_study	Ratio_in_pop	Pvalue	Padjust	First Category	Second Category	Gene_ids	Gene_names
29	map05340	Primary immunodeficiency	KEGG PATHWAY	29/1553	39/11318	1.20849e-17	3.83091e-15	Human Diseases	Immune disease	gene20665|gene12437|gene8030|gene497|gene496|gene17853|gene18816|gene1484|gene1485|gene8984|gene76|gene1626|gene18476|gene20396|gene20397|gene14433|gene11186|gene11185|gene20398|gene9042|gene4226|gene18968|gene18685|gene9468|gene9293|gene20401|gene13131|gene2315|gene20641	LOC106029527;CIITA;IL7R;CD8A;LOC106033965;CD40;LOC106048210;RAG2;RAG1;CD40LG;BLNK;TNFRSF13C;NFKB276;LOC106049916;LOC106049912;LOC106043396;CD3E;CD3D;LOC106049913;IL2RG;TNFRSF13B;ZAP70;AICDA;LCK;GPR1613;LOC106049915;PTPRC;LOC106030066;LOC106029502
50	map04514	Cell adhesion molecules (CAMs)	KEGG PATHWAY	50/1553	141/11318	4.91984e-11	7.79794e-09	Environmental Information Processing	Signaling molecules and interaction	gene19675|gene19394|gene3276|gene1822|gene15079|gene6749|gene497|gene496|gene17853|gene14630|gene7499|gene1063|gene14249|gene12586|gene12585|gene15210|gene8984|gene12538|gene6138|gene18476|gene15491|gene16782|gene20127|gene20407|gene18636|gene12755|gene20631|gene20630|gene19621|gene16356|gene20840|gene15745|gene17323|gene17136|gene13103|gene10829|gene17135|gene20306|gene5867|gene19271|gene19270|g…	CLDN19;LRRC4;SELPLG;CNTN1;NTNG2;PTPRM;CD8A;LOC106033965;CD40;NEGR1;CD99;CD2;LOC106043214;NFASC;CNTN2;CD276;CD40LG;CD34;CLDN20;NFKB276;LOC106044537;LOC106045971;LRRC4B;LOC106049920;CNTNAP1;LOC106041540;LOC106029493;LOC106029492;MADCAM1;ITGA9;LOC10603007840;PDCD1;LOC106046592;LOC106046390;NTNG1;VCAM1;PDCD1LG2;LOC106049813;PTPRF;PIK3AP171;PIK3AP170;CD226;PTPRC;LOC106049922;CD28;CDH4;LOC106030066;CTL…
40	map04064	NF-kappa B signaling pathway	KEGG PATHWAY	40/1553	114/11318	5.97049e-09	6.30882e-07	Environmental Information Processing	Signal transduction	gene17686|gene20665|gene16487|gene15810|gene16782|gene14384|gene3669|gene17853|gene11888|gene2836|gene6887|gene10253|gene8744|gene4181|gene8984|gene76|gene19270|gene1626|gene465|gene10829|gene20396|gene20397|gene12290|gene16801|gene14433|gene20398|gene3891|gene16004|gene18968|gene14034|gene184|gene208|gene9468|gene19271|gene10220|gene9293|gene20401|gene19163|gene19162|gene10479	TRAF3;LOC106029527;LOC106045683;LOC10604815310;LOC106045971;BCL2A1;TRAF5;CD40;TIRAP;LY96;TNFSF11;NFKBIA;TRAF2;CARD11;CD40LG;BLNK;PIK3AP170;TNFRSF13C;PLAU;VCAM1;LOC106049916;LOC106049912;LOC106041041;PRKCB;LOC106043396;LOC106049913;PIDD1;SYK;ZAP70;EDA;NFKB2;LOC106030078;LCK;PIK3AP171;PRKCQ;GPR1613;LOC106049915;LOC106048600;LOC106048595;LYN
30	map05150	Staphylococcus aureus infection	KEGG PATHWAY	30/1553	76/11318	2.18158e-08	1.7289e-06	Human Diseases	Infectious disease: bacterial	gene20665|gene16782|gene11570|gene11984|gene19271|gene20338|gene18595|gene18594|gene20066|gene20067|gene20069|gene12730|gene18599|gene12732|gene20396|gene20397|gene12755|gene18591|gene14433|gene19609|gene20398|gene20840|gene3276|gene19270|gene20401|gene20407|gene20405|gene9668|gene18600|gene2370	LOC106029527;LOC106045971;MASP2;C5;PIK3AP171;LOC106049849;LOC106048012;LOC106048010;LOC106049570;KRT23;LOC106049573;LOC106041557;LOC106048011;CFH;LOC106049916;LOC106049912;LOC106041540;LOC106047977;LOC106043396;LOC106049106;LOC106049913;LOC10603007840;SELPLG;PIK3AP170;LOC106049915;LOC106049920;LOC106049922;LOC106038139;LOC106047979;ITGB2
32	map04662	B cell receptor signaling pathway	KEGG PATHWAY	32/1553	85/11318	2.87244e-08	1.82113e-06	Organismal Systems	Immune system	gene20665|gene16487|gene2012|gene76|gene192|gene7610|gene14041|gene17608|gene10253|gene4181|gene8078|gene9821|gene20396|gene20397|gene13709|gene14433|gene20631|gene20630|gene15282|gene19959|gene20398|gene16004|gene208|gene10304|gene14042|gene18727|gene9293|gene20401|gene16801|gene11669|gene10479|gene18465	LOC106029527;LOC106045683;NFKBIE;BLNK;PIK3AP1;BLNK10;CHST11;CD79B;NFKBIA;CARD11;CD72;NFATC1;LOC106049916;LOC106049912;CD81;LOC106043396;LOC106029493;LOC106029492;PIK3CD;LOC106049445;LOC106049913;SYK;LOC106030078;FOS;CHST12;DAPP1;GPR1613;LOC106049915;PRKCB;INPP5D;LYN;NFKB265
57	map04060	Cytokine-cytokine receptor interaction	KEGG PATHWAY	57/1553	205/11318	7.06224e-08	3.73122e-06	Environmental Information Processing	Signaling molecules and interaction	gene9866|gene11193|gene11543|gene15810|gene12787|gene11238|gene923|gene7487|gene8030|gene4107|gene19844|gene19845|gene17853|gene15257|gene14612|gene8503|gene10735|gene6887|gene12998|gene10215|gene16832|gene1626|gene16831|gene9415|gene9414|gene13967|gene5185|gene9042|gene12638|gene2120|gene8681|gene9867|gene12290|gene12791|gene17390|gene9868|gene9869|gene2646|gene5402|gene4226|gene18476|gene6420|g…	CXCR6;IL10RA;TNFRSF1B;LOC10604815310;TNFSF4;CXCR5;LOC106038263;LOC106035752;IL7R;TNFSF10;LOC106049328;LOC106049327;CD40;TNFRSF18;IL12RB2;ACVR2B;CXCR4;TNFSF11;CCR4;IL2RA;LOC106046046;TNFRSF13C;IL21R;IL22RA1;IFNLR1;INHBA;LOC106033294;IL2RG;LOC106041491;LOC106029911;TNFSF8;XCR1;LOC106041041;FASLG;ACKR4;LOC106038377;LOC106038356;BMP5;HAUS32;TNFRSF13B;NFKB276;MSTN;LOC106041040;TNFRSF25;EDA;CX3CR1;BLNK…
30	map04658	Th1 and Th2 cell differentiation	KEGG PATHWAY	30/1553	87/11318	7.17515e-07	3.24932e-05	Organismal Systems	Immune system	gene19270|gene2012|gene16782|gene14612|gene18816|gene10253|gene10215|gene10230|gene9821|gene6031|gene9042|gene700|gene12773|gene11186|gene11185|gene20840|gene18476|gene1052|gene18968|gene7606|gene208|gene10304|gene19271|gene10220|gene9404|gene20407|gene20405|gene11335|gene9468|gene11333	PIK3AP170;NFKBIE;LOC106045971;IL12RB2;LOC106048210;NFKBIA;IL2RA;GATA3;NFATC1;MAML2;IL2RG;RBPJ;NOTCH2;CD3E;CD3D;LOC10603007840;NFKB276;CD247;ZAP70;BLNK06;LOC106030078;FOS;PIK3AP171;PRKCQ;RUNX3;LOC106049920;LOC106049922;STAT4;LCK;STAT1
22	map04672	Intestinal immune network for IgA production	KEGG PATHWAY	22/1553	54/11318	8.65107e-07	3.42799e-05	Organismal Systems	Immune system	gene20665|gene15810|gene16782|gene17853|gene4226|gene8984|gene1626|gene20396|gene20397|gene14433|gene10735|gene19621|gene20398|gene20840|gene18685|gene19271|gene19270|gene20401|gene20407|gene20405|gene2313|gene2315	LOC106029527;LOC10604815310;LOC106045971;CD40;TNFRSF13B;CD40LG;TNFRSF13C;LOC106049916;LOC106049912;LOC106043396;CXCR4;MADCAM1;LOC106049913;LOC10603007840;AICDA;PIK3AP171;PIK3AP170;LOC106049915;LOC106049920;LOC106049922;CD28;LOC106030066
30	map05323	Rheumatoid arthritis	KEGG PATHWAY	30/1553	90/11318	1.62416e-06	5.72066e-05	Human Diseases	Immune disease	gene12292|gene20665|gene15810|gene16782|gene3373|gene4347|gene6887|gene14247|gene14433|gene20401|gene19789|gene12638|gene20396|gene20397|gene20823|gene20398|gene20840|gene2944|gene10304|gene19271|gene19270|gene15892|gene5185|gene20407|gene6007|gene20405|gene6009|gene2313|gene2314|gene2370	LOC106041040;LOC106029527;LOC10604815310;LOC106045971;TCTN2;LOC106032265;TNFSF11;ATP6V1B1;LOC106043396;LOC106049915;LOC10603419789;LOC106041491;LOC106049916;LOC106049912;LOC10603007823;LOC106049913;LOC10603007840;ATP6V1C2;FOS;PIK3AP171;PIK3AP170;LOC106044971;LOC106033294;LOC106049920;LOC106034136;LOC106049922;EVC9;CD28;CTLA4;ITGB2
30	map05322	Systemic lupus erythematosus	KEGG PATHWAY	30/1553	93/11318	3.50034e-06	0.000110961	Human Diseases	Immune disease	gene20665|gene16782|gene11984|gene17853|gene1583|gene1582|gene1587|gene19270|gene9861|gene20338|gene1566|gene8984|gene20120|gene1569|gene1571|gene20396|gene20397|gene14433|gene20398|gene20840|gene8002|gene18723|gene19271|gene1575|gene20401|gene1570|gene20407|gene20405|gene2313|gene1578	LOC106029527;LOC106045971;C5;CD40;LOC1060481533;LOC1060481532;LOC1060481537;PIK3AP170;SNRPD1;LOC106049849;LOC106045814;CD40LG;LOC106049629;LOC106045823;LOC106045128;LOC106049916;LOC106049912;LOC106043396;LOC106049913;LOC10603007840;C7;LOC106048111;PIK3AP171;LOC106045840;LOC106049915;LOC106045851;LOC106049920;LOC106049922;CD28;LOC106045890
29	map04640	Hematopoietic cell lineage	KEGG PATHWAY	29/1553	89/11318	4.04507e-06	0.000116571	Organismal Systems	Immune system	gene20665|gene8030|gene497|gene496|gene1063|gene18876|gene7346|gene10215|gene16832|gene12538|gene11186|gene18476|gene20396|gene20397|gene14433|gene20631|gene20630|gene11185|gene12357|gene20398|gene20840|gene17801|gene1497|gene20593|gene7487|gene20401|gene19161|gene20407|gene20405	LOC106029527;IL7R;CD8A;LOC106033965;CD2;ACTN26;ITGA2;IL2RA;LOC106046046;CD34;CD3E;NFKB276;LOC106049916;LOC106049912;LOC106043396;LOC106029493;LOC106029492;CD3D;FLT3;LOC106049913;LOC10603007840;LOC106047112;LOC106044451;LOC106029451;LOC106035752;LOC106049915;IL11RA;LOC106049920;LOC106049922
14	map05310	Asthma	KEGG PATHWAY	14/1553	28/11318	4.81008e-06	0.000127066	Human Diseases	Immune disease	gene20396|gene20397|gene20665|gene14433|gene16782|gene20840|gene20398|gene19271|gene19270|gene8984|gene20401|gene20407|gene20405|gene17853	LOC106049916;LOC106049912;LOC106029527;LOC106043396;LOC106045971;LOC10603007840;LOC106049913;PIK3AP171;PIK3AP170;CD40LG;LOC106049915;LOC106049920;LOC106049922;CD40
18	map05320	Autoimmune thyroid disease	KEGG PATHWAY	18/1553	46/11318	1.66076e-05	0.00040497	Human Diseases	Immune disease	gene20396|gene20397|gene20665|gene14433|gene16782|gene20840|gene20398|gene2314|gene19271|gene15495|gene8984|gene20401|gene20407|gene20405|gene17853|gene2313|gene12791|gene19270	LOC106049916;LOC106049912;LOC106029527;LOC106043396;LOC106045971;LOC10603007840;LOC106049913;CTLA4;PIK3AP171;TSHR;CD40LG;LOC106049915;LOC106049920;LOC106049922;CD40;CD28;FASLG;PIK3AP170
16	map05330	Allograft rejection	KEGG PATHWAY	16/1553	40/11318	3.53784e-05	0.000747663	Human Diseases	Immune disease	gene20396|gene20397|gene20665|gene14433|gene16782|gene20840|gene20398|gene19271|gene19270|gene8984|gene20401|gene20407|gene20405|gene17853|gene2313|gene12791	LOC106049916;LOC106049912;LOC106029527;LOC106043396;LOC106045971;LOC10603007840;LOC106049913;PIK3AP171;PIK3AP170;CD40LG;LOC106049915;LOC106049920;LOC106049922;CD40;CD28;FASLG
32	map04660	T cell receptor signaling pathway	KEGG PATHWAY	32/1553	113/11318	3.42469e-05	0.000775447	Organismal Systems	Immune system	gene19270|gene16487|gene2012|gene16782|gene497|gene496|gene6211|gene10253|gene4181|gene8984|gene9821|gene18476|gene15282|gene11186|gene11185|gene17756|gene19959|gene15745|gene7668|gene1052|gene18968|gene208|gene2315|gene10304|gene2314|gene19271|gene10220|gene13131|gene2313|gene4906|gene9468|gene18465	PIK3AP170;LOC106045683;NFKBIE;LOC106045971;CD8A;LOC106033965;LCP2;NFKBIA;CARD11;CD40LG;NFATC1;NFKB276;PIK3CD;CD3E;CD3D;PAK6;LOC106049445;PDCD1;BLNK68;CD247;ZAP70;LOC106030078;LOC106030066;FOS;CTLA4;PIK3AP171;PRKCQ;PTPRC;CD28;ITK;LCK;NFKB265
41	map04062	Chemokine signaling pathway	KEGG PATHWAY	41/1553	163/11318	6.31038e-05	0.00125024	Organismal Systems	Immune system	gene9866|gene11238|gene923|gene19844|gene19845|gene556|gene18816|gene7610|gene20029|gene6216|gene10253|gene12998|gene17812|gene14267|gene12638|gene16183|gene12292|gene9867|gene12290|gene19163|gene10735|gene19959|gene9868|gene5926|gene12339|gene10970|gene9869|gene20461|gene15282|gene12997|gene208|gene4906|gene3569|gene5185|gene16801|gene19162|gene9870|gene20074|gene13875|gene10479|gene11333	CXCR6;CXCR5;LOC106038263;LOC106049328;LOC106049327;GRK4;LOC106048210;BLNK10;PTK2B;DOCK2;NFKBIA;CCR4;HCK;LOC106043193;LOC106041491;PARD3;LOC106041040;XCR1;LOC106041041;LOC106048600;CXCR4;LOC106049445;LOC106038377;GNG5;NCF1;ADCY7;LOC106038356;ADRBK1;PIK3CD;CX3CR1;LOC106030078;ITK;PXN;LOC106033294;PRKCB;LOC106048595;LOC106038357;CCR7;ERCC675;LYN;STAT1
34	map04110	Cell cycle	KEGG PATHWAY	34/1553	130/11318	0.000114893	0.00214241	Cellular Processes	Cell growth and death	gene7288|gene5647|gene13574|gene2720|gene7585|gene6255|gene17183|gene5032|gene5173|gene13398|gene10098|gene16810|gene5018|gene19150|gene3455|gene9948|gene9675|gene16645|gene10737|gene8025|gene17512|gene16021|gene10599|gene18392|gene10896|gene17757|gene349|gene9605|gene18007|gene20037|gene12165|gene9911|gene11883|gene5872	ORC5;CCNB2;CCNA2;CCNE2;MCM5;PTTG1;TFDP1;CDKN2C;E2F4;BUB1;MAD2L1;PLK1;ORC1;TTK;CDC45;MYC;MCM3;CCND3;MCM6;LOC106036387;CDC25A;LOC106045119;ANAPC13;PSD92;CDC7;BUB1B;CDK1;MCM2;CDC14B;CCNB3;WEE1;MCM4;CHEK1;CDC20
26	map04650	Natural killer cell mediated cytotoxicity	KEGG PATHWAY	26/1553	90/11318	0.000126399	0.00222603	Organismal Systems	Immune system	gene20665|gene4107|gene6988|gene6211|gene7610|gene20029|gene9821|gene15282|gene20396|gene20397|gene14433|gene10078|gene12791|gene19959|gene19721|gene19720|gene20398|gene16004|gene1052|gene18968|gene15263|gene9468|gene20401|gene16801|gene18465|gene2370	LOC106029527;TNFSF10;CASP3;LCP2;BLNK10;PTK2B;NFATC1;PIK3CD;LOC106049916;LOC106049912;LOC106043396;SH2D1A;FASLG;LOC106049445;LOC10603419721;LOC10603419720;LOC106049913;SYK;CD247;ZAP70;LOC106044308;LCK;LOC106049915;PRKCB;NFKB265;ITGB2
29	map04659	Th17 cell differentiation	KEGG PATHWAY	29/1553	107/11318	0.000183432	0.0029074	Organismal Systems	Immune system	gene19270|gene2012|gene16782|gene18816|gene10253|gene10215|gene10230|gene16831|gene17700|gene18476|gene11185|gene11186|gene2120|gene14438|gene20840|gene9042|gene1052|gene18968|gene7606|gene208|gene10304|gene19271|gene10220|gene20407|gene20405|gene14856|gene9821|gene9468|gene11333	PIK3AP170;NFKBIE;LOC106045971;LOC106048210;NFKBIA;IL2RA;GATA3;IL21R;HSP90AA1;NFKB276;CD3D;CD3E;LOC106029911;RUNX1;LOC10603007840;IL2RG;CD247;ZAP70;BLNK06;LOC106030078;FOS;PIK3AP171;PRKCQ;LOC106049920;LOC106049922;RAG16;NFATC1;LCK;STAT1
23	map05416	Viral myocarditis	KEGG PATHWAY	23/1553	77/11318	0.000176232	0.0029403	Human Diseases	Cardiovascular disease	gene20665|gene16782|gene3016|gene17853|gene6988|gene7610|gene19308|gene8984|gene20396|gene20397|gene14433|gene20398|gene20840|gene4508|gene11690|gene13298|gene19271|gene19270|gene20401|gene20407|gene20405|gene2313|gene2370	LOC106029527;LOC106045971;SGCB;CD40;CASP3;BLNK10;DAG1;CD40LG;LOC106049916;LOC106049912;LOC106043396;LOC106049913;LOC10603007840;LAMA2;SGCG;LOC106042166;PIK3AP171;PIK3AP170;LOC106049915;LOC106049920;LOC106049922;CD28;ITGB2
46	map05169	Epstein-Barr virus infection	KEGG PATHWAY	46/1553	200/11318	0.000232491	0.00350951	Human Diseases	Infectious disease: viral	gene17686|gene20665|gene13574|gene16782|gene2720|gene12557|gene2012|gene3669|gene17853|gene3889|gene18816|gene16645|gene10253|gene8744|gene14433|gene76|gene9948|gene700|gene20396|gene20397|gene20823|gene11186|gene11185|gene20398|gene8025|gene20840|gene16021|gene16004|gene4347|gene18392|gene15282|gene1052|gene6988|gene1497|gene184|gene208|gene20641|gene19271|gene19270|gene9293|gene20401|gene9404|g…	TRAF3;LOC106029527;CCNA2;LOC106045971;CCNE2;IKBKE;NFKBIE;TRAF5;CD40;IRF7;LOC106048210;CCND3;NFKBIA;TRAF2;LOC106043396;BLNK;MYC;RBPJ;LOC106049916;LOC106049912;LOC10603007823;CD3E;CD3D;LOC106049913;LOC106036387;LOC10603007840;LOC106045119;SYK;LOC106032265;PSD92;PIK3CD;CD247;CASP3;LOC106044451;NFKB2;LOC106030078;LOC106029502;PIK3AP171;PIK3AP170;GPR1613;LOC106049915;RUNX3;LOC106049920;LOC106049922;LY…
18	map05144	Malaria	KEGG PATHWAY	18/1553	55/11318	0.00025024	0.00360573	Human Diseases	Infectious disease: parasitic	gene12755|gene19270|gene19549|gene7321|gene20823|gene10829|gene2370|gene13709|gene3818|gene19271|gene5391|gene8984|gene17853|gene15519|gene4347|gene16782|gene18555|gene19081	LOC106041540;PIK3AP170;LRP1;HGF;LOC10603007823;VCAM1;ITGB2;CD81;THBS1;PIK3AP171;POLN1;CD40LG;CD40;THBS2;LOC106032265;LOC106045971;COMP;MUC1
98	map05200	Pathways in cancer	KEGG PATHWAY	98/1553	513/11318	0.000317007	0.00418713	Human Diseases	Cancer: overview	gene8973|gene10062|gene15544|gene16171|gene15178|gene10215|gene2087|gene2668|gene12791|gene4080|gene14052|gene12556|gene11855|gene7519|gene4849|gene10183|gene14612|gene6346|gene16477|gene2815|gene7346|gene4032|gene15094|gene7870|gene7975|gene17686|gene12773|gene10159|gene13562|gene2120|gene14438|gene10970|gene16021|gene8006|gene2519|gene4508|gene15124|gene7606|gene184|gene9134|gene2357|gene11073|…	FGF13;COL4A6;LOC106044634;FZD8;PML;IL2RA;LOC1060300787;LOC106030437;FASLG;MECOM;LPAR4;RASSF5;WNT5A;IGF1;PDGFRB;LOC106038708;IL12RB2;FN1;LOC106045698;HEY1;ITGA2;TCF7L2;RALGDS;AGTR1;FGF10;TRAF3;NOTCH2;LEF1;FGF2;LOC106029911;RUNX1;ADCY7;LOC106045119;PTGER4;RARB;LAMA2;LAMB2;BLNK06;NFKB2;F54;FZD7;FZD1;FZD10;CCNA2;CCNE2;MGST2;IL7R;FIGF;MSH2;MMP9;LOC106048210;BLNK10;HGF;NFKBIA;CCDC6;MYC;WNT10A;IL2RG;CXC…
21	map05140	Leishmaniasis	KEGG PATHWAY	21/1553	70/11318	0.00031108	0.0042875	Human Diseases	Infectious disease: parasitic	gene20396|gene20397|gene20665|gene9470|gene13288|gene14433|gene20823|gene10253|gene20398|gene12339|gene11333|gene20840|gene20401|gene20407|gene16801|gene20405|gene7598|gene4347|gene10304|gene18465|gene2370	LOC106049916;LOC106049912;LOC106029527;MARCKSL1;LOC106042157;LOC106043396;LOC10603007823;NFKBIA;LOC106049913;NCF1;STAT1;LOC10603007840;LOC106049915;LOC106049920;PRKCB;LOC106049922;NCF4;LOC106032265;FOS;NFKB265;ITGB2
28	map04666	Fc gamma R-mediated phagocytosis	KEGG PATHWAY	28/1553	111/11318	0.000829794	0.0101171	Organismal Systems	Immune system	gene11987|gene20665|gene12024|gene7610|gene14041|gene9470|gene6216|gene14042|gene17812|gene14267|gene9061|gene20396|gene20397|gene14433|gene15282|gene19959|gene20398|gene4974|gene12339|gene16004|gene1361|gene1364|gene20401|gene13131|gene16801|gene11669|gene10022|gene10479	GSN;LOC106029527;LOC106040731;BLNK10;CHST11;MARCKSL1;DOCK2;CHST12;HCK;LOC106043193;SCIN;LOC106049916;LOC106049912;LOC106043396;PIK3CD;LOC106049445;LOC106049913;PPAP2B;NCF1;SYK;LOC106043002;LOC106040722;LOC106049915;PTPRC;PRKCB;INPP5D;LOC106038521;LYN
18	map05321	Inflammatory bowel disease (IBD)	KEGG PATHWAY	18/1553	60/11318	0.000817595	0.0103671	Human Diseases	Immune disease	gene11335|gene20823|gene20840|gene16782|gene12853|gene10230|gene3700|gene19271|gene19270|gene14612|gene16831|gene20407|gene20405|gene9821|gene9042|gene4347|gene12852|gene11333	STAT4;LOC10603007823;LOC10603007840;LOC106045971;IL18R1;GATA3;TLR5;PIK3AP171;PIK3AP170;IL12RB2;IL21R;LOC106049920;LOC106049922;NFATC1;IL2RG;LOC106032265;IL18RAP;STAT1
11	map00512	Mucin type O-glycan biosynthesis	KEGG PATHWAY	11/1553	31/11318	0.00189751	0.0222781	Metabolism	Glycan biosynthesis and metabolism	gene4888|gene2478|gene12319|gene15423|gene19260|gene19356|gene2177|gene3782|gene13994|gene13993|gene16269	GALNT10;GALNT15;WBSCR17;GCNT1;PIK3AP160;GALNT2;GALNT3;GALNT16;LOC106042924;GCNT4;TNFRSF13C9
43	map05166	Human T-cell leukemia virus 1 infection	KEGG PATHWAY	43/1553	203/11318	0.00213128	0.0241292	Human Diseases	Infectious disease: viral	gene13574|gene16782|gene2464|gene2720|gene5700|gene17853|gene6255|gene5032|gene18816|gene19271|gene10098|gene10253|gene10215|gene9948|gene1626|gene9821|gene11894|gene9042|gene11185|gene16645|gene11186|gene2120|gene10970|gene20840|gene16021|gene18476|gene18392|gene15282|gene17757|gene7606|gene184|gene208|gene10304|gene2495|gene11883|gene8304|gene19270|gene20407|gene20405|gene1439|gene5872|gene9468…	CCNA2;LOC106045971;CREB5;CCNE2;TLN2;CD40;PTTG1;CDKN2C;LOC106048210;PIK3AP171;MAD2L1;NFKBIA;IL2RA;MYC;TNFRSF13C;NFATC1;ETS1;IL2RG;CD3D;CCND3;CD3E;LOC106029911;ADCY7;LOC10603007840;LOC106045119;NFKB276;PSD92;PIK3CD;BUB1B;BLNK06;NFKB2;LOC106030078;FOS;KAT2B;CHEK1;XPO1;PIK3AP170;LOC106049920;LOC106049922;SPI1;CDC20;LCK;ITGB2
35	map04145	Phagosome	KEGG PATHWAY	35/1553	158/11318	0.00244266	0.0267008	Cellular Processes	Transport and catabolism	gene20665|gene3373|gene16684|gene4347|gene7346|gene14247|gene14433|gene8702|gene20401|gene8543|gene10772|gene18555|gene10561|gene20396|gene20397|gene2571|gene2573|gene20823|gene20398|gene12339|gene20840|gene16758|gene7598|gene15519|gene19081|gene2944|gene3818|gene13288|gene9111|gene15892|gene20407|gene20405|gene12606|gene20641|gene2370	LOC106029527;TCTN2;LOC106045884;LOC106032265;ITGA2;ATP6V1B1;LOC106043396;TUBB4B;LOC106049915;EEA1;MARCO;COMP;LOC106039090;LOC106049916;LOC106049912;LOC106030345;LOC106030347;LOC10603007823;LOC106049913;NCF1;LOC10603007840;MRC2;NCF4;THBS2;MUC1;ATP6V1C2;THBS1;LOC106042157;COLEC12;LOC106044971;LOC106049920;LOC106049922;RILP;LOC106029502;ITGB2
11	map05143	African trypanosomiasis	KEGG PATHWAY	11/1553	34/11318	0.00433905	0.0443703	Human Diseases	Infectious disease: parasitic	gene20396|gene20397|gene20665|gene14433|gene10829|gene20398|gene5391|gene20401|gene16801|gene11205|gene12791	LOC106049916;LOC106049912;LOC106029527;LOC106043396;VCAM1;LOC106049913;POLN1;LOC106049915;PRKCB;LOC106039769;FASLG
28	map05162	Measles	KEGG PATHWAY	28/1553	123/11318	0.00422303	0.0446234	Human Diseases	Infectious disease: viral	gene3889|gene16782|gene2720|gene12557|gene4347|gene6988|gene16645|gene10253|gene10215|gene13649|gene9042|gene12791|gene11109|gene17686|gene18816|gene20823|gene11186|gene11185|gene19722|gene15282|gene7606|gene208|gene10304|gene19271|gene19270|gene2313|gene7825|gene11333	IRF7;LOC106045971;CCNE2;IKBKE;LOC106032265;CASP3;CCND3;NFKBIA;IL2RA;LOC1060407229;IL2RG;FASLG;HSPA8;TRAF3;LOC106048210;LOC10603007823;CD3E;CD3D;LOC10603419722;PIK3CD;BLNK06;LOC106030078;FOS;PIK3AP171;PIK3AP170;CD28;LOC106036132;STAT1
22	map04620	Toll-like receptor signaling pathway	KEGG PATHWAY	22/1553	94/11318	0.00747662	0.0740653	Organismal Systems	Immune system	gene12292|gene3700|gene12557|gene17853|gene2836|gene4347|gene3889|gene10253|gene13649|gene19789|gene12638|gene10561|gene17686|gene12290|gene20823|gene15282|gene19459|gene208|gene10304|gene5185|gene11888|gene11333	LOC106041040;TLR5;IKBKE;CD40;LY96;LOC106032265;IRF7;NFKBIA;LOC1060407229;LOC10603419789;LOC106041491;LOC106039090;TRAF3;LOC106041041;LOC10603007823;PIK3CD;IRF5;LOC106030078;FOS;LOC106033294;TIRAP;STAT1
38	map05202	Transcriptional misregulation in cancer	KEGG PATHWAY	38/1553	188/11318	0.0083445	0.0801577	Human Diseases	Cancer: overview	gene20665|gene13574|gene16782|gene13751|gene15751|gene20089|gene17853|gene17850|gene19271|gene15178|gene5032|gene9948|gene14384|gene15635|gene19016|gene9699|gene465|gene19408|gene12933|gene20396|gene20397|gene14433|gene12357|gene2120|gene14438|gene20398|gene2855|gene20401|gene7519|gene7606|gene13281|gene13916|gene19270|gene9058|gene1571|gene6007|gene1439|gene1578	LOC106029527;CCNA2;LOC106045971;ZEB1;BCL6;DDIT3;CD40;MMP9;PIK3AP171;PML;CDKN2C;MYC;BCL2A1;MEIS1;CHRM36;SUPT3H;PLAU;PAX5;HPGD;LOC106049916;LOC106049912;LOC106043396;FLT3;LOC106029911;RUNX1;LOC106049913;EYA1;LOC106049915;IGF1;BLNK06;TSPAN7;LOC106042836;PIK3AP170;ETV1;LOC106045128;LOC106034136;SPI1;LOC106045890
14	map04612	Antigen processing and presentation	KEGG PATHWAY	14/1553	52/11318	0.00867945	0.0809231	Organismal Systems	Immune system	gene16782|gene496|gene12437|gene20405|gene19271|gene19270|gene20840|gene15892|gene20407|gene497|gene17700|gene18476|gene20641|gene11109	LOC106045971;LOC106033965;CIITA;LOC106049922;PIK3AP171;PIK3AP170;LOC10603007840;LOC106044971;LOC106049920;CD8A;HSP90AA1;NFKB276;LOC106029502;HSPA8
44	map05205	Proteoglycans in cancer	KEGG PATHWAY	44/1553	229/11318	0.0119678	0.108394	Human Diseases	Cancer: overview	gene19671|gene10123|gene3401|gene14183|gene17850|gene16171|gene13515|gene6988|gene4347|gene8539|gene7321|gene7346|gene350|gene18485|gene15359|gene13840|gene9948|gene465|gene10796|gene13027|gene2265|gene15282|gene18344|gene20823|gene13562|gene12791|gene19959|gene12509|gene11855|gene15263|gene7519|gene1497|gene3818|gene15343|gene8538|gene47|gene18748|gene3569|gene2357|gene15892|gene11073|gene16801|…	WNT4;ANK2;FZD10;MMP2;MMP9;FZD8;WNT11;CASP3;LOC106032265;DCN;HGF;ITGA2;ANK3;LOC106047829;FGFR1;HBEGF;MYC;PLAU;WNT10A;HPSE;HOXD10;PIK3CD;LOC106047723;LOC10603007823;FGF2;FASLG;LOC106049445;WNT2B;WNT5A;LOC106044308;IGF1;LOC106044451;THBS1;ANK1;LUM;HPSE2;LOC106048163;PXN;FZD7;LOC106044971;FZD1;PRKCB;FN1;NFKB265
36	map05203	Viral carcinogenesis	KEGG PATHWAY	36/1553	181/11318	0.012886	0.110402	Human Diseases	Cancer: overview	gene11987|gene13574|gene2464|gene2720|gene3669|gene1583|gene3889|gene18816|gene16645|gene8056|gene10253|gene8744|gene12998|gene1566|gene6291|gene700|gene9061|gene17686|gene6988|gene5678|gene15282|gene9868|gene9869|gene8025|gene16004|gene349|gene184|gene2495|gene11883|gene3569|gene1570|gene1571|gene9870|gene1578|gene10479|gene5872	GSN;CCNA2;CREB5;CCNE2;TRAF5;LOC1060481533;IRF7;LOC106048210;CCND3;PMAIP1;NFKBIA;TRAF2;CCR4;LOC106045814;HDAC4;RBPJ;SCIN;TRAF3;CASP3;GTF2A2;PIK3CD;LOC106038377;LOC106038356;LOC106036387;SYK;CDK1;NFKB2;KAT2B;CHEK1;PXN;LOC106045851;LOC106045128;LOC106038357;LOC106045890;LYN;CDC20
23	map04380	Osteoclast differentiation	KEGG PATHWAY	23/1553	104/11318	0.0127085	0.111906	Organismal Systems	Development and regeneration	gene11094|gene6211|gene6887|gene10253|gene8744|gene76|gene9821|gene19789|gene12442|gene2120|gene8965|gene15282|gene12339|gene7598|gene16004|gene184|gene208|gene10304|gene4840|gene9293|gene1439|gene9468|gene11333	CALCR;LCP2;TNFSF11;NFKBIA;TRAF2;BLNK;NFATC1;LOC10603419789;SOCS1;LOC106029911;NOX1;PIK3CD;NCF1;NCF4;SYK;NFKB2;LOC106030078;FOS;SQSTM1;GPR1613;SPI1;LCK;STAT1
61	map04151	PI3K-Akt signaling pathway	KEGG PATHWAY	61/1553	339/11318	0.0147267	0.122852	Environmental Information Processing	Signal transduction	gene15854|gene20665|gene8973|gene14670|gene20397|gene13078|gene2464|gene2720|gene10062|gene15544|gene8030|gene9326|gene9309|gene4347|gene7606|gene6607|gene192|gene16645|gene7321|gene7346|gene5563|gene14433|gene10215|gene15359|gene9948|gene6002|gene6331|gene17700|gene15124|gene9042|gene7975|gene15282|gene18555|gene20396|gene18816|gene6553|gene17377|gene20823|gene13562|gene12791|gene12357|gene7292|…	INSR;LOC106029527;FGF13;ITGA11;LOC106049912;AREG;CREB5;CCNE2;COL4A6;LOC106044634;IL7R;FIGF;MTCP1;LOC106032265;BLNK06;ITGB4;PIK3AP1;CCND3;HGF;ITGA2;FGF7;LOC106043396;IL2RA;FGFR1;MYC;EVC2;COL6A3;HSP90AA1;LAMB2;IL2RG;FGF10;PIK3CD;COMP;LOC106049916;LOC106048210;CHAD;COL6A6;LOC10603007823;FGF2;FASLG;FLT3;RELN;LOC106049913;GNG5;ITGA9;MYB;MAGI2;THBS2;SYK;LAMA2;MUC1;IGF1;LPAR4;THBS1;PDGFRB;LPAR1;LOC10603…
38	map05170	Human immunodeficiency virus 1 infection	KEGG PATHWAY	38/1553	196/11318	0.0161576	0.124926	Human Diseases	Infectious disease: viral	gene19270|gene11543|gene5647|gene16782|gene3669|gene4347|gene6988|gene19271|gene7610|gene20029|gene10253|gene8744|gene9821|gene18476|gene10735|gene12791|gene20823|gene11186|gene11185|gene5926|gene9869|gene15282|gene1052|gene17756|gene349|gene10183|gene208|gene10304|gene11883|gene20037|gene2596|gene14137|gene7955|gene3569|gene12165|gene16801|gene9870|gene20641	PIK3AP170;TNFRSF1B;CCNB2;LOC106045971;TRAF5;LOC106032265;CASP3;PIK3AP171;BLNK10;PTK2B;NFKBIA;TRAF2;NFATC1;NFKB276;CXCR4;FASLG;LOC10603007823;CD3E;CD3D;GNG5;LOC106038356;PIK3CD;CD247;PAK6;CDK1;LOC106038708;LOC106030078;FOS;CHEK1;CCNB3;MB21D1;GNAO1;AP1S3;PXN;WEE1;PRKCB;LOC106038357;LOC106029502
4	map00981	Insect hormone biosynthesis	KEGG PATHWAY	4/1553	8/11318	0.0156093	0.126876	Metabolism	Metabolism of terpenoids and polyketides	gene20768|gene16586|gene16587|gene3295	LOC106029637;LOC106045763;LOC106045817;ALDH2
11	map04940	Type I diabetes mellitus	KEGG PATHWAY	11/1553	40/11318	0.0161496	0.127986	Human Diseases	Endocrine and metabolic disease	gene4424|gene11359|gene19270|gene16782|gene19271|gene18710|gene20840|gene20407|gene20405|gene2313|gene12791	CPE;HSPD1;PIK3AP170;LOC106045971;PIK3AP171;GAD2;LOC10603007840;LOC106049920;LOC106049922;CD28;FASLG
20	map04657	IL-17 signaling pathway	KEGG PATHWAY	20/1553	90/11318	0.01831	0.138197	Organismal Systems	Immune system	gene19639|gene17686|gene6988|gene6009|gene10253|gene208|gene12638|gene10304|gene19290|gene15129|gene12557|gene8744|gene3669|gene19925|gene6007|gene17700|gene9668|gene4606|gene17850|gene19640	LOC106049125;TRAF3;CASP3;EVC9;NFKBIA;LOC106030078;LOC106041491;FOS;PIK3AP190;LOC106044089;IKBKE;TRAF2;TRAF5;TRAF4;LOC106034136;HSP90AA1;LOC106038139;TRAF3IP2;MMP9;LOC106049127
16	map04115	p53 signaling pathway	KEGG PATHWAY	16/1553	68/11318	0.0196454	0.144828	Cellular Processes	Cell growth and death	gene6988|gene16645|gene349|gene5647|gene8056|gene7519|gene20037|gene4566|gene2720|gene13175|gene2935|gene3891|gene11327|gene11883|gene6036|gene3818	CASP3;CCND3;CDK1;CCNB2;PMAIP1;IGF1;CCNB3;LOC106032402;CCNE2;GTSE1;RRM2;PIDD1;SERPINB5;CHEK1;SESN3;THBS1
21	map05222	Small cell lung cancer	KEGG PATHWAY	21/1553	97/11318	0.0210487	0.151646	Human Diseases	Cancer: specific types	gene17686|gene15124|gene8025|gene15997|gene8744|gene10253|gene208|gene15282|gene7346|gene2720|gene10062|gene9134|gene16021|gene19925|gene6988|gene3669|gene6346|gene2519|gene9948|gene4508|gene18392	TRAF3;LAMB2;LOC106036387;CKS2;TRAF2;NFKBIA;LOC106030078;PIK3CD;ITGA2;CCNE2;COL4A6;F54;LOC106045119;TRAF4;CASP3;TRAF5;FN1;RARB;MYC;LAMA2;PSD92
7	map00531	Glycosaminoglycan degradation	KEGG PATHWAY	7/1553	22/11318	0.02361	0.162704	Metabolism	Glycan biosynthesis and metabolism	gene47|gene12624|gene13912|gene6928|gene9245|gene13027|gene1752	HPSE2;GUSB;LOC106042799;HGSNAT;IDS;HPSE;GNS
21	map04512	ECM-receptor interaction	KEGG PATHWAY	21/1553	98/11318	0.0234391	0.165116	Environmental Information Processing	Signaling molecules and interaction	gene6607|gene15124|gene6553|gene1497|gene17377|gene3818|gene7346|gene10062|gene7292|gene9134|gene15414|gene4508|gene6331|gene6346|gene15519|gene16356|gene19081|gene14670|gene6237|gene18555|gene19308	ITGB4;LAMB2;CHAD;LOC106044451;COL6A6;THBS1;ITGA2;COL4A6;RELN;F54;LOC106044440;LAMA2;COL6A3;FN1;THBS2;ITGA9;MUC1;ITGA11;HMMR;COMP;DAG1
19	map04610	Complement and coagulation cascades	KEGG PATHWAY	19/1553	88/11318	0.0279893	0.188779	Organismal Systems	Immune system	gene18695|gene11570|gene11984|gene20338|gene18698|gene745|gene6683|gene465|gene20760|gene8002|gene19513|gene913|gene17170|gene10862|gene19609|gene3476|gene12732|gene12730|gene2370	LOC106048078;MASP2;C5;LOC106049849;LOC106048077;BDKRB1;F13A1;PLAU;LOC106029629;C7;LOC106048983;F5;F10;F3;LOC106049106;SERPIND1;CFH;LOC106041557;ITGB2
16	map04664	Fc epsilon RI signaling pathway	KEGG PATHWAY	16/1553	71/11318	0.0288493	0.190525	Organismal Systems	Immune system	gene20396|gene20397|gene20665|gene1364|gene6211|gene11669|gene15282|gene14433|gene19959|gene20398|gene1361|gene9293|gene7610|gene20401|gene16004|gene10479	LOC106049916;LOC106049912;LOC106029527;LOC106040722;LCP2;INPP5D;PIK3CD;LOC106043396;LOC106049445;LOC106049913;LOC106043002;GPR1613;BLNK10;LOC106049915;SYK;LYN
15	map05217	Basal cell carcinoma	KEGG PATHWAY	15/1553	66/11318	0.031368	0.202932	Human Diseases	Cancer: specific types	gene4772|gene19671|gene10159|gene3401|gene18485|gene4032|gene16477|gene12509|gene2087|gene11073|gene10796|gene2357|gene11855|gene16171|gene13515	HPSE272;WNT4;LEF1;FZD10;LOC106047829;TCF7L2;LOC106045698;WNT2B;LOC1060300787;FZD1;WNT10A;FZD7;WNT5A;FZD8;WNT11
22	map05145	Toxoplasmosis	KEGG PATHWAY	22/1553	107/11318	0.0320287	0.203062	Human Diseases	Infectious disease: parasitic	gene11193|gene12437|gene17853|gene2836|gene4347|gene6988|gene10253|gene8984|gene12442|gene11109|gene20823|gene9869|gene20840|gene4508|gene15124|gene208|gene14137|gene9134|gene20407|gene20405|gene9870|gene11333	IL10RA;CIITA;CD40;LY96;LOC106032265;CASP3;NFKBIA;CD40LG;SOCS1;HSPA8;LOC10603007823;LOC106038356;LOC10603007840;LAMA2;LAMB2;LOC106030078;GNAO1;F54;LOC106049920;LOC106049922;LOC106038357;STAT1
56	map05165	Human papillomavirus infection	KEGG PATHWAY	56/1553	321/11318	0.03268	0.203129	Human Diseases	Infectious disease: viral	gene19671|gene3401|gene13574|gene8006|gene2464|gene2720|gene10062|gene12557|gene3373|gene14670|gene2815|gene16171|gene13515|gene6607|gene9134|gene4772|gene7614|gene14247|gene4032|gene18485|gene16645|gene15519|gene6331|gene10796|gene6031|gene18392|gene700|gene18555|gene17686|gene6553|gene12773|gene17377|gene4749|gene12791|gene7292|gene12509|gene16356|gene6562|gene11855|gene4508|gene19081|gene15282…	WNT4;FZD10;CCNA2;PTGER4;CREB5;CCNE2;COL4A6;IKBKE;TCTN2;ITGA11;HEY1;FZD8;WNT11;ITGB4;F54;HPSE272;BLNK14;ATP6V1B1;TCF7L2;LOC106047829;CCND3;THBS2;COL6A3;WNT10A;MAML2;PSD92;RBPJ;COMP;TRAF3;CHAD;NOTCH2;COL6A6;IRF1;FASLG;RELN;WNT2B;ITGA9;LOC106034617;WNT5A;LAMA2;MUC1;PIK3CD;LAMB2;CASP3;ATP6V1C2;THBS1;PDGFRB;LOC106030078;ITGA2;PARD3;PXN;FZD7;FZD1;FN1;LOC106036132;STAT1
19	map05412	Arrhythmogenic right ventricular cardiomyopathy (ARVC)	KEGG PATHWAY	19/1553	90/11318	0.0346098	0.210987	Human Diseases	Cardiovascular disease	gene6607|gene3016|gene3172|gene19308|gene10159|gene7346|gene7322|gene13298|gene4032|gene6673|gene16949|gene16356|gene4772|gene14670|gene9162|gene9164|gene1887|gene4508|gene11690	ITGB4;SGCB;PKP2;DAG1;LEF1;ITGA2;CACNA2D1;LOC106042166;TCF7L2;DSP;CACNA1S;ITGA9;HPSE272;ITGA11;LOC106037565;DSG2;ACTN2;LAMA2;SGCG
8	map05332	Graft-versus-host disease	KEGG PATHWAY	8/1553	29/11318	0.0370314	0.22149	Human Diseases	Immune disease	gene16782|gene19271|gene19270|gene20840|gene20407|gene20405|gene2313|gene12791	LOC106045971;PIK3AP171;PIK3AP170;LOC10603007840;LOC106049920;LOC106049922;CD28;FASLG
41	map05130	Pathogenic Escherichia coli infection	KEGG PATHWAY	41/1553	231/11318	0.0480424	0.282027	Human Diseases	Infectious disease: bacterial	gene19675|gene20665|gene2468|gene3700|gene17812|gene12024|gene16684|gene5505|gene6988|gene17620|gene17768|gene10253|gene8744|gene18970|gene17879|gene2585|gene8702|gene20652|gene20396|gene20397|gene14433|gene12791|gene20398|gene5491|gene6138|gene6562|gene17870|gene14052|gene15263|gene18748|gene14118|gene208|gene10304|gene4907|gene20401|gene11888|gene18486|gene10022|gene10479|gene18465|gene4107	CLDN19;LOC106029527;WIPF3;TLR5;HCK;LOC106040731;LOC106045884;BAIAP2L1;CASP3;MYO1D;LOC106047050;NFKBIA;TRAF2;MYO1F;LOC106047203;MYO6;TUBB4B;LOC106029514;LOC106049916;LOC106049912;LOC106043396;FASLG;LOC106049913;CYTH3;CLDN20;LOC106034617;LOC106047195;LPAR4;LOC106044308;LOC106048163;LPAR1;LOC106030078;FOS;CYFIP2;LOC106049915;TIRAP;LPAR5;LOC106038521;LYN;NFKB265;TNFSF10
28	map05224	Breast cancer	KEGG PATHWAY	28/1553	149/11318	0.0497781	0.286903	Human Diseases	Cancer: specific types	gene8973|gene3401|gene2815|gene19671|gene16171|gene13515|gene4772|gene6887|gene5563|gene4032|gene15359|gene9948|gene10796|gene18485|gene7975|gene12773|gene10159|gene13562|gene15282|gene12509|gene16021|gene11855|gene18392|gene7519|gene184|gene10304|gene2357|gene11073	FGF13;FZD10;HEY1;WNT4;FZD8;WNT11;HPSE272;TNFSF11;FGF7;TCF7L2;FGFR1;MYC;WNT10A;LOC106047829;FGF10;NOTCH2;LEF1;FGF2;PIK3CD;WNT2B;LOC106045119;WNT5A;PSD92;IGF1;NFKB2;FOS;FZD7;FZD1
20	map05215	Prostate cancer	KEGG PATHWAY	20/1553	101/11318	0.055725	0.315444	Human Diseases	Cancer: specific types	gene7519|gene4772|gene16393|gene4849|gene10159|gene10253|gene208|gene2720|gene15282|gene2464|gene4032|gene15359|gene13751|gene6002|gene465|gene6007|gene17700|gene16021|gene17850|gene18392	IGF1;HPSE272;AR;PDGFRB;LEF1;NFKBIA;LOC106030078;CCNE2;PIK3CD;CREB5;TCF7L2;FGFR1;ZEB1;EVC2;PLAU;LOC106034136;HSP90AA1;LOC106045119;MMP9;PSD92
30	map05206	MicroRNAs in cancer	KEGG PATHWAY	30/1553	164/11318	0.0588883	0.3164	Human Diseases	Cancer: overview	gene17512|gene14361|gene2720|gene10060|gene13751|gene15402|gene1971|gene17850|gene9552|gene9948|gene465|gene12442|gene2265|gene6988|gene12773|gene15282|gene14662|gene16021|gene6291|gene18392|gene7090|gene1497|gene3818|gene4849|gene11327|gene13916|gene16946|gene16801|gene9832|gene15756	CDC25A;TRIM71;CCNE2;IRS4;ZEB1;IRS2;LOC1060341971;MMP9;STMN1;MYC;PLAU;SOCS1;HOXD10;CASP3;NOTCH2;PIK3CD;KIF23;LOC106045119;HDAC4;PSD92;ZFPM2;LOC106044451;THBS1;PDGFRB;SERPINB5;LOC106042836;LOC106046136;PRKCB;RECK;LOC1060458406
27	map04310	Wnt signaling pathway	KEGG PATHWAY	27/1553	145/11318	0.0586119	0.320344	Environmental Information Processing	Signal transduction	gene16220|gene19671|gene3401|gene4941|gene12301|gene16686|gene16171|gene13515|gene16645|gene7610|gene15312|gene4032|gene9948|gene9532|gene9821|gene10796|gene18485|gene10159|gene12509|gene1697|gene4772|gene11855|gene7233|gene15348|gene2357|gene11073|gene16801	DKK2;WNT4;FZD10;ROR1;RNF43;LGR6;FZD8;WNT11;CCND3;BLNK10;SFRP4;TCF7L2;MYC;RSPO1;NFATC1;WNT10A;LOC106047829;LEF1;WNT2B;LGR5;HPSE272;WNT5A;PRICKLE2;SFRP1;FZD7;FZD1;PRKCB
23	map04670	Leukocyte transendothelial migration	KEGG PATHWAY	23/1553	120/11318	0.0584171	0.324881	Organismal Systems	Immune system	gene19675|gene10829|gene14183|gene12556|gene17850|gene7610|gene7499|gene20029|gene7500|gene6138|gene10735|gene3005|gene15282|gene19959|gene12339|gene7598|gene15263|gene13288|gene3569|gene16801|gene3870|gene4906|gene2370	CLDN19;VCAM1;MMP2;RASSF5;MMP9;BLNK10;CD99;PTK2B;XG;CLDN20;CXCR4;TXK;PIK3CD;LOC106049445;NCF1;NCF4;LOC106044308;LOC106042157;PXN;PRKCB;ARHGAP5;ITK;ITGB2
26	map04550	Signaling pathways regulating pluripotency of stem cells	KEGG PATHWAY	26/1553	140/11318	0.0642306	0.339352	Cellular Processes	Cellular community - eukaryotes	gene17344|gene19671|gene3401|gene15635|gene3603|gene16171|gene13515|gene18816|gene8503|gene4772|gene15359|gene9948|gene10796|gene13967|gene18485|gene13562|gene15282|gene12509|gene11855|gene9091|gene7519|gene8753|gene2357|gene11073|gene12896|gene12897	ZFHX3;WNT4;FZD10;MEIS1;TBX3;FZD8;WNT11;LOC106048210;ACVR2B;HPSE272;FGFR1;MYC;WNT10A;INHBA;LOC106047829;FGF2;PIK3CD;WNT2B;WNT5A;DLX5;IGF1;LOC106037140;FZD7;FZD1;JARID2;LOC106041693
10	map00380	Tryptophan metabolism	KEGG PATHWAY	10/1553	44/11318	0.0708382	0.35644	Metabolism	Amino acid metabolism	gene15194|gene10747|gene3637|gene16586|gene16587|gene3295|gene20768|gene1504|gene1971|gene10595	LOC106044188;ACMSD;HAAO;LOC106045763;LOC106045817;ALDH2;LOC106029637;CAT;LOC1060341971;EHHADH
26	map04630	Jak-STAT signaling pathway	KEGG PATHWAY	26/1553	141/11318	0.0689059	0.358085	Environmental Information Processing	Signal transduction	gene11193|gene7487|gene8030|gene18816|gene5402|gene13920|gene10215|gene16832|gene9948|gene16831|gene9415|gene9414|gene12442|gene9042|gene16946|gene16645|gene15282|gene4849|gene15263|gene7606|gene8990|gene14612|gene19161|gene11335|gene18465|gene11333	IL10RA;LOC106035752;IL7R;LOC106048210;HAUS32;CISH;IL2RA;LOC106046046;MYC;IL21R;IL22RA1;IFNLR1;SOCS1;IL2RG;LOC106046136;CCND3;PIK3CD;PDGFRB;LOC106044308;BLNK06;FHL1;IL12RB2;IL11RA;STAT4;NFKB265;STAT1
16	map04914	Progesterone-mediated oocyte maturation	KEGG PATHWAY	16/1553	80/11318	0.0750904	0.360662	Organismal Systems	Endocrine system	gene13398|gene7519|gene17512|gene1261|gene10098|gene10970|gene13574|gene18515|gene20037|gene16810|gene10599|gene17700|gene349|gene12192|gene15282|gene5647	BUB1;IGF1;CDC25A;AURKA;MAD2L1;ADCY7;CCNA2;RPS6KA1;CCNB3;PLK1;ANAPC13;HSP90AA1;CDK1;PDE3B;PIK3CD;CCNB2
21	map05414	Dilated cardiomyopathy (DCM)	KEGG PATHWAY	21/1553	110/11318	0.0705913	0.360926	Human Diseases	Cardiovascular disease	gene6607|gene20396|gene20665|gene19308|gene20397|gene7519|gene10970|gene3842|gene7346|gene7322|gene20398|gene16949|gene2286|gene20401|gene14670|gene3016|gene16356|gene13298|gene14433|gene4508|gene11690	ITGB4;LOC106049916;LOC106029527;DAG1;LOC106049912;IGF1;ADCY7;ACTC1;ITGA2;CACNA2D1;LOC106049913;CACNA1S;TTN;LOC106049915;ITGA11;SGCB;ITGA9;LOC106042166;LOC106043396;LAMA2;SGCG
38	map04015	Rap1 signaling pathway	KEGG PATHWAY	38/1553	219/11318	0.0729822	0.36149	Environmental Information Processing	Signal transduction	gene15854|gene8973|gene16782|gene5700|gene9326|gene8011|gene6211|gene7610|gene7321|gene1164|gene5563|gene15094|gene15359|gene7975|gene16183|gene8728|gene13562|gene15282|gene19959|gene10970|gene7312|gene18922|gene12556|gene7519|gene14052|gene3818|gene4849|gene10183|gene14118|gene14137|gene19271|gene19270|gene6002|gene16801|gene18486|gene13873|gene17323|gene2370	INSR;FGF13;LOC106045971;TLN2;FIGF;FYB;LCP2;BLNK10;HGF;LOC106041081;FGF7;RALGDS;FGFR1;FGF10;PARD3;GRIN1;FGF2;PIK3CD;LOC106049445;ADCY7;MAGI2;SKAP1;RASSF5;IGF1;LPAR4;THBS1;PDGFRB;LOC106038708;LPAR1;GNAO1;PIK3AP171;PIK3AP170;EVC2;PRKCB;LPAR5;ERCC673;LOC106046592;ITGB2
22	map04915	Estrogen signaling pathway	KEGG PATHWAY	22/1553	117/11318	0.0748768	0.365168	Organismal Systems	Endocrine system	gene14183|gene17850|gene16933|gene13840|gene18595|gene18594|gene18591|gene20067|gene20069|gene18599|gene2464|gene20066|gene15282|gene17700|gene10970|gene5530|gene10183|gene10304|gene18743|gene14137|gene11109|gene18600	MMP2;MMP9;FKBP5;HBEGF;LOC106048012;LOC106048010;LOC106047977;KRT23;LOC106049573;LOC106048011;CREB5;LOC106049570;PIK3CD;HSP90AA1;ADCY7;GPER1;LOC106038708;FOS;FKBP4;GNAO1;HSPA8;LOC106047979
28	map04072	Phospholipase D signaling pathway	KEGG PATHWAY	28/1553	158/11318	0.0907632	0.429432	Environmental Information Processing	Signal transduction	gene15854|gene20665|gene15544|gene20029|gene20398|gene15094|gene6002|gene7870|gene20396|gene20397|gene12296|gene14433|gene15282|gene12795|gene4974|gene10970|gene17969|gene5491|gene16004|gene1364|gene1361|gene14052|gene15263|gene4849|gene14118|gene20401|gene18486|gene1417	INSR;LOC106029527;LOC106044634;PTK2B;LOC106049913;RALGDS;EVC2;AGTR1;LOC106049916;LOC106049912;LOC106041043;LOC106043396;PIK3CD;DNM3;PPAP2B;ADCY7;DNM1;CYTH3;SYK;LOC106040722;LOC106043002;LPAR4;LOC106044308;PDGFRB;LPAR1;LOC106049915;LPAR5;DGKZ
36	map05132	Salmonella infection	KEGG PATHWAY	36/1553	212/11318	0.10055	0.461945	Human Diseases	Infectious disease: bacterial	gene4032|gene3700|gene17870|gene4107|gene2836|gene4347|gene6988|gene4772|gene17768|gene10253|gene8744|gene20823|gene17879|gene2585|gene9948|gene17700|gene19119|gene12821|gene10561|gene10159|gene3557|gene3558|gene3559|gene5491|gene20652|gene14154|gene12024|gene208|gene10304|gene15226|gene4907|gene13131|gene11888|gene10022|gene12606|gene6149	TCF7L2;TLR5;LOC106047195;TNFSF10;LY96;LOC106032265;CASP3;HPSE272;LOC106047050;NFKBIA;TRAF2;LOC10603007823;LOC106047203;MYO6;MYC;HSP90AA1;RHOG;GCC2;LOC106039090;LEF1;LOC106031353;LOC106031351;LOC106031352;CYTH3;LOC106029514;LOC106043112;LOC106040731;LOC106030078;FOS;DYNLT1;CYFIP2;PTPRC;TIRAP;LOC106038521;RILP;SNX9
19	map04668	TNF signaling pathway	KEGG PATHWAY	19/1553	102/11318	0.0997191	0.464867	Environmental Information Processing	Signal transduction	gene17686|gene4749|gene15282|gene6988|gene11543|gene6007|gene10253|gene208|gene12292|gene10304|gene2464|gene11989|gene8744|gene9326|gene5185|gene12853|gene3669|gene17850|gene10829	TRAF3;IRF1;PIK3CD;CASP3;TNFRSF1B;LOC106034136;NFKBIA;LOC106030078;LOC106041040;FOS;CREB5;DAB2IP;TRAF2;FIGF;LOC106033294;IL18R1;TRAF5;MMP9;VCAM1
10	map00514	Other types of O-glycan biosynthesis	KEGG PATHWAY	10/1553	48/11318	0.113565	0.507043	Metabolism	Glycan biosynthesis and metabolism	gene4888|gene2478|gene12319|gene7614|gene5969|gene19260|gene19356|gene2177|gene3782|gene863	GALNT10;GALNT15;WBSCR17;BLNK14;WFS19;PIK3AP160;GALNT2;GALNT3;GALNT16;B4GALT3
19	map04114	Oocyte meiosis	KEGG PATHWAY	19/1553	104/11318	0.115287	0.507585	Cellular Processes	Cell growth and death	gene13398|gene7519|gene349|gene19431|gene10098|gene10183|gene16810|gene2720|gene18515|gene20037|gene16393|gene10970|gene19433|gene2496|gene10599|gene1261|gene5647|gene6255|gene5872	BUB1;IGF1;CDK1;LOC106048914;MAD2L1;LOC106038708;PLK1;CCNE2;RPS6KA1;CCNB3;AR;ADCY7;LOC106048913;SGOL1;ANAPC13;AURKA;CCNB2;PTTG1;CDC20
9	map00071	Fatty acid degradation	KEGG PATHWAY	9/1553	42/11318	0.112869	0.511135	Metabolism	Lipid metabolism	gene8482|gene20701|gene20702|gene16586|gene16587|gene3295|gene4029|gene20768|gene10595	PLA1A2;LOC106029566;LOC106029567;LOC106045763;LOC106045817;ALDH2;ACSL5;LOC106029637;EHHADH
26	map05226	Gastric cancer	KEGG PATHWAY	26/1553	150/11318	0.121718	0.528556	Human Diseases	Cancer: specific types	gene8973|gene3401|gene2720|gene19671|gene16171|gene13515|gene4772|gene7321|gene5563|gene4032|gene9948|gene10796|gene18485|gene7975|gene15282|gene10159|gene13562|gene2120|gene12509|gene16021|gene2519|gene11855|gene18392|gene2357|gene11073|gene17323	FGF13;FZD10;CCNE2;WNT4;FZD8;WNT11;HPSE272;HGF;FGF7;TCF7L2;MYC;WNT10A;LOC106047829;FGF10;PIK3CD;LEF1;FGF2;LOC106029911;WNT2B;LOC106045119;RARB;WNT5A;PSD92;FZD7;FZD1;LOC106046592
20	map05146	Amoebiasis	KEGG PATHWAY	20/1553	114/11318	0.146025	0.564512	Human Diseases	Infectious disease: parasitic	gene20396|gene20397|gene16306|gene20665|gene20593|gene20823|gene3800|gene14433|gene6988|gene10062|gene20398|gene9134|gene20401|gene16801|gene6346|gene15124|gene4347|gene15282|gene4508|gene2370	LOC106049916;LOC106049912;LOC106045455;LOC106029527;LOC106029451;LOC10603007823;ARG2;LOC106043396;CASP3;COL4A6;LOC106049913;F54;LOC106049915;PRKCB;FN1;LAMB2;LOC106032265;PIK3CD;LAMA2;ITGB2
18	map04916	Melanogenesis	KEGG PATHWAY	18/1553	101/11318	0.145506	0.56945	Organismal Systems	Endocrine system	gene18170|gene4772|gene19671|gene10159|gene10183|gene3401|gene4032|gene14137|gene12509|gene10970|gene2357|gene11073|gene16801|gene10796|gene18485|gene11855|gene16171|gene13515	LOC106047519;HPSE272;WNT4;LEF1;LOC106038708;FZD10;TCF7L2;GNAO1;WNT2B;ADCY7;FZD7;FZD1;PRKCB;WNT10A;LOC106047829;WNT5A;FZD8;WNT11
13	map05221	Acute myeloid leukemia	KEGG PATHWAY	13/1553	69/11318	0.144131	0.571119	Human Diseases	Cancer: specific types	gene208|gene15178|gene4772|gene14438|gene10159|gene13574|gene12357|gene15282|gene4032|gene14384|gene9948|gene16946|gene1439	LOC106030078;PML;HPSE272;RUNX1;LEF1;CCNA2;FLT3;PIK3CD;TCF7L2;BCL2A1;MYC;LOC106046136;SPI1
28	map05152	Tuberculosis	KEGG PATHWAY	28/1553	166/11318	0.142187	0.577862	Human Diseases	Infectious disease: bacterial	gene20396|gene20665|gene16487|gene12437|gene3373|gene11359|gene4347|gene6988|gene14433|gene8543|gene10561|gene11193|gene20397|gene2571|gene2573|gene20823|gene20398|gene20840|gene16758|gene16004|gene14154|gene10183|gene20401|gene20407|gene11888|gene20405|gene11333|gene2370	LOC106049916;LOC106029527;LOC106045683;CIITA;TCTN2;HSPD1;LOC106032265;CASP3;LOC106043396;EEA1;LOC106039090;IL10RA;LOC106049912;LOC106030345;LOC106030347;LOC10603007823;LOC106049913;LOC10603007840;MRC2;SYK;LOC106043112;LOC106038708;LOC106049915;LOC106049920;TIRAP;LOC106049922;STAT1;ITGB2
28	map04390	Hippo signaling pathway	KEGG PATHWAY	28/1553	166/11318	0.142187	0.577862	Environmental Information Processing	Signal transduction	gene7046|gene3401|gene15055|gene13078|gene16388|gene19671|gene16171|gene13515|gene16645|gene4772|gene4032|gene9948|gene2087|gene10796|gene18485|gene16183|gene19819|gene10159|gene2120|gene12509|gene2646|gene11855|gene16477|gene2357|gene11073|gene12140|gene17323|gene2370	STK3;FZD10;FRMD6;AREG;LOC106045529;WNT4;FZD8;WNT11;CCND3;HPSE272;TCF7L2;MYC;LOC1060300787;WNT10A;LOC106047829;PARD3;SAV1;LEF1;LOC106029911;WNT2B;BMP5;WNT5A;LOC106045698;FZD7;FZD1;TEAD1;LOC106046592;ITGB2
9	map05219	Bladder cancer	KEGG PATHWAY	9/1553	44/11318	0.140593	0.578806	Human Diseases	Cancer: specific types	gene3818|gene9948|gene14183|gene13840|gene6009|gene16021|gene17850|gene17323|gene18392	THBS1;MYC;MMP2;HBEGF;EVC9;LOC106045119;MMP9;LOC106046592;PSD92
7	map05216	Thyroid cancer	KEGG PATHWAY	7/1553	33/11318	0.157584	0.580862	Human Diseases	Cancer: specific types	gene4772|gene10159|gene353|gene4032|gene421|gene9948|gene17323	HPSE272;LEF1;CCDC6;TCF7L2;RET;MYC;LOC106046592
25	map04150	mTOR signaling pathway	KEGG PATHWAY	25/1553	148/11318	0.156512	0.583697	Environmental Information Processing	Signal transduction	gene15854|gene11315|gene19671|gene6843|gene3401|gene16171|gene13515|gene14247|gene10796|gene18485|gene15282|gene18515|gene12509|gene8025|gene11855|gene7519|gene9778|gene2944|gene208|gene11395|gene8200|gene2357|gene11073|gene12086|gene16801	INSR;RNF152;WNT4;CAB39L;FZD10;FZD8;WNT11;ATP6V1B1;WNT10A;LOC106047829;PIK3CD;RPS6KA1;WNT2B;LOC106036387;WNT5A;IGF1;PRR5;ATP6V1C2;LOC106030078;LOC106040019;GRB10;FZD7;FZD1;LOC106040774;PRKCB
13	map05218	Melanoma	KEGG PATHWAY	13/1553	70/11318	0.156092	0.589061	Human Diseases	Cancer: specific types	gene7519|gene8973|gene4849|gene7321|gene5563|gene13562|gene15282|gene15359|gene6002|gene16021|gene7975|gene17323|gene18392	IGF1;FGF13;PDGFRB;HGF;FGF7;FGF2;PIK3CD;FGFR1;EVC2;LOC106045119;FGF10;LOC106046592;PSD92
18	map04933	AGE-RAGE signaling pathway in diabetic complications	KEGG PATHWAY	18/1553	102/11318	0.155318	0.593201	Human Diseases	Endocrine and metabolic disease	gene6988|gene8965|gene17626|gene10808|gene13288|gene2120|gene14183|gene10062|gene9326|gene16946|gene10862|gene16801|gene7870|gene6346|gene9821|gene11333|gene10829|gene15282	CASP3;NOX1;PLCD3;PLCD4;LOC106042157;LOC106029911;MMP2;COL4A6;FIGF;LOC106046136;F3;PRKCB;AGTR1;FN1;NFATC1;STAT1;VCAM1;PIK3CD
7	map04392	Hippo signaling pathway - multiple species	KEGG PATHWAY	7/1553	32/11318	0.139701	0.59845	Environmental Information Processing	Signal transduction	gene19819|gene15055|gene16388|gene18300|gene7046|gene13549|gene12140	SAV1;FRMD6;LOC106045529;RASSF2;STK3;FAT4;TEAD1
7	map03030	DNA replication	KEGG PATHWAY	7/1553	32/11318	0.139701	0.59845	Genetic Information Processing	Replication and repair	gene313|gene9605|gene10737|gene18126|gene9911|gene9675|gene7585	DNA2;MCM2;MCM6;POLE;MCM4;MCM3;MCM5
7	map01040	Biosynthesis of unsaturated fatty acids	KEGG PATHWAY	7/1553	32/11318	0.139701	0.59845	Metabolism	Lipid metabolism	gene8482|gene1468|gene7393|gene1541|gene19151|gene17906|gene1336	PLA1A2;HSD17B12;ELOVL7;LOC106044856;ELOVL4;ACOT7;LOC106042682
20	map05142	Chagas disease (American trypanosomiasis)	KEGG PATHWAY	20/1553	116/11318	0.164783	0.600415	Human Diseases	Infectious disease: parasitic	gene12292|gene1052|gene16306|gene19270|gene20823|gene208|gene11186|gene11185|gene10253|gene14137|gene19271|gene15282|gene5185|gene10304|gene16782|gene2120|gene4347|gene12638|gene12791|gene10561	LOC106041040;CD247;LOC106045455;PIK3AP170;LOC10603007823;LOC106030078;CD3E;CD3D;NFKBIA;GNAO1;PIK3AP171;PIK3CD;LOC106033294;FOS;LOC106045971;LOC106029911;LOC106032265;LOC106041491;FASLG;LOC106039090
7	map04960	Aldosterone-regulated sodium reabsorption	KEGG PATHWAY	7/1553	34/11318	0.176446	0.635607	Organismal Systems	Excretory system	gene15854|gene7519|gene15282|gene16816|gene5146|gene16801|gene4319	INSR;IGF1;PIK3CD;SCNN1B;HSD11B2;PRKCB;NR3C2
30	map04360	Axon guidance	KEGG PATHWAY	30/1553	187/11318	0.202842	0.676852	Organismal Systems	Development and regeneration	gene19394|gene15988|gene19671|gene15079|gene19492|gene284|gene1040|gene7326|gene7610|gene19208|gene13928|gene7329|gene16183|gene13103|gene15970|gene17421|gene10735|gene15801|gene4045|gene15383|gene7319|gene11855|gene3951|gene15282|gene5579|gene17756|gene15263|gene579|gene18485|gene6021	LRRC4;LOC106045044;WNT4;NTNG2;SEMA4A;UNC5B;EPHA6;SEMA3E;BLNK10;PIK3AP108;LOC106042805;SEMA3D;PARD3;NTNG1;LOC106045060;NTN1;CXCR4;LOC10604815301;ABLIM1;UNC5D;SEMA3C;WNT5A;LOC106031921;PIK3CD;SEMA6D;PAK6;LOC106044308;ABLIM2;LOC106047829;TRPC6
8	map00140	Steroid hormone biosynthesis	KEGG PATHWAY	8/1553	41/11318	0.192372	0.677575	Metabolism	Lipid metabolism	gene15194|gene1468|gene197|gene17258|gene10519|gene5146|gene15761|gene1971	LOC106044188;HSD17B12;LOC106034197;LOC106046522;LOC106039057;HSD11B2;HSD17B2;LOC1060341971
10	map04923	Regulation of lipolysis in adipocytes	KEGG PATHWAY	10/1553	54/11318	0.199083	0.678595	Organismal Systems	Endocrine system	gene9602|gene15854|gene8086|gene15282|gene10060|gene10970|gene15402|gene3893|gene15495|gene12192	MGLL;INSR;PLIN1;PIK3CD;IRS4;ADCY7;IRS2;PNPLA2;TSHR;PDE3B
10	map04913	Ovarian steroidogenesis	KEGG PATHWAY	10/1553	54/11318	0.199083	0.678595	Organismal Systems	Endocrine system	gene15194|gene15854|gene1361|gene1364|gene7519|gene10970|gene15761|gene1971|gene1336|gene14211	LOC106044188;INSR;LOC106043002;LOC106040722;IGF1;ADCY7;HSD17B2;LOC1060341971;LOC106042682;LHCGR
35	map04510	Focal adhesion	KEGG PATHWAY	35/1553	220/11318	0.194904	0.67895	Cellular Processes	Cellular community - eukaryotes	gene10062|gene5700|gene9326|gene14670|gene6607|gene3569|gene7610|gene7321|gene7346|gene6331|gene3696|gene10440|gene18555|gene16645|gene6553|gene17377|gene15124|gene15282|gene7292|gene19959|gene16356|gene15519|gene10996|gene4508|gene19081|gene7519|gene17756|gene19217|gene3818|gene4849|gene9134|gene6002|gene16801|gene6346|gene3870	COL4A6;TLN2;FIGF;ITGA11;ITGB4;PXN;BLNK10;HGF;ITGA2;COL6A3;CAPN2;DOCK1;COMP;CCND3;CHAD;COL6A6;LAMB2;PIK3CD;RELN;LOC106049445;ITGA9;THBS2;MYLK3;LAMA2;MUC1;IGF1;PAK6;RASGRF1;THBS1;PDGFRB;F54;EVC2;PRKCB;FN1;ARHGAP5
25	map04934	Cushing syndrome	KEGG PATHWAY	25/1553	152/11318	0.19153	0.682191	Human Diseases	Endocrine and metabolic disease	gene19671|gene3401|gene2464|gene2720|gene4109|gene16171|gene13515|gene4772|gene8472|gene4032|gene10796|gene18485|gene10159|gene7870|gene12509|gene10970|gene4257|gene16021|gene11855|gene18392|gene4233|gene2357|gene11073|gene5032|gene16949	WNT4;FZD10;CREB5;CCNE2;NCEH1;FZD8;WNT11;HPSE272;CRHR2;TCF7L2;WNT10A;LOC106047829;LEF1;AGTR1;WNT2B;ADCY7;CACNA1H;LOC106045119;WNT5A;PSD92;RASD1;FZD7;FZD1;CDKN2C;CACNA1S
32	map04020	Calcium signaling pathway	KEGG PATHWAY	32/1553	200/11318	0.198046	0.682398	Environmental Information Processing	Signal transduction	gene16349|gene16306|gene20665|gene10808|gene16782|gene1901|gene12669|gene17626|gene20029|gene3342|gene10996|gene18170|gene7870|gene8728|gene8354|gene20396|gene20397|gene14433|gene11403|gene10735|gene745|gene20398|gene10970|gene4257|gene14211|gene4849|gene10183|gene19271|gene19270|gene20401|gene16801|gene16949	PDE1C;LOC106045455;LOC106029527;PLCD4;LOC106045971;CHRM3;ORAI2;PLCD3;PTK2B;LOC106031149;MYLK3;LOC106047519;AGTR1;GRIN1;OXTR;LOC106049916;LOC106049912;LOC106043396;HRH1;CXCR4;BDKRB1;LOC106049913;ADCY7;CACNA1H;LHCGR;PDGFRB;LOC106038708;PIK3AP171;PIK3AP170;LOC106049915;PRKCB;CACNA1S
43	map04010	MAPK signaling pathway	KEGG PATHWAY	43/1553	278/11318	0.21861	0.707137	Environmental Information Processing	Signal transduction	gene15854|gene7046|gene18515|gene13078|gene3052|gene9326|gene13882|gene20089|gene8973|gene9552|gene7610|gene7322|gene7321|gene8744|gene4014|gene15359|gene9948|gene9821|gene16955|gene7975|gene2120|gene11109|gene6988|gene4080|gene13562|gene12791|gene12357|gene13689|gene4257|gene13729|gene1361|gene7519|gene19217|gene1364|gene4849|gene184|gene208|gene10304|gene16861|gene5563|gene6002|gene16801|gene16…	INSR;STK3;RPS6KA1;AREG;DUSP16;FIGF;ERCC682;DDIT3;FGF13;STMN1;BLNK10;CACNA2D1;HGF;TRAF2;DUSP5;FGFR1;MYC;NFATC1;LOC106046186;FGF10;LOC106029911;HSPA8;CASP3;MECOM;FGF2;FASLG;FLT3;PTPN5;CACNA1H;DUSP8;LOC106043002;IGF1;RASGRF1;LOC106040722;PDGFRB;NFKB2;LOC106030078;FOS;DUSP4;FGF7;EVC2;PRKCB;CACNA1S
34	map04810	Regulation of actin cytoskeleton	KEGG PATHWAY	34/1553	216/11318	0.217523	0.710873	Cellular Processes	Cell motility	gene11987|gene19498|gene8973|gene1901|gene12024|gene11683|gene14670|gene6607|gene7610|gene7346|gene5563|gene15359|gene20652|gene7975|gene10440|gene9061|gene13562|gene10735|gene745|gene19959|gene16356|gene10996|gene15282|gene17756|gene14052|gene4849|gene14118|gene12965|gene3569|gene6002|gene18486|gene6346|gene4907|gene2370	GSN;LOC106048962;FGF13;CHRM3;LOC106040731;SPATA13;ITGA11;ITGB4;BLNK10;ITGA2;FGF7;FGFR1;LOC106029514;FGF10;DOCK1;SCIN;FGF2;CXCR4;BDKRB1;LOC106049445;ITGA9;MYLK3;PIK3CD;PAK6;LPAR4;PDGFRB;LPAR1;DIAPH3;PXN;EVC2;LPAR5;FN1;CYFIP2;ITGB2
26	map05161	Hepatitis B	KEGG PATHWAY	26/1553	162/11318	0.222361	0.712003	Human Diseases	Infectious disease: viral	gene13574|gene2464|gene2720|gene12557|gene17850|gene18816|gene3889|gene20029|gene10253|gene9948|gene9821|gene2120|gene17686|gene6988|gene11888|gene20823|gene12791|gene16021|gene4347|gene18392|gene15282|gene208|gene10304|gene16801|gene11335|gene11333	CCNA2;CREB5;CCNE2;IKBKE;MMP9;LOC106048210;IRF7;PTK2B;NFKBIA;MYC;NFATC1;LOC106029911;TRAF3;CASP3;TIRAP;LOC10603007823;FASLG;LOC106045119;LOC106032265;PSD92;PIK3CD;LOC106030078;FOS;PRKCB;STAT4;STAT1
7	map00410	beta-Alanine metabolism	KEGG PATHWAY	7/1553	36/11318	0.216799	0.71589	Metabolism	Metabolism of other amino acids	gene16586|gene16587|gene3295|gene18710|gene20768|gene3521|gene10595	LOC106045763;LOC106045817;ALDH2;GAD2;LOC106029637;UPB1;EHHADH
4	map00670	One carbon pool by folate	KEGG PATHWAY	4/1553	18/11318	0.226801	0.718959	Metabolism	Metabolism of cofactors and vitamins	gene4250|gene13081|gene18281|gene14460	SHMT1;MTHFD2L;MTHFD2;LOC106043431
32	map05163	Human cytomegalovirus infection	KEGG PATHWAY	32/1553	204/11318	0.232099	0.72847	Human Diseases	Infectious disease: viral	gene11193|gene2464|gene3669|gene8117|gene6988|gene7610|gene20029|gene10253|gene8744|gene9948|gene9821|gene12638|gene10735|gene12292|gene12290|gene12791|gene5926|gene9869|gene10970|gene16021|gene8006|gene18392|gene15282|gene10183|gene208|gene2596|gene14137|gene3569|gene5185|gene16801|gene9870|gene20641	IL10RA;CREB5;TRAF5;LOC106036455;CASP3;BLNK10;PTK2B;NFKBIA;TRAF2;MYC;NFATC1;LOC106041491;CXCR4;LOC106041040;LOC106041041;FASLG;GNG5;LOC106038356;ADCY7;LOC106045119;PTGER4;PSD92;PIK3CD;LOC106038708;LOC106030078;MB21D1;GNAO1;PXN;LOC106033294;PRKCB;LOC106038357;LOC106029502
25	map05164	Influenza A	KEGG PATHWAY	25/1553	157/11318	0.240362	0.739754	Human Diseases	Infectious disease: viral	gene12292|gene12437|gene12557|gene4107|gene3889|gene6988|gene15178|gene17768|gene10253|gene6479|gene13649|gene15282|gene17686|gene16645|gene12791|gene20840|gene19934|gene208|gene8304|gene5185|gene20407|gene16801|gene20405|gene7825|gene11333	LOC106041040;CIITA;IKBKE;TNFSF10;IRF7;CASP3;PML;LOC106047050;NFKBIA;KPNA2;LOC1060407229;PIK3CD;TRAF3;CCND3;FASLG;LOC10603007840;LOC106049424;LOC106030078;XPO1;LOC106033294;LOC106049920;PRKCB;LOC106049922;LOC106036132;STAT1
7	map00980	Metabolism of xenobiotics by cytochrome P450	KEGG PATHWAY	7/1553	37/11318	0.238118	0.740035	Metabolism	Xenobiotics biodegradation and metabolism	gene15194|gene2668|gene20701|gene20702|gene12209|gene1971|gene3683	LOC106044188;LOC106030437;LOC106029566;LOC106029567;MGST2;LOC1060341971;EPHX1
20	map05034	Alcoholism	KEGG PATHWAY	20/1553	124/11318	0.251409	0.759016	Human Diseases	Substance dependence	gene12691|gene2464|gene1566|gene10183|gene18781|gene5926|gene14137|gene18723|gene1575|gene8728|gene1570|gene1571|gene20120|gene6291|gene1583|gene1582|gene1578|gene2822|gene1587|gene1569	CAMKK1;CREB5;LOC106045814;LOC106038708;GRIN3B;GNG5;GNAO1;LOC106048111;LOC106045840;GRIN1;LOC106045851;LOC106045128;LOC106049629;HDAC4;LOC1060481533;LOC1060481532;LOC106045890;PKIA;LOC1060481537;LOC106045823
21	map04217	Necroptosis	KEGG PATHWAY	21/1553	131/11318	0.25384	0.759125	Cellular Processes	Cell growth and death	gene18816|gene1361|gene17768|gene13288|gene11333|gene8744|gene12791|gene18723|gene1364|gene4840|gene1575|gene11335|gene3669|gene1569|gene20120|gene3696|gene17700|gene1582|gene14429|gene1587|gene4107	LOC106048210;LOC106043002;LOC106047050;LOC106042157;STAT1;TRAF2;FASLG;LOC106048111;LOC106040722;SQSTM1;LOC106045840;STAT4;TRAF5;LOC106045823;LOC106049629;CAPN2;HSP90AA1;LOC1060481532;LOC106043382;LOC1060481537;TNFSF10
8	map04623	Cytosolic DNA-sensing pathway	KEGG PATHWAY	8/1553	44/11318	0.250418	0.763294	Organismal Systems	Immune system	gene12292|gene12290|gene10253|gene208|gene2596|gene12557|gene5185|gene3889	LOC106041040;LOC106041041;NFKBIA;LOC106030078;MB21D1;IKBKE;LOC106033294;IRF7
11	map05133	Pertussis	KEGG PATHWAY	11/1553	66/11318	0.291454	0.824918	Human Diseases	Infectious disease: bacterial	gene6988|gene4749|gene11984|gene17768|gene10183|gene10304|gene20338|gene11888|gene2836|gene19767|gene2370	CASP3;IRF1;C5;LOC106047050;LOC106038708;FOS;LOC106049849;TIRAP;LY96;LOC10603419767;ITGB2
27	map05168	Herpes simplex virus 1 infection	KEGG PATHWAY	27/1553	175/11318	0.284788	0.828235	Human Diseases	Infectious disease: viral	gene12292|gene11984|gene12557|gene3669|gene4347|gene6988|gene15178|gene3889|gene10253|gene8744|gene11125|gene19019|gene15282|gene17686|gene17507|gene20823|gene12791|gene20840|gene16004|gene15263|gene208|gene2596|gene5185|gene20407|gene20405|gene20641|gene11333	LOC106041040;C5;IKBKE;TRAF5;LOC106032265;CASP3;PML;IRF7;NFKBIA;TRAF2;POU2F3;CHRM39;PIK3CD;TRAF3;LOC106046816;LOC10603007823;FASLG;LOC10603007840;SYK;LOC106044308;LOC106030078;MB21D1;LOC106033294;LOC106049920;LOC106049922;LOC106029502;STAT1
4	map00053	Ascorbate and aldarate metabolism	KEGG PATHWAY	4/1553	20/11318	0.290835	0.830583	Metabolism	Carbohydrate metabolism	gene20768|gene16586|gene16587|gene3295	LOC106029637;LOC106045763;LOC106045817;ALDH2
5	map00062	Fatty acid elongation	KEGG PATHWAY	5/1553	26/11318	0.280547	0.831153	Metabolism	Lipid metabolism	gene7393|gene1468|gene1336|gene19151|gene17906	ELOVL7;HSD17B12;LOC106042682;ELOVL4;ACOT7
5	map00534	Glycosaminoglycan biosynthesis - heparan sulfate / heparin	KEGG PATHWAY	5/1553	26/11318	0.280547	0.831153	Metabolism	Glycan biosynthesis and metabolism	gene10004|gene5436|gene10117|gene20821|gene11647	EXT1;XYLT1;NDST4;LOC10603007821;HS6ST1
15	map00561	Glycerolipid metabolism	KEGG PATHWAY	15/1553	93/11318	0.290455	0.837039	Metabolism	Lipid metabolism	gene9602|gene20702|gene12296|gene16586|gene14345|gene8924|gene16587|gene3295|gene4974|gene12872|gene7962|gene3893|gene3103|gene1417|gene20768	MGLL;LOC106029567;LOC106041043;LOC106045763;GK;LIPG;LOC106045817;ALDH2;PPAP2B;MBOAT1;MOGAT1;PNPLA2;LOC106030914;DGKZ;LOC106029637
23	map04218	Cellular senescence	KEGG PATHWAY	23/1553	149/11318	0.303727	0.837231	Cellular Processes	Cell growth and death	gene17512|gene5647|gene13574|gene14429|gene2720|gene12556|gene5173|gene16645|gene9948|gene9821|gene11894|gene2120|gene15282|gene3696|gene16021|gene4606|gene18392|gene349|gene10183|gene20037|gene18740|gene4840|gene11883	CDC25A;CCNB2;CCNA2;LOC106043382;CCNE2;RASSF5;E2F4;CCND3;MYC;NFATC1;ETS1;LOC106029911;PIK3CD;CAPN2;LOC106045119;TRAF3IP2;PSD92;CDK1;LOC106038708;CCNB3;FOXM1;SQSTM1;CHEK1
9	map00600	Sphingolipid metabolism	KEGG PATHWAY	9/1553	53/11318	0.298993	0.838767	Metabolism	Lipid metabolism	gene10163|gene13528|gene16929|gene4974|gene18974|gene7964|gene19078|gene3515|gene8261	SGMS2;ACER3;SMPD2;PPAP2B;ACER1;SGPP2;LOC106048496;SMPD4;SPTLC3
2	map00430	Taurine and hypotaurine metabolism	KEGG PATHWAY	2/1553	8/11318	0.302267	0.840514	Metabolism	Metabolism of other amino acids	gene18710|gene16291	GAD2;GGT7
5	map00601	Glycosphingolipid biosynthesis - lacto and neolacto series	KEGG PATHWAY	5/1553	27/11318	0.308855	0.844025	Metabolism	Glycan biosynthesis and metabolism	gene9754|gene3320|gene6041|gene8754|gene863	A4GALT;B3GNT4;FUT4;FUT7;B4GALT3
9	map05134	Legionellosis	KEGG PATHWAY	9/1553	55/11318	0.339216	0.903626	Human Diseases	Infectious disease: bacterial	gene6988|gene11359|gene10253|gene20823|gene3700|gene2370|gene4347|gene11109|gene184	CASP3;HSPD1;NFKBIA;LOC10603007823;TLR5;ITGB2;LOC106032265;HSPA8;NFKB2
5	map03410	Base excision repair	KEGG PATHWAY	5/1553	28/11318	0.33753	0.906753	Genetic Information Processing	Replication and repair	gene18126|gene12913|gene11723|gene5395|gene5095	POLE;NEIL3;PARP4;POLN5;MUTYH
8	map00330	Arginine and proline metabolism	KEGG PATHWAY	8/1553	48/11318	0.334776	0.907041	Metabolism	Amino acid metabolism	gene18134|gene3800|gene16586|gene16587|gene3295|gene20768|gene9378|gene13830	LOC106047481;ARG2;LOC106045763;LOC106045817;ALDH2;LOC106029637;SAT1;ERCC630
35	map04014	Ras signaling pathway	KEGG PATHWAY	35/1553	237/11318	0.345837	0.913586	Environmental Information Processing	Signal transduction	gene15854|gene8973|gene16782|gene19948|gene848|gene12556|gene9326|gene7610|gene7321|gene5563|gene15094|gene15359|gene11513|gene11894|gene7975|gene15282|gene8728|gene13562|gene12791|gene12357|gene17756|gene5926|gene1364|gene1361|gene7519|gene18968|gene19217|gene15263|gene4849|gene10183|gene208|gene19271|gene19270|gene6002|gene16801	INSR;FGF13;LOC106045971;RASAL3;PLA1A;RASSF5;FIGF;BLNK10;HGF;FGF7;RALGDS;FGFR1;LOC106040243;ETS1;FGF10;PIK3CD;GRIN1;FGF2;FASLG;FLT3;PAK6;GNG5;LOC106040722;LOC106043002;IGF1;ZAP70;RASGRF1;LOC106044308;PDGFRB;LOC106038708;LOC106030078;PIK3AP171;PIK3AP170;EVC2;PRKCB
25	map05167	Kaposi sarcoma-associated herpesvirus infection	KEGG PATHWAY	25/1553	167/11318	0.351185	0.920047	Human Diseases	Infectious disease: viral	gene12557|gene14442|gene3889|gene6988|gene10253|gene8744|gene12998|gene17812|gene9948|gene9821|gene17686|gene13562|gene15282|gene5926|gene9868|gene9869|gene16021|gene16004|gene18392|gene10183|gene208|gene10304|gene9870|gene10479|gene11333	IKBKE;RCAN1;IRF7;CASP3;NFKBIA;TRAF2;CCR4;HCK;MYC;NFATC1;TRAF3;FGF2;PIK3CD;GNG5;LOC106038377;LOC106038356;LOC106045119;SYK;PSD92;LOC106038708;LOC106030078;FOS;LOC106038357;LYN;STAT1
9	map00590	Arachidonic acid metabolism	KEGG PATHWAY	9/1553	56/11318	0.359656	0.934516	Metabolism	Lipid metabolism	gene1361|gene19950|gene1364|gene197|gene4862|gene4837|gene4834|gene3225|gene11513	LOC106043002;LOC106049439;LOC106040722;LOC106034197;GPX3;LOC106032815;LOC106032894;TBXAS1;LOC106040243
12	map04391	Hippo signaling pathway - fly	KEGG PATHWAY	12/1553	77/11318	0.364613	0.939693	Environmental Information Processing	Signal transduction	gene1239|gene7046|gene15756|gene18521|gene2720|gene9948|gene16388|gene18300|gene19819|gene13549|gene16183|gene12140	TSHZ2;STK3;LOC1060458406;ZDHHC18;CCNE2;MYC;LOC106045529;RASSF2;SAV1;FAT4;PARD3;TEAD1
6	map04216	Ferroptosis	KEGG PATHWAY	6/1553	36/11318	0.372276	0.951704	Cellular Processes	Cell growth and death	gene13288|gene4029|gene9378|gene18333|gene12219|gene16186	LOC106042157;ACSL5;SAT1;CP;SLC7A11;SLC39A8
13	map01522	Endocrine resistance	KEGG PATHWAY	13/1553	85/11318	0.382219	0.954043	Human Diseases	Drug resistance: antineoplastic	gene7519|gene12773|gene17850|gene5530|gene15282|gene14183|gene13840|gene10970|gene18051|gene16021|gene5032|gene10304|gene18392	IGF1;NOTCH2;MMP9;GPER1;PIK3CD;MMP2;HBEGF;ADCY7;CARM1;LOC106045119;CDKN2C;FOS;PSD92
10	map04924	Renin secretion	KEGG PATHWAY	10/1553	64/11318	0.381279	0.959251	Organismal Systems	Endocrine system	gene16349|gene16949|gene12131|gene10183|gene17316|gene4367|gene7870|gene8006|gene12192|gene5948	PDE1C;CACNA1S;EDN3;LOC106038708;EDN2;GUCY1A3;AGTR1;PTGER4;PDE3B;LOC106034001
8	map05204	Chemical carcinogenesis	KEGG PATHWAY	8/1553	50/11318	0.378586	0.960095	Human Diseases	Cancer: overview	gene15194|gene2668|gene197|gene20701|gene20702|gene12209|gene1971|gene3683	LOC106044188;LOC106030437;LOC106034197;LOC106029566;LOC106029567;MGST2;LOC1060341971;EPHX1
9	map03460	Fanconi anemia pathway	KEGG PATHWAY	9/1553	58/11318	0.400888	0.962739	Genetic Information Processing	Replication and repair	gene19919|gene16927|gene16887|gene18014|gene18818|gene540|gene1996|gene17737|gene539	FAAP100;FANCE;UBE2T;FANCC;FANCB;HAUS3;POLH;RAD51;POLN
4	map04966	Collecting duct acid secretion	KEGG PATHWAY	4/1553	23/11318	0.389944	0.965722	Organismal Systems	Excretory system	gene14247|gene2944|gene16734|gene3373	ATP6V1B1;ATP6V1C2;LOC106045951;TCTN2
12	map05120	Epithelial cell signaling in Helicobacter pylori infection	KEGG PATHWAY	12/1553	79/11318	0.399824	0.967512	Human Diseases	Infectious disease: bacterial	gene6988|gene12292|gene2944|gene15263|gene10253|gene14247|gene3373|gene13840|gene208|gene5185|gene15479|gene10479	CASP3;LOC106041040;ATP6V1C2;LOC106044308;NFKBIA;ATP6V1B1;TCTN2;HBEGF;LOC106030078;LOC106033294;PTPRZ1;LYN
5	map01523	Antifolate resistance	KEGG PATHWAY	5/1553	30/11318	0.395291	0.971373	Human Diseases	Drug resistance: antineoplastic	gene208|gene4250|gene19904|gene13059|gene14460	LOC106030078;SHMT1;ABCC5;ABCG2;LOC106043431
13	map04520	Adherens junction	KEGG PATHWAY	13/1553	86/11318	0.399116	0.97323	Cellular Processes	Cellular community - eukaryotes	gene15854|gene7610|gene10159|gene2120|gene4032|gene4772|gene16183|gene6749|gene17323|gene10022|gene15359|gene5867|gene18465	INSR;BLNK10;LEF1;LOC106029911;TCF7L2;HPSE272;PARD3;PTPRM;LOC106046592;LOC106038521;FGFR1;PTPRF;NFKB265
10	map01524	Platinum drug resistance	KEGG PATHWAY	10/1553	66/11318	0.42029	0.994269	Human Diseases	Drug resistance: antineoplastic	gene6988|gene2668|gene8056|gene11583|gene12791|gene12209|gene1996|gene20078|gene14202|gene15282	CASP3;LOC106030437;PMAIP1;XPA;FASLG;MGST2;POLH;TOP2A;MSH2;PIK3CD
3	map00910	Nitrogen metabolism	KEGG PATHWAY	3/1553	17/11318	0.41894	0.998525	Metabolism	Energy metabolism	gene3486|gene10501|gene17235	LOC106031280;CA8;CA5A
9	map03013	RNA transport	KEGG PATHWAY	9/1553	222/11318	1	1	Genetic Information Processing	Translation	gene7041|gene11429|gene16579|gene8304|gene14952|gene12909|gene18839|gene6590|gene4907	POP1;NUP210;GEMIN4;XPO1;NUP54;NUP153;NUP160;NUP85;CYFIP2
20	map04621	NOD-like receptor signaling pathway	KEGG PATHWAY	20/1553	138/11318	0.432794	1	Organismal Systems	Immune system	gene17686|gene12292|gene17768|gene13288|gene10253|gene208|gene14429|gene17700|gene20599|gene12557|gene8744|gene9668|gene5185|gene17145|gene3669|gene18290|gene11333|gene3889|gene15161|gene14154	TRAF3;LOC106041040;LOC106047050;LOC106042157;NFKBIA;LOC106030078;LOC106043382;HSP90AA1;LOC106029457;IKBKE;TRAF2;LOC106038139;LOC106033294;LOC106046397;TRAF5;ANTXR1;STAT1;IRF7;PSTPIP1;LOC106043112
13	map05100	Bacterial invasion of epithelial cells	KEGG PATHWAY	13/1553	89/11318	0.449968	1	Human Diseases	Infectious disease: bacterial	gene5347|gene18748|gene9200|gene15282|gene4318|gene12795|gene3569|gene12024|gene17969|gene6346|gene19119|gene10440|gene17323	SEPT12;LOC106048163;SEPT6;PIK3CD;ARHGAP10;DNM3;PXN;LOC106040731;DNM1;FN1;RHOG;DOCK1;LOC106046592
22	map05225	Hepatocellular carcinoma	KEGG PATHWAY	22/1553	154/11318	0.454391	1	Human Diseases	Cancer: specific types	gene19671|gene3401|gene12209|gene16171|gene13515|gene4772|gene7321|gene4032|gene9948|gene10796|gene18485|gene15282|gene2668|gene10159|gene2120|gene12509|gene16021|gene11855|gene18392|gene2357|gene11073|gene16801	WNT4;FZD10;MGST2;FZD8;WNT11;HPSE272;HGF;TCF7L2;MYC;WNT10A;LOC106047829;PIK3CD;LOC106030437;LEF1;LOC106029911;WNT2B;LOC106045119;WNT5A;PSD92;FZD7;FZD1;PRKCB
3	map00533	Glycosaminoglycan biosynthesis - keratan sulfate	KEGG PATHWAY	3/1553	18/11318	0.457367	1	Metabolism	Glycan biosynthesis and metabolism	gene1404|gene16269|gene863	CHST1;TNFRSF13C9;B4GALT3
2	map00072	Synthesis and degradation of ketone bodies	KEGG PATHWAY	2/1553	11/11318	0.457855	1	Metabolism	Lipid metabolism	gene2647|gene10701	HMGCLL1;BDH1
8	map04742	Taste transduction	KEGG PATHWAY	8/1553	54/11318	0.466549	1	Organismal Systems	Sensory system	gene16349|gene8759|gene1164|gene15547|gene1901|gene16816|gene2993|gene6243	PDE1C;ENTPD2;LOC106041081;LOC106044607;CHRM3;SCNN1B;GABRA2;GABRA1
13	map05210	Colorectal cancer	KEGG PATHWAY	13/1553	91/11318	0.483695	1	Human Diseases	Cancer: specific types	gene6988|gene15282|gene7610|gene8056|gene10159|gene13078|gene2120|gene4032|gene15094|gene9948|gene4772|gene14202|gene10304	CASP3;PIK3CD;BLNK10;PMAIP1;LEF1;AREG;LOC106029911;TCF7L2;RALGDS;MYC;HPSE272;MSH2;FOS
4	map00340	Histidine metabolism	KEGG PATHWAY	4/1553	26/11318	0.486906	1	Metabolism	Amino acid metabolism	gene20768|gene16586|gene16587|gene3295	LOC106029637;LOC106045763;LOC106045817;ALDH2
6	map00260	Glycine, serine and threonine metabolism	KEGG PATHWAY	6/1553	41/11318	0.500484	1	Metabolism	Amino acid metabolism	gene7627|gene19474|gene13239|gene4250|gene12631|gene15113	BLNK27;CHDH;DMGDH;SHMT1;PSPH;SARDH
13	map04350	TGF-beta signaling pathway	KEGG PATHWAY	13/1553	93/11318	0.517012	1	Environmental Information Processing	Signal transduction	gene8503|gene3818|gene8539|gene2646|gene5570|gene2120|gene16477|gene9948|gene11494|gene1982|gene13967|gene17183|gene5173	ACVR2B;THBS1;DCN;BMP5;FBN1;LOC106029911;LOC106045698;MYC;LOC106040155;LTBP1;INHBA;TFDP1;E2F4
4	map00650	Butanoate metabolism	KEGG PATHWAY	4/1553	27/11318	0.517872	1	Metabolism	Carbohydrate metabolism	gene2647|gene18710|gene10595|gene10701	HMGCLL1;GAD2;EHHADH;BDH1
4	map05020	Prion diseases	KEGG PATHWAY	4/1553	27/11318	0.517872	1	Human Diseases	Neurodegenerative disease	gene12292|gene11984|gene5185|gene8002	LOC106041040;C5;LOC106033294;C7
1	map00400	Phenylalanine, tyrosine and tryptophan biosynthesis	KEGG PATHWAY	1/1553	5/11318	0.521974	1	Metabolism	Amino acid metabolism	gene7523	PAH
3	map00511	Other glycan degradation	KEGG PATHWAY	3/1553	20/11318	0.530639	1	Metabolism	Glycan biosynthesis and metabolism	gene17463|gene591|gene19078	ENGASE;LOC106035038;LOC106048496
20	map04210	Apoptosis	KEGG PATHWAY	20/1553	146/11318	0.540111	1	Cellular Processes	Cell growth and death	gene6988|gene17954|gene11723|gene8056|gene10253|gene208|gene12791|gene15282|gene11989|gene14384|gene8744|gene15892|gene3891|gene16684|gene20089|gene19789|gene3696|gene11741|gene10304|gene4107	CASP3;ENDOG;PARP4;PMAIP1;NFKBIA;LOC106030078;FASLG;PIK3CD;DAB2IP;BCL2A1;TRAF2;LOC106044971;PIDD1;LOC106045884;DDIT3;LOC10603419789;CAPN2;LMNB1;FOS;TNFSF10
14	map04625	C-type lectin receptor signaling pathway	KEGG PATHWAY	14/1553	102/11318	0.543445	1	Organismal Systems	Immune system	gene4749|gene16487|gene17768|gene10183|gene208|gene15282|gene184|gene12557|gene10253|gene9821|gene17067|gene11333|gene16004|gene15263	IRF1;LOC106045683;LOC106047050;LOC106038708;LOC106030078;PIK3CD;NFKB2;IKBKE;NFKBIA;NFATC1;LOC106046287;STAT1;SYK;LOC106044308
4	map00592	alpha-Linolenic acid metabolism	KEGG PATHWAY	4/1553	28/11318	0.547929	1	Metabolism	Lipid metabolism	gene1361|gene8482|gene1364|gene11513	LOC106043002;PLA1A2;LOC106040722;LOC106040243
6	map04340	Hedgehog signaling pathway	KEGG PATHWAY	6/1553	43/11318	0.549346	1	Environmental Information Processing	Signal transduction	gene600|gene20461|gene16992|gene2087|gene929|gene11882	EVC;ADRBK1;CSNK1G3;LOC1060300787;GPR161;CDON
2	map00603	Glycosphingolipid biosynthesis - globo and isoglobo series	KEGG PATHWAY	2/1553	13/11318	0.549806	1	Metabolism	Glycan biosynthesis and metabolism	gene9754|gene16269	A4GALT;TNFRSF13C9
8	map04213	Longevity regulating pathway - multiple species	KEGG PATHWAY	8/1553	58/11318	0.551562	1	Organismal Systems	Aging	gene15854|gene7519|gene15282|gene10060|gene10970|gene15402|gene1504|gene11109	INSR;IGF1;PIK3CD;IRS4;ADCY7;IRS2;CAT;HSPA8
10	map04920	Adipocytokine signaling pathway	KEGG PATHWAY	10/1553	73/11318	0.554013	1	Organismal Systems	Endocrine system	gene11543|gene15263|gene208|gene10253|gene8744|gene4029|gene10060|gene10220|gene2012|gene15402	TNFRSF1B;LOC106044308;LOC106030078;NFKBIA;TRAF2;ACSL5;IRS4;PRKCQ;NFKBIE;IRS2
19	map04068	FoxO signaling pathway	KEGG PATHWAY	19/1553	140/11318	0.558356	1	Environmental Information Processing	Signal transduction	gene15282|gene7519|gene16810|gene1484|gene1485|gene15854|gene208|gene12791|gene20037|gene10060|gene8025|gene20058|gene8030|gene15751|gene15402|gene1504|gene4107|gene2120|gene5647	PIK3CD;IGF1;PLK1;RAG2;RAG1;INSR;LOC106030078;FASLG;CCNB3;IRS4;LOC106036387;MRPL148;IL7R;BCL6;IRS2;CAT;TNFSF10;LOC106029911;CCNB2
14	map05410	Hypertrophic cardiomyopathy (HCM)	KEGG PATHWAY	14/1553	103/11318	0.559	1	Human Diseases	Cardiovascular disease	gene6607|gene7519|gene3016|gene19308|gene7346|gene13298|gene7322|gene2286|gene14670|gene16356|gene16949|gene3842|gene4508|gene11690	ITGB4;IGF1;SGCB;DAG1;ITGA2;LOC106042166;CACNA2D1;TTN;ITGA11;ITGA9;CACNA1S;ACTC1;LAMA2;SGCG
7	map02010	ABC transporters	KEGG PATHWAY	7/1553	51/11318	0.561378	1	Environmental Information Processing	Membrane transport	gene11141|gene6349|gene13059|gene19904|gene9726|gene20641|gene6446	ABCG4;ABCA12;ABCG2;ABCC5;ABCC9;LOC106029502;LOC106034745
13	map04070	Phosphatidylinositol signaling system	KEGG PATHWAY	13/1553	96/11318	0.565763	1	Environmental Information Processing	Signal transduction	gene17626|gene14041|gene10808|gene10183|gene15282|gene14042|gene12589|gene18766|gene16801|gene6151|gene11669|gene1417|gene18296	PLCD3;CHST11;PLCD4;LOC106038708;PIK3CD;CHST12;PIK3C2B;CDS1;PRKCB;SYNJ2;INPP5D;DGKZ;CDS2
4	map04977	Vitamin digestion and absorption	KEGG PATHWAY	4/1553	29/11318	0.576974	1	Organismal Systems	Digestive system	gene6070|gene19882|gene6186|gene11205	LOC106034162;SLC52A3;SLC23A1;LOC106039769
4	map00790	Folate biosynthesis	KEGG PATHWAY	4/1553	29/11318	0.576974	1	Metabolism	Metabolism of cofactors and vitamins	gene3103|gene15033|gene7523|gene15943	LOC106030914;GCH1;PAH;MOCOS
7	map04330	Notch signaling pathway	KEGG PATHWAY	7/1553	52/11318	0.582951	1	Environmental Information Processing	Signal transduction	gene12773|gene7614|gene2495|gene16381|gene2815|gene6031|gene700	NOTCH2;BLNK14;KAT2B;DTX1;HEY1;MAML2;RBPJ
48	map04080	Neuroactive ligand-receptor interaction	KEGG PATHWAY	48/1553	357/11318	0.585237	1	Environmental Information Processing	Signaling molecules and interaction	gene11094|gene11984|gene6965|gene7491|gene18781|gene1901|gene15544|gene11635|gene9086|gene6432|gene7368|gene1164|gene8472|gene3342|gene7367|gene745|gene18170|gene17316|gene2993|gene7870|gene15495|gene10777|gene12521|gene8728|gene8354|gene12116|gene16559|gene11634|gene12131|gene11636|gene11403|gene6792|gene158|gene14165|gene19934|gene6247|gene8006|gene6243|gene14211|gene16395|gene14052|gene14053|g…	CALCR;C5;MTNR1A;P2RY8;GRIN3B;CHRM3;LOC106044634;LOC106040280;TAC1;SSTR2;LOC106035576;LOC106041081;CRHR2;LOC106031149;LOC106035583;BDKRB1;LOC106047519;EDN2;GABRA2;AGTR1;TSHR;SCTR;LOC106041380;GRIN1;OXTR;HRH3;GPR156;LOC106040278;EDN3;LOC106040281;HRH1;MC5R;LOC106048153;LOC106043093;LOC106049424;GABRB2;PTGER4;GABRA1;LHCGR;LOC106045569;LPAR4;LOC106042993;LPAR1;NPFFR1;PARD3;MRPL148;CHRNA9;NTS
12	map05032	Morphine addiction	KEGG PATHWAY	12/1553	90/11318	0.589466	1	Human Diseases	Substance dependence	gene16349|gene20461|gene6243|gene5926|gene14137|gene10970|gene2993|gene16801|gene556|gene6247|gene12192|gene13875	PDE1C;ADRBK1;GABRA1;GNG5;GNAO1;ADCY7;GABRA2;PRKCB;GRK4;GABRB2;PDE3B;ERCC675
16	map04270	Vascular smooth muscle contraction	KEGG PATHWAY	16/1553	120/11318	0.589967	1	Organismal Systems	Circulatory system	gene1361|gene8074|gene16949|gene1364|gene12131|gene10183|gene7870|gene19283|gene10970|gene17316|gene4367|gene16801|gene11513|gene4127|gene10996|gene10220	LOC106043002;NPR2;CACNA1S;LOC106040722;EDN3;LOC106038708;AGTR1;PIK3AP183;ADCY7;EDN2;GUCY1A3;PRKCB;LOC106040243;LOC106032022;MYLK3;PRKCQ
6	map04978	Mineral absorption	KEGG PATHWAY	6/1553	45/11318	0.595927	1	Organismal Systems	Digestive system	gene14429|gene11064|gene11065|gene2218|gene695|gene16397	LOC106043382;STEAP1;STEAP2;LOC106029992;SLC34A2;HEPH
6	map04979	Cholesterol metabolism	KEGG PATHWAY	6/1553	46/11318	0.618229	1	Organismal Systems	Digestive system	gene4109|gene19549|gene16473|gene218|gene11205|gene17847	NCEH1;LRP1;ANGPTL4;LOC106030157;LOC106039769;PLTP
6	map00565	Ether lipid metabolism	KEGG PATHWAY	6/1553	46/11318	0.618229	1	Metabolism	Lipid metabolism	gene1361|gene1364|gene8850|gene4974|gene11513|gene9713	LOC106043002;LOC106040722;PLD4;PPAP2B;LOC106040243;PLA2G7
6	map04962	Vasopressin-regulated water reabsorption	KEGG PATHWAY	6/1553	46/11318	0.618229	1	Organismal Systems	Excretory system	gene11623|gene4861|gene3557|gene3558|gene3559|gene2464	LOC106040258;DCTN4;LOC106031353;LOC106031351;LOC106031352;CREB5
10	map04721	Synaptic vesicle cycle	KEGG PATHWAY	10/1553	77/11318	0.624809	1	Organismal Systems	Nervous system	gene10243|gene11623|gene2944|gene14247|gene19563|gene14178|gene12795|gene3373|gene17969|gene1662	LOC106038813;LOC106040258;ATP6V1C2;ATP6V1B1;SLC6A9;DGKZ8;DNM3;TCTN2;DNM1;SYT1
4	map00591	Linoleic acid metabolism	KEGG PATHWAY	4/1553	31/11318	0.631721	1	Metabolism	Lipid metabolism	gene1361|gene11513|gene1364|gene197	LOC106043002;LOC106040243;LOC106040722;LOC106034197
12	map03320	PPAR signaling pathway	KEGG PATHWAY	12/1553	93/11318	0.63675	1	Organismal Systems	Endocrine system	gene8482|gene14345|gene4029|gene16473|gene20702|gene8086|gene6260|gene20117|gene6009|gene11205|gene10595|gene17847	PLA1A2;GK;ACSL5;ANGPTL4;LOC106029567;PLIN1;FABP6;LOC106049619;EVC9;LOC106039769;EHHADH;PLTP
8	map04730	Long-term depression	KEGG PATHWAY	8/1553	63/11318	0.648896	1	Organismal Systems	Nervous system	gene1361|gene7519|gene1364|gene14137|gene4367|gene16801|gene3529|gene10479	LOC106043002;IGF1;LOC106040722;GNAO1;GUCY1A3;PRKCB;GNAZ;LYN
12	map04928	Parathyroid hormone synthesis, secretion and action	KEGG PATHWAY	12/1553	94/11318	0.651867	1	Organismal Systems	Endocrine system	gene6562|gene6887|gene10304|gene2464|gene15359|gene13840|gene10970|gene10230|gene8156|gene16801|gene695|gene8117	LOC106034617;TNFSF11;FOS;CREB5;FGFR1;HBEGF;ADCY7;GATA3;MEF2A;PRKCB;SLC34A2;LOC106036455
10	map05220	Chronic myeloid leukemia	KEGG PATHWAY	10/1553	79/11318	0.657925	1	Human Diseases	Cancer: specific types	gene15263|gene10253|gene208|gene15282|gene14438|gene9948|gene4080|gene16021|gene2120|gene18392	LOC106044308;NFKBIA;LOC106030078;PIK3CD;RUNX1;MYC;MECOM;LOC106045119;LOC106029911;PSD92
3	map00515	Mannose type O-glycan biosynthesis	KEGG PATHWAY	3/1553	24/11318	0.658709	1	Metabolism	Glycan biosynthesis and metabolism	gene9051|gene6041|gene863	ISPD;FUT4;B4GALT3
13	map04713	Circadian entrainment	KEGG PATHWAY	13/1553	103/11318	0.670851	1	Organismal Systems	Environmental adaptation	gene12762|gene4233|gene10183|gene10304|gene6965|gene5926|gene14137|gene10970|gene4257|gene16801|gene11991|gene8728|gene4367	NOS1AP;RASD1;LOC106038708;FOS;MTNR1A;GNG5;GNAO1;ADCY7;CACNA1H;PRKCB;LOC106040661;GRIN1;GUCY1A3
10	map04146	Peroxisome	KEGG PATHWAY	10/1553	80/11318	0.673845	1	Cellular Processes	Transport and catabolism	gene2647|gene8482|gene4029|gene4620|gene7675|gene5420|gene1504|gene20117|gene10595|gene14753	HMGCLL1;PLA1A2;ACSL5;DDO;BLNK75;MPV17L;CAT;LOC106049619;EHHADH;NUDT12
3	map04320	Dorso-ventral axis formation	KEGG PATHWAY	3/1553	25/11318	0.686466	1	Organismal Systems	Development and regeneration	gene11894|gene12773|gene19016	ETS1;NOTCH2;CHRM36
3	map00040	Pentose and glucuronate interconversions	KEGG PATHWAY	3/1553	25/11318	0.686466	1	Metabolism	Carbohydrate metabolism	gene3103|gene9051|gene12624	LOC106030914;ISPD;GUSB
1	map04711	Circadian rhythm - fly	KEGG PATHWAY	1/1553	8/11318	0.693063	1	Organismal Systems	Environmental adaptation	gene6519	HLF
17	map05418	Fluid shear stress and atherosclerosis	KEGG PATHWAY	17/1553	136/11318	0.698592	1	Human Diseases	Cardiovascular disease	gene15282|gene8503|gene7610|gene2668|gene10183|gene208|gene10829|gene14183|gene4840|gene12209|gene8965|gene8156|gene15892|gene17700|gene12339|gene17850|gene10304	PIK3CD;ACVR2B;BLNK10;LOC106030437;LOC106038708;LOC106030078;VCAM1;MMP2;SQSTM1;MGST2;NOX1;MEF2A;LOC106044971;HSP90AA1;NCF1;MMP9;FOS
7	map00280	Valine, leucine and isoleucine degradation	KEGG PATHWAY	7/1553	58/11318	0.700084	1	Metabolism	Amino acid metabolism	gene8482|gene16586|gene16587|gene3295|gene2647|gene20768|gene10595	PLA1A2;LOC106045763;LOC106045817;ALDH2;HMGCLL1;LOC106029637;EHHADH
5	map04930	Type II diabetes mellitus	KEGG PATHWAY	5/1553	42/11318	0.70128	1	Human Diseases	Endocrine and metabolic disease	gene15854|gene15282|gene10060|gene15402|gene12442	INSR;PIK3CD;IRS4;IRS2;SOCS1
9	map05212	Pancreatic cancer	KEGG PATHWAY	9/1553	74/11318	0.702483	1	Human Diseases	Cancer: specific types	gene7610|gene208|gene15282|gene15094|gene17737|gene16021|gene11333|gene2120|gene18392	BLNK10;LOC106030078;PIK3CD;RALGDS;RAD51;LOC106045119;STAT1;LOC106029911;PSD92
30	map05131	Shigellosis	KEGG PATHWAY	30/1553	237/11318	0.712646	1	Human Diseases	Infectious disease: bacterial	gene16487|gene10808|gene14180|gene3700|gene5700|gene12024|gene3669|gene5347|gene17626|gene17768|gene9200|gene10253|gene8744|gene3696|gene10440|gene12292|gene11717|gene15282|gene14154|gene1497|gene18748|gene208|gene19373|gene2596|gene4840|gene3569|gene10220|gene5185|gene1571|gene1578	LOC106045683;PLCD4;LOC106043079;TLR5;TLN2;LOC106040731;TRAF5;SEPT12;PLCD3;LOC106047050;SEPT6;NFKBIA;TRAF2;CAPN2;DOCK1;LOC106041040;LOC106040409;PIK3CD;LOC106043112;LOC106044451;LOC106048163;LOC106030078;CAST;MB21D1;SQSTM1;PXN;PRKCQ;LOC106033294;LOC106045128;LOC106045890
7	map00983	Drug metabolism - other enzymes	KEGG PATHWAY	7/1553	59/11318	0.717333	1	Metabolism	Xenobiotics biodegradation and metabolism	gene12209|gene2668|gene17473|gene2935|gene3521|gene12624|gene12063	MGST2;LOC106030437;TK1;RRM2;UPB1;GUSB;UCKL1
17	map05160	Hepatitis C	KEGG PATHWAY	17/1553	138/11318	0.721465	1	Human Diseases	Infectious disease: viral	gene17686|gene19675|gene13709|gene6988|gene10253|gene208|gene12791|gene12557|gene8744|gene9948|gene18392|gene16021|gene6138|gene11333|gene3889|gene7825|gene15282	TRAF3;CLDN19;CD81;CASP3;NFKBIA;LOC106030078;FASLG;IKBKE;TRAF2;MYC;PSD92;LOC106045119;CLDN20;STAT1;IRF7;LOC106036132;PIK3CD
12	map04750	Inflammatory mediator regulation of TRP channels	KEGG PATHWAY	12/1553	99/11318	0.722025	1	Organismal Systems	Sensory system	gene1361|gene7519|gene1364|gene10183|gene11403|gene15282|gene197|gene745|gene10970|gene16801|gene8006|gene10220	LOC106043002;IGF1;LOC106040722;LOC106038708;HRH1;PIK3CD;LOC106034197;BDKRB1;ADCY7;PRKCB;PTGER4;PRKCQ
2	map00770	Pantothenate and CoA biosynthesis	KEGG PATHWAY	2/1553	18/11318	0.72913	1	Metabolism	Metabolism of cofactors and vitamins	gene20227|gene3521	PPCS;UPB1
16	map04142	Lysosome	KEGG PATHWAY	16/1553	131/11318	0.730244	1	Cellular Processes	Transport and catabolism	gene12624|gene218|gene6451|gene1752|gene19078|gene7034|gene3373|gene462|gene15892|gene13912|gene20267|gene9245|gene19789|gene4152|gene7955|gene6928	GUSB;LOC106030157;ARSG;GNS;LOC106048496;LAPTM4B;TCTN2;AP3M1;LOC106044971;LOC106042799;TPP1;IDS;LOC10603419789;LAMP3;AP1S3;HGSNAT
9	map00562	Inositol phosphate metabolism	KEGG PATHWAY	9/1553	76/11318	0.732604	1	Metabolism	Carbohydrate metabolism	gene17626|gene14041|gene10808|gene14042|gene15282|gene12589|gene6151|gene11669|gene14581	PLCD3;CHST11;PLCD4;CHST12;PIK3CD;PIK3C2B;SYNJ2;INPP5D;PLCH1
12	map00564	Glycerophospholipid metabolism	KEGG PATHWAY	12/1553	100/11318	0.734909	1	Metabolism	Lipid metabolism	gene1361|gene18766|gene12296|gene1364|gene8850|gene848|gene2125|gene12872|gene11513|gene4974|gene1417|gene18296	LOC106043002;CDS1;LOC106041043;LOC106040722;PLD4;PLA1A;LOC106029917;MBOAT1;LOC106040243;PPAP2B;DGKZ;CDS2
5	map00830	Retinol metabolism	KEGG PATHWAY	5/1553	44/11318	0.740287	1	Metabolism	Metabolism of cofactors and vitamins	gene15194|gene20701|gene20702|gene16712|gene197	LOC106044188;LOC106029566;LOC106029567;LOC106045912;LOC106034197
4	map00250	Alanine, aspartate and glutamate metabolism	KEGG PATHWAY	4/1553	36/11318	0.747332	1	Metabolism	Amino acid metabolism	gene18710|gene3044|gene6070|gene4620	GAD2;PPAT;LOC106034162;DDO
4	map04624	Toll and Imd signaling pathway	KEGG PATHWAY	4/1553	36/11318	0.747332	1	Organismal Systems	Immune system	gene350|gene10123|gene15343|gene10253	ANK3;ANK2;ANK1;NFKBIA
7	map00010	Glycolysis / Gluconeogenesis	KEGG PATHWAY	7/1553	61/11318	0.749775	1	Metabolism	Carbohydrate metabolism	gene16232|gene20701|gene20702|gene16586|gene16587|gene3295|gene20768	LOC106045365;LOC106029566;LOC106029567;LOC106045763;LOC106045817;ALDH2;LOC106029637
14	map04926	Relaxin signaling pathway	KEGG PATHWAY	14/1553	118/11318	0.760645	1	Organismal Systems	Endocrine system	gene15282|gene18170|gene14183|gene10253|gene2120|gene2464|gene10062|gene14137|gene5926|gene10970|gene9326|gene6009|gene17850|gene10304	PIK3CD;LOC106047519;MMP2;NFKBIA;LOC106029911;CREB5;COL4A6;GNAO1;GNG5;ADCY7;FIGF;EVC9;MMP9;FOS
4	map00982	Drug metabolism - cytochrome P450	KEGG PATHWAY	4/1553	37/11318	0.766763	1	Metabolism	Xenobiotics biodegradation and metabolism	gene20701|gene12209|gene20702|gene2668	LOC106029566;MGST2;LOC106029567;LOC106030437
30	map04144	Endocytosis	KEGG PATHWAY	30/1553	244/11318	0.770074	1	Cellular Processes	Transport and catabolism	gene2468|gene12024|gene16111|gene3488|gene15178|gene6760|gene6318|gene10215|gene8543|gene9042|gene10735|gene16183|gene11109|gene11426|gene2120|gene5491|gene12273|gene17969|gene12033|gene8009|gene9869|gene12795|gene9889|gene183|gene20461|gene7606|gene19351|gene556|gene9870|gene13875	WIPF3;LOC106040731;RAB11FIP2;LOC106031282;PML;RAB31;AGAP1;IL2RA;EEA1;IL2RG;CXCR4;PARD3;HSPA8;IQSEC1;LOC106029911;CYTH3;VPS37D;DNM1;MVB12B;DAB2;LOC106038356;DNM3;LOC106038418;PSD;ADRBK1;BLNK06;SH3GL2;GRK4;LOC106038357;ERCC675
11	map04974	Protein digestion and absorption	KEGG PATHWAY	11/1553	95/11318	0.77152	1	Organismal Systems	Digestive system	gene9578|gene17377|gene18649|gene2590|gene10062|gene3981|gene6331|gene19934|gene13482|gene3609|gene9717	COL7A1;COL6A6;PRCP;COL12A1;COL4A6;COL17A1;COL6A3;LOC106049424;KCNE3;LOC106031475;LOC106038159
1	map00740	Riboflavin metabolism	KEGG PATHWAY	1/1553	10/11318	0.771571	1	Metabolism	Metabolism of cofactors and vitamins	gene15424	LOC106044464
5	map00480	Glutathione metabolism	KEGG PATHWAY	5/1553	46/11318	0.775418	1	Metabolism	Metabolism of other amino acids	gene12209|gene2935|gene4862|gene2668|gene16291	MGST2;RRM2;GPX3;LOC106030437;GGT7
5	map05033	Nicotine addiction	KEGG PATHWAY	5/1553	46/11318	0.775418	1	Human Diseases	Substance dependence	gene6247|gene6243|gene18781|gene2993|gene8728	GABRB2;GABRA1;GRIN3B;GABRA2;GRIN1
8	map00310	Lysine degradation	KEGG PATHWAY	8/1553	71/11318	0.776086	1	Metabolism	Amino acid metabolism	gene16994|gene5721|gene16586|gene16587|gene3295|gene20768|gene5969|gene10595	PRDM6;HYKK;LOC106045763;LOC106045817;ALDH2;LOC106029637;WFS19;EHHADH
8	map04212	Longevity regulating pathway - worm	KEGG PATHWAY	8/1553	71/11318	0.776086	1	Organismal Systems	Aging	gene15854|gene11359|gene11723|gene2668|gene15282|gene12209|gene1504|gene9825	INSR;HSPD1;PARP4;LOC106030437;PIK3CD;MGST2;CAT;HSBP1L1
7	map04622	RIG-I-like receptor signaling pathway	KEGG PATHWAY	7/1553	63/11318	0.779474	1	Organismal Systems	Immune system	gene17686|gene10253|gene8744|gene12557|gene208|gene18619|gene3889	TRAF3;NFKBIA;TRAF2;IKBKE;LOC106030078;LOC106047988;IRF7
7	map05223	Non-small cell lung cancer	KEGG PATHWAY	7/1553	63/11318	0.779474	1	Human Diseases	Cancer: specific types	gene18816|gene15282|gene12556|gene16801|gene16021|gene2519|gene18392	LOC106048210;PIK3CD;RASSF5;PRKCB;LOC106045119;RARB;PSD92
7	map00240	Pyrimidine metabolism	KEGG PATHWAY	7/1553	63/11318	0.779474	1	Metabolism	Nucleotide metabolism	gene17473|gene2935|gene13726|gene3521|gene4833|gene12063|gene14963	TK1;RRM2;LOC106042626;UPB1;LOC106032673;UCKL1;DCK
3	map00860	Porphyrin and chlorophyll metabolism	KEGG PATHWAY	3/1553	29/11318	0.78055	1	Metabolism	Metabolism of cofactors and vitamins	gene18333|gene16397|gene12624	CP;HEPH;GUSB
3	map04341	Hedgehog signaling pathway - fly	KEGG PATHWAY	3/1553	29/11318	0.78055	1	Environmental Information Processing	Signal transduction	gene13875|gene556|gene16992	ERCC675;GRK4;CSNK1G3
2	map03430	Mismatch repair	KEGG PATHWAY	2/1553	20/11318	0.781834	1	Genetic Information Processing	Replication and repair	gene1912|gene14202	EXO1;MSH2
8	map04911	Insulin secretion	KEGG PATHWAY	8/1553	72/11318	0.78931	1	Organismal Systems	Endocrine system	gene11623|gene16949|gene7323|gene2464|gene1901|gene10970|gene16801|gene4127	LOC106040258;CACNA1S;PCLO;CREB5;CHRM3;ADCY7;PRKCB;LOC106032022
8	map04917	Prolactin signaling pathway	KEGG PATHWAY	8/1553	72/11318	0.78931	1	Organismal Systems	Endocrine system	gene4749|gene6887|gene15282|gene13920|gene10304|gene12442|gene14211|gene11333	IRF1;TNFSF11;PIK3CD;CISH;FOS;SOCS1;LHCGR;STAT1
10	map04012	ErbB signaling pathway	KEGG PATHWAY	10/1553	89/11318	0.796211	1	Environmental Information Processing	Signal transduction	gene5730|gene16801|gene13078|gene15282|gene17756|gene13840|gene9948|gene13836|gene400|gene11764	NRG4;PRKCB;AREG;PIK3CD;PAK6;HBEGF;MYC;NRG2;NRG3;NRG1
9	map04727	GABAergic synapse	KEGG PATHWAY	9/1553	81/11318	0.798623	1	Organismal Systems	Nervous system	gene10970|gene5926|gene14137|gene18710|gene2993|gene16801|gene6247|gene16949|gene6243	ADCY7;GNG5;GNAO1;GAD2;GABRA2;PRKCB;GABRB2;CACNA1S;GABRA1
9	map01521	EGFR tyrosine kinase inhibitor resistance	KEGG PATHWAY	9/1553	81/11318	0.798623	1	Human Diseases	Drug resistance: antineoplastic	gene7519|gene7321|gene4849|gene13562|gene15282|gene6002|gene13836|gene16801|gene11764	IGF1;HGF;PDGFRB;FGF2;PIK3CD;EVC2;NRG2;PRKCB;NRG1
4	map00620	Pyruvate metabolism	KEGG PATHWAY	4/1553	39/11318	0.80209	1	Metabolism	Carbohydrate metabolism	gene20768|gene16586|gene16587|gene3295	LOC106029637;LOC106045763;LOC106045817;ALDH2
13	map05231	Choline metabolism in cancer	KEGG PATHWAY	13/1553	115/11318	0.812592	1	Human Diseases	Cancer: overview	gene1361|gene7610|gene1364|gene4849|gene10304|gene15094|gene4974|gene6002|gene16801|gene10022|gene11757|gene1417|gene15282	LOC106043002;BLNK10;LOC106040722;PDGFRB;FOS;RALGDS;PPAP2B;EVC2;PRKCB;LOC106038521;SLC44A1;DGKZ;PIK3CD
5	map04975	Fat digestion and absorption	KEGG PATHWAY	5/1553	49/11318	0.821107	1	Organismal Systems	Digestive system	gene11205|gene4974|gene19445|gene12296|gene11513	LOC106039769;PPAP2B;NPC1L1;LOC106041043;LOC106040243
6	map05230	Central carbon metabolism in cancer	KEGG PATHWAY	6/1553	58/11318	0.825628	1	Human Diseases	Cancer: overview	gene4849|gene15282|gene12357|gene421|gene15359|gene9948	PDGFRB;PIK3CD;FLT3;RET;FGFR1;MYC
1	map00920	Sulfur metabolism	KEGG PATHWAY	1/1553	12/11318	0.830008	1	Metabolism	Energy metabolism	gene19772	LOC10603419772
9	map04912	GnRH signaling pathway	KEGG PATHWAY	9/1553	84/11318	0.831964	1	Organismal Systems	Endocrine system	gene1361|gene20029|gene10183|gene14183|gene13840|gene10970|gene16801|gene16949|gene1364	LOC106043002;PTK2B;LOC106038708;MMP2;HBEGF;ADCY7;PRKCB;CACNA1S;LOC106040722
6	map05213	Endometrial cancer	KEGG PATHWAY	6/1553	59/11318	0.837888	1	Human Diseases	Cancer: specific types	gene4772|gene10159|gene15282|gene4032|gene9948|gene17323	HPSE272;LEF1;PIK3CD;TCF7L2;MYC;LOC106046592
6	map05031	Amphetamine addiction	KEGG PATHWAY	6/1553	59/11318	0.837888	1	Human Diseases	Substance dependence	gene2464|gene10183|gene10304|gene18781|gene16801|gene8728	CREB5;LOC106038708;FOS;GRIN3B;PRKCB;GRIN1
8	map04970	Salivary secretion	KEGG PATHWAY	8/1553	77/11318	0.846798	1	Organismal Systems	Digestive system	gene11623|gene16801|gene10183|gene1901|gene10970|gene4367|gene19871|gene15683	LOC106040258;PRKCB;LOC106038708;CHRM3;ADCY7;GUCY1A3;LOC106049351;LOC106044772
5	map04214	Apoptosis - fly	KEGG PATHWAY	5/1553	51/11318	0.847178	1	Cellular Processes	Cell growth and death	gene19819|gene7046|gene15756|gene19925|gene11741	SAV1;STK3;LOC1060458406;TRAF4;LMNB1
6	map04927	Cortisol synthesis and secretion	KEGG PATHWAY	6/1553	60/11318	0.849442	1	Organismal Systems	Endocrine system	gene16949|gene2464|gene10970|gene4257|gene7870|gene4109	CACNA1S;CREB5;ADCY7;CACNA1H;AGTR1;NCEH1
7	map05214	Glioma	KEGG PATHWAY	7/1553	69/11318	0.852754	1	Human Diseases	Cancer: specific types	gene7519|gene4849|gene10183|gene15282|gene16801|gene16021|gene18392	IGF1;PDGFRB;LOC106038708;PIK3CD;PRKCB;LOC106045119;PSD92
5	map05014	Amyotrophic lateral sclerosis (ALS)	KEGG PATHWAY	5/1553	52/11318	0.858986	1	Human Diseases	Neurodegenerative disease	gene6988|gene11543|gene1504|gene8728|gene4862	CASP3;TNFRSF1B;CAT;GRIN1;GPX3
4	map05030	Cocaine addiction	KEGG PATHWAY	4/1553	43/11318	0.859683	1	Human Diseases	Substance dependence	gene6456|gene18781|gene2464|gene8728	RGS9;GRIN3B;CREB5;GRIN1
4	map00513	Various types of N-glycan biosynthesis	KEGG PATHWAY	4/1553	43/11318	0.859683	1	Metabolism	Glycan biosynthesis and metabolism	gene7446|gene17713|gene16667|gene863	MGAT4A;B4GALNT4;LOC106045877;B4GALT3
2	map04614	Renin-angiotensin system	KEGG PATHWAY	2/1553	24/11318	0.860827	1	Organismal Systems	Endocrine system	gene18649|gene7870	PRCP;AGTR1
6	map04370	VEGF signaling pathway	KEGG PATHWAY	6/1553	62/11318	0.870531	1	Environmental Information Processing	Signal transduction	gene1361|gene7610|gene1364|gene15282|gene3569|gene16801	LOC106043002;BLNK10;LOC106040722;PIK3CD;PXN;PRKCB
1	map00604	Glycosphingolipid biosynthesis - ganglio series	KEGG PATHWAY	1/1553	14/11318	0.873503	1	Metabolism	Glycan biosynthesis and metabolism	gene16269	TNFRSF13C9
14	map04611	Platelet activation	KEGG PATHWAY	14/1553	131/11318	0.875959	1	Organismal Systems	Immune system	gene1361|gene6211|gene10479|gene1364|gene1164|gene15282|gene7346|gene5700|gene10970|gene9293|gene3225|gene4367|gene16004|gene10996	LOC106043002;LCP2;LYN;LOC106040722;LOC106041081;PIK3CD;ITGA2;TLN2;ADCY7;GPR1613;TBXAS1;GUCY1A3;SYK;MYLK3
9	map04211	Longevity regulating pathway	KEGG PATHWAY	9/1553	89/11318	0.877808	1	Organismal Systems	Aging	gene7519|gene15854|gene15282|gene2464|gene10060|gene10970|gene15402|gene1504|gene6036	IGF1;INSR;PIK3CD;CREB5;IRS4;ADCY7;IRS2;CAT;SESN3
4	map03420	Nucleotide excision repair	KEGG PATHWAY	4/1553	45/11318	0.882675	1	Genetic Information Processing	Replication and repair	gene11583|gene18126|gene138|gene15967	XPA;POLE;ERCC6;XPC
3	map00350	Tyrosine metabolism	KEGG PATHWAY	3/1553	36/11318	0.888761	1	Metabolism	Amino acid metabolism	gene20701|gene4280|gene20702	LOC106029566;FAHD1;LOC106029567
6	map04976	Bile secretion	KEGG PATHWAY	6/1553	64/11318	0.889096	1	Organismal Systems	Digestive system	gene13059|gene10970|gene5639|gene4109|gene10777|gene3683	ABCG2;ADCY7;AQP9;NCEH1;SCTR;EPHX1
9	map04540	Gap junction	KEGG PATHWAY	9/1553	91/11318	0.89303	1	Cellular Processes	Cellular community - eukaryotes	gene349|gene4849|gene14118|gene10970|gene8702|gene6002|gene16684|gene16801|gene4367	CDK1;PDGFRB;LPAR1;ADCY7;TUBB4B;EVC2;LOC106045884;PRKCB;GUCY1A3
18	map04022	cGMP-PKG signaling pathway	KEGG PATHWAY	18/1553	167/11318	0.893124	1	Environmental Information Processing	Signal transduction	gene15854|gene8074|gene12192|gene10183|gene4127|gene2464|gene10996|gene10970|gene8156|gene15402|gene4367|gene7870|gene18170|gene9821|gene6021|gene10060|gene12521|gene16949	INSR;NPR2;PDE3B;LOC106038708;LOC106032022;CREB5;MYLK3;ADCY7;MEF2A;IRS2;GUCY1A3;AGTR1;LOC106047519;NFATC1;TRPC6;IRS4;LOC106041380;CACNA1S
12	map04931	Insulin resistance	KEGG PATHWAY	12/1553	117/11318	0.89451	1	Human Diseases	Endocrine and metabolic disease	gene15282|gene15854|gene15263|gene10253|gene18515|gene2464|gene10060|gene10220|gene15402|gene16801|gene20117|gene5867	PIK3CD;INSR;LOC106044308;NFKBIA;RPS6KA1;CREB5;IRS4;PRKCQ;IRS2;PRKCB;LOC106049619;PTPRF
3	map00760	Nicotinate and nicotinamide metabolism	KEGG PATHWAY	3/1553	37/11318	0.899526	1	Metabolism	Metabolism of cofactors and vitamins	gene15914|gene14753|gene13726	NMRK2;NUDT12;LOC106042626
2	map04744	Phototransduction	KEGG PATHWAY	2/1553	27/11318	0.901837	1	Organismal Systems	Sensory system	gene6456|gene10183	RGS9;LOC106038708
1	map00061	Fatty acid biosynthesis	KEGG PATHWAY	1/1553	16/11318	0.905874	1	Metabolism	Lipid metabolism	gene4029	ACSL5
1	map00120	Primary bile acid biosynthesis	KEGG PATHWAY	1/1553	16/11318	0.905874	1	Metabolism	Lipid metabolism	gene10519	LOC106039057
35	map05010	Alzheimer disease	KEGG PATHWAY	35/1553	308/11318	0.906367	1	Human Diseases	Neurodegenerative disease	gene15854|gene16220|gene19671|gene3401|gene1901|gene10060|gene4738|gene15402|gene16684|gene20089|gene13414|gene16171|gene13515|gene6988|gene8744|gene18485|gene8702|gene10796|gene3696|gene8728|gene8965|gene19549|gene15282|gene12509|gene11855|gene16395|gene13288|gene10183|gene208|gene16475|gene2357|gene11073|gene20855|gene16949|gene7827	INSR;DKK2;WNT4;FZD10;CHRM3;IRS4;HPSE238;IRS2;LOC106045884;DDIT3;RTN4;FZD8;WNT11;CASP3;TRAF2;LOC106047829;TUBB4B;WNT10A;CAPN2;GRIN1;NOX1;LRP1;PIK3CD;WNT2B;WNT5A;LOC106045569;LOC106042157;LOC106038708;LOC106030078;NDUFA7;FZD7;FZD1;LOC10603007855;CACNA1S;BACE2
2	map04745	Phototransduction - fly	KEGG PATHWAY	2/1553	28/11318	0.912787	1	Organismal Systems	Sensory system	gene20461|gene10183	ADRBK1;LOC106038708
2	map00100	Steroid biosynthesis	KEGG PATHWAY	2/1553	28/11318	0.912787	1	Metabolism	Lipid metabolism	gene218|gene3687	LOC106030157;LBR
2	map00030	Pentose phosphate pathway	KEGG PATHWAY	2/1553	28/11318	0.912787	1	Metabolism	Carbohydrate metabolism	gene3094|gene16232	DERA;LOC106045365
10	map04726	Serotonergic synapse	KEGG PATHWAY	10/1553	103/11318	0.914136	1	Organismal Systems	Nervous system	gene6988|gene1361|gene1364|gene197|gene5926|gene14137|gene16801|gene6247|gene16949|gene15470	CASP3;LOC106043002;LOC106040722;LOC106034197;GNG5;GNAO1;PRKCB;GABRB2;CACNA1S;KCND2
10	map04725	Cholinergic synapse	KEGG PATHWAY	10/1553	103/11318	0.914136	1	Organismal Systems	Nervous system	gene2598|gene10304|gene2464|gene1901|gene5926|gene14137|gene10970|gene16801|gene16949|gene15282	KCNQ5;FOS;CREB5;CHRM3;GNG5;GNAO1;ADCY7;PRKCB;CACNA1S;PIK3CD
7	map04013	MAPK signaling pathway - fly	KEGG PATHWAY	7/1553	77/11318	0.918423	1	Environmental Information Processing	Signal transduction	gene8156|gene15263|gene17547|gene8304|gene19016|gene11894|gene14075	MEF2A;LOC106044308;TBX2;XPO1;CHRM36;ETS1;LOC106042970
13	map04919	Thyroid hormone signaling pathway	KEGG PATHWAY	13/1553	131/11318	0.924223	1	Organismal Systems	Endocrine system	gene4994|gene12773|gene19671|gene10808|gene15282|gene2495|gene17626|gene9948|gene14442|gene18485|gene16801|gene16365|gene11333	DIO1;NOTCH2;WNT4;PLCD4;PIK3CD;KAT2B;PLCD3;MYC;RCAN1;LOC106047829;PRKCB;MED13L;STAT1
5	map04918	Thyroid hormone synthesis	KEGG PATHWAY	5/1553	60/11318	0.928516	1	Organismal Systems	Endocrine system	gene15495|gene10970|gene2464|gene16801|gene4862	TSHR;ADCY7;CREB5;PRKCB;GPX3
1	map00360	Phenylalanine metabolism	KEGG PATHWAY	1/1553	18/11318	0.929966	1	Metabolism	Amino acid metabolism	gene7523	PAH
6	map04971	Gastric acid secretion	KEGG PATHWAY	6/1553	70/11318	0.931773	1	Organismal Systems	Digestive system	gene10183|gene1901|gene10970|gene16801|gene10996|gene6432	LOC106038708;CHRM3;ADCY7;PRKCB;MYLK3;SSTR2
3	map03440	Homologous recombination	KEGG PATHWAY	3/1553	41/11318	0.933784	1	Genetic Information Processing	Replication and repair	gene9871|gene6352|gene17737	TOPBP1;BARD1;RAD51
2	map04130	SNARE interactions in vesicular transport	KEGG PATHWAY	2/1553	31/11318	0.939143	1	Genetic Information Processing	Folding, sorting and degradation	gene10962|gene11623	STX11;LOC106040258
11	map04071	Sphingolipid signaling pathway	KEGG PATHWAY	11/1553	117/11318	0.939478	1	Environmental Information Processing	Signal transduction	gene7610|gene8744|gene10163|gene15282|gene18974|gene16929|gene20058|gene7964|gene16801|gene8261|gene12521	BLNK10;TRAF2;SGMS2;PIK3CD;ACER1;SMPD2;MRPL148;SGPP2;PRKCB;SPTLC3;LOC106041380
1	map04950	Maturity onset diabetes of the young	KEGG PATHWAY	1/1553	19/11318	0.939591	1	Human Diseases	Endocrine and metabolic disease	gene13125	NR5A2
1	map00220	Arginine biosynthesis	KEGG PATHWAY	1/1553	19/11318	0.939591	1	Metabolism	Amino acid metabolism	gene3800	ARG2
15	map04921	Oxytocin signaling pathway	KEGG PATHWAY	15/1553	152/11318	0.939685	1	Organismal Systems	Endocrine system	gene1361|gene8074|gene16949|gene7322|gene10183|gene10304|gene14137|gene10970|gene14442|gene4367|gene16801|gene9821|gene1364|gene10996|gene8354	LOC106043002;NPR2;CACNA1S;CACNA2D1;LOC106038708;FOS;GNAO1;ADCY7;RCAN1;GUCY1A3;PRKCB;NFATC1;LOC106040722;MYLK3;OXTR
13	map04723	Retrograde endocannabinoid signaling	KEGG PATHWAY	13/1553	136/11318	0.944707	1	Organismal Systems	Nervous system	gene9602|gene16801|gene9571|gene14137|gene16475|gene10970|gene20855|gene5067|gene5926|gene6247|gene2993|gene16949|gene6243	MGLL;PRKCB;ABHD6;GNAO1;NDUFA7;ADCY7;LOC10603007855;LOC106032948;GNG5;GABRB2;GABRA2;CACNA1S;GABRA1
7	map04925	Aldosterone synthesis and secretion	KEGG PATHWAY	7/1553	82/11318	0.945078	1	Organismal Systems	Endocrine system	gene10183|gene2464|gene10970|gene4257|gene16801|gene7870|gene16949	LOC106038708;CREB5;ADCY7;CACNA1H;PRKCB;AGTR1;CACNA1S
2	map04710	Circadian rhythm	KEGG PATHWAY	2/1553	32/11318	0.946103	1	Organismal Systems	Environmental adaptation	gene19598|gene8380	NPAS2;BHLHE40
10	map04724	Glutamatergic synapse	KEGG PATHWAY	10/1553	110/11318	0.94712	1	Organismal Systems	Nervous system	gene1361|gene20461|gene18754|gene18781|gene5926|gene14137|gene10970|gene16801|gene8728|gene1364	LOC106043002;ADRBK1;LOC106048154;GRIN3B;GNG5;GNAO1;ADCY7;PRKCB;GRIN1;LOC106040722
1	map00532	Glycosaminoglycan biosynthesis - chondroitin sulfate / dermatan sulfate	KEGG PATHWAY	1/1553	20/11318	0.947894	1	Metabolism	Glycan biosynthesis and metabolism	gene5436	XYLT1
13	map00230	Purine metabolism	KEGG PATHWAY	13/1553	137/11318	0.948172	1	Metabolism	Nucleotide metabolism	gene16349|gene8074|gene8759|gene9706|gene2935|gene10970|gene3044|gene13726|gene4367|gene14460|gene12192|gene14963|gene4833	PDE1C;NPR2;ENTPD2;ENPP4;RRM2;ADCY7;PPAT;LOC106042626;GUCY1A3;LOC106043431;PDE3B;DCK;LOC106032673
2	map00051	Fructose and mannose metabolism	KEGG PATHWAY	2/1553	34/11318	0.957814	1	Metabolism	Carbohydrate metabolism	gene3103|gene16232	LOC106030914;LOC106045365
2	map04215	Apoptosis - multiple species	KEGG PATHWAY	2/1553	34/11318	0.957814	1	Cellular Processes	Cell growth and death	gene6988|gene8056	CASP3;PMAIP1
3	map04973	Carbohydrate digestion and absorption	KEGG PATHWAY	3/1553	46/11318	0.961439	1	Organismal Systems	Digestive system	gene15282|gene15547|gene16801	PIK3CD;LOC106044607;PRKCB
3	map04961	Endocrine and other factor-regulated calcium reabsorption	KEGG PATHWAY	3/1553	47/11318	0.96547	1	Organismal Systems	Excretory system	gene17969|gene16801|gene12795	DNM1;PRKCB;DNM3
3	map05110	Vibrio cholerae infection	KEGG PATHWAY	3/1553	48/11318	0.969101	1	Human Diseases	Infectious disease: bacterial	gene14247|gene2944|gene3373	ATP6V1B1;ATP6V1C2;TCTN2
3	map00510	N-Glycan biosynthesis	KEGG PATHWAY	3/1553	48/11318	0.969101	1	Metabolism	Glycan biosynthesis and metabolism	gene7446|gene16667|gene863	MGAT4A;LOC106045877;B4GALT3
11	map04152	AMPK signaling pathway	KEGG PATHWAY	11/1553	127/11318	0.970179	1	Environmental Information Processing	Signal transduction	gene7519|gene11395|gene16232|gene6843|gene15854|gene13574|gene15282|gene2464|gene10060|gene15402|gene9889	IGF1;LOC106040019;LOC106045365;CAB39L;INSR;CCNA2;PIK3CD;CREB5;IRS4;IRS2;LOC106038418
2	map00630	Glyoxylate and dicarboxylate metabolism	KEGG PATHWAY	2/1553	38/11318	0.974344	1	Metabolism	Carbohydrate metabolism	gene4250|gene1504	SHMT1;CAT
1	map03060	Protein export	KEGG PATHWAY	1/1553	25/11318	0.975127	1	Genetic Information Processing	Folding, sorting and degradation	gene4090	LOC106031985
4	map04720	Long-term potentiation	KEGG PATHWAY	4/1553	61/11318	0.975452	1	Organismal Systems	Nervous system	gene18515|gene16801|gene8728|gene10183	RPS6KA1;PRKCB;GRIN1;LOC106038708
12	map04910	Insulin signaling pathway	KEGG PATHWAY	12/1553	139/11318	0.975713	1	Organismal Systems	Endocrine system	gene15854|gene14041|gene16232|gene10183|gene13149|gene15282|gene14042|gene10060|gene15402|gene12442|gene12192|gene5867	INSR;CHST11;LOC106045365;LOC106038708;PRKAR2B;PIK3CD;CHST12;IRS4;IRS2;SOCS1;PDE3B;PTPRF
9	map04722	Neurotrophin signaling pathway	KEGG PATHWAY	9/1553	114/11318	0.980994	1	Organismal Systems	Nervous system	gene15282|gene15263|gene10253|gene2012|gene18515|gene10183|gene16484|gene12791|gene14154	PIK3CD;LOC106044308;NFKBIA;NFKBIE;RPS6KA1;LOC106038708;MATK;FASLG;LOC106043112
1	map00563	Glycosylphosphatidylinositol (GPI)-anchor biosynthesis	KEGG PATHWAY	1/1553	27/11318	0.981498	1	Metabolism	Glycan biosynthesis and metabolism	gene12794	PIGC
5	map05211	Renal cell carcinoma	KEGG PATHWAY	5/1553	76/11318	0.984272	1	Human Diseases	Cancer: specific types	gene17756|gene11894|gene15282|gene15263|gene7321	PAK6;ETS1;PIK3CD;LOC106044308;HGF
10	map04371	Apelin signaling pathway	KEGG PATHWAY	10/1553	130/11318	0.988716	1	Environmental Information Processing	Signal transduction	gene10183|gene8086|gene5926|gene10970|gene8156|gene7870|gene6291|gene12192|gene10996|gene17323	LOC106038708;PLIN1;GNG5;ADCY7;MEF2A;AGTR1;HDAC4;PDE3B;MYLK3;LOC106046592
4	map04260	Cardiac muscle contraction	KEGG PATHWAY	4/1553	69/11318	0.989513	1	Organismal Systems	Circulatory system	gene16949|gene3842|gene7322|gene4738	CACNA1S;ACTC1;CACNA2D1;HPSE238
19	map04024	cAMP signaling pathway	KEGG PATHWAY	19/1553	215/11318	0.989621	1	Environmental Information Processing	Signal transduction	gene15282|gene2464|gene12131|gene10253|gene10183|gene10304|gene18781|gene19959|gene16949|gene10970|gene17316|gene7610|gene8728|gene15495|gene9821|gene12192|gene14211|gene6432|gene8354	PIK3CD;CREB5;EDN3;NFKBIA;LOC106038708;FOS;GRIN3B;LOC106049445;CACNA1S;ADCY7;EDN2;BLNK10;GRIN1;TSHR;NFATC1;PDE3B;LHCGR;SSTR2;OXTR
1	map00020	Citrate cycle (TCA cycle)	KEGG PATHWAY	1/1553	31/11318	0.989764	1	Metabolism	Carbohydrate metabolism	gene390	OGDHL
7	map04972	Pancreatic secretion	KEGG PATHWAY	7/1553	102/11318	0.990443	1	Organismal Systems	Digestive system	gene19934|gene1901|gene10970|gene5948|gene16801|gene11513|gene10777	LOC106049424;CHRM3;ADCY7;LOC106034001;PRKCB;LOC106040243;SCTR
1	map00052	Galactose metabolism	KEGG PATHWAY	1/1553	33/11318	0.992387	1	Metabolism	Carbohydrate metabolism	gene3103	LOC106030914
3	map04137	Mitophagy - animal	KEGG PATHWAY	3/1553	62/11318	0.993869	1	Cellular Processes	Transport and catabolism	gene4840|gene4580|gene18392	SQSTM1;CITED2;PSD92
10	map04932	Non-alcoholic fatty liver disease (NAFLD)	KEGG PATHWAY	10/1553	139/11318	0.994727	1	Human Diseases	Endocrine and metabolic disease	gene6988|gene15854|gene8744|gene12791|gene16475|gene15402|gene4738|gene20089|gene10060|gene15282	CASP3;INSR;TRAF2;FASLG;NDUFA7;IRS2;HPSE238;DDIT3;IRS4;PIK3CD
1	map03050	Proteasome	KEGG PATHWAY	1/1553	37/11318	0.99579	1	Genetic Information Processing	Folding, sorting and degradation	gene5721	HYKK
13	map04141	Protein processing in endoplasmic reticulum	KEGG PATHWAY	13/1553	172/11318	0.996048	1	Genetic Information Processing	Folding, sorting and degradation	gene11588|gene8744|gene1190|gene12381|gene4090|gene596|gene19854|gene20089|gene3696|gene17700|gene19506|gene11109|gene8169	DNAJA1;TRAF2;LOC106041315;HSPH1;LOC106031985;WFS1;UGGT2;DDIT3;CAPN2;HSP90AA1;LOC106048968;HSPA8;VIMP
3	map03018	RNA degradation	KEGG PATHWAY	3/1553	67/11318	0.996636	1	Genetic Information Processing	Folding, sorting and degradation	gene4828|gene11359|gene3127	CNOT6;HSPD1;LOC106030932
1	map00500	Starch and sucrose metabolism	KEGG PATHWAY	1/1553	41/11318	0.997672	1	Metabolism	Carbohydrate metabolism	gene1108	GBE1
1	map00640	Propanoate metabolism	KEGG PATHWAY	1/1553	41/11318	0.997672	1	Metabolism	Carbohydrate metabolism	gene10595	EHHADH
14	map04530	Tight junction	KEGG PATHWAY	14/1553	191/11318	0.99814	1	Cellular Processes	Cellular community - eukaryotes	gene19675|gene15946|gene6562|gene17870|gene18748|gene5533|gene14438|gene20593|gene17879|gene16388|gene16684|gene17645|gene6138|gene16183	CLDN19;EPB41L4B;LOC106034617;LOC106047195;LOC106048163;MICALL2;RUNX1;LOC106029451;LOC106047203;LOC106045529;LOC106045884;ACTR3B;CLDN20;PARD3
6	map00190	Oxidative phosphorylation	KEGG PATHWAY	6/1553	108/11318	0.998185	1	Metabolism	Energy metabolism	gene2944|gene14247|gene16475|gene20855|gene4738|gene3373	ATP6V1C2;ATP6V1B1;NDUFA7;LOC10603007855;HPSE238;TCTN2
5	map04922	Glucagon signaling pathway	KEGG PATHWAY	5/1553	97/11318	0.998274	1	Organismal Systems	Endocrine system	gene12192|gene2464|gene7793|gene16232|gene10183	PDE3B;CREB5;SIK1;LOC106045365;LOC106038708
6	map03040	Spliceosome	KEGG PATHWAY	6/1553	109/11318	0.998366	1	Genetic Information Processing	Transcription	gene17032|gene9861|gene19019|gene20224|gene17530|gene11109	SNRPG;SNRPD1;CHRM39;PPIH;CCDC12;HSPA8
8	map04261	Adrenergic signaling in cardiomyocytes	KEGG PATHWAY	8/1553	132/11318	0.998515	1	Organismal Systems	Circulatory system	gene7322|gene10183|gene2464|gene10970|gene7870|gene16176|gene16949|gene3842	CACNA2D1;LOC106038708;CREB5;ADCY7;AGTR1;CREM;CACNA1S;ACTC1
1	map00270	Cysteine and methionine metabolism	KEGG PATHWAY	1/1553	45/11318	0.998713	1	Metabolism	Amino acid metabolism	gene19449	MAT2A
1	map00520	Amino sugar and nucleotide sugar metabolism	KEGG PATHWAY	1/1553	45/11318	0.998713	1	Metabolism	Carbohydrate metabolism	gene9752	LOC106038270
1	map00970	Aminoacyl-tRNA biosynthesis	KEGG PATHWAY	1/1553	46/11318	0.99889	1	Genetic Information Processing	Translation	gene2015	AARS2
6	map04728	Dopaminergic synapse	KEGG PATHWAY	6/1553	113/11318	0.998931	1	Organismal Systems	Nervous system	gene10183|gene10304|gene2464|gene5926|gene14137|gene16801	LOC106038708;FOS;CREB5;GNG5;GNAO1;PRKCB
1	map03022	Basal transcription factors	KEGG PATHWAY	1/1553	47/11318	0.999043	1	Genetic Information Processing	Transcription	gene5678	GTF2A2
7	map04140	Autophagy - animal	KEGG PATHWAY	7/1553	126/11318	0.999102	1	Cellular Processes	Transport and catabolism	gene15282|gene4840|gene10220|gene15892|gene15402|gene12086|gene10060	PIK3CD;SQSTM1;PRKCQ;LOC106044971;IRS2;LOC106040774;IRS4
5	map04066	HIF-1 signaling pathway	KEGG PATHWAY	5/1553	104/11318	0.999207	1	Environmental Information Processing	Signal transduction	gene7519|gene15282|gene13288|gene16801|gene15854	IGF1;PIK3CD;LOC106042157;PRKCB;INSR
8	map04120	Ubiquitin mediated proteolysis	KEGG PATHWAY	8/1553	140/11318	0.99933	1	Genetic Information Processing	Folding, sorting and degradation	gene15178|gene16847|gene19619|gene8025|gene4338|gene10599|gene12442|gene5872	PML;LOC106046070;CDC34;LOC106036387;LOC106032252;ANAPC13;SOCS1;CDC20
13	map04714	Thermogenesis	KEGG PATHWAY	13/1553	201/11318	0.999675	1	Organismal Systems	Environmental adaptation	gene9602|gene2716|gene8086|gene4029|gene18515|gene2464|gene16475|gene10970|gene20855|gene4738|gene3893|gene712|gene15359	MGLL;NDUFAF6;PLIN1;ACSL5;RPS6KA1;CREB5;NDUFA7;ADCY7;LOC10603007855;HPSE238;PNPLA2;SLC25A29;FGFR1
4	map03010	Ribosome	KEGG PATHWAY	4/1553	110/11318	0.999913	1	Genetic Information Processing	Translation	gene14449|gene16460|gene2005|gene3660	MRPS6;RPL36;MRPL14;MRPS10
16	map05016	Huntington disease	KEGG PATHWAY	16/1553	255/11318	0.999959	1	Human Diseases	Neurodegenerative disease	gene6988|gene16085|gene17469|gene4861|gene4862|gene8744|gene5467|gene2464|gene16475|gene9530|gene8702|gene20855|gene4738|gene17689|gene8728|gene16684	CASP3;DNAI1;DNAH17;DCTN4;GPX3;TRAF2;DNAH3;CREB5;NDUFA7;DNALI1;TUBB4B;LOC10603007855;HPSE238;RCOR1;GRIN1;LOC106045884
4	map05012	Parkinson disease	KEGG PATHWAY	4/1553	122/11318	0.99998	1	Human Diseases	Neurodegenerative disease	gene6988|gene20855|gene4738|gene16475	CASP3;LOC10603007855;HPSE238;NDUFA7
5	map04740	Olfactory transduction	KEGG PATHWAY	5/1553	156/11318	0.999998	1	Organismal Systems	Sensory system	gene20461|gene16349|gene18749|gene13478|gene10183	ADRBK1;PDE1C;LOC106048164;LOC106042364;LOC106038708
3	map03008	Ribosome biogenesis in eukaryotes	KEGG PATHWAY	3/1553	137/11318	1	1	Genetic Information Processing	Translation	gene8304|gene12315|gene7041	XPO1;SBDS;POP1

## Sheet: 70vs300-KEGG
Num	Pathway id	Description		Database	Ratio_in_study	Ratio_in_pop	Pvalue	Padjust	First Category	Second Category	Gene_ids	Gene_names
26	map05340	Primary immunodeficiency		KEGG PATHWAY	26/2172	39/11318	1.2e-10	3.97e-08	Human Diseases	Immune disease	gene12437|gene497|gene496|gene17853|gene18816|gene20335|gene1484|gene1485|gene76|gene1626|gene18476|gene3268|gene20397|gene11186|gene11185|gene20398|gene20399|gene9042|gene18968|gene18685|gene9468|gene9293|gene13131|gene2315|gene20641|gene20642	CIITA;CD8A;LOC106033965;CD40;LOC106048210;LOC106049856;RAG2;RAG1;BLNK;TNFRSF13C;NFKB276;UNG;LOC106049912;CD3E;CD3D;LOC106049913;LOC106049914;IL2RG;ZAP70;AICDA;LCK;GPR1613;PTPRC;LOC106030066;LOC106029502;TAP2
72	map04060	Cytokine-cytokine receptor interaction		KEGG PATHWAY	72/2172	205/11318	4.54e-08	5.02e-06	Environmental Information Processing	Signaling molecules and interaction	gene9866|gene11193|gene12788|gene20740|gene19572|gene15810|gene2407|gene7487|gene8032|gene14611|gene14612|gene11544|gene12856|gene11687|gene8014|gene11543|gene15257|gene8390|gene20213|gene132|gene9028|gene11169|gene12997|gene1270|gene12998|gene10215|gene17853|gene16832|gene1626|gene16831|gene9415|gene9414|gene5185|gene9042|gene12638|gene10735|gene8681|gene9867|gene12290|gene8682|gene2120|gene2020…	CXCR6;IL10RA;LOC106041570;CLCF1;LIF;LOC10604815310;IL6;LOC106035752;PRLR;IL23R;IL12RB2;TNFRSF8;LOC106041678;TNFRSF19;LIFR;TNFRSF1B;TNFRSF18;IL5RA;IL1B;CXCL12;IL13RA2;IL18;CX3CR1;BMP7;CCR4;IL2RA;CD40;LOC106046046;TNFRSF13C;IL21R;IL22RA1;IFNLR1;LOC106033294;IL2RG;LOC106041491;CXCR4;TNFSF8;XCR1;LOC106041041;TNFSF15;LOC106029911;TNFRSF10B;ACKR4;LOC106038356;LOC106045913;BMP5;LOC106041040;LOC106038263…
55	map04514	Cell adhesion molecules (CAMs)		KEGG PATHWAY	55/2172	141/11318	3.15e-08	5.23e-06	Environmental Information Processing	Signaling molecules and interaction	gene19675|gene19394|gene3276|gene15079|gene12755|gene17853|gene2296|gene6749|gene7779|gene497|gene496|gene12308|gene12205|gene20337|gene1063|gene14249|gene12586|gene12585|gene8620|gene6138|gene18476|gene5867|gene20127|gene20407|gene18636|gene16782|gene16048|gene20630|gene19621|gene19851|gene20840|gene15745|gene17323|gene17136|gene1071|gene11872|gene10829|gene12814|gene20307|gene20306|gene17135|ge…	CLDN19;LRRC4;SELPLG;NTNG2;LOC106041540;CD40;ITGA4;PTPRM;ICOSLG;CD8A;LOC106033965;LOC106041034;SDC4;LOC106049848;CD2;LOC106043214;NFASC;CNTN2;NCAM2;CLDN20;NFKB276;PTPRF;LRRC4B;LOC106049920;CNTNAP1;LOC106045971;SDC3;LOC106029492;MADCAM1;CLDN10;LOC10603007840;PDCD1;LOC106046592;LOC106046390;CD80;ESAM;VCAM1;LOC106041602;LOC106049814;LOC106049813;PDCD1LG2;PIK3AP171;PIK3AP170;PVRL1;CD34;PTPRC;LOC106049…
46	map04064	NF-kappa B signaling pathway		KEGG PATHWAY	46/2172	114/11318	1.28e-07	1.06e-05	Environmental Information Processing	Signal transduction	gene19270|gene11983|gene15810|gene16782|gene13304|gene11888|gene14384|gene3669|gene17853|gene16487|gene2836|gene20213|gene7615|gene10253|gene8744|gene4181|gene20146|gene76|gene132|gene1626|gene465|gene16188|gene10829|gene17686|gene20397|gene12290|gene11576|gene19163|gene4565|gene20398|gene20399|gene16801|gene16004|gene16394|gene18968|gene184|gene208|gene9468|gene10080|gene12857|gene19271|gene1022…	PIK3AP170;TRAF1;LOC10604815310;LOC106045971;LOC106042201;TIRAP;BCL2A1;TRAF5;CD40;LOC106045683;LY96;IL1B;BLNK15;NFKBIA;TRAF2;CARD11;LOC106049641;BLNK;CXCL12;TNFRSF13C;PLAU;NFKB1;VCAM1;TRAF3;LOC106049912;LOC106041041;DDX58;LOC106048600;TNFAIP3;LOC106049913;LOC106049914;PRKCB;SYK;EDA2R;ZAP70;NFKB2;LOC106030078;LCK;XIAP;LOC106041672;PIK3AP171;PRKCQ;GPR1613;LOC106033293;PTGS2;LOC106048595
24	map04612	Antigen processing and presentation		KEGG PATHWAY	24/2172	52/11318	8.71e-06	0.000481677	Organismal Systems	Immune system	gene16782|gene12437|gene497|gene496|gene4734|gene20335|gene20337|gene4855|gene17700|gene18476|gene11109|gene16893|gene780|gene18088|gene20840|gene19271|gene19270|gene15892|gene20407|gene20405|gene20644|gene8833|gene20641|gene20642	LOC106045971;CIITA;CD8A;LOC106033965;HPSE234;LOC106049856;LOC106049848;CD74;HSP90AA1;NFKB276;HSPA8;NFYA;LGMN;B2M;LOC10603007840;PIK3AP171;PIK3AP170;LOC106044971;LOC106049920;LOC106049922;LOC106029505;HSPA2;LOC106029502;TAP2
35	map04640	Hematopoietic cell lineage		KEGG PATHWAY	35/2172	89/11318	7.9e-06	0.000524577	Organismal Systems	Immune system	gene2407|gene10215|gene2296|gene497|gene496|gene7487|gene8390|gene20213|gene1063|gene18876|gene7346|gene20146|gene16832|gene11186|gene18476|gene20397|gene20630|gene11185|gene16336|gene10714|gene20398|gene20399|gene20840|gene16763|gene12858|gene17801|gene1497|gene1496|gene7318|gene12857|gene9522|gene12538|gene19161|gene20407|gene20405	IL6;IL2RA;ITGA4;CD8A;LOC106033965;LOC106035752;IL5RA;IL1B;CD2;CD5;ITGA2;LOC106049641;LOC106046046;CD3E;NFKB276;LOC106049912;LOC106029492;CD3D;CD9;GP5;LOC106049913;LOC106049914;LOC10603007840;ITGB3;IL1R2;LOC106047112;LOC106044451;CD44;CD36;LOC106041672;CSF3R;CD34;IL11RA;LOC106049920;LOC106049922
30	map05150	Staphylococcus aureus infection		KEGG PATHWAY	30/2172	76/11318	3.17e-05	0.00150254	Human Diseases	Infectious disease: bacterial	gene3276|gene16782|gene11570|gene11984|gene20338|gene18597|gene18595|gene18594|gene18593|gene20066|gene20067|gene20068|gene20069|gene18599|gene12732|gene20397|gene12755|gene18591|gene19609|gene20398|gene20399|gene20840|gene18600|gene19271|gene19270|gene20407|gene20405|gene9668|gene18460|gene2370	SELPLG;LOC106045971;STK40;C5;LOC106049849;LOC106048008;LOC106048012;LOC106048010;LOC106047978;LOC106049570;KRT23;KRT20;LOC106049573;LOC106048011;CFH;LOC106049912;LOC106041540;LOC106047977;LOC106049106;LOC106049913;LOC106049914;LOC10603007840;LOC106047979;PIK3AP171;PIK3AP170;LOC106049920;LOC106049922;LOC106038139;NFKB260;ITGB2
62	map05166	Human T-cell leukemia virus 1 infection		KEGG PATHWAY	62/2172	203/11318	6.18e-05	0.00256485	Human Diseases	Infectious disease: viral	gene4693|gene606|gene7841|gene13574|gene16782|gene2720|gene4965|gene2407|gene5700|gene15653|gene2495|gene17853|gene6255|gene5032|gene5078|gene18816|gene9468|gene20337|gene11883|gene10098|gene10253|gene10215|gene19270|gene9948|gene1626|gene12857|gene16188|gene11894|gene9042|gene6012|gene2120|gene13864|gene16645|gene3340|gene16896|gene11186|gene11185|gene18088|gene2105|gene20840|gene7661|gene16021|…	EGR1;MSX1;ETS2;CCNA2;LOC106045971;CCNE2;JUN;IL6;TLN2;SRF;KAT2B;CD40;PTTG1;CDKN2C;PIK3R3;LOC106048210;LCK;LOC106049848;CHEK1;MAD2L1;NFKBIA;IL2RA;PIK3AP170;MYC;TNFRSF13C;LOC106041672;NFKB1;ETS1;IL2RG;EVC22;LOC106029911;MSX2;CCND3;ANAPC5;LOC106046185;CD3E;CD3D;B2M;ADCY5;LOC10603007840;BLNK61;LOC106045119;NRP1;NFKB276;PSD92;IL1R2;PIK3AP171;ADCY7;LOC106030078;FOS;NFKB2;LOC10602987820;XIAP;NFATC2;XPO1;…
22	map04672	Intestinal immune network for IgA production		KEGG PATHWAY	22/2172	54/11318	0.000204348	0.00753818	Organismal Systems	Immune system	gene15810|gene16782|gene2407|gene2296|gene7779|gene17853|gene132|gene1626|gene20397|gene10735|gene19621|gene20398|gene20399|gene20840|gene1071|gene18685|gene19271|gene19270|gene20407|gene20405|gene2313|gene2315	LOC10604815310;LOC106045971;IL6;ITGA4;ICOSLG;CD40;CXCL12;TNFRSF13C;LOC106049912;CXCR4;MADCAM1;LOC106049913;LOC106049914;LOC10603007840;CD80;AICDA;PIK3AP171;PIK3AP170;LOC106049920;LOC106049922;CD28;LOC106030066
36	map04659	Th17 cell differentiation		KEGG PATHWAY	36/2172	107/11318	0.000271272	0.00900622	Organismal Systems	Immune system	gene19270|gene2012|gene16782|gene4965|gene2407|gene14611|gene12857|gene18816|gene10253|gene10215|gene10230|gene16831|gene16188|gene17700|gene9042|gene11185|gene20213|gene1052|gene11186|gene2120|gene14438|gene20840|gene18476|gene12815|gene18968|gene208|gene10304|gene18252|gene1227|gene19271|gene10220|gene20407|gene20405|gene14856|gene9468|gene11333	PIK3AP170;NFKBIE;LOC106045971;JUN;IL6;IL23R;LOC106041672;LOC106048210;NFKBIA;IL2RA;GATA3;IL21R;NFKB1;HSP90AA1;IL2RG;CD3D;IL1B;CD247;CD3E;LOC106029911;RUNX1;LOC10603007840;NFKB276;RXRG;ZAP70;LOC106030078;FOS;IL1RAP;NFATC2;PIK3AP171;PRKCQ;LOC106049920;LOC106049922;RAG16;LCK;STAT1
31	map05323	Rheumatoid arthritis		KEGG PATHWAY	31/2172	90/11318	0.000443849	0.0133962	Human Diseases	Immune disease	gene15810|gene16782|gene4965|gene2407|gene3373|gene20213|gene11169|gene14247|gene8686|gene132|gene5182|gene19789|gene12638|gene12292|gene20397|gene20823|gene20398|gene20399|gene20840|gene1071|gene2944|gene10304|gene19271|gene19270|gene15892|gene5185|gene20407|gene20405|gene2313|gene2314|gene2370	LOC10604815310;LOC106045971;JUN;IL6;TCTN2;IL1B;IL18;ATP6V1B1;ATP6V1G1;CXCL12;LOC106033293;LOC10603419789;LOC106041491;LOC106041040;LOC106049912;LOC10603007823;LOC106049913;LOC106049914;LOC10603007840;CD80;ATP6V1C2;FOS;PIK3AP171;PIK3AP170;LOC106044971;LOC106033294;LOC106049920;LOC106049922;CD28;CTLA4;ITGB2
30	map04658	Th1 and Th2 cell differentiation		KEGG PATHWAY	30/2172	87/11318	0.000533415	0.0147578	Organismal Systems	Immune system	gene19270|gene2012|gene16782|gene4965|gene14612|gene18816|gene10253|gene10215|gene10230|gene16188|gene6031|gene9042|gene700|gene11186|gene11185|gene20840|gene18476|gene1052|gene18968|gene208|gene10304|gene1227|gene19271|gene10220|gene9404|gene20407|gene20405|gene11335|gene9468|gene11333	PIK3AP170;NFKBIE;LOC106045971;JUN;IL12RB2;LOC106048210;NFKBIA;IL2RA;GATA3;NFKB1;MAML2;IL2RG;RBPJ;CD3E;CD3D;LOC10603007840;NFKB276;CD247;ZAP70;LOC106030078;FOS;NFATC2;PIK3AP171;PRKCQ;RUNX3;LOC106049920;LOC106049922;STAT4;LCK;STAT1
128	map05200	Pathways in cancer		KEGG PATHWAY	128/2172	513/11318	0.00059995	0.0153218	Human Diseases	Cancer: overview	gene8973|gene10062|gene2407|gene15544|gene11983|gene5078|gene15178|gene19987|gene10215|gene18661|gene2087|gene13258|gene2668|gene12815|gene2665|gene2666|gene4965|gene2105|gene4080|gene11699|gene7599|gene12556|gene7519|gene4849|gene10183|gene16477|gene20014|gene2746|gene7584|gene8390|gene6455|gene7346|gene4032|gene7870|gene7975|gene17686|gene10159|gene13160|gene13562|gene2120|gene14438|gene978|gen…	FGF13;COL4A6;IL6;LOC106044634;TRAF1;PIK3R3;PML;LPAR2;IL2RA;FZD4;LOC1060300787;CXCL1258;LOC106030437;RXRG;LOC106030435;LOC106030436;JUN;ADCY5;MECOM;FGF9;LOC106035885;RASSF5;IGF1;PDGFRB;LOC106038708;LOC106045698;FGFR4;RUNX1T1;HMOX1;IL5RA;GNA13;ITGA2;TCF7L2;AGTR1;FGF10;TRAF3;LEF1;LAMB1;PLA2G4F2;LOC106029911;RUNX1;CBLB;RET;ADCY7;AGT;LOC106045119;PTGER4;RARB;LAMA2;STK4;FZD3;EDNRA;NFKB2;ETS2;LOC1060298…
27	map05416	Viral myocarditis		KEGG PATHWAY	27/2172	77/11318	0.000739424	0.0175349	Human Diseases	Cardiovascular disease	gene3016|gene20397|gene16782|gene20542|gene4209|gene17853|gene6988|gene8608|gene989|gene20337|gene19308|gene4899|gene20398|gene20399|gene20840|gene7610|gene1071|gene4508|gene11690|gene19180|gene19271|gene19270|gene20407|gene20405|gene20644|gene2313|gene2370	SGCB;LOC106049912;LOC106045971;PRF1;LOC106032083;CD40;CASP3;CXADR;MYH15;LOC106049848;DAG1;SGCD;LOC106049913;LOC106049914;LOC10603007840;BLNK10;CD80;LAMA2;SGCG;EIF4G3;PIK3AP171;PIK3AP170;LOC106049920;LOC106049922;LOC106029505;CD28;ITGB2
33	map04668	TNF signaling pathway		KEGG PATHWAY	33/2172	102/11318	0.00104107	0.0230422	Environmental Information Processing	Signal transduction	gene12292|gene11983|gene17471|gene10829|gene4965|gene2407|gene9326|gene3669|gene11543|gene17850|gene5078|gene6988|gene10253|gene8744|gene19572|gene16188|gene17686|gene20213|gene3434|gene4565|gene7661|gene11989|gene13765|gene12814|gene4749|gene208|gene10304|gene12853|gene4218|gene5182|gene5185|gene5990|gene1416	LOC106041040;TRAF1;SOCS3;VCAM1;JUN;IL6;FIGF;TRAF5;TNFRSF1B;MMP9;PIK3R3;CASP3;NFKBIA;TRAF2;LIF;NFKB1;TRAF3;IL1B;PGAM5;TNFAIP3;BLNK61;DAB2IP;MAP3K8;LOC106041602;IRF1;LOC106030078;FOS;IL18R1;MAP2K3;LOC106033293;LOC106033294;PTGS2;CREB3L1
14	map01040	Biosynthesis of unsaturated fatty acids		KEGG PATHWAY	14/2172	32/11318	0.00126668	0.0262836	Metabolism	Lipid metabolism	gene7393|gene1468|gene18932|gene18879|gene1541|gene19151|gene1542|gene172|gene5871|gene576|gene5749|gene8482|gene1336|gene17906	ELOVL7;HSD17B12;HSD17B4;LOC106048282;LOC106044856;ELOVL4;LOC106044871;SCD;ELOVL1;ACOX3;FADS1;ACAA1;LOC106042682;ACOT7
56	map05169	Epstein-Barr virus infection		KEGG PATHWAY	56/2172	200/11318	0.00146801	0.0270766	Human Diseases	Infectious disease: viral	gene13574|gene16782|gene2720|gene4965|gene2407|gene1969|gene5624|gene2012|gene3669|gene17853|gene3889|gene5078|gene18816|gene20335|gene20337|gene10253|gene8744|gene76|gene9948|gene16645|gene16188|gene4565|gene700|gene17686|gene20397|gene11576|gene20823|gene16898|gene11186|gene11185|gene20398|gene18088|gene20840|gene12557|gene16021|gene16004|gene18392|gene1052|gene6988|gene1497|gene1496|gene184|ge…	CCNA2;LOC106045971;CCNE2;JUN;IL6;EIF2AK2;NEDD4;NFKBIE;TRAF5;CD40;IRF7;PIK3R3;LOC106048210;LOC106049856;LOC106049848;NFKBIA;TRAF2;BLNK;MYC;CCND3;NFKB1;TNFAIP3;RBPJ;TRAF3;LOC106049912;DDX58;LOC10603007823;BAK1;CD3E;CD3D;LOC106049913;B2M;LOC10603007840;IKBKE;LOC106045119;SYK;PSD92;CD247;CASP3;LOC106044451;CD44;NFKB2;LOC106030078;LOC10602987820;MAP2K3;LOC106049914;PIK3AP171;PIK3AP170;GPR1613;RUNX3;LO…
13	map05332	Graft-versus-host disease		KEGG PATHWAY	13/2172	29/11318	0.00143161	0.0279584	Human Diseases	Immune disease	gene20213|gene20337|gene16782|gene20542|gene2407|gene19271|gene19270|gene20840|gene20407|gene20405|gene1071|gene2313|gene20644	IL1B;LOC106049848;LOC106045971;PRF1;IL6;PIK3AP171;PIK3AP170;LOC10603007840;LOC106049920;LOC106049922;CD80;CD28;LOC106029505
40	map05418	Fluid shear stress and atherosclerosis		KEGG PATHWAY	40/2172	136/11318	0.0025386	0.0443586	Human Diseases	Cardiovascular disease	gene15059|gene15614|gene3255|gene14183|gene10690|gene4965|gene3030|gene7584|gene17850|gene12205|gene5078|gene20213|gene7610|gene16763|gene13852|gene15338|gene3090|gene4973|gene16188|gene17700|gene11550|gene17334|gene10829|gene12858|gene2668|gene2665|gene13588|gene2666|gene8965|gene12197|gene12814|gene10183|gene208|gene14115|gene12857|gene18210|gene13386|gene15892|gene15871|gene10304	ASS1;LOC106044678;TRPV4;MMP2;GPC1;JUN;KDR;HMOX1;MMP9;SDC4;PIK3R3;IL1B;BLNK10;ITGB3;DUSP1;PLAT;MGST1;PRKAA2;NFKB1;HSP90AA1;NPPC;NQO1;VCAM1;IL1R2;LOC106030437;LOC106030435;LOC1060429688;LOC106030436;NOX1;SRC;LOC106041602;LOC106038708;LOC106030078;TXN;LOC106041672;MEF2C;THBD;LOC106044971;LOC10604815371;FOS
32	map04380	Osteoclast differentiation		KEGG PATHWAY	32/2172	104/11318	0.00304212	0.0504992	Organismal Systems	Development and regeneration	gene11094|gene17471|gene13304|gene13457|gene4965|gene12857|gene2053|gene20213|gene6211|gene16763|gene10253|gene8744|gene76|gene5078|gene16188|gene19789|gene12442|gene8965|gene13588|gene2120|gene7598|gene16004|gene184|gene208|gene10304|gene16658|gene1227|gene9293|gene1439|gene20646|gene9468|gene11333	CALCR;SOCS3;LOC106042201;CAMK4;JUN;LOC106041672;FOSL2;IL1B;LCP2;ITGB3;NFKBIA;TRAF2;BLNK;PIK3R3;NFKB1;LOC10603419789;SOCS1;NOX1;LOC1060429688;LOC106029911;NCF4;SYK;NFKB2;LOC106030078;FOS;LOC106045892;NFATC2;GPR1613;SPI1;LOC106029507;LCK;STAT1
27	map04662	B cell receptor signaling pathway		KEGG PATHWAY	27/2172	85/11318	0.00381001	0.0574965	Organismal Systems	Immune system	gene16487|gene2012|gene4965|gene1227|gene5078|gene192|gene7610|gene14041|gene17608|gene10253|gene4181|gene76|gene16188|gene20397|gene20630|gene19959|gene20398|gene20399|gene16004|gene208|gene10304|gene14042|gene18727|gene9293|gene16801|gene11669|gene18465	LOC106045683;NFKBIE;JUN;NFATC2;PIK3R3;PIK3AP1;BLNK10;CHST11;CD79B;NFKBIA;CARD11;BLNK;NFKB1;LOC106049912;LOC106029492;LOC106049445;LOC106049913;LOC106049914;SYK;LOC106030078;FOS;CHST12;DAPP1;GPR1613;PRKCB;INPP5D;NFKB265
29	map05322	Systemic lupus erythematosus		KEGG PATHWAY	29/2172	93/11318	0.00375189	0.0593156	Human Diseases	Immune disease	gene11984|gene16782|gene17853|gene1583|gene1582|gene1587|gene19271|gene19270|gene20338|gene1566|gene20121|gene20120|gene1569|gene1571|gene20397|gene9861|gene20398|gene20399|gene20840|gene12427|gene1071|gene18460|gene18723|gene13178|gene1575|gene20407|gene20405|gene2313|gene1568	C5;LOC106045971;CD40;LOC1060481533;LOC1060481532;LOC1060481537;PIK3AP171;PIK3AP170;LOC106049849;LOC106045814;LOC106049626;LOC106049629;LOC106045823;LOC106045128;LOC106049912;SNRPD1;LOC106049913;LOC106049914;LOC10603007840;GRIN2A;CD80;NFKB260;LOC106048111;LOC106042035;LOC106045840;LOC106049920;LOC106049922;CD28;LOC106045117
29	map04620	Toll-like receptor signaling pathway		KEGG PATHWAY	29/2172	94/11318	0.00445179	0.0615831	Organismal Systems	Immune system	gene12292|gene4965|gene2407|gene17853|gene2836|gene3889|gene5078|gene20213|gene10253|gene20146|gene16188|gene13649|gene19789|gene12638|gene10561|gene17686|gene12290|gene20823|gene12557|gene1071|gene13765|gene19459|gene208|gene10304|gene4218|gene5182|gene5185|gene11888|gene11333	LOC106041040;JUN;IL6;CD40;LY96;IRF7;PIK3R3;IL1B;NFKBIA;LOC106049641;NFKB1;LOC1060407229;LOC10603419789;LOC106041491;LOC106039090;TRAF3;LOC106041041;LOC10603007823;IKBKE;CD80;MAP3K8;IRF5;LOC106030078;FOS;MAP2K3;LOC106033293;LOC106033294;TIRAP;STAT1
14	map04216	Ferroptosis		KEGG PATHWAY	14/2172	36/11318	0.0047433	0.0629911	Cellular Processes	Cell growth and death	gene18788|gene13288|gene4029|gene1913|gene12219|gene7584|gene10056|gene6985|gene9378|gene18333|gene3210|gene18301|gene16186|gene10626	GPX4;CXCL1288;ACSL5;MAP1LC3C;SLC7A11;HMOX1;ACSL4;ACSL1;SAT1;CP;LOC106031011;PRNP;SLC39A8;TF
30	map04512	ECM-receptor interaction		KEGG PATHWAY	30/2172	98/11318	0.00438068	0.0632342	Environmental Information Processing	Signaling molecules and interaction	gene13591|gene8680|gene10062|gene8118|gene2296|gene14670|gene20084|gene2150|gene12205|gene6607|gene6237|gene16763|gene7346|gene19080|gene18555|gene6553|gene17377|gene13160|gene7292|gene10714|gene15414|gene7318|gene15519|gene4601|gene4508|gene19308|gene1497|gene1496|gene19690|gene12533	LAMC2;TNC;COL4A6;SV2B;ITGA4;ITGA11;COL2A1;ITGB6;SDC4;ITGB4;HMMR;ITGB3;ITGA2;LOC10602987880;COMP;CHAD;COL6A6;LAMB1;RELN;GP5;LOC106044440;CD36;THBS2;LAMA4;LAMA2;DAG1;LOC106044451;CD44;EIF2AK20;LAMB3
8	map00061	Fatty acid biosynthesis		KEGG PATHWAY	8/2172	16/11318	0.00535407	0.063484	Metabolism	Lipid metabolism	gene3267|gene17252|gene4029|gene17498|gene10056|gene6985|gene18977|gene2523	ACACB;ACSF3;ACSL5;FASN;ACSL4;ACSL1;ACSBG2;OXSM
15	map05330	Allograft rejection		KEGG PATHWAY	15/2172	40/11318	0.0052543	0.0646084	Human Diseases	Immune disease	gene20397|gene20337|gene19270|gene16782|gene20542|gene20398|gene20399|gene19271|gene1071|gene20840|gene20407|gene20405|gene17853|gene2313|gene20644	LOC106049912;LOC106049848;PIK3AP170;LOC106045971;PRF1;LOC106049913;LOC106049914;PIK3AP171;CD80;LOC10603007840;LOC106049920;LOC106049922;CD40;CD28;LOC106029505
49	map05203	Viral carcinogenesis		KEGG PATHWAY	49/2172	181/11318	0.00575772	0.0659159	Human Diseases	Cancer: overview	gene11987|gene11983|gene12662|gene15614|gene13574|gene2720|gene4965|gene1969|gene15653|gene3669|gene13264|gene1583|gene3889|gene5078|gene13265|gene18816|gene3569|gene20337|gene8056|gene10253|gene8744|gene12998|gene1566|gene16645|gene16188|gene20121|gene700|gene1568|gene17686|gene6988|gene5678|gene16898|gene16553|gene9869|gene7661|gene16004|gene12197|gene349|gene184|gene2495|gene19020|gene11883|ge…	GSN;TRAF1;YWHAG;LOC106044678;CCNA2;CCNE2;JUN;EIF2AK2;SRF;TRAF5;CXCL1264;LOC1060481533;IRF7;PIK3R3;CXCL1265;LOC106048210;PXN;LOC106049848;PMAIP1;NFKBIA;TRAF2;CCR4;LOC106045814;CCND3;NFKB1;LOC106049626;RBPJ;LOC106045117;TRAF3;CASP3;GTF2A2;BAK1;GTF2E1;LOC106038356;BLNK61;SYK;SRC;CDK1;NFKB2;KAT2B;LOC10602987820;CHEK1;LOC106042035;LOC106045128;LOC106029505;LOC106038357;SCIN;CREB3L1;CDC20
19	map05144	Malaria		KEGG PATHWAY	19/2172	55/11318	0.00518144	0.066163	Human Diseases	Infectious disease: parasitic	gene20213|gene12814|gene12755|gene19270|gene11169|gene19549|gene7321|gene20823|gene10829|gene2407|gene19271|gene5391|gene7318|gene19080|gene17853|gene15519|gene16782|gene18555|gene2370	IL1B;LOC106041602;LOC106041540;PIK3AP170;IL18;LRP1;HGF;LOC10603007823;VCAM1;IL6;PIK3AP171;POLN1;CD36;LOC10602987880;CD40;THBS2;LOC106045971;COMP;ITGB2
20	map05321	Inflammatory bowel disease (IBD)		KEGG PATHWAY	20/2172	60/11318	0.00659189	0.070597	Human Diseases	Immune disease	gene20213|gene19270|gene11169|gene20823|gene20840|gene16782|gene12853|gene4965|gene2407|gene10230|gene19271|gene14611|gene14612|gene16831|gene20407|gene16188|gene20405|gene11335|gene9042|gene11333	IL1B;PIK3AP170;IL18;LOC10603007823;LOC10603007840;LOC106045971;IL18R1;JUN;IL6;GATA3;PIK3AP171;IL23R;IL12RB2;IL21R;LOC106049920;NFKB1;LOC106049922;STAT4;IL2RG;STAT1
33	map04660	T cell receptor signaling pathway		KEGG PATHWAY	33/2172	113/11318	0.00647026	0.0716042	Organismal Systems	Immune system	gene19270|gene16487|gene15614|gene2012|gene16782|gene4965|gene497|gene496|gene5078|gene6211|gene10253|gene4181|gene16188|gene18476|gene2314|gene11186|gene11185|gene19959|gene15745|gene13765|gene1052|gene18968|gene208|gene2315|gene10304|gene1227|gene19271|gene10220|gene13131|gene2313|gene4906|gene9468|gene18465	PIK3AP170;LOC106045683;LOC106044678;NFKBIE;LOC106045971;JUN;CD8A;LOC106033965;PIK3R3;LCP2;NFKBIA;CARD11;NFKB1;NFKB276;CTLA4;CD3E;CD3D;LOC106049445;PDCD1;MAP3K8;CD247;ZAP70;LOC106030078;LOC106030066;FOS;NFATC2;PIK3AP171;PRKCQ;PTPRC;CD28;ITK;LCK;NFKB265
13	map05143	African trypanosomiasis		KEGG PATHWAY	13/2172	34/11318	0.00756469	0.0784837	Human Diseases	Infectious disease: parasitic	gene12814|gene20213|gene11169|gene20397|gene10829|gene20398|gene2407|gene20399|gene5391|gene13257|gene16801|gene11205|gene4601	LOC106041602;IL1B;IL18;LOC106049912;VCAM1;LOC106049913;IL6;LOC106049914;POLN1;CXCL1257;PRKCB;LOC106039769;LAMA4
29	map04750	Inflammatory mediator regulation of TRP channels		KEGG PATHWAY	29/2172	99/11318	0.00980326	0.0879644	Organismal Systems	Sensory system	gene8699|gene3255|gene18252|gene5078|gene1358|gene1359|gene1360|gene197|gene1356|gene20213|gene8803|gene6855|gene11403|gene15729|gene13257|gene2105|gene8006|gene12197|gene1361|gene7519|gene1362|gene1364|gene10183|gene16594|gene4218|gene12857|gene10220|gene16801|gene10970	LOC106037090;TRPV4;IL1RAP;PIK3R3;LOC106042968;LOC106042978;LOC106042985;LOC106034197;PLA2G4F;IL1B;PRKCH;HTR2A;HRH1;HTR2B;CXCL1257;ADCY5;PTGER4;SRC;LOC106043002;IGF1;LOC106042972;LOC106040722;LOC106038708;TRPV3;MAP2K3;LOC106041672;PRKCQ;PRKCB;ADCY7
16	map05320	Autoimmune thyroid disease		KEGG PATHWAY	16/2172	46/11318	0.0091984	0.0925415	Human Diseases	Immune disease	gene20397|gene20337|gene19270|gene16782|gene20542|gene20398|gene20399|gene19271|gene1071|gene20840|gene20407|gene20405|gene17853|gene2313|gene2314|gene20644	LOC106049912;LOC106049848;PIK3AP170;LOC106045971;PRF1;LOC106049913;LOC106049914;PIK3AP171;CD80;LOC10603007840;LOC106049920;LOC106049922;CD40;CD28;CTLA4;LOC106029505
21	map05217	Basal cell carcinoma		KEGG PATHWAY	21/2172	66/11318	0.00979784	0.0929395	Human Diseases	Cancer: specific types	gene8439|gene12283|gene4772|gene19671|gene17618|gene10159|gene3401|gene18661|gene11436|gene13212|gene4032|gene19020|gene16477|gene16898|gene2087|gene9629|gene11073|gene10796|gene10798|gene2357|gene13515	WNT3A;FZD9;HPSE272;WNT4;FZD2;LEF1;FZD10;FZD4;WNT7A;CXCL1212;TCF7L2;LOC10602987820;LOC106045698;BAK1;LOC1060300787;FZD3;FZD1;WNT10A;WNT6;FZD7;WNT11
21	map05133	Pertussis		KEGG PATHWAY	21/2172	66/11318	0.00979784	0.0929395	Human Diseases	Infectious disease: bacterial	gene20213|gene5733|gene11984|gene17769|gene17768|gene15614|gene10304|gene10183|gene20338|gene4965|gene2407|gene18460|gene6988|gene20146|gene12305|gene16188|gene11888|gene2836|gene4749|gene19767|gene2370	IL1B;SERPING1;C5;LOC106047052;LOC106047050;LOC106044678;FOS;LOC106038708;LOC106049849;JUN;IL6;NFKB260;CASP3;LOC106049641;LOC106041090;NFKB1;TIRAP;LY96;IRF1;LOC10603419767;ITGB2
22	map05140	Leishmaniasis		KEGG PATHWAY	22/2172	70/11318	0.00972625	0.0949739	Human Diseases	Infectious disease: parasitic	gene4965|gene2296|gene20213|gene9470|gene10253|gene16188|gene20397|gene5990|gene20823|gene13588|gene20398|gene20399|gene20840|gene7598|gene13288|gene10304|gene20407|gene16801|gene20405|gene2370|gene18465|gene11333	JUN;ITGA4;IL1B;MARCKSL1;NFKBIA;NFKB1;LOC106049912;PTGS2;LOC10603007823;LOC1060429688;LOC106049913;LOC106049914;LOC10603007840;NCF4;CXCL1288;FOS;LOC106049920;PRKCB;LOC106049922;ITGB2;NFKB265;STAT1
49	map05202	Transcriptional misregulation in cancer		KEGG PATHWAY	49/2172	188/11318	0.0121988	0.106579	Human Diseases	Cancer: overview	gene19270|gene11983|gene13574|gene16782|gene8797|gene2407|gene647|gene2746|gene968|gene15751|gene20089|gene17853|gene17850|gene18210|gene15178|gene14389|gene7713|gene9948|gene5032|gene20146|gene14384|gene15635|gene19016|gene9699|gene465|gene16188|gene16522|gene1568|gene20397|gene7519|gene16898|gene2120|gene14438|gene20398|gene20399|gene12031|gene15338|gene12858|gene12815|gene19337|gene19271|gene1…	PIK3AP170;TRAF1;CCNA2;LOC106045971;SIX4;IL6;PROM1;RUNX1T1;NFKBIZ;BCL6;DDIT3;CD40;MMP9;MEF2C;PML;ARNT2;NR4A3;MYC;CDKN2C;LOC106049641;BCL2A1;MEIS1;LOC10602987816;SUPT3H;PLAU;NFKB1;DOT1L;LOC106045117;LOC106049912;IGF1;BAK1;LOC106029911;RUNX1;LOC106049913;LOC106049914;PBX3;PLAT;IL1R2;RXRG;ETV4;PIK3AP171;ZEB1;ERG;LOC10602987820;TSPAN7;LOC106042836;HHEX;LOC106045128;SPI1
46	map05168	Herpes simplex virus 1 infection		KEGG PATHWAY	46/2172	175/11318	0.012706	0.108164	Human Diseases	Infectious disease: viral	gene12292|gene11984|gene17471|gene18088|gene2407|gene11964|gene19905|gene3669|gene3889|gene5078|gene6988|gene20335|gene15178|gene20337|gene16763|gene10253|gene8744|gene4855|gene10298|gene20253|gene16188|gene11125|gene17686|gene20213|gene17507|gene11576|gene20823|gene16898|gene20840|gene12557|gene1969|gene16004|gene3775|gene12197|gene15263|gene208|gene2596|gene11130|gene5182|gene5185|gene20407|gen…	LOC106041040;C5;SOCS3;B2M;IL6;CARD9;TJAP15;TRAF5;IRF7;PIK3R3;CASP3;LOC106049856;PML;LOC106049848;ITGB3;NFKBIA;TRAF2;CD74;EIF2B2;LOC106049745;NFKB1;POU2F3;TRAF3;IL1B;LOC106046816;DDX58;LOC10603007823;BAK1;LOC10603007840;IKBKE;EIF2AK2;SYK;SRSF5;SRC;LOC106044308;LOC106030078;MB21D1;PVRL1;LOC106033293;LOC106033294;LOC106049920;LOC106049922;LOC106029505;LOC106029502;TAP2;STAT1
24	map04146	Peroxisome		KEGG PATHWAY	24/2172	80/11318	0.0131465	0.109116	Cellular Processes	Transport and catabolism	gene12649|gene7675|gene15295|gene10595|gene5420|gene18932|gene16708|gene18879|gene20027|gene6985|gene5292|gene1504|gene14753|gene11084|gene8482|gene10056|gene2473|gene2647|gene16969|gene7215|gene4620|gene4029|gene20117|gene576	PEX12;BLNK75;PEX14;EHHADH;MPV17L;HSD17B4;PECR;LOC106048282;EPHX2;ACSL1;NUDT7;CAT;NUDT12;PEX1;ACAA1;ACSL4;HACL1;HMGCLL1;PHYH;ACOX2;DDO;ACSL5;LOC106049619;ACOX3
14	map04940	Type I diabetes mellitus		KEGG PATHWAY	14/2172	40/11318	0.0135559	0.10977	Human Diseases	Endocrine and metabolic disease	gene20213|gene4424|gene20337|gene16782|gene20542|gene19271|gene19270|gene20840|gene11359|gene20407|gene20405|gene1071|gene2313|gene20644	IL1B;CPE;LOC106049848;LOC106045971;PRF1;PIK3AP171;PIK3AP170;LOC10603007840;HSPD1;LOC106049920;LOC106049922;CD80;CD28;LOC106029505
15	map04623	Cytosolic DNA-sensing pathway		KEGG PATHWAY	15/2172	44/11318	0.0139975	0.110647	Organismal Systems	Immune system	gene12292|gene20213|gene12290|gene11169|gene10253|gene208|gene2596|gene2407|gene5182|gene5185|gene12305|gene16188|gene11576|gene12557|gene3889	LOC106041040;IL1B;LOC106041041;IL18;NFKBIA;LOC106030078;MB21D1;IL6;LOC106033293;LOC106033294;LOC106041090;NFKB1;DDX58;IKBKE;IRF7
38	map04630	Jak-STAT signaling pathway		KEGG PATHWAY	38/2172	141/11318	0.0148452	0.114619	Environmental Information Processing	Signal transduction	gene11193|gene17471|gene2407|gene7487|gene8032|gene14611|gene14612|gene8014|gene5078|gene8390|gene18816|gene9028|gene5402|gene19572|gene17587|gene13920|gene10215|gene16832|gene9948|gene16831|gene9415|gene9414|gene12442|gene9042|gene16946|gene16645|gene7599|gene15263|gene4849|gene8990|gene19020|gene14465|gene9522|gene19161|gene11335|gene20501|gene18465|gene11333	IL10RA;SOCS3;IL6;LOC106035752;PRLR;IL23R;IL12RB2;LIFR;PIK3R3;IL5RA;LOC106048210;IL13RA2;HAUS32;LIF;STAM2;CISH;IL2RA;LOC106046046;MYC;IL21R;IL22RA1;IFNLR1;SOCS1;IL2RG;LOC106046136;CCND3;LOC106035885;LOC106044308;PDGFRB;BOC0;LOC10602987820;IL10RB;CSF3R;IL11RA;STAT4;LOC106029353;NFKB265;STAT1
68	map04010	MAPK signaling pathway		KEGG PATHWAY	68/2172	278/11318	0.0164924	0.124442	Environmental Information Processing	Signal transduction	gene15854|gene7046|gene1361|gene13079|gene9570|gene3052|gene4965|gene3030|gene9326|gene15653|gene4218|gene13882|gene20089|gene8973|gene1360|gene9552|gene1359|gene7610|gene7321|gene18243|gene4014|gene20146|gene1356|gene8744|gene9948|gene16955|gene18365|gene16188|gene13078|gene11465|gene7975|gene18515|gene11109|gene17031|gene1358|gene4080|gene6988|gene530|gene1157|gene13562|gene2120|gene18536|gene3…	INSR;STK3;LOC106043002;EREG;FLNB;DUSP16;JUN;KDR;FIGF;SRF;MAP2K3;DUSP7;DDIT3;FGF13;LOC106042985;STMN1;LOC106042978;BLNK10;HGF;FGF12;DUSP5;LOC106049641;PLA2G4F;TRAF2;MYC;LOC106046186;PSD65;NFKB1;AREG;EPHA2;FGF10;RPS6KA1;HSPA8;TGFA;LOC106042968;MECOM;CASP3;FGFR3;STK4;PLA2G4F2;LOC106029911;SIPA1L26;DUSP10;BLNK61;CACNA1H;FGF9;MAP3K8;LOC106042972;DUSP3;IGF1;IL1B;RASGRF1;LOC106040722;PDGFRB;NFKB2;LOC106…
55	map04015	Rap1 signaling pathway		KEGG PATHWAY	55/2172	219/11318	0.0175648	0.129589	Environmental Information Processing	Signal transduction	gene15854|gene19270|gene8973|gene15614|gene16782|gene7164|gene5700|gene1853|gene9326|gene4218|gene8011|gene16609|gene6211|gene7610|gene16763|gene7321|gene1164|gene19987|gene6174|gene3030|gene5078|gene11465|gene5195|gene16183|gene8728|gene13258|gene18243|gene3857|gene13562|gene19959|gene12427|gene2105|gene7238|gene11699|gene7312|gene12556|gene13873|gene12197|gene7519|gene7975|gene14052|gene4849|ge…	INSR;PIK3AP170;FGF13;LOC106044678;LOC106045971;CNR1;TLN2;SIPA1L2;FIGF;MAP2K3;FYB;ADORA2B;LCP2;BLNK10;ITGB3;HGF;LOC106041081;LPAR2;ARAP3;KDR;PIK3R3;EPHA2;PARD6A;PARD3;GRIN1;CXCL1258;FGF12;PRKD1;PLA2G4F2;LOC106049445;GRIN2A;ADCY5;MAGI1;FGF9;MAGI2;RASSF5;RGS14;SRC;IGF1;FGF10;LPAR4;PDGFRB;LOC106038708;LPAR1;GNAO1;PIK3AP171;FGFR4;EVC2;PRKCB;LPAR5;LOC106046593;ADCY7;FGFR3;LOC106046592;ITGB2
32	map04915	Estrogen signaling pathway		KEGG PATHWAY	32/2172	117/11318	0.0194489	0.140371	Organismal Systems	Endocrine system	gene14183|gene4965|gene17850|gene5078|gene16933|gene13840|gene18597|gene18595|gene18594|gene18593|gene18591|gene20067|gene20068|gene20069|gene7691|gene18599|gene17031|gene20066|gene17700|gene2105|gene7661|gene12197|gene5530|gene10183|gene10304|gene18743|gene14137|gene11109|gene8833|gene10970|gene18600|gene1416	MMP2;JUN;MMP9;PIK3R3;TBC1D153;HBEGF;LOC106048008;LOC106048012;LOC106048010;LOC106047978;LOC106047977;KRT23;KRT20;LOC106049573;BLNK91;LOC106048011;TGFA;LOC106049570;HSP90AA1;ADCY5;BLNK61;SRC;GPER1;LOC106038708;FOS;FKBP4;GNAO1;HSPA8;HSPA2;ADCY7;LOC106047979;CREB3L1
33	map05162	Measles		KEGG PATHWAY	33/2172	123/11318	0.0234942	0.147171	Human Diseases	Infectious disease: viral	gene16782|gene2720|gene4965|gene2407|gene1969|gene3889|gene5078|gene6988|gene20213|gene10253|gene10215|gene16645|gene16188|gene13649|gene9042|gene11109|gene17686|gene18816|gene11576|gene20823|gene16898|gene4565|gene11185|gene12557|gene11186|gene208|gene10304|gene19271|gene19270|gene8833|gene2313|gene7825|gene11333	LOC106045971;CCNE2;JUN;IL6;EIF2AK2;IRF7;PIK3R3;CASP3;IL1B;NFKBIA;IL2RA;CCND3;NFKB1;LOC1060407229;IL2RG;HSPA8;TRAF3;LOC106048210;DDX58;LOC10603007823;BAK1;TNFAIP3;CD3D;IKBKE;CD3E;LOC106030078;FOS;PIK3AP171;PIK3AP170;HSPA2;CD28;LOC106036132;STAT1
27	map05222	Small cell lung cancer		KEGG PATHWAY	27/2172	97/11318	0.0241772	0.148645	Human Diseases	Cancer: specific types	gene13591|gene11983|gene2720|gene10062|gene3669|gene5078|gene6988|gene7346|gene8744|gene9948|gene16188|gene17686|gene13160|gene16898|gene15997|gene16021|gene2519|gene4601|gene4508|gene18392|gene12815|gene208|gene10253|gene19020|gene10080|gene5990|gene12533	LAMC2;TRAF1;CCNE2;COL4A6;TRAF5;PIK3R3;CASP3;ITGA2;TRAF2;MYC;NFKB1;TRAF3;LAMB1;BAK1;CKS2;LOC106045119;RARB;LAMA4;LAMA2;PSD92;RXRG;LOC106030078;NFKBIA;LOC10602987820;XIAP;PTGS2;LAMB3
51	map05163	Human cytomegalovirus infection		KEGG PATHWAY	51/2172	204/11318	0.0233983	0.149389	Human Diseases	Infectious disease: viral	gene11193|gene20029|gene15614|gene18088|gene2407|gene14465|gene3669|gene12857|gene5078|gene5182|gene20213|gene20335|gene6455|gene16763|gene10253|gene8744|gene132|gene9948|gene20641|gene16188|gene18392|gene12638|gene12292|gene6988|gene12290|gene5990|gene16898|gene10735|gene9869|gene16692|gene2105|gene7610|gene16021|gene8006|gene12197|gene20337|gene10183|gene208|gene19020|gene2596|gene14137|gene122…	IL10RA;PTK2B;LOC106044678;B2M;IL6;IL10RB;TRAF5;LOC106041672;PIK3R3;LOC106033293;IL1B;LOC106049856;GNA13;ITGB3;NFKBIA;TRAF2;CXCL12;MYC;LOC106029502;NFKB1;PSD92;LOC106041491;LOC106041040;CASP3;LOC106041041;PTGS2;BAK1;CXCR4;LOC106038356;LOC106045913;ADCY5;BLNK10;LOC106045119;PTGER4;SRC;LOC106049848;LOC106038708;LOC106030078;LOC10602987820;MB21D1;GNAO1;NFATC2;PXN;BLNK61;LOC106033294;PRKCB;LOC10602950…
10	map05020	Prion diseases		KEGG PATHWAY	10/2172	27/11318	0.0231416	0.150647	Human Diseases	Neurodegenerative disease	gene20213|gene4693|gene11984|gene12292|gene2407|gene12027|gene8620|gene5185|gene18301|gene5182	IL1B;EGR1;C5;LOC106041040;IL6;HSPA5;NCAM2;LOC106033294;PRNP;LOC106033293
42	map04062	Chemokine signaling pathway		KEGG PATHWAY	42/2172	163/11318	0.0231277	0.153568	Organismal Systems	Immune system	gene9866|gene15614|gene923|gene5078|gene18816|gene4637|gene20029|gene6216|gene10253|gene12998|gene17812|gene14267|gene132|gene16188|gene12638|gene16183|gene12292|gene9867|gene12290|gene556|gene10735|gene19959|gene9869|gene16692|gene10970|gene7610|gene16801|gene12197|gene20461|gene2105|gene208|gene1195|gene3569|gene5182|gene5185|gene19163|gene19162|gene9870|gene20074|gene4906|gene12997|gene11333	CXCR6;LOC106044678;LOC106038263;PIK3R3;LOC106048210;FOXO3;PTK2B;DOCK2;NFKBIA;CCR4;HCK;LOC106043193;CXCL12;NFKB1;LOC106041491;PARD3;LOC106041040;XCR1;LOC106041041;GRK4;CXCR4;LOC106049445;LOC106038356;LOC106045913;ADCY7;BLNK10;PRKCB;SRC;ADRBK1;ADCY5;LOC106030078;PREX1;PXN;LOC106033293;LOC106033294;LOC106048600;LOC106048595;LOC106038357;CCR7;ITK;CX3CR1;STAT1
41	map04072	Phospholipase D signaling pathway		KEGG PATHWAY	41/2172	158/11318	0.0219976	0.155387	Environmental Information Processing	Signal transduction	gene15854|gene20397|gene1827|gene15544|gene5078|gene1358|gene1359|gene6455|gene20029|gene19987|gene15614|gene20398|gene1356|gene7870|gene13258|gene17468|gene12296|gene11578|gene17397|gene12795|gene20399|gene16692|gene10970|gene17969|gene1362|gene5491|gene16004|gene1364|gene1361|gene1360|gene20038|gene14052|gene15263|gene4849|gene2105|gene14118|gene15538|gene6002|gene5897|gene18486|gene1417	INSR;LOC106049912;LOC106047885;LOC106044634;PIK3R3;LOC106042968;LOC106042978;GNA13;PTK2B;LPAR2;LOC106044678;LOC106049913;PLA2G4F;AGTR1;CXCL1258;CYTH1;LOC106041043;DGKQ;GAB1;DNM3;LOC106049914;LOC106045913;ADCY7;DNM1;LOC106042972;CYTH3;SYK;LOC106040722;LOC106043002;LOC106042985;LOC106049530;LPAR4;LOC106044308;PDGFRB;ADCY5;LPAR1;AGT;EVC2;PTGFR;LPAR5;DGKZ
41	map04145	Phagosome		KEGG PATHWAY	41/2172	158/11318	0.0219976	0.155387	Cellular Processes	Transport and catabolism	gene20397|gene3373|gene16684|gene20335|gene20337|gene2573|gene7346|gene14247|gene8686|gene20146|gene8702|gene8543|gene10772|gene18555|gene10561|gene2574|gene12772|gene2571|gene12566|gene20823|gene13588|gene20398|gene20399|gene20840|gene16758|gene7598|gene15519|gene19080|gene16763|gene6775|gene2944|gene13288|gene7318|gene15892|gene20407|gene20405|gene20644|gene12606|gene20641|gene20642|gene2370	LOC106049912;TCTN2;LOC106045884;LOC106049856;LOC106049848;LOC106030347;ITGA2;ATP6V1B1;ATP6V1G1;LOC106049641;TUBB4B;EEA1;MARCO;COMP;LOC106039090;LOC106030346;SEC22B;LOC106030345;RAB7B;LOC10603007823;LOC1060429688;LOC106049913;LOC106049914;LOC10603007840;MRC2;NCF4;THBS2;LOC10602987880;ITGB3;TUBB6;ATP6V1C2;CXCL1288;CD36;LOC106044971;LOC106049920;LOC106049922;LOC106029505;RILP;LOC106029502;TAP2;ITGB2
38	map04310	Wnt signaling pathway		KEGG PATHWAY	38/2172	145/11318	0.0229918	0.155781	Environmental Information Processing	Signal transduction	gene12283|gene16220|gene19671|gene3401|gene18661|gene11436|gene4965|gene4941|gene12301|gene16686|gene13515|gene16645|gene7610|gene15614|gene4032|gene9004|gene9948|gene9532|gene8439|gene10798|gene6012|gene1697|gene10159|gene16925|gene10796|gene10428|gene4772|gene13212|gene1814|gene4351|gene9629|gene19335|gene17618|gene15348|gene1227|gene2357|gene11073|gene16801	FZD9;DKK2;WNT4;FZD10;FZD4;WNT7A;JUN;ROR1;RNF43;LGR6;WNT11;CCND3;BLNK10;LOC106044678;TCF7L2;GPC4;MYC;RSPO1;WNT3A;WNT6;EVC22;LGR5;LEF1;PPARD;WNT10A;CTBP2;HPSE272;CXCL1212;PRICKLE1;SFRP2;FZD3;SOST;FZD2;SFRP1;NFATC2;FZD7;FZD1;PRKCB
36	map04621	NOD-like receptor signaling pathway		KEGG PATHWAY	36/2172	138/11318	0.0281465	0.169903	Organismal Systems	Immune system	gene12292|gene15614|gene14429|gene4965|gene20707|gene11964|gene12305|gene3669|gene3889|gene20213|gene17769|gene17768|gene10253|gene8744|gene20599|gene16188|gene17700|gene12557|gene17686|gene11169|gene13146|gene4565|gene9668|gene2407|gene18290|gene18291|gene13288|gene208|gene14115|gene10080|gene15161|gene5182|gene5185|gene17145|gene11333|gene2765	LOC106041040;LOC106044678;LOC106043382;JUN;LOC106029573;CARD9;LOC106041090;TRAF5;IRF7;IL1B;LOC106047052;LOC106047050;NFKBIA;TRAF2;LOC106029457;NFKB1;HSP90AA1;IKBKE;TRAF3;IL18;NAMPT;TNFAIP3;LOC106038139;IL6;ANTXR1;GKN1;CXCL1288;LOC106030078;TXN;XIAP;PSTPIP1;LOC106033293;LOC106033294;LOC106046397;STAT1;RIPK2
25	map04657	IL-17 signaling pathway		KEGG PATHWAY	25/2172	90/11318	0.0299706	0.171556	Organismal Systems	Immune system	gene19639|gene4965|gene12557|gene3669|gene17850|gene3340|gene20213|gene10253|gene8744|gene16188|gene17700|gene12638|gene17686|gene6988|gene5597|gene4565|gene2407|gene208|gene10304|gene5182|gene5990|gene6006|gene9668|gene20646|gene19290	LOC106049125;JUN;IKBKE;TRAF5;MMP9;ANAPC5;IL1B;NFKBIA;TRAF2;NFKB1;HSP90AA1;LOC106041491;TRAF3;CASP3;MAPK6;TNFAIP3;IL6;LOC106030078;FOS;LOC106033293;PTGS2;EVC6;LOC106038139;LOC106029507;PIK3AP190
10	map05310	Asthma		KEGG PATHWAY	10/2172	28/11318	0.0299701	0.17768	Human Diseases	Immune disease	gene20397|gene16782|gene20398|gene20399|gene19271|gene19270|gene20840|gene20407|gene20405|gene17853	LOC106049912;LOC106045971;LOC106049913;LOC106049914;PIK3AP171;PIK3AP170;LOC10603007840;LOC106049920;LOC106049922;CD40
10	map00592	alpha-Linolenic acid metabolism		KEGG PATHWAY	10/2172	28/11318	0.0299701	0.17768	Metabolism	Lipid metabolism	gene1358|gene1359|gene1362|gene1361|gene1360|gene1356|gene11513|gene8482|gene576|gene1364	LOC106042968;LOC106042978;LOC106042972;LOC106043002;LOC106042985;PLA2G4F;LOC106040243;ACAA1;ACOX3;LOC106040722
56	map05130	Pathogenic Escherichia coli infection		KEGG PATHWAY	56/2172	231/11318	0.0322864	0.181679	Human Diseases	Infectious disease: bacterial	gene19675|gene2468|gene4965|gene2407|gene17812|gene7638|gene12305|gene12308|gene20213|gene18771|gene6455|gene17769|gene17768|gene20397|gene10253|gene19987|gene18970|gene15614|gene2585|gene6379|gene16188|gene4107|gene20652|gene13022|gene13258|gene17468|gene3261|gene8702|gene16898|gene20201|gene6562|gene20398|gene20399|gene19851|gene5491|gene6138|gene17620|gene17870|gene6775|gene6988|gene14052|gene…	CLDN19;WIPF3;JUN;IL6;HCK;BLNK38;LOC106041090;LOC106041034;IL1B;LOC106048174;GNA13;LOC106047052;LOC106047050;LOC106049912;NFKBIA;LPAR2;MYO1F;LOC106044678;MYO6;NCKAP1;NFKB1;TNFSF10;LOC106029514;FAM175A;CXCL1258;CYTH1;MYO1H;TUBB4B;BAK1;TNFRSF10B;LOC106034617;LOC106049913;LOC106049914;CLDN10;CYTH3;CLDN20;MYO1D;LOC106047195;TUBB6;CASP3;LPAR4;LOC106044308;LOC106048163;LPAR1;LOC106030078;FOS;LOC10604167…
55	map05205	Proteoglycans in cancer		KEGG PATHWAY	55/2172	229/11318	0.0394826	0.198609	Human Diseases	Cancer: overview	gene12283|gene19671|gene18748|gene15614|gene18661|gene11436|gene14183|gene10690|gene3030|gene17850|gene12205|gene5078|gene13515|gene6988|gene1496|gene16763|gene7321|gene7346|gene350|gene3401|gene9570|gene13840|gene9948|gene465|gene8439|gene13027|gene2265|gene18344|gene17397|gene8539|gene20823|gene13562|gene10796|gene19959|gene978|gene13212|gene9629|gene10798|gene12197|gene17618|gene7519|gene1497|…	FZD9;WNT4;LOC106048163;LOC106044678;FZD4;WNT7A;MMP2;GPC1;KDR;MMP9;SDC4;PIK3R3;WNT11;CASP3;CD44;ITGB3;HGF;ITGA2;ANK3;FZD10;FLNB;HBEGF;MYC;PLAU;WNT3A;HPSE;PAPSS25;LOC106047723;GAB1;DCN;LOC10603007823;PLA2G4F2;WNT10A;LOC106049445;CBLB;CXCL1212;FZD3;WNT6;SRC;FZD2;IGF1;LOC106044451;LOC106044308;ANK1;LUM;HPSE2;FLNC;LOC10602987820;PXN;FZD7;LOC106044971;FZD1;PRKCB;EIF2AK20;NFKB265
27	map05215	Prostate cancer		KEGG PATHWAY	27/2172	101/11318	0.0393342	0.200907	Human Diseases	Cancer: specific types	gene2720|gene13751|gene1942|gene17850|gene5078|gene4772|gene10253|gene15338|gene20236|gene4032|gene465|gene16188|gene17700|gene17031|gene10159|gene7661|gene16021|gene18392|gene12858|gene7519|gene16393|gene4849|gene7842|gene19020|gene208|gene6002|gene1416	CCNE2;ZEB1;SRD5A2;MMP9;PIK3R3;HPSE272;NFKBIA;PLAT;INSRR;TCF7L2;PLAU;NFKB1;HSP90AA1;TGFA;LEF1;BLNK61;LOC106045119;PSD92;IL1R2;IGF1;AR;PDGFRB;ERG;LOC10602987820;LOC106030078;EVC2;CREB3L1
46	map04360	Axon guidance		KEGG PATHWAY	46/2172	187/11318	0.0388735	0.201656	Organismal Systems	Development and regeneration	gene19394|gene15988|gene19671|gene3545|gene15614|gene20451|gene15079|gene13572|gene15187|gene5078|gene1040|gene7326|gene7610|gene1270|gene13743|gene16625|gene19208|gene13928|gene7329|gene132|gene19272|gene11465|gene13942|gene16183|gene15956|gene8549|gene18452|gene10735|gene15801|gene7319|gene14989|gene899|gene12312|gene12197|gene9629|gene5579|gene4045|gene5195|gene16293|gene5330|gene1227|gene579|…	LRRC4;LOC106045044;WNT4;LIMK2;LOC106044678;RHOD;NTNG2;TRPC3;SEMA7A;PIK3R3;EPHA6;SEMA3E;BLNK10;BMP7;NRP1;SSH2;PIK3AP108;LOC106042805;SEMA3D;CXCL12;EPHB6;EPHA2;SEMA3G;PARD3;PLXNB1;PLXNC1;NFKB252;CXCR4;LOC10604815301;SEMA3C;EPHA5;BOC;LIMK1;SRC;FZD3;SEMA6D;ABLIM1;PARD6A;MYL9;NTN3;NFATC2;ABLIM2;PLXNA4;LOC106044308;ABLIM3;TRPC6
11	map05216	Thyroid cancer		KEGG PATHWAY	11/2172	33/11318	0.0387445	0.204177	Human Diseases	Cancer: specific types	gene12815|gene4772|gene19020|gene10159|gene16898|gene353|gene4032|gene421|gene9948|gene17324|gene17323	RXRG;HPSE272;LOC10602987820;LEF1;BAK1;CCDC6;TCF7L2;RET;MYC;LOC106046593;LOC106046592
13	map00140	Steroid hormone biosynthesis		KEGG PATHWAY	13/2172	41/11318	0.0385652	0.20651	Metabolism	Lipid metabolism	gene15194|gene1468|gene1619|gene197|gene19862|gene4186|gene17258|gene10519|gene1942|gene5146|gene14975|gene12531|gene14973	LOC106044188;HSD17B12;LOC106046243;LOC106034197;SULT2B1;LOC106032071;LOC106046522;LOC106039057;SRD5A2;HSD11B2;LOC1060444515;LOC106041294;LOC106043981
10	map04977	Vitamin digestion and absorption		KEGG PATHWAY	10/2172	29/11318	0.038106	0.207397	Organismal Systems	Digestive system	gene20385|gene19688|gene19882|gene6186|gene11034|gene914|gene7925|gene6070|gene11205|gene5091	SLC5A6;SLC46A1;SLC52A3;SLC23A1;LOC106039631;SLC19A2;LOC106036180;LOC106034162;LOC106039769;MMACHC
14	map04978	Mineral absorption		KEGG PATHWAY	14/2172	45/11318	0.0380001	0.210267	Organismal Systems	Digestive system	gene19688|gene12568|gene16397|gene14429|gene9335|gene11064|gene10093|gene11065|gene19273|gene16418|gene7584|gene695|gene10626|gene20082	SLC46A1;SLC26A9;HEPH;LOC106043382;S100G;STEAP1;LOC106038686;STEAP2;LOC106048722;SLC8A1;HMOX1;SLC34A2;TF;VDR
78	map04151	PI3K-Akt signaling pathway		KEGG PATHWAY	78/2172	339/11318	0.0429268	0.212712	Environmental Information Processing	Signal transduction	gene15854|gene18243|gene13591|gene8973|gene12662|gene8680|gene13079|gene13078|gene2720|gene10062|gene2407|gene15544|gene8032|gene2296|gene9326|gene9309|gene20084|gene2150|gene5078|gene6607|gene9522|gene192|gene16645|gene10250|gene16763|gene7321|gene7346|gene19987|gene7933|gene13160|gene10215|gene9948|gene4508|gene16188|gene17700|gene3030|gene11465|gene9042|gene7975|gene18555|gene18365|gene17031|g…	INSR;FGF12;LAMC2;FGF13;YWHAG;TNC;EREG;AREG;CCNE2;COL4A6;IL6;LOC106044634;PRLR;ITGA4;FIGF;MTCP1;COL2A1;ITGB6;PIK3R3;ITGB4;CSF3R;PIK3AP1;CCND3;PPP2R3C;ITGB3;HGF;ITGA2;LPAR2;IRS1;LAMB1;IL2RA;MYC;LAMA2;NFKB1;HSP90AA1;KDR;EPHA2;IL2RG;FGF10;COMP;PSD65;TGFA;CXCL1258;LOC106049912;COL6A6;LOC10603007823;PRKAA2;PLA2G4F2;FOXO3;LPAR5;RELN;LOC106049913;LOC106049914;BLNK61;MAGI1;FGF9;MAGI2;THBS2;ITGA11;SYK;LAMA…
74	map05165	Human papillomavirus infection		KEGG PATHWAY	74/2172	321/11318	0.045838	0.214341	Human Diseases	Infectious disease: viral	gene12283|gene13591|gene19671|gene3401|gene13574|gene11436|gene8006|gene2720|gene10062|gene12557|gene3373|gene8686|gene2296|gene14670|gene2815|gene20084|gene2150|gene5078|gene13515|gene6607|gene20337|gene10250|gene16763|gene7614|gene14247|gene15519|gene13212|gene4032|gene18661|gene16645|gene4508|gene16188|gene10796|gene5195|gene10798|gene13927|gene7825|gene700|gene18555|gene17686|gene8680|gene655…	FZD9;LAMC2;WNT4;FZD10;CCNA2;WNT7A;PTGER4;CCNE2;COL4A6;IKBKE;TCTN2;ATP6V1G1;ITGA4;ITGA11;HEY1;COL2A1;ITGB6;PIK3R3;WNT11;ITGB4;LOC106049848;PPP2R3C;ITGB3;BLNK14;ATP6V1B1;THBS2;CXCL1212;TCF7L2;FZD4;CCND3;LAMA2;NFKB1;WNT10A;PARD6A;WNT6;LOC106042804;LOC106036132;RBPJ;COMP;TRAF3;TNC;CHAD;COL6A6;LAMB1;BAK1;WNT3A;RELN;LAMB3;HPSE272;MAGI1;PSD92;MAML2;LOC106034617;LAMA4;LOC10602987880;FZD2;IRF1;CASP3;ATP6V…
14	map00565	Ether lipid metabolism		KEGG PATHWAY	14/2172	46/11318	0.0453005	0.214854	Metabolism	Lipid metabolism	gene1358|gene16891|gene1362|gene1361|gene1360|gene8850|gene6992|gene1359|gene1356|gene1364|gene10119|gene11513|gene9713|gene190	LOC106042968;CEPT1;LOC106042972;LOC106043002;LOC106042985;HHEX50;ENPP6;LOC106042978;PLA2G4F;LOC106040722;UGT8;LOC106040243;PLA2G7;LOC106029878
51	map05132	Salmonella infection		KEGG PATHWAY	51/2172	212/11318	0.0447719	0.215424	Human Diseases	Infectious disease: bacterial	gene15613|gene15614|gene4032|gene4965|gene2407|gene20146|gene17870|gene12305|gene2836|gene20213|gene4772|gene17769|gene10159|gene10253|gene8744|gene9570|gene2585|gene9948|gene6379|gene16188|gene17700|gene4107|gene20652|gene12821|gene10561|gene6988|gene17468|gene12566|gene20823|gene3558|gene3559|gene20201|gene5491|gene19119|gene11169|gene17768|gene16293|gene208|gene14115|gene19456|gene15226|gene42…	RHOB;LOC106044678;TCF7L2;JUN;IL6;LOC106049641;LOC106047195;LOC106041090;LY96;IL1B;HPSE272;LOC106047052;LEF1;NFKBIA;TRAF2;FLNB;MYO6;MYC;NCKAP1;NFKB1;HSP90AA1;TNFSF10;LOC106029514;GCC2;LOC106039090;CASP3;CYTH1;RAB7B;LOC10603007823;LOC106031351;LOC106031352;TNFRSF10B;CYTH3;RHOG;IL18;LOC106047050;MYL9;LOC106030078;TXN;FLNC;DYNLT1;MAP2K3;SNX9;BAK1;PTPRC;TIRAP;LOC106038521;RILP;CYFIP2;FOS;RIPK2
22	map04914	Progesterone-mediated oocyte maturation		KEGG PATHWAY	22/2172	80/11318	0.0442819	0.2162	Organismal Systems	Endocrine system	gene18084|gene17512|gene5647|gene13574|gene10599|gene5078|gene4697|gene13398|gene10098|gene16810|gene17700|gene3340|gene18515|gene16499|gene2105|gene12192|gene7519|gene349|gene1261|gene10970|gene20037|gene13228	CPEB1;CDC25A;CCNB2;CCNA2;ANAPC13;PIK3R3;LOC106032718;BUB1;MAD2L1;PLK1;HSP90AA1;ANAPC5;RPS6KA1;FZR1;ADCY5;PDE3B;IGF1;CDK1;AURKA;ADCY7;CCNB3;CXCL1228
11	map04960	Aldosterone-regulated sodium reabsorption		KEGG PATHWAY	11/2172	34/11318	0.0476682	0.219803	Organismal Systems	Excretory system	gene15854|gene7519|gene18522|gene7933|gene4319|gene16816|gene4293|gene5146|gene18496|gene16801|gene5078	INSR;IGF1;SFN;IRS1;NR3C2;SCNN1B;SLC9A3R2;HSD11B2;NFKB296;PRKCB;PIK3R3
4	map00981	Insect hormone biosynthesis		KEGG PATHWAY	4/2172	8/11318	0.049093	0.220255	Metabolism	Metabolism of terpenoids and polyketides	gene20768|gene16586|gene16587|gene3295	LOC106029637;LOC106045763;LOC106045817;ALDH2
4	map00430	Taurine and hypotaurine metabolism		KEGG PATHWAY	4/2172	8/11318	0.049093	0.220255	Metabolism	Metabolism of other amino acids	gene14372|gene3517|gene18879|gene16291	GADL1;GGT1;LOC106048282;GGT7
19	map04115	p53 signaling pathway		KEGG PATHWAY	19/2172	68/11318	0.0507788	0.221823	Cellular Processes	Cell growth and death	gene6988|gene19709|gene16645|gene9039|gene5647|gene8056|gene7519|gene18522|gene20037|gene4566|gene2720|gene19020|gene13175|gene2935|gene13228|gene349|gene11327|gene11883|gene6036	CASP3;LOC10603419709;CCND3;LOC106037440;CCNB2;PMAIP1;IGF1;SFN;CCNB3;LOC106032402;CCNE2;LOC10602987820;GTSE1;RRM2;CXCL1228;CDK1;SERPINB5;CHEK1;SESN3
33	map04110	Cell cycle		KEGG PATHWAY	33/2172	130/11318	0.0488438	0.222139	Cellular Processes	Cell growth and death	gene12269|gene17512|gene12662|gene18522|gene19020|gene2720|gene10599|gene6255|gene5032|gene4697|gene13398|gene10098|gene16810|gene19150|gene3455|gene9948|gene9675|gene5173|gene16645|gene3340|gene10737|gene16499|gene13574|gene16021|gene18392|gene349|gene20037|gene12165|gene9911|gene13228|gene5647|gene11883|gene5872	LOC106041004;CDC25A;YWHAG;SFN;LOC10602987820;CCNE2;ANAPC13;PTTG1;CDKN2C;LOC106032718;BUB1;MAD2L1;PLK1;TTK;CDC45;MYC;MCM3;E2F4;CCND3;ANAPC5;MCM6;FZR1;CCNA2;LOC106045119;PSD92;CDK1;CCNB3;WEE1;MCM4;CXCL1228;CCNB2;CHEK1;CDC20
81	map04080	Neuroactive ligand-receptor interaction		KEGG PATHWAY	81/2172	357/11318	0.0529018	0.228096	Environmental Information Processing	Signaling molecules and interaction	gene17479|gene11094|gene20455|gene8699|gene6965|gene7491|gene4881|gene7164|gene15544|gene8032|gene14089|gene11984|gene7410|gene4364|gene16663|gene6432|gene2995|gene16609|gene7368|gene20028|gene11636|gene6855|gene1164|gene8472|gene3342|gene7367|gene20058|gene14211|gene18170|gene17316|gene14050|gene16896|gene11771|gene7870|gene10346|gene7691|gene12521|gene8728|gene8354|gene13258|gene12116|gene11635…	GCGR;CALCR;LOC106029317;LOC106037090;MTNR1A;P2RY8;GRIA1;CNR1;LOC106044634;PRLR;GRIN3A;C5;HTR1A;NPY2R;ADORA1;SSTR2;GABRA4;ADORA2B;LOC106035576;CHRNA2;LOC106040281;HTR2A;LOC106041081;CRHR2;LOC106031149;LOC106035583;MRPL148;LHCGR;LOC106047519;EDN2;CYSLTR1;LOC106046185;CHRNB3;AGTR1;HTR5A;BLNK91;LOC106041380;GRIN1;OXTR;CXCL1258;HRH3;LOC106040280;LOC106040278;EDN3;HRH2;HRH1;HTR2B;LOC106048153;EDNRA;GRI…
33	map04217	Necroptosis		KEGG PATHWAY	33/2172	131/11318	0.0536828	0.228496	Cellular Processes	Cell growth and death	gene8697|gene14429|gene13304|gene1969|gene12305|gene3669|gene1582|gene1587|gene1358|gene1359|gene20213|gene17769|gene17768|gene8744|gene1356|gene17700|gene20120|gene1569|gene18816|gene3434|gene4565|gene1364|gene1361|gene1360|gene1362|gene20201|gene13288|gene18723|gene10080|gene1575|gene11335|gene11333|gene4107	LOC106037044;LOC106043382;LOC106042201;EIF2AK2;LOC106041090;TRAF5;LOC1060481532;LOC1060481537;LOC106042968;LOC106042978;IL1B;LOC106047052;LOC106047050;TRAF2;PLA2G4F;HSP90AA1;LOC106049629;LOC106045823;LOC106048210;PGAM5;TNFAIP3;LOC106040722;LOC106043002;LOC106042985;LOC106042972;TNFRSF10B;CXCL1288;LOC106048111;XIAP;LOC106045840;STAT4;STAT1;TNFSF10
20	map04920	Adipocytokine signaling pathway		KEGG PATHWAY	20/2172	73/11318	0.0552318	0.229212	Organismal Systems	Endocrine system	gene12815|gene15263|gene11543|gene3267|gene208|gene10253|gene17471|gene7933|gene2012|gene10056|gene6985|gene18977|gene10220|gene8744|gene7318|gene16188|gene4973|gene4029|gene679|gene3131	RXRG;LOC106044308;TNFRSF1B;ACACB;LOC106030078;NFKBIA;SOCS3;IRS1;NFKBIE;ACSL4;ACSL1;ACSBG2;PRKCQ;TRAF2;CD36;NFKB1;PRKAA2;ACSL5;PPARGC1A;DNA21
47	map05170	Human immunodeficiency virus 1 infection		KEGG PATHWAY	47/2172	196/11318	0.0548175	0.230372	Human Diseases	Infectious disease: viral	gene19270|gene11543|gene4697|gene3545|gene16782|gene4965|gene4218|gene3669|gene5078|gene5647|gene6988|gene20335|gene20337|gene20029|gene10253|gene8744|gene16188|gene18476|gene10735|gene7955|gene20823|gene16898|gene11186|gene11185|gene18088|gene7610|gene9869|gene12312|gene1052|gene349|gene19271|gene10183|gene208|gene10304|gene11883|gene20037|gene2596|gene14137|gene1227|gene3569|gene12165|gene13228…	PIK3AP170;TNFRSF1B;LOC106032718;LIMK2;LOC106045971;JUN;MAP2K3;TRAF5;PIK3R3;CCNB2;CASP3;LOC106049856;LOC106049848;PTK2B;NFKBIA;TRAF2;NFKB1;NFKB276;CXCR4;AP1S3;LOC10603007823;BAK1;CD3E;CD3D;B2M;BLNK10;LOC106038356;LIMK1;CD247;CDK1;PIK3AP171;LOC106038708;LOC106030078;FOS;CHEK1;CCNB3;MB21D1;GNAO1;NFATC2;PXN;WEE1;CXCL1228;PRKCB;LOC106029505;LOC106038357;LOC106029502;TAP2
16	map00590	Arachidonic acid metabolism		KEGG PATHWAY	16/2172	56/11318	0.0578622	0.237164	Metabolism	Lipid metabolism	gene1358|gene1359|gene1361|gene19950|gene12470|gene5015|gene197|gene20027|gene1356|gene1364|gene3225|gene5990|gene11513|gene1360|gene3517|gene1362	LOC106042968;LOC106042978;LOC106043002;LOC106049439;HPGDS;GPX7;LOC106034197;EPHX2;PLA2G4F;LOC106040722;TBXAS1;PTGS2;LOC106040243;LOC106042985;GGT1;LOC106042972
10	map00591	Linoleic acid metabolism		KEGG PATHWAY	10/2172	31/11318	0.0586596	0.2375	Metabolism	Lipid metabolism	gene1358|gene1359|gene1360|gene1361|gene197|gene4186|gene1356|gene1362|gene11513|gene1364	LOC106042968;LOC106042978;LOC106042985;LOC106043002;LOC106034197;LOC106032071;PLA2G4F;LOC106042972;LOC106040243;LOC106040722
10	map00512	Mucin type O-glycan biosynthesis		KEGG PATHWAY	10/2172	31/11318	0.0586596	0.2375	Metabolism	Glycan biosynthesis and metabolism	gene1204|gene6638|gene15423|gene19260|gene19356|gene2177|gene3782|gene13994|gene13993|gene16269	B4GALT5;ST6GALNAC1;GCNT1;PIK3AP160;GALNT2;GALNT3;GALNT16;LOC106042924;GCNT4;TNFRSF13C9
13	map05219	Bladder cancer		KEGG PATHWAY	13/2172	44/11318	0.0651064	0.257325	Human Diseases	Cancer: specific types	gene16236|gene14183|gene19020|gene5711|gene13840|gene9948|gene17323|gene530|gene16021|gene17324|gene17850|gene12197|gene18392	DAPK1;MMP2;LOC10602987820;DAPK2;HBEGF;MYC;LOC106046592;FGFR3;LOC106045119;LOC106046593;MMP9;SRC;PSD92
6	map00120	Primary bile acid biosynthesis		KEGG PATHWAY	6/2172	16/11318	0.0688602	0.26896	Metabolism	Lipid metabolism	gene7215|gene18932|gene18879|gene10519|gene120|gene9710	ACOX2;HSD17B4;LOC106048282;LOC106039057;CH25H;LOC106038153
26	map04625	C-type lectin receptor signaling pathway		KEGG PATHWAY	26/2172	102/11318	0.0707472	0.269978	Organismal Systems	Immune system	gene16487|gene15614|gene13304|gene4965|gene2407|gene11964|gene12305|gene5078|gene20213|gene17769|gene17768|gene10253|gene16188|gene12557|gene16004|gene12197|gene5106|gene4749|gene15263|gene10183|gene208|gene184|gene1227|gene5182|gene5990|gene11333	LOC106045683;LOC106044678;LOC106042201;JUN;IL6;CARD9;LOC106041090;PIK3R3;IL1B;LOC106047052;LOC106047050;NFKBIA;NFKB1;IKBKE;SYK;SRC;PLK3;IRF1;LOC106044308;LOC106038708;LOC106030078;NFKB2;NFATC2;LOC106033293;PTGS2;STAT1
28	map04666	Fc gamma R-mediated phagocytosis		KEGG PATHWAY	28/2172	111/11318	0.0700249	0.270329	Organismal Systems	Immune system	gene11987|gene3545|gene14267|gene5078|gene1358|gene1359|gene7610|gene14041|gene9470|gene6216|gene14042|gene17812|gene1356|gene9061|gene20397|gene19959|gene20398|gene20399|gene16004|gene12312|gene1361|gene1360|gene1362|gene1364|gene13131|gene16801|gene11669|gene10022	GSN;LIMK2;LOC106043193;PIK3R3;LOC106042968;LOC106042978;BLNK10;CHST11;MARCKSL1;DOCK2;CHST12;HCK;PLA2G4F;SCIN;LOC106049912;LOC106049445;LOC106049913;LOC106049914;SYK;LIMK1;LOC106043002;LOC106042985;LOC106042972;LOC106040722;PTPRC;PRKCB;INPP5D;LOC106038521
19	map04664	Fc epsilon RI signaling pathway		KEGG PATHWAY	19/2172	71/11318	0.0742739	0.277067	Organismal Systems	Immune system	gene1358|gene20397|gene7610|gene1364|gene6211|gene20399|gene20398|gene1359|gene4218|gene1361|gene9293|gene1362|gene1356|gene19959|gene11669|gene12380|gene1360|gene16004|gene5078	LOC106042968;LOC106049912;BLNK10;LOC106040722;LCP2;LOC106049914;LOC106049913;LOC106042978;MAP2K3;LOC106043002;GPR1613;LOC106042972;PLA2G4F;LOC106049445;INPP5D;ALOX5AP;LOC106042985;SYK;PIK3R3
27	map05145	Toxoplasmosis		KEGG PATHWAY	27/2172	107/11318	0.0739112	0.278847	Human Diseases	Infectious disease: parasitic	gene11193|gene12437|gene14465|gene13591|gene4218|gene17853|gene2836|gene6988|gene10253|gene20823|gene16188|gene12442|gene11109|gene13160|gene9869|gene20840|gene9870|gene4601|gene4508|gene208|gene10080|gene14137|gene20407|gene20405|gene12533|gene8833|gene11333	IL10RA;CIITA;IL10RB;LAMC2;MAP2K3;CD40;LY96;CASP3;NFKBIA;LOC10603007823;NFKB1;SOCS1;HSPA8;LAMB1;LOC106038356;LOC10603007840;LOC106038357;LAMA4;LAMA2;LOC106030078;XIAP;GNAO1;LOC106049920;LOC106049922;LAMB3;HSPA2;STAT1
15	map04913	Ovarian steroidogenesis		KEGG PATHWAY	15/2172	54/11318	0.0801599	0.295701	Organismal Systems	Endocrine system	gene15194|gene15854|gene1361|gene1364|gene1360|gene1359|gene1356|gene1358|gene2105|gene1362|gene5990|gene7519|gene10970|gene1336|gene14211	LOC106044188;INSR;LOC106043002;LOC106040722;LOC106042985;LOC106042978;PLA2G4F;LOC106042968;ADCY5;LOC106042972;PTGS2;IGF1;ADCY7;LOC106042682;LHCGR
14	map05204	Chemical carcinogenesis		KEGG PATHWAY	14/2172	50/11318	0.0841436	0.297188	Human Diseases	Cancer: overview	gene15194|gene2666|gene2668|gene12470|gene197|gene2665|gene20702|gene4186|gene18846|gene12531|gene5990|gene14975|gene5961|gene3090	LOC106044188;LOC106030436;LOC106030437;HPGDS;LOC106034197;LOC106030435;LOC106029567;LOC106032071;LOC106048260;LOC106041294;PTGS2;LOC1060444515;CCBL2;MGST1
23	map04650	Natural killer cell mediated cytotoxicity		KEGG PATHWAY	23/2172	90/11318	0.083287	0.297326	Organismal Systems	Immune system	gene20542|gene4107|gene5078|gene6988|gene6211|gene7610|gene20029|gene20397|gene10078|gene19959|gene20398|gene20399|gene19721|gene16004|gene20201|gene1052|gene18968|gene15263|gene9468|gene1227|gene16801|gene18465|gene2370	PRF1;TNFSF10;PIK3R3;CASP3;LCP2;BLNK10;PTK2B;LOC106049912;SH2D1A;LOC106049445;LOC106049913;LOC106049914;LOC10603419721;SYK;TNFRSF10B;CD247;ZAP70;LOC106044308;LCK;NFATC2;PRKCB;NFKB265;ITGB2
36	map05226	Gastric cancer		KEGG PATHWAY	36/2172	150/11318	0.0831651	0.300117	Human Diseases	Cancer: specific types	gene12283|gene8973|gene3401|gene18661|gene11436|gene2720|gene19671|gene5078|gene13515|gene4772|gene7321|gene18243|gene4032|gene9948|gene10796|gene10798|gene7975|gene17397|gene10159|gene13212|gene16898|gene13562|gene2120|gene8439|gene11699|gene18392|gene16021|gene2519|gene17618|gene12815|gene9629|gene19020|gene2357|gene11073|gene17324|gene17323	FZD9;FGF13;FZD10;FZD4;WNT7A;CCNE2;WNT4;PIK3R3;WNT11;HPSE272;HGF;FGF12;TCF7L2;MYC;WNT10A;WNT6;FGF10;GAB1;LEF1;CXCL1212;BAK1;PLA2G4F2;LOC106029911;WNT3A;FGF9;PSD92;LOC106045119;RARB;FZD2;RXRG;FZD3;LOC10602987820;FZD7;FZD1;LOC106046593;LOC106046592
11	map00982	Drug metabolism - cytochrome P450		KEGG PATHWAY	11/2172	37/11318	0.0824074	0.300651	Metabolism	Xenobiotics biodegradation and metabolism	gene12803|gene12802|gene2666|gene2668|gene12470|gene2665|gene20702|gene12780|gene18846|gene14975|gene3090	FMO3;LOC106041532;LOC106030436;LOC106030437;HPGDS;LOC106030435;LOC106029567;LOC106041531;LOC106048260;LOC1060444515;MGST1
8	map00040	Pentose and glucuronate interconversions		KEGG PATHWAY	8/2172	25/11318	0.089828	0.313925	Metabolism	Carbohydrate metabolism	gene16452|gene8506|gene18098|gene14975|gene3103|gene9051|gene3107|gene10570	UGP2;XYLB;SORD;LOC1060444515;LOC106030914;ISPD;LOC106030918;UGDH
15	map05134	Legionellosis		KEGG PATHWAY	15/2172	55/11318	0.0915105	0.316474	Human Diseases	Infectious disease: bacterial	gene20213|gene6988|gene11359|gene11169|gene10253|gene20823|gene20146|gene2407|gene12772|gene12305|gene16188|gene8833|gene2370|gene11109|gene184	IL1B;CASP3;HSPD1;IL18;NFKBIA;LOC10603007823;LOC106049641;IL6;SEC22B;LOC106041090;NFKB1;HSPA2;ITGB2;HSPA8;NFKB2
12	map00071	Fatty acid degradation		KEGG PATHWAY	12/2172	42/11318	0.0924775	0.316521	Metabolism	Lipid metabolism	gene8482|gene4029|gene10056|gene20702|gene16586|gene16587|gene3295|gene6985|gene20768|gene18977|gene10595|gene576	ACAA1;ACSL5;ACSL4;LOC106029567;LOC106045763;LOC106045817;ALDH2;ACSL1;LOC106029637;ACSBG2;EHHADH;ACOX3
2	map00780	Biotin metabolism		KEGG PATHWAY	2/2172	3/11318	0.0963241	0.323026	Metabolism	Metabolism of cofactors and vitamins	gene7855|gene2523	HLCS;OXSM
39	map05152	Tuberculosis		KEGG PATHWAY	39/2172	166/11318	0.0956951	0.324192	Human Diseases	Infectious disease: bacterial	gene11359|gene16487|gene20397|gene12437|gene2407|gene3373|gene11964|gene14465|gene11193|gene2765|gene20082|gene6988|gene20213|gene11169|gene11333|gene4855|gene15614|gene20146|gene8543|gene16188|gene10561|gene2574|gene16893|gene2571|gene2573|gene20823|gene20398|gene20399|gene20840|gene16758|gene16004|gene12197|gene5106|gene10183|gene20407|gene11888|gene20405|gene8347|gene2370	HSPD1;LOC106045683;LOC106049912;CIITA;IL6;TCTN2;CARD9;IL10RB;IL10RA;RIPK2;VDR;CASP3;IL1B;IL18;STAT1;CD74;LOC106044678;LOC106049641;EEA1;NFKB1;LOC106039090;LOC106030346;NFYA;LOC106030345;LOC106030347;LOC10603007823;LOC106049913;LOC106049914;LOC10603007840;MRC2;SYK;SRC;PLK3;LOC106038708;LOC106049920;TIRAP;LOC106049922;IRAK2;ITGB2
37	map05164	Influenza A		KEGG PATHWAY	37/2172	157/11318	0.0988545	0.328197	Human Diseases	Infectious disease: viral	gene12292|gene17471|gene19495|gene12437|gene2407|gene1969|gene12305|gene3889|gene5078|gene6988|gene15178|gene20213|gene17769|gene17768|gene10253|gene6479|gene16188|gene13649|gene17686|gene16645|gene11576|gene16898|gene20840|gene12557|gene19934|gene11169|gene20201|gene208|gene8304|gene5182|gene5185|gene20407|gene16801|gene20405|gene11333|gene7825|gene4107	LOC106041040;SOCS3;RAB25;CIITA;IL6;EIF2AK2;LOC106041090;IRF7;PIK3R3;CASP3;PML;IL1B;LOC106047052;LOC106047050;NFKBIA;PROM19;NFKB1;LOC1060407229;TRAF3;CCND3;DDX58;BAK1;LOC10603007840;IKBKE;LOC106049424;IL18;TNFRSF10B;LOC106030078;XPO1;LOC106033293;LOC106033294;LOC106049920;PRKCB;LOC106049922;STAT1;LOC106036132;TNFSF10
9	map01523	Antifolate resistance		KEGG PATHWAY	9/2172	30/11318	0.105132	0.338871	Human Diseases	Drug resistance: antineoplastic	gene20213|gene19688|gene208|gene170|gene4250|gene19904|gene2407|gene16188|gene11553	IL1B;SLC46A1;LOC106030078;LOC106049164;SHMT1;TJAP14;IL6;NFKB1;MTHFR
29	map04270	Vascular smooth muscle contraction		KEGG PATHWAY	29/2172	120/11318	0.103322	0.339632	Organismal Systems	Circulatory system	gene15614|gene4367|gene16609|gene1359|gene6455|gene1356|gene17316|gene7870|gene11550|gene19283|gene1358|gene8803|gene16801|gene12131|gene11513|gene2105|gene15538|gene10996|gene1364|gene1361|gene1360|gene1362|gene16293|gene4315|gene10183|gene10220|gene19518|gene12162|gene10970	LOC106044678;GUCY1A3;ADORA2B;LOC106042978;GNA13;PLA2G4F;EDN2;AGTR1;NPPC;PIK3AP183;LOC106042968;PRKCH;PRKCB;EDN3;LOC106040243;ADCY5;AGT;MYLK3;LOC106040722;LOC106043002;LOC106042985;LOC106042972;MYL9;EDNRA;LOC106038708;PRKCQ;MYLK4;ADM;ADCY7
29	map04670	Leukocyte transendothelial migration		KEGG PATHWAY	29/2172	120/11318	0.103322	0.339632	Organismal Systems	Immune system	gene19675|gene15614|gene10829|gene14183|gene12556|gene2296|gene12308|gene17850|gene5078|gene11132|gene7610|gene20029|gene7500|gene132|gene6138|gene3005|gene13588|gene10735|gene19959|gene19851|gene7598|gene11872|gene15263|gene16293|gene13288|gene3569|gene16801|gene4906|gene2370	CLDN19;LOC106044678;VCAM1;MMP2;RASSF5;ITGA4;LOC106041034;MMP9;PIK3R3;THY1;BLNK10;PTK2B;XG;CXCL12;CLDN20;TXK;LOC1060429688;CXCR4;LOC106049445;CLDN10;NCF4;ESAM;LOC106044308;MYL9;CXCL1288;PXN;PRKCB;ITK;ITGB2
33	map04550	Signaling pathways regulating pluripotency of stem cells		KEGG PATHWAY	33/2172	140/11318	0.113552	0.362494	Cellular Processes	Cellular community - eukaryotes	gene12283|gene19671|gene3401|gene15635|gene11436|gene19572|gene3603|gene8014|gene5078|gene13515|gene18816|gene4772|gene16449|gene9948|gene18661|gene14887|gene10796|gene10798|gene13212|gene13562|gene8439|gene9091|gene17618|gene7519|gene9629|gene8753|gene20014|gene2357|gene11073|gene530|gene11745|gene12896|gene12897	FZD9;WNT4;FZD10;MEIS1;WNT7A;LIF;TBX3;LIFR;PIK3R3;WNT11;LOC106048210;HPSE272;OTX1;MYC;FZD4;ACVR1C;WNT10A;WNT6;CXCL1212;PLA2G4F2;WNT3A;DLX5;FZD2;IGF1;FZD3;LOC106037140;FGFR4;FZD7;FZD1;FGFR3;KLF4;JARID2;LOC106041693
38	map05206	MicroRNAs in cancer		KEGG PATHWAY	38/2172	164/11318	0.115773	0.366062	Human Diseases	Cancer: overview	gene17512|gene4697|gene15614|gene2720|gene13751|gene15756|gene11909|gene7584|gene17850|gene5078|gene9552|gene16763|gene7933|gene9948|gene465|gene16188|gene8439|gene12442|gene18392|gene2265|gene6988|gene16801|gene16898|gene14662|gene16021|gene1496|gene7090|gene8680|gene1497|gene9629|gene4849|gene11327|gene19020|gene13916|gene16946|gene530|gene20501|gene5990	CDC25A;LOC106032718;LOC106044678;CCNE2;ZEB1;LOC1060458406;ST14;HMOX1;MMP9;PIK3R3;STMN1;ITGB3;IRS1;MYC;PLAU;NFKB1;WNT3A;SOCS1;PSD92;PAPSS25;CASP3;PRKCB;BAK1;KIF23;LOC106045119;CD44;ZFPM2;TNC;LOC106044451;FZD3;PDGFRB;SERPINB5;LOC10602987820;LOC106042836;LOC106046136;FGFR3;LOC106029353;PTGS2
14	map00600	Sphingolipid metabolism		KEGG PATHWAY	14/2172	53/11318	0.124046	0.388521	Metabolism	Lipid metabolism	gene190|gene15132|gene829|gene19078|gene230|gene18974|gene16929|gene10119|gene7964|gene10638|gene13528|gene8261|gene8160|gene15923	LOC106029878;ACER2;GALC;LOC10602987878;ASAH2;ACER1;SMPD2;UGT8;SGPP2;NEU4;ACER3;KCNK101;CERS3;LOC106044958
22	map05412	Arrhythmogenic right ventricular cardiomyopathy (ARVC)		KEGG PATHWAY	22/2172	90/11318	0.129142	0.400702	Human Diseases	Cardiovascular disease	gene3016|gene19493|gene2296|gene14670|gene2150|gene6607|gene4772|gene16763|gene7346|gene4032|gene9162|gene11690|gene9164|gene4899|gene10159|gene3172|gene3348|gene16418|gene4508|gene19308|gene6673|gene16803	SGCB;LMNA;ITGA4;ITGA11;ITGB6;ITGB4;HPSE272;ITGB3;ITGA2;TCF7L2;LOC106037565;SGCG;DSG2;SGCD;LEF1;PKP2;LOC106031415;SLC8A1;LAMA2;DAG1;DSP;CACNG3
38	map04390	Hippo signaling pathway		KEGG PATHWAY	38/2172	166/11318	0.132102	0.40609	Environmental Information Processing	Signal transduction	gene12009|gene7046|gene12662|gene3401|gene18661|gene13078|gene12283|gene19671|gene13515|gene16645|gene4772|gene1270|gene2646|gene4032|gene9948|gene2087|gene10796|gene10798|gene5195|gene14962|gene16183|gene11436|gene10159|gene13212|gene8920|gene2120|gene8439|gene16029|gene15511|gene9629|gene17618|gene1209|gene16477|gene2357|gene11073|gene17324|gene17323|gene2370	CRB2;STK3;YWHAG;FZD10;FZD4;AREG;FZD9;WNT4;WNT11;CCND3;HPSE272;BMP7;BMP5;TCF7L2;MYC;LOC1060300787;WNT10A;WNT6;PARD6A;MOB1B;PARD3;WNT7A;LEF1;CXCL1212;SMAD7;LOC106029911;WNT3A;LOC106045149;FRMD1;FZD3;FZD2;SNAI1;LOC106045698;FZD7;FZD1;LOC106046593;LOC106046592;ITGB2
12	map00520	Amino sugar and nucleotide sugar metabolism		KEGG PATHWAY	12/2172	45/11318	0.139479	0.420972	Metabolism	Carbohydrate metabolism	gene5831|gene12760|gene16641|gene16642|gene15045|gene16452|gene19453|gene4826|gene9725|gene1970|gene20011|gene10570	LOC106033848;UAP1;LOC106045866;LOC106045865;CAT5;UGP2;GCK;GFPT2;CMAS;LOC1060341970;LOC106049507;UGDH
14	map04923	Regulation of lipolysis in adipocytes		KEGG PATHWAY	14/2172	54/11318	0.139406	0.424613	Organismal Systems	Endocrine system	gene9602|gene15854|gene9769|gene3893|gene10970|gene7933|gene8086|gene4411|gene2105|gene5990|gene2802|gene16663|gene12192|gene5078	MGLL;INSR;LOC106038244;PNPLA2;ADCY7;IRS1;PLIN1;NPY1R;ADCY5;PTGS2;LOC106030656;ADORA1;PDE3B;PIK3R3
26	map05414	Dilated cardiomyopathy (DCM)		KEGG PATHWAY	26/2172	110/11318	0.14322	0.428369	Human Diseases	Cardiovascular disease	gene3016|gene20397|gene19493|gene4209|gene2296|gene14670|gene2150|gene6607|gene989|gene19308|gene7346|gene11690|gene3842|gene4899|gene3348|gene20398|gene20399|gene2105|gene15538|gene16418|gene4508|gene16763|gene7519|gene2286|gene16803|gene10970	SGCB;LOC106049912;LMNA;LOC106032083;ITGA4;ITGA11;ITGB6;ITGB4;MYH15;DAG1;ITGA2;SGCG;ACTC1;SGCD;LOC106031415;LOC106049913;LOC106049914;ADCY5;AGT;SLC8A1;LAMA2;ITGB3;IGF1;TTN;CACNG3;ADCY7
24	map04916	Melanogenesis		KEGG PATHWAY	24/2172	101/11318	0.148262	0.439491	Organismal Systems	Endocrine system	gene12283|gene19671|gene3401|gene18661|gene11436|gene13515|gene4772|gene2105|gene4032|gene18170|gene10796|gene10798|gene10159|gene13212|gene8439|gene10970|gene9629|gene17618|gene10183|gene14137|gene2357|gene11073|gene16801|gene1416	FZD9;WNT4;FZD10;FZD4;WNT7A;WNT11;HPSE272;ADCY5;TCF7L2;LOC106047519;WNT10A;WNT6;LEF1;CXCL1212;WNT3A;ADCY7;FZD3;FZD2;LOC106038708;GNAO1;FZD7;FZD1;PRKCB;CREB3L1
35	map05225	Hepatocellular carcinoma		KEGG PATHWAY	35/2172	154/11318	0.154094	0.452736	Human Diseases	Cancer: specific types	gene12283|gene19553|gene19671|gene3401|gene18661|gene11436|gene7584|gene5078|gene13515|gene4772|gene7321|gene4032|gene3090|gene9948|gene10796|gene10798|gene17334|gene18392|gene17031|gene2666|gene2668|gene10159|gene13212|gene2665|gene2120|gene8439|gene16021|gene9629|gene17618|gene19020|gene16898|gene2357|gene11073|gene16801|gene17397	FZD9;SMARCD3;WNT4;FZD10;FZD4;WNT7A;HMOX1;PIK3R3;WNT11;HPSE272;HGF;TCF7L2;MGST1;MYC;WNT10A;WNT6;NQO1;PSD92;TGFA;LOC106030436;LOC106030437;LEF1;CXCL1212;LOC106030435;LOC106029911;WNT3A;LOC106045119;FZD3;FZD2;LOC10602987820;BAK1;FZD7;FZD1;PRKCB;GAB1
12	map00480	Glutathione metabolism		KEGG PATHWAY	12/2172	46/11318	0.157556	0.454858	Metabolism	Metabolism of other amino acids	gene18788|gene5015|gene12470|gene1388|gene2665|gene2666|gene2935|gene16291|gene9371|gene3517|gene3090|gene2668	GPX4;GPX7;HPGDS;CHAC1;LOC106030435;LOC106030436;RRM2;GGT7;SMS;GGT1;MGST1;LOC106030437
10	map00980	Metabolism of xenobiotics by cytochrome P450		KEGG PATHWAY	10/2172	37/11318	0.157266	0.458003	Metabolism	Xenobiotics biodegradation and metabolism	gene15194|gene20702|gene2668|gene12470|gene2665|gene2666|gene18846|gene14975|gene12531|gene3090	LOC106044188;LOC106029567;LOC106030437;HPGDS;LOC106030435;LOC106030436;LOC106048260;LOC1060444515;LOC106041294;MGST1
2	map00524	Neomycin, kanamycin and gentamicin biosynthesis		KEGG PATHWAY	2/2172	4/11318	0.168469	0.482171	Metabolism	Biosynthesis of other secondary metabolites	gene20011|gene19453	LOC106049507;GCK
6	map00053	Ascorbate and aldarate metabolism		KEGG PATHWAY	6/2172	20/11318	0.169949	0.482247	Metabolism	Carbohydrate metabolism	gene16586|gene16587|gene3295|gene20768|gene14975|gene10570	LOC106045763;LOC106045817;ALDH2;LOC106029637;LOC1060444515;UGDH
8	map00790	Folate biosynthesis		KEGG PATHWAY	8/2172	29/11318	0.177855	0.500405	Metabolism	Metabolism of cofactors and vitamins	gene7523|gene15943|gene275|gene2036|gene15033|gene652|gene3103|gene3107	PAH;MOCOS;PCBD1;MOCS1;GCH1;QDPR;LOC106030914;LOC106030918
22	map04928	Parathyroid hormone synthesis, secretion and action		KEGG PATHWAY	22/2172	94/11318	0.179994	0.502169	Organismal Systems	Endocrine system	gene4693|gene15614|gene20082|gene14895|gene6455|gene13840|gene10230|gene695|gene19335|gene10970|gene7661|gene14604|gene12815|gene6562|gene2105|gene10304|gene19020|gene1416|gene18210|gene16801|gene6006|gene17531	EGR1;LOC106044678;VDR;NR4A2;GNA13;HBEGF;GATA3;SLC34A2;SOST;ADCY7;BLNK61;PDE4B;RXRG;LOC106034617;ADCY5;FOS;LOC10602987820;CREB3L1;MEF2C;PRKCB;EVC6;PTH1R
24	map04114	Oocyte meiosis		KEGG PATHWAY	24/2172	104/11318	0.186233	0.515244	Cellular Processes	Cell growth and death	gene18084|gene12662|gene2720|gene10599|gene6255|gene4697|gene13398|gene10098|gene16810|gene19433|gene3340|gene18515|gene2105|gene16393|gene7519|gene349|gene1261|gene10183|gene2496|gene20037|gene13228|gene5647|gene10970|gene5872	CPEB1;YWHAG;CCNE2;ANAPC13;PTTG1;LOC106032718;BUB1;MAD2L1;PLK1;LOC106048913;ANAPC5;RPS6KA1;ADCY5;AR;IGF1;CDK1;AURKA;LOC106038708;SGOL1;CCNB3;CXCL1228;CCNB2;ADCY7;CDC20
11	map05030	Cocaine addiction		KEGG PATHWAY	11/2172	43/11318	0.188693	0.517736	Human Diseases	Substance dependence	gene6456|gene4965|gene12427|gene2105|gene7661|gene16188|gene14089|gene20646|gene16119|gene1416|gene8728	RGS9;JUN;GRIN2A;ADCY5;BLNK61;NFKB1;GRIN3A;LOC106029507;SLC18A2;CREB3L1;GRIN1
15	map04370	VEGF signaling pathway		KEGG PATHWAY	15/2172	62/11318	0.197239	0.532384	Environmental Information Processing	Signal transduction	gene1361|gene1358|gene7610|gene1364|gene1359|gene5990|gene1356|gene3030|gene3569|gene1362|gene16801|gene1360|gene1227|gene5078|gene12197	LOC106043002;LOC106042968;BLNK10;LOC106040722;LOC106042978;PTGS2;PLA2G4F;KDR;PXN;LOC106042972;PRKCB;LOC106042985;NFATC2;PIK3R3;SRC
23	map00564	Glycerophospholipid metabolism		KEGG PATHWAY	23/2172	100/11318	0.197156	0.536523	Metabolism	Lipid metabolism	gene8850|gene3764|gene1358|gene1359|gene1356|gene11513|gene3538|gene16891|gene12296|gene1360|gene11578|gene2125|gene1362|gene18296|gene1361|gene16437|gene18766|gene20038|gene4234|gene1364|gene12594|gene18351|gene1417	HHEX50;LCLAT1;LOC106042968;LOC106042978;PLA2G4F;LOC106040243;PISD;CEPT1;LOC106041043;LOC106042985;DGKQ;LOC106029917;LOC106042972;CDS2;LOC106043002;GPCPD1;CDS1;LOC106049530;PEMT;LOC106040722;ETNK2;PSD51;DGKZ
33	map05224	Breast cancer		KEGG PATHWAY	33/2172	149/11318	0.204675	0.548001	Human Diseases	Cancer: specific types	gene12283|gene8973|gene3401|gene18661|gene11436|gene4965|gene2815|gene19671|gene5078|gene13515|gene4772|gene18243|gene4032|gene9948|gene8439|gene10798|gene7975|gene10159|gene13212|gene16898|gene13562|gene10796|gene11699|gene18392|gene16021|gene17618|gene7519|gene9629|gene184|gene10304|gene19020|gene2357|gene11073	FZD9;FGF13;FZD10;FZD4;WNT7A;JUN;HEY1;WNT4;PIK3R3;WNT11;HPSE272;FGF12;TCF7L2;MYC;WNT3A;WNT6;FGF10;LEF1;CXCL1212;BAK1;PLA2G4F2;WNT10A;FGF9;PSD92;LOC106045119;FZD2;IGF1;FZD3;NFKB2;FOS;LOC10602987820;FZD7;FZD1
14	map00280	Valine, leucine and isoleucine degradation		KEGG PATHWAY	14/2172	58/11318	0.210388	0.55879	Metabolism	Amino acid metabolism	gene20429|gene19149|gene17252|gene16324|gene16586|gene16587|gene3295|gene2647|gene4151|gene20768|gene10588|gene14619|gene10595|gene8482	IL4I1;BCKDHB;ACSF3;BCAT1;LOC106045763;LOC106045817;ALDH2;HMGCLL1;MCCC1;LOC106029637;PCCB;LOC106043624;EHHADH;ACAA1
5	map00910	Nitrogen metabolism		KEGG PATHWAY	5/2172	17/11318	0.214695	0.565705	Metabolism	Energy metabolism	gene8061|gene8697|gene17235|gene17556|gene10501	CA9;LOC106037044;SCD35;CA4;CA8
2	map00400	Phenylalanine, tyrosine and tryptophan biosynthesis		KEGG PATHWAY	2/2172	5/11318	0.246213	0.579736	Metabolism	Amino acid metabolism	gene20429|gene7523	IL4I1;PAH
7	map00601	Glycosphingolipid biosynthesis - lacto and neolacto series		KEGG PATHWAY	7/2172	27/11318	0.250105	0.580664	Metabolism	Glycan biosynthesis and metabolism	gene9722|gene8754|gene6041|gene9754|gene3320|gene4154|gene862	ST8SIA1;FUT7;FUT4;A4GALT;B3GNT4;B3GNT5;B4GALT4
35	map05161	Hepatitis B		KEGG PATHWAY	35/2172	162/11318	0.243202	0.580884	Human Diseases	Infectious disease: viral	gene13264|gene13265|gene13574|gene2720|gene4965|gene2407|gene17850|gene5078|gene18816|gene3889|gene20029|gene10253|gene9948|gene16188|gene17686|gene6988|gene11576|gene11888|gene20823|gene2120|gene7661|gene12557|gene16021|gene3774|gene12197|gene18392|gene208|gene10304|gene19020|gene4218|gene1227|gene16801|gene11335|gene1416|gene11333	CXCL1264;CXCL1265;CCNA2;CCNE2;JUN;IL6;MMP9;PIK3R3;LOC106048210;IRF7;PTK2B;NFKBIA;MYC;NFKB1;TRAF3;CASP3;DDX58;TIRAP;LOC10603007823;LOC106029911;BLNK61;IKBKE;LOC106045119;SLC10A1;SRC;PSD92;LOC106030078;FOS;LOC10602987820;MAP2K3;NFATC2;PRKCB;STAT4;CREB3L1;STAT1
19	map04912	GnRH signaling pathway		KEGG PATHWAY	19/2172	84/11318	0.249037	0.582256	Organismal Systems	Endocrine system	gene1358|gene4693|gene1361|gene20029|gene1359|gene1360|gene14183|gene4965|gene1356|gene13840|gene2105|gene7661|gene4218|gene16801|gene1362|gene10970|gene10183|gene12197|gene1364	LOC106042968;EGR1;LOC106043002;PTK2B;LOC106042978;LOC106042985;MMP2;JUN;PLA2G4F;HBEGF;ADCY5;BLNK61;MAP2K3;PRKCB;LOC106042972;ADCY7;LOC106038708;SRC;LOC106040722
18	map05120	Epithelial cell signaling in Helicobacter pylori infection		KEGG PATHWAY	18/2172	79/11318	0.246177	0.583792	Human Diseases	Infectious disease: bacterial	gene12292|gene5643|gene6988|gene2944|gene15479|gene10253|gene14247|gene8686|gene4965|gene3373|gene13840|gene208|gene5182|gene5185|gene16188|gene16692|gene12197|gene15263	LOC106041040;ADAM10;CASP3;ATP6V1C2;PTPRZ1;NFKBIA;ATP6V1B1;ATP6V1G1;JUN;TCTN2;HBEGF;LOC106030078;LOC106033293;LOC106033294;NFKB1;LOC106045913;SRC;LOC106044308
5	map00450	Selenocompound metabolism		KEGG PATHWAY	5/2172	18/11318	0.253528	0.584522	Metabolism	Metabolism of other amino acids	gene1888|gene226|gene691|gene5961|gene3445	MTR;PAPSS2;SEPSECS;CCBL2;TXNRD2
9	map00250	Alanine, aspartate and glutamate metabolism		KEGG PATHWAY	9/2172	36/11318	0.242563	0.587816	Metabolism	Amino acid metabolism	gene20429|gene15059|gene4620|gene8697|gene4826|gene6070|gene948|gene9085|gene538	IL4I1;ASS1;DDO;LOC106037044;GFPT2;LOC106034162;NIT2;ASNS;NAT8L
9	map00410	beta-Alanine metabolism		KEGG PATHWAY	9/2172	36/11318	0.242563	0.587816	Metabolism	Metabolism of other amino acids	gene14372|gene16586|gene16587|gene3295|gene18846|gene20768|gene3521|gene10595|gene576	GADL1;LOC106045763;LOC106045817;ALDH2;LOC106048260;LOC106029637;UPB1;EHHADH;ACOX3
23	map05410	Hypertrophic cardiomyopathy (HCM)		KEGG PATHWAY	23/2172	103/11318	0.241833	0.590357	Human Diseases	Cardiovascular disease	gene3016|gene19493|gene2407|gene4209|gene2296|gene14670|gene2150|gene6607|gene989|gene19308|gene7346|gene11690|gene3842|gene4899|gene4973|gene3348|gene2286|gene15538|gene16418|gene4508|gene16763|gene7519|gene16803	SGCB;LMNA;IL6;LOC106032083;ITGA4;ITGA11;ITGB6;ITGB4;MYH15;DAG1;ITGA2;SGCG;ACTC1;SGCD;PRKAA2;LOC106031415;TTN;AGT;SLC8A1;LAMA2;ITGB3;IGF1;CACNG3
4	map00603	Glycosphingolipid biosynthesis - globo and isoglobo series		KEGG PATHWAY	4/2172	13/11318	0.228128	0.591706	Metabolism	Glycan biosynthesis and metabolism	gene9754|gene9722|gene15095|gene16269	A4GALT;ST8SIA1;GBGT1;TNFRSF13C9
23	map04933	AGE-RAGE signaling pathway in diabetic complications		KEGG PATHWAY	23/2172	102/11318	0.226474	0.592043	Human Diseases	Endocrine and metabolic disease	gene4693|gene10808|gene8965|gene10829|gene14183|gene4965|gene2407|gene9326|gene10862|gene5078|gene6988|gene16188|gene7870|gene20213|gene2120|gene10062|gene15538|gene12814|gene13288|gene13386|gene16946|gene16801|gene11333	EGR1;PLCD4;NOX1;VCAM1;MMP2;JUN;IL6;FIGF;F3;PIK3R3;CASP3;NFKB1;AGTR1;IL1B;LOC106029911;COL4A6;AGT;LOC106041602;CXCL1288;THBD;LOC106046136;PRKCB;STAT1
16	map05218	Melanoma		KEGG PATHWAY	16/2172	70/11318	0.258614	0.592137	Human Diseases	Cancer: specific types	gene7519|gene8973|gene4849|gene7321|gene16898|gene13562|gene19020|gene18243|gene6002|gene11699|gene16021|gene17324|gene7975|gene5078|gene17323|gene18392	IGF1;FGF13;PDGFRB;HGF;BAK1;PLA2G4F2;LOC10602987820;FGF12;EVC2;FGF9;LOC106045119;LOC106046593;FGF10;PIK3R3;LOC106046592;PSD92
46	map04810	Regulation of actin cytoskeleton		KEGG PATHWAY	46/2172	216/11318	0.237361	0.59251	Cellular Processes	Cell motility	gene11987|gene19498|gene8973|gene10674|gene15614|gene2296|gene14670|gene2150|gene5078|gene6607|gene6455|gene16763|gene7346|gene19987|gene16625|gene20236|gene10996|gene132|gene6379|gene3545|gene20652|gene7975|gene10440|gene9061|gene13258|gene18243|gene13562|gene10735|gene19959|gene7610|gene11699|gene12312|gene12197|gene14052|gene16293|gene4849|gene14118|gene12965|gene3569|gene20014|gene6002|gene19…	GSN;LOC106048962;FGF13;ARHGEF4;LOC106044678;ITGA4;ITGA11;ITGB6;PIK3R3;ITGB4;GNA13;ITGB3;ITGA2;LPAR2;SSH2;INSRR;MYLK3;CXCL12;NCKAP1;LIMK2;LOC106029514;FGF10;DOCK1;SCIN;CXCL1258;FGF12;PLA2G4F2;CXCR4;LOC106049445;BLNK10;FGF9;LIMK1;SRC;LPAR4;MYL9;PDGFRB;LPAR1;DIAPH3;PXN;FGFR4;EVC2;MYLK4;FGFR3;LPAR5;CYFIP2;ITGB2
14	map05031	Amphetamine addiction		KEGG PATHWAY	14/2172	59/11318	0.230274	0.592644	Human Diseases	Substance dependence	gene10183|gene4881|gene13457|gene4965|gene12427|gene1416|gene2105|gene7661|gene16801|gene14089|gene20646|gene16119|gene10304|gene8728	LOC106038708;GRIA1;CAMK4;JUN;GRIN2A;CREB3L1;ADCY5;BLNK61;PRKCB;GRIN3A;LOC106029507;SLC18A2;FOS;GRIN1
16	map05221	Acute myeloid leukemia		KEGG PATHWAY	16/2172	69/11318	0.239269	0.592815	Human Diseases	Cancer: specific types	gene208|gene16925|gene15178|gene4772|gene10159|gene13574|gene14438|gene4032|gene20146|gene14384|gene2746|gene9948|gene16946|gene16188|gene1439|gene5078	LOC106030078;PPARD;PML;HPSE272;LEF1;CCNA2;RUNX1;TCF7L2;LOC106049641;BCL2A1;RUNX1T1;MYC;LOC106046136;NFKB1;SPI1;PIK3R3
33	map04934	Cushing syndrome		KEGG PATHWAY	33/2172	152/11318	0.241543	0.594016	Human Diseases	Endocrine and metabolic disease	gene12283|gene19671|gene10740|gene3401|gene18661|gene11436|gene2720|gene4109|gene5032|gene13515|gene4772|gene8472|gene4032|gene18365|gene8439|gene10798|gene18392|gene10159|gene13212|gene7870|gene10970|gene15538|gene7661|gene4257|gene16021|gene9629|gene17618|gene2105|gene19020|gene10796|gene2357|gene11073|gene1416	FZD9;WNT4;LOC106039340;FZD10;FZD4;WNT7A;CCNE2;NCEH1;CDKN2C;WNT11;HPSE272;CRHR2;TCF7L2;PSD65;WNT3A;WNT6;PSD92;LEF1;CXCL1212;AGTR1;ADCY7;AGT;BLNK61;CACNA1H;LOC106045119;FZD3;FZD2;ADCY5;LOC10602987820;WNT10A;FZD7;FZD1;CREB3L1
6	map00531	Glycosaminoglycan degradation		KEGG PATHWAY	6/2172	22/11318	0.235266	0.596245	Metabolism	Glycan biosynthesis and metabolism	gene47|gene9245|gene13912|gene11773|gene13027|gene6928	HPSE2;IDS;LOC106042799;IDUA;HPSE;HGSNAT
21	map03320	PPAR signaling pathway		KEGG PATHWAY	21/2172	93/11318	0.237331	0.596924	Organismal Systems	Endocrine system	gene12815|gene7215|gene20117|gene8482|gene4029|gene10056|gene20702|gene172|gene6985|gene18977|gene16053|gene2804|gene7318|gene8086|gene20844|gene2802|gene16925|gene11205|gene10595|gene18929|gene576	RXRG;ACOX2;LOC106049619;ACAA1;ACSL5;ACSL4;LOC106029567;SCD;ACSL1;ACSBG2;FABP3;FABP5;CD36;PLIN1;LOC106029718;LOC106030656;PPARD;LOC106039769;EHHADH;PLIN2;ACOX3
15	map04924	Renin secretion		KEGG PATHWAY	15/2172	64/11318	0.235078	0.600354	Organismal Systems	Endocrine system	gene16349|gene4315|gene12131|gene10183|gene15538|gene12593|gene2105|gene17316|gene5949|gene4367|gene7870|gene16663|gene8006|gene12192|gene5948	PDE1C;EDNRA;EDN3;LOC106038708;AGT;REN;ADCY5;EDN2;LOC106034007;GUCY1A3;AGTR1;ADORA1;PTGER4;PDE3B;LOC106034001
46	map04510	Focal adhesion		KEGG PATHWAY	46/2172	220/11318	0.28142	0.639942	Cellular Processes	Cellular community - eukaryotes	gene13591|gene15614|gene10062|gene5700|gene2296|gene9326|gene14670|gene20084|gene2150|gene5078|gene6607|gene7610|gene16763|gene7321|gene7346|gene9570|gene16645|gene4508|gene10440|gene18555|gene8680|gene6553|gene17377|gene13160|gene7292|gene4965|gene16801|gene15519|gene3030|gene4601|gene10996|gene19080|gene7519|gene12197|gene16293|gene4849|gene9772|gene19217|gene19456|gene10080|gene3569|gene6002|g…	LAMC2;LOC106044678;COL4A6;TLN2;ITGA4;FIGF;ITGA11;COL2A1;ITGB6;PIK3R3;ITGB4;BLNK10;ITGB3;HGF;ITGA2;FLNB;CCND3;LAMA2;DOCK1;COMP;TNC;CHAD;COL6A6;LAMB1;RELN;JUN;PRKCB;THBS2;KDR;LAMA4;MYLK3;LOC10602987880;IGF1;SRC;MYL9;PDGFRB;PARVB;RASGRF1;FLNC;XIAP;PXN;EVC2;MYLK4;LOC106049445;EIF2AK20;LAMB3
12	map05014	Amyotrophic lateral sclerosis (ALS)		KEGG PATHWAY	12/2172	52/11318	0.287063	0.648333	Human Diseases	Neurodegenerative disease	gene6988|gene11543|gene5015|gene4218|gene4881|gene19389|gene19388|gene12427|gene12305|gene2359|gene8728|gene1504	CASP3;TNFRSF1B;GPX7;MAP2K3;GRIA1;NEFL;NEFM;GRIN2A;LOC106041090;ALS2;GRIN1;CAT
11	map00330	Arginine and proline metabolism		KEGG PATHWAY	11/2172	48/11318	0.307885	0.686025	Metabolism	Amino acid metabolism	gene9371|gene18134|gene3800|gene16586|gene16587|gene3295|gene20768|gene9378|gene13830|gene19195|gene4615	SMS;LOC106047481;ARG2;LOC106045763;LOC106045817;ALDH2;LOC106029637;SAT1;CKMT2;LOC106048637;AMD1
6	map04614	Renin-angiotensin system		KEGG PATHWAY	6/2172	24/11318	0.306754	0.688124	Organismal Systems	Endocrine system	gene18649|gene20455|gene9021|gene12593|gene15538|gene7870	PRCP;LOC106029317;AGTR2;REN;AGT;AGTR1
22	map04726	Serotonergic synapse		KEGG PATHWAY	22/2172	103/11318	0.324187	0.708092	Organismal Systems	Nervous system	gene7410|gene16119|gene1358|gene1359|gene197|gene1356|gene6988|gene16801|gene6855|gene15729|gene2105|gene6247|gene15470|gene1361|gene1360|gene1362|gene1619|gene1364|gene14137|gene10346|gene5990|gene13852	HTR1A;SLC18A2;LOC106042968;LOC106042978;LOC106034197;PLA2G4F;CASP3;PRKCB;HTR2A;HTR2B;ADCY5;GABRB2;KCND2;LOC106043002;LOC106042985;LOC106042972;LOC106046243;LOC106040722;GNAO1;HTR5A;PTGS2;DUSP1
31	map04150	mTOR signaling pathway		KEGG PATHWAY	31/2172	148/11318	0.323654	0.711609	Environmental Information Processing	Signal transduction	gene15854|gene12283|gene11315|gene19671|gene3401|gene18661|gene11436|gene9991|gene8686|gene5078|gene13515|gene16588|gene14247|gene7933|gene15614|gene8439|gene10798|gene3414|gene13212|gene4973|gene18515|gene10796|gene17618|gene7519|gene2944|gene9629|gene208|gene2357|gene11073|gene12086|gene16801	INSR;FZD9;RNF152;WNT4;FZD10;FZD4;WNT7A;DEPTOR;ATP6V1G1;PIK3R3;WNT11;ULK2;ATP6V1B1;IRS1;LOC106044678;WNT3A;WNT6;ULK1;CXCL1212;PRKAA2;RPS6KA1;WNT10A;FZD2;IGF1;ATP6V1C2;FZD3;LOC106030078;FZD7;FZD1;LOC106040774;PRKCB
19	map04610	Complement and coagulation cascades		KEGG PATHWAY	19/2172	88/11318	0.322746	0.714345	Organismal Systems	Immune system	gene5733|gene11570|gene11984|gene20338|gene15338|gene18698|gene19690|gene6683|gene465|gene18460|gene13386|gene19513|gene17170|gene10862|gene13258|gene19609|gene3476|gene12732|gene2370	SERPING1;STK40;C5;LOC106049849;PLAT;LOC106048077;EIF2AK20;F13A1;PLAU;NFKB260;THBD;LOC106048983;F10;F3;CXCL1258;LOC106049106;SERPIND1;CFH;ITGB2
10	map00380	Tryptophan metabolism		KEGG PATHWAY	10/2172	44/11318	0.330936	0.71811	Metabolism	Amino acid metabolism	gene15194|gene10747|gene5961|gene20429|gene16586|gene16587|gene3295|gene20768|gene1504|gene10595	LOC106044188;ACMSD;CCBL2;IL4I1;LOC106045763;LOC106045817;ALDH2;LOC106029637;CAT;EHHADH
31	map04218	Cellular senescence		KEGG PATHWAY	31/2172	149/11318	0.338509	0.725064	Cellular Processes	Cell growth and death	gene17512|gene5647|gene13574|gene19020|gene14429|gene2720|gene2407|gene12556|gene4218|gene5078|gene5173|gene16645|gene20337|gene9948|gene16188|gene11894|gene3255|gene2120|gene4637|gene16021|gene18392|gene349|gene10183|gene7841|gene20037|gene18740|gene1227|gene13228|gene20644|gene3789|gene11883	CDC25A;CCNB2;CCNA2;LOC10602987820;LOC106043382;CCNE2;IL6;RASSF5;MAP2K3;PIK3R3;E2F4;CCND3;LOC106049848;MYC;NFKB1;ETS1;TRPV4;LOC106029911;FOXO3;LOC106045119;PSD92;CDK1;LOC106038708;ETS2;CCNB3;FOXM1;NFATC2;CXCL1228;LOC106029505;ZFP36L1;CHEK1
13	map00983	Drug metabolism - other enzymes		KEGG PATHWAY	13/2172	59/11318	0.337794	0.728231	Metabolism	Xenobiotics biodegradation and metabolism	gene2668|gene5258|gene8212|gene17473|gene2666|gene18422|gene2935|gene2665|gene3521|gene14975|gene12882|gene12063|gene3090	LOC106030437;LOC106033238;UPP1;TK1;LOC106030436;NFKB222;RRM2;LOC106030435;UPB1;LOC1060444515;TPMT;UCKL1;MGST1
1	map00785	Lipoic acid metabolism		KEGG PATHWAY	1/2172	2/11318	0.346999	0.738485	Metabolism	Metabolism of cofactors and vitamins	gene10569	LIAS
1	map00660	C5-Branched dibasic acid metabolism		KEGG PATHWAY	1/2172	2/11318	0.346999	0.738485	Metabolism	Carbohydrate metabolism	gene14921	IRG1
3	map00072	Synthesis and degradation of ketone bodies		KEGG PATHWAY	3/2172	11/11318	0.35572	0.747463	Metabolism	Lipid metabolism	gene2647|gene10701|gene16193	HMGCLL1;BDH1;BDH2
30	map04210	Apoptosis		KEGG PATHWAY	30/2172	146/11318	0.369822	0.772207	Cellular Processes	Cell growth and death	gene14409|gene19493|gene4965|gene11989|gene16684|gene20089|gene11983|gene5078|gene6988|gene17954|gene8056|gene10253|gene8744|gene14384|gene16188|gene19789|gene16898|gene20542|gene7661|gene7599|gene6488|gene20201|gene208|gene10304|gene10080|gene16458|gene15892|gene20501|gene11741|gene4107	LOC106043362;LMNA;JUN;DAB2IP;LOC106045884;DDIT3;TRAF1;PIK3R3;CASP3;ENDOG;PMAIP1;NFKBIA;TRAF2;BCL2A1;NFKB1;LOC10603419789;BAK1;PRF1;BLNK61;LOC106035885;ERN1;TNFRSF10B;LOC106030078;FOS;XIAP;LMNB2;LOC106044971;LOC106029353;LMNB1;TNFSF10
14	map01524	Platinum drug resistance		KEGG PATHWAY	14/2172	66/11318	0.385546	0.780495	Human Diseases	Drug resistance: antineoplastic	gene6988|gene2668|gene8056|gene11583|gene2666|gene19020|gene10080|gene5078|gene16898|gene2665|gene6815|gene1996|gene20078|gene3090	CASP3;LOC106030437;PMAIP1;XPA;LOC106030436;LOC10602987820;XIAP;PIK3R3;BAK1;LOC106030435;ATP7B;POLH;TOP2A;MGST1
17	map01521	EGFR tyrosine kinase inhibitor resistance		KEGG PATHWAY	17/2172	81/11318	0.383251	0.780609	Human Diseases	Drug resistance: antineoplastic	gene17031|gene7519|gene4637|gene4849|gene7321|gene6002|gene13562|gene17397|gene2407|gene3030|gene13836|gene16801|gene11764|gene530|gene14309|gene5078|gene12197	TGFA;IGF1;FOXO3;PDGFRB;HGF;EVC2;PLA2G4F2;GAB1;IL6;KDR;NRG2;PRKCB;NRG1;FGFR3;LOC106043289;PIK3R3;SRC
18	map04520	Adherens junction		KEGG PATHWAY	18/2172	86/11318	0.382354	0.78359	Cellular Processes	Cellular community - eukaryotes	gene15854|gene7610|gene1214|gene10159|gene1209|gene2120|gene15614|gene4032|gene4772|gene17323|gene16183|gene11130|gene6749|gene12197|gene10022|gene17324|gene5867|gene18465	INSR;BLNK10;PTPN1;LEF1;SNAI1;LOC106029911;LOC106044678;TCF7L2;HPSE272;LOC106046592;PARD3;PVRL1;PTPRM;SRC;LOC106038521;LOC106046593;PTPRF;NFKB265
6	map00062	Fatty acid elongation		KEGG PATHWAY	6/2172	26/11318	0.381293	0.791183	Metabolism	Lipid metabolism	gene7393|gene1468|gene1336|gene19151|gene17906|gene5871	ELOVL7;HSD17B12;LOC106042682;ELOVL4;ACOT7;ELOVL1
6	map00340	Histidine metabolism		KEGG PATHWAY	6/2172	26/11318	0.381293	0.791183	Metabolism	Amino acid metabolism	gene16586|gene16587|gene3295|gene18846|gene8560|gene20768	LOC106045763;LOC106045817;ALDH2;LOC106048260;AMDHD1;LOC106029637
40	map04020	Calcium signaling pathway		KEGG PATHWAY	40/2172	200/11318	0.413013	0.826026	Environmental Information Processing	Signal transduction	gene16349|gene16306|gene12427|gene10808|gene20397|gene16782|gene13457|gene16609|gene20029|gene3342|gene14211|gene18170|gene14050|gene7870|gene19518|gene10735|gene8728|gene8354|gene13258|gene6855|gene11403|gene15729|gene3348|gene20398|gene20399|gene10970|gene16418|gene4257|gene3752|gene10996|gene4930|gene5897|gene4849|gene4315|gene10183|gene19271|gene19270|gene20364|gene10346|gene16801	PDE1C;LOC106045455;GRIN2A;PLCD4;LOC106049912;LOC106045971;CAMK4;ADORA2B;PTK2B;LOC106031149;LHCGR;LOC106047519;CYSLTR1;AGTR1;MYLK4;CXCR4;GRIN1;OXTR;CXCL1258;HTR2A;HRH1;HTR2B;LOC106031415;LOC106049913;LOC106049914;ADCY7;SLC8A1;CACNA1H;ITPKB;MYLK3;HRH2;PTGFR;PDGFRB;EDNRA;LOC106038708;PIK3AP171;PIK3AP170;MOCS14;HTR5A;PRKCB
3	map00920	Sulfur metabolism		KEGG PATHWAY	3/2172	12/11318	0.412869	0.830743	Metabolism	Energy metabolism	gene7603|gene226|gene19772	BLNK03;PAPSS2;LOC10603419772
25	map05034	Alcoholism		KEGG PATHWAY	25/2172	124/11318	0.427121	0.844072	Human Diseases	Substance dependence	gene13457|gene14089|gene1583|gene1582|gene16119|gene1587|gene16609|gene1566|gene20121|gene20120|gene8728|gene1568|gene12427|gene2105|gene7661|gene12691|gene10183|gene18723|gene14137|gene13178|gene1575|gene1571|gene20646|gene1416|gene1569	CAMK4;GRIN3A;LOC1060481533;LOC1060481532;SLC18A2;LOC1060481537;ADORA2B;LOC106045814;LOC106049626;LOC106049629;GRIN1;LOC106045117;GRIN2A;ADCY5;BLNK61;CAMKK1;LOC106038708;LOC106048111;GNAO1;LOC106042035;LOC106045840;LOC106045128;LOC106029507;CREB3L1;LOC106045823
47	map04014	Ras signaling pathway		KEGG PATHWAY	47/2172	237/11318	0.426378	0.847649	Environmental Information Processing	Signal transduction	gene15854|gene12665|gene8973|gene15614|gene16782|gene19948|gene3030|gene9326|gene1360|gene5078|gene1358|gene1359|gene7610|gene7321|gene19270|gene18243|gene1356|gene16188|gene11513|gene11894|gene7975|gene8728|gene17031|gene530|gene1157|gene13562|gene17397|gene12427|gene5968|gene11699|gene11465|gene12556|gene1364|gene1361|gene7519|gene18968|gene1362|gene19217|gene15263|gene4849|gene10183|gene208|ge…	INSR;LOC106041406;FGF13;LOC106044678;LOC106045971;RASAL3;KDR;FIGF;LOC106042985;PIK3R3;LOC106042968;LOC106042978;BLNK10;HGF;PIK3AP170;FGF12;PLA2G4F;NFKB1;LOC106040243;ETS1;FGF10;GRIN1;TGFA;FGFR3;STK4;PLA2G4F2;GAB1;GRIN2A;WFS18;FGF9;EPHA2;RASSF5;LOC106040722;LOC106043002;IGF1;ZAP70;LOC106042972;RASGRF1;LOC106044308;PDGFRB;LOC106038708;LOC106030078;ETS2;PIK3AP171;FGFR4;EVC2;PRKCB
23	map05146	Amoebiasis		KEGG PATHWAY	23/2172	114/11318	0.431593	0.847863	Human Diseases	Infectious disease: parasitic	gene16306|gene13591|gene10062|gene2407|gene5078|gene6988|gene20213|gene3800|gene13160|gene20146|gene16188|gene20397|gene12566|gene20823|gene20398|gene20399|gene4601|gene4508|gene12858|gene12857|gene16801|gene12533|gene2370	LOC106045455;LAMC2;COL4A6;IL6;PIK3R3;CASP3;IL1B;ARG2;LAMB1;LOC106049641;NFKB1;LOC106049912;RAB7B;LOC10603007823;LOC106049913;LOC106049914;LAMA4;LAMA2;IL1R2;LOC106041672;PRKCB;LAMB3;ITGB2
13	map05223	Non-small cell lung cancer		KEGG PATHWAY	13/2172	63/11318	0.435033	0.849594	Human Diseases	Cancer: specific types	gene18816|gene12815|gene4637|gene1157|gene16898|gene19020|gene12556|gene17031|gene16801|gene16021|gene2519|gene5078|gene18392	LOC106048210;RXRG;FOXO3;STK4;BAK1;LOC10602987820;RASSF5;TGFA;PRKCB;LOC106045119;RARB;PIK3R3;PSD92
13	map04730	Long-term depression		KEGG PATHWAY	13/2172	63/11318	0.435033	0.849594	Organismal Systems	Nervous system	gene1358|gene1360|gene6455|gene1361|gene1359|gene4881|gene1356|gene14137|gene1362|gene4367|gene16801|gene7519|gene1364	LOC106042968;LOC106042985;GNA13;LOC106043002;LOC106042978;GRIA1;PLA2G4F;GNAO1;LOC106042972;GUCY1A3;PRKCB;IGF1;LOC106040722
23	map05142	Chagas disease (American trypanosomiasis)		KEGG PATHWAY	23/2172	116/11318	0.467944	0.853612	Human Diseases	Infectious disease: parasitic	gene16306|gene16782|gene4965|gene2407|gene5078|gene20213|gene10253|gene16188|gene12638|gene2120|gene10561|gene12292|gene20823|gene11186|gene11185|gene1052|gene208|gene10304|gene14137|gene19271|gene19270|gene5182|gene5185	LOC106045455;LOC106045971;JUN;IL6;PIK3R3;IL1B;NFKBIA;NFKB1;LOC106041491;LOC106029911;LOC106039090;LOC106041040;LOC10603007823;CD3E;CD3D;CD247;LOC106030078;FOS;GNAO1;PIK3AP171;PIK3AP170;LOC106033293;LOC106033294
1	map00290	Valine, leucine and isoleucine biosynthesis		KEGG PATHWAY	1/2172	3/11318	0.472336	0.856916	Metabolism	Amino acid metabolism	gene16324	BCAT1
18	map04211	Longevity regulating pathway		KEGG PATHWAY	18/2172	89/11318	0.444102	0.85722	Organismal Systems	Aging	gene7519|gene4637|gene9039|gene10970|gene4973|gene13457|gene15854|gene1416|gene2105|gene7661|gene1504|gene16188|gene7933|gene3414|gene679|gene5078|gene6036|gene3131	IGF1;FOXO3;LOC106037440;ADCY7;PRKAA2;CAMK4;INSR;CREB3L1;ADCY5;BLNK61;CAT;NFKB1;IRS1;ULK1;PPARGC1A;PIK3R3;SESN3;DNA21
5	map04966	Collecting duct acid secretion		KEGG PATHWAY	5/2172	23/11318	0.459744	0.8575	Organismal Systems	Excretory system	gene14247|gene3373|gene2944|gene16734|gene8686	ATP6V1B1;TCTN2;ATP6V1C2;LOC106045951;ATP6V1G1
4	map00670	One carbon pool by folate		KEGG PATHWAY	4/2172	18/11318	0.463854	0.860332	Metabolism	Metabolism of cofactors and vitamins	gene4250|gene11553|gene1888|gene18281	SHMT1;MTHFR;MTR;MTHFD2
4	map00770	Pantothenate and CoA biosynthesis		KEGG PATHWAY	4/2172	18/11318	0.463854	0.860332	Metabolism	Metabolism of cofactors and vitamins	gene14372|gene16324|gene3521|gene4534	GADL1;BCAT1;UPB1;LOC106032501
4	map00533	Glycosaminoglycan biosynthesis - keratan sulfate		KEGG PATHWAY	4/2172	18/11318	0.463854	0.860332	Metabolism	Glycan biosynthesis and metabolism	gene16269|gene1404|gene15726|gene862	TNFRSF13C9;CHST1;B3GNT7;B4GALT4
26	map04611	Platelet activation		KEGG PATHWAY	26/2172	131/11318	0.459115	0.861165	Organismal Systems	Immune system	gene15614|gene5700|gene4367|gene5078|gene1358|gene1359|gene6455|gene16763|gene1164|gene1356|gene13258|gene6211|gene10714|gene2105|gene3225|gene16004|gene10996|gene12197|gene1361|gene1360|gene1362|gene1364|gene10970|gene7346|gene9293|gene19518	LOC106044678;TLN2;GUCY1A3;PIK3R3;LOC106042968;LOC106042978;GNA13;ITGB3;LOC106041081;PLA2G4F;CXCL1258;LCP2;GP5;ADCY5;TBXAS1;SYK;MYLK3;SRC;LOC106043002;LOC106042985;LOC106042972;LOC106040722;ADCY7;ITGA2;GPR1613;MYLK4
33	map05167	Kaposi sarcoma-associated herpesvirus infection		KEGG PATHWAY	33/2172	167/11318	0.456609	0.861331	Human Diseases	Infectious disease: viral	gene4965|gene2407|gene1969|gene14442|gene3889|gene5078|gene6988|gene20337|gene10253|gene8744|gene12998|gene17812|gene9948|gene16188|gene17686|gene16898|gene13562|gene9869|gene12557|gene16021|gene16004|gene12197|gene18392|gene10183|gene208|gene10304|gene19020|gene1227|gene1195|gene5990|gene20644|gene9870|gene11333	JUN;IL6;EIF2AK2;RCAN1;IRF7;PIK3R3;CASP3;LOC106049848;NFKBIA;TRAF2;CCR4;HCK;MYC;NFKB1;TRAF3;BAK1;PLA2G4F2;LOC106038356;IKBKE;LOC106045119;SYK;SRC;PSD92;LOC106038708;LOC106030078;FOS;LOC10602987820;NFATC2;PREX1;PTGS2;LOC106029505;LOC106038357;STAT1
22	map04724	Glutamatergic synapse		KEGG PATHWAY	22/2172	110/11318	0.452532	0.863452	Organismal Systems	Nervous system	gene8697|gene4881|gene14089|gene14309|gene1358|gene1359|gene18754|gene18756|gene1356|gene8728|gene14419|gene12427|gene2105|gene1364|gene1361|gene1360|gene1362|gene20461|gene10970|gene14137|gene16801|gene1792	LOC106037044;GRIA1;GRIN3A;LOC106043289;LOC106042968;LOC106042978;LOC106048154;LOC106048152;PLA2G4F;GRIN1;HOMER2;GRIN2A;ADCY5;LOC106040722;LOC106043002;LOC106042985;LOC106042972;ADRBK1;ADCY7;GNAO1;PRKCB;SLC38A2
6	map03410	Base excision repair		KEGG PATHWAY	6/2172	28/11318	0.455951	0.865005	Genetic Information Processing	Replication and repair	gene18126|gene3268|gene5395|gene4294|gene12913|gene5095	POLE;UNG;POLN5;NTHL1;NEIL3;MUTYH
7	map00052	Galactose metabolism		KEGG PATHWAY	7/2172	33/11318	0.452428	0.868244	Metabolism	Carbohydrate metabolism	gene16452|gene10738|gene19453|gene13170|gene20011|gene3103|gene3107	UGP2;LCT;GCK;LOC106042005;LOC106049507;LOC106030914;LOC106030918
7	map00051	Fructose and mannose metabolism		KEGG PATHWAY	7/2172	34/11318	0.486166	0.872472	Metabolism	Carbohydrate metabolism	gene16232|gene19453|gene20011|gene18098|gene13911|gene3103|gene3107	LOC106045365;GCK;LOC106049507;SORD;LOC106042848;LOC106030914;LOC106030918
23	map04931	Insulin resistance		KEGG PATHWAY	23/2172	117/11318	0.486064	0.877029	Human Diseases	Endocrine and metabolic disease	gene15854|gene17471|gene2407|gene4100|gene5078|gene16856|gene1214|gene10253|gene7933|gene16188|gene679|gene5867|gene3267|gene4973|gene18515|gene7318|gene15263|gene15538|gene4826|gene10220|gene16801|gene20117|gene1416	INSR;SOCS3;IL6;SLC2A2;PIK3R3;PPP1R3B;PTPN1;NFKBIA;IRS1;NFKB1;PPARGC1A;PTPRF;ACACB;PRKAA2;RPS6KA1;CD36;LOC106044308;AGT;GFPT2;PRKCQ;PRKCB;LOC106049619;CREB3L1
14	map04212	Longevity regulating pathway - worm		KEGG PATHWAY	14/2172	71/11318	0.502748	0.897378	Organismal Systems	Aging	gene15854|gene16588|gene11359|gene2668|gene2665|gene7933|gene2666|gene172|gene3234|gene7661|gene4637|gene1504|gene9825|gene3090	INSR;ULK2;HSPD1;LOC106030437;LOC106030435;IRS1;LOC106030436;SCD;CCDC53;BLNK61;FOXO3;CAT;HSBP1L1;MGST1
10	map04214	Apoptosis - fly		KEGG PATHWAY	10/2172	51/11318	0.526167	0.929189	Cellular Processes	Cell growth and death	gene7046|gene16896|gene16458|gene3709|gene4965|gene10080|gene7661|gene15756|gene14409|gene11741	STK3;LOC106046185;LMNB2;DUSP10;JUN;XIAP;BLNK61;LOC1060458406;LOC106043362;LMNB1
2	map00130	Ubiquinone and other terpenoid-quinone biosynthesis		KEGG PATHWAY	2/2172	9/11318	0.53906	0.932125	Metabolism	Metabolism of cofactors and vitamins	gene17334|gene5444	NQO1;COQ7
18	map00561	Glycerolipid metabolism		KEGG PATHWAY	18/2172	93/11318	0.525908	0.933698	Metabolism	Lipid metabolism	gene9602|gene20038|gene9769|gene20768|gene1417|gene11578|gene20702|gene8924|gene16587|gene3295|gene13512|gene7962|gene3893|gene16586|gene3103|gene12296|gene3107|gene3764	MGLL;LOC106049530;LOC106038244;LOC106029637;DGKZ;DGKQ;LOC106029567;LIPG;LOC106045817;ALDH2;DGAT2;MOGAT1;PNPLA2;LOC106045763;LOC106030914;LOC106041043;LOC106030918;LCLAT1
32	map04022	cGMP-PKG signaling pathway		KEGG PATHWAY	32/2172	167/11318	0.535413	0.935564	Environmental Information Processing	Signal transduction	gene15854|gene15614|gene12341|gene12342|gene4209|gene15653|gene4367|gene16663|gene6021|gene989|gene6455|gene7933|gene18170|gene9727|gene7870|gene11550|gene12521|gene3348|gene2105|gene7661|gene16418|gene12192|gene10996|gene4021|gene16293|gene4315|gene10183|gene1227|gene18210|gene19518|gene10970|gene1416	INSR;LOC106044678;GTF2I;GTF2IRD1;LOC106032083;SRF;GUCY1A3;ADORA1;TRPC6;MYH15;GNA13;IRS1;LOC106047519;KCNJ8;AGTR1;NPPC;LOC106041380;LOC106031415;ADCY5;BLNK61;SLC8A1;PDE3B;MYLK3;ADRA2A;MYL9;EDNRA;LOC106038708;NFATC2;MEF2C;MYLK4;ADCY7;CREB3L1
5	map04320	Dorso-ventral axis formation		KEGG PATHWAY	5/2172	25/11318	0.539048	0.936983	Organismal Systems	Development and regeneration	gene18084|gene19016|gene7841|gene17263|gene11894	CPEB1;LOC10602987816;ETS2;SPIRE2;ETS1
9	map04973	Carbohydrate digestion and absorption		KEGG PATHWAY	9/2172	46/11318	0.533581	0.937295	Organismal Systems	Digestive system	gene15274|gene10738|gene15547|gene10093|gene19453|gene4100|gene20011|gene16801|gene5078	SLC2A5;LCT;LOC106044607;LOC106038686;GCK;SLC2A2;LOC106049507;PRKCB;PIK3R3
4	map00511	Other glycan degradation		KEGG PATHWAY	4/2172	20/11318	0.552677	0.940969	Metabolism	Glycan biosynthesis and metabolism	gene17463|gene591|gene10638|gene19078	ENGASE;LOC106035038;NEU4;LOC10602987878
29	map04921	Oxytocin signaling pathway		KEGG PATHWAY	29/2172	152/11318	0.547099	0.941124	Organismal Systems	Endocrine system	gene15614|gene13457|gene4965|gene14442|gene4367|gene1358|gene1359|gene1356|gene16803|gene8354|gene5990|gene4973|gene10970|gene10996|gene12197|gene1364|gene1361|gene1360|gene1362|gene16293|gene2105|gene10304|gene10183|gene19020|gene14137|gene1227|gene18210|gene19518|gene16801	LOC106044678;CAMK4;JUN;RCAN1;GUCY1A3;LOC106042968;LOC106042978;PLA2G4F;CACNG3;OXTR;PTGS2;PRKAA2;ADCY7;MYLK3;SRC;LOC106040722;LOC106043002;LOC106042985;LOC106042972;MYL9;ADCY5;FOS;LOC106038708;LOC10602987820;GNAO1;NFATC2;MEF2C;MYLK4;PRKCB
7	map04624	Toll and Imd signaling pathway		KEGG PATHWAY	7/2172	36/11318	0.551565	0.943915	Organismal Systems	Immune system	gene15343|gene10253|gene350|gene4965|gene4218|gene18099|gene16188	ANK1;NFKBIA;ANK3;JUN;MAP2K3;DUOX2;NFKB1
15	map05220	Chronic myeloid leukemia		KEGG PATHWAY	15/2172	79/11318	0.563867	0.945474	Human Diseases	Cancer: specific types	gene15263|gene208|gene10253|gene16898|gene19020|gene2120|gene14438|gene978|gene10428|gene9948|gene4080|gene16188|gene16021|gene5078|gene18392	LOC106044308;LOC106030078;NFKBIA;BAK1;LOC10602987820;LOC106029911;RUNX1;CBLB;CTBP2;MYC;MECOM;NFKB1;LOC106045119;PIK3R3;PSD92
1	map00261	Monobactam biosynthesis		KEGG PATHWAY	1/2172	4/11318	0.573625	0.947481	Metabolism	Biosynthesis of other secondary metabolites	gene226	PAPSS2
8	map04930	Type II diabetes mellitus		KEGG PATHWAY	8/2172	42/11318	0.571532	0.948743	Human Diseases	Endocrine and metabolic disease	gene15854|gene17471|gene7933|gene19453|gene4100|gene20011|gene12442|gene5078	INSR;SOCS3;IRS1;GCK;SLC2A2;LOC106049507;SOCS1;PIK3R3
11	map04213	Longevity regulating pathway - multiple species		KEGG PATHWAY	11/2172	58/11318	0.570383	0.951593	Organismal Systems	Aging	gene15854|gene4637|gene7519|gene4973|gene7933|gene2105|gene1504|gene8833|gene10970|gene5078|gene11109	INSR;FOXO3;IGF1;PRKAA2;IRS1;ADCY5;CAT;HSPA2;ADCY7;PIK3R3;HSPA8
12	map04622	RIG-I-like receptor signaling pathway		KEGG PATHWAY	12/2172	63/11318	0.562406	0.952647	Organismal Systems	Immune system	gene17686|gene13264|gene13265|gene10253|gene8744|gene13304|gene12557|gene208|gene18619|gene16188|gene11576|gene3889	TRAF3;CXCL1264;CXCL1265;NFKBIA;TRAF2;LOC106042201;IKBKE;LOC106030078;LOC106047988;NFKB1;DDX58;IRF7
12	map00240	Pyrimidine metabolism		KEGG PATHWAY	12/2172	63/11318	0.562406	0.952647	Metabolism	Nucleotide metabolism	gene2984|gene8212|gene17473|gene18422|gene2935|gene13726|gene3521|gene4833|gene9334|gene17313|gene12063|gene14963	LOC106030817;UPP1;TK1;NFKB222;RRM2;LOC106042626;UPB1;LOC106032673;CTPS2;LOC106046581;UCKL1;CD443
17	map05210	Colorectal cancer		KEGG PATHWAY	17/2172	91/11318	0.591608	0.972345	Human Diseases	Cancer: specific types	gene17031|gene6988|gene7610|gene8056|gene10159|gene15614|gene13079|gene4032|gene2120|gene19020|gene4965|gene16898|gene9948|gene4772|gene10304|gene13078|gene5078	TGFA;CASP3;BLNK10;PMAIP1;LEF1;LOC106044678;EREG;TCF7L2;LOC106029911;LOC10602987820;JUN;BAK1;MYC;HPSE272;FOS;AREG;PIK3R3
6	map04392	Hippo signaling pathway - multiple species		KEGG PATHWAY	6/2172	32/11318	0.596247	0.975143	Environmental Information Processing	Signal transduction	gene7046|gene14962|gene15511|gene18300|gene4355|gene13549	STK3;MOB1B;FRMD1;RASSF2;DCHS2;FAT4
6	map03030	DNA replication		KEGG PATHWAY	6/2172	32/11318	0.596247	0.975143	Genetic Information Processing	Replication and repair	gene313|gene10737|gene18126|gene9911|gene9675|gene10566	DNA2;MCM6;POLE;MCM4;MCM3;RFC1
5	map00650	Butanoate metabolism		KEGG PATHWAY	5/2172	27/11318	0.612479	0.991918	Metabolism	Carbohydrate metabolism	gene2647|gene10595|gene10701|gene16193|gene5460	HMGCLL1;EHHADH;BDH1;BDH2;LOC106033473
13	map03013	RNA transport		KEGG PATHWAY	13/2172	222/11318	1	1	Genetic Information Processing	Translation	gene7041|gene19180|gene10298|gene11429|gene16579|gene7515|gene8304|gene14952|gene19905|gene12909|gene18839|gene17191|gene4907	POP1;EIF4G3;EIF2B2;NUP210;GEMIN4;NUP37;XPO1;NUP54;TJAP15;NUP153;NUP160;UPF3A;CYFIP2
14	map04013	MAPK signaling pathway - fly		KEGG PATHWAY	14/2172	77/11318	0.634762	1	Environmental Information Processing	Signal transduction	gene7841|gene3709|gene15263|gene13304|gene4965|gene4218|gene18099|gene8304|gene19016|gene15397|gene11894|gene14075|gene12197|gene9366	ETS2;DUSP10;LOC106044308;LOC106042201;JUN;MAP2K3;DUOX2;XPO1;LOC10602987816;LOC106044391;ETS1;LOC106042970;SRC;CNKSR2
7	map00620	Pyruvate metabolism		KEGG PATHWAY	7/2172	39/11318	0.642058	1	Metabolism	Carbohydrate metabolism	gene3267|gene16586|gene16587|gene3295|gene20768|gene4279|gene13409	ACACB;LOC106045763;LOC106045817;ALDH2;LOC106029637;HAGH;ACYP2
13	map04917	Prolactin signaling pathway		KEGG PATHWAY	13/2172	72/11318	0.643866	1	Organismal Systems	Endocrine system	gene4749|gene4637|gene17471|gene10304|gene13920|gene14211|gene8032|gene4100|gene16188|gene12442|gene5078|gene12197|gene11333	IRF1;FOXO3;SOCS3;FOS;CISH;LHCGR;PRLR;SLC2A2;NFKB1;SOCS1;PIK3R3;SRC;STAT1
8	map00270	Cysteine and methionine metabolism		KEGG PATHWAY	8/2172	45/11318	0.654515	1	Metabolism	Amino acid metabolism	gene20429|gene7603|gene5961|gene19449|gene16324|gene9371|gene1888|gene4615	IL4I1;BLNK03;CCBL2;MAT2A;BCAT1;SMS;MTR;AMD1
1	map00232	Caffeine metabolism		KEGG PATHWAY	1/2172	5/11318	0.655478	1	Metabolism	Biosynthesis of other secondary metabolites	gene5923	LOC106033995
16	map04012	ErbB signaling pathway		KEGG PATHWAY	16/2172	89/11318	0.656811	1	Environmental Information Processing	Signal transduction	gene17031|gene16801|gene13079|gene13078|gene17397|gene19020|gene4965|gene978|gene13840|gene9948|gene13836|gene400|gene11764|gene14309|gene5078|gene12197	TGFA;PRKCB;EREG;AREG;GAB1;LOC10602987820;JUN;CBLB;HBEGF;MYC;NRG2;NRG3;NRG1;LOC106043289;PIK3R3;SRC
9	map02010	ABC transporters		KEGG PATHWAY	9/2172	51/11318	0.665882	1	Environmental Information Processing	Membrane transport	gene20335|gene3356|gene6349|gene170|gene19904|gene9726|gene5431|gene20641|gene20642	LOC106049856;ABCB9;ABCA12;LOC106049164;TJAP14;ABCC9;LOC106033455;LOC106029502;TAP2
17	map04974	Protein digestion and absorption		KEGG PATHWAY	17/2172	95/11318	0.666839	1	Organismal Systems	Digestive system	gene10169|gene9578|gene17377|gene3916|gene15122|gene10171|gene2590|gene10062|gene13482|gene18649|gene16418|gene2031|gene19934|gene3981|gene20084|gene3608|gene1792	LOC106038763;COL7A1;COL6A6;SLC15A1;LOC106044084;LOC106038694;COL12A1;COL4A6;KCNE3;PRCP;SLC8A1;KCNK5;LOC106049424;COL17A1;COL2A1;SLC3A1;SLC38A2
39	map04024	cAMP signaling pathway		KEGG PATHWAY	39/2172	215/11318	0.680484	1	Environmental Information Processing	Signal transduction	gene20628|gene15614|gene4881|gene13457|gene4965|gene16663|gene2158|gene7410|gene14089|gene6436|gene7452|gene5078|gene6432|gene12192|gene10253|gene6174|gene17316|gene18304|gene16188|gene7691|gene8728|gene8354|gene13258|gene12131|gene3348|gene12427|gene4411|gene2105|gene7610|gene14604|gene14211|gene16293|gene4315|gene10183|gene10304|gene19959|gene10970|gene576|gene1416	LOC106029489;LOC106044678;GRIA1;CAMK4;JUN;ADORA1;GCG;HTR1A;GRIN3A;SOX9;CNGA3;PIK3R3;SSTR2;PDE3B;NFKBIA;ARAP3;EDN2;SUCNR1;NFKB1;BLNK91;GRIN1;OXTR;CXCL1258;EDN3;LOC106031415;GRIN2A;NPY1R;ADCY5;BLNK10;PDE4B;LHCGR;MYL9;EDNRA;LOC106038708;FOS;LOC106049445;ADCY7;ACOX3;CREB3L1
15	map01522	Endocrine resistance		KEGG PATHWAY	15/2172	85/11318	0.68411	1	Human Diseases	Drug resistance: antineoplastic	gene7519|gene17850|gene5530|gene10970|gene10304|gene14183|gene19020|gene4965|gene13840|gene2105|gene16021|gene5032|gene5078|gene12197|gene18392	IGF1;MMP9;GPER1;ADCY7;FOS;MMP2;LOC10602987820;JUN;HBEGF;ADCY5;LOC106045119;CDKN2C;PIK3R3;SRC;PSD92
10	map05230	Central carbon metabolism in cancer		KEGG PATHWAY	10/2172	58/11318	0.698446	1	Human Diseases	Cancer: overview	gene8107|gene17501|gene4849|gene421|gene19453|gene9948|gene4100|gene20011|gene530|gene5078	NTRK3;SLC16A3;PDGFRB;RET;GCK;MYC;SLC2A2;LOC106049507;FGFR3;PIK3R3
3	map00360	Phenylalanine metabolism		KEGG PATHWAY	3/2172	18/11318	0.699993	1	Metabolism	Amino acid metabolism	gene20429|gene7523|gene18846	IL4I1;PAH;LOC106048260
10	map05213	Endometrial cancer		KEGG PATHWAY	10/2172	59/11318	0.719563	1	Human Diseases	Cancer: specific types	gene4637|gene10159|gene16898|gene19020|gene4032|gene9948|gene4772|gene17324|gene5078|gene17323	FOXO3;LEF1;BAK1;LOC10602987820;TCF7L2;MYC;HPSE272;LOC106046593;PIK3R3;LOC106046592
20	map05231	Choline metabolism in cancer		KEGG PATHWAY	20/2172	115/11318	0.724422	1	Human Diseases	Cancer: overview	gene1358|gene1359|gene20038|gene16801|gene4849|gene16437|gene11578|gene4965|gene1356|gene1361|gene1360|gene7610|gene10861|gene10304|gene10022|gene6002|gene1364|gene1417|gene5078|gene1362	LOC106042968;LOC106042978;LOC106049530;PRKCB;PDGFRB;GPCPD1;DGKQ;JUN;PLA2G4F;LOC106043002;LOC106042985;BLNK10;SLC44A3;FOS;LOC106038521;EVC2;LOC106040722;DGKZ;PIK3R3;LOC106042972
9	map04742	Taste transduction		KEGG PATHWAY	9/2172	54/11318	0.733546	1	Organismal Systems	Sensory system	gene16349|gene1164|gene15547|gene16816|gene2995|gene18496|gene7410|gene7691|gene2031	PDE1C;LOC106041081;LOC106044607;SCNN1B;GABRA4;NFKB296;HTR1A;BLNK91;KCNK5
3	map04950	Maturity onset diabetes of the young		KEGG PATHWAY	3/2172	19/11318	0.735771	1	Human Diseases	Endocrine and metabolic disease	gene88|gene1172|gene4100	HHEX;HNF4A;SLC2A2
3	map00220	Arginine biosynthesis		KEGG PATHWAY	3/2172	19/11318	0.735771	1	Metabolism	Amino acid metabolism	gene8697|gene3800|gene15059	LOC106037044;ARG2;ASS1
24	map05160	Hepatitis C		KEGG PATHWAY	24/2172	138/11318	0.737561	1	Human Diseases	Infectious disease: viral	gene19675|gene12662|gene17471|gene12557|gene1969|gene12308|gene3889|gene5078|gene6988|gene10253|gene8744|gene9948|gene16188|gene6138|gene17686|gene11576|gene16898|gene19851|gene16021|gene18392|gene208|gene19020|gene7825|gene11333	CLDN19;YWHAG;SOCS3;IKBKE;EIF2AK2;LOC106041034;IRF7;PIK3R3;CASP3;NFKBIA;TRAF2;MYC;NFKB1;CLDN20;TRAF3;DDX58;BAK1;CLDN10;LOC106045119;PSD92;LOC106030078;LOC10602987820;LOC106036132;STAT1
13	map04391	Hippo signaling pathway - fly		KEGG PATHWAY	13/2172	77/11318	0.740171	1	Environmental Information Processing	Signal transduction	gene12009|gene7046|gene14962|gene18521|gene2720|gene1239|gene9948|gene15756|gene18300|gene4355|gene5195|gene13549|gene16183	CRB2;STK3;MOB1B;ZDHHC18;CCNE2;TSHZ2;MYC;LOC1060458406;RASSF2;DCHS2;PARD6A;FAT4;PARD3
7	map04340	Hedgehog signaling pathway		KEGG PATHWAY	7/2172	43/11318	0.744418	1	Environmental Information Processing	Signal transduction	gene929|gene20461|gene16992|gene2087|gene600|gene899|gene601	GPR161;ADRBK1;CSNK1G3;LOC1060300787;EVC;BOC;EVC2
15	map05100	Bacterial invasion of epithelial cells		KEGG PATHWAY	15/2172	89/11318	0.752567	1	Human Diseases	Infectious disease: bacterial	gene5347|gene18748|gene9200|gene15614|gene17397|gene978|gene10440|gene3569|gene17969|gene12795|gene17324|gene19119|gene5078|gene12197|gene17323	SEPT12;LOC106048163;SEPT6;LOC106044678;GAB1;CBLB;DOCK1;PXN;DNM1;DNM3;LOC106046593;RHOG;PIK3R3;SRC;LOC106046592
43	map04144	Endocytosis		KEGG PATHWAY	43/2172	244/11318	0.758886	1	Cellular Processes	Transport and catabolism	gene2468|gene5491|gene19495|gene3234|gene5624|gene15178|gene20337|gene19587|gene6174|gene17587|gene15614|gene10215|gene19366|gene8543|gene9042|gene5195|gene10735|gene16183|gene11109|gene8833|gene17468|gene530|gene11426|gene2120|gene18638|gene12273|gene16692|gene17969|gene978|gene9870|gene6506|gene9869|gene12795|gene12197|gene183|gene17947|gene20461|gene13835|gene20014|gene19351|gene556|gene20644|…	WIPF3;CYTH3;RAB25;CCDC53;NEDD4;PML;LOC106049848;VPS45;ARAP3;STAM2;LOC106044678;IL2RA;RAB4A;EEA1;IL2RG;PARD6A;CXCR4;PARD3;HSPA8;HSPA2;CYTH1;FGFR3;IQSEC1;LOC106029911;VPS25;NFATC23;LOC106045913;DNM1;CBLB;LOC106038357;RAB11FIP4;LOC106038356;DNM3;SRC;PSD;SH3GLB2;ADRBK1;PSD2;FGFR4;SH3GL2;GRK4;LOC106029505;RAB11FIP2
5	map04710	Circadian rhythm		KEGG PATHWAY	5/2172	32/11318	0.762698	1	Organismal Systems	Environmental adaptation	gene4973|gene16515|gene19598|gene9224|gene16888	PRKAA2;LOC106045650;NPAS2;PASD1;LOC106046187
24	map04068	FoxO signaling pathway		KEGG PATHWAY	24/2172	140/11318	0.763217	1	Environmental Information Processing	Signal transduction	gene15854|gene5647|gene20037|gene2407|gene15751|gene4107|gene5078|gene4637|gene1484|gene1485|gene16810|gene7933|gene1504|gene14419|gene4973|gene2120|gene1157|gene5106|gene7519|gene208|gene19020|gene20058|gene13228|gene15871	INSR;CCNB2;CCNB3;IL6;BCL6;TNFSF10;PIK3R3;FOXO3;RAG2;RAG1;PLK1;IRS1;CAT;HOMER2;PRKAA2;LOC106029911;STK4;PLK3;IGF1;LOC106030078;LOC10602987820;MRPL148;CXCL1228;LOC10604815371
6	map00630	Glyoxylate and dicarboxylate metabolism		KEGG PATHWAY	6/2172	38/11318	0.763999	1	Metabolism	Carbohydrate metabolism	gene17125|gene8697|gene5309|gene4250|gene1504|gene10588	GLDC;LOC106037044;GCSH;SHMT1;CAT;PCCB
3	map00532	Glycosaminoglycan biosynthesis - chondroitin sulfate / dermatan sulfate		KEGG PATHWAY	3/2172	20/11318	0.768081	1	Metabolism	Glycan biosynthesis and metabolism	gene16142|gene5436|gene290	CHSY3;XYLT1;CHST3
1	map00440	Phosphonate and phosphinate metabolism		KEGG PATHWAY	1/2172	7/11318	0.775074	1	Metabolism	Metabolism of other amino acids	gene16891	CEPT1
10	map04137	Mitophagy - animal		KEGG PATHWAY	10/2172	62/11318	0.776972	1	Cellular Processes	Transport and catabolism	gene4637|gene12566|gene3434|gene4965|gene4580|gene7661|gene1693|gene3414|gene12197|gene18392	FOXO3;RAB7B;PGAM5;JUN;CITED2;BLNK61;TBC1D15;ULK1;SRC;PSD92
2	map00604	Glycosphingolipid biosynthesis - ganglio series		KEGG PATHWAY	2/2172	14/11318	0.781191	1	Metabolism	Glycan biosynthesis and metabolism	gene9722|gene16269	ST8SIA1;TNFRSF13C9
19	map04722	Neurotrophin signaling pathway		KEGG PATHWAY	19/2172	114/11318	0.787819	1	Organismal Systems	Nervous system	gene8107|gene3299|gene4637|gene15263|gene10183|gene2012|gene7933|gene18515|gene10253|gene13457|gene4965|gene7661|gene15614|gene2765|gene16188|gene16484|gene5078|gene17397|gene8347	NTRK3;SH2B3;FOXO3;LOC106044308;LOC106038708;NFKBIE;IRS1;RPS6KA1;NFKBIA;CAMK4;JUN;BLNK61;LOC106044678;RIPK2;NFKB1;MATK;PIK3R3;GAB1;IRAK2
41	map05131	Shigellosis		KEGG PATHWAY	41/2172	237/11318	0.795437	1	Human Diseases	Infectious disease: bacterial	gene16487|gene10808|gene15614|gene14180|gene4965|gene5700|gene12305|gene3669|gene5078|gene5347|gene4637|gene17769|gene17768|gene9200|gene10253|gene8744|gene20146|gene16188|gene5185|gene10440|gene1568|gene12292|gene20213|gene11717|gene17378|gene11169|gene12197|gene1496|gene1497|gene16293|gene18748|gene208|gene2596|gene19453|gene12857|gene3569|gene10220|gene5182|gene20011|gene1571|gene2765	LOC106045683;PLCD4;LOC106044678;LOC106043079;JUN;TLN2;LOC106041090;TRAF5;PIK3R3;SEPT12;FOXO3;LOC106047052;LOC106047050;SEPT6;NFKBIA;TRAF2;LOC106049641;NFKB1;LOC106033294;DOCK1;LOC106045117;LOC106041040;IL1B;LOC106040409;PIK3R4;IL18;SRC;CD44;LOC106044451;MYL9;LOC106048163;LOC106030078;MB21D1;GCK;LOC106041672;PXN;PRKCQ;LOC106033293;LOC106049507;LOC106045128;RIPK2
11	map05214	Glioma		KEGG PATHWAY	11/2172	69/11318	0.797163	1	Human Diseases	Cancer: specific types	gene17031|gene7519|gene4849|gene10183|gene16898|gene19020|gene13457|gene16801|gene16021|gene5078|gene18392	TGFA;IGF1;PDGFRB;LOC106038708;BAK1;LOC10602987820;CAMK4;PRKCB;LOC106045119;PIK3R3;PSD92
7	map04979	Cholesterol metabolism		KEGG PATHWAY	7/2172	46/11318	0.806306	1	Organismal Systems	Digestive system	gene16896|gene19549|gene218|gene13629|gene7318|gene11205|gene4109	LOC106046185;LRP1;LOC106030157;SOAT1;CD36;LOC106039769;NCEH1
7	map05033	Nicotine addiction		KEGG PATHWAY	7/2172	46/11318	0.806306	1	Human Diseases	Substance dependence	gene4881|gene12427|gene6247|gene2995|gene14089|gene9275|gene8728	GRIA1;GRIN2A;GABRB2;GABRA4;GRIN3A;GABRE;GRIN1
7	map04962	Vasopressin-regulated water reabsorption		KEGG PATHWAY	7/2172	46/11318	0.806306	1	Organismal Systems	Excretory system	gene4861|gene3558|gene3559|gene19495|gene1827|gene14258|gene1416	DCTN4;LOC106031351;LOC106031352;RAB25;LOC106047885;NOP56;CREB3L1
8	map04330	Notch signaling pathway		KEGG PATHWAY	8/2172	52/11318	0.806978	1	Environmental Information Processing	Signal transduction	gene7614|gene2495|gene16381|gene10428|gene2815|gene6031|gene8062|gene700	BLNK14;KAT2B;DTX1;CTBP2;HEY1;MAML2;LOC106036305;RBPJ
4	map00100	Steroid biosynthesis		KEGG PATHWAY	4/2172	28/11318	0.813562	1	Metabolism	Lipid metabolism	gene13629|gene218|gene4423|gene5863	SOAT1;LOC106030157;MSMO1;LOC106033854
13	map04925	Aldosterone synthesis and secretion		KEGG PATHWAY	13/2172	82/11318	0.817648	1	Organismal Systems	Endocrine system	gene16801|gene10970|gene10183|gene13457|gene2105|gene15538|gene7661|gene18365|gene3857|gene7870|gene14895|gene1416|gene4257	PRKCB;ADCY7;LOC106038708;CAMK4;ADCY5;AGT;BLNK61;PSD65;PRKD1;AGTR1;NR4A2;CREB3L1;CACNA1H
1	map04122	Sulfur relay system		KEGG PATHWAY	1/2172	8/11318	0.818266	1	Genetic Information Processing	Folding, sorting and degradation	gene7603	BLNK03
1	map04711	Circadian rhythm - fly		KEGG PATHWAY	1/2172	8/11318	0.818266	1	Organismal Systems	Environmental adaptation	gene6519	HLF
19	map04071	Sphingolipid signaling pathway		KEGG PATHWAY	19/2172	117/11318	0.823873	1	Environmental Information Processing	Signal transduction	gene6455|gene10250|gene16801|gene15614|gene8744|gene18974|gene12521|gene20058|gene7610|gene7964|gene16188|gene16929|gene16663|gene15132|gene8261|gene8160|gene5078|gene15923|gene230	GNA13;PPP2R3C;PRKCB;LOC106044678;TRAF2;ACER1;LOC106041380;MRPL148;BLNK10;SGPP2;NFKB1;SMPD2;ADORA1;ACER2;KCNK101;CERS3;PIK3R3;LOC106044958;ASAH2
7	map04961	Endocrine and other factor-regulated calcium reabsorption		KEGG PATHWAY	7/2172	47/11318	0.824168	1	Organismal Systems	Excretory system	gene19495|gene12795|gene17969|gene16418|gene16801|gene20082|gene17531	RAB25;DNM3;DNM1;SLC8A1;PRKCB;VDR;PTH1R
6	map00500	Starch and sucrose metabolism		KEGG PATHWAY	6/2172	41/11318	0.825691	1	Metabolism	Carbohydrate metabolism	gene16452|gene18337|gene19453|gene20011|gene13170|gene1108	UGP2;PSD37;GCK;LOC106049507;LOC106042005;GBE1
6	map00640	Propanoate metabolism		KEGG PATHWAY	6/2172	41/11318	0.825691	1	Metabolism	Carbohydrate metabolism	gene19149|gene3267|gene20447|gene10588|gene10595|gene576	BCKDHB;ACACB;LOC106049951;PCCB;EHHADH;ACOX3
6	map00260	Glycine, serine and threonine metabolism		KEGG PATHWAY	6/2172	41/11318	0.825691	1	Metabolism	Amino acid metabolism	gene7627|gene17125|gene19474|gene13239|gene4250|gene5309	BLNK27;GLDC;CHDH;CXCL1239;SHMT1;GCSH
19	map04926	Relaxin signaling pathway		KEGG PATHWAY	19/2172	118/11318	0.834842	1	Organismal Systems	Endocrine system	gene18170|gene1416|gene10970|gene2120|gene10253|gene4965|gene14137|gene10062|gene2105|gene7661|gene8042|gene16188|gene10304|gene9326|gene17850|gene14183|gene5078|gene12197|gene6006	LOC106047519;CREB3L1;ADCY7;LOC106029911;NFKBIA;JUN;GNAO1;COL4A6;ADCY5;BLNK61;RXFP3;NFKB1;FOS;FIGF;MMP9;MMP2;PIK3R3;SRC;EVC6
4	map00860	Porphyrin and chlorophyll metabolism		KEGG PATHWAY	4/2172	29/11318	0.835158	1	Metabolism	Metabolism of cofactors and vitamins	gene18333|gene14975|gene16397|gene7584	CP;LOC1060444515;HEPH;HMOX1
9	map04927	Cortisol synthesis and secretion		KEGG PATHWAY	9/2172	60/11318	0.839303	1	Organismal Systems	Endocrine system	gene10970|gene2105|gene15538|gene7661|gene18365|gene7870|gene4109|gene1416|gene4257	ADCY7;ADCY5;AGT;BLNK61;PSD65;AGTR1;NCEH1;CREB3L1;CACNA1H
21	map04371	Apelin signaling pathway		KEGG PATHWAY	21/2172	130/11318	0.840589	1	Environmental Information Processing	Signal transduction	gene18210|gene6455|gene16418|gene10183|gene4973|gene13457|gene17378|gene8086|gene4693|gene15871|gene16029|gene2105|gene19518|gene7870|gene17324|gene10970|gene12192|gene679|gene10996|gene17323|gene15338	MEF2C;GNA13;SLC8A1;LOC106038708;PRKAA2;CAMK4;PIK3R4;PLIN1;EGR1;LOC10604815371;LOC106045149;ADCY5;MYLK4;AGTR1;LOC106046593;ADCY7;PDE3B;PPARGC1A;MYLK3;LOC106046592;PLAT
7	map00514	Other types of O-glycan biosynthesis		KEGG PATHWAY	7/2172	48/11318	0.840711	1	Metabolism	Glycan biosynthesis and metabolism	gene7273|gene7614|gene19260|gene19356|gene2177|gene3782|gene12383	GXYLT2;BLNK14;PIK3AP160;GALNT2;GALNT3;GALNT16;B3GLCT
14	map05032	Morphine addiction		KEGG PATHWAY	14/2172	90/11318	0.845056	1	Human Diseases	Substance dependence	gene16349|gene12192|gene6247|gene20461|gene10970|gene14137|gene2105|gene2995|gene16801|gene556|gene16663|gene9275|gene14604|gene7691	PDE1C;PDE3B;GABRB2;ADRBK1;ADCY7;GNAO1;ADCY5;GABRA4;PRKCB;GRK4;ADORA1;GABRE;PDE4B;BLNK91
5	map00350	Tyrosine metabolism		KEGG PATHWAY	5/2172	36/11318	0.847458	1	Metabolism	Amino acid metabolism	gene4280|gene18846|gene20702|gene10328|gene20429	FAHD1;LOC106048260;LOC106029567;GSTZ1;IL4I1
21	map04142	Lysosome		KEGG PATHWAY	21/2172	131/11318	0.850347	1	Cellular Processes	Transport and catabolism	gene3232|gene3356|gene780|gene14924|gene6451|gene829|gene19078|gene7034|gene3373|gene18040|gene462|gene15892|gene13912|gene20267|gene9245|gene19789|gene218|gene11773|gene4152|gene7955|gene6928	GNPTAB;ABCB9;LGMN;CLN5;ARSG;GALC;LOC10602987878;LAPTM4B;TCTN2;LOC106047369;AP3M1;LOC106044971;LOC106042799;TPP1;IDS;LOC10603419789;LOC106030157;IDUA;LAMP3;AP1S3;HGSNAT
9	map00010	Glycolysis / Gluconeogenesis		KEGG PATHWAY	9/2172	61/11318	0.853231	1	Metabolism	Carbohydrate metabolism	gene16232|gene20702|gene16586|gene16587|gene19453|gene18846|gene20768|gene20011|gene3295	LOC106045365;LOC106029567;LOC106045763;LOC106045817;GCK;LOC106048260;LOC106029637;LOC106049507;ALDH2
14	map04540	Gap junction		KEGG PATHWAY	14/2172	91/11318	0.856368	1	Cellular Processes	Cellular community - eukaryotes	gene6775|gene349|gene4849|gene14118|gene15729|gene6855|gene2105|gene8702|gene6002|gene16684|gene16801|gene10970|gene12197|gene4367	TUBB6;CDK1;PDGFRB;LPAR1;HTR2B;HTR2A;ADCY5;TUBB4B;EVC2;LOC106045884;PRKCB;ADCY7;SRC;GUCY1A3
5	map00760	Nicotinate and nicotinamide metabolism		KEGG PATHWAY	5/2172	37/11318	0.864222	1	Metabolism	Metabolism of cofactors and vitamins	gene15914|gene2984|gene14753|gene13726|gene13146	NMRK2;LOC106030817;NUDT12;LOC106042626;NAMPT
11	map05212	Pancreatic cancer		KEGG PATHWAY	11/2172	74/11318	0.865302	1	Human Diseases	Cancer: specific types	gene17031|gene7610|gene16898|gene2120|gene19020|gene208|gene16188|gene16021|gene11333|gene5078|gene18392	TGFA;BLNK10;BAK1;LOC106029911;LOC10602987820;LOC106030078;NFKB1;LOC106045119;STAT1;PIK3R3;PSD92
3	map00515	Mannose type O-glycan biosynthesis		KEGG PATHWAY	3/2172	24/11318	0.866396	1	Metabolism	Glycan biosynthesis and metabolism	gene9051|gene6041|gene6929	ISPD;FUT4;POMK
22	map04910	Insulin signaling pathway		KEGG PATHWAY	22/2172	139/11318	0.870443	1	Organismal Systems	Endocrine system	gene15854|gene17471|gene5078|gene14042|gene16856|gene14041|gene1214|gene5520|gene7933|gene4973|gene12442|gene679|gene5867|gene3267|gene16232|gene13149|gene978|gene12192|gene10183|gene17498|gene19453|gene20011	INSR;SOCS3;PIK3R3;CHST12;PPP1R3B;CHST11;PTPN1;PRKAR1B;IRS1;PRKAA2;SOCS1;PPARGC1A;PTPRF;ACACB;LOC106045365;PRKAR2B;CBLB;PDE3B;LOC106038708;FASN;GCK;LOC106049507
6	map00830	Retinol metabolism		KEGG PATHWAY	6/2172	44/11318	0.873795	1	Metabolism	Metabolism of cofactors and vitamins	gene15194|gene197|gene11833|gene20702|gene4186|gene14975	LOC106044188;LOC106034197;PNPLA4;LOC106029567;LOC106032071;LOC1060444515
1	map00740	Riboflavin metabolism		KEGG PATHWAY	1/2172	10/11318	0.881367	1	Metabolism	Metabolism of cofactors and vitamins	gene15424	LOC106044464
10	map04971	Gastric acid secretion		KEGG PATHWAY	10/2172	70/11318	0.887794	1	Organismal Systems	Digestive system	gene826|gene4930|gene7843|gene10183|gene2105|gene19518|gene16801|gene10970|gene10996|gene6432	KCNK10;HRH2;KCNJ15;LOC106038708;ADCY5;MYLK4;PRKCB;ADCY7;MYLK3;SSTR2
11	map04970	Salivary secretion		KEGG PATHWAY	11/2172	77/11318	0.896538	1	Organismal Systems	Digestive system	gene19872|gene16801|gene1716|gene10970|gene19256|gene10183|gene2105|gene19273|gene4367|gene19871|gene15683	LOC106049352;PRKCB;LYZ;ADCY7;PIK3AP156;LOC106038708;ADCY5;LOC106048722;GUCY1A3;LOC106049351;LOC1060451173
10	map00310	Lysine degradation		KEGG PATHWAY	10/2172	71/11318	0.897763	1	Metabolism	Amino acid metabolism	gene16994|gene5721|gene18637|gene16522|gene16586|gene16587|gene3295|gene20768|gene18174|gene10595	PRDM6;HYKK;EZH1;DOT1L;LOC106045763;LOC106045817;ALDH2;LOC106029637;TMLHE;EHHADH
3	map00534	Glycosaminoglycan biosynthesis - heparan sulfate / heparin		KEGG PATHWAY	3/2172	26/11318	0.900126	1	Metabolism	Glycan biosynthesis and metabolism	gene5436|gene10117|gene20821	XYLT1;NDST4;LOC10603007821
14	map04070	Phosphatidylinositol signaling system		KEGG PATHWAY	14/2172	96/11318	0.903559	1	Environmental Information Processing	Signal transduction	gene18766|gene20038|gene14041|gene10808|gene10183|gene1417|gene11578|gene14042|gene12304|gene16801|gene11669|gene3752|gene5078|gene18296	CDS1;LOC106049530;CHST11;PLCD4;LOC106038708;DGKZ;DGKQ;CHST12;MTMR4;PRKCB;INPP5D;ITPKB;PIK3R3;CDS2
19	map04152	AMPK signaling pathway		KEGG PATHWAY	19/2172	127/11318	0.911747	1	Environmental Information Processing	Signal transduction	gene7519|gene1172|gene4637|gene10250|gene3267|gene16232|gene15854|gene4973|gene7933|gene17498|gene172|gene1416|gene13574|gene7318|gene13911|gene3414|gene679|gene5078|gene3131	IGF1;HNF4A;FOXO3;PPP2R3C;ACACB;LOC106045365;INSR;PRKAA2;IRS1;FASN;SCD;CREB3L1;CCNA2;CD36;LOC106042848;ULK1;PPARGC1A;PIK3R3;DNA21
8	map04918	Thyroid hormone synthesis		KEGG PATHWAY	8/2172	60/11318	0.911759	1	Organismal Systems	Endocrine system	gene5015|gene10970|gene930|gene2105|gene12027|gene7661|gene16801|gene1416	GPX7;ADCY7;LOC106037084;ADCY5;HSPA5;BLNK61;PRKCB;CREB3L1
3	map00563	Glycosylphosphatidylinositol (GPI)-anchor biosynthesis		KEGG PATHWAY	3/2172	27/11318	0.91393	1	Metabolism	Glycan biosynthesis and metabolism	gene9325|gene12794|gene11355	PIGA;PIGC;PGAP1
4	map04215	Apoptosis - multiple species		KEGG PATHWAY	4/2172	34/11318	0.914032	1	Cellular Processes	Cell growth and death	gene6988|gene16898|gene10080|gene8056	CASP3;BAK1;XIAP;PMAIP1
2	map03430	Mismatch repair		KEGG PATHWAY	2/2172	20/11318	0.919112	1	Genetic Information Processing	Replication and repair	gene1912|gene10566	EXO1;RFC1
8	map04720	Long-term potentiation		KEGG PATHWAY	8/2172	61/11318	0.920594	1	Organismal Systems	Nervous system	gene10183|gene4881|gene13457|gene12427|gene7661|gene16801|gene18515|gene8728	LOC106038708;GRIA1;CAMK4;GRIN2A;BLNK61;PRKCB;RPS6KA1;GRIN1
11	map04727	GABAergic synapse		KEGG PATHWAY	11/2172	81/11318	0.928641	1	Organismal Systems	Nervous system	gene10970|gene8697|gene14137|gene2105|gene2995|gene16801|gene6247|gene1792|gene9275|gene7691|gene12197	ADCY7;LOC106037044;GNAO1;ADCY5;GABRA4;PRKCB;GABRB2;SLC38A2;GABRE;BLNK91;SRC
6	map04975	Fat digestion and absorption		KEGG PATHWAY	6/2172	49/11318	0.929142	1	Organismal Systems	Digestive system	gene12296|gene19445|gene7318|gene11513|gene13512|gene11205	LOC106041043;NPC1L1;CD36;LOC106040243;DGAT2;LOC106039769
26	map04141	Protein processing in endoplasmic reticulum		KEGG PATHWAY	26/2172	172/11318	0.931993	1	Genetic Information Processing	Folding, sorting and degradation	gene11588|gene596|gene4090|gene1969|gene20089|gene13539|gene18385|gene18771|gene16259|gene8744|gene17700|gene5194|gene13022|gene19506|gene11109|gene16898|gene2555|gene7661|gene19854|gene8833|gene2637|gene6488|gene9370|gene12027|gene12381|gene8169	DNAJA1;WFS1;LOC106031985;EIF2AK2;DDIT3;HSPA4L;PSD85;LOC106048174;UBQLN1;TRAF2;HSP90AA1;HERPUD1;FAM175A;LOC106048968;HSPA8;BAK1;DNAJC1;BLNK61;UGGT2;HSPA2;BAG2;ERN1;MBTPS2;HSPA5;HSPH1;VIMP
10	map05211	Renal cell carcinoma		KEGG PATHWAY	10/2172	76/11318	0.937172	1	Human Diseases	Cancer: specific types	gene17031|gene14389|gene15263|gene7321|gene7841|gene17397|gene19020|gene4965|gene11894|gene5078	TGFA;ARNT2;LOC106044308;HGF;ETS2;GAB1;LOC10602987820;JUN;ETS1;PIK3R3
8	map04976	Bile secretion		KEGG PATHWAY	8/2172	64/11318	0.942665	1	Organismal Systems	Digestive system	gene10970|gene18879|gene10093|gene170|gene2105|gene5639|gene4109|gene3774	ADCY7;LOC106048282;LOC106038686;LOC106049164;ADCY5;AQP9;NCEH1;SLC10A1
10	map04721	Synaptic vesicle cycle		KEGG PATHWAY	10/2172	77/11318	0.943237	1	Organismal Systems	Nervous system	gene10243|gene2944|gene8686|gene14247|gene19563|gene5612|gene12795|gene3373|gene17969|gene16119	LOC106038813;ATP6V1C2;ATP6V1G1;ATP6V1B1;SLC6A9;UNC13C;DNM3;TCTN2;DNM1;SLC18A2
14	map04713	Circadian entrainment		KEGG PATHWAY	14/2172	103/11318	0.947512	1	Organismal Systems	Environmental adaptation	gene12762|gene10970|gene4881|gene9227|gene12427|gene6965|gene2105|gene14137|gene4367|gene16801|gene10183|gene10304|gene8728|gene4257	NOS1AP;ADCY7;GRIA1;GPR50;GRIN2A;MTNR1A;ADCY5;GNAO1;GUCY1A3;PRKCB;LOC106038708;FOS;GRIN1;CACNA1H
13	map04922	Glucagon signaling pathway		KEGG PATHWAY	13/2172	97/11318	0.94868	1	Organismal Systems	Endocrine system	gene17479|gene11155|gene3267|gene16232|gene10183|gene4973|gene2158|gene1416|gene4100|gene7661|gene12192|gene679|gene7793	GCGR;SIK2;ACACB;LOC106045365;LOC106038708;PRKAA2;GCG;CREB3L1;SLC2A2;BLNK61;PDE3B;PPARGC1A;SIK1
1	map00730	Thiamine metabolism		KEGG PATHWAY	1/2172	14/11318	0.94946	1	Metabolism	Metabolism of cofactors and vitamins	gene1856	NTPCR
3	map04130	SNARE interactions in vesicular transport		KEGG PATHWAY	3/2172	31/11318	0.953415	1	Genetic Information Processing	Folding, sorting and degradation	gene10962|gene12772|gene17423	STX11;SEC22B;STX8
48	map05010	Alzheimer disease		KEGG PATHWAY	48/2172	308/11318	0.958478	1	Human Diseases	Neurodegenerative disease	gene5643|gene15854|gene12283|gene16220|gene19671|gene3401|gene18661|gene11436|gene2407|gene1969|gene20855|gene16684|gene20089|gene13414|gene5078|gene13515|gene20213|gene16588|gene8744|gene7933|gene8702|gene16188|gene8439|gene10798|gene3414|gene8728|gene8965|gene20863|gene19549|gene13212|gene17378|gene10796|gene20864|gene3348|gene12427|gene7661|gene8062|gene17618|gene6775|gene6988|gene9629|gene132…	ADAM10;INSR;FZD9;DKK2;WNT4;FZD10;FZD4;WNT7A;IL6;EIF2AK2;LOC10603007855;LOC106045884;DDIT3;RTN4;PIK3R3;WNT11;IL1B;ULK2;TRAF2;IRS1;TUBB4B;NFKB1;WNT3A;WNT6;ULK1;GRIN1;NOX1;LOC10603007863;LRP1;CXCL1212;PIK3R4;WNT10A;LOC10603007864;LOC106031415;GRIN2A;BLNK61;LOC106036305;FZD2;TUBB6;CASP3;FZD3;CXCL1288;LOC106038708;LOC106030078;ERN1;FZD7;FZD1;PTGS2
12	map04350	TGF-beta signaling pathway		KEGG PATHWAY	12/2172	93/11318	0.958993	1	Environmental Information Processing	Signal transduction	gene2646|gene8539|gene15614|gene8920|gene2120|gene1270|gene16477|gene10138|gene9948|gene1982|gene14887|gene5173	BMP5;DCN;LOC106044678;SMAD7;LOC106029911;BMP7;LOC106045698;PITX2;MYC;LTBP1;ACVR1C;E2F4
17	map04140	Autophagy - animal		KEGG PATHWAY	17/2172	126/11318	0.964406	1	Cellular Processes	Transport and catabolism	gene16588|gene6488|gene12566|gene10220|gene10067|gene7933|gene17378|gene9991|gene16236|gene3414|gene4973|gene15892|gene12304|gene12086|gene13513|gene5711|gene5078	ULK2;ERN1;RAB7B;PRKCQ;LOC106038552;IRS1;PIK3R4;DEPTOR;DAPK1;ULK1;PRKAA2;LOC106044971;MTMR4;LOC106040774;UVRAG;DAPK2;PIK3R3
2	map03060	Protein export		KEGG PATHWAY	2/2172	25/11318	0.96643	1	Genetic Information Processing	Folding, sorting and degradation	gene4090|gene12027	LOC106031985;HSPA5
13	map04972	Pancreatic secretion		KEGG PATHWAY	13/2172	102/11318	0.968329	1	Organismal Systems	Digestive system	gene15822|gene10169|gene19934|gene10970|gene10171|gene15614|gene19495|gene3348|gene2105|gene5949|gene5948|gene16801|gene11513	RAB27B;LOC106038763;LOC106049424;ADCY7;LOC106038694;LOC106044678;RAB25;LOC106031415;ADCY5;LOC106034007;LOC106034001;PRKCB;LOC106040243
2	map04136	Autophagy - other		KEGG PATHWAY	2/2172	26/11318	0.971956	1	Cellular Processes	Transport and catabolism	gene16588|gene17378	ULK2;PIK3R4
2	map04744	Phototransduction		KEGG PATHWAY	2/2172	27/11318	0.976598	1	Organismal Systems	Sensory system	gene6456|gene10183	RGS9;LOC106038708
18	map00230	Purine metabolism		KEGG PATHWAY	18/2172	137/11318	0.976744	1	Metabolism	Nucleotide metabolism	gene16349|gene14604|gene2105|gene5923|gene226|gene13726|gene9706|gene2935|gene13049|gene1856|gene3122|gene4367|gene2984|gene7806|gene10970|gene12192|gene14963|gene4833	PDE1C;PDE4B;ADCY5;LOC106033995;PAPSS2;LOC106042626;ENPP4;RRM2;NUDT9;NTPCR;CECR1;GUCY1A3;LOC106030817;LGMN6;ADCY7;PDE3B;CD443;LOC106032673
8	map04911	Insulin secretion		KEGG PATHWAY	8/2172	72/11318	0.977369	1	Organismal Systems	Endocrine system	gene7323|gene10970|gene2105|gene4100|gene2158|gene16801|gene7661|gene1416	PCLO;ADCY7;ADCY5;SLC2A2;GCG;PRKCB;BLNK61;CREB3L1
17	map04261	Adrenergic signaling in cardiomyocytes		KEGG PATHWAY	17/2172	132/11318	0.979427	1	Organismal Systems	Circulatory system	gene989|gene14443|gene10183|gene9021|gene16418|gene3348|gene10250|gene4209|gene2105|gene15538|gene7661|gene16803|gene7870|gene16176|gene10970|gene3842|gene1416	MYH15;KCNE1;LOC106038708;AGTR2;SLC8A1;LOC106031415;PPP2R3C;LOC106032083;ADCY5;AGT;BLNK61;CACNG3;AGTR1;CREM;ADCY7;ACTC1;CREB3L1
2	map04745	Phototransduction - fly		KEGG PATHWAY	2/2172	28/11318	0.980492	1	Organismal Systems	Sensory system	gene20461|gene10183	ADRBK1;LOC106038708
2	map00030	Pentose phosphate pathway		KEGG PATHWAY	2/2172	28/11318	0.980492	1	Metabolism	Carbohydrate metabolism	gene3094|gene16232	DERA;LOC106045365
2	map04341	Hedgehog signaling pathway - fly		KEGG PATHWAY	2/2172	29/11318	0.983754	1	Environmental Information Processing	Signal transduction	gene556|gene16992	GRK4;CSNK1G3
4	map00970	Aminoacyl-tRNA biosynthesis		KEGG PATHWAY	4/2172	46/11318	0.985001	1	Genetic Information Processing	Translation	gene3713|gene4981|gene16533|gene691	IARS2;PARS2;WARS2;SEPSECS
12	map04066	HIF-1 signaling pathway		KEGG PATHWAY	12/2172	104/11318	0.987108	1	Environmental Information Processing	Signal transduction	gene7519|gene16801|gene13288|gene15854|gene19020|gene2407|gene20011|gene19453|gene16188|gene7584|gene10626|gene5078	IGF1;PRKCB;CXCL1288;INSR;LOC10602987820;IL6;LOC106049507;GCK;NFKB1;HMOX1;TF;PIK3R3
4	map03022	Basal transcription factors		KEGG PATHWAY	4/2172	47/11318	0.987148	1	Genetic Information Processing	Transcription	gene16553|gene12341|gene12342|gene5678	GTF2E1;GTF2I;GTF2IRD1;GTF2A2
4	map05110	Vibrio cholerae infection		KEGG PATHWAY	4/2172	48/11318	0.989001	1	Human Diseases	Infectious disease: bacterial	gene14247|gene3373|gene2944|gene8686	ATP6V1B1;TCTN2;ATP6V1C2;ATP6V1G1
17	map04120	Ubiquitin mediated proteolysis		KEGG PATHWAY	17/2172	140/11318	0.990561	1	Genetic Information Processing	Folding, sorting and degradation	gene8763|gene15178|gene16847|gene3340|gene17471|gene347|gene10080|gene978|gene16499|gene4338|gene5624|gene2505|gene10599|gene12883|gene12442|gene6630|gene5872	LOC106037125;PML;LOC106046070;ANAPC5;SOCS3;RHOBTB1;XIAP;CBLB;FZR1;LOC106032252;NEDD4;LOC106030278;ANAPC13;NHLRC1;SOCS1;UBE2O;CDC20
1	map04964	Proximal tubule bicarbonate reclamation		KEGG PATHWAY	1/2172	22/11318	0.990837	1	Organismal Systems	Excretory system	gene17556	CA4
5	map03460	Fanconi anemia pathway		KEGG PATHWAY	5/2172	58/11318	0.992087	1	Genetic Information Processing	Replication and repair	gene540|gene1996|gene16927|gene18818|gene539	HAUS3;POLH;FANCE;FANCB;POLN
3	map00513	Various types of N-glycan biosynthesis		KEGG PATHWAY	3/2172	43/11318	0.993553	1	Metabolism	Glycan biosynthesis and metabolism	gene7446|gene17713|gene16667	MGAT4A;B4GALNT4;LOC106045877
15	map04919	Thyroid hormone signaling pathway		KEGG PATHWAY	15/2172	131/11318	0.99393	1	Organismal Systems	Endocrine system	gene12815|gene989|gene19671|gene16763|gene2495|gene3348|gene4209|gene9948|gene14442|gene12197|gene16801|gene11333|gene5078|gene15493|gene10808	RXRG;MYH15;WNT4;ITGB3;KAT2B;LOC106031415;LOC106032083;MYC;RCAN1;SRC;PRKCB;STAT1;PIK3R3;DIO2;PLCD4
7	map00562	Inositol phosphate metabolism		KEGG PATHWAY	7/2172	76/11318	0.994705	1	Metabolism	Carbohydrate metabolism	gene14041|gene10808|gene14042|gene12304|gene11669|gene3752|gene14581	CHST11;PLCD4;CHST12;MTMR4;INPP5D;ITPKB;PLCH1
6	map04260	Cardiac muscle contraction		KEGG PATHWAY	6/2172	69/11318	0.995118	1	Organismal Systems	Circulatory system	gene989|gene3348|gene4209|gene16418|gene16803|gene3842	MYH15;LOC106031415;LOC106032083;SLC8A1;CACNG3;ACTC1
3	map03420	Nucleotide excision repair		KEGG PATHWAY	3/2172	45/11318	0.995432	1	Genetic Information Processing	Replication and repair	gene11583|gene10566|gene18126	XPA;RFC1;POLE
15	map04723	Retrograde endocannabinoid signaling		KEGG PATHWAY	15/2172	136/11318	0.996505	1	Organismal Systems	Nervous system	gene9602|gene5990|gene10970|gene4881|gene20863|gene20864|gene7164|gene14137|gene9571|gene2105|gene2995|gene20855|gene16801|gene6247|gene9275	MGLL;PTGS2;ADCY7;GRIA1;LOC10603007863;LOC10603007864;CNR1;GNAO1;ABHD6;ADCY5;GABRA4;LOC10603007855;PRKCB;GABRB2;GABRE
23	map04530	Tight junction		KEGG PATHWAY	23/2172	191/11318	0.997094	1	Cellular Processes	Cellular community - eukaryotes	gene19675|gene15946|gene15614|gene4965|gene5624|gene16684|gene12308|gene4734|gene17870|gene1990|gene6138|gene5195|gene2360|gene16183|gene4973|gene14438|gene19851|gene7238|gene12197|gene20322|gene6562|gene16293|gene18748	CLDN19;EPB41L4B;LOC106044678;JUN;NEDD4;LOC106045884;LOC106041034;HPSE234;LOC106047195;TJAP1;CLDN20;PARD6A;MPP4;PARD3;PRKAA2;RUNX1;CLDN10;MAGI1;SRC;CGN;LOC106034617;MYL9;LOC106048163
10	map04725	Cholinergic synapse		KEGG PATHWAY	10/2172	103/11318	0.997266	1	Organismal Systems	Nervous system	gene2598|gene10970|gene10304|gene13457|gene14137|gene1416|gene2105|gene7661|gene16801|gene5078	KCNQ5;ADCY7;FOS;CAMK4;GNAO1;CREB3L1;ADCY5;BLNK61;PRKCB;PIK3R3
15	map04932	Non-alcoholic fatty liver disease (NAFLD)		KEGG PATHWAY	15/2172	139/11318	0.997512	1	Human Diseases	Endocrine and metabolic disease	gene6988|gene15854|gene20213|gene6488|gene17471|gene7933|gene4965|gene2407|gene8744|gene4973|gene7661|gene16188|gene20089|gene5078|gene3131	CASP3;INSR;IL1B;ERN1;SOCS3;IRS1;JUN;IL6;TRAF2;PRKAA2;BLNK61;NFKB1;DDIT3;PIK3R3;DNA21
11	map04728	Dopaminergic synapse		KEGG PATHWAY	11/2172	113/11318	0.998082	1	Organismal Systems	Nervous system	gene10250|gene10183|gene4881|gene14137|gene2105|gene7661|gene12427|gene16801|gene10304|gene16119|gene1416	PPP2R3C;LOC106038708;GRIA1;GNAO1;ADCY5;BLNK61;GRIN2A;PRKCB;FOS;SLC18A2;CREB3L1
2	map03440	Homologous recombination		KEGG PATHWAY	2/2172	41/11318	0.998298	1	Genetic Information Processing	Replication and repair	gene9871|gene13022	TOPBP1;FAM175A
1	map00020	Citrate cycle (TCA cycle)		KEGG PATHWAY	1/2172	31/11318	0.99866	1	Metabolism	Carbohydrate metabolism	gene390	OGDHL
23	map04714	Thermogenesis		KEGG PATHWAY	23/2172	201/11318	0.998946	1	Organismal Systems	Environmental adaptation	gene19553|gene7164|gene2158|gene20855|gene9769|gene6985|gene679|gene2716|gene4973|gene20864|gene18515|gene20863|gene10056|gene1381|gene10970|gene3893|gene9602|gene2105|gene4029|gene4218|gene8086|gene712|gene1416	SMARCD3;CNR1;GCG;LOC10603007855;LOC106038244;ACSL1;PPARGC1A;NDUFAF6;PRKAA2;LOC10603007864;RPS6KA1;LOC10603007863;ACSL4;NDUFAF1;ADCY7;PNPLA2;MGLL;ADCY5;ACSL5;MAP2K3;PLIN1;SLC25A29;CREB3L1
4	map03018	RNA degradation		KEGG PATHWAY	4/2172	67/11318	0.999519	1	Genetic Information Processing	Folding, sorting and degradation	gene16639|gene11359|gene3127|gene8541	BTG2;HSPD1;LOC106030932;BTG1
2	map00510	N-Glycan biosynthesis		KEGG PATHWAY	2/2172	48/11318	0.99956	1	Metabolism	Glycan biosynthesis and metabolism	gene7446|gene16667	MGAT4A;LOC106045877
1	map03050	Proteasome		KEGG PATHWAY	1/2172	37/11318	0.999628	1	Genetic Information Processing	Folding, sorting and degradation	gene5721	HYKK
8	map00190	Oxidative phosphorylation		KEGG PATHWAY	8/2172	108/11318	0.999843	1	Metabolism	Energy metabolism	gene2944|gene8686|gene14247|gene11942|gene20863|gene20864|gene3373|gene20855	ATP6V1C2;ATP6V1G1;ATP6V1B1;ATP12A;LOC10603007863;LOC10603007864;TCTN2;LOC10603007855
4	map03015	mRNA surveillance pathway		KEGG PATHWAY	4/2172	81/11318	0.999959	1	Genetic Information Processing	Translation	gene18801|gene17191|gene10250|gene1262	LOC106048219;UPF3A;PPP2R3C;CSTF1
6	map03040	Spliceosome		KEGG PATHWAY	6/2172	109/11318	0.999992	1	Genetic Information Processing	Transcription	gene9861|gene20224|gene8833|gene15867|gene3775|gene11109	SNRPD1;PPIH;HSPA2;LOC10604815367;SRSF5;HSPA8
24	map05016	Huntington disease		KEGG PATHWAY	24/2172	255/11318	0.999995	1	Human Diseases	Neurodegenerative disease	gene3375|gene4881|gene20855|gene16684|gene6988|gene16588|gene5015|gene8744|gene5467|gene8702|gene679|gene3414|gene8728|gene16085|gene17469|gene17378|gene20863|gene20864|gene17689|gene6775|gene4861|gene6488|gene14258|gene1416	DNAH10;GRIA1;LOC10603007855;LOC106045884;CASP3;ULK2;GPX7;TRAF2;DNAH3;TUBB4B;PPARGC1A;ULK1;GRIN1;DNAI1;DNAH17;PIK3R4;LOC10603007863;LOC10603007864;RCOR1;TUBB6;DCTN4;ERN1;NOP56;CREB3L1
7	map05012	Parkinson disease		KEGG PATHWAY	7/2172	122/11318	0.999996	1	Human Diseases	Neurodegenerative disease	gene6988|gene20864|gene20863|gene16999|gene2105|gene20855|gene16119	CASP3;LOC10603007864;LOC10603007863;SNCAIP;ADCY5;LOC10603007855;SLC18A2
7	map03008	Ribosome biogenesis in eukaryotes		KEGG PATHWAY	7/2172	137/11318	1	1	Genetic Information Processing	Translation	gene7041|gene14258|gene8304|gene7174|gene7782|gene12315|gene6501	POP1;NOP56;XPO1;MDN1;PWP2;SBDS;UTP6
3	map03010	Ribosome		KEGG PATHWAY	3/2172	110/11318	1	1	Genetic Information Processing	Translation	gene14449|gene2005|gene3660	MRPS6;MRPL14;MRPS10
7	map04740	Olfactory transduction		KEGG PATHWAY	7/2172	156/11318	1	1	Organismal Systems	Sensory system	gene18849|gene16349|gene20461|gene18749|gene10183|gene16418|gene7452	LOC106048249;PDE1C;ADRBK1;LOC106048164;LOC106038708;SLC8A1;CNGA3

## Sheet: 70vs120-KEGG
Num	Pathway id	Description	Database	Ratio_in_study	Ratio_in_pop	Pvalue	Padjust	First Category	Second Category	Gene_ids	Gene_names
22	map05418	Fluid shear stress and atherosclerosis	KEGG PATHWAY	22/408	136/11318	2.95645e-09	8.48502e-07	Human Diseases	Cardiovascular disease	gene12268|gene15614|gene10690|gene4965|gene7584|gene7029|gene17850|gene12205|gene20213|gene16763|gene16188|gene17700|gene4973|gene2666|gene12197|gene12814|gene10304|gene7530|gene12857|gene13386|gene15871|gene13852	ACVR2A;LOC106044678;GPC1;JUN;HMOX1;SDC2;MMP9;SDC4;IL1B;ITGB3;NFKB1;HSP90AA1;PRKAA2;LOC106030436;SRC;LOC106041602;FOS;HSP90B1;LOC106041672;THBD;KLF2;DUSP1
14	map04657	IL-17 signaling pathway	KEGG PATHWAY	14/408	90/11318	3.71544e-06	0.000533165	Organismal Systems	Immune system	gene20213|gene4606|gene5597|gene4565|gene10304|gene4965|gene7530|gene16188|gene17700|gene6009|gene6007|gene20646|gene17850|gene19641	IL1B;TRAF3IP2;MAPK6;TNFAIP3;FOS;JUN;HSP90B1;NFKB1;HSP90AA1;LOC106034204;LOC106034136;LOC106029507;MMP9;LOC106049124
14	map04928	Parathyroid hormone synthesis, secretion and action	KEGG PATHWAY	14/408	94/11318	6.28233e-06	0.000601009	Organismal Systems	Endocrine system	gene12815|gene7391|gene8116|gene4693|gene7316|gene10304|gene15614|gene19020|gene15359|gene4102|gene13840|gene14604|gene20082|gene14895	RXRG;PDE4D;AKAP13;EGR1;GNAI1;FOS;LOC106044678;CDKN1A;FGFR1;PLD1;HBEGF;PDE4B;VDR;NR4A2
22	map05205	Proteoglycans in cancer	KEGG PATHWAY	22/408	229/11318	2.71761e-05	0.00155991	Human Diseases	Cancer: overview	gene15614|gene10690|gene7029|gene17850|gene12205|gene16171|gene13515|gene16763|gene7321|gene15359|gene13840|gene9948|gene13212|gene978|gene12509|gene12197|gene1496|gene1497|gene3818|gene19456|gene19020|gene6346	LOC106044678;GPC1;SDC2;MMP9;SDC4;FZD8;WNT11;ITGB3;HGF;FGFR1;HBEGF;MYC;CXCL1212;CBLB;WNT2B;SRC;CD44;LOC106044451;THBS1;FLNC;CDKN1A;FN1
9	map00520	Amino sugar and nucleotide sugar metabolism	KEGG PATHWAY	9/408	45/11318	2.63181e-05	0.00188832	Metabolism	Carbohydrate metabolism	gene5831|gene12760|gene16641|gene16642|gene15045|gene16452|gene19453|gene4826|gene10570	LOC106033848;UAP1;LOC106045866;LOC106045865;CAT5;UGP2;GCK;GFPT2;UGDH
24	map04010	MAPK signaling pathway	KEGG PATHWAY	24/408	278/11318	6.74597e-05	0.00322682	Environmental Information Processing	Signal transduction	gene12661|gene13078|gene4965|gene13882|gene20213|gene18995|gene7321|gene5780|gene18243|gene4014|gene15359|gene9948|gene9821|gene18365|gene16188|gene11109|gene16250|gene13729|gene10304|gene19456|gene18252|gene12857|gene8833|gene13852	HSPB1;AREG;JUN;DUSP7;IL1B;CSF1;HGF;BDNF;FGF12;DUSP5;FGFR1;MYC;NFATC1;ATG101;NFKB1;HSPA8;NTRK2;DUSP8;FOS;FLNC;IL1RAP;LOC106041672;HSPA2;DUSP1
20	map04024	cAMP signaling pathway	KEGG PATHWAY	20/408	215/11318	9.84712e-05	0.00353265	Environmental Information Processing	Signal transduction	gene13258|gene16632|gene7391|gene4298|gene5780|gene16525|gene7316|gene10304|gene15614|gene4965|gene3348|gene4102|gene18304|gene9821|gene7410|gene16188|gene6436|gene14604|gene576|gene6432	CXCL1258;ATP2B4;PDE4D;HHIP;BDNF;AMH;GNAI1;FOS;LOC106044678;JUN;LOC106031415;PLD1;SUCNR1;NFATC1;HTR1A;NFKB1;SOX9;PDE4B;ACOX3;SSTR2
17	map05206	MicroRNAs in cancer	KEGG PATHWAY	17/408	164/11318	8.70363e-05	0.00356849	Human Diseases	Cancer: overview	gene8680|gene1496|gene1497|gene3818|gene15062|gene15614|gene20276|gene19020|gene9948|gene16188|gene16946|gene11909|gene7584|gene1971|gene20501|gene17850|gene16763	TNC;CD44;LOC106044451;THBS1;ABL1;LOC106044678;S1PR2;CDKN1A;MYC;NFKB1;LOC106046136;ST14;HMOX1;LOC106029463;LOC106029353;MMP9;ITGB3
8	map05219	Bladder cancer	KEGG PATHWAY	8/408	44/11318	0.000150831	0.00480982	Human Diseases	Cancer: specific types	gene3818|gene19020|gene5711|gene13840|gene9948|gene6009|gene17850|gene12197	THBS1;CDKN1A;DAPK2;HBEGF;MYC;LOC106034204;MMP9;SRC
12	map04512	ECM-receptor interaction	KEGG PATHWAY	12/408	98/11318	0.000201469	0.00578215	Environmental Information Processing	Signaling molecules and interaction	gene8680|gene1496|gene1497|gene16763|gene3818|gene7318|gene6346|gene15519|gene20084|gene2150|gene12205|gene17377	TNC;CD44;LOC106044451;ITGB3;THBS1;CD36;FN1;THBS2;COL2A1;ITGB6;SDC4;COL6A6
26	map04151	PI3K-Akt signaling pathway	KEGG PATHWAY	26/408	339/11318	0.000235686	0.00614926	Environmental Information Processing	Signal transduction	gene18995|gene8680|gene13078|gene20084|gene2150|gene10590|gene16763|gene7321|gene5780|gene18243|gene15359|gene9948|gene18365|gene16188|gene17700|gene13258|gene17377|gene4973|gene16250|gene15519|gene3818|gene19020|gene7530|gene9522|gene6346|gene20501	CSF1;TNC;AREG;COL2A1;ITGB6;PPP2R3A;ITGB3;HGF;BDNF;FGF12;FGFR1;MYC;ATG101;NFKB1;HSP90AA1;CXCL1258;COL6A6;PRKAA2;NTRK2;THBS2;THBS1;CDKN1A;HSP90B1;CSF3R;FN1;LOC106029353
10	map04920	Adipocytokine signaling pathway	KEGG PATHWAY	10/408	73/11318	0.000270536	0.00647033	Organismal Systems	Endocrine system	gene12815|gene11543|gene3267|gene17471|gene10056|gene6985|gene18977|gene4973|gene7318|gene16188	RXRG;TNFRSF1B;ACACB;SOCS3;ACSL4;ACSL1;ACSBG2;PRKAA2;CD36;NFKB1
12	map04380	Osteoclast differentiation	KEGG PATHWAY	12/408	104/11318	0.000353009	0.00779335	Organismal Systems	Development and regeneration	gene20213|gene16763|gene18995|gene17471|gene10304|gene4965|gene1227|gene9821|gene16188|gene20646|gene12857|gene2053	IL1B;ITGB3;CSF1;SOCS3;FOS;JUN;NFATC2;NFATC1;NFKB1;LOC106029507;LOC106041672;FOSL2
11	map03320	PPAR signaling pathway	KEGG PATHWAY	11/408	93/11318	0.00049855	0.0102203	Organismal Systems	Endocrine system	gene12815|gene10056|gene6985|gene18977|gene16053|gene7318|gene2802|gene6009|gene10595|gene18929|gene576	RXRG;ACSL4;ACSL1;ACSBG2;FABP3;CD36;LOC106030656;LOC106034204;EHHADH;PLIN2;ACOX3
11	map04668	TNF signaling pathway	KEGG PATHWAY	11/408	102/11318	0.00109111	0.0208766	Environmental Information Processing	Signal transduction	gene12814|gene20213|gene11543|gene6007|gene18995|gene17471|gene4565|gene10304|gene4965|gene16188|gene17850	LOC106041602;IL1B;TNFRSF1B;LOC106034136;CSF1;SOCS3;TNFAIP3;FOS;JUN;NFKB1;MMP9
17	map04060	Cytokine-cytokine receptor interaction	KEGG PATHWAY	17/408	205/11318	0.00119814	0.0214917	Environmental Information Processing	Signaling molecules and interaction	gene20213|gene132|gene12290|gene12268|gene12788|gene20740|gene18995|gene4789|gene16525|gene18252|gene12857|gene16692|gene9522|gene923|gene12056|gene11543|gene16394	IL1B;CXCL12;LOC106041041;ACVR2A;LOC106041570;CLCF1;CSF1;CXCL14;AMH;IL1RAP;LOC106041672;LOC106045913;CSF3R;LOC106038263;TNFRSF6B;TNFRSF1B;EDA2R
32	map05200	Pathways in cancer	KEGG PATHWAY	32/408	513/11318	0.00175892	0.0296946	Human Diseases	Cancer: overview	gene15614|gene4965|gene4102|gene7584|gene17850|gene16171|gene13515|gene7321|gene18243|gene15094|gene15359|gene132|gene9948|gene16188|gene17700|gene13258|gene15062|gene13212|gene2666|gene5711|gene978|gene12509|gene6009|gene7316|gene12815|gene10304|gene19020|gene7530|gene9522|gene16946|gene4298|gene6346	LOC106044678;JUN;PLD1;HMOX1;MMP9;FZD8;WNT11;HGF;FGF12;RALGDS;FGFR1;CXCL12;MYC;NFKB1;HSP90AA1;CXCL1258;ABL1;CXCL1212;LOC106030436;DAPK2;CBLB;WNT2B;LOC106034204;GNAI1;RXRG;FOS;CDKN1A;HSP90B1;CSF3R;LOC106046136;HHIP;FN1
4	map00061	Fatty acid biosynthesis	KEGG PATHWAY	4/408	16/11318	0.00214491	0.0341995	Metabolism	Lipid metabolism	gene10056|gene3267|gene18977|gene6985	ACSL4;ACACB;ACSBG2;ACSL1
16	map05163	Human cytomegalovirus infection	KEGG PATHWAY	16/408	204/11318	0.0029139	0.0440152	Human Diseases	Infectious disease: viral	gene20213|gene132|gene12290|gene16763|gene15614|gene19020|gene14127|gene12857|gene16692|gene9948|gene9821|gene16188|gene1227|gene7316|gene12197|gene8116	IL1B;CXCL12;LOC106041041;ITGB3;LOC106044678;CDKN1A;BCAR1;LOC106041672;LOC106045913;MYC;NFATC1;NFKB1;NFATC2;GNAI1;SRC;AKAP13
7	map05144	Malaria	KEGG PATHWAY	7/408	55/11318	0.00342383	0.0491319	Human Diseases	Infectious disease: parasitic	gene20213|gene12814|gene3818|gene7321|gene7318|gene15519|gene7029	IL1B;LOC106041602;THBS1;HGF;CD36;THBS2;SDC2
9	map04640	Hematopoietic cell lineage	KEGG PATHWAY	9/408	89/11318	0.00468245	0.0639935	Organismal Systems	Immune system	gene20213|gene1497|gene16763|gene18995|gene16336|gene12857|gene9522|gene7318|gene1496	IL1B;LOC106044451;ITGB3;CSF1;CD9;LOC106041672;CSF3R;CD36;CD44
9	map04012	ErbB signaling pathway	KEGG PATHWAY	9/408	89/11318	0.00468245	0.0639935	Environmental Information Processing	Signal transduction	gene17756|gene15062|gene13078|gene19020|gene4965|gene978|gene13840|gene9948|gene12197	PAK6;ABL1;AREG;CDKN1A;JUN;CBLB;HBEGF;MYC;SRC
10	map04659	Th17 cell differentiation	KEGG PATHWAY	10/408	107/11318	0.00518229	0.0646659	Organismal Systems	Immune system	gene20213|gene12815|gene10304|gene4965|gene18252|gene1227|gene9821|gene16188|gene17700|gene12857	IL1B;RXRG;FOS;JUN;IL1RAP;NFATC2;NFATC1;NFKB1;HSP90AA1;LOC106041672
9	map04350	TGF-beta signaling pathway	KEGG PATHWAY	9/408	93/11318	0.00624975	0.0717471	Environmental Information Processing	Signal transduction	gene12268|gene3818|gene8127|gene8920|gene6732|gene15614|gene16525|gene9948|gene16022	ACVR2A;THBS1;RGMA;SMAD7;TGIF1;LOC106044678;AMH;MYC;LOC106045127
16	map04510	Focal adhesion	KEGG PATHWAY	16/408	220/11318	0.00605815	0.0724454	Cellular Processes	Cellular community - eukaryotes	gene8680|gene17756|gene3818|gene7321|gene15614|gene19456|gene4965|gene16763|gene14127|gene6346|gene15519|gene20084|gene2150|gene10996|gene12197|gene17377	TNC;PAK6;THBS1;HGF;LOC106044678;FLNC;JUN;ITGB3;BCAR1;FN1;THBS2;COL2A1;ITGB6;MYLK3;SRC;COL6A6
10	map04915	Estrogen signaling pathway	KEGG PATHWAY	10/408	117/11318	0.00959236	0.105885	Organismal Systems	Endocrine system	gene10304|gene4965|gene7530|gene13840|gene11109|gene17700|gene8833|gene17850|gene7316|gene12197	FOS;JUN;HSP90B1;HBEGF;HSPA8;HSP90AA1;HSPA2;MMP9;GNAI1;SRC
4	map00040	Pentose and glucuronate interconversions	KEGG PATHWAY	4/408	25/11318	0.0115447	0.114253	Metabolism	Carbohydrate metabolism	gene8506|gene16452|gene3107|gene10570	XYLB;UGP2;LOC106030918;UGDH
9	map04625	C-type lectin receptor signaling pathway	KEGG PATHWAY	9/408	102/11318	0.0112305	0.119376	Organismal Systems	Immune system	gene20213|gene15614|gene4965|gene1227|gene9821|gene16188|gene17067|gene12197|gene5106	IL1B;LOC106044678;JUN;NFATC2;NFATC1;NFKB1;LOC106046287;SRC;PLK3
9	map04933	AGE-RAGE signaling pathway in diabetic complications	KEGG PATHWAY	9/408	102/11318	0.0112305	0.119376	Human Diseases	Endocrine and metabolic disease	gene12814|gene4693|gene20213|gene4965|gene13386|gene9821|gene16946|gene16188|gene6346	LOC106041602;EGR1;IL1B;JUN;THBD;NFATC1;LOC106046136;NFKB1;FN1
11	map04310	Wnt signaling pathway	KEGG PATHWAY	11/408	145/11318	0.015741	0.141177	Environmental Information Processing	Signal transduction	gene15614|gene13212|gene4965|gene1227|gene9948|gene1814|gene16686|gene9821|gene12509|gene16171|gene13515	LOC106044678;CXCL1212;JUN;NFATC2;MYC;PRICKLE1;LGR6;NFATC1;WNT2B;FZD8;WNT11
12	map04390	Hippo signaling pathway	KEGG PATHWAY	12/408	166/11318	0.0169801	0.143332	Environmental Information Processing	Signal transduction	gene9948|gene8920|gene13078|gene13212|gene16525|gene15511|gene12509|gene12635|gene4522|gene14962|gene16171|gene13515	MYC;SMAD7;AREG;CXCL1212;AMH;FRMD1;WNT2B;LOC106041489;CTGF;MOB1B;FZD8;WNT11
4	map05020	Prion diseases	KEGG PATHWAY	4/408	27/11318	0.0151382	0.144822	Human Diseases	Neurodegenerative disease	gene20213|gene4693|gene12027|gene8620	IL1B;EGR1;HSPA5;NCAM2
8	map05323	Rheumatoid arthritis	KEGG PATHWAY	8/408	90/11318	0.0157225	0.14556	Human Diseases	Immune disease	gene20213|gene18995|gene10304|gene4965|gene132|gene6009|gene6007|gene1071	IL1B;CSF1;FOS;JUN;CXCL12;LOC106034204;LOC106034136;CD80
5	map00071	Fatty acid degradation	KEGG PATHWAY	5/408	42/11318	0.0168791	0.146797	Metabolism	Lipid metabolism	gene576|gene10595|gene10056|gene6985|gene18977	ACOX3;EHHADH;ACSL4;ACSL1;ACSBG2
5	map05030	Cocaine addiction	KEGG PATHWAY	5/408	43/11318	0.018552	0.152127	Human Diseases	Substance dependence	gene20646|gene7316|gene4965|gene16188|gene5780	LOC106029507;GNAI1;JUN;NFKB1;BDNF
4	map01523	Antifolate resistance	KEGG PATHWAY	4/408	30/11318	0.0217277	0.168536	Human Diseases	Drug resistance: antineoplastic	gene20213|gene19688|gene16188|gene14460	IL1B;SLC46A1;NFKB1;LOC106043431
11	map04921	Oxytocin signaling pathway	KEGG PATHWAY	11/408	152/11318	0.0215881	0.172105	Organismal Systems	Endocrine system	gene15614|gene4973|gene10304|gene19020|gene4965|gene1227|gene14442|gene9821|gene7316|gene10996|gene12197	LOC106044678;PRKAA2;FOS;CDKN1A;JUN;NFATC2;RCAN1;NFATC1;GNAI1;MYLK3;SRC
5	map00480	Glutathione metabolism	KEGG PATHWAY	5/408	46/11318	0.0242137	0.182878	Metabolism	Metabolism of other amino acids	gene2941|gene2666|gene3517|gene12470|gene1388	ODC1;LOC106030436;GGT1;HPGDS;CHAC1
3	map00770	Pantothenate and CoA biosynthesis	KEGG PATHWAY	3/408	18/11318	0.0253686	0.186687	Metabolism	Metabolism of cofactors and vitamins	gene14372|gene16324|gene4534	GADL1;BCAT1;LOC106032501
2	map00430	Taurine and hypotaurine metabolism	KEGG PATHWAY	2/408	8/11318	0.0314274	0.204992	Metabolism	Metabolism of other amino acids	gene14372|gene3517	GADL1;GGT1
10	map04514	Cell adhesion molecules (CAMs)	KEGG PATHWAY	10/408	141/11318	0.0312849	0.208809	Environmental Information Processing	Signaling molecules and interaction	gene12814|gene16048|gene13809|gene20306|gene18075|gene19851|gene8620|gene1071|gene7029|gene12205	LOC106041602;SDC3;VCAN;LOC106049813;CNTNAP2;CLDN10;NCAM2;CD80;SDC2;SDC4
8	map05215	Prostate cancer	KEGG PATHWAY	8/408	101/11318	0.0292448	0.209832	Human Diseases	Cancer: specific types	gene6007|gene19020|gene7530|gene15359|gene1942|gene16188|gene17700|gene17850	LOC106034136;CDKN1A;HSP90B1;FGFR1;SRD5A2;NFKB1;HSP90AA1;MMP9
6	map05133	Pertussis	KEGG PATHWAY	6/408	66/11318	0.0312006	0.218404	Human Diseases	Infectious disease: bacterial	gene20213|gene15614|gene10304|gene4965|gene16188|gene7316	IL1B;LOC106044678;FOS;JUN;NFKB1;GNAI1
6	map05217	Basal cell carcinoma	KEGG PATHWAY	6/408	66/11318	0.0312006	0.218404	Human Diseases	Cancer: specific types	gene13212|gene19020|gene12509|gene4298|gene16171|gene13515	CXCL1212;CDKN1A;WNT2B;HHIP;FZD8;WNT11
4	map04216	Ferroptosis	KEGG PATHWAY	4/408	36/11318	0.0394985	0.251913	Cellular Processes	Cell growth and death	gene3210|gene10056|gene6985|gene7584	LOC106031011;ACSL4;ACSL1;HMOX1
10	map05224	Breast cancer	KEGG PATHWAY	10/408	149/11318	0.0431173	0.269015	Human Diseases	Cancer: specific types	gene13212|gene18243|gene10304|gene19020|gene4965|gene12509|gene9948|gene15359|gene16171|gene13515	CXCL1212;FGF12;FOS;CDKN1A;JUN;WNT2B;MYC;FGFR1;FZD8;WNT11
7	map05210	Colorectal cancer	KEGG PATHWAY	7/408	91/11318	0.0457541	0.279392	Human Diseases	Cancer: specific types	gene15614|gene13078|gene10304|gene19020|gene4965|gene15094|gene9948	LOC106044678;AREG;FOS;CDKN1A;JUN;RALGDS;MYC
5	map05134	Legionellosis	KEGG PATHWAY	5/408	55/11318	0.0473974	0.283397	Human Diseases	Infectious disease: bacterial	gene20213|gene8833|gene12081|gene11109|gene16188	IL1B;HSPA2;EEF1A2;HSPA8;NFKB1
13	map04810	Regulation of actin cytoskeleton	KEGG PATHWAY	13/408	216/11318	0.0490683	0.2874	Cellular Processes	Cell motility	gene13258|gene17756|gene16763|gene10674|gene15614|gene18243|gene14127|gene15359|gene132|gene6346|gene2150|gene10996|gene12197	CXCL1258;PAK6;ITGB3;ARHGEF4;LOC106044678;FGF12;BCAR1;FGFR1;CXCL12;FN1;ITGB6;MYLK3;SRC
13	map04015	Rap1 signaling pathway	KEGG PATHWAY	13/408	219/11318	0.0536675	0.302011	Environmental Information Processing	Signal transduction	gene16609|gene13258|gene7321|gene16763|gene18995|gene15614|gene18243|gene15094|gene14127|gene15359|gene7316|gene12197|gene3818	ADORA2B;CXCL1258;HGF;ITGB3;CSF1;LOC106044678;FGF12;RALGDS;BCAR1;FGFR1;GNAI1;SRC;THBS1
8	map04722	Neurotrophin signaling pathway	KEGG PATHWAY	8/408	114/11318	0.0535969	0.307646	Organismal Systems	Nervous system	gene15062|gene15614|gene5780|gene4965|gene16250|gene16484|gene16188|gene8347	ABL1;LOC106044678;BDNF;JUN;NTRK2;MATK;NFKB1;IRAK2
8	map04071	Sphingolipid signaling pathway	KEGG PATHWAY	8/408	117/11318	0.0606419	0.334697	Environmental Information Processing	Signal transduction	gene15614|gene230|gene4102|gene6629|gene16188|gene20276|gene7316|gene10590	LOC106044678;ASAH2;PLD1;SPHK1;NFKB1;S1PR2;GNAI1;PPP2R3A
8	map04926	Relaxin signaling pathway	KEGG PATHWAY	8/408	118/11318	0.0631136	0.341766	Organismal Systems	Endocrine system	gene8042|gene10304|gene4965|gene16188|gene6009|gene17850|gene7316|gene12197	RXFP3;FOS;JUN;NFKB1;LOC106034204;MMP9;GNAI1;SRC
10	map05161	Hepatitis B	KEGG PATHWAY	10/408	162/11318	0.0682549	0.349806	Human Diseases	Infectious disease: viral	gene13265|gene10304|gene19020|gene4965|gene1227|gene9948|gene9821|gene16188|gene17850|gene12197	CXCL1265;FOS;CDKN1A;JUN;NFATC2;MYC;NFATC1;NFKB1;MMP9;SRC
1	map00660	C5-Branched dibasic acid metabolism	KEGG PATHWAY	1/408	2/11318	0.0708011	0.350343	Metabolism	Carbohydrate metabolism	gene14921	IRG1
2	map00920	Sulfur metabolism	KEGG PATHWAY	2/408	12/11318	0.0673924	0.351666	Metabolism	Energy metabolism	gene7603|gene226	MPST;PAPSS2
9	map04550	Signaling pathways regulating pluripotency of stem cells	KEGG PATHWAY	9/408	140/11318	0.0663458	0.352615	Cellular Processes	Cellular community - eukaryotes	gene12268|gene13212|gene12509|gene9948|gene15359|gene11745|gene16022|gene16171|gene13515	ACVR2A;CXCL1212;WNT2B;MYC;FGFR1;KLF4;LOC106045127;FZD8;WNT11
4	map00380	Tryptophan metabolism	KEGG PATHWAY	4/408	44/11318	0.0729762	0.354986	Metabolism	Amino acid metabolism	gene1971|gene10595|gene1504|gene20429	LOC106029463;EHHADH;CAT;IL4I1
10	map04062	Chemokine signaling pathway	KEGG PATHWAY	10/408	163/11318	0.0705076	0.355012	Organismal Systems	Immune system	gene132|gene12290|gene4789|gene15614|gene14127|gene923|gene16692|gene16188|gene7316|gene12197	CXCL12;LOC106041041;CXCL14;LOC106044678;BCAR1;LOC106038263;LOC106045913;NFKB1;GNAI1;SRC
11	map05202	Transcriptional misregulation in cancer	KEGG PATHWAY	11/408	188/11318	0.07795	0.360833	Human Diseases	Cancer: overview	gene12815|gene19337|gene7713|gene968|gene6007|gene16522|gene19020|gene9948|gene16188|gene17850|gene10560	RXRG;ETV4;NR4A3;NFKBIZ;LOC106034136;DOT1L;CDKN1A;MYC;NFKB1;MMP9;KLF3
4	map00270	Cysteine and methionine metabolism	KEGG PATHWAY	4/408	45/11318	0.0779283	0.372757	Metabolism	Amino acid metabolism	gene20429|gene16324|gene7603|gene20276	IL4I1;BCAT1;MPST;S1PR2
4	map04978	Mineral absorption	KEGG PATHWAY	4/408	45/11318	0.0779283	0.372757	Organismal Systems	Digestive system	gene19688|gene16632|gene20082|gene7584	SLC46A1;ATP2B4;VDR;HMOX1
9	map04150	mTOR signaling pathway	KEGG PATHWAY	9/408	148/11318	0.0869677	0.389996	Environmental Information Processing	Signal transduction	gene4759|gene11315|gene13212|gene4973|gene15614|gene9991|gene12509|gene16171|gene13515	FNIP1;RNF152;CXCL1212;PRKAA2;LOC106044678;DEPTOR;WNT2B;FZD8;WNT11
6	map01522	Endocrine resistance	KEGG PATHWAY	6/408	85/11318	0.0860007	0.391781	Human Diseases	Drug resistance: antineoplastic	gene10304|gene19020|gene4965|gene13840|gene17850|gene12197	FOS;CDKN1A;JUN;HBEGF;MMP9;SRC
9	map05226	Gastric cancer	KEGG PATHWAY	9/408	150/11318	0.0926592	0.409126	Human Diseases	Cancer: specific types	gene12815|gene7321|gene13212|gene18243|gene19020|gene12509|gene9948|gene16171|gene13515	RXRG;HGF;CXCL1212;FGF12;CDKN1A;WNT2B;MYC;FZD8;WNT11
18	map04080	Neuroactive ligand-receptor interaction	KEGG PATHWAY	18/408	357/11318	0.0950254	0.413216	Environmental Information Processing	Signaling molecules and interaction	gene16609|gene8042|gene17479|gene12162|gene6855|gene20455|gene4021|gene20276|gene1827|gene17302|gene20364|gene7410|gene4364|gene18312|gene13258|gene9275|gene20137|gene6432	ADORA2B;RXFP3;GCGR;ADM;HTR2A;LOC106029317;ADRA2A;S1PR2;LOC106047885;PTAFR;LOC106049872;HTR1A;NPY2R;P2RY14;CXCL1258;GABRE;LOC106049633;SSTR2
6	map04610	Complement and coagulation cascades	KEGG PATHWAY	6/408	88/11318	0.0976793	0.418417	Organismal Systems	Immune system	gene13258|gene913|gene13386|gene17170|gene20137|gene19513	CXCL1258;F5;THBD;F10;LOC106049633;LOC106048983
5	map04917	Prolactin signaling pathway	KEGG PATHWAY	5/408	72/11318	0.117621	0.427308	Organismal Systems	Endocrine system	gene17471|gene10304|gene13920|gene16188|gene12197	SOCS3;FOS;CISH;NFKB1;SRC
5	map05140	Leishmaniasis	KEGG PATHWAY	5/408	70/11318	0.107634	0.429042	Human Diseases	Infectious disease: parasitic	gene20213|gene12081|gene4965|gene16188|gene10304	IL1B;EEF1A2;JUN;NFKB1;FOS
7	map04064	NF-kappa B signaling pathway	KEGG PATHWAY	7/408	114/11318	0.117495	0.432322	Environmental Information Processing	Signal transduction	gene20213|gene12290|gene4565|gene12857|gene132|gene16188|gene16394	IL1B;LOC106041041;TNFAIP3;LOC106041672;CXCL12;NFKB1;EDA2R
9	map05225	Hepatocellular carcinoma	KEGG PATHWAY	9/408	154/11318	0.104682	0.435416	Human Diseases	Cancer: specific types	gene7321|gene13212|gene2666|gene19020|gene12509|gene9948|gene7584|gene16171|gene13515	HGF;CXCL1212;LOC106030436;CDKN1A;WNT2B;MYC;HMOX1;FZD8;WNT11
4	map05014	Amyotrophic lateral sclerosis (ALS)	KEGG PATHWAY	4/408	52/11318	0.117001	0.436094	Human Diseases	Neurodegenerative disease	gene19389|gene11543|gene1504|gene19388	NEFL;TNFRSF1B;CAT;NEFM
6	map04620	Toll-like receptor signaling pathway	KEGG PATHWAY	6/408	94/11318	0.123407	0.437256	Organismal Systems	Immune system	gene20213|gene12290|gene10304|gene4965|gene16188|gene1071	IL1B;LOC106041041;FOS;JUN;NFKB1;CD80
3	map04710	Circadian rhythm	KEGG PATHWAY	3/408	32/11318	0.107019	0.438779	Organismal Systems	Environmental adaptation	gene4973|gene8380|gene9224	PRKAA2;BHLHE40;PASD1
3	map04392	Hippo signaling pathway - multiple species	KEGG PATHWAY	3/408	32/11318	0.107019	0.438779	Environmental Information Processing	Signal transduction	gene12635|gene14962|gene15511	LOC106041489;MOB1B;FRMD1
2	map00120	Primary bile acid biosynthesis	KEGG PATHWAY	2/408	16/11318	0.111609	0.43879	Metabolism	Lipid metabolism	gene9710|gene120	LOC106038153;CH25H
3	map00052	Galactose metabolism	KEGG PATHWAY	3/408	33/11318	0.114738	0.439064	Metabolism	Carbohydrate metabolism	gene16452|gene3107|gene19453	UGP2;LOC106030918;GCK
3	map05216	Thyroid cancer	KEGG PATHWAY	3/408	33/11318	0.114738	0.439064	Human Diseases	Cancer: specific types	gene9948|gene19020|gene12815	MYC;CDKN1A;RXRG
1	map00290	Valine, leucine and isoleucine biosynthesis	KEGG PATHWAY	1/408	3/11318	0.104303	0.440222	Metabolism	Amino acid metabolism	gene16324	BCAT1
7	map04660	T cell receptor signaling pathway	KEGG PATHWAY	7/408	113/11318	0.113572	0.440474	Organismal Systems	Immune system	gene17756|gene15614|gene10304|gene4965|gene1227|gene9821|gene16188	PAK6;LOC106044678;FOS;JUN;NFATC2;NFATC1;NFKB1
4	map00600	Sphingolipid metabolism	KEGG PATHWAY	4/408	53/11318	0.123171	0.441878	Metabolism	Lipid metabolism	gene10119|gene6629|gene230|gene10638	UGT8;SPHK1;ASAH2;NEU4
12	map05130	Pathogenic Escherichia coli infection	KEGG PATHWAY	12/408	231/11318	0.130737	0.452067	Human Diseases	Infectious disease: bacterial	gene20213|gene13258|gene6775|gene15062|gene15614|gene10304|gene4965|gene12857|gene19851|gene16188|gene5505|gene10022	IL1B;CXCL1258;TUBB6;ABL1;LOC106044678;FOS;JUN;LOC106041672;CLDN10;NFKB1;BAIAP2L1;LOC106038521
4	map04742	Taste transduction	KEGG PATHWAY	4/408	54/11318	0.129478	0.453172	Organismal Systems	Sensory system	gene17596|gene18496|gene7410|gene2031	LOC106046904;SCNN1A;HTR1A;KCNK5
3	map00250	Alanine, aspartate and glutamate metabolism	KEGG PATHWAY	3/408	36/11318	0.139073	0.453567	Metabolism	Amino acid metabolism	gene8697|gene4826|gene20429	LOC106037044;GFPT2;IL4I1
3	map00410	beta-Alanine metabolism	KEGG PATHWAY	3/408	36/11318	0.139073	0.453567	Metabolism	Metabolism of other amino acids	gene14372|gene10595|gene576	GADL1;EHHADH;ACOX3
10	map04360	Axon guidance	KEGG PATHWAY	10/408	187/11318	0.138555	0.457072	Organismal Systems	Development and regeneration	gene5579|gene17756|gene15999|gene15062|gene15614|gene20451|gene1227|gene132|gene7316|gene12197	SEMA6D;PAK6;SEMA4D;ABL1;LOC106044678;RHOD;NFATC2;CXCL12;GNAI1;SRC
1	map00261	Monobactam biosynthesis	KEGG PATHWAY	1/408	4/11318	0.136601	0.461229	Metabolism	Biosynthesis of other secondary metabolites	gene226	PAPSS2
1	map00524	Neomycin, kanamycin and gentamicin biosynthesis	KEGG PATHWAY	1/408	4/11318	0.136601	0.461229	Metabolism	Biosynthesis of other secondary metabolites	gene19453	GCK
9	map05167	Kaposi sarcoma-associated herpesvirus infection	KEGG PATHWAY	9/408	167/11318	0.149478	0.461294	Human Diseases	Infectious disease: viral	gene10304|gene19020|gene4965|gene1227|gene9948|gene14442|gene16188|gene9821|gene12197	FOS;CDKN1A;JUN;NFATC2;MYC;RCAN1;NFKB1;NFATC1;SRC
4	map05230	Central carbon metabolism in cancer	KEGG PATHWAY	4/408	58/11318	0.155974	0.461489	Human Diseases	Cancer: overview	gene9948|gene17501|gene19453|gene15359	MYC;SLC16A3;GCK;FGFR1
4	map04213	Longevity regulating pathway - multiple species	KEGG PATHWAY	4/408	58/11318	0.155974	0.461489	Organismal Systems	Aging	gene4973|gene8833|gene1504|gene11109	PRKAA2;HSPA2;CAT;HSPA8
5	map04146	Peroxisome	KEGG PATHWAY	5/408	80/11318	0.16161	0.463822	Cellular Processes	Transport and catabolism	gene576|gene10595|gene10056|gene6985|gene1504	ACOX3;EHHADH;ACSL4;ACSL1;CAT
2	map00533	Glycosaminoglycan biosynthesis - keratan sulfate	KEGG PATHWAY	2/408	18/11318	0.135874	0.464235	Metabolism	Glycan biosynthesis and metabolism	gene1404|gene16443	CHST1;B3GNT2
12	map04014	Ras signaling pathway	KEGG PATHWAY	12/408	237/11318	0.14887	0.46441	Environmental Information Processing	Signal transduction	gene17756|gene7321|gene18995|gene15062|gene15614|gene18243|gene5780|gene15094|gene15359|gene4102|gene16250|gene16188	PAK6;HGF;CSF1;ABL1;LOC106044678;FGF12;BDNF;RALGDS;FGFR1;PLD1;NTRK2;NFKB1
3	map00980	Metabolism of xenobiotics by cytochrome P450	KEGG PATHWAY	3/408	37/11318	0.147543	0.465329	Metabolism	Xenobiotics biodegradation and metabolism	gene1971|gene2666|gene12470	LOC106029463;LOC106030436;HPGDS
7	map05162	Measles	KEGG PATHWAY	7/408	123/11318	0.155849	0.465922	Human Diseases	Infectious disease: viral	gene20213|gene4565|gene10304|gene4965|gene16188|gene8833|gene11109	IL1B;TNFAIP3;FOS;JUN;NFKB1;HSPA2;HSPA8
2	map00511	Other glycan degradation	KEGG PATHWAY	2/408	20/11318	0.161162	0.467206	Metabolism	Glycan biosynthesis and metabolism	gene591|gene10638	LOC106035038;NEU4
8	map04218	Cellular senescence	KEGG PATHWAY	8/408	149/11318	0.169993	0.469117	Cellular Processes	Cell growth and death	gene19020|gene1227|gene9948|gene9821|gene13228|gene16188|gene4606|gene3789	CDKN1A;NFATC2;MYC;NFATC1;CXCL1228;NFKB1;TRAF3IP2;ZFP36L1
6	map04750	Inflammatory mediator regulation of TRP channels	KEGG PATHWAY	6/408	99/11318	0.147125	0.469165	Organismal Systems	Sensory system	gene20213|gene6855|gene17596|gene18252|gene12857|gene12197	IL1B;HTR2A;LOC106046904;IL1RAP;LOC106041672;SRC
4	map05321	Inflammatory bowel disease (IBD)	KEGG PATHWAY	4/408	60/11318	0.169922	0.473472	Human Diseases	Immune disease	gene20213|gene9821|gene4965|gene16188	IL1B;NFATC1;JUN;NFKB1
9	map04141	Protein processing in endoplasmic reticulum	KEGG PATHWAY	9/408	172/11318	0.168908	0.475261	Genetic Information Processing	Folding, sorting and degradation	gene12381|gene7530|gene12027|gene17700|gene8833|gene13539|gene5194|gene2637|gene11109	HSPH1;HSP90B1;HSPA5;HSP90AA1;HSPA2;HSPA4L;HERPUD1;BAG2;HSPA8
5	map05220	Chronic myeloid leukemia	KEGG PATHWAY	5/408	79/11318	0.155782	0.475633	Human Diseases	Cancer: specific types	gene978|gene9948|gene19020|gene15062|gene16188	CBLB;MYC;CDKN1A;ABL1;NFKB1
5	map05120	Epithelial cell signaling in Helicobacter pylori infection	KEGG PATHWAY	5/408	79/11318	0.155782	0.475633	Human Diseases	Infectious disease: bacterial	gene13840|gene16692|gene16188|gene12197|gene4965	HBEGF;LOC106045913;NFKB1;SRC;JUN
1	map00400	Phenylalanine, tyrosine and tryptophan biosynthesis	KEGG PATHWAY	1/408	5/11318	0.167736	0.476637	Metabolism	Amino acid metabolism	gene20429	IL4I1
5	map04912	GnRH signaling pathway	KEGG PATHWAY	5/408	84/11318	0.185764	0.493651	Organismal Systems	Endocrine system	gene4102|gene4693|gene13840|gene4965|gene12197	PLD1;EGR1;HBEGF;JUN;SRC
4	map04370	VEGF signaling pathway	KEGG PATHWAY	4/408	62/11318	0.184288	0.494305	Environmental Information Processing	Signal transduction	gene6629|gene12197|gene12661|gene1227	SPHK1;SRC;HSPB1;NFATC2
15	map05165	Human papillomavirus infection	KEGG PATHWAY	15/408	321/11318	0.183933	0.498009	Human Diseases	Infectious disease: viral	gene16763|gene2150|gene3818|gene8680|gene13212|gene19020|gene17377|gene12509|gene16188|gene6346|gene15519|gene20084|gene10590|gene16171|gene13515	ITGB3;ITGB6;THBS1;TNC;CXCL1212;CDKN1A;COL6A6;WNT2B;NFKB1;FN1;THBS2;COL2A1;PPP2R3A;FZD8;WNT11
7	map04371	Apelin signaling pathway	KEGG PATHWAY	7/408	130/11318	0.189158	0.498058	Environmental Information Processing	Signal transduction	gene4693|gene4973|gene4522|gene6629|gene15871|gene7316|gene10996	EGR1;PRKAA2;CTGF;SPHK1;KLF2;GNAI1;MYLK3
3	map00640	Propanoate metabolism	KEGG PATHWAY	3/408	41/11318	0.18295	0.500064	Metabolism	Carbohydrate metabolism	gene10595|gene576|gene3267	EHHADH;ACOX3;ACACB
5	map04662	B cell receptor signaling pathway	KEGG PATHWAY	5/408	85/11318	0.191999	0.500944	Organismal Systems	Immune system	gene10304|gene9821|gene4965|gene16188|gene1227	FOS;NFATC1;JUN;NFKB1;NFATC2
7	map04919	Thyroid hormone signaling pathway	KEGG PATHWAY	7/408	131/11318	0.19414	0.501964	Organismal Systems	Endocrine system	gene12815|gene16763|gene3348|gene9948|gene14442|gene12197|gene15493	RXRG;ITGB3;LOC106031415;MYC;RCAN1;SRC;DIO2
5	map04658	Th1 and Th2 cell differentiation	KEGG PATHWAY	5/408	87/11318	0.204687	0.524509	Organismal Systems	Immune system	gene10304|gene9821|gene4965|gene16188|gene1227	FOS;NFATC1;JUN;NFKB1;NFATC2
3	map04623	Cytosolic DNA-sensing pathway	KEGG PATHWAY	3/408	44/11318	0.210828	0.535466	Organismal Systems	Immune system	gene20213|gene12290|gene16188	IL1B;LOC106041041;NFKB1
5	map05100	Bacterial invasion of epithelial cells	KEGG PATHWAY	5/408	89/11318	0.217644	0.547927	Human Diseases	Infectious disease: bacterial	gene6346|gene12197|gene14127|gene978|gene15614	FN1;SRC;BCAR1;CBLB;LOC106044678
7	map00230	Purine metabolism	KEGG PATHWAY	7/408	137/11318	0.225073	0.561705	Metabolism	Nucleotide metabolism	gene7391|gene226|gene6535|gene14460|gene14604|gene18607|gene1856	PDE4D;PAPSS2;LOC106034733;LOC106043431;PDE4B;NT5C3B;NTPCR
7	map04621	NOD-like receptor signaling pathway	KEGG PATHWAY	7/408	138/11318	0.23039	0.570017	Organismal Systems	Immune system	gene20213|gene15614|gene4565|gene20599|gene4965|gene16188|gene17700	IL1B;LOC106044678;TNFAIP3;LOC106029457;JUN;NFKB1;HSP90AA1
10	map05132	Salmonella infection	KEGG PATHWAY	10/408	212/11318	0.235564	0.572941	Human Diseases	Infectious disease: bacterial	gene20213|gene15614|gene10304|gene19456|gene4965|gene7530|gene9948|gene16188|gene17700|gene10022	IL1B;LOC106044678;FOS;FLNC;JUN;HSP90B1;MYC;NFKB1;HSP90AA1;LOC106038521
6	map04931	Insulin resistance	KEGG PATHWAY	6/408	117/11318	0.24665	0.575517	Human Diseases	Endocrine and metabolic disease	gene3267|gene17471|gene4826|gene4973|gene7318|gene16188	ACACB;SOCS3;GFPT2;PRKAA2;CD36;NFKB1
6	map05231	Choline metabolism in cancer	KEGG PATHWAY	6/408	115/11318	0.234698	0.575713	Human Diseases	Cancer: overview	gene10304|gene4965|gene15094|gene4102|gene10861|gene10022	FOS;JUN;RALGDS;PLD1;SLC44A3;LOC106038521
8	map05152	Tuberculosis	KEGG PATHWAY	8/408	166/11318	0.250148	0.578971	Human Diseases	Infectious disease: bacterial	gene20213|gene15614|gene6629|gene16188|gene5106|gene20082|gene12197|gene8347	IL1B;LOC106044678;SPHK1;NFKB1;PLK3;VDR;SRC;IRAK2
7	map04630	Jak-STAT signaling pathway	KEGG PATHWAY	7/408	141/11318	0.246589	0.58009	Environmental Information Processing	Signal transduction	gene9522|gene17471|gene13920|gene19020|gene9948|gene16946|gene20501	CSF3R;SOCS3;CISH;CDKN1A;MYC;LOC106046136;LOC106029353
8	map04022	cGMP-PKG signaling pathway	KEGG PATHWAY	8/408	167/11318	0.255213	0.581319	Environmental Information Processing	Signal transduction	gene4021|gene16632|gene15614|gene3348|gene1227|gene9821|gene7316|gene10996	ADRA2A;ATP2B4;LOC106044678;LOC106031415;NFATC2;NFATC1;GNAI1;MYLK3
7	map04068	FoxO signaling pathway	KEGG PATHWAY	7/408	140/11318	0.241149	0.581595	Environmental Information Processing	Signal transduction	gene4973|gene19020|gene13228|gene1504|gene15871|gene13237|gene5106	PRKAA2;CDKN1A;CXCL1228;CAT;KLF2;CXCL1237;PLK3
1	map04122	Sulfur relay system	KEGG PATHWAY	1/408	8/11318	0.254581	0.584519	Genetic Information Processing	Folding, sorting and degradation	gene7603	MPST
4	map04971	Gastric acid secretion	KEGG PATHWAY	4/408	70/11318	0.245169	0.586362	Organismal Systems	Digestive system	gene7316|gene6432|gene826|gene10996	GNAI1;SSTR2;KCNK10;MYLK3
4	map05218	Melanoma	KEGG PATHWAY	4/408	70/11318	0.245169	0.586362	Human Diseases	Cancer: specific types	gene18243|gene19020|gene7321|gene15359	FGF12;CDKN1A;HGF;FGFR1
6	map04670	Leukocyte transendothelial migration	KEGG PATHWAY	6/408	120/11318	0.264895	0.598621	Organismal Systems	Immune system	gene132|gene15614|gene14127|gene19851|gene17850|gene7316	CXCL12;LOC106044678;BCAR1;CLDN10;MMP9;GNAI1
3	map05204	Chemical carcinogenesis	KEGG PATHWAY	3/408	50/11318	0.268877	0.602872	Human Diseases	Cancer: overview	gene1971|gene2666|gene12470	LOC106029463;LOC106030436;HPGDS
5	map05222	Small cell lung cancer	KEGG PATHWAY	5/408	97/11318	0.271708	0.604497	Human Diseases	Cancer: specific types	gene6346|gene12815|gene19020|gene16188|gene9948	FN1;RXRG;CDKN1A;NFKB1;MYC
4	map05212	Pancreatic cancer	KEGG PATHWAY	4/408	74/11318	0.277129	0.607145	Human Diseases	Cancer: specific types	gene4102|gene19020|gene15094|gene16188	PLD1;CDKN1A;RALGDS;NFKB1
9	map05170	Human immunodeficiency virus 1 infection	KEGG PATHWAY	9/408	196/11318	0.276064	0.609465	Human Diseases	Infectious disease: viral	gene17756|gene11543|gene10304|gene4965|gene1227|gene9821|gene13228|gene16188|gene7316	PAK6;TNFRSF1B;FOS;JUN;NFATC2;NFATC1;CXCL1228;NFKB1;GNAI1
2	map05332	Graft-versus-host disease	KEGG PATHWAY	2/408	29/11318	0.281217	0.611433	Human Diseases	Immune disease	gene20213|gene1071	IL1B;CD80
2	map00790	Folate biosynthesis	KEGG PATHWAY	2/408	29/11318	0.281217	0.611433	Metabolism	Metabolism of cofactors and vitamins	gene3107|gene15033	LOC106030918;GCH1
2	map04977	Vitamin digestion and absorption	KEGG PATHWAY	2/408	29/11318	0.281217	0.611433	Organismal Systems	Digestive system	gene19688|gene11034	SLC46A1;LOC106039631
3	map04612	Antigen processing and presentation	KEGG PATHWAY	3/408	52/11318	0.288649	0.613646	Organismal Systems	Immune system	gene8833|gene11109|gene17700	HSPA2;HSPA8;HSP90AA1
4	map05211	Renal cell carcinoma	KEGG PATHWAY	4/408	76/11318	0.29336	0.619075	Human Diseases	Cancer: specific types	gene17756|gene19020|gene4965|gene7321	PAK6;CDKN1A;JUN;HGF
9	map04020	Calcium signaling pathway	KEGG PATHWAY	9/408	200/11318	0.295653	0.61936	Environmental Information Processing	Signal transduction	gene16609|gene13258|gene16632|gene6855|gene3348|gene17302|gene20364|gene6629|gene10996	ADORA2B;CXCL1258;ATP2B4;HTR2A;LOC106031415;PTAFR;LOC106049872;SPHK1;MYLK3
5	map04916	Melanogenesis	KEGG PATHWAY	5/408	101/11318	0.299756	0.623405	Organismal Systems	Endocrine system	gene13515|gene12509|gene7316|gene16171|gene13212	WNT11;WNT2B;GNAI1;FZD8;CXCL1212
9	map05166	Human T-cell leukemia virus 1 infection	KEGG PATHWAY	9/408	203/11318	0.310569	0.636666	Human Diseases	Infectious disease: viral	gene4693|gene10304|gene19020|gene4965|gene1227|gene9948|gene9821|gene16188|gene12857	EGR1;FOS;CDKN1A;JUN;NFATC2;MYC;NFATC1;NFKB1;LOC106041672
7	map04934	Cushing syndrome	KEGG PATHWAY	7/408	152/11318	0.308597	0.637176	Human Diseases	Endocrine and metabolic disease	gene13212|gene19020|gene12509|gene18365|gene7316|gene16171|gene13515	CXCL1212;CDKN1A;WNT2B;ATG101;GNAI1;FZD8;WNT11
5	map05410	Hypertrophic cardiomyopathy (HCM)	KEGG PATHWAY	5/408	103/11318	0.313953	0.63904	Human Diseases	Cardiovascular disease	gene4973|gene19493|gene2150|gene16763|gene3348	PRKAA2;LMNA;ITGB6;ITGB3;LOC106031415
2	map01040	Biosynthesis of unsaturated fatty acids	KEGG PATHWAY	2/408	32/11318	0.321588	0.649971	Metabolism	Lipid metabolism	gene576|gene5871	ACOX3;ELOVL1
4	map04914	Progesterone-mediated oocyte maturation	KEGG PATHWAY	4/408	80/11318	0.326146	0.654573	Organismal Systems	Endocrine system	gene18084|gene13228|gene7316|gene17700	CPEB1;CXCL1228;GNAI1;HSP90AA1
4	map04727	GABAergic synapse	KEGG PATHWAY	4/408	81/11318	0.334386	0.661854	Organismal Systems	Nervous system	gene8697|gene9275|gene7316|gene12197	LOC106037044;GABRE;GNAI1;SRC
6	map04611	Platelet activation	KEGG PATHWAY	6/408	131/11318	0.334214	0.666107	Organismal Systems	Immune system	gene13258|gene16763|gene15614|gene7316|gene10996|gene12197	CXCL1258;ITGB3;LOC106044678;GNAI1;MYLK3;SRC
3	map00280	Valine, leucine and isoleucine degradation	KEGG PATHWAY	3/408	58/11318	0.348355	0.670993	Metabolism	Amino acid metabolism	gene20429|gene16324|gene10595	IL4I1;BCAT1;EHHADH
10	map05131	Shigellosis	KEGG PATHWAY	10/408	237/11318	0.350876	0.671342	Human Diseases	Infectious disease: bacterial	gene20213|gene1497|gene1496|gene15062|gene15614|gene4965|gene19453|gene12857|gene16188|gene12197	IL1B;LOC106044451;CD44;ABL1;LOC106044678;JUN;GCK;LOC106041672;NFKB1;SRC
7	map04072	Phospholipase D signaling pathway	KEGG PATHWAY	7/408	158/11318	0.34364	0.675512	Environmental Information Processing	Signal transduction	gene13258|gene4102|gene15614|gene1827|gene15094|gene16692|gene6629	CXCL1258;PLD1;LOC106044678;LOC106047885;RALGDS;LOC106045913;SPHK1
2	map05143	African trypanosomiasis	KEGG PATHWAY	2/408	34/11318	0.348201	0.67982	Human Diseases	Infectious disease: parasitic	gene12814|gene20213	LOC106041602;IL1B
2	map00051	Fructose and mannose metabolism	KEGG PATHWAY	2/408	34/11318	0.348201	0.67982	Metabolism	Carbohydrate metabolism	gene3107|gene19453	LOC106030918;GCK
3	map05031	Amphetamine addiction	KEGG PATHWAY	3/408	59/11318	0.358291	0.68099	Human Diseases	Substance dependence	gene20646|gene10304|gene4965	LOC106029507;FOS;JUN
4	map04520	Adherens junction	KEGG PATHWAY	4/408	86/11318	0.375649	0.704649	Cellular Processes	Cellular community - eukaryotes	gene10022|gene15359|gene12197|gene15614	LOC106038521;FGFR1;SRC;LOC106044678
2	map04624	Toll and Imd signaling pathway	KEGG PATHWAY	2/408	36/11318	0.374455	0.70703	Organismal Systems	Immune system	gene4965|gene16188	JUN;NFKB1
3	map04137	Mitophagy - animal	KEGG PATHWAY	3/408	62/11318	0.387947	0.718327	Cellular Processes	Transport and catabolism	gene4580|gene4965|gene12197	CITED2;JUN;SRC
2	map00982	Drug metabolism - cytochrome P450	KEGG PATHWAY	2/408	37/11318	0.387421	0.722012	Metabolism	Xenobiotics biodegradation and metabolism	gene2666|gene12470	LOC106030436;HPGDS
5	map05146	Amoebiasis	KEGG PATHWAY	5/408	114/11318	0.393004	0.723027	Human Diseases	Infectious disease: parasitic	gene6346|gene20213|gene16188|gene12661|gene12857	FN1;IL1B;NFKB1;HSPB1;LOC106041672
1	map00730	Thiamine metabolism	KEGG PATHWAY	1/408	14/11318	0.402084	0.730368	Metabolism	Metabolism of cofactors and vitamins	gene1856	NTPCR
2	map00630	Glyoxylate and dicarboxylate metabolism	KEGG PATHWAY	2/408	38/11318	0.400268	0.7317	Metabolism	Carbohydrate metabolism	gene8697|gene1504	LOC106037044;CAT
4	map05032	Morphine addiction	KEGG PATHWAY	4/408	90/11318	0.408516	0.732776	Human Diseases	Substance dependence	gene7391|gene9275|gene14604|gene7316	PDE4D;GABRE;PDE4B;GNAI1
4	map05412	Arrhythmogenic right ventricular cardiomyopathy (ARVC)	KEGG PATHWAY	4/408	90/11318	0.408516	0.732776	Human Diseases	Cardiovascular disease	gene19493|gene2150|gene16763|gene3348	LMNA;ITGB6;ITGB3;LOC106031415
5	map05142	Chagas disease (American trypanosomiasis)	KEGG PATHWAY	5/408	116/11318	0.407387	0.735346	Human Diseases	Infectious disease: parasitic	gene20213|gene10304|gene7316|gene4965|gene16188	IL1B;FOS;GNAI1;JUN;NFKB1
4	map04540	Gap junction	KEGG PATHWAY	4/408	91/11318	0.416685	0.738201	Cellular Processes	Cellular community - eukaryotes	gene6775|gene7316|gene12197|gene6855	TUBB6;GNAI1;SRC;HTR2A
3	map01524	Platinum drug resistance	KEGG PATHWAY	3/408	66/11318	0.426936	0.747138	Human Diseases	Drug resistance: antineoplastic	gene4609|gene2666|gene19020	REV3L;LOC106030436;CDKN1A
2	map04940	Type I diabetes mellitus	KEGG PATHWAY	2/408	40/11318	0.425571	0.749319	Human Diseases	Endocrine and metabolic disease	gene20213|gene1071	IL1B;CD80
2	map00140	Steroid hormone biosynthesis	KEGG PATHWAY	2/408	41/11318	0.438013	0.761878	Metabolism	Lipid metabolism	gene1971|gene1942	LOC106029463;SRD5A2
2	map00500	Starch and sucrose metabolism	KEGG PATHWAY	2/408	41/11318	0.438013	0.761878	Metabolism	Carbohydrate metabolism	gene16452|gene19453	UGP2;GCK
3	map04115	p53 signaling pathway	KEGG PATHWAY	3/408	68/11318	0.446108	0.766665	Cellular Processes	Cell growth and death	gene13228|gene19020|gene3818	CXCL1228;CDKN1A;THBS1
2	map04930	Type II diabetes mellitus	KEGG PATHWAY	2/408	42/11318	0.450307	0.769275	Human Diseases	Endocrine and metabolic disease	gene17471|gene19453	SOCS3;GCK
3	map05221	Acute myeloid leukemia	KEGG PATHWAY	3/408	69/11318	0.455599	0.77371	Human Diseases	Cancer: specific types	gene9948|gene16946|gene16188	MYC;LOC106046136;NFKB1
1	map00910	Nitrogen metabolism	KEGG PATHWAY	1/408	17/11318	0.464523	0.775106	Metabolism	Energy metabolism	gene8697	LOC106037044
5	map05034	Alcoholism	KEGG PATHWAY	5/408	124/11318	0.464304	0.77927	Human Diseases	Substance dependence	gene16609|gene20646|gene7316|gene16250|gene5780	ADORA2B;LOC106029507;GNAI1;NTRK2;BDNF
2	map04340	Hedgehog signaling pathway	KEGG PATHWAY	2/408	43/11318	0.462448	0.780721	Environmental Information Processing	Signal transduction	gene601|gene4298	EVC2;HHIP
4	map00564	Glycerophospholipid metabolism	KEGG PATHWAY	4/408	100/11318	0.488722	0.79695	Metabolism	Lipid metabolism	gene18351|gene12594|gene4102|gene18296	GPD1;ETNK2;PLD1;CDS2
1	map00220	Arginine biosynthesis	KEGG PATHWAY	1/408	19/11318	0.502492	0.801195	Metabolism	Amino acid metabolism	gene8697	LOC106037044
1	map00450	Selenocompound metabolism	KEGG PATHWAY	1/408	18/11318	0.483855	0.802697	Metabolism	Metabolism of other amino acids	gene226	PAPSS2
1	map00670	One carbon pool by folate	KEGG PATHWAY	1/408	18/11318	0.483855	0.802697	Metabolism	Metabolism of cofactors and vitamins	gene14460	LOC106043431
1	map00360	Phenylalanine metabolism	KEGG PATHWAY	1/408	18/11318	0.483855	0.802697	Metabolism	Amino acid metabolism	gene20429	IL4I1
1	map00053	Ascorbate and aldarate metabolism	KEGG PATHWAY	1/408	20/11318	0.520456	0.80307	Metabolism	Carbohydrate metabolism	gene10570	UGDH
9	map04144	Endocytosis	KEGG PATHWAY	9/408	244/11318	0.520271	0.807123	Cellular Processes	Transport and catabolism	gene4102|gene17947|gene15614|gene11109|gene978|gene16692|gene12197|gene8833|gene14601	PLD1;SH3GLB2;LOC106044678;HSPA8;CBLB;LOC106045913;SRC;HSPA2;DNAJC6
4	map04726	Serotonergic synapse	KEGG PATHWAY	4/408	103/11318	0.511945	0.807298	Organismal Systems	Nervous system	gene6855|gene7316|gene7410|gene13852	HTR2A;GNAI1;HTR1A;DUSP1
2	map00565	Ether lipid metabolism	KEGG PATHWAY	2/408	46/11318	0.497901	0.807331	Metabolism	Lipid metabolism	gene4102|gene10119	PLD1;UGT8
2	map04973	Carbohydrate digestion and absorption	KEGG PATHWAY	2/408	46/11318	0.497901	0.807331	Organismal Systems	Digestive system	gene15274|gene19453	SLC2A5;GCK
2	map04962	Vasopressin-regulated water reabsorption	KEGG PATHWAY	2/408	46/11318	0.497901	0.807331	Organismal Systems	Excretory system	gene11623|gene1827	LOC106040258;LOC106047885
2	map04961	Endocrine and other factor-regulated calcium reabsorption	KEGG PATHWAY	2/408	47/11318	0.509383	0.807696	Organismal Systems	Excretory system	gene16632|gene20082	ATP2B4;VDR
4	map04066	HIF-1 signaling pathway	KEGG PATHWAY	4/408	104/11318	0.519579	0.810431	Environmental Information Processing	Signal transduction	gene19020|gene19453|gene16188|gene7584	CDKN1A;GCK;NFKB1;HMOX1
3	map04391	Hippo signaling pathway - fly	KEGG PATHWAY	3/408	77/11318	0.528785	0.811558	Environmental Information Processing	Signal transduction	gene9948|gene14962|gene12635	MYC;MOB1B;LOC106041489
2	map04975	Fat digestion and absorption	KEGG PATHWAY	2/408	49/11318	0.531826	0.811883	Organismal Systems	Digestive system	gene13512|gene7318	DGAT2;CD36
5	map04261	Adrenergic signaling in cardiomyocytes	KEGG PATHWAY	5/408	132/11318	0.519495	0.814728	Organismal Systems	Circulatory system	gene16176|gene16632|gene7316|gene3348|gene10590	CREM;ATP2B4;GNAI1;LOC106031415;PPP2R3A
4	map05145	Toxoplasmosis	KEGG PATHWAY	4/408	107/11318	0.542137	0.823245	Human Diseases	Infectious disease: parasitic	gene8833|gene7316|gene16188|gene11109	HSPA2;GNAI1;NFKB1;HSPA8
5	map04910	Insulin signaling pathway	KEGG PATHWAY	5/408	139/11318	0.565726	0.84126	Organismal Systems	Endocrine system	gene17471|gene4973|gene19453|gene978|gene3267	SOCS3;PRKAA2;GCK;CBLB;ACACB
5	map04932	Non-alcoholic fatty liver disease (NAFLD)	KEGG PATHWAY	5/408	139/11318	0.565726	0.84126	Human Diseases	Endocrine and metabolic disease	gene17471|gene4973|gene20213|gene4965|gene16188	SOCS3;PRKAA2;IL1B;JUN;NFKB1
3	map04925	Aldosterone synthesis and secretion	KEGG PATHWAY	3/408	82/11318	0.571648	0.841348	Organismal Systems	Endocrine system	gene16632|gene18365|gene14895	ATP2B4;ATG101;NR4A2
5	map05160	Hepatitis C	KEGG PATHWAY	5/408	138/11318	0.559258	0.844774	Human Diseases	Infectious disease: viral	gene17471|gene19851|gene19020|gene16188|gene9948	SOCS3;CLDN10;CDKN1A;NFKB1;MYC
1	map04614	Renin-angiotensin system	KEGG PATHWAY	1/408	24/11318	0.586072	0.845239	Organismal Systems	Endocrine system	gene20455	LOC106029317
4	map04724	Glutamatergic synapse	KEGG PATHWAY	4/408	110/11318	0.564143	0.847691	Organismal Systems	Nervous system	gene4102|gene13237|gene7316|gene8697	PLD1;CXCL1237;GNAI1;LOC106037044
4	map05414	Dilated cardiomyopathy (DCM)	KEGG PATHWAY	4/408	110/11318	0.564143	0.847691	Human Diseases	Cardiovascular disease	gene19493|gene2150|gene16763|gene3348	LMNA;ITGB6;ITGB3;LOC106031415
7	map05169	Epstein-Barr virus infection	KEGG PATHWAY	7/408	200/11318	0.585802	0.849116	Human Diseases	Infectious disease: viral	gene1497|gene1496|gene4565|gene19020|gene4965|gene9948|gene16188	LOC106044451;CD44;TNFAIP3;CDKN1A;JUN;MYC;NFKB1
2	map04923	Regulation of lipolysis in adipocytes	KEGG PATHWAY	2/408	54/11318	0.584803	0.856319	Organismal Systems	Endocrine system	gene7316|gene2802	GNAI1;LOC106030656
2	map04672	Intestinal immune network for IgA production	KEGG PATHWAY	2/408	54/11318	0.584803	0.856319	Organismal Systems	Immune system	gene132|gene1071	CXCL12;CD80
2	map00590	Arachidonic acid metabolism	KEGG PATHWAY	2/408	56/11318	0.60472	0.859181	Metabolism	Lipid metabolism	gene3517|gene12470	GGT1;HPGDS
5	map04210	Apoptosis	KEGG PATHWAY	5/408	146/11318	0.609592	0.861837	Cellular Processes	Cell growth and death	gene19493|gene20501|gene4965|gene16188|gene10304	LMNA;LOC106029353;JUN;NFKB1;FOS
1	map04320	Dorso-ventral axis formation	KEGG PATHWAY	1/408	25/11318	0.601025	0.862471	Organismal Systems	Development and regeneration	gene18084	CPEB1
1	map03060	Protein export	KEGG PATHWAY	1/408	25/11318	0.601025	0.862471	Genetic Information Processing	Folding, sorting and degradation	gene12027	HSPA5
1	map00062	Fatty acid elongation	KEGG PATHWAY	1/408	26/11318	0.61544	0.865839	Metabolism	Lipid metabolism	gene5871	ELOVL1
1	map03410	Base excision repair	KEGG PATHWAY	1/408	28/11318	0.642728	0.866024	Genetic Information Processing	Replication and repair	gene3268	UNG
1	map00592	alpha-Linolenic acid metabolism	KEGG PATHWAY	1/408	28/11318	0.642728	0.866024	Metabolism	Lipid metabolism	gene576	ACOX3
2	map00983	Drug metabolism - other enzymes	KEGG PATHWAY	2/408	59/11318	0.633226	0.869549	Metabolism	Xenobiotics biodegradation and metabolism	gene6535|gene2666	LOC106034733;LOC106030436
2	map05213	Endometrial cancer	KEGG PATHWAY	2/408	59/11318	0.633226	0.869549	Human Diseases	Cancer: specific types	gene9948|gene19020	MYC;CDKN1A
2	map04918	Thyroid hormone synthesis	KEGG PATHWAY	2/408	60/11318	0.642364	0.869616	Organismal Systems	Endocrine system	gene12027|gene7530	HSPA5;HSP90B1
6	map05203	Viral carcinogenesis	KEGG PATHWAY	6/408	181/11318	0.640377	0.871034	Human Diseases	Cancer: overview	gene13265|gene15614|gene19020|gene4965|gene16188|gene12197	CXCL1265;LOC106044678;CDKN1A;JUN;NFKB1;SRC
4	map04270	Vascular smooth muscle contraction	KEGG PATHWAY	4/408	120/11318	0.633071	0.873516	Organismal Systems	Circulatory system	gene16609|gene10996|gene12162|gene15614	ADORA2B;MYLK3;ADM;LOC106044678
3	map04922	Glucagon signaling pathway	KEGG PATHWAY	3/408	97/11318	0.684816	0.873521	Organismal Systems	Endocrine system	gene17479|gene4973|gene3267	GCGR;PRKAA2;ACACB
1	map00860	Porphyrin and chlorophyll metabolism	KEGG PATHWAY	1/408	29/11318	0.65564	0.875203	Metabolism	Metabolism of cofactors and vitamins	gene7584	HMOX1
1	map04130	SNARE interactions in vesicular transport	KEGG PATHWAY	1/408	31/11318	0.680082	0.875263	Genetic Information Processing	Folding, sorting and degradation	gene11623	LOC106040258
1	map00512	Mucin type O-glycan biosynthesis	KEGG PATHWAY	1/408	31/11318	0.680082	0.875263	Metabolism	Glycan biosynthesis and metabolism	gene1204	B4GALT5
3	map04974	Protein digestion and absorption	KEGG PATHWAY	3/408	95/11318	0.671115	0.8755	Organismal Systems	Digestive system	gene20084|gene17377|gene2031	COL2A1;COL6A6;KCNK5
1	map00650	Butanoate metabolism	KEGG PATHWAY	1/408	27/11318	0.629335	0.876791	Metabolism	Carbohydrate metabolism	gene10595	EHHADH
1	map00601	Glycosphingolipid biosynthesis - lacto and neolacto series	KEGG PATHWAY	1/408	27/11318	0.629335	0.876791	Metabolism	Glycan biosynthesis and metabolism	gene16443	B3GNT2
5	map04145	Phagosome	KEGG PATHWAY	5/408	158/11318	0.67849	0.877147	Cellular Processes	Transport and catabolism	gene15519|gene6775|gene7318|gene3818|gene16763	THBS2;TUBB6;CD36;THBS1;ITGB3
6	map04530	Tight junction	KEGG PATHWAY	6/408	191/11318	0.691081	0.877612	Cellular Processes	Cellular community - eukaryotes	gene15614|gene4973|gene4965|gene19851|gene12635|gene12197	LOC106044678;PRKAA2;JUN;CLDN10;LOC106041489;SRC
4	map04110	Cell cycle	KEGG PATHWAY	4/408	130/11318	0.694587	0.878178	Cellular Processes	Cell growth and death	gene9948|gene13228|gene19020|gene15062	MYC;CXCL1228;CDKN1A;ABL1
3	map04211	Longevity regulating pathway	KEGG PATHWAY	3/408	89/11318	0.627432	0.878404	Organismal Systems	Aging	gene4973|gene1504|gene16188	PRKAA2;CAT;NFKB1
4	map04152	AMPK signaling pathway	KEGG PATHWAY	4/408	127/11318	0.676938	0.879101	Environmental Information Processing	Signal transduction	gene4973|gene7318|gene3267|gene10590	PRKAA2;CD36;ACACB;PPP2R3A
4	map04140	Autophagy - animal	KEGG PATHWAY	4/408	126/11318	0.670901	0.879217	Cellular Processes	Transport and catabolism	gene4973|gene17535|gene9991|gene5711	PRKAA2;VMP1;DEPTOR;DAPK2
4	map04217	Necroptosis	KEGG PATHWAY	4/408	131/11318	0.700315	0.881537	Cellular Processes	Cell growth and death	gene20213|gene4565|gene17700|gene8697	IL1B;TNFAIP3;HSP90AA1;LOC106037044
2	map05223	Non-small cell lung cancer	KEGG PATHWAY	2/408	63/11318	0.668703	0.888508	Human Diseases	Cancer: specific types	gene12815|gene19020	RXRG;CDKN1A
2	map00240	Pyrimidine metabolism	KEGG PATHWAY	2/408	63/11318	0.668703	0.888508	Metabolism	Nucleotide metabolism	gene6535|gene18607	LOC106034733;NT5C3B
2	map04622	RIG-I-like receptor signaling pathway	KEGG PATHWAY	2/408	63/11318	0.668703	0.888508	Organismal Systems	Immune system	gene13265|gene16188	CXCL1265;NFKB1
1	map04960	Aldosterone-regulated sodium reabsorption	KEGG PATHWAY	1/408	34/11318	0.713539	0.894261	Organismal Systems	Excretory system	gene18496	SCNN1A
3	map04972	Pancreatic secretion	KEGG PATHWAY	3/408	102/11318	0.717194	0.894933	Organismal Systems	Digestive system	gene16632|gene3348|gene15614	ATP2B4;LOC106031415;LOC106044678
1	map00350	Tyrosine metabolism	KEGG PATHWAY	1/408	36/11318	0.733881	0.903965	Metabolism	Amino acid metabolism	gene20429	IL4I1
2	map00310	Lysine degradation	KEGG PATHWAY	2/408	71/11318	0.731299	0.908584	Metabolism	Amino acid metabolism	gene16522|gene10595	DOT1L;EHHADH
2	map04212	Longevity regulating pathway - worm	KEGG PATHWAY	2/408	71/11318	0.731299	0.908584	Organismal Systems	Aging	gene2666|gene1504	LOC106030436;CAT
1	map00760	Nicotinate and nicotinamide metabolism	KEGG PATHWAY	1/408	37/11318	0.743505	0.911905	Metabolism	Metabolism of cofactors and vitamins	gene18607	NT5C3B
3	map04728	Dopaminergic synapse	KEGG PATHWAY	3/408	113/11318	0.77928	0.916612	Organismal Systems	Nervous system	gene10304|gene7316|gene10590	FOS;GNAI1;PPP2R3A
2	map05416	Viral myocarditis	KEGG PATHWAY	2/408	77/11318	0.771409	0.918649	Human Diseases	Cardiovascular disease	gene1071|gene15062	CD80;ABL1
2	map04013	MAPK signaling pathway - fly	KEGG PATHWAY	2/408	77/11318	0.771409	0.918649	Environmental Information Processing	Signal transduction	gene4965|gene12197	JUN;SRC
2	map04970	Salivary secretion	KEGG PATHWAY	2/408	77/11318	0.771409	0.918649	Organismal Systems	Digestive system	gene11623|gene16632	LOC106040258;ATP2B4
9	map05010	Alzheimer disease	KEGG PATHWAY	9/408	308/11318	0.78562	0.920298	Human Diseases	Neurodegenerative disease	gene20213|gene6775|gene18995|gene13212|gene3348|gene12509|gene16188|gene16171|gene13515	IL1B;TUBB6;CSF1;CXCL1212;LOC106031415;WNT2B;NFKB1;FZD8;WNT11
1	map05330	Allograft rejection	KEGG PATHWAY	1/408	40/11318	0.770343	0.921201	Human Diseases	Immune disease	gene1071	CD80
2	map05150	Staphylococcus aureus infection	KEGG PATHWAY	2/408	76/11318	0.765107	0.922629	Human Diseases	Infectious disease: bacterial	gene17302|gene20137	PTAFR;LOC106049633
3	map04666	Fc gamma R-mediated phagocytosis	KEGG PATHWAY	3/408	111/11318	0.768896	0.923319	Organismal Systems	Immune system	gene4102|gene10022|gene6629	PLD1;LOC106038521;SPHK1
2	map01521	EGFR tyrosine kinase inhibitor resistance	KEGG PATHWAY	2/408	81/11318	0.795164	0.923935	Human Diseases	Drug resistance: antineoplastic	gene12197|gene7321	SRC;HGF
1	map00620	Pyruvate metabolism	KEGG PATHWAY	1/408	39/11318	0.761723	0.926333	Metabolism	Carbohydrate metabolism	gene3267	ACACB
1	map05340	Primary immunodeficiency	KEGG PATHWAY	1/408	39/11318	0.761723	0.926333	Human Diseases	Immune disease	gene3268	UNG
1	map00513	Various types of N-glycan biosynthesis	KEGG PATHWAY	1/408	43/11318	0.794379	0.926775	Metabolism	Glycan biosynthesis and metabolism	gene11820	ALG12
1	map00830	Retinol metabolism	KEGG PATHWAY	1/408	44/11318	0.801819	0.927912	Metabolism	Metabolism of cofactors and vitamins	gene16712	LOC106045912
5	map05168	Herpes simplex virus 1 infection	KEGG PATHWAY	5/408	175/11318	0.761354	0.929824	Human Diseases	Infectious disease: viral	gene17471|gene20213|gene12197|gene16763|gene16188	SOCS3;IL1B;SRC;ITGB3;NFKB1
1	map00510	N-Glycan biosynthesis	KEGG PATHWAY	1/408	48/11318	0.828991	0.940397	Metabolism	Glycan biosynthesis and metabolism	gene11820	ALG12
1	map00330	Arginine and proline metabolism	KEGG PATHWAY	1/408	48/11318	0.828991	0.940397	Metabolism	Amino acid metabolism	gene2941	ODC1
1	map05033	Nicotine addiction	KEGG PATHWAY	1/408	46/11318	0.815904	0.94042	Human Diseases	Substance dependence	gene9275	GABRE
1	map00970	Aminoacyl-tRNA biosynthesis	KEGG PATHWAY	1/408	46/11318	0.815904	0.94042	Genetic Information Processing	Translation	gene13696	CARS
1	map04979	Cholesterol metabolism	KEGG PATHWAY	1/408	46/11318	0.815904	0.94042	Organismal Systems	Digestive system	gene7318	CD36
1	map05320	Autoimmune thyroid disease	KEGG PATHWAY	1/408	46/11318	0.815904	0.94042	Human Diseases	Immune disease	gene1071	CD80
2	map00561	Glycerolipid metabolism	KEGG PATHWAY	2/408	93/11318	0.853822	0.946127	Metabolism	Lipid metabolism	gene13512|gene3107	DGAT2;LOC106030918
2	map04650	Natural killer cell mediated cytotoxicity	KEGG PATHWAY	2/408	90/11318	0.840787	0.946298	Organismal Systems	Immune system	gene9821|gene1227	NFATC1;NFATC2
1	map04330	Notch signaling pathway	KEGG PATHWAY	1/408	52/11318	0.852445	0.948262	Environmental Information Processing	Signal transduction	gene1334	NUMB
1	map02010	ABC transporters	KEGG PATHWAY	1/408	51/11318	0.846901	0.949455	Environmental Information Processing	Membrane transport	gene5431	LOC106033455
1	map04214	Apoptosis - fly	KEGG PATHWAY	1/408	51/11318	0.846901	0.949455	Cellular Processes	Cell growth and death	gene4965	JUN
2	map04070	Phosphatidylinositol signaling system	KEGG PATHWAY	2/408	96/11318	0.865878	0.952134	Environmental Information Processing	Signal transduction	gene18296|gene6151	CDS2;SYNJ2
1	map04913	Ovarian steroidogenesis	KEGG PATHWAY	1/408	54/11318	0.862939	0.952552	Organismal Systems	Endocrine system	gene1971	LOC106029463
1	map00010	Glycolysis / Gluconeogenesis	KEGG PATHWAY	1/408	61/11318	0.894142	0.953973	Metabolism	Carbohydrate metabolism	gene19453	GCK
3	map04723	Retrograde endocannabinoid signaling	KEGG PATHWAY	3/408	136/11318	0.873154	0.95647	Organismal Systems	Nervous system	gene9275|gene7316|gene5068	GABRE;GNAI1;LOC106033086
2	map04114	Oocyte meiosis	KEGG PATHWAY	2/408	104/11318	0.893704	0.957064	Cellular Processes	Cell growth and death	gene18084|gene13228	CPEB1;CXCL1228
1	map04721	Synaptic vesicle cycle	KEGG PATHWAY	1/408	77/11318	0.941383	0.958074	Organismal Systems	Nervous system	gene11623	LOC106040258
2	map03040	Spliceosome	KEGG PATHWAY	2/408	109/11318	0.908269	0.958357	Genetic Information Processing	Transcription	gene8833|gene11109	HSPA2;HSPA8
1	map04730	Long-term depression	KEGG PATHWAY	1/408	63/11318	0.901677	0.958449	Organismal Systems	Nervous system	gene7316	GNAI1
1	map04924	Renin secretion	KEGG PATHWAY	1/408	64/11318	0.905241	0.958687	Organismal Systems	Endocrine system	gene7316	GNAI1
1	map00562	Inositol phosphate metabolism	KEGG PATHWAY	1/408	76/11318	0.939176	0.959229	Metabolism	Carbohydrate metabolism	gene6151	SYNJ2
1	map04911	Insulin secretion	KEGG PATHWAY	1/408	72/11318	0.929485	0.959576	Organismal Systems	Endocrine system	gene11623	LOC106040258
1	map04664	Fc epsilon RI signaling pathway	KEGG PATHWAY	1/408	71/11318	0.926831	0.96029	Organismal Systems	Immune system	gene12380	ALOX5AP
2	map04725	Cholinergic synapse	KEGG PATHWAY	2/408	103/11318	0.890544	0.96085	Organismal Systems	Nervous system	gene10304|gene7316	FOS;GNAI1
2	map04713	Circadian entrainment	KEGG PATHWAY	2/408	103/11318	0.890544	0.96085	Organismal Systems	Environmental adaptation	gene10304|gene7316	FOS;GNAI1
2	map05012	Parkinson disease	KEGG PATHWAY	2/408	122/11318	0.937872	0.961319	Human Diseases	Neurodegenerative disease	gene7316|gene18268	GNAI1;GPR37
1	map03018	RNA degradation	KEGG PATHWAY	1/408	67/11318	0.915179	0.962111	Genetic Information Processing	Folding, sorting and degradation	gene16639	BTG2
4	map04714	Thermogenesis	KEGG PATHWAY	4/408	201/11318	0.935313	0.962132	Organismal Systems	Environmental adaptation	gene4973|gene10056|gene6985|gene15359	PRKAA2;ACSL4;ACSL1;FGFR1
1	map03460	Fanconi anemia pathway	KEGG PATHWAY	1/408	58/11318	0.881747	0.96221	Genetic Information Processing	Replication and repair	gene4609	REV3L
3	map04120	Ubiquitin mediated proteolysis	KEGG PATHWAY	3/408	140/11318	0.885291	0.962419	Genetic Information Processing	Folding, sorting and degradation	gene17471|gene8763|gene978	SOCS3;LOC106037125;CBLB
1	map03015	mRNA surveillance pathway	KEGG PATHWAY	1/408	81/11318	0.949442	0.962862	Genetic Information Processing	Translation	gene10590	PPP2R3A
3	map05164	Influenza A	KEGG PATHWAY	3/408	157/11318	0.926082	0.962991	Human Diseases	Infectious disease: viral	gene17471|gene20213|gene16188	SOCS3;IL1B;NFKB1
1	map04927	Cortisol synthesis and secretion	KEGG PATHWAY	1/408	60/11318	0.890161	0.964062	Organismal Systems	Endocrine system	gene18365	ATG101
1	map04260	Cardiac muscle contraction	KEGG PATHWAY	1/408	69/11318	0.921219	0.964927	Organismal Systems	Circulatory system	gene3348	LOC106031415
1	map05214	Glioma	KEGG PATHWAY	1/408	69/11318	0.921219	0.964927	Human Diseases	Cancer: specific types	gene19020	CDKN1A
1	map05322	Systemic lupus erythematosus	KEGG PATHWAY	1/408	93/11318	0.96757	0.977791	Human Diseases	Immune disease	gene1071	CD80
1	map03013	RNA transport	KEGG PATHWAY	1/408	222/11318	0.999734	0.999734	Genetic Information Processing	Translation	gene12081	EEF1A2
3	map05016	Huntington disease	KEGG PATHWAY	3/408	255/11318	0.995521	1	Human Diseases	Neurodegenerative disease	gene6775|gene17469|gene5780	TUBB6;DNAH17;BDNF
1	map04740	Olfactory transduction	KEGG PATHWAY	1/408	156/11318	0.996873	1	Organismal Systems	Sensory system	gene18849	LOC106048249

## Sheet: 70vs120-GO
Number	GO ID	Term Type	Description			Ratio_in_study	Ratio_in_pop	Pvalue	Padjust	Gene_ids	Gene_names
38	GO:0005102	MF	signaling receptor binding			38/422	502/12028	8.68e-06	0.030422	gene12268;gene12788;gene18995;gene4796;gene4789;gene16525;gene923;gene7410;gene20084;gene2150;gene13515;gene20213;gene3937;gene16763;gene7321;gene5780;gene18243;gene19382;gene132;gene12288;gene12185;gene19641;gene11109;gene13258;gene12290;gene12291;gene15999;gene13212;gene16336;gene12509;gene7316;gene12194;gene20591;gene4021;gene5579;gene5943;gene12162;gene576	ACVR2A;LOC106041570;CSF1;TGFBI;CXCL14;AMH;LOC106038263;HTR1A;COL2A1;ITGB6;WNT11;IL1B;ITGBL1;ITGB3;HGF;BDNF;FGF12;STC1;CXCL12;LOC106041089;RIC3;LOC106049124;HSPA8;CXCL1258;LOC106041041;LOC106041042;SEMA4D;CXCL1212;CD9;WNT2B;GNAI1;GHRH;LOC106029448;ADRA2A;SEMA6D;CYR61;ADM;ACOX3
13	GO:0031012	CC	extracellular matrix			13/422	107/12028	9.16e-05	0.136016	gene8680;gene13809;gene16636;gene10690;gene3860;gene6009;gene6007;gene6346;gene8639;gene20084;gene17850;gene5943;gene13515	TNC;VCAN;PRELP;GPC1;COCH;LOC106034204;LOC106034136;FN1;ADAMTS1;COL2A1;MMP9;CYR61;WNT11
4	GO:0044183	MF	protein folding chaperone			4/422	8/12028	9.35e-05	0.136016	gene12027;gene11109;gene12661;gene12185	HSPA5;HSPA8;HSPB1;RIC3
6	GO:2001236	BP	regulation of extrinsic apoptotic signaling pathway			6/422	23/12028	0.000109297	0.136016	gene7321;gene4565;gene9991;gene3742;gene12532;gene20084	HGF;TNFAIP3;DEPTOR;ATF3;G0S2;COL2A1
6	GO:0008009	MF	chemokine activity		regulation of epidermis development	6/422	23/12028	0.000109297	0.136016	gene12290;gene12291;gene4789;gene12288;gene923;gene132	LOC106041041;LOC106041042;CXCL14;LOC106041089;LOC106038263;CXCL12
5	GO:0006040	BP	amino sugar metabolic process			5/422	15/12028	0.000116485	0.136016	gene4826;gene15045;gene16641;gene16642;gene17780	GFPT2;CAT5;LOC106045866;LOC106045865;FN3K
5	GO:0032652	BP	regulation of interleukin-1 production			5/422	16/12028	0.000164576	0.156634	gene15442;gene4693;gene4565;gene12661;gene13258	ANXA1;EGR1;TNFAIP3;HSPB1;CXCL1258
33	GO:0007166	BP	cell surface receptor signaling pathway			33/422	473/12028	0.000167679	0.156634	gene17479;gene4693;gene12268;gene601;gene12661;gene17471;gene16880;gene15442;gene2150;gene13515;gene16763;gene7321;gene18243;gene11164;gene14127;gene132;gene13212;gene8920;gene978;gene12509;gene16250;gene62;gene12532;gene3937;gene8127;gene19317;gene10304;gene7318;gene4580;gene9718;gene20364;gene8639;gene8347	GCGR;EGR1;ACVR2A;EVC2;HSPB1;SOCS3;LOC106046116;ANXA1;ITGB6;WNT11;ITGB3;HGF;FGF12;DIXDC1;BCAR1;CXCL12;CXCL1212;SMAD7;CBLB;WNT2B;NTRK2;LOC106037870;G0S2;ITGBL1;RGMA;MST1R;FOS;CD36;CITED2;ADGRF5;LOC106049872;ADAMTS1;IRAK2
6	GO:0042379	MF	chemokine receptor binding		positive regulation of epithelial cell migration	6/422	25/12028	0.000180658	0.158211	gene12290;gene12291;gene4789;gene12288;gene923;gene132	LOC106041041;LOC106041042;CXCL14;LOC106041089;LOC106038263;CXCL12
46	GO:0060089	MF	molecular transducer activity		skin morphogenesis	46/422	749/12028	0.000192319	0.158516	gene17479;gene12268;gene11543;gene13258;gene1827;gene16880;gene7410;gene4364;gene2150;gene16171;gene8116;gene16609;gene7713;gene17302;gene20455;gene20457;gene19223;gene20453;gene15359;gene18304;gene8042;gene18365;gene20276;gene14895;gene18268;gene4021;gene6855;gene4973;gene19543;gene16692;gene16250;gene62;gene9275;gene18849;gene12815;gene8127;gene19317;gene14051;gene18252;gene12857;gene9718;gene9…	GCGR;ACVR2A;TNFRSF1B;CXCL1258;LOC106047885;LOC106046116;HTR1A;NPY2R;ITGB6;FZD8;AKAP13;ADORA2B;NR4A3;PTAFR;LOC106029317;LOC106029319;LOC106048674;LOC106049954;FGFR1;SUCNR1;RXFP3;ATG101;S1PR2;NR4A2;GPR37;ADRA2A;HTR2A;PRKAA2;GPR182;LOC106045913;NTRK2;LOC106037870;GABRE;LOC106048249;RXRG;RGMA;MST1R;LOC106042984;IL1RAP;LOC106041672;ADGRF5;CSF3R;SSTR2;LOC106049872;THBD;LOC106049633
56	GO:0048523	BP	negative regulation of cellular process			56/422	974/12028	0.000246912	0.159464	gene4693;gene11315;gene12661;gene17471;gene16522;gene9991;gene10690;gene4965;gene12027;gene4361;gene15442;gene2637;gene20084;gene12205;gene1961;gene13515;gene20213;gene16022;gene19547;gene20591;gene7321;gene5464;gene11109;gene9948;gene1789;gene11338;gene13559;gene10560;gene9519;gene13258;gene4789;gene19382;gene4973;gene4565;gene5716;gene16336;gene16576;gene760;gene16250;gene3089;gene11812;gene125…	EGR1;RNF152;HSPB1;SOCS3;DOT1L;DEPTOR;GPC1;JUN;HSPA5;RBM46;ANXA1;BAG2;COL2A1;SDC4;FEZ2;WNT11;IL1B;LOC106045127;NAB2;LOC106029448;HGF;DCUN1D3;HSPA8;MYC;AMIGO2;NABP1;SPRY1;KLF3;STK40;CXCL1258;CXCL14;STC1;PRKAA2;TNFAIP3;DNAJA4;CD9;FAM101B;LOC106036374;NTRK2;LMO3;PIM3;WNT2B;GNAI1;ADRA2A;TRIB2;RGMA;BTG2;ERRFI1;CITED2;ATF3;LOC106046136;CYR61;ARHGAP42;HSPA2;LOC106035954;LOC106048983
4	GO:0042026	BP	protein refolding			4/422	10/12028	0.000265116	0.159464	gene8833;gene5716;gene12027;gene11109	HSPA2;DNAJA4;HSPA5;HSPA8
4	GO:0017017	MF	MAP kinase tyrosine/serine/threonine phosphatase activity		regulation of epidermal growth factor-activated receptor activity	4/422	10/12028	0.000265116	0.159464	gene13729;gene4014;gene13852;gene13882	DUSP8;DUSP5;DUSP1;DUSP7
4	GO:0033549	MF	MAP kinase phosphatase activity		regulation of epidermal growth factor receptor signaling pathway	4/422	10/12028	0.000265116	0.159464	gene13729;gene4014;gene13852;gene13882	DUSP8;DUSP5;DUSP1;DUSP7
10	GO:0005126	MF	cytokine receptor binding		positive regulation of epidermal growth factor-activated receptor activity	10/422	75/12028	0.000273742	0.159464	gene20213;gene12290;gene12291;gene12788;gene20591;gene12288;gene923;gene132;gene12268;gene4789	IL1B;LOC106041041;LOC106041042;LOC106041570;LOC106029448;LOC106041089;LOC106038263;CXCL12;ACVR2A;CXCL14
8	GO:0051082	MF	unfolded protein binding		positive regulation of BMP signaling pathway	8/422	49/12028	0.000273777	0.159464	gene5716;gene7530;gene19111;gene12027;gene5895;gene17700;gene8833;gene11109	DNAJA4;HSP90B1;DNAJB5;HSPA5;DNAJB4;HSP90AA1;HSPA2;HSPA8
61	GO:0048519	BP	negative regulation of biological process			61/422	1098/12028	0.000277743	0.159464	gene4693;gene11315;gene12661;gene13258;gene17471;gene16522;gene9991;gene10690;gene4965;gene12027;gene4361;gene15442;gene2637;gene20084;gene12205;gene1961;gene13515;gene16609;gene16022;gene19547;gene20591;gene7321;gene8380;gene5464;gene11109;gene17581;gene9948;gene1789;gene11338;gene13559;gene10560;gene9519;gene20213;gene4789;gene19382;gene4973;gene4565;gene5716;gene16336;gene16576;gene760;gene162…	EGR1;RNF152;HSPB1;CXCL1258;SOCS3;DOT1L;DEPTOR;GPC1;JUN;HSPA5;RBM46;ANXA1;BAG2;COL2A1;SDC4;FEZ2;WNT11;ADORA2B;LOC106045127;NAB2;LOC106029448;HGF;BHLHE40;DCUN1D3;HSPA8;TNFAIP6;MYC;AMIGO2;NABP1;SPRY1;KLF3;STK40;IL1B;CXCL14;STC1;PRKAA2;TNFAIP3;DNAJA4;CD9;FAM101B;LOC106036374;NTRK2;LMO3;PIM3;THBS2;WNT2B;GNAI1;THBS1;ADRA2A;TRIB2;RGMA;BTG2;ERRFI1;CITED2;ATF3;LOC106046136;CYR61;ARHGAP42;HSPA2;LOC10603595…
6	GO:0005178	MF	integrin binding		positive regulation of fibroblast growth factor production	6/422	27/12028	0.000284514	0.159464	gene3937;gene16763;gene4796;gene16336;gene2150;gene5943	ITGBL1;ITGB3;TGFBI;CD9;ITGB6;CYR61
11	GO:0001664	MF	G protein-coupled receptor binding		regulation of fibroblast growth factor receptor signaling pathway	11/422	91/12028	0.000329302	0.166301	gene4021;gene12290;gene12291;gene4789;gene12288;gene923;gene12509;gene132;gene7316;gene11109;gene13515	ADRA2A;LOC106041041;LOC106041042;CXCL14;LOC106041089;LOC106038263;WNT2B;CXCL12;GNAI1;HSPA8;WNT11
18	GO:0051241	BP	negative regulation of multicellular organismal process			18/422	206/12028	0.000341825	0.166301	gene16609;gene13258;gene7321;gene16576;gene2955;gene8127;gene4565;gene5716;gene16336;gene10690;gene12509;gene15442;gene19382;gene6023;gene15519;gene13515;gene12205;gene3818	ADORA2B;CXCL1258;HGF;FAM101B;TRIB2;RGMA;TNFAIP3;DNAJA4;CD9;GPC1;WNT2B;ANXA1;STC1;ARHGAP42;THBS2;WNT11;SDC4;THBS1
44	GO:0038023	MF	signaling receptor activity		establishment of skin barrier	44/422	730/12028	0.000382113	0.167653	gene17479;gene12268;gene11543;gene13258;gene1827;gene16880;gene7410;gene4364;gene2150;gene16171;gene14895;gene16609;gene7713;gene17302;gene20455;gene20457;gene19223;gene20453;gene15359;gene18304;gene8042;gene18365;gene20276;gene18268;gene4021;gene6855;gene19543;gene16692;gene16250;gene62;gene9275;gene18849;gene12815;gene8127;gene19317;gene14051;gene18252;gene12857;gene9718;gene9522;gene6432;gene2…	GCGR;ACVR2A;TNFRSF1B;CXCL1258;LOC106047885;LOC106046116;HTR1A;NPY2R;ITGB6;FZD8;NR4A2;ADORA2B;NR4A3;PTAFR;LOC106029317;LOC106029319;LOC106048674;LOC106049954;FGFR1;SUCNR1;RXFP3;ATG101;S1PR2;GPR37;ADRA2A;HTR2A;GPR182;LOC106045913;NTRK2;LOC106037870;GABRE;LOC106048249;RXRG;RGMA;MST1R;LOC106042984;IL1RAP;LOC106041672;ADGRF5;CSF3R;SSTR2;LOC106049872;THBD;LOC106049633
3	GO:2001015	BP	negative regulation of skeletal muscle cell differentiation			3/422	5/12028	0.00040681	0.167653	gene12205;gene10690;gene7321	SDC4;GPC1;HGF
3	GO:0048642	BP	negative regulation of skeletal muscle tissue development			3/422	5/12028	0.00040681	0.167653	gene12205;gene10690;gene7321	SDC4;GPC1;HGF
3	GO:1902725	BP	negative regulation of satellite cell differentiation			3/422	5/12028	0.00040681	0.167653	gene12205;gene10690;gene7321	SDC4;GPC1;HGF
3	GO:1902041	BP	regulation of extrinsic apoptotic signaling pathway via death domain receptors			3/422	5/12028	0.00040681	0.167653	gene4565;gene3742;gene7321	TNFAIP3;ATF3;HGF
25	GO:0010941	BP	regulation of cell death			25/422	339/12028	0.000440925	0.169962	gene4693;gene12661;gene17471;gene9991;gene3742;gene15442;gene20084;gene13515;gene20591;gene7321;gene5464;gene1789;gene13108;gene5943;gene9519;gene13258;gene4973;gene4565;gene16250;gene11812;gene4580;gene12081;gene16946;gene12532;gene20501	EGR1;HSPB1;SOCS3;DEPTOR;ATF3;ANXA1;COL2A1;WNT11;LOC106029448;HGF;DCUN1D3;AMIGO2;SLC25A24;CYR61;STK40;CXCL1258;PRKAA2;TNFAIP3;NTRK2;PIM3;CITED2;EEF1A2;LOC106046136;G0S2;LOC106029353
24	GO:0042981	BP	regulation of apoptotic process			24/422	315/12028	0.0004488	0.169962	gene4693;gene12661;gene17471;gene9991;gene3742;gene15442;gene20084;gene13515;gene20591;gene7321;gene5464;gene1789;gene5943;gene9519;gene13258;gene4973;gene4565;gene16250;gene11812;gene4580;gene12081;gene16946;gene12532;gene20501	EGR1;HSPB1;SOCS3;DEPTOR;ATF3;ANXA1;COL2A1;WNT11;LOC106029448;HGF;DCUN1D3;AMIGO2;CYR61;STK40;CXCL1258;PRKAA2;TNFAIP3;NTRK2;PIM3;CITED2;EEF1A2;LOC106046136;G0S2;LOC106029353
24	GO:0043067	BP	regulation of programmed cell death		regulation of epidermal cell differentiation	24/422	320/12028	0.00050614	0.176313	gene4693;gene12661;gene17471;gene9991;gene3742;gene15442;gene20084;gene13515;gene20591;gene7321;gene5464;gene1789;gene5943;gene9519;gene13258;gene4973;gene4565;gene16250;gene11812;gene4580;gene12081;gene16946;gene12532;gene20501	EGR1;HSPB1;SOCS3;DEPTOR;ATF3;ANXA1;COL2A1;WNT11;LOC106029448;HGF;DCUN1D3;AMIGO2;CYR61;STK40;CXCL1258;PRKAA2;TNFAIP3;NTRK2;PIM3;CITED2;EEF1A2;LOC106046136;G0S2;LOC106029353
20	GO:0071310	BP	cellular response to organic substance		regulation of epidermis development	20/422	243/12028	0.000514764	0.176313	gene18979;gene4693;gene16763;gene7321;gene15274;gene4973;gene7316;gene16443;gene16250;gene3578;gene4826;gene15442;gene12027;gene6432;gene14127;gene6427;gene20084;gene4965;gene4021;gene11109	RFX2;EGR1;ITGB3;HGF;SLC2A5;PRKAA2;GNAI1;B3GNT2;NTRK2;HSPB8;GFPT2;ANXA1;HSPA5;SSTR2;BCAR1;CDC42EP4;COL2A1;JUN;ADRA2A;HSPA8
7	GO:0019838	MF	growth factor binding		epithelial cell maturation	7/422	42/12028	0.000579814	0.188172	gene20213;gene12268;gene4522;gene9522;gene16250;gene20084;gene5943	IL1B;ACVR2A;CTGF;CSF3R;NTRK2;COL2A1;CYR61
4	GO:0032651	BP	regulation of interleukin-1 beta production		regulation of epithelial cell differentiation	4/422	12/12028	0.000590891	0.188172	gene13258;gene4565;gene12661;gene4693	CXCL1258;TNFAIP3;HSPB1;EGR1
15	GO:0043066	BP	negative regulation of apoptotic process		epithelial cell proliferation	15/422	163/12028	0.000611866	0.190522	gene20591;gene12661;gene7321;gene17471;gene4565;gene16250;gene4580;gene4973;gene1789;gene16946;gene11812;gene20084;gene9519;gene5943;gene13515	LOC106029448;HSPB1;HGF;SOCS3;TNFAIP3;NTRK2;CITED2;PRKAA2;AMIGO2;LOC106046136;PIM3;COL2A1;STK40;CYR61;WNT11
29	GO:0003700	MF	DNA-binding transcription factor activity		positive regulation of epithelial cell migration	29/422	427/12028	0.000668863	0.203742	gene4693;gene10385;gene4965;gene3742;gene6436;gene2053;gene14895;gene18979;gene9224;gene7498;gene18323;gene9948;gene9821;gene18365;gene16188;gene10560;gene8920;gene19547;gene16655;gene8380;gene7713;gene12815;gene5536;gene19337;gene14493;gene10307;gene10304;gene4580;gene20646	EGR1;KLF6;JUN;ATF3;SOX9;FOSL2;NR4A2;RFX2;PASD1;ZBED1;TSC22D2;MYC;NFATC1;ATG101;NFKB1;KLF3;SMAD7;NAB2;FOXP4;BHLHE40;NR4A3;RXRG;MAFK;ETV4;BACH1;JDP2;FOS;CITED2;LOC106029507
23	GO:0070887	BP	cellular response to chemical stimulus		skin morphogenesis	23/422	306/12028	0.00068553	0.204376	gene4693;gene4965;gene12027;gene15442;gene20084;gene6432;gene18979;gene15274;gene16763;gene7321;gene16443;gene14127;gene13108;gene11109;gene4973;gene4565;gene3578;gene16250;gene6427;gene7316;gene4021;gene10304;gene4826	EGR1;JUN;HSPA5;ANXA1;COL2A1;SSTR2;RFX2;SLC2A5;ITGB3;HGF;B3GNT2;BCAR1;SLC25A24;HSPA8;PRKAA2;TNFAIP3;HSPB8;NTRK2;CDC42EP4;GNAI1;ADRA2A;FOS;GFPT2
15	GO:0043069	BP	negative regulation of programmed cell death		negative regulation of epidermal growth factor-activated receptor activity	15/422	167/12028	0.000787884	0.209501	gene20591;gene12661;gene7321;gene17471;gene4565;gene16250;gene4580;gene4973;gene1789;gene16946;gene11812;gene20084;gene9519;gene5943;gene13515	LOC106029448;HSPB1;HGF;SOCS3;TNFAIP3;NTRK2;CITED2;PRKAA2;AMIGO2;LOC106046136;PIM3;COL2A1;STK40;CYR61;WNT11
3	GO:0034620	BP	cellular response to unfolded protein		mesenchymal-epithelial cell signaling	3/422	6/12028	0.00079243	0.209501	gene12027;gene11109;gene3578	HSPA5;HSPA8;HSPB8
3	GO:0048635	BP	negative regulation of muscle organ development		regulation of epidermal growth factor-activated receptor activity	3/422	6/12028	0.00079243	0.209501	gene12205;gene10690;gene7321	SDC4;GPC1;HGF
3	GO:0045843	BP	negative regulation of striated muscle tissue development		regulation of epidermal growth factor receptor signaling pathway	3/422	6/12028	0.00079243	0.209501	gene12205;gene10690;gene7321	SDC4;GPC1;HGF
4	GO:0061097	BP	regulation of protein tyrosine kinase activity		positive regulation of epidermal growth factor-activated receptor activity	4/422	13/12028	0.000829991	0.215367	gene4021;gene17925;gene12205;gene16763	ADRA2A;ERRFI1;SDC4;ITGB3
11	GO:2000147	BP	positive regulation of cell motility		BMP signaling pathway	11/422	103/12028	0.000953315	0.24287	gene4021;gene13258;gene7321;gene12661;gene4789;gene14127;gene16763;gene5943;gene15442;gene11109;gene13515	ADRA2A;CXCL1258;HGF;HSPB1;CXCL14;BCAR1;ITGB3;CYR61;ANXA1;HSPA8;WNT11
6	GO:0060326	BP	cell chemotaxis		epithelial cell morphogenesis	6/422	34/12028	0.00105031	0.25447	gene20213;gene7321;gene14127;gene9522;gene120;gene15442	IL1B;HGF;BCAR1;CSF3R;CH25H;ANXA1
9	GO:0001819	BP	positive regulation of cytokine production		positive regulation of fibroblast growth factor production	9/422	74/12028	0.00108377	0.256844	gene16609;gene4693;gene7321;gene12661;gene13258;gene12509;gene15442;gene4021;gene13515	ADORA2B;EGR1;HGF;HSPB1;CXCL1258;WNT2B;ANXA1;ADRA2A;WNT11
8	GO:0005125	MF	cytokine activity		regulation of fibroblast growth factor receptor signaling pathway	8/422	60/12028	0.00110991	0.256844	gene20213;gene12290;gene12291;gene4789;gene18995;gene12288;gene923;gene132	IL1B;LOC106041041;LOC106041042;CXCL14;CSF1;LOC106041089;LOC106038263;CXCL12
30	GO:0044421	CC	extracellular region part		regulation of epidermal cell division	30/422	463/12028	0.00113038	0.256844	gene11981;gene10690;gene12291;gene15442;gene20084;gene17850;gene13515;gene20213;gene13809;gene7321;gene15176;gene3860;gene18995;gene11109;gene8680;gene12290;gene913;gene19382;gene16336;gene12509;gene6346;gene760;gene3818;gene16636;gene1718;gene5943;gene6007;gene6009;gene8639;gene19513	PHF19;GPC1;LOC106041042;ANXA1;COL2A1;MMP9;WNT11;IL1B;VCAN;HGF;LOC106044180;COCH;CSF1;HSPA8;TNC;LOC106041041;F5;STC1;CD9;WNT2B;FN1;LOC106036374;THBS1;PRELP;CPM;CYR61;LOC106034136;LOC106034204;ADAMTS1;LOC106048983
11	GO:0051272	BP	positive regulation of cellular component movement		establishment of skin barrier	11/422	106/12028	0.00120987	0.256844	gene4021;gene13258;gene7321;gene12661;gene4789;gene14127;gene16763;gene5943;gene15442;gene11109;gene13515	ADRA2A;CXCL1258;HGF;HSPB1;CXCL14;BCAR1;ITGB3;CYR61;ANXA1;HSPA8;WNT11
2	GO:1902724	BP	positive regulation of skeletal muscle satellite cell proliferation		keratinocyte development	2/422	2/12028	0.00122813	0.256844	gene10690;gene7321	GPC1;HGF
2	GO:1902042	BP	negative regulation of extrinsic apoptotic signaling pathway via death domain receptors		keratinocyte differentiation	2/422	2/12028	0.00122813	0.256844	gene4565;gene7321	TNFAIP3;HGF
2	GO:0002676	BP	regulation of chronic inflammatory response		epidermis development	2/422	2/12028	0.00122813	0.256844	gene16609;gene4565	ADORA2B;TNFAIP3
2	GO:0033690	BP	positive regulation of osteoblast proliferation			2/422	2/12028	0.00122813	0.256844	gene16763;gene5943	ITGB3;CYR61
2	GO:0090084	BP	negative regulation of inclusion body assembly			2/422	2/12028	0.00122813	0.256844	gene8833;gene5716	HSPA2;DNAJA4
25	GO:0010033	BP	response to organic substance			25/422	365/12028	0.00129622	0.262862	gene4693;gene16443;gene4965;gene12027;gene15442;gene20084;gene6432;gene18979;gene15274;gene20213;gene16763;gene7321;gene15176;gene14127;gene11109;gene13258;gene4973;gene4565;gene16336;gene3578;gene16250;gene6427;gene7316;gene4021;gene4826	EGR1;B3GNT2;JUN;HSPA5;ANXA1;COL2A1;SSTR2;RFX2;SLC2A5;IL1B;ITGB3;HGF;LOC106044180;BCAR1;HSPA8;CXCL1258;PRKAA2;TNFAIP3;CD9;HSPB8;NTRK2;CDC42EP4;GNAI1;ADRA2A;GFPT2
3	GO:0014842	BP	regulation of skeletal muscle satellite cell proliferation			3/422	7/12028	0.0013507	0.262862	gene12205;gene10690;gene7321	SDC4;GPC1;HGF
3	GO:0001659	BP	temperature homeostasis			3/422	7/12028	0.0013507	0.262862	gene20213;gene4693;gene4973	IL1B;EGR1;PRKAA2
3	GO:1901862	BP	negative regulation of muscle tissue development			3/422	7/12028	0.0013507	0.262862	gene12205;gene10690;gene7321	SDC4;GPC1;HGF
37	GO:0051239	BP	regulation of multicellular organismal process			37/422	612/12028	0.00140715	0.264346	gene4693;gene12268;gene18995;gene10690;gene13699;gene15442;gene12205;gene13515;gene16609;gene12661;gene7321;gene18243;gene14127;gene1789;gene19011;gene13559;gene5943;gene13258;gene16576;gene19382;gene4565;gene5716;gene16336;gene12509;gene16250;gene15519;gene4021;gene3818;gene8127;gene17925;gene7400;gene4580;gene9522;gene6023;gene12532;gene10304;gene2955	EGR1;ACVR2A;CSF1;GPC1;PHLDA2;ANXA1;SDC4;WNT11;ADORA2B;HSPB1;HGF;FGF12;BCAR1;AMIGO2;KCNA2;SPRY1;CYR61;CXCL1258;FAM101B;STC1;TNFAIP3;DNAJA4;CD9;WNT2B;NTRK2;THBS2;ADRA2A;THBS1;RGMA;ERRFI1;ZSWIM6;CITED2;CSF3R;ARHGAP42;G0S2;FOS;TRIB2
11	GO:0040017	BP	positive regulation of locomotion			11/422	108/12028	0.00141057	0.264346	gene4021;gene13258;gene7321;gene12661;gene4789;gene14127;gene16763;gene5943;gene15442;gene11109;gene13515	ADRA2A;CXCL1258;HGF;HSPB1;CXCL14;BCAR1;ITGB3;CYR61;ANXA1;HSPA8;WNT11
6	GO:0009266	BP	response to temperature stimulus			6/422	36/12028	0.00143379	0.264346	gene20213;gene5716;gene12027;gene17700;gene8833;gene11109	IL1B;DNAJA4;HSPA5;HSP90AA1;HSPA2;HSPA8
5	GO:0009408	BP	response to heat			5/422	25/12028	0.00154247	0.277645	gene8833;gene5716;gene12027;gene11109;gene17700	HSPA2;DNAJA4;HSPA5;HSPA8;HSP90AA1
59	GO:0050896	BP	response to stimulus			59/422	1123/12028	0.00154556	0.277645	gene4693;gene11315;gene12788;gene12661;gene13258;gene12288;gene4965;gene923;gene12027;gene3742;gene7410;gene15442;gene11543;gene20084;gene6432;gene13515;gene18979;gene15274;gene20213;gene3268;gene16763;gene7321;gene8380;gene5464;gene15176;gene16443;gene14127;gene132;gene1504;gene17700;gene3860;gene19641;gene11109;gene13108;gene16609;gene12290;gene12291;gene4789;gene4973;gene4565;gene5716;gene1633…	EGR1;RNF152;LOC106041570;HSPB1;CXCL1258;LOC106041089;JUN;LOC106038263;HSPA5;ATF3;HTR1A;ANXA1;TNFRSF1B;COL2A1;SSTR2;WNT11;RFX2;SLC2A5;IL1B;UNG;ITGB3;HGF;BHLHE40;DCUN1D3;LOC106044180;B3GNT2;BCAR1;CXCL12;CAT;HSP90AA1;COCH;LOC106049124;HSPA8;SLC25A24;ADORA2B;LOC106041041;LOC106041042;CXCL14;PRKAA2;TNFAIP3;DNAJA4;CD9;HSPB8;WNT2B;NTRK2;REV3L;CDC42EP4;GNAI1;ADRA2A;THBS1;FOS;CD36;GFPT2;LOC106049872;NABP1…
15	GO:0060548	BP	negative regulation of cell death			15/422	179/12028	0.00159361	0.282655	gene20591;gene12661;gene7321;gene17471;gene4565;gene16250;gene4580;gene4973;gene1789;gene16946;gene11812;gene20084;gene9519;gene5943;gene13515	LOC106029448;HSPB1;HGF;SOCS3;TNFAIP3;NTRK2;CITED2;PRKAA2;AMIGO2;LOC106046136;PIM3;COL2A1;STK40;CYR61;WNT11
6	GO:0071363	BP	cellular response to growth factor stimulus			6/422	37/12028	0.00166149	0.29101	gene16763;gene7321;gene14127;gene16250;gene15442;gene20084	ITGB3;HGF;BCAR1;NTRK2;ANXA1;COL2A1
38	GO:0004888	MF	transmembrane signaling receptor activity			38/422	646/12028	0.00188009	0.31661	gene17479;gene12268;gene11543;gene13258;gene1827;gene16880;gene7410;gene4364;gene16171;gene16609;gene17302;gene20455;gene20457;gene19223;gene20453;gene15359;gene18304;gene6432;gene20276;gene18268;gene4021;gene6855;gene19543;gene16692;gene16250;gene62;gene9275;gene18849;gene8042;gene14051;gene19317;gene18252;gene12857;gene9718;gene9522;gene20364;gene13386;gene20137	GCGR;ACVR2A;TNFRSF1B;CXCL1258;LOC106047885;LOC106046116;HTR1A;NPY2R;FZD8;ADORA2B;PTAFR;LOC106029317;LOC106029319;LOC106048674;LOC106049954;FGFR1;SUCNR1;SSTR2;S1PR2;GPR37;ADRA2A;HTR2A;GPR182;LOC106045913;NTRK2;LOC106037870;GABRE;LOC106048249;RXFP3;LOC106042984;MST1R;IL1RAP;LOC106041672;ADGRF5;CSF3R;LOC106049872;THBD;LOC106049633
21	GO:0031226	CC	intrinsic component of plasma membrane			21/422	294/12028	0.00191134	0.31661	gene4021;gene15274;gene16496;gene12268;gene17501;gene16763;gene826;gene6855;gene9430;gene18999;gene16336;gene10690;gene1827;gene15435;gene14760;gene16250;gene7410;gene13258;gene2146;gene6432;gene16394	ADRA2A;SLC2A5;MFSD12;ACVR2A;SLC16A3;ITGB3;KCNK10;HTR2A;MFSD2A;SLC6A17;CD9;GPC1;LOC106047885;TMEM2;SLCO4C1;NTRK2;HTR1A;CXCL1258;SLC4A3;SSTR2;EDA2R
10	GO:0030335	BP	positive regulation of cell migration			10/422	96/12028	0.00194007	0.31661	gene4021;gene13258;gene7321;gene12661;gene4789;gene14127;gene16763;gene15442;gene5943;gene13515	ADRA2A;CXCL1258;HGF;HSPB1;CXCL14;BCAR1;ITGB3;ANXA1;CYR61;WNT11
4	GO:0035914	BP	skeletal muscle cell differentiation			4/422	16/12028	0.00194322	0.31661	gene4693;gene10304;gene3742;gene4580	EGR1;FOS;ATF3;CITED2
4	GO:0005540	MF	hyaluronic acid binding			4/422	16/12028	0.00194322	0.31661	gene19504;gene17581;gene1496;gene13809	LOC106048966;TNFAIP6;CD44;VCAN
13	GO:0007167	BP	enzyme linked receptor protein signaling pathway			13/422	147/12028	0.0019888	0.320312	gene4693;gene7321;gene12268;gene16763;gene12661;gene8127;gene8920;gene19317;gene10304;gene14127;gene4580;gene18243;gene16250	EGR1;HGF;ACVR2A;ITGB3;HSPB1;RGMA;SMAD7;MST1R;FOS;BCAR1;CITED2;FGF12;NTRK2
3	GO:0035967	BP	cellular response to topologically incorrect protein			3/422	8/12028	0.00210504	0.331414	gene12027;gene11109;gene3578	HSPA5;HSPA8;HSPB8
3	GO:0014857	BP	regulation of skeletal muscle cell proliferation			3/422	8/12028	0.00210504	0.331414	gene12205;gene10690;gene7321	SDC4;GPC1;HGF
6	GO:0070848	BP	response to growth factor			6/422	39/12028	0.00219813	0.342224	gene16763;gene7321;gene14127;gene16250;gene15442;gene20084	ITGB3;HGF;BCAR1;NTRK2;ANXA1;COL2A1
16	GO:0048018	MF	receptor ligand activity			16/422	195/12028	0.00229878	0.349412	gene20213;gene12290;gene12291;gene18995;gene7321;gene5780;gene18243;gene12288;gene4789;gene19382;gene16525;gene923;gene132;gene12162;gene12194;gene13515	IL1B;LOC106041041;LOC106041042;CSF1;HGF;BDNF;FGF12;LOC106041089;CXCL14;STC1;AMH;LOC106038263;CXCL12;ADM;GHRH;WNT11
16	GO:0040012	BP	regulation of locomotion			16/422	196/12028	0.00234404	0.349412	gene4021;gene13258;gene12661;gene7321;gene19382;gene4789;gene16336;gene14127;gene13699;gene7400;gene5943;gene15442;gene13515;gene5716;gene11109;gene16763	ADRA2A;CXCL1258;HSPB1;HGF;STC1;CXCL14;CD9;BCAR1;PHLDA2;ZSWIM6;CYR61;ANXA1;WNT11;DNAJA4;HSPA8;ITGB3
16	GO:0030546	MF	signaling receptor activator activity			16/422	196/12028	0.00234404	0.349412	gene20213;gene12290;gene12291;gene18995;gene7321;gene5780;gene18243;gene12288;gene4789;gene19382;gene16525;gene923;gene132;gene12162;gene12194;gene13515	IL1B;LOC106041041;LOC106041042;CSF1;HGF;BDNF;FGF12;LOC106041089;CXCL14;STC1;AMH;LOC106038263;CXCL12;ADM;GHRH;WNT11
9	GO:0006457	BP	protein folding			9/422	83/12028	0.00244431	0.356768	gene12661;gene5716;gene7530;gene19111;gene12027;gene5895;gene17700;gene8833;gene11109	HSPB1;DNAJA4;HSP90B1;DNAJB5;HSPA5;DNAJB4;HSP90AA1;HSPA2;HSPA8
6	GO:2000027	BP	regulation of animal organ morphogenesis			6/422	40/12028	0.00251092	0.362712	gene7321;gene4565;gene4580;gene12509;gene13515;gene13559	HGF;TNFAIP3;CITED2;WNT2B;WNT11;SPRY1
16	GO:0051270	BP	regulation of cellular component movement			16/422	200/12028	0.00257251	0.364102	gene4021;gene13258;gene12661;gene7321;gene19382;gene4789;gene16336;gene14127;gene13699;gene7400;gene5943;gene15442;gene13515;gene5716;gene11109;gene16763	ADRA2A;CXCL1258;HSPB1;HGF;STC1;CXCL14;CD9;BCAR1;PHLDA2;ZSWIM6;CYR61;ANXA1;WNT11;DNAJA4;HSPA8;ITGB3
16	GO:0030545	MF	receptor regulator activity			16/422	200/12028	0.00257251	0.364102	gene20213;gene12290;gene12291;gene18995;gene7321;gene5780;gene18243;gene12288;gene4789;gene19382;gene16525;gene923;gene132;gene12162;gene12194;gene13515	IL1B;LOC106041041;LOC106041042;CSF1;HGF;BDNF;FGF12;LOC106041089;CXCL14;STC1;AMH;LOC106038263;CXCL12;ADM;GHRH;WNT11
14	GO:0030334	BP	regulation of cell migration			14/422	170/12028	0.00264868	0.367458	gene4021;gene13258;gene16763;gene7321;gene19382;gene4789;gene16336;gene14127;gene13699;gene5943;gene15442;gene5716;gene12661;gene13515	ADRA2A;CXCL1258;ITGB3;HGF;STC1;CXCL14;CD9;BCAR1;PHLDA2;CYR61;ANXA1;DNAJA4;HSPB1;WNT11
20	GO:0005887	CC	integral component of plasma membrane			20/422	282/12028	0.00268817	0.369281	gene4021;gene15274;gene16496;gene12268;gene17501;gene16763;gene826;gene6855;gene9430;gene18999;gene16336;gene1827;gene15435;gene14760;gene16250;gene7410;gene13258;gene2146;gene6432;gene16394	ADRA2A;SLC2A5;MFSD12;ACVR2A;SLC16A3;ITGB3;KCNK10;HTR2A;MFSD2A;SLC6A17;CD9;LOC106047885;TMEM2;SLCO4C1;NTRK2;HTR1A;CXCL1258;SLC4A3;SSTR2;EDA2R
17	GO:0040011	BP	locomotion			17/422	226/12028	0.00286032	0.389114	gene20213;gene3937;gene16763;gene7321;gene17302;gene4565;gene14127;gene16692;gene9522;gene15442;gene14442;gene120;gene6346;gene12205;gene16250;gene5943;gene13515	IL1B;ITGBL1;ITGB3;HGF;PTAFR;TNFAIP3;BCAR1;LOC106045913;CSF3R;ANXA1;RCAN1;CH25H;FN1;SDC4;NTRK2;CYR61;WNT11
14	GO:0016477	BP	cell migration			14/422	172/12028	0.0029484	0.39724	gene20213;gene3937;gene16763;gene7321;gene4565;gene14127;gene16250;gene9522;gene15442;gene120;gene6346;gene12205;gene5943;gene13515	IL1B;ITGBL1;ITGB3;HGF;TNFAIP3;BCAR1;NTRK2;CSF3R;ANXA1;CH25H;FN1;SDC4;CYR61;WNT11
3	GO:0003156	BP	regulation of animal organ formation			3/422	9/12028	0.00307576	0.410453	gene13559;gene4580;gene12509	SPRY1;CITED2;WNT2B
7	GO:0030424	CC	axon			7/422	56/12028	0.0032727	0.414096	gene4973;gene19389;gene16250;gene19011;gene2637;gene1961;gene11109	PRKAA2;NEFL;NTRK2;KCNA2;BAG2;FEZ2;HSPA8
8	GO:0006935	BP	chemotaxis			8/422	71/12028	0.00330348	0.414096	gene20213;gene7321;gene17302;gene14127;gene16692;gene9522;gene120;gene15442	IL1B;HGF;PTAFR;BCAR1;LOC106045913;CSF3R;CH25H;ANXA1
8	GO:0031406	MF	carboxylic acid binding			8/422	71/12028	0.00330348	0.414096	gene1496;gene13809;gene8070;gene17581;gene2802;gene19504;gene576;gene8066	CD44;VCAN;LOC106036308;TNFAIP6;LOC106030656;LOC106048966;ACOX3;LOC106036393
15	GO:2000145	BP	regulation of cell motility			15/422	185/12028	0.00348631	0.414096	gene4021;gene13258;gene12661;gene7321;gene19382;gene4789;gene16336;gene14127;gene13699;gene5943;gene15442;gene13515;gene5716;gene11109;gene16763	ADRA2A;CXCL1258;HSPB1;HGF;STC1;CXCL14;CD9;BCAR1;PHLDA2;CYR61;ANXA1;WNT11;DNAJA4;HSPA8;ITGB3
30	GO:0050793	BP	regulation of developmental process			30/422	490/12028	0.00350964	0.414096	gene12268;gene12661;gene10690;gene4965;gene13699;gene15442;gene12205;gene13515;gene16763;gene7321;gene1789;gene18995;gene13559;gene5943;gene4789;gene4565;gene16576;gene12509;gene7400;gene3089;gene6427;gene15519;gene3818;gene8127;gene17925;gene16250;gene4580;gene9522;gene10304;gene2955	ACVR2A;HSPB1;GPC1;JUN;PHLDA2;ANXA1;SDC4;WNT11;ITGB3;HGF;AMIGO2;CSF1;SPRY1;CYR61;CXCL14;TNFAIP3;FAM101B;WNT2B;ZSWIM6;LMO3;CDC42EP4;THBS2;THBS1;RGMA;ERRFI1;NTRK2;CITED2;CSF3R;FOS;TRIB2
22	GO:0005576	CC	extracellular region			22/422	330/12028	0.00357837	0.414096	gene12288;gene16525;gene923;gene2831;gene13515;gene16641;gene5780;gene13212;gene9100;gene132;gene5943;gene12291;gene4789;gene19382;gene11832;gene12509;gene4522;gene15519;gene12194;gene16642;gene12162;gene6346	LOC106041089;AMH;LOC106038263;PI15;WNT11;LOC106045866;BDNF;CXCL1212;PON2;CXCL12;CYR61;LOC106041042;CXCL14;STC1;ANOS1;WNT2B;CTGF;THBS2;GHRH;LOC106045865;ADM;FN1
5	GO:1903034	BP	regulation of response to wounding			5/422	30/12028	0.00358272	0.414096	gene15442;gene13258;gene16336;gene4021;gene8127	ANXA1;CXCL1258;CD9;ADRA2A;RGMA
2	GO:0031649	BP	heat generation			2/422	3/12028	0.0035986	0.414096	gene4973;gene20213	PRKAA2;IL1B
2	GO:1903523	BP	negative regulation of blood circulation			2/422	3/12028	0.0035986	0.414096	gene6023;gene13258	ARHGAP42;CXCL1258
2	GO:0014858	BP	positive regulation of skeletal muscle cell proliferation			2/422	3/12028	0.0035986	0.414096	gene10690;gene7321	GPC1;HGF
2	GO:0090083	BP	regulation of inclusion body assembly			2/422	3/12028	0.0035986	0.414096	gene8833;gene5716	HSPA2;DNAJA4
2	GO:0033693	BP	neurofilament bundle assembly			2/422	3/12028	0.0035986	0.414096	gene19389;gene19388	NEFL;NEFM
8	GO:0043177	MF	organic acid binding			8/422	72/12028	0.00360546	0.414096	gene1496;gene13809;gene8070;gene17581;gene2802;gene19504;gene576;gene8066	CD44;VCAN;LOC106036308;TNFAIP6;LOC106030656;LOC106048966;ACOX3;LOC106036393
19	GO:0007155	BP	cell adhesion			19/422	270/12028	0.00378011	0.420373	gene19504;gene3937;gene16763;gene3818;gene8680;gene4796;gene16336;gene17581;gene16880;gene13809;gene8620;gene20275;gene8958;gene17535;gene6346;gene15519;gene2150;gene5943;gene1496	LOC106048966;ITGBL1;ITGB3;THBS1;TNC;TGFBI;CD9;TNFAIP6;LOC106046116;VCAN;NCAM2;LOC106049783;PCDH19;VMP1;FN1;THBS2;ITGB6;CYR61;CD44
19	GO:0022610	BP	biological adhesion			19/422	271/12028	0.00388968	0.426589	gene19504;gene3937;gene16763;gene3818;gene8680;gene4796;gene16336;gene17581;gene16880;gene13809;gene8620;gene20275;gene8958;gene17535;gene6346;gene15519;gene2150;gene5943;gene1496	LOC106048966;ITGBL1;ITGB3;THBS1;TNC;TGFBI;CD9;TNFAIP6;LOC106046116;VCAN;NCAM2;LOC106049783;PCDH19;VMP1;FN1;THBS2;ITGB6;CYR61;CD44
11	GO:0001817	BP	regulation of cytokine production			11/422	123/12028	0.00395022	0.429074	gene16609;gene13258;gene7321;gene12661;gene2955;gene4693;gene4565;gene12509;gene15442;gene4021;gene13515	ADORA2B;CXCL1258;HGF;HSPB1;TRIB2;EGR1;TNFAIP3;WNT2B;ANXA1;ADRA2A;WNT11
7	GO:0034330	BP	cell junction organization			7/422	58/12028	0.00399659	0.430771	gene13258;gene16336;gene16763;gene19456;gene6346;gene17535;gene13515	CXCL1258;CD9;ITGB3;FLNC;FN1;VMP1;WNT11
6	GO:0034329	BP	cell junction assembly			6/422	44/12028	0.0041051	0.43343	gene16336;gene16763;gene19456;gene6346;gene17535;gene13515	CD9;ITGB3;FLNC;FN1;VMP1;WNT11
6	GO:0007178	BP	transmembrane receptor protein serine/threonine kinase signaling pathway			6/422	44/12028	0.0041051	0.43343	gene4693;gene12268;gene8127;gene8920;gene10304;gene4580	EGR1;ACVR2A;RGMA;SMAD7;FOS;CITED2
21	GO:0051240	BP	positive regulation of multicellular organismal process			21/422	310/12028	0.00413362	0.43343	gene16609;gene4693;gene12268;gene12661;gene7321;gene13258;gene4565;gene10304;gene10690;gene14127;gene4580;gene12509;gene16250;gene1789;gene15442;gene12532;gene18995;gene13559;gene4021;gene5943;gene13515	ADORA2B;EGR1;ACVR2A;HSPB1;HGF;CXCL1258;TNFAIP3;FOS;GPC1;BCAR1;CITED2;WNT2B;NTRK2;AMIGO2;ANXA1;G0S2;CSF1;SPRY1;ADRA2A;CYR61;WNT11
15	GO:0032101	BP	regulation of response to external stimulus			15/422	192/12028	0.004145	0.43343	gene16609;gene13258;gene20213;gene7321;gene12661;gene8127;gene4565;gene4789;gene16336;gene17581;gene15442;gene7400;gene2802;gene3860;gene8347	ADORA2B;CXCL1258;IL1B;HGF;HSPB1;RGMA;TNFAIP3;CXCL14;CD9;TNFAIP6;ANXA1;ZSWIM6;LOC106030656;COCH;IRAK2
3	GO:0014068	BP	positive regulation of phosphatidylinositol 3-kinase signaling			3/422	10/12028	0.00428032	0.440999	gene13258;gene16250;gene7321	CXCL1258;NTRK2;HGF
3	GO:0050840	MF	extracellular matrix binding			3/422	10/12028	0.00428032	0.440999	gene4796;gene3818;gene5943	TGFBI;THBS1;CYR61
7	GO:0071496	BP	cellular response to external stimulus			7/422	59/12028	0.00440109	0.450132	gene16609;gene11315;gene4973;gene10304;gene12509;gene3742;gene13515	ADORA2B;RNF152;PRKAA2;FOS;WNT2B;ATF3;WNT11
21	GO:0048585	BP	negative regulation of response to stimulus			21/422	314/12028	0.00450764	0.457689	gene4021;gene4693;gene11315;gene12661;gene7321;gene8127;gene4973;gene4565;gene17925;gene16336;gene17581;gene15442;gene12027;gene3742;gene9991;gene20213;gene6023;gene3089;gene20084;gene13559;gene13515	ADRA2A;EGR1;RNF152;HSPB1;HGF;RGMA;PRKAA2;TNFAIP3;ERRFI1;CD9;TNFAIP6;ANXA1;HSPA5;ATF3;DEPTOR;IL1B;ARHGAP42;LMO3;COL2A1;SPRY1;WNT11
4	GO:0034614	BP	cellular response to reactive oxygen species			4/422	20/12028	0.00462949	0.457938	gene4973;gene4565;gene15442;gene10304	PRKAA2;TNFAIP3;ANXA1;FOS
4	GO:0033293	MF	monocarboxylic acid binding			4/422	20/12028	0.00462949	0.457938	gene8066;gene576;gene8070;gene2802	LOC106036393;ACOX3;LOC106036308;LOC106030656
8	GO:0031331	BP	positive regulation of cellular catabolic process			8/422	75/12028	0.00464082	0.457938	gene4021;gene11315;gene2955;gene4973;gene4565;gene3578;gene7411;gene2637	ADRA2A;RNF152;TRIB2;PRKAA2;TNFAIP3;HSPB8;RNF180;BAG2
8	GO:0042330	BP	taxis			8/422	75/12028	0.00464082	0.457938	gene20213;gene7321;gene17302;gene14127;gene16692;gene9522;gene120;gene15442	IL1B;HGF;PTAFR;BCAR1;LOC106045913;CSF3R;CH25H;ANXA1
27	GO:0004930	MF	G protein-coupled receptor activity			27/422	443/12028	0.00522477	0.511954	gene17479;gene13258;gene1827;gene16880;gene7410;gene4364;gene6432;gene16609;gene20455;gene20457;gene19223;gene20453;gene18304;gene20276;gene18268;gene4021;gene6855;gene19543;gene16692;gene62;gene18849;gene8042;gene14051;gene9718;gene17302;gene20364;gene20137	GCGR;CXCL1258;LOC106047885;LOC106046116;HTR1A;NPY2R;SSTR2;ADORA2B;LOC106029317;LOC106029319;LOC106048674;LOC106049954;SUCNR1;S1PR2;GPR37;ADRA2A;HTR2A;GPR182;LOC106045913;LOC106037870;LOC106048249;RXFP3;LOC106042984;ADGRF5;PTAFR;LOC106049872;LOC106049633
4	GO:2000241	BP	regulation of reproductive process			4/422	21/12028	0.00556275	0.537553	gene13699;gene15176;gene11109;gene4580	PHLDA2;LOC106044180;HSPA8;CITED2
4	GO:0060560	BP	developmental growth involved in morphogenesis			4/422	21/12028	0.00556275	0.537553	gene6346;gene16250;gene1932;gene13559	FN1;NTRK2;KIF26B;SPRY1
3	GO:0006986	BP	response to unfolded protein			3/422	11/12028	0.00573353	0.542826	gene12027;gene11109;gene3578	HSPA5;HSPA8;HSPB8
3	GO:0009409	BP	response to cold			3/422	11/12028	0.00573353	0.542826	gene20213;gene8833;gene17700	IL1B;HSPA2;HSP90AA1
3	GO:0101031	CC	chaperone complex			3/422	11/12028	0.00573353	0.542826	gene2637;gene11109;gene3578	BAG2;HSPA8;HSPB8
32	GO:0140110	MF	transcription regulator activity			32/422	555/12028	0.00609417	0.565507	gene4693;gene10385;gene4965;gene3742;gene343;gene6436;gene2053;gene14895;gene18979;gene9224;gene7498;gene6640;gene18323;gene9948;gene9821;gene18365;gene16188;gene10560;gene8920;gene19547;gene16655;gene8380;gene7713;gene12815;gene5536;gene19337;gene14493;gene10307;gene10304;gene4580;gene20646;gene5871	EGR1;KLF6;JUN;ATF3;ARID5B;SOX9;FOSL2;NR4A2;RFX2;PASD1;ZBED1;JMJD6;TSC22D2;MYC;NFATC1;ATG101;NFKB1;KLF3;SMAD7;NAB2;FOXP4;BHLHE40;NR4A3;RXRG;MAFK;ETV4;BACH1;JDP2;FOS;CITED2;LOC106029507;ELOVL1
5	GO:0050730	BP	regulation of peptidyl-tyrosine phosphorylation			5/422	34/12028	0.00623791	0.569399	gene4021;gene17925;gene12205;gene16763;gene7321	ADRA2A;ERRFI1;SDC4;ITGB3;HGF
5	GO:0010594	BP	regulation of endothelial cell migration			5/422	34/12028	0.00623791	0.569399	gene15442;gene5716;gene14127;gene12661;gene19382	ANXA1;DNAJA4;BCAR1;HSPB1;STC1
24	GO:2000026	BP	regulation of multicellular organismal development			24/422	380/12028	0.00629539	0.569399	gene12268;gene12661;gene10690;gene13699;gene15442;gene12205;gene13559;gene18995;gene7321;gene1789;gene13515;gene5943;gene16576;gene4565;gene12509;gene16250;gene15519;gene3818;gene8127;gene10304;gene7400;gene4580;gene9522;gene17925	ACVR2A;HSPB1;GPC1;PHLDA2;ANXA1;SDC4;SPRY1;CSF1;HGF;AMIGO2;WNT11;CYR61;FAM101B;TNFAIP3;WNT2B;NTRK2;THBS2;THBS1;RGMA;FOS;ZSWIM6;CITED2;CSF3R;ERRFI1
7	GO:0050727	BP	regulation of inflammatory response			7/422	63/12028	0.00633466	0.569399	gene20213;gene16609;gene7321;gene4565;gene17581;gene2802;gene15442	IL1B;ADORA2B;HGF;TNFAIP3;TNFAIP6;LOC106030656;ANXA1
6	GO:0005539	MF	glycosaminoglycan binding			6/422	48/12028	0.0063463	0.569399	gene3818;gene17581;gene13809;gene19504;gene5943;gene1496	THBS1;TNFAIP6;VCAN;LOC106048966;CYR61;CD44
14	GO:0048870	BP	cell motility			14/422	184/12028	0.00671473	0.569399	gene20213;gene3937;gene16763;gene7321;gene4565;gene14127;gene16250;gene9522;gene15442;gene120;gene6346;gene12205;gene5943;gene13515	IL1B;ITGBL1;ITGB3;HGF;TNFAIP3;BCAR1;NTRK2;CSF3R;ANXA1;CH25H;FN1;SDC4;CYR61;WNT11
28	GO:0042221	BP	response to chemical			28/422	473/12028	0.00685393	0.569399	gene4693;gene13258;gene15176;gene4965;gene12027;gene15442;gene20084;gene6432;gene18979;gene15274;gene16763;gene7321;gene16443;gene14127;gene13108;gene17700;gene11109;gene20213;gene4973;gene4565;gene16336;gene3578;gene16250;gene6427;gene7316;gene4021;gene10304;gene4826	EGR1;CXCL1258;LOC106044180;JUN;HSPA5;ANXA1;COL2A1;SSTR2;RFX2;SLC2A5;ITGB3;HGF;B3GNT2;BCAR1;SLC25A24;HSP90AA1;HSPA8;IL1B;PRKAA2;TNFAIP3;CD9;HSPB8;NTRK2;CDC42EP4;GNAI1;ADRA2A;FOS;GFPT2
7	GO:2001233	BP	regulation of apoptotic signaling pathway			7/422	64/12028	0.00690384	0.569399	gene7321;gene12661;gene4565;gene9991;gene3742;gene12532;gene20084	HGF;HSPB1;TNFAIP3;DEPTOR;ATF3;G0S2;COL2A1
2	GO:0001759	BP	organ induction			2/422	4/12028	0.00703012	0.569399	gene12509;gene13559	WNT2B;SPRY1
2	GO:0043589	BP	skin morphogenesis			2/422	4/12028	0.00703012	0.569399	gene17925;gene13515	ERRFI1;WNT11
2	GO:0060412	BP	ventricular septum morphogenesis			2/422	4/12028	0.00703012	0.569399	gene4580;gene13515	CITED2;WNT11
2	GO:0006030	BP	chitin metabolic process			2/422	4/12028	0.00703012	0.569399	gene16641;gene16642	LOC106045866;LOC106045865
2	GO:1902723	BP	negative regulation of skeletal muscle satellite cell proliferation			2/422	4/12028	0.00703012	0.569399	gene10690;gene12205	GPC1;SDC4
2	GO:0014859	BP	negative regulation of skeletal muscle cell proliferation			2/422	4/12028	0.00703012	0.569399	gene10690;gene12205	GPC1;SDC4
2	GO:0090270	BP	regulation of fibroblast growth factor production			2/422	4/12028	0.00703012	0.569399	gene13515;gene12509	WNT11;WNT2B
2	GO:0099550	BP	trans-synaptic signaling, modulating synaptic transmission			2/422	4/12028	0.00703012	0.569399	gene13258;gene16250	CXCL1258;NTRK2
2	GO:0060638	BP	mesenchymal-epithelial cell signaling			2/422	4/12028	0.00703012	0.569399	gene7321;gene12509	HGF;WNT2B
2	GO:0035729	BP	cellular response to hepatocyte growth factor stimulus			2/422	4/12028	0.00703012	0.569399	gene14127;gene7321	BCAR1;HGF
2	GO:0035728	BP	response to hepatocyte growth factor			2/422	4/12028	0.00703012	0.569399	gene14127;gene7321	BCAR1;HGF
2	GO:0045110	BP	intermediate filament bundle assembly			2/422	4/12028	0.00703012	0.569399	gene19389;gene19388	NEFL;NEFM
2	GO:0046785	BP	microtubule polymerization			2/422	4/12028	0.00703012	0.569399	gene5153;gene13006	TPPP3;TPPP
2	GO:0005883	CC	neurofilament			2/422	4/12028	0.00703012	0.569399	gene19389;gene19388	NEFL;NEFM
3	GO:2001014	BP	regulation of skeletal muscle cell differentiation			3/422	12/12028	0.00744775	0.579766	gene12205;gene10690;gene7321	SDC4;GPC1;HGF
3	GO:2000243	BP	positive regulation of reproductive process			3/422	12/12028	0.00744775	0.579766	gene15176;gene11109;gene4580	LOC106044180;HSPA8;CITED2
3	GO:0019229	BP	regulation of vasoconstriction			3/422	12/12028	0.00744775	0.579766	gene4021;gene13258;gene6023	ADRA2A;CXCL1258;ARHGAP42
3	GO:0001578	BP	microtubule bundle formation			3/422	12/12028	0.00744775	0.579766	gene10048;gene13006;gene5153	CAPN6;TPPP;TPPP3
3	GO:2001237	BP	negative regulation of extrinsic apoptotic signaling pathway			3/422	12/12028	0.00744775	0.579766	gene4565;gene20084;gene7321	TNFAIP3;COL2A1;HGF
3	GO:0051928	BP	positive regulation of calcium ion transport			3/422	12/12028	0.00744775	0.579766	gene13258;gene8833;gene19382	CXCL1258;HSPA2;STC1
3	GO:0090303	BP	positive regulation of wound healing			3/422	12/12028	0.00744775	0.579766	gene4021;gene13258;gene15442	ADRA2A;CXCL1258;ANXA1
14	GO:0022603	BP	regulation of anatomical structure morphogenesis			14/422	189/12028	0.0078994	0.611527	gene7321;gene16763;gene12661;gene4565;gene16250;gene4580;gene12509;gene15442;gene7400;gene13515;gene6427;gene15519;gene13559;gene3818	HGF;ITGB3;HSPB1;TNFAIP3;NTRK2;CITED2;WNT2B;ANXA1;ZSWIM6;WNT11;CDC42EP4;THBS2;SPRY1;THBS1
13	GO:0051336	BP	regulation of hydrolase activity			13/422	168/12028	0.00863479	0.664784	gene13258;gene7321;gene760;gene15442;gene16250;gene13515;gene17415;gene6023;gene8833;gene19513;gene12205;gene5943;gene13559	CXCL1258;HGF;LOC106036374;ANXA1;NTRK2;WNT11;NDEL1;ARHGAP42;HSPA2;LOC106048983;SDC4;CYR61;SPRY1
4	GO:0030595	BP	leukocyte chemotaxis			4/422	24/12028	0.0090917	0.689722	gene15442;gene20213;gene120;gene9522	ANXA1;IL1B;CH25H;CSF3R
4	GO:0051087	MF	chaperone binding			4/422	24/12028	0.0090917	0.689722	gene2637;gene5716;gene16094;gene11109	BAG2;DNAJA4;BAG3;HSPA8
13	GO:0000981	MF	DNA-binding transcription factor activity, RNA polymerase II-specific			13/422	170/12028	0.00910638	0.689722	gene4693;gene10385;gene7498;gene10304;gene4965;gene9948;gene3742;gene18365;gene6436;gene14895;gene8380;gene10560;gene7713	EGR1;KLF6;ZBED1;FOS;JUN;MYC;ATF3;ATG101;SOX9;NR4A2;BHLHE40;KLF3;NR4A3
6	GO:0031668	BP	cellular response to extracellular stimulus			6/422	52/12028	0.00936635	0.699345	gene16609;gene11315;gene4973;gene10304;gene12509;gene3742	ADORA2B;RNF152;PRKAA2;FOS;WNT2B;ATF3
3	GO:0014066	BP	regulation of phosphatidylinositol 3-kinase signaling			3/422	13/12028	0.00943307	0.699345	gene13258;gene16250;gene7321	CXCL1258;NTRK2;HGF
3	GO:0035966	BP	response to topologically incorrect protein			3/422	13/12028	0.00943307	0.699345	gene12027;gene11109;gene3578	HSPA5;HSPA8;HSPB8
3	GO:1903036	BP	positive regulation of response to wounding			3/422	13/12028	0.00943307	0.699345	gene15442;gene13258;gene4021	ANXA1;CXCL1258;ADRA2A
5	GO:0006022	BP	aminoglycan metabolic process			5/422	38/12028	0.0100382	0.7318	gene16443;gene1404;gene16641;gene15435;gene16642	B3GNT2;CHST1;LOC106045866;TMEM2;LOC106045865
18	GO:0010648	BP	negative regulation of cell communication			18/422	267/12028	0.0100833	0.7318	gene4021;gene4693;gene11315;gene12661;gene7321;gene4973;gene4565;gene17925;gene9991;gene12027;gene3742;gene20213;gene6023;gene3089;gene20084;gene13559;gene7316;gene13515	ADRA2A;EGR1;RNF152;HSPB1;HGF;PRKAA2;TNFAIP3;ERRFI1;DEPTOR;HSPA5;ATF3;IL1B;ARHGAP42;LMO3;COL2A1;SPRY1;GNAI1;WNT11
18	GO:0023057	BP	negative regulation of signaling			18/422	267/12028	0.0100833	0.7318	gene4021;gene4693;gene11315;gene12661;gene7321;gene4973;gene4565;gene17925;gene9991;gene12027;gene3742;gene20213;gene6023;gene3089;gene20084;gene13559;gene7316;gene13515	ADRA2A;EGR1;RNF152;HSPB1;HGF;PRKAA2;TNFAIP3;ERRFI1;DEPTOR;HSPA5;ATF3;IL1B;ARHGAP42;LMO3;COL2A1;SPRY1;GNAI1;WNT11
9	GO:0031400	BP	negative regulation of protein modification process			9/422	103/12028	0.010132	0.7318	gene3742;gene7321;gene4973;gene4565;gene17925;gene9991;gene3089;gene2637;gene13559	ATF3;HGF;PRKAA2;TNFAIP3;ERRFI1;DEPTOR;LMO3;BAG2;SPRY1
14	GO:0009628	BP	response to abiotic stimulus			14/422	198/12028	0.010846	0.735004	gene20213;gene4693;gene5464;gene4965;gene12027;gene11338;gene5716;gene17700;gene15442;gene8833;gene8380;gene10304;gene11109;gene13515	IL1B;EGR1;DCUN1D3;JUN;HSPA5;NABP1;DNAJA4;HSP90AA1;ANXA1;HSPA2;BHLHE40;FOS;HSPA8;WNT11
5	GO:0034599	BP	cellular response to oxidative stress			5/422	39/12028	0.0111912	0.735004	gene15442;gene4973;gene10304;gene13108;gene4565	ANXA1;PRKAA2;FOS;SLC25A24;TNFAIP3
5	GO:0051348	BP	negative regulation of transferase activity			5/422	39/12028	0.0111912	0.735004	gene2637;gene17925;gene9991;gene4565;gene13559	BAG2;ERRFI1;DEPTOR;TNFAIP3;SPRY1
5	GO:0001818	BP	negative regulation of cytokine production			5/422	39/12028	0.0111912	0.735004	gene15442;gene4565;gene7321;gene2955;gene13515	ANXA1;TNFAIP3;HGF;TRIB2;WNT11
2	GO:0032653	BP	regulation of interleukin-10 production			2/422	5/12028	0.0114457	0.735004	gene2955;gene7321	TRIB2;HGF
2	GO:0061478	BP	response to platelet aggregation inhibitor			2/422	5/12028	0.0114457	0.735004	gene4973;gene7316	PRKAA2;GNAI1
2	GO:0032924	BP	activin receptor signaling pathway			2/422	5/12028	0.0114457	0.735004	gene12268;gene4580	ACVR2A;CITED2
2	GO:2000482	BP	regulation of interleukin-8 secretion			2/422	5/12028	0.0114457	0.735004	gene15442;gene13258	ANXA1;CXCL1258
2	GO:0033627	BP	cell adhesion mediated by integrin			2/422	5/12028	0.0114457	0.735004	gene3937;gene16763	ITGBL1;ITGB3
2	GO:0045986	BP	negative regulation of smooth muscle contraction			2/422	5/12028	0.0114457	0.735004	gene16609;gene6023	ADORA2B;ARHGAP42
2	GO:0030574	BP	collagen catabolic process			2/422	5/12028	0.0114457	0.735004	gene6009;gene6007	LOC106034204;LOC106034136
2	GO:0006047	BP	UDP-N-acetylglucosamine metabolic process			2/422	5/12028	0.0114457	0.735004	gene15045;gene4826	CAT5;GFPT2
2	GO:0070498	BP	interleukin-1-mediated signaling pathway			2/422	5/12028	0.0114457	0.735004	gene4693;gene8347	EGR1;IRAK2
2	GO:0009404	BP	toxin metabolic process			2/422	5/12028	0.0114457	0.735004	gene2666;gene7603	LOC106030436;LOC1060363743
2	GO:0048012	BP	hepatocyte growth factor receptor signaling pathway			2/422	5/12028	0.0114457	0.735004	gene14127;gene7321	BCAR1;HGF
2	GO:0003401	BP	axis elongation			2/422	5/12028	0.0114457	0.735004	gene6346;gene13559	FN1;SPRY1
2	GO:0015605	MF	organophosphate ester transmembrane transporter activity			2/422	5/12028	0.0114457	0.735004	gene9430;gene13108	MFSD2A;SLC25A24
2	GO:1990817	MF	RNA adenylyltransferase activity			2/422	5/12028	0.0114457	0.735004	gene14061;gene14060	LOC106043001;FAM46D
2	GO:0016653	MF	oxidoreductase activity, acting on NAD(P)H, heme protein as acceptor			2/422	5/12028	0.0114457	0.735004	gene5831;gene8732	LOC106033848;NDOR1
2	GO:0009374	MF	biotin binding			2/422	5/12028	0.0114457	0.735004	gene8070;gene8066	LOC106036308;LOC106036393
2	GO:0008061	MF	chitin binding			2/422	5/12028	0.0114457	0.735004	gene16641;gene16642	LOC106045866;LOC106045865
3	GO:0070373	BP	negative regulation of ERK1 and ERK2 cascade			3/422	14/12028	0.0116975	0.735004	gene3089;gene3742;gene13559	LMO3;ATF3;SPRY1
3	GO:0009225	BP	nucleotide-sugar metabolic process			3/422	14/12028	0.0116975	0.735004	gene16452;gene15045;gene4826	UGP2;CAT5;GFPT2
3	GO:0048641	BP	regulation of skeletal muscle tissue development			3/422	14/12028	0.0116975	0.735004	gene12205;gene10690;gene7321	SDC4;GPC1;HGF
3	GO:0006940	BP	regulation of smooth muscle contraction			3/422	14/12028	0.0116975	0.735004	gene4021;gene16609;gene6023	ADRA2A;ADORA2B;ARHGAP42
3	GO:0001102	MF	RNA polymerase II activating transcription factor binding			3/422	14/12028	0.0116975	0.735004	gene10304;gene8380;gene4580	FOS;BHLHE40;CITED2
8	GO:0009896	BP	positive regulation of catabolic process			8/422	88/12028	0.0119473	0.744036	gene4021;gene11315;gene2955;gene4973;gene4565;gene3578;gene7411;gene2637	ADRA2A;RNF152;TRIB2;PRKAA2;TNFAIP3;HSPB8;RNF180;BAG2
7	GO:0004713	MF	protein tyrosine kinase activity			7/422	71/12028	0.0120042	0.744036	gene17105;gene15062;gene16484;gene19317;gene15359;gene16250;gene12197	SLA;ABL1;MATK;MST1R;FGFR1;NTRK2;SRC
4	GO:0032675	BP	regulation of interleukin-6 production			4/422	26/12028	0.0121068	0.744036	gene16609;gene13258;gene7321;gene4565	ADORA2B;CXCL1258;HGF;TNFAIP3
4	GO:0007179	BP	transforming growth factor beta receptor signaling pathway			4/422	26/12028	0.0121068	0.744036	gene8920;gene10304;gene12268;gene4580	SMAD7;FOS;ACVR2A;CITED2
4	GO:0061041	BP	regulation of wound healing			4/422	26/12028	0.0121068	0.744036	gene15442;gene13258;gene16336;gene4021	ANXA1;CXCL1258;CD9;ADRA2A
6	GO:0062023	CC	collagen-containing extracellular matrix			6/422	55/12028	0.0122201	0.74772	gene8680;gene16636;gene10690;gene6346;gene3860;gene20084	TNC;PRELP;GPC1;FN1;COCH;COL2A1
61	GO:0007165	BP	signal transduction			61/422	1279/12028	0.0124768	0.760106	gene17479;gene4693;gene12268;gene601;gene12661;gene15614;gene17471;gene9991;gene1827;gene16880;gene4102;gene12027;gene3742;gene7410;gene15442;gene14442;gene2150;gene6432;gene13515;gene16609;gene19547;gene16763;gene7321;gene18243;gene11164;gene20451;gene14127;gene132;gene8920;gene17723;gene16188;gene8116;gene4965;gene15278;gene20213;gene7391;gene13212;gene4973;gene978;gene12509;gene16250;gene62;ge…	GCGR;EGR1;ACVR2A;EVC2;HSPB1;LOC106044678;SOCS3;DEPTOR;LOC106047885;LOC106046116;PLD1;HSPA5;ATF3;HTR1A;ANXA1;RCAN1;ITGB6;SSTR2;WNT11;ADORA2B;NAB2;ITGB3;HGF;FGF12;DIXDC1;RHOD;BCAR1;CXCL12;SMAD7;LOC106047082;NFKB1;AKAP13;JUN;SPSB1;IL1B;PDE4D;CXCL1212;PRKAA2;CBLB;WNT2B;NTRK2;LOC106037870;G0S2;CDC42EP4;GABRE;TP53I114;GNAI1;ADRA2A;ITGBL1;RGMA;MST1R;FOS;CD36;CITED2;ADGRF5;PTAFR;LOC106049872;ARHGAP42;ADA…
12	GO:0007154	BP	cell communication			12/422	157/12028	0.0128173	0.777471	gene16609;gene13258;gene11315;gene7321;gene4973;gene10304;gene12509;gene18243;gene16250;gene3742;gene7410;gene12185	ADORA2B;CXCL1258;RNF152;HGF;PRKAA2;FOS;WNT2B;FGF12;NTRK2;ATF3;HTR1A;RIC3
7	GO:0001933	BP	negative regulation of protein phosphorylation			7/422	72/12028	0.0129087	0.779641	gene3742;gene7321;gene4565;gene17925;gene9991;gene3089;gene13559	ATF3;HGF;TNFAIP3;ERRFI1;DEPTOR;LMO3;SPRY1
20	GO:0005615	CC	extracellular space			20/422	324/12028	0.0134042	0.799363	gene20213;gene12290;gene913;gene18995;gene7321;gene19382;gene1718;gene11981;gene15176;gene12509;gene3818;gene6346;gene15442;gene12291;gene6007;gene6009;gene760;gene13515;gene20084;gene19513	IL1B;LOC106041041;F5;CSF1;HGF;STC1;CPM;PHF19;LOC106044180;WNT2B;THBS1;FN1;ANXA1;LOC106041042;LOC106034136;LOC106034204;LOC106036374;WNT11;COL2A1;LOC106048983
20	GO:0045595	BP	regulation of cell differentiation			20/422	327/12028	0.0141848	0.799363	gene7400;gene12268;gene16763;gene7321;gene8127;gene10304;gene10690;gene4965;gene16576;gene12509;gene9522;gene16250;gene3089;gene4789;gene15442;gene18995;gene12205;gene17925;gene5943;gene2955	ZSWIM6;ACVR2A;ITGB3;HGF;RGMA;FOS;GPC1;JUN;FAM101B;WNT2B;CSF3R;NTRK2;LMO3;CXCL14;ANXA1;CSF1;SDC4;ERRFI1;CYR61;TRIB2
3	GO:0060411	BP	cardiac septum morphogenesis			3/422	15/12028	0.0142473	0.799363	gene5943;gene4580;gene13515	CYR61;CITED2;WNT11
3	GO:0061077	BP	chaperone-mediated protein folding			3/422	15/12028	0.0142473	0.799363	gene12027;gene11109;gene12661	HSPA5;HSPA8;HSPB1
3	GO:0071277	BP	cellular response to calcium ion			3/422	15/12028	0.0142473	0.799363	gene4973;gene10304;gene13108	PRKAA2;FOS;SLC25A24
3	GO:0001816	BP	cytokine production			3/422	15/12028	0.0142473	0.799363	gene20213;gene13515;gene12509	IL1B;WNT11;WNT2B
3	GO:0045639	BP	positive regulation of myeloid cell differentiation			3/422	15/12028	0.0142473	0.799363	gene10304;gene12268;gene18995	FOS;ACVR2A;CSF1
3	GO:0007417	BP	central nervous system development			3/422	15/12028	0.0142473	0.799363	gene20084;gene13809;gene4580	COL2A1;VCAN;CITED2
6	GO:0043087	BP	regulation of GTPase activity			6/422	57/12028	0.0144318	0.799363	gene13258;gene16250;gene6023;gene13559;gene12205;gene13515	CXCL1258;NTRK2;ARHGAP42;SPRY1;SDC4;WNT11
97	GO:0005515	MF	protein binding			97/422	2214/12028	0.015098	0.799363	gene18995;gene4796;gene4965;gene7411;gene7410;gene7498;gene5780;gene15176;gene15278;gene548;gene11109;gene13258;gene16576;gene4973;gene17105;gene1932;gene8380;gene14015;gene12081;gene10304;gene12268;gene12788;gene12661;gene5153;gene3742;gene15394;gene20084;gene9224;gene16763;gene2955;gene19641;gene978;gene10022;gene16022;gene1854;gene4021;gene16452;gene7530;gene5896;gene5895;gene18351;gene576;gen…	CSF1;TGFBI;JUN;RNF180;HTR1A;ZBED1;BDNF;LOC106044180;SPSB1;TNIP2;HSPA8;CXCL1258;FAM101B;PRKAA2;SLA;KIF26B;BHLHE40;MAP1B;EEF1A2;FOS;ACVR2A;LOC106041570;HSPB1;TPPP3;ATF3;LZTS1;COL2A1;PASD1;ITGB3;TRIB2;LOC106049124;CBLB;LOC106038521;LOC106045127;MAP10;ADRA2A;UGP2;HSP90B1;GIPC2;DNAJB4;GPD1;ACOX3;EGR1;RNF152;LOC106041089;BAG2;SSTR2;ADAM8;HGF;DNAJB5;BCAR1;MYC;TPPP;CYR61;PDLIM3;LOC106041041;LOC106041042;…
46	GO:0048583	BP	regulation of response to stimulus			46/422	926/12028	0.015404	0.799363	gene4693;gene11315;gene12661;gene13258;gene9991;gene10690;gene13699;gene5505;gene12027;gene12268;gene15442;gene20084;gene13515;gene16609;gene7321;gene13559;gene17581;gene14127;gene19011;gene3860;gene8116;gene19641;gene5943;gene9519;gene20213;gene4789;gene4973;gene4565;gene16336;gene12509;gene16250;gene3089;gene2802;gene7316;gene4021;gene3742;gene8127;gene17925;gene7400;gene4580;gene14442;gene2036…	EGR1;RNF152;HSPB1;CXCL1258;DEPTOR;GPC1;PHLDA2;BAIAP2L1;HSPA5;ACVR2A;ANXA1;COL2A1;WNT11;ADORA2B;HGF;SPRY1;TNFAIP6;BCAR1;KCNA2;COCH;AKAP13;LOC106049124;CYR61;STK40;IL1B;CXCL14;PRKAA2;TNFAIP3;CD9;WNT2B;NTRK2;LMO3;LOC106030656;GNAI1;ADRA2A;ATF3;RGMA;ERRFI1;ZSWIM6;CITED2;RCAN1;LOC106049872;ARHGAP42;G0S2;IRAK2;LOC106041580
4	GO:0008643	BP	carbohydrate transport			4/422	28/12028	0.0156959	0.799363	gene15274;gene16496;gene19453;gene9430	SLC2A5;MFSD12;GCK;MFSD2A
4	GO:2001234	BP	negative regulation of apoptotic signaling pathway			4/422	28/12028	0.0156959	0.799363	gene4565;gene20084;gene7321;gene12661	TNFAIP3;COL2A1;HGF;HSPB1
4	GO:1903364	BP	positive regulation of cellular protein catabolic process			4/422	28/12028	0.0156959	0.799363	gene2637;gene7411;gene2955;gene4565	BAG2;RNF180;TRIB2;TNFAIP3
7	GO:0006979	BP	response to oxidative stress			7/422	75/12028	0.0159152	0.799363	gene4973;gene4565;gene10304;gene14442;gene1504;gene15442;gene13108	PRKAA2;TNFAIP3;FOS;RCAN1;CAT;ANXA1;SLC25A24
2	GO:0007176	BP	regulation of epidermal growth factor-activated receptor activity			2/422	6/12028	0.0167723	0.799363	gene4021;gene17925	ADRA2A;ERRFI1
2	GO:0032731	BP	positive regulation of interleukin-1 beta production			2/422	6/12028	0.0167723	0.799363	gene4693;gene12661	EGR1;HSPB1
2	GO:0032715	BP	negative regulation of interleukin-6 production			2/422	6/12028	0.0167723	0.799363	gene4565;gene7321	TNFAIP3;HGF
2	GO:0098801	BP	regulation of renal system process			2/422	6/12028	0.0167723	0.799363	gene13258;gene19382	CXCL1258;STC1
2	GO:2000403	BP	positive regulation of lymphocyte migration			2/422	6/12028	0.0167723	0.799363	gene16763;gene4789	ITGB3;CXCL14
2	GO:0033688	BP	regulation of osteoblast proliferation			2/422	6/12028	0.0167723	0.799363	gene16763;gene5943	ITGB3;CYR61
2	GO:0048016	BP	inositol phosphate-mediated signaling			2/422	6/12028	0.0167723	0.799363	gene14442;gene1827	RCAN1;LOC106047885
2	GO:0070569	MF	uridylyltransferase activity			2/422	6/12028	0.0167723	0.799363	gene12760;gene16452	UAP1;UGP2
2	GO:0005080	MF	protein kinase C binding			2/422	6/12028	0.0167723	0.799363	gene16763;gene12661	ITGB3;HSPB1
2	GO:0015149	MF	hexose transmembrane transporter activity			2/422	6/12028	0.0167723	0.799363	gene15274;gene18680	SLC2A5;LOC106048089
3	GO:0042035	BP	regulation of cytokine biosynthetic process			3/422	16/12028	0.0170867	0.799363	gene4693;gene2955;gene12661	EGR1;TRIB2;HSPB1
3	GO:0003073	BP	regulation of systemic arterial blood pressure			3/422	16/12028	0.0170867	0.799363	gene13258;gene12651;gene15274	CXCL1258;RASL10B;SLC2A5
3	GO:0008088	BP	axo-dendritic transport			3/422	16/12028	0.0170867	0.799363	gene19389;gene11109;gene12661	NEFL;HSPA8;HSPB1
4	GO:1903708	BP	positive regulation of hemopoiesis			4/422	29/12028	0.0177157	0.799363	gene15442;gene10304;gene12268;gene18995	ANXA1;FOS;ACVR2A;CSF1
4	GO:0010212	BP	response to ionizing radiation			4/422	29/12028	0.0177157	0.799363	gene15442;gene4693;gene5464;gene11338	ANXA1;EGR1;DCUN1D3;NABP1
6	GO:0050839	MF	cell adhesion molecule binding			6/422	60/12028	0.018249	0.799363	gene3937;gene16763;gene4796;gene16336;gene2150;gene5943	ITGBL1;ITGB3;TGFBI;CD9;ITGB6;CYR61
7	GO:0042326	BP	negative regulation of phosphorylation			7/422	78/12028	0.0193876	0.799363	gene3742;gene7321;gene4565;gene17925;gene9991;gene3089;gene13559	ATF3;HGF;TNFAIP3;ERRFI1;DEPTOR;LMO3;SPRY1
8	GO:0033993	BP	response to lipid			8/422	96/12028	0.0193913	0.799363	gene20213;gene13258;gene4973;gene15176;gene4965;gene15442;gene7316;gene6432	IL1B;CXCL1258;PRKAA2;LOC106044180;JUN;ANXA1;GNAI1;SSTR2
9	GO:0048731	BP	system development			9/422	115/12028	0.019731	0.799363	gene12268;gene13809;gene17925;gene4580;gene14015;gene16250;gene20084;gene10304;gene17415	ACVR2A;VCAN;ERRFI1;CITED2;MAP1B;NTRK2;COL2A1;FOS;NDEL1
9	GO:1902532	BP	negative regulation of intracellular signal transduction			9/422	115/12028	0.019731	0.799363	gene11315;gene3742;gene12661;gene4973;gene4565;gene9991;gene3089;gene6023;gene13559	RNF152;ATF3;HSPB1;PRKAA2;TNFAIP3;DEPTOR;LMO3;ARHGAP42;SPRY1
4	GO:0000302	BP	response to reactive oxygen species			4/422	30/12028	0.01989	0.799363	gene15442;gene4973;gene10304;gene4565	ANXA1;PRKAA2;FOS;TNFAIP3
4	GO:0002792	BP	negative regulation of peptide secretion			4/422	30/12028	0.01989	0.799363	gene15442;gene13258;gene4021;gene4565	ANXA1;CXCL1258;ADRA2A;TNFAIP3
4	GO:0050709	BP	negative regulation of protein secretion			4/422	30/12028	0.01989	0.799363	gene15442;gene13258;gene4021;gene4565	ANXA1;CXCL1258;ADRA2A;TNFAIP3
4	GO:0004715	MF	non-membrane spanning protein tyrosine kinase activity			4/422	30/12028	0.01989	0.799363	gene17105;gene12197;gene15062;gene16484	SLA;SRC;ABL1;MATK
5	GO:0010632	BP	regulation of epithelial cell migration			5/422	45/12028	0.0200304	0.799363	gene15442;gene5716;gene14127;gene12661;gene19382	ANXA1;DNAJA4;BCAR1;HSPB1;STC1
5	GO:0032870	BP	cellular response to hormone stimulus			5/422	45/12028	0.0200304	0.799363	gene15442;gene4973;gene4021;gene4965;gene6432	ANXA1;PRKAA2;ADRA2A;JUN;SSTR2
5	GO:0045732	BP	positive regulation of protein catabolic process			5/422	45/12028	0.0200304	0.799363	gene4021;gene2637;gene7411;gene2955;gene4565	ADRA2A;BAG2;RNF180;TRIB2;TNFAIP3
3	GO:0045104	BP	intermediate filament cytoskeleton organization			3/422	17/12028	0.0202185	0.799363	gene19389;gene19388;gene17415	NEFL;NEFM;NDEL1
3	GO:0045103	BP	intermediate filament-based process			3/422	17/12028	0.0202185	0.799363	gene19389;gene19388;gene17415	NEFL;NEFM;NDEL1
3	GO:0008406	BP	gonad development			3/422	17/12028	0.0202185	0.799363	gene16525;gene4580;gene12509	AMH;CITED2;WNT2B
16	GO:0051094	BP	positive regulation of developmental process			16/422	246/12028	0.020344	0.799363	gene12268;gene18995;gene12661;gene4565;gene10304;gene10690;gene4965;gene4580;gene12509;gene16250;gene3089;gene15442;gene1789;gene13559;gene5943;gene16763	ACVR2A;CSF1;HSPB1;TNFAIP3;FOS;GPC1;JUN;CITED2;WNT2B;NTRK2;LMO3;ANXA1;AMIGO2;SPRY1;CYR61;ITGB3
7	GO:0009725	BP	response to hormone			7/422	79/12028	0.0206542	0.799363	gene4021;gene4693;gene4973;gene15176;gene4965;gene15442;gene6432	ADRA2A;EGR1;PRKAA2;LOC106044180;JUN;ANXA1;SSTR2
9	GO:0030162	BP	regulation of proteolysis			9/422	116/12028	0.0207538	0.799363	gene4021;gene13258;gene2955;gene7321;gene760;gene7411;gene2637;gene5943;gene19513	ADRA2A;CXCL1258;TRIB2;HGF;LOC106036374;RNF180;BAG2;CYR61;LOC106048983
11	GO:0009719	BP	response to endogenous stimulus			11/422	150/12028	0.021114	0.799363	gene4021;gene4693;gene16763;gene4973;gene16336;gene15176;gene4965;gene16250;gene15442;gene20084;gene6432	ADRA2A;EGR1;ITGB3;PRKAA2;CD9;LOC106044180;JUN;NTRK2;ANXA1;COL2A1;SSTR2
22	GO:0050790	BP	regulation of catalytic activity			22/422	376/12028	0.0211352	0.799363	gene12268;gene9991;gene15442;gene2637;gene12205;gene13515;gene16609;gene16763;gene7321;gene13559;gene5943;gene13258;gene4565;gene760;gene16250;gene4021;gene17925;gene12081;gene6023;gene8833;gene17415;gene19513	ACVR2A;DEPTOR;ANXA1;BAG2;SDC4;WNT11;ADORA2B;ITGB3;HGF;SPRY1;CYR61;CXCL1258;TNFAIP3;LOC106036374;NTRK2;ADRA2A;ERRFI1;EEF1A2;ARHGAP42;HSPA2;NDEL1;LOC106048983
6	GO:0045862	BP	positive regulation of proteolysis			6/422	62/12028	0.0211464	0.799363	gene4021;gene13258;gene2955;gene7411;gene2637;gene5943	ADRA2A;CXCL1258;TRIB2;RNF180;BAG2;CYR61
18	GO:0042127	BP	regulation of cell population proliferation			18/422	291/12028	0.0218322	0.799363	gene13258;gene17105;gene16763;gene7321;gene8680;gene16639;gene16336;gene10690;gene15359;gene13699;gene9948;gene16250;gene4565;gene15442;gene13559;gene12205;gene5943;gene13515	CXCL1258;SLA;ITGB3;HGF;TNC;BTG2;CD9;GPC1;FGFR1;PHLDA2;MYC;NTRK2;TNFAIP3;ANXA1;SPRY1;SDC4;CYR61;WNT11
16	GO:0009968	BP	negative regulation of signal transduction			16/422	251/12028	0.0218759	0.799363	gene20213;gene4693;gene11315;gene12661;gene7321;gene4973;gene4565;gene17925;gene9991;gene12027;gene3742;gene6023;gene3089;gene20084;gene13559;gene13515	IL1B;EGR1;RNF152;HSPB1;HGF;PRKAA2;TNFAIP3;ERRFI1;DEPTOR;HSPA5;ATF3;ARHGAP42;LMO3;COL2A1;SPRY1;WNT11
4	GO:0006469	BP	negative regulation of protein kinase activity			4/422	31/12028	0.0222217	0.799363	gene4565;gene17925;gene9991;gene13559	TNFAIP3;ERRFI1;DEPTOR;SPRY1
2	GO:0045932	BP	negative regulation of muscle contraction			2/422	7/12028	0.0229409	0.799363	gene16609;gene6023	ADORA2B;ARHGAP42
2	GO:0008645	BP	hexose transmembrane transport			2/422	7/12028	0.0229409	0.799363	gene15274;gene19453	SLC2A5;GCK
2	GO:0045109	BP	intermediate filament organization			2/422	7/12028	0.0229409	0.799363	gene19389;gene19388	NEFL;NEFM
2	GO:1901160	BP	primary amino compound metabolic process			2/422	7/12028	0.0229409	0.799363	gene7411;gene7410	RNF180;HTR1A
2	GO:0017001	BP	antibiotic catabolic process			2/422	7/12028	0.0229409	0.799363	gene1504;gene6855	CAT;HTR2A
2	GO:0061098	BP	positive regulation of protein tyrosine kinase activity			2/422	7/12028	0.0229409	0.799363	gene4021;gene12205	ADRA2A;SDC4
2	GO:0051085	BP	chaperone cofactor-dependent protein refolding			2/422	7/12028	0.0229409	0.799363	gene12027;gene11109	HSPA5;HSPA8
2	GO:0042428	BP	serotonin metabolic process			2/422	7/12028	0.0229409	0.799363	gene7411;gene7410	RNF180;HTR1A
2	GO:0007044	BP	cell-substrate junction assembly			2/422	7/12028	0.0229409	0.799363	gene6346;gene16763	FN1;ITGB3
2	GO:0031128	BP	developmental induction			2/422	7/12028	0.0229409	0.799363	gene13559;gene12509	SPRY1;WNT2B
2	GO:0051787	MF	misfolded protein binding			2/422	7/12028	0.0229409	0.799363	gene12027;gene11109	HSPA5;HSPA8
2	GO:0015245	MF	fatty acid transmembrane transporter activity			2/422	7/12028	0.0229409	0.799363	gene9430;gene10624	MFSD2A;SLCO2A1
2	GO:0004908	MF	interleukin-1 receptor activity			2/422	7/12028	0.0229409	0.799363	gene18252;gene12857	IL1RAP;LOC106041672
2	GO:0043621	MF	protein self-association			2/422	7/12028	0.0229409	0.799363	gene4565;gene12268	TNFAIP3;ACVR2A
7	GO:0007267	BP	cell-cell signaling			7/422	81/12028	0.0233581	0.799363	gene13258;gene7321;gene18243;gene12509;gene16250;gene7410;gene12185	CXCL1258;HGF;FGF12;WNT2B;NTRK2;HTR1A;RIC3
3	GO:0019897	CC	extrinsic component of plasma membrane			3/422	18/12028	0.0236441	0.799363	gene15442;gene17925;gene12747	ANXA1;ERRFI1;LOC106041580
3	GO:0004879	MF	nuclear receptor activity			3/422	18/12028	0.0236441	0.799363	gene18365;gene7713;gene14895	ATG101;NR4A3;NR4A2
3	GO:0098531	MF	ligand-activated transcription factor activity			3/422	18/12028	0.0236441	0.799363	gene18365;gene7713;gene14895	ATG101;NR4A3;NR4A2
4	GO:0050900	BP	leukocyte migration			4/422	32/12028	0.0247133	0.799363	gene15442;gene20213;gene120;gene9522	ANXA1;IL1B;CH25H;CSF3R
4	GO:0060429	BP	epithelium development			4/422	32/12028	0.0247133	0.799363	gene20084;gene13559;gene17925;gene13515	COL2A1;SPRY1;ERRFI1;WNT11
3	GO:0032922	BP	circadian regulation of gene expression			3/422	19/12028	0.0273635	0.799363	gene8380;gene4693;gene12216	BHLHE40;EGR1;NOCT
4	GO:0043547	BP	positive regulation of GTPase activity			4/422	33/12028	0.0273668	0.799363	gene6023;gene13258;gene12205;gene13515	ARHGAP42;CXCL1258;SDC4;WNT11
4	GO:0033673	BP	negative regulation of kinase activity			4/422	33/12028	0.0273668	0.799363	gene4565;gene17925;gene9991;gene13559	TNFAIP3;ERRFI1;DEPTOR;SPRY1
6	GO:0006954	BP	inflammatory response			6/422	66/12028	0.0278414	0.799363	gene20213;gene11543;gene3818;gene20364;gene15442;gene8347	IL1B;TNFRSF1B;THBS1;LOC106049872;ANXA1;IRAK2
40	GO:0023051	BP	regulation of signaling			40/422	805/12028	0.0283647	0.799363	gene4693;gene11315;gene12661;gene13258;gene9991;gene10690;gene13699;gene5505;gene12027;gene12268;gene7410;gene15442;gene20084;gene13515;gene16609;gene7321;gene18243;gene13559;gene8116;gene19641;gene5943;gene9519;gene20213;gene12651;gene4973;gene4565;gene978;gene12509;gene16250;gene3089;gene7316;gene4021;gene17925;gene4580;gene14442;gene3742;gene6023;gene12532;gene8347;gene12747	EGR1;RNF152;HSPB1;CXCL1258;DEPTOR;GPC1;PHLDA2;BAIAP2L1;HSPA5;ACVR2A;HTR1A;ANXA1;COL2A1;WNT11;ADORA2B;HGF;FGF12;SPRY1;AKAP13;LOC106049124;CYR61;STK40;IL1B;RASL10B;PRKAA2;TNFAIP3;CBLB;WNT2B;NTRK2;LMO3;GNAI1;ADRA2A;ERRFI1;CITED2;RCAN1;ATF3;ARHGAP42;G0S2;IRAK2;LOC106041580
6	GO:0048589	BP	developmental growth			6/422	67/12028	0.0297105	0.799363	gene12594;gene16250;gene1932;gene6346;gene13559;gene9519	ETNK2;NTRK2;KIF26B;FN1;SPRY1;STK40
6	GO:0008514	MF	organic anion transmembrane transporter activity			6/422	67/12028	0.0297105	0.799363	gene17501;gene9430;gene14760;gene3210;gene13108;gene10624	SLC16A3;MFSD2A;SLCO4C1;LOC106031011;SLC25A24;SLCO2A1
2	GO:0003151	BP	outflow tract morphogenesis			2/422	8/12028	0.0298862	0.799363	gene4580;gene13515	CITED2;WNT11
2	GO:1901071	BP	glucosamine-containing compound metabolic process			2/422	8/12028	0.0298862	0.799363	gene16641;gene16642	LOC106045866;LOC106045865
2	GO:1903202	BP	negative regulation of oxidative stress-induced cell death			2/422	8/12028	0.0298862	0.799363	gene12661;gene7321	HSPB1;HGF
2	GO:1904427	BP	positive regulation of calcium ion transmembrane transport			2/422	8/12028	0.0298862	0.799363	gene13258;gene8833	CXCL1258;HSPA2
2	GO:0032732	BP	positive regulation of interleukin-1 production			2/422	8/12028	0.0298862	0.799363	gene4693;gene12661	EGR1;HSPB1
2	GO:0048008	BP	platelet-derived growth factor receptor signaling pathway			2/422	8/12028	0.0298862	0.799363	gene16763;gene14127	ITGB3;BCAR1
2	GO:0002931	BP	response to ischemia			2/422	8/12028	0.0298862	0.799363	gene4693;gene14442	EGR1;RCAN1
2	GO:0060485	BP	mesenchyme development			2/422	8/12028	0.0298862	0.799363	gene4580;gene13515	CITED2;WNT11
2	GO:1900408	BP	negative regulation of cellular response to oxidative stress			2/422	8/12028	0.0298862	0.799363	gene12661;gene7321	HSPB1;HGF
2	GO:0015749	BP	monosaccharide transmembrane transport			2/422	8/12028	0.0298862	0.799363	gene15274;gene19453	SLC2A5;GCK
2	GO:0015807	BP	L-amino acid transport			2/422	8/12028	0.0298862	0.799363	gene18999;gene9036	SLC6A17;SLC7A3
2	GO:0032355	BP	response to estradiol			2/422	8/12028	0.0298862	0.799363	gene15442;gene6432	ANXA1;SSTR2
2	GO:0032722	BP	positive regulation of chemokine production			2/422	8/12028	0.0298862	0.799363	gene16609;gene4693	ADORA2B;EGR1
2	GO:0048844	BP	artery morphogenesis			2/422	8/12028	0.0298862	0.799363	gene4580;gene13515	CITED2;WNT11
2	GO:0051084	BP	'de novo' posttranslational protein folding			2/422	8/12028	0.0298862	0.799363	gene12027;gene11109	HSPA5;HSPA8
2	GO:0034219	BP	carbohydrate transmembrane transport			2/422	8/12028	0.0298862	0.799363	gene15274;gene19453	SLC2A5;GCK
2	GO:0006458	BP	'de novo' protein folding			2/422	8/12028	0.0298862	0.799363	gene12027;gene11109	HSPA5;HSPA8
2	GO:0043679	CC	axon terminus			2/422	8/12028	0.0298862	0.799363	gene16250;gene19011	NTRK2;KCNA2
2	GO:0015280	MF	ligand-gated sodium channel activity			2/422	8/12028	0.0298862	0.799363	gene17596;gene18496	LOC106046904;SCNN1A
2	GO:0015145	MF	monosaccharide transmembrane transporter activity			2/422	8/12028	0.0298862	0.799363	gene15274;gene18680	SLC2A5;LOC106048089
2	GO:0070530	MF	K63-linked polyubiquitin modification-dependent protein binding			2/422	8/12028	0.0298862	0.799363	gene4565;gene548	TNFAIP3;TNIP2
2	GO:0051119	MF	sugar transmembrane transporter activity			2/422	8/12028	0.0298862	0.799363	gene15274;gene18680	SLC2A5;LOC106048089
4	GO:0002685	BP	regulation of leukocyte migration			4/422	34/12028	0.030184	0.799363	gene15442;gene16336;gene16763;gene4789	ANXA1;CD9;ITGB3;CXCL14
4	GO:0031072	MF	heat shock protein binding			4/422	34/12028	0.030184	0.799363	gene2637;gene12027;gene5716;gene11109	BAG2;HSPA5;DNAJA4;HSPA8
23	GO:0051172	BP	negative regulation of nitrogen compound metabolic process			23/422	419/12028	0.0302504	0.799363	gene4693;gene16522;gene9991;gene4965;gene4361;gene2637;gene13515;gene7321;gene9948;gene19547;gene13559;gene10560;gene4973;gene4565;gene760;gene3089;gene16022;gene2955;gene17925;gene3742;gene11109;gene7683;gene19513	EGR1;DOT1L;DEPTOR;JUN;RBM46;BAG2;WNT11;HGF;MYC;NAB2;SPRY1;KLF3;PRKAA2;TNFAIP3;LOC106036374;LMO3;LOC106045127;TRIB2;ERRFI1;ATF3;HSPA8;LOC106035954;LOC106048983
3	GO:1905330	BP	regulation of morphogenesis of an epithelium			3/422	20/12028	0.0313753	0.799363	gene13515;gene7321;gene12509	WNT11;HGF;WNT2B
3	GO:0050731	BP	positive regulation of peptidyl-tyrosine phosphorylation			3/422	20/12028	0.0313753	0.799363	gene4021;gene12205;gene7321	ADRA2A;SDC4;HGF
3	GO:0050866	BP	negative regulation of cell activation			3/422	20/12028	0.0313753	0.799363	gene15442;gene4565;gene16336	ANXA1;TNFAIP3;CD9
3	GO:0010595	BP	positive regulation of endothelial cell migration			3/422	20/12028	0.0313753	0.799363	gene15442;gene14127;gene12661	ANXA1;BCAR1;HSPB1
11	GO:0051093	BP	negative regulation of developmental process			11/422	163/12028	0.0314284	0.799363	gene7321;gene16576;gene2955;gene8127;gene4789;gene10690;gene12509;gene15442;gene15519;gene12205;gene3818	HGF;FAM101B;TRIB2;RGMA;CXCL14;GPC1;WNT2B;ANXA1;THBS2;SDC4;THBS1
6	GO:0040007	BP	growth			6/422	68/12028	0.03166	0.799363	gene12594;gene16250;gene1932;gene6346;gene13559;gene9519	ETNK2;NTRK2;KIF26B;FN1;SPRY1;STK40
19	GO:0006928	BP	movement of cell or subcellular component			19/422	329/12028	0.0318994	0.799363	gene20213;gene3937;gene12661;gene7321;gene19389;gene4565;gene15442;gene16443;gene14127;gene9522;gene16250;gene5943;gene1932;gene120;gene6346;gene13515;gene12205;gene11109;gene16763	IL1B;ITGBL1;HSPB1;HGF;NEFL;TNFAIP3;ANXA1;B3GNT2;BCAR1;CSF3R;NTRK2;CYR61;KIF26B;CH25H;FN1;WNT11;SDC4;HSPA8;ITGB3
5	GO:0070372	BP	regulation of ERK1 and ERK2 cascade			5/422	51/12028	0.0325186	0.799363	gene13258;gene3089;gene3742;gene5943;gene13559	CXCL1258;LMO3;ATF3;CYR61;SPRY1
7	GO:0034097	BP	response to cytokine			7/422	87/12028	0.032909	0.799363	gene18979;gene4693;gene16443;gene4965;gene4826;gene15442;gene6427	RFX2;EGR1;B3GNT2;JUN;GFPT2;ANXA1;CDC42EP4
4	GO:0043270	BP	positive regulation of ion transport			4/422	35/12028	0.0331662	0.799363	gene18243;gene13258;gene8833;gene19382	FGF12;CXCL1258;HSPA2;STC1
12	GO:0002684	BP	positive regulation of immune system process			12/422	176/12028	0.0345983	0.799363	gene16609;gene20213;gene12268;gene16763;gene18995;gene10304;gene14127;gene15442;gene20364;gene4789;gene3860;gene8347	ADORA2B;IL1B;ACVR2A;ITGB3;CSF1;FOS;BCAR1;ANXA1;LOC106049872;CXCL14;COCH;IRAK2
35	GO:0009966	BP	regulation of signal transduction			35/422	705/12028	0.034683	0.799363	gene4693;gene11315;gene12661;gene13258;gene9991;gene10690;gene13699;gene12027;gene12268;gene5505;gene20084;gene13515;gene16609;gene7321;gene13559;gene8116;gene19641;gene5943;gene9519;gene20213;gene4973;gene4565;gene12509;gene16250;gene3089;gene7316;gene4021;gene17925;gene4580;gene14442;gene3742;gene6023;gene12532;gene8347;gene12747	EGR1;RNF152;HSPB1;CXCL1258;DEPTOR;GPC1;PHLDA2;HSPA5;ACVR2A;BAIAP2L1;COL2A1;WNT11;ADORA2B;HGF;SPRY1;AKAP13;LOC106049124;CYR61;STK40;IL1B;PRKAA2;TNFAIP3;WNT2B;NTRK2;LMO3;GNAI1;ADRA2A;ERRFI1;CITED2;RCAN1;ATF3;ARHGAP42;G0S2;IRAK2;LOC106041580
5	GO:0051346	BP	negative regulation of hydrolase activity			5/422	52/12028	0.0349816	0.799363	gene15442;gene19513;gene760;gene7321;gene13559	ANXA1;LOC106048983;LOC106036374;HGF;SPRY1
5	GO:0033267	CC	axon part			5/422	52/12028	0.0349816	0.799363	gene19389;gene16250;gene19011;gene11109;gene12661	NEFL;NTRK2;KCNA2;HSPA8;HSPB1
1	GO:0030850	BP	prostate gland development			1/422	1/12028	0.0350848	0.799363	gene15442	ANXA1
1	GO:1900164	BP	nodal signaling pathway involved in determination of lateral mesoderm left/right asymmetry			1/422	1/12028	0.0350848	0.799363	gene4580	CITED2
1	GO:0099641	BP	anterograde axonal protein transport			1/422	1/12028	0.0350848	0.799363	gene12661	HSPB1
1	GO:0071332	BP	cellular response to fructose stimulus			1/422	1/12028	0.0350848	0.799363	gene15274	SLC2A5
1	GO:0090280	BP	positive regulation of calcium ion import			1/422	1/12028	0.0350848	0.799363	gene19382	STC1
1	GO:0098704	BP	carbohydrate import across plasma membrane			1/422	1/12028	0.0350848	0.799363	gene15274	SLC2A5
1	GO:0043385	BP	mycotoxin metabolic process			1/422	1/12028	0.0350848	0.799363	gene2666	LOC106030436
1	GO:1901623	BP	regulation of lymphocyte chemotaxis			1/422	1/12028	0.0350848	0.799363	gene4789	CXCL14
1	GO:0002538	BP	arachidonic acid metabolite production involved in inflammatory response			1/422	1/12028	0.0350848	0.799363	gene12380	ALOX5AP
1	GO:0090074	BP	negative regulation of protein homodimerization activity			1/422	1/12028	0.0350848	0.799363	gene12027	HSPA5
1	GO:1990379	BP	lipid transport across blood-brain barrier			1/422	1/12028	0.0350848	0.799363	gene9430	MFSD2A
1	GO:0060492	BP	lung induction			1/422	1/12028	0.0350848	0.799363	gene12509	WNT2B
1	GO:2000501	BP	regulation of natural killer cell chemotaxis			1/422	1/12028	0.0350848	0.799363	gene4789	CXCL14
1	GO:2000503	BP	positive regulation of natural killer cell chemotaxis			1/422	1/12028	0.0350848	0.799363	gene4789	CXCL14
1	GO:0032693	BP	negative regulation of interleukin-10 production			1/422	1/12028	0.0350848	0.799363	gene2955	TRIB2
1	GO:0015755	BP	fructose transmembrane transport			1/422	1/12028	0.0350848	0.799363	gene15274	SLC2A5
1	GO:0061308	BP	cardiac neural crest cell development involved in heart development			1/422	1/12028	0.0350848	0.799363	gene4580	CITED2
1	GO:1904764	BP	chaperone-mediated autophagy translocation complex disassembly			1/422	1/12028	0.0350848	0.799363	gene11109	HSPA8
1	GO:0099540	BP	trans-synaptic signaling by neuropeptide			1/422	1/12028	0.0350848	0.799363	gene16250	NTRK2
1	GO:0045360	BP	regulation of interleukin-1 biosynthetic process			1/422	1/12028	0.0350848	0.799363	gene4693	EGR1
1	GO:0045362	BP	positive regulation of interleukin-1 biosynthetic process			1/422	1/12028	0.0350848	0.799363	gene4693	EGR1
1	GO:0032328	BP	alanine transport			1/422	1/12028	0.0350848	0.799363	gene18999	SLC6A17
1	GO:0042339	BP	keratan sulfate metabolic process			1/422	1/12028	0.0350848	0.799363	gene1404	CHST1
1	GO:0010544	BP	negative regulation of platelet activation			1/422	1/12028	0.0350848	0.799363	gene16336	CD9
1	GO:0051969	BP	regulation of transmission of nerve impulse			1/422	1/12028	0.0350848	0.799363	gene18243	FGF12
1	GO:0098908	BP	regulation of neuronal action potential			1/422	1/12028	0.0350848	0.799363	gene18243	FGF12
1	GO:1905335	BP	regulation of aggrephagy			1/422	1/12028	0.0350848	0.799363	gene3578	HSPB8
1	GO:1905337	BP	positive regulation of aggrephagy			1/422	1/12028	0.0350848	0.799363	gene3578	HSPB8
1	GO:0002880	BP	regulation of chronic inflammatory response to non-antigenic stimulus			1/422	1/12028	0.0350848	0.799363	gene16609	ADORA2B
1	GO:0002882	BP	positive regulation of chronic inflammatory response to non-antigenic stimulus			1/422	1/12028	0.0350848	0.799363	gene16609	ADORA2B
1	GO:0060086	BP	circadian temperature homeostasis			1/422	1/12028	0.0350848	0.799363	gene4693	EGR1
1	GO:1903547	BP	regulation of growth hormone activity			1/422	1/12028	0.0350848	0.799363	gene13699	PHLDA2
1	GO:1990832	BP	slow axonal transport			1/422	1/12028	0.0350848	0.799363	gene11109	HSPA8
1	GO:0007198	BP	adenylate cyclase-inhibiting serotonin receptor signaling pathway			1/422	1/12028	0.0350848	0.799363	gene7410	HTR1A
1	GO:0046222	BP	aflatoxin metabolic process			1/422	1/12028	0.0350848	0.799363	gene2666	LOC106030436
1	GO:1904694	BP	negative regulation of vascular smooth muscle contraction			1/422	1/12028	0.0350848	0.799363	gene6023	ARHGAP42
1	GO:0030389	BP	fructosamine metabolic process			1/422	1/12028	0.0350848	0.799363	gene17780	FN3K
1	GO:0061738	BP	late endosomal microautophagy			1/422	1/12028	0.0350848	0.799363	gene11109	HSPA8
1	GO:0061737	BP	leukotriene signaling pathway			1/422	1/12028	0.0350848	0.799363	gene12747	LOC106041580
1	GO:0019953	BP	sexual reproduction			1/422	1/12028	0.0350848	0.799363	gene20213	IL1B
1	GO:0072176	BP	nephric duct development			1/422	1/12028	0.0350848	0.799363	gene13515	WNT11
1	GO:0014062	BP	regulation of serotonin secretion			1/422	1/12028	0.0350848	0.799363	gene7410	HTR1A
1	GO:0042713	BP	sperm ejaculation			1/422	1/12028	0.0350848	0.799363	gene12268	ACVR2A
1	GO:1904428	BP	negative regulation of tubulin deacetylation			1/422	1/12028	0.0350848	0.799363	gene4973	PRKAA2
1	GO:0072272	BP	proximal/distal pattern formation involved in metanephric nephron development			1/422	1/12028	0.0350848	0.799363	gene7683	LOC106035954
1	GO:0072319	BP	vesicle uncoating			1/422	1/12028	0.0350848	0.799363	gene11109	HSPA8
1	GO:0072318	BP	clathrin coat disassembly			1/422	1/12028	0.0350848	0.799363	gene11109	HSPA8
1	GO:0070429	BP	negative regulation of nucleotide-binding oligomerization domain containing 1 signaling pathway			1/422	1/12028	0.0350848	0.799363	gene4565	TNFAIP3
1	GO:0070428	BP	regulation of nucleotide-binding oligomerization domain containing 1 signaling pathway			1/422	1/12028	0.0350848	0.799363	gene4565	TNFAIP3
1	GO:0071599	BP	otic vesicle development			1/422	1/12028	0.0350848	0.799363	gene20084	COL2A1
1	GO:0097709	BP	connective tissue replacement			1/422	1/12028	0.0350848	0.799363	gene13258	CXCL1258
1	GO:0006011	BP	UDP-glucose metabolic process			1/422	1/12028	0.0350848	0.799363	gene16452	UGP2
1	GO:0048668	BP	collateral sprouting			1/422	1/12028	0.0350848	0.799363	gene16250	NTRK2
1	GO:0002827	BP	positive regulation of T-helper 1 type immune response			1/422	1/12028	0.0350848	0.799363	gene15442	ANXA1
1	GO:0034147	BP	regulation of toll-like receptor 5 signaling pathway			1/422	1/12028	0.0350848	0.799363	gene4565	TNFAIP3
1	GO:0060028	BP	convergent extension involved in axis elongation			1/422	1/12028	0.0350848	0.799363	gene13515	WNT11
1	GO:0070194	BP	synaptonemal complex disassembly			1/422	1/12028	0.0350848	0.799363	gene8833	HSPA2
1	GO:0038033	BP	positive regulation of endothelial cell chemotaxis by VEGF-activated vascular endothelial growth factor receptor signaling pathway			1/422	1/12028	0.0350848	0.799363	gene12661	HSPB1
1	GO:0035933	BP	glucocorticoid secretion			1/422	1/12028	0.0350848	0.799363	gene20213	IL1B
1	GO:0030903	BP	notochord development			1/422	1/12028	0.0350848	0.799363	gene20084	COL2A1
1	GO:0098664	BP	G protein-coupled serotonin receptor signaling pathway			1/422	1/12028	0.0350848	0.799363	gene7410	HTR1A
1	GO:0140271	BP	hexose import across plasma membrane			1/422	1/12028	0.0350848	0.799363	gene15274	SLC2A5
1	GO:1901896	BP	positive regulation of ATPase-coupled calcium transmembrane transporter activity			1/422	1/12028	0.0350848	0.799363	gene8833	HSPA2
1	GO:1902726	BP	positive regulation of skeletal muscle satellite cell differentiation			1/422	1/12028	0.0350848	0.799363	gene10690	GPC1
1	GO:0035929	BP	steroid hormone secretion			1/422	1/12028	0.0350848	0.799363	gene20213	IL1B
1	GO:0072573	BP	tolerance induction to lipopolysaccharide			1/422	1/12028	0.0350848	0.799363	gene4565	TNFAIP3
1	GO:1900138	BP	negative regulation of phospholipase A2 activity			1/422	1/12028	0.0350848	0.799363	gene15442	ANXA1
1	GO:1900134	BP	negative regulation of renin secretion into blood stream			1/422	1/12028	0.0350848	0.799363	gene13258	CXCL1258
1	GO:0090331	BP	negative regulation of platelet aggregation			1/422	1/12028	0.0350848	0.799363	gene16336	CD9
1	GO:0002248	BP	connective tissue replacement involved in inflammatory response wound healing			1/422	1/12028	0.0350848	0.799363	gene13258	CXCL1258
1	GO:0051611	BP	regulation of serotonin uptake			1/422	1/12028	0.0350848	0.799363	gene16763	ITGB3
1	GO:0045629	BP	negative regulation of T-helper 2 cell differentiation			1/422	1/12028	0.0350848	0.799363	gene15442	ANXA1
1	GO:0045628	BP	regulation of T-helper 2 cell differentiation			1/422	1/12028	0.0350848	0.799363	gene15442	ANXA1
1	GO:0045623	BP	negative regulation of T-helper cell differentiation			1/422	1/12028	0.0350848	0.799363	gene15442	ANXA1
1	GO:0045625	BP	regulation of T-helper 1 cell differentiation			1/422	1/12028	0.0350848	0.799363	gene15442	ANXA1
1	GO:0045627	BP	positive regulation of T-helper 1 cell differentiation			1/422	1/12028	0.0350848	0.799363	gene15442	ANXA1
1	GO:0060721	BP	regulation of spongiotrophoblast cell proliferation			1/422	1/12028	0.0350848	0.799363	gene13699	PHLDA2
1	GO:0060723	BP	regulation of cell proliferation involved in embryonic placenta development			1/422	1/12028	0.0350848	0.799363	gene13699	PHLDA2
1	GO:0045187	BP	regulation of circadian sleep/wake cycle, sleep			1/422	1/12028	0.0350848	0.799363	gene19011	KCNA2
1	GO:0045188	BP	regulation of circadian sleep/wake cycle, non-REM sleep			1/422	1/12028	0.0350848	0.799363	gene19011	KCNA2
1	GO:0098759	BP	cellular response to interleukin-8			1/422	1/12028	0.0350848	0.799363	gene4693	EGR1
1	GO:0098758	BP	response to interleukin-8			1/422	1/12028	0.0350848	0.799363	gene4693	EGR1
1	GO:0032602	BP	chemokine production			1/422	1/12028	0.0350848	0.799363	gene20213	IL1B
1	GO:0070077	BP	histone arginine demethylation			1/422	1/12028	0.0350848	0.799363	gene6640	JMJD6
1	GO:0070079	BP	histone H4-R3 demethylation			1/422	1/12028	0.0350848	0.799363	gene6640	JMJD6
1	GO:2000349	BP	negative regulation of CD40 signaling pathway			1/422	1/12028	0.0350848	0.799363	gene4565	TNFAIP3
1	GO:2000348	BP	regulation of CD40 signaling pathway			1/422	1/12028	0.0350848	0.799363	gene4565	TNFAIP3
1	GO:0062028	BP	regulation of stress granule assembly			1/422	1/12028	0.0350848	0.799363	gene4973	PRKAA2
1	GO:0031394	BP	positive regulation of prostaglandin biosynthetic process			1/422	1/12028	0.0350848	0.799363	gene15442	ANXA1
1	GO:2000324	BP	positive regulation of glucocorticoid receptor signaling pathway			1/422	1/12028	0.0350848	0.799363	gene3089	LMO3
1	GO:0007210	BP	serotonin receptor signaling pathway			1/422	1/12028	0.0350848	0.799363	gene7410	HTR1A
1	GO:0035624	BP	receptor transactivation			1/422	1/12028	0.0350848	0.799363	gene4021	ADRA2A
1	GO:1901376	BP	organic heteropentacyclic compound metabolic process			1/422	1/12028	0.0350848	0.799363	gene2666	LOC106030436
1	GO:0043390	BP	aflatoxin B1 metabolic process			1/422	1/12028	0.0350848	0.799363	gene2666	LOC106030436
1	GO:0034148	BP	negative regulation of toll-like receptor 5 signaling pathway			1/422	1/12028	0.0350848	0.799363	gene4565	TNFAIP3
1	GO:0006654	BP	phosphatidic acid biosynthetic process			1/422	1/12028	0.0350848	0.799363	gene4102	PLD1
1	GO:1990416	BP	cellular response to brain-derived neurotrophic factor stimulus			1/422	1/12028	0.0350848	0.799363	gene16250	NTRK2
[truncated: 217 more rows]

## Sheet: 120vs300-GO
Number	GO ID	Term Type	Description	Ratio_in_study	Ratio_in_pop	Rich factor	Pvalue	Padjust	Gene_ids	Gene_names
[truncated: 675 more rows]

[truncated: 1 more sheets: 70vs300-GO]
