# Supplementary material for: Transcriptome Profiling Unveils Key Genes Regulating the Growth and Development of Yangzhou Goose Knob
Source: Int J Mol Sci. 2024 Apr 10;25(8):4166. doi: 10.3390/ijms25084166 (PMC11050116; doi:10.3390/ijms25084166)
Supplement: Supplementary file 1 [file ijms-25-04166-s001.zip › Table S6.xlsx]

## Sheet: Guide
Table S6. Number of differentially expressed mRNA genes in chronological expression analysis among 3 comparison groups.
Guide
0profile	Time series expression profile0
1profile	Time series expression profile1
2profile	Time series expression profile2
3profile	Time series expression profile3
4profile	Time series expression profile4
5profile	Time series expression profile5
6profile	Time series expression profile6
7profile	Time series expression profile7

## Sheet: 0profile
Gene.id	symbol	Gene_description	D1201	D1202	D1203	D3001	D3002	D3003	D701	D702	D703
gene10053	AMMECR1	Alport syndrome, mental retardation, midface hypoplasia and elliptocytosis chromosomal region gene 1	7.4	5.86	4.81	2.24	3.16	7.64	12.06	12.54	10.43
gene101	SLC35G1	solute carrier family 35, member G1	7.36	5.65	4.95	1.87	2.62	4.04	11.02	11.38	5.9
gene10119	UGT8	UDP glycosyltransferase 8, transcript variant X1	3.01	2.41	3.23	0.73	1.52	2.63	7.56	13.07	5.69
gene1013	LOC106039346	chromosome unknown open reading frame, human C3orf52, transcript variant X1	2.54	1.97	2.02	2	0.43	1.3	7.77	8.58	3.91
gene10138	PITX2	paired-like homeodomain 2	0.29	0	2.64	0.32	0	0.15	1.81	8.95	0.34
gene10181	LOC106038741	uncharacterized LOC106038741, transcript variant X1	2.25	0.97	0.8	0.6	0.87	1.24	1.61	2.75	3.18
gene10214	LOC106038747	endonuclease domain-containing 1 protein-like, transcript variant X1	3.48	1.93	3.59	0.61	1	1.49	3.57	4.13	6.25
gene10253	NFKBIA	nuclear factor of kappa light polypeptide gene enhancer in B-cells inhibitor, alpha	244.27	225	274.06	72.37	100.14	124.9	197.74	528.27	318.69
gene10329	TMED8	transmembrane emp24 protein transport domain containing 8, transcript variant X1	10.35	8.05	5.61	3.33	4.53	5.14	9.2	12.13	13.55
gene10334	AHSA1	AHA1, activator of heat shock 90kDa protein ATPase homolog 1 (yeast)	101.31	79.88	89.41	37.16	31.78	33.03	131.01	130.78	138.5
gene1055	GPA33	glycoprotein A33 (transmembrane), transcript variant X1	0.75	0.77	0.5	0.26	0.26	0.25	0.87	0.6	1.76
gene10561	LOC106039090	toll-like receptor 1, transcript variant X2	37.97	35.67	33.19	11.08	13.41	16.76	38.42	69.75	46.09
gene10619	IGF2BP2	insulin-like growth factor 2 mRNA binding protein 2, transcript variant X1	8.44	4.55	8.52	2.38	3.53	2.66	10.42	13.65	13.46
gene10624	SLCO2A1	solute carrier organic anion transporter family, member 2A1	19	24.36	34.58	8.98	11.07	21.34	47.54	174.43	38.76
gene10649	KIF1A	kinesin family member 1A	0.25	0.27	0.55	0.28	0.23	0.14	0.31	1.2	0.81
gene10714	GP5	glycoprotein V (platelet)	1.09	0.79	0.84	0.2	0.42	0.7	1.11	2.3	0.95
gene10731	LOC106039326	histamine N-methyltransferase A-like, transcript variant X1	1.77	0.61	0.45	0.29	0.14	0.69	1.55	3.36	0.55
gene10738	LCT	lactase	0.29	0.41	0.58	0.1	0.29	0.3	0.53	1.09	0.93
gene10784	ANKZF1	ankyrin repeat and zinc finger domain containing 1	18.74	14.17	15.82	5.33	17.26	10.98	18.5	26.22	29.77
gene10811	LOC106039322	villin-1-like	1.38	0.64	0.9	0.26	0.5	0.49	1.93	1.48	2.64
gene10829	VCAM1	vascular cell adhesion molecule 1, transcript variant X1	5.67	5.38	14.42	1.76	3.13	2.72	20.55	32.71	6.98
gene10955	TCP1	t-complex 1	158.33	139.09	158.77	75.89	64.52	86.56	223.83	273.77	230.59
gene10996	MYLK3	myosin light chain kinase 3, transcript variant X6	4.87	2.83	2.51	0.49	0.85	2.11	7.33	16.83	8.54
gene11057	ADAM22	ADAM metallopeptidase domain 22, transcript variant X1	1.51	0.68	1.58	0.37	0.27	0.49	1.94	2.22	2.37
gene11092	HEPACAM2	HEPACAM family member 2	0.09	0	0.03	0	0	0.01	0.06	0.71	0.02
gene11109	HSPA8	heat shock 70kDa protein 8	1445.69	1099.79	1141.22	230.88	157.64	121.27	2977.96	3488.11	3390.57
gene11130	PVRL1	poliovirus receptor-related 1 (herpesvirus entry mediator C)	5.53	2.59	7.47	2.25	1.85	2.83	5.69	12.19	4.08
gene11169	IL18	interleukin 18	2.51	2.44	2.91	1.34	0.78	1.52	3.9	8.23	3.98
gene11254	EED	embryonic ectoderm development	31.48	26.78	29.6	10.15	15.25	23.52	38.53	137.07	30.28
gene11338	NABP1	nucleic acid binding protein 1	34.37	29.9	27.48	7.5	7.49	19.12	59.01	81.98	44.92
gene11339	LOC106039990	uncharacterized LOC106039990, transcript variant X1	1.97	1.35	2.03	1.04	2.11	1.03	2.56	3.86	3.88
gene11436	WNT7A	wingless-type MMTV integration site family, member 7A	0.8	0.13	0.37	0	0.15	0.23	1.06	2.13	0.83
gene1149	RALY	RALY heterogeneous nuclear ribonucleoprotein	9.31	5.41	3.03	2.65	2.11	1.96	5.07	5.83	17.25
gene11525	FHAD1	forkhead-associated (FHA) phosphopeptide binding domain 1, transcript variant X1	7.84	5.15	5.23	0.41	3.17	3.14	14.05	20.99	7.25
gene11543	TNFRSF1B	tumor necrosis factor receptor superfamily, member 1B	8.55	10.1	5.24	2.46	3.34	4.37	30.02	24.97	40.13
gene11572	LOC106040102	uncharacterized LOC106040102	1.33	0.06	0.57	0	0.05	0	2.21	6.32	0.26
gene11578	DGKQ	diacylglycerol kinase, theta 110kDa	8.88	7.86	4	4.45	4.63	4.9	6.48	14.47	10.36
gene11625	LOC106040256	uncharacterized LOC106040256	10	6.45	7.48	4.97	4.87	7.96	16.37	21.77	11.45
gene11635	LOC106040280	G-protein coupled receptor 35-like	2.78	2.72	1.18	0.52	0.61	0.75	1.42	3.37	5.92
gene1168	PKIG	protein kinase (cAMP-dependent, catalytic) inhibitor gamma, transcript variant X1	75.16	63.39	63.14	40.7	46.05	34.17	72.52	165.84	107.6
gene11736	EXPH5	exophilin 5	3.93	0.83	2.48	1.01	1.49	1.44	4.6	9.41	2.18
gene11800	TRABD	TraB domain containing, transcript variant X2	17.42	13.53	15.65	6.26	10.56	11.55	19.89	26.34	20.32
gene11905	LOC106040581	uncharacterized LOC106040581	0.49	0.28	0.55	0.2	0.14	0.26	1.16	0.66	0.91
gene11910	LOC106040586	uncharacterized LOC106040586, transcript variant X3	6.41	4.2	6.28	3.07	2.47	1.97	19.88	15.3	10.8
gene1195	PREX1	phosphatidylinositol-3,4,5-trisphosphate-dependent Rac exchange factor 1	24.19	20.5	11.92	8.5	12.12	14.99	20.5	20.25	33.31
gene11964	CARD9	caspase recruitment domain family, member 9, transcript variant X1	47.18	19.91	26.51	16.88	26.4	12.26	59.98	61.07	54.65
gene11982	LOC106040729	uncharacterized LOC106040729	2.95	1.98	2.57	0.44	1.6	2.15	4.18	9.52	2.45
gene12009	CRB2	crumbs family member 2, transcript variant X1	2.02	1.19	1.97	0.72	1.43	0.78	1.66	2.97	2.15
gene12027	HSPA5	heat shock 70kDa protein 5 (glucose-regulated protein, 78kDa)	379.76	660.62	490.15	238.34	286.98	296.48	1615.53	2243.15	1695.83
gene12028	GAPVD1	GTPase activating protein and VPS9 domains 1	22.7	17.35	16.14	8.58	10.49	12.14	20.95	23.09	27
gene1204	B4GALT5	UDP-Gal:betaGlcNAc beta 1,4- galactosyltransferase, polypeptide 5	9.39	7.57	7.62	3.67	2.94	5.08	16.85	26.81	14.73
gene12051	HELZ2	helicase with zinc finger 2, transcriptional coactivator, transcript variant X1	14.82	5.51	28.18	3.64	5.71	4.33	22.43	48.27	8.08
gene12052	LOC106040764	helicase with zinc finger domain 2-like	6.44	1.12	6.88	1.17	1.78	0.62	7.8	14.96	1.94
gene12055	RTEL1	regulator of telomere elongation helicase 1	5.01	5	5.52	1.54	2.64	4.98	3.63	9.53	6.98
gene12078	LOC106040808	peroxidasin homolog	3.36	3.51	1.01	0.81	1.46	2.46	8.6	3.5	1.85
gene1209	SNAI1	snail family zinc finger 1	9.37	10.5	9.41	6.77	7.29	5.1	17.97	27.86	10.46
gene1214	PTPN1	protein tyrosine phosphatase, non-receptor type 1	36.07	31.19	25.21	16.46	16.64	18.06	40.38	37.43	69.92
gene12142	MICALCL	MICAL C-terminal like	1.7	0.63	0.77	0.38	0.41	0.78	1.92	2.4	1.81
gene12143	MICAL2	microtubule associated monooxygenase, calponin and LIM domain containing 2, transcript variant X1	15.03	12.96	9.88	5.68	6.21	10.36	17.97	24.05	22.69
gene12161	LOC106040894	uncharacterized LOC106040894	14.23	14.99	12.89	4.21	6.35	6.8	62.82	33.22	27.82
gene12168	TMEM41B	transmembrane protein 41B	7.88	4.52	8.28	4.35	4.14	4.31	16.68	17.48	7.58
gene12170	SCUBE2	signal peptide, CUB domain, EGF-like 2, transcript variant X1	1.76	1.52	0.96	0.68	1.08	0.96	2.23	2.79	3.56
gene12171	NRIP3	nuclear receptor interacting protein 3, transcript variant X1	0.51	0.27	0.19	0.12	0.2	0.2	0.87	2.85	0.65
gene12216	NOCT	nocturnin	8.87	7.94	8.49	3.8	1.7	4.79	14.93	28.81	14.19
gene12288	LOC106041089	C-C motif chemokine 3-like 1	1.26	2.97	2.88	1.13	1.88	0.64	4.66	23.27	13.4
gene12289	LOC106041087	E3 ubiquitin-protein ligase TRIM39-like	0.98	0.96	1.41	0.53	0.67	0.62	1.81	2.37	1.72
gene12290	LOC106041041	C-C motif chemokine 4 homolog	21.12	12.41	6.09	3.59	4.16	4.25	28.06	83.05	32.19
gene12304	MTMR4	myotubularin related protein 4	23.44	22.66	21.39	11.69	15.74	13.63	25.79	37.67	36.77
gene12312	LIMK1	LIM domain kinase 1	10.16	7.64	10.75	4.48	6.42	5.54	9.09	18.27	12.15
gene12380	ALOX5AP	arachidonate 5-lipoxygenase-activating protein	48.22	31.46	29.43	23.05	20.78	35.03	97.67	83.41	64.51
gene12381	HSPH1	heat shock 105kDa/110kDa protein 1	93.67	74.91	92.67	10.11	14.61	12.13	321.64	324.68	325.76
gene12412	LOC106041201	uncharacterized LOC106041201	1.09	0.83	0.43	0.5	0.33	0.45	1.16	0.97	2.11
gene12442	SOCS1	suppressor of cytokine signaling 1	18.13	13.76	29.14	5.46	6.62	6.1	33.06	68.57	21.95
gene12487	DENND2C	DENN/MADD domain containing 2C, transcript variant X1	30.19	31.41	31.43	12.99	21.72	32.41	45.13	64.66	41.37
gene1251	DOK5	docking protein 5, transcript variant X1	4.79	3.84	4.05	4.04	1.76	2.51	13.96	8.84	5.39
gene12524	LOC106041346	chromosome unknown open reading frame, human C6orf132	1.84	0.13	1.9	0.21	0.22	0.31	2.47	3.94	0.84
gene12566	RAB7B	RAB7B, member RAS oncogene family	47.76	50.8	56.98	18.87	26.98	35.73	64.22	99.72	77.76
gene12590	PPP1R15B	protein phosphatase 1, regulatory subunit 15B	31.9	25.12	22.26	18.46	18.23	21.44	47.78	50.85	36.86
gene12591	PLEKHA6	pleckstrin homology domain containing, family A member 6	6.12	4.18	5.42	1.49	4.47	1.62	11.74	15.13	8.62
gene12602	WDR81	WD repeat domain 81	12.27	11.6	11.78	8.45	9.57	10.32	17.23	24.07	21.04
gene12662	YWHAG	tyrosine 3-monooxygenase/tryptophan 5-monooxygenase activation protein, gamma, transcript variant X1	30.18	32.67	23.15	21.12	15.57	21.92	51.4	65.93	48.49
gene12665	LOC106041406	ras GTPase-activating protein 4-like	12.5	10.06	13.25	3.78	5.92	8.87	16.02	37.19	16.82
gene127	ANKRD22	ankyrin repeat domain 22, transcript variant X4	3.17	0.68	4.48	0.11	0.6	0.87	5.7	27.72	2.66
gene1270	BMP7	bone morphogenetic protein 7	2.25	0.39	2.1	0.78	0.38	0.3	22.07	2.93	1.73
gene12725	NTS	neurotensin	12.59	62.85	17.1	13.56	8.47	10.33	86.56	58.65	57.33
gene12747	LOC106041580	regulator of G-protein signaling 1-like	58.84	42.03	54.48	10.85	15.21	8.66	101.47	136.6	340.23
gene12755	LOC106041540	P-selectin-like	193.03	306.82	159.47	43.02	30.55	58.92	189.86	533.11	596
gene12760	UAP1	UDP-N-acetylglucosamine pyrophosphorylase 1	49.77	68.52	43.92	30.83	30.93	22.34	193.23	241.54	83.94
gene12762	NOS1AP	nitric oxide synthase 1 (neuronal) adaptor protein	17.91	19.31	22.08	8.14	7.02	10.73	36.72	30.64	24.4
gene12765	LOC106041627	transmembrane protein 121, transcript variant X2	0.94	0.91	4.43	0.23	0.35	0.58	3.89	11.31	1.72
gene12788	LOC106041570	uncharacterized LOC106041570	1.27	3.12	0.91	0.27	0.96	0.86	5.7	19.67	12.73
gene12856	LOC106041678	interleukin-1 receptor type 1-like, transcript variant X3	8.23	2	8.18	1.56	4.53	2.38	10.16	13.25	4.42
gene12858	IL1R2	interleukin 1 receptor, type II, transcript variant X1	15.01	3.18	9.3	1.79	7.81	2.71	8.26	34.21	10.76
gene1286	ANKRD60	ankyrin repeat domain 60, transcript variant X1	0.76	0.3	0.19	0	0	0.22	1.85	0.68	1.4
gene12889	RNF182	ring finger protein 182, transcript variant X5	0.97	0.31	0.5	0.29	0.6	0.39	0.86	1.69	1.65
gene12890	CD83	CD83 molecule	67.34	43.11	45.79	19.92	30.72	18.34	96.26	75.88	154.85
gene13078	AREG	amphiregulin	0.99	0.15	1.91	0	0	0.46	3.87	19.79	2.88
gene13117	WDR47	WD repeat domain 47	18.67	11.8	15.79	5.13	9.52	13.37	20.24	23.69	17.22
gene13257	F2RL1	coagulation factor II (thrombin) receptor-like 1	2.28	0.8	3.1	0.7	0.54	0.53	3.91	3.55	5.22
gene13258	F2R	coagulation factor II (thrombin) receptor, transcript variant X1	8.91	6.33	7.44	4.28	4.3	8.51	14.26	13.85	16.19
gene13263	NYX	nyctalopin, transcript variant X2	9.25	3.53	4.17	1.92	3.44	4.17	12.68	14.92	8.46
gene13264	LOC106042149	uncharacterized LOC106042149	471.11	493.14	457.03	249.24	294.95	360.94	862.69	920.52	797.88
gene13304	LOC106042201	ubiquitin carboxyl-terminal hydrolase CYLD-like, transcript variant X2	13.03	11.57	9.31	4.98	7.1	8.11	10.47	14.36	25.21
gene13385	SSTR4	somatostatin receptor 4	18.1	27.09	24.03	7.57	5.94	19.16	47.17	68.02	22.71
gene13403	CHAC2	ChaC, cation transport regulator homolog 2 (E. coli)	5.57	4.96	4.11	2.37	2.52	5	7.67	7.07	7.64
gene13538	LOC106042437	uncharacterized LOC106042437, transcript variant X1	24.86	19.47	30.7	9.28	10.45	10.98	70.46	56.45	39.09
gene13539	HSPA4L	heat shock 70kDa protein 4-like, transcript variant X1	81.34	71.59	74.13	45.21	47	44.54	187.01	148.1	172.56
gene13572	TRPC3	transient receptor potential cation channel, subfamily C, member 3	0.44	0.88	1.2	0.44	0.33	0.65	1.82	2.89	1.48
gene13588	NCF2	neutrophil cytosolic factor 2	10.07	8.16	8.13	3.28	3.41	5.74	7.54	19.7	13.85
gene1364	LOC106040722	cytosolic phospholipase A2 epsilon-like	0.67	0.06	0.99	0.02	0.08	0.02	1.78	5.37	0.49
gene13765	MAP3K8	mitogen-activated protein kinase kinase kinase 8	6.44	4.78	8.2	3.77	8.21	3.43	11.23	13.14	10.65
gene13823	CCDC125	coiled-coil domain containing 125, transcript variant X1	15.68	10.13	14.15	5.52	6.52	8.52	24.06	12.07	15.51
gene13840	HBEGF	heparin-binding EGF-like growth factor	13.36	48.8	21.43	7.09	14.27	5.81	58.94	304.56	106.59
gene13852	DUSP1	dual specificity phosphatase 1	106.25	61.34	110.22	43.15	44.82	40.11	260.15	619.31	298.33
gene13864	MSX2	msh homeobox 2	1.63	0.93	0.93	0.13	0.61	0.24	2.35	3.16	1.33
gene13882	DUSP7	dual specificity phosphatase 7	91.34	70.69	58.4	30.8	32.98	29.19	152.9	249.2	162.26
gene13912	LOC106042799	hyaluronidase-2-like	25.33	30.68	50.46	16.03	11.83	18.86	38.7	77.36	27.92
gene13914	ZMYND10	zinc finger, MYND-type containing 10	7.09	6.57	6.06	3.11	3.71	3.55	8.89	11.02	9.56
gene13920	CISH	cytokine inducible SH2-containing protein	37.09	25.11	27.36	9.89	8.24	12.52	60.02	153.37	107.88
gene13985	POC5	POC5 centriolar protein, transcript variant X1	13.67	8.95	11.01	4.24	3.73	7.34	16.08	8.12	22.27
gene1404	CHST1	carbohydrate (keratan sulfate Gal-6) sulfotransferase 1	2.32	1.93	2.32	0.74	0.78	0.21	20.5	7.18	2.39
gene14050	CYSLTR1	cysteinyl leukotriene receptor 1, transcript variant X1	18.7	16.07	5.97	10.15	9.45	6.72	13.47	18.64	23.86
gene14051	LOC106042984	G-protein coupled receptor 183-B-like	4.29	1.65	4.6	1.49	1.7	2.89	6.52	16.13	4.72
gene14061	LOC106043001	uncharacterized LOC106043001, transcript variant X2	0.08	0.15	0.06	0	0	0.03	0.94	1.12	0.66
gene14066	LOC106042945	uncharacterized protein CXorf21-like, transcript variant X1	2.47	1.12	1.41	0.57	0.81	0.9	2.78	4.29	5.21
gene14115	TXN	thioredoxin	714.04	468.74	891.2	367.02	385.18	548.86	1316.13	1381.26	584.47
gene14139	CBFB	core-binding factor, beta subunit	74.01	55.7	62.18	35.03	44.11	44.47	99.01	132.95	94.89
gene14173	LOC106043120	galanin receptor type 1-like	1.55	1.29	0.82	0.3	0.64	0.63	1	1.28	4.04
gene14207	FOXN2	forkhead box N2, transcript variant X2	11.83	13.73	9.68	7.5	7.8	9.46	18.39	20.5	20.61
gene14394	MESDC1	mesoderm development candidate 1	24.31	18.83	20.98	13.01	10.83	17.18	30.64	40.62	29.02
gene14414	BNC1	basonuclin 1, transcript variant X1	1.72	0.02	1.24	0.39	0.23	0.81	0.92	1.81	1.26
gene14428	USP50	ubiquitin specific peptidase 50	0.67	0.17	0.13	0	0.15	0.21	0.53	1.33	0.89
gene14429	LOC106043382	transient receptor potential cation channel subfamily M member 7-like	15.34	13.06	13.59	3.27	6.99	8.99	20.07	28.55	18.9
gene14438	RUNX1	runt-related transcription factor 1	16.47	10.77	10.02	3.26	6.26	5.09	13.03	21.29	20.78
gene14442	RCAN1	regulator of calcineurin 1, transcript variant X1	51.38	57.26	63	20.82	22.12	23.99	122.4	196.84	100.1
gene14443	KCNE1	potassium channel, voltage gated subfamily E regulatory beta subunit 1	0.14	0.3	0.14	0.07	0	0	0.68	0.69	0.69
gene14465	IL10RB	interleukin 10 receptor, beta	13.35	8.73	9.26	5.41	8.22	4.87	7.08	24.2	14.24
gene14526	TOP1	topoisomerase (DNA) I	74.68	70.26	66.28	30.96	33.37	51.68	64.25	107.73	101.9
gene14560	LOC106043549	uncharacterized LOC106043549, transcript variant X2	0.43	0.11	0.2	0.04	0	0.15	0.68	0.47	0.82
gene14563	LOC106043511	ovocalyxin-32-like	229.55	251.03	331.77	161.4	124.94	257.16	421.51	827.89	294.05
gene14572	PTX3	pentraxin 3, long	22.47	79.75	98.45	15.19	27.34	41.88	213.04	862.69	102.91
gene14611	IL23R	interleukin 23 receptor	5	1.47	4.2	1.27	2.19	2.25	5.79	10.26	7.15
gene14666	LOC106043628	uncharacterized LOC106043628	4.55	3.67	4.67	0.96	2.74	2.32	6.62	5.85	7.97
gene14681	LOC106043665	uncharacterized LOC106043665	23.27	20.55	20.02	11.92	9.89	11.06	37.65	30.44	15.6
gene14695	DENND4A	DENN/MADD domain containing 4A	24.17	12.22	13.31	10.1	14.94	13.8	25.9	35.27	23.04
gene14760	SLCO4C1	solute carrier organic anion transporter family, member 4C1	1.85	1.01	0.76	0.23	0.64	0.55	5.24	7.58	4.24
gene14806	EVI2A	ecotropic viral integration site 2A, transcript variant X2	7.75	6.11	6.21	2.47	3.34	2.81	8.36	8.2	14.84
gene14865	SLC22A23	solute carrier family 22, member 23	9.56	6.07	10.61	3.81	6.87	7.85	13.27	12.94	21.06
gene14889	ERMN	ermin, ERM-like protein	1.11	0.3	0.89	0.24	0.23	0.23	3.48	1.25	2.53
gene14929	SLAIN1	SLAIN motif family, member 1	1.95	1.78	2.29	1.35	2.37	1.02	6.25	2.66	1.89
gene14957	JCHAIN	joining chain of multimeric IgA and IgM	548.89	858.74	369.07	102.83	95.16	71.58	204.08	268.13	3125.04
gene1496	CD44	CD44 molecule (Indian blood group)	120.61	83.12	78.42	63.61	62.53	44.36	303.17	467.66	301.2
gene1497	LOC106044451	uncharacterized LOC106044451, transcript variant X1	9.75	1.42	6.41	0.07	0.72	0.97	19.29	98.13	15.46
gene14973	LOC106043981	sulfotransferase 1 family member D1-like	1.76	1.49	1.12	0.68	0.73	0.5	1.95	2.12	2.46
gene15002	LOC106044052	chromosome unknown open reading frame, human C14orf37	0.44	0.1	0.23	0.02	0	0.12	0.88	3.7	0.47
gene15033	GCH1	GTP cyclohydrolase 1	3.16	3.14	7.22	0.56	0.64	1.94	27.73	81.8	9.66
gene15045	GNPNAT1	glucosamine-phosphate N-acetyltransferase 1, transcript variant X2	17.79	21.44	21.44	15.14	12.68	11.35	50.47	96.86	23.37
gene15046	STYX	serine/threonine/tyrosine interacting protein, transcript variant X1	13.04	12.97	16.24	5.66	7.51	9.72	15.75	26.46	14.76
gene15059	ASS1	argininosuccinate synthase 1	38.03	38.69	38.43	18.39	25.33	38.77	87.97	129.07	30.98
gene15187	SEMA7A	semaphorin 7A, GPI membrane anchor (John Milton Hagen blood group), transcript variant X1	17.34	12.76	14.41	6.72	7.37	10.5	14.12	22.65	26.82
gene1520	ANO1	anoctamin 1, calcium activated chloride channel, transcript variant X2	6.58	7.09	3.74	2.24	4.09	4.72	9.21	29.54	14.07
gene15205	LOC106044193	chromosome unknown open reading frame, human C15orf39	12.12	13.25	10.55	6.11	4.77	9.14	14.73	18.12	14.52
gene15212	REC114	REC114 meiotic recombination protein, transcript variant X1	8.87	6.15	14.25	6.73	4.57	5.32	24.38	13.92	7.98
gene15297	CASZ1	castor zinc finger 1	5.86	4.15	4.36	2.35	3.59	3.26	4.94	9.02	6.45
gene15304	AOAH	acyloxyacyl hydrolase (neutrophil), transcript variant X1	3.21	2.22	1.68	0.67	0.57	0.71	5.58	2.88	5.83
gene15328	LOC106044340	uncharacterized LOC106044340	0.41	0.29	0.36	0.04	0.03	0.13	1.54	0.55	0.48
gene15351	LOC106044437	chromosome unknown open reading frame, human C8orf4	129.73	132.72	177.2	69.78	42.86	106.65	245.14	424.16	197.61
gene15397	LOC106044391	uncharacterized LOC106044391	7.42	4.14	4.49	2.22	1.8	2.03	8.55	8.77	7.49
gene15436	ABHD17B	abhydrolase domain containing 17B	15.7	11.4	12.45	8.02	6.65	7.77	24.87	22.21	16.87
gene15553	CCNL2	cyclin L2	133.23	100.01	114.93	33.08	73.39	84.61	130.33	182.89	150.37
gene15613	RHOB	ras homolog family member B	197.6	119.62	191.94	115.31	100.48	113.1	139.43	422.73	224.51
gene15653	SRF	serum response factor (c-fos serum response element-binding transcription factor)	45.52	67.55	42.1	27.46	31.11	29.89	57.91	87.11	77.09
gene15729	HTR2B	5-hydroxytryptamine (serotonin) receptor 2B, G protein-coupled, transcript variant X2	3.73	1.08	1.88	0.97	1.13	1.59	3.54	11.38	4.89
gene15822	RAB27B	RAB27B, member RAS oncogene family, transcript variant X1	9.57	7.03	8.78	4.65	4.39	6.09	11.52	14.16	7.62
gene15847	MAST3	microtubule associated serine/threonine kinase 3	41.85	35.3	28.89	16.76	24.09	20.94	55.94	111.42	45.38
gene15852	LOC106045009	ectoderm-neural cortex protein 1-like	12.26	9.27	9.26	3.72	6.03	3.07	17.86	32.86	20.12
gene15856	MYO9B	myosin IXB	55.16	44.84	35.63	17.88	31.03	40.45	59.28	76.97	86.06
gene15867	LOC106044968	uncharacterized LOC106044968	22.29	14.11	14.06	5.95	9.6	9.37	22.67	19.71	29.91
gene15871	KLF2	Kruppel-like factor 2	241.38	166.99	224.33	101.32	85.03	148.76	385.67	728.17	327.82
gene15884	UHRF1	ubiquitin-like with PHD and ring finger domains 1	17.89	21.71	17.12	6.94	11.44	6.65	18.52	34.26	26.24
gene1589	APOLD1	apolipoprotein L domain containing 1	36.37	53.35	54.82	36.47	23.98	24.47	43.69	94.59	110.9
gene15956	PLXNB1	plexin B1, transcript variant X1	3.58	1.06	3.04	0.57	1.75	0.81	3.55	7.93	2.4
gene15960	GRIP2	glutamate receptor interacting protein 2, transcript variant X1	0.86	0.25	0.91	0.18	0.18	0.65	0.57	1.81	1.41
gene15979	LOC106045055	uncharacterized LOC106045055, transcript variant X2	0.55	0.31	0.27	0.06	0.14	0.17	0.56	0.7	0.88
gene16094	BAG3	BCL2-associated athanogene 3	62.82	38.34	55.6	21.35	24.87	11.54	253.8	191.62	200.39
gene16119	SLC18A2	solute carrier family 18 (vesicular monoamine transporter), member 2	2.44	3.35	3.5	1.65	1.39	2.28	5.18	4.99	5.12
gene16176	CREM	cAMP responsive element modulator, transcript variant X1	25.22	32.1	36.12	9.51	7.79	11.22	168.27	293.27	119.1
gene16186	SLC39A8	solute carrier family 39 (zinc transporter), member 8	3.52	1.22	1.92	0.15	0.39	0.67	2.7	5.98	6.23
gene16208	ARHGEF38	Rho guanine nucleotide exchange factor (GEF) 38	0.23	0.11	0.16	0.02	0.04	0.09	0.17	0.51	0.22
gene16259	UBQLN1	ubiquilin 1	62.74	51.75	56.26	42.64	41.51	43.57	95.02	107.2	108.43
gene16264	FAM83C	family with sequence similarity 83, member C	4.15	0.04	4.27	0.16	0.37	0.15	6.25	18.21	2.19
gene16286	SAMHD1	SAM domain and HD domain 1, transcript variant X1	37.69	22.25	64.66	8.36	16.72	19.82	85.19	120.05	33.69
gene16313	TLE4	transducin-like enhancer of split 4, transcript variant X1	12.33	9.57	8.49	4.55	6.17	5.84	13.03	15.06	16.2
gene16324	BCAT1	branched chain amino-acid transaminase 1, cytosolic, transcript variant X1	21.53	30.1	14.23	11.79	15.02	12.15	52.55	37.91	46.97
gene16335	NOBOX	NOBOX oogenesis homeobox, transcript variant X1	1.18	0.46	0.97	0.36	0.29	0.53	2.28	2.39	2.2
gene16336	CD9	CD9 molecule	295.77	163.8	304.49	139.36	144.55	160.86	583.29	949.95	334.19
gene16418	SLC8A1	solute carrier family 8 (sodium/calcium exchanger), member 1, transcript variant X3	6.14	4.2	3.19	2.02	2.06	4.02	5.57	5.5	6.65
gene16438	CHGB	chromogranin B, transcript variant X1	19.61	10.87	25.78	2.65	3	4.39	23.63	241.5	24.35
gene16479	PRAM1	PML-RARA regulated adaptor molecule 1, transcript variant X1	8.12	8.47	12.47	4.25	7.41	3.92	13.27	39.72	11.26
gene16484	MATK	megakaryocyte-associated tyrosine kinase, transcript variant X1	25.67	26.31	19.37	5.75	7.02	4.16	42.53	51.57	51.07
gene16499	FZR1	fizzy/cell division cycle 20 related 1	32.99	30.17	26.52	13.09	16.41	21.51	34.77	37.52	39.39
gene16505	MEX3D	mex-3 RNA binding family member D	10.46	10.77	5.85	2.33	5.7	2.59	8.37	16.79	13.82
gene16515	LOC106045650	nuclear receptor ROR-beta-like	2.1	0.04	2.01	0.5	0.57	0.4	1.42	4.26	1.64
gene1661	PAWR	PRKC, apoptosis, WT1, regulator	7.54	3.06	6.26	2.39	2.2	4.16	6.47	10.4	10.74
gene16625	SSH2	slingshot protein phosphatase 2	12.36	10.19	8.38	5.1	6.53	5.89	7.44	14.9	21.29
gene16629	NUFIP2	nuclear fragile X mental retardation protein interacting protein 2	7.33	6.79	4.58	2.76	2.85	4.38	8.81	12.44	13.42
gene16642	LOC106045865	acidic mammalian chitinase-like	74.1	54.05	19.25	8.62	59.08	15.51	116.39	126.17	133.37
gene16803	CACNG3	calcium channel, voltage-dependent, gamma subunit 3	4.22	1.43	0.58	0.32	0.15	1.18	5.09	4.62	1.51
gene16804	RBBP6	retinoblastoma binding protein 6	24.41	22.76	19.44	11.84	17.78	17.99	33.26	31.95	38.74
gene1681	LOC106046673	glioma pathogenesis-related protein 1-like	6.35	4.88	3.65	2.07	1.86	1.98	6.35	8.12	16.39
gene16829	NSMCE1	NSE1 homolog, SMC5-SMC6 complex component, transcript variant X2	57.19	45.93	47.27	25.82	27.92	41.42	91.56	180.66	63.86
gene16880	LOC106046116	cadherin EGF LAG seven-pass G-type receptor 2-like	0.51	0.32	0.58	0.14	0.02	0.2	1.09	0.98	1.44
gene16888	LOC106046187	cryptochrome-1-like, transcript variant X1	8.34	5.18	12.01	3.62	5.88	5.46	14.61	13.55	6.1
gene16898	BAK1	BCL2-antagonist/killer 1, transcript variant X1	29.54	28.18	23.51	14.65	15.25	16.02	30.26	47.24	40.37
gene16925	PPARD	peroxisome proliferator-activated receptor delta, transcript variant X3	21.56	18.48	20.6	9.54	13.28	12.67	29.43	38.38	29.6
gene16933	FKBP5	FK506 binding protein 5, transcript variant X1	269.44	226.49	215.21	49.49	46.31	191.26	309.64	455.13	276.41
gene16946	LOC106046136	serine/threonine-protein kinase pim-1-like	20.02	13.71	19.51	5.42	9.53	8.53	31.23	60.68	42.32
gene17017	LOC106046256	uncharacterized LOC106046256	0.33	0.14	0.13	0	0.02	0.08	0.46	1.31	0.58
gene17105	SLA	Src-like-adaptor	33.83	21.21	23.48	7.43	6.02	3.91	58.83	125.37	108.11
gene17118	GPC5	glypican 5, transcript variant X1	2.03	1.22	0.91	0.42	0.66	0.65	1.33	2.95	1.69
gene1713	CCT2	chaperonin containing TCP1, subunit 2 (beta), transcript variant X1	127.19	109.2	114.15	58.46	56.41	66.63	134.05	170.57	154.24
gene17145	LOC106046397	guanylate-binding protein 3-like	169.03	79.22	241.92	56.17	107.97	104.28	221.3	412.57	85.88
gene1716	LYZ	lysozyme	4.23	2.44	2.59	1.12	1.06	2.47	6.03	9.43	2.24
gene17166	LOC106046437	uncharacterized LOC106046437, transcript variant X2	0.06	0.16	0.28	0	0.02	0.06	0.44	5.78	0.82
gene17170	F10	coagulation factor X	22.97	12.18	23.4	7.39	4.83	8.78	29.8	87.55	39.13
gene17334	NQO1	NAD(P)H dehydrogenase, quinone 1, transcript variant X1	1.25	0.26	0.72	0.22	0.56	0.24	2.14	1.87	0.79
gene17352	ZNF821	zinc finger protein 821, transcript variant X1	32.17	26.43	24.46	10.65	11.58	14.92	29.1	40.44	43.03
gene17377	COL6A6	collagen, type VI, alpha 6, transcript variant X2	47.37	8.51	10.35	1.9	0.64	2.94	92.03	73.13	110.06
gene17378	PIK3R4	phosphoinositide-3-kinase, regulatory subunit 4	16.35	10.5	11.5	6.51	5.42	10.58	13.73	16.79	18.49
gene17444	AATK	apoptosis-associated tyrosine kinase	3.67	3.72	2.95	0.98	0.51	2.31	3.64	8.73	6.76
gene17449	NPTX1	neuronal pentraxin I	5.81	0.28	4.31	0	0.67	0.9	9.18	16.72	3.04
gene17466	USP36	ubiquitin specific peptidase 36	14.56	12.14	9.45	7	10.63	10.11	16.91	27.15	17.91
gene17468	CYTH1	cytohesin 1	56.85	53.72	39.2	21.93	29.52	18.11	67.61	78.75	90.95
gene17469	DNAH17	dynein, axonemal, heavy chain 17	3.99	3.1	2.31	0.45	0.47	0.73	10	13.22	14.81
gene17501	SLC16A3	solute carrier family 16 (monocarboxylate transporter), member 3, transcript variant X2	6.51	5.93	4.25	3.27	1.74	2.98	11.58	11.97	12
gene1753	LOC106045444	-	1.81	3.17	3.56	1.28	0.5	0.35	7.94	3.61	2.98
gene17580	NMI	N-myc (and STAT) interactor, transcript variant X1	63.47	31.25	123.53	35.49	48.25	36.66	121.91	197.85	46.37
gene17682	EXOC3L4	exocyst complex component 3-like 4, transcript variant X1	0.44	0.15	1.53	0.47	0.08	0.28	1.11	1.62	0.56
gene17686	TRAF3	TNF receptor-associated factor 3, transcript variant X3	15.05	11.67	7.88	3.22	5.96	6.18	11.2	13.67	24.37
gene17711	IFITM5	interferon induced transmembrane protein 5	2.44	0.61	3.04	0.23	0.31	1.03	5.16	8.89	3.47
gene17723	LOC106047082	ras-related and estrogen-regulated growth inhibitor-like	4.7	1.74	2.62	0.76	0.84	1.12	9.76	9.83	6.83
gene17725	LOC106047016	SITS-binding protein-like	0.41	0.27	0.24	0	0	0.18	2.03	1.1	0.49
gene17850	MMP9	matrix metallopeptidase 9	9.54	9.59	5.17	1.54	2.6	2.29	13.08	54.36	15.19
gene17855	SLC35C2	solute carrier family 35 (GDP-fucose transporter), member C2, transcript variant X1	6.97	7.81	8.08	1.99	3.82	3.64	13.43	14.05	13.7
gene17864	LOC106047160	protein-glutamine gamma-glutamyltransferase E-like	2.78	1.28	3.46	1.34	1.49	1	2.86	14.85	2.85
gene17896	AJAP1	adherens junctions associated protein 1	1.6	1.33	0.54	0.76	0.04	0.3	5.09	2.98	1.26
gene17913	KLHL21	kelch-like family member 21, transcript variant X1	30.79	26.02	31.48	16.9	23.01	25.8	42.56	71.66	36.81
gene17914	PHF13	PHD finger protein 13	13.58	10.67	12.41	5.68	7	7.21	16.06	20.12	12.78
gene1792	SLC38A2	solute carrier family 38, member 2	150.82	97.42	129.73	61.95	74.63	99.6	214.21	290.53	200.83
gene17939	ASB6	ankyrin repeat and SOCS box containing 6	19.12	16.42	12.97	10.68	8.15	10.92	21.37	26.14	25.26
gene17993	STK32C	serine/threonine kinase 32C, transcript variant X1	3.77	2.22	2.66	1.69	1.71	2.1	6.44	10.64	3.15
gene18	NPM3	nucleophosmin/nucleoplasmin 3, transcript variant X2	13.1	12.32	8.74	2.02	1.25	3.56	17.11	76.71	19.75
gene18088	B2M	beta-2-microglobulin	4359.7	1753.85	3690.03	1748.84	2024.94	1475.76	6036.04	2607.56	3739.2
gene18120	LOC106047476	uncharacterized LOC106047476	15.19	2.01	6.86	1.58	7.49	5.86	8.74	10.02	23.37
gene18131	SLC7A4	solute carrier family 7, member 4	0.61	0.48	0.22	0.04	0.35	0.22	0.45	1.08	0.61
gene18144	ASB12	ankyrin repeat and SOCS box containing 12	0.43	0.35	0.31	0	0.12	0.08	1.35	1.01	1.15
gene18153	LOC106047520	Krueppel-like factor 5	0.42	0.17	0.87	0.09	0.12	0.09	0.9	1.82	0.7
gene18170	LOC106047519	endothelin B receptor-like	1.83	2.07	1.57	0.53	0.58	0.79	3.86	2.09	3.07
gene18195	SLC35F2	solute carrier family 35, member F2, transcript variant X2	1.93	1.26	1.82	0.71	0.78	0.86	2.67	4.59	1.52
gene18196	RAB39A	RAB39A, member RAS oncogene family	2.38	1.31	3.02	0.93	0.3	0.64	4.39	2.45	7.89
gene182	FBXL15	F-box and leucine-rich repeat protein 15	12.91	11.39	12.2	9.1	7.38	6.9	18.75	23.5	14.55
gene18293	GKN2	gastrokine 2	29.54	17.81	55.03	7.38	3.34	1.06	132.98	48.32	47.21
gene18356	DIP2B	disco-interacting protein 2 homolog B	24	19.97	14.84	7.41	14.14	13.77	21.77	31.9	28.14
gene18365	ATG101	autophagy related 101	51.85	43.71	57.11	37.23	31.67	27.3	117.88	159.66	57.81
gene184	NFKB2	nuclear factor of kappa light polypeptide gene enhancer in B-cells 2 (p49/p100)	16.23	15.03	12.36	4.75	4.53	5.46	18.2	28.77	27.85
gene18460	C1S	complement component 1, s subcomponent, transcript variant X3	140.58	55.24	256.67	74.87	140.53	120.85	365.83	348.58	172.69
gene18524	GPATCH3	G patch domain containing 3	12.02	9.87	10.97	7.24	7.82	9.26	13.57	24.91	11.23
gene18528	FAM46B	family with sequence similarity 46, member B	22.47	7.31	23.12	7.91	5.16	10.75	21.56	33.47	22.19
gene18536	MAP3K6	mitogen-activated protein kinase kinase kinase 6	22.34	10	19.66	2.91	14.61	17.86	32.66	42.15	13.95
gene18550	ELL	elongation factor RNA polymerase II, transcript variant X1	28.74	22.29	22.83	19.15	17.1	17.88	34.57	62.77	33.82
gene18593	LOC106047978	keratin, type I cytoskeletal 14-like	10.37	0	17.64	0.31	0	0.24	22.02	108.06	2.12
gene18597	LOC106048008	keratin, type I cytoskeletal 13-like, transcript variant X1	1.65	0	1.24	0	0.12	0.19	10.03	1.42	0.54
gene18620	LOC106048003	heat shock protein beta-11-like	74.81	92.02	346.28	3.62	11.34	72.6	3446.84	4516.41	1301.88
gene18623	LOC106047990	inactive phospholipase C-like protein 2	5.22	5.74	3.59	0.9	0.97	1.02	4.72	6.08	17.89
gene18676	LOC106048064	C-type lectin domain family 4 member D-like	17.77	14.69	9.27	3.9	5.07	5.68	17.18	25.89	23.15
gene18736	LOC106048128	uncharacterized LOC106048128	2.72	4.9	7.26	0.96	2.35	4.25	8.07	9.74	6.53
gene18743	FKBP4	FK506 binding protein 4, 59kDa	262.32	222.49	313.5	65.91	65.12	111.92	436.21	384.58	491.85
gene1880	GPR137B	G protein-coupled receptor 137B, transcript variant X1	46.7	29.88	53.08	23.85	22.17	28.49	85.37	75.41	69.9
gene18801	LOC106048219	uncharacterized LOC106048219	14.59	12.91	9.36	3.17	7.26	9.71	13.81	16.91	21.28
gene18828	EMB	embigin, transcript variant X1	3.29	2.28	2.47	0.99	1.82	2.15	3.1	4.04	5.21
gene18879	LOC106048282	acyl-coenzyme A amino acid N-acyltransferase 2-like	0.49	0.22	0.43	0.07	0.13	0.06	1.03	1.17	0.91
gene18985	NRTN	neurturin	3.64	0.84	1.44	0.47	0.69	0.71	2.62	5.2	2.8
gene19050	LOC106048485	uncharacterized LOC106048485	8.11	6.5	7.37	3.19	4.92	4.9	6.97	13.56	8.19
gene19051	MLLT6	myeloid/lymphoid or mixed-lineage leukemia; translocated to, 6	10.33	11.19	6.95	5.9	8.15	8.56	9.47	24.74	14.43
gene19064	KIAA0907	KIAA0907 ortholog	53.94	41.35	46.62	22.29	31.08	30.67	62.3	72.08	67.63
gene19106	FAM214B	family with sequence similarity 214, member B, transcript variant X19	10.19	8.02	13.43	6.35	6.68	9.3	16.2	18.63	12.85
gene19111	DNAJB5	DnaJ (Hsp40) homolog, subfamily B, member 5, transcript variant X1	4.75	6.02	4.77	4.04	2.64	4.48	9.54	12.75	9.85
gene19177	KIF17	kinesin family member 17	3.44	0.61	3.97	0.68	1.21	1.08	4.57	9.73	1.48
gene19180	EIF4G3	eukaryotic translation initiation factor 4 gamma, 3, transcript variant X1	25.84	20.13	20.02	16.28	16.65	21.09	30.02	47.56	36.37
gene19203	RCCD1	RCC1 domain containing 1	3.74	2.52	1.26	0.68	1.14	2.5	5.62	10.2	3.03
gene19208	SEMA4B	sema domain, immunoglobulin domain (Ig), transmembrane domain (TM) and short cytoplasmic domain, (semaphorin) 4B	5.8	2.23	6.58	1.57	1.67	1.98	12.1	28.55	7.82
gene19223	LOC106048674	prokineticin receptor 2	9.66	1.98	6.63	3.59	0.88	7.22	13.24	12.43	34.05
gene19237	LOC106048678	keratin, type II cytoskeletal 5-like	0.37	0.02	0.81	0	0.08	0.12	1.27	0.11	0.97
gene19243	LOC106048705	uncharacterized LOC106048705	0.16	0	0.2	0.04	0.04	0.04	0.86	6.14	0.18
gene19244	LOC106048702	keratin, type II cytoskeletal 5-like	0.4	0	0.94	0	0	0.06	2.18	29.97	0.08
gene19272	EPHB6	EPH receptor B6	0.51	0.31	1.33	0.16	0.6	0.23	1.14	1.07	0.78
gene19317	MST1R	macrophage stimulating 1 receptor	4.43	1.33	4.29	1.41	1.25	2.72	6.86	26.66	5.33
gene19319	RBM6	RNA binding motif protein 6	30.73	23.8	23.48	5.88	8.87	15.05	31.57	66.33	45.06
gene19323	SLC35B1	solute carrier family 35, member B1	11.27	12.28	11.19	7.14	7.2	8.05	18.05	19.87	17.54
gene19374	PCSK1	proprotein convertase subtilisin/kexin type 1	2.02	0.93	1.12	0.77	1.2	0.5	4.05	4.54	1.57
gene19495	RAB25	RAB25, member RAS oncogene family	3.68	0.44	1.48	0	0.79	0.24	5.62	2.26	3.47
gene19547	NAB2	NGFI-A binding protein 2 (EGR1 binding protein 2)	13.71	18.52	9.73	1.3	2.46	5.43	43.6	70.05	42.95
gene19572	LIF	leukemia inhibitory factor	6.73	5.23	4.67	3.56	2.53	1.72	8.68	20.93	8.73
gene19587	VPS45	vacuolar protein sorting 45 homolog (S. cerevisiae), transcript variant X1	31.54	29.29	31.59	18.02	17.56	21.79	28.85	48.47	40.45
gene19588	LOC106049066	uncharacterized LOC106049066	0.58	0.57	1.17	0.18	0.44	0.82	1.43	2.22	0.78
gene19675	CLDN19	claudin 19	2.44	2.18	1.15	0.19	1.25	0.36	2.68	4.53	1.76
gene19686	FOXN1	forkhead box N1, transcript variant X1	0.46	0	0.36	0.03	0	0.1	0.83	0.92	0.29
gene19694	TSR1	TSR1, 20S rRNA accumulation, homolog (S. cerevisiae)	27.01	28.21	28.76	12.77	16.12	17.37	27.97	59.18	44.15
gene1970	NANP	N-acetylneuraminic acid phosphatase	15.84	9.25	13.78	5.54	6.16	7.59	17.54	22.63	12.95
gene19709	SHISA5	shisa family member 5, transcript variant X2	83.59	81.52	66.98	45.74	48.34	51.34	120.82	91.02	123.83
gene19894	LOC106049387	small EDRK-rich factor 1-like	44	48.43	52.23	15.08	21.15	34.49	70.89	57.11	66.22
gene1990	TJAP1	tight junction associated protein 1 (peripheral), transcript variant X1	15.36	13.87	11.24	4.68	5.41	8.6	16.48	15.65	23.11
gene19905	EIF2B5	eukaryotic translation initiation factor 2B, subunit 5 epsilon, 82kDa	27.92	22.2	21.52	7.31	11.31	17.04	27.08	36.98	30.14
gene19909	LOC106049390	PHD finger protein 13-like	7.04	5.3	5.82	2.46	2.53	4.39	9.61	10.06	8.31
gene19987	LPAR2	lysophosphatidic acid receptor 2, transcript variant X2	4.21	4.29	5.95	3.85	3.48	4.04	13.9	6.02	5.21
gene20014	FGFR4	fibroblast growth factor receptor 4	1	0.49	0.5	0.06	0	0.29	1.17	1.87	1.76
gene20035	CLIC2	chloride intracellular channel 2	335.34	312.23	306	139.76	144.04	208.24	471.73	843.95	395.8
gene20043	LOC106049538	HEPACAM family member 2-like	4.84	3.39	3.55	0.48	0.87	1.01	9.68	12.4	11.5
gene20046	SLC35E4	solute carrier family 35, member E4	9.19	4.24	13.4	5.62	5.94	4.46	46.51	37.62	8.02
gene20068	KRT20	keratin 20, type I	0.65	0	1.19	0	0.07	0	0.89	9.97	0.59
gene20082	VDR	vitamin D (1,25- dihydroxyvitamin D3) receptor	7.89	8.28	7.53	6.3	3.25	3.68	13.7	32.38	22.25
gene20084	COL2A1	collagen, type II, alpha 1	0.48	0.8	1.01	0.21	0.05	0.79	1.6	4.14	2.06
gene20201	TNFRSF10B	tumor necrosis factor receptor superfamily, member 10b, transcript variant X1	9.02	12.38	10.71	4.33	6.86	5.72	25.57	23.74	12.66
gene20213	IL1B	interleukin 1, beta	0.31	0.16	0.09	0	0.09	0.09	0.49	6.23	0.3
gene20236	INSRR	insulin receptor-related receptor	0.85	1.12	0.35	0	0.21	0.26	1.35	3.72	3.14
gene20296	CDC42EP2	CDC42 effector protein (Rho GTPase binding) 2	60.45	69.42	79.71	36.82	48.69	51.94	154.9	165.52	92.87
gene20306	LOC106049813	cell adhesion molecule 3-like, transcript variant X1	14.23	11.26	5.02	4.64	2.66	3.47	10.02	29.89	54.86
gene20307	LOC106049814	uncharacterized LOC106049814, transcript variant X1	14.15	15.46	4.22	4.15	1.48	4.37	8.15	25.29	41.84
gene20308	LOC106049812	uncharacterized LOC106049812	18.47	16.99	22.26	10.7	9.9	17.88	19.41	62.38	27.81
gene2031	KCNK5	potassium channel, two pore domain subfamily K, member 5	12.82	7.57	6.7	4.43	6.6	5.76	19.13	25.24	14.96
gene20318	R3HDM2	R3H domain containing 2	28.53	26.89	24.61	11.34	18.83	16.94	29.13	42.76	46.25
gene20321	TUFT1	tuftelin 1	27.01	13.3	25.42	12.28	16.01	12.66	38.52	55.81	20.04
gene20335	LOC106049856	uncharacterized LOC106049856	29.23	12.73	29.14	10.43	16.88	11.56	30.88	39.79	24.6
gene20337	LOC106049848	class I histocompatibility antigen, F10 alpha chain-like	2829.51	994.15	2399.25	1209.19	1195.8	818.77	4142.94	2869.92	3037.42
gene20396	LOC106049916	Ig heavy chain V region 914-like	360.5	469.52	115.64	50.12	24.36	33.61	69.65	110.69	2484.44
gene20397	LOC106049912	uncharacterized LOC106049912	297.31	761.85	213.43	21.77	28.03	29.74	141.67	479.37	3100.58
gene20398	LOC106049913	Ig mu chain C region-like	90.28	235.35	74.57	16.4	23.02	32.13	278.03	189.49	582.93
gene20399	LOC106049914	Ig mu chain C region membrane-bound form-like	15.18	22.05	3.44	4.28	4.18	11.66	80.72	12.12	35.48
gene20457	LOC106029319	proto-oncogene Mas-like	0.49	0.67	0.51	0.04	0.27	0.23	1.65	12.63	1.99
gene20460	KDM2A	lysine (K)-specific demethylase 2A, transcript variant X1	28.47	21.23	21.8	9.48	9.63	16.85	23.41	46.31	30.19
gene20509	HPX	hemopexin	1.94	1.01	2.38	0.62	0.43	1.34	3.05	2.59	6.36
gene20533	LOC106029389	uncharacterized LOC106029389	6.89	7.33	9.89	1.4	7.21	4.04	9.92	14.73	12.38
gene20548	LOC106029404	toll-like receptor 13	6.34	6.37	4.14	1.42	1.03	1.51	5.46	12.64	24.74
gene20569	LOC106029425	endogenous retrovirus group K member 18 Pol protein-like	108.76	112.67	51.44	39.72	73.24	58.37	115.56	141.64	175.16
gene20587	GDF15	growth differentiation factor 15	1.22	1.62	1.58	0.4	0.38	0.62	7.38	13.33	1.39
gene20599	LOC106029457	interferon-induced guanylate-binding protein 1-like	4.17	0.33	4.02	0.32	0.33	0.76	59.18	81.7	6.7
gene20633	LOC106029495	mucin-3B-like	52.88	49.98	30.1	14.08	23.22	28.91	75.01	106.31	125.41
gene20740	CLCF1	cardiotrophin-like cytokine factor 1	1.01	1.34	1.68	0.55	0.26	0.95	5.15	15.55	1.91
gene20848	LOC106029722	bromodomain-containing protein 2-like	149.49	91.05	140.22	50.22	48.97	73.21	216.54	284.72	188.87
gene2114	MUC13	mucin 13, cell surface associated, transcript variant X1	0.14	0.14	0.3	0.02	0.09	0.07	0.42	0.53	0.23
gene2158	GCG	glucagon	1.3	0	2.9	0	0.95	0.72	4.35	2.21	2.52
gene226	PAPSS2	3'-phosphoadenosine 5'-phosphosulfate synthase 2	4.53	6.92	3.74	1.92	2.04	3.45	11.13	19.26	10.32
gene230	ASAH2	N-acylsphingosine amidohydrolase (non-lysosomal ceramidase) 2	0.08	0.07	0.08	0	0.04	0	0.61	1.14	0.79
gene2336	LOC106030093	uncharacterized LOC106030093	0.1	0.27	0.24	0	0.03	0.17	0.48	0.63	0.41
gene25	PPRC1	peroxisome proliferator-activated receptor gamma, coactivator-related 1	6.52	5.22	5.11	1.86	1.97	3.18	7.76	16.98	6.11
gene2650	FAM83B	family with sequence similarity 83, member B	1.85	0.03	1.79	0.49	0.11	0.13	1.89	3.37	1.5
gene2765	RIPK2	receptor-interacting serine-threonine kinase 2	13.71	11.94	14.82	6.96	8.88	10.74	21.11	21.88	17.19
gene287	LOC106030811	chromosome unknown open reading frame, human C10orf54, transcript variant X1	54.84	54.43	39.62	16.69	31.31	35.45	79.58	91.25	79.01
gene290	CHST3	carbohydrate (chondroitin 6) sulfotransferase 3	4.34	5.95	6.33	2.48	2.86	3.67	14.17	12.06	7.39
gene2955	TRIB2	tribbles pseudokinase 2	34.94	34.55	31.81	20.59	17.49	22.98	80.95	108.25	75.74
gene2984	LOC106030817	cytosolic 5'-nucleotidase 1B-like	66.72	39.07	70.57	35.35	52.38	52.78	93.8	156.54	58.46
gene3097	PTPRO	protein tyrosine phosphatase, receptor type, O, transcript variant X1	4.72	1.47	3.68	2.16	1.08	1.68	10.27	10.08	3.97
gene3159	FAM60A	family with sequence similarity 60, member A, transcript variant X2	10.42	12.35	8.21	3.55	2.01	3.97	10.47	21.82	18.29
gene3187	PTN	pleiotrophin	15.79	8.17	11.54	8.38	7.89	5.11	17.7	51.25	15.21
gene3192	KIAA1147	KIAA1147 ortholog, transcript variant X1	9.8	6.89	5.53	6.41	5.53	6.26	9.72	13.75	13.31
gene3205	RAB19	RAB19, member RAS oncogene family	4.85	4.48	4.02	3	2.04	3.01	8.92	11.46	5.52
gene3255	TRPV4	transient receptor potential cation channel, subfamily V, member 4	4.27	4.96	5.12	1.36	2.62	3.13	5.47	9.86	4.14
gene3279	FICD	FIC domain containing	8.87	9.6	9.27	5.41	6.37	5.04	17.69	19.42	16.69
gene3299	SH2B3	SH2B adaptor protein 3	8.75	7.4	4.64	4.7	4.61	7.52	12.58	14.26	10.17
gene3321	LRRC43	leucine rich repeat containing 43, transcript variant X5	3.8	0.75	2.23	0.88	1.57	2.37	7.59	3.67	3.15
gene3348	LOC106031415	sarcoplasmic/endoplasmic reticulum calcium ATPase 2	56.86	43.26	37.91	25.11	24.42	46.49	66.72	120.59	75.75
gene3356	ABCB9	ATP-binding cassette, sub-family B (MDR/TAP), member 9	4.24	4.91	3.87	1.98	3.24	2.77	5.09	14.38	4.78
gene3375	DNAH10	dynein, axonemal, heavy chain 10	0.28	0.17	0.16	0.05	0.08	0.15	0.32	0.21	0.34
gene3390	TMEM132B	transmembrane protein 132B	0.99	0.6	0.64	0.26	0.35	0.21	0.9	1.13	2.84
gene3414	ULK1	unc-51 like autophagy activating kinase 1	9.31	5.43	5.56	2.96	4.03	5.64	8.26	17.18	9.03
gene3434	PGAM5	phosphoglycerate mutase family member 5, transcript variant X1	19.88	21.56	20.46	9.62	9.11	14.05	27.9	29.16	22.09
gene3468	SDF2L1	stromal cell-derived factor 2-like 1	75.76	96.46	93.64	48.86	51.14	73.07	131.61	151.51	148.85
gene3538	PISD	phosphatidylserine decarboxylase, transcript variant X1	27.55	27.53	21.05	17.72	21.91	14.71	30.5	66	40.06
gene3545	LIMK2	LIM domain kinase 2	15.45	16.64	16.56	9.24	11.21	11.28	19.28	36.68	29.52
gene3559	LOC106031352	dynein light chain 1, cytoplasmic-like	19.58	26.09	29.97	6.61	3.87	5.84	37.98	45.6	51.85
gene3578	HSPB8	heat shock 22kDa protein 8	12.86	8.22	23.02	3.83	4.69	10	63.27	82.23	32.89
gene3579	SRRM4	serine/arginine repetitive matrix 4	1.31	0.27	0.71	0.37	0.77	0.2	1.5	2.51	0.82
gene3608	SLC3A1	solute carrier family 3 (amino acid transporter heavy chain), member 1, transcript variant X1	1.91	2.67	1.35	0.72	1.92	1.28	4.09	3.35	6.82
gene3679	LOC106031534	uncharacterized LOC106031534, transcript variant X2	0.05	0.22	0.15	0.02	0.05	0.06	0.13	0.36	0.4
gene3709	DUSP10	dual specificity phosphatase 10, transcript variant X2	26.06	18.87	16.34	9.04	12.27	11.16	18.86	27.44	40.38
gene3739	FLVCR1	feline leukemia virus subgroup C cellular receptor 1	10.61	8.48	9.62	3.25	3.37	6.1	12.93	21.27	11.68
gene3752	ITPKB	inositol-trisphosphate 3-kinase B	59.64	43.05	35.24	30.46	29.94	38.63	62.21	91.97	59.57
gene3758	LOC106031598	uncharacterized LOC106031598	1.88	1.81	1.02	0.4	1.09	1.92	2.52	4.97	2.22
gene3774	SLC10A1	solute carrier family 10 (sodium/bile acid cotransporter), member 1, transcript variant X2	0.12	0.17	0.12	0	0	0.05	0.39	0.37	0.2
gene3789	ZFP36L1	ZFP36 ring finger protein-like 1	248.01	236.94	228.2	131.56	195.88	132.98	381.17	678.47	605.69
gene3800	ARG2	arginase 2	32.41	10.8	18.78	8.19	4.56	5.31	30.73	73.16	31.31
gene3857	PRKD1	protein kinase D1	16.47	15.14	14.41	6.74	8.16	10.28	16.68	22.52	18.75
gene3886	LOC106031755	uncharacterized LOC106031755	3.74	1.46	2.51	0.79	1.14	0.95	4.84	4.87	2.56
gene3922	LOC106031806	G-protein coupled receptor 183-like	29.86	28.53	13.49	11.28	13.29	12.68	26.51	32.26	63.74
gene3938	LOC106031819	uncharacterized LOC106031819	0.86	0.54	0.4	0.32	0	0.23	1.47	0.68	0.85
gene4014	DUSP5	dual specificity phosphatase 5	6.11	8.26	12.7	2.49	2.76	1.14	32.85	66.78	37.21
gene4023	LOC106031885	uncharacterized LOC106031885	1.91	1.56	0.94	0.31	0.67	0.71	1.03	4.14	2.62
gene4096	SLC7A14	solute carrier family 7, member 14	0.15	0.03	0.18	0.02	0.02	0	0.2	0.95	0.08
gene4154	B3GNT5	UDP-GlcNAc:betaGal beta-1,3-N-acetylglucosaminyltransferase 5, transcript variant X3	18.43	16.55	15.56	6.7	5.83	11	20.42	21.42	29.2
gene4179	AMZ1	archaelysin family metallopeptidase 1	1.87	0.49	1.02	0.13	0.17	0.61	1.6	2.14	3.56
gene4218	MAP2K3	mitogen-activated protein kinase kinase 3	15.22	12.75	13.32	7.78	7.81	8.39	10.99	28.07	24.2
gene423	TMEM254	transmembrane protein 254	64.5	30.07	94.55	19.46	15.27	18.52	110.84	172.02	55.22
gene4339	TMEM154	transmembrane protein 154, transcript variant X1	7.05	6.79	4.33	1.48	2.57	2.34	6.07	9.52	12.05
gene4565	TNFAIP3	tumor necrosis factor, alpha-induced protein 3, transcript variant X1	23.8	21.56	19.95	16.29	19.57	12.49	24.11	54.11	53.58
gene4637	FOXO3	forkhead box O3	47.13	20.65	25.56	20.49	18.91	21.13	40.47	70.14	38.14
gene465	PLAU	plasminogen activator, urokinase	20.61	9.27	18.23	6.36	7.32	5.56	15.47	92.02	15.22
gene4693	EGR1	early growth response 1	24.84	40.11	25.65	16.47	14.72	19.03	144.53	137.02	87.05
gene471	LOC106033192	neurotrypsin-like, transcript variant X2	3.1	2.28	2.24	0.72	2.18	3.01	3.47	6.13	4.97
gene4734	HSPA4	heat shock 70kDa protein 4	56.52	61.98	67.8	30.18	44.75	56.63	86.25	103.41	113.52
gene4749	IRF1	interferon regulatory factor 1, transcript variant X2	106.48	83.53	105.32	42.63	59.1	37.18	160.78	184.93	137.65
gene4787	PITX1	paired-like homeodomain 1	1.5	0	3.9	0	0.32	0.46	3.72	7.3	0.52
gene4859	MYOZ3	myozenin 3	2.54	2.4	1.46	1.27	1.55	1.14	4.98	3.82	5.45
gene4865	LOC106032831	uncharacterized LOC106032831, transcript variant X1	0.33	0.27	0.2	0.16	0.11	0.06	0.67	0.53	0.91
gene4910	ADAM19	ADAM metallopeptidase domain 19	4.18	2.58	4.91	1.34	1.9	1.59	4.51	13.5	8.02
gene4924	LOC106032659	ovomucoid-like, transcript variant X3	1.54	0	0.12	0	0.41	0.24	8.42	0.76	2.38
gene4930	HRH2	histamine receptor H2, transcript variant X1	15.35	6.02	8.38	2.83	3.87	7.56	4.43	30.36	13.39
gene501	REEP1	receptor accessory protein 1, transcript variant X4	13.37	23	15.85	9.74	8.73	14.09	27.93	33.87	16.79
gene5098	ZSWIM5	zinc finger, SWIM-type containing 5, transcript variant X1	11.8	7.59	7.46	3.73	6.4	9.19	16	26.07	12.23
gene5106	PLK3	polo-like kinase 3	8.33	6.85	8.31	3.89	5.29	3.58	35.26	56.39	18.41
gene5164	FAM65A	family with sequence similarity 65, member A	46.82	41.36	50.06	23.64	27.38	29.11	43.68	95.92	41.45
gene5181	RANBP10	RAN binding protein 10	7.25	5.49	6.12	3.6	3.72	6.77	7.92	12.19	8.45
gene5182	LOC106033293	C-C motif chemokine 4-like	20.27	6.36	1.43	7.56	1.09	0.4	11.69	6.76	39.21
gene5194	HERPUD1	homocysteine-inducible, endoplasmic reticulum stress-inducible, ubiquitin-like domain member 1	50.21	60.03	45.44	26.4	27.68	20.99	173.08	145.13	116.91
gene5195	PARD6A	par-6 family cell polarity regulator alpha	0.69	0.75	0.69	0.5	0.32	0.31	1.28	2.67	1.74
gene5199	LOC106033201	uncharacterized LOC106033201	7.3	7.08	5.84	3.8	2.54	3.58	8.44	15.29	22
gene52	ENTPD7	ectonucleoside triphosphate diphosphohydrolase 7	10.82	16.55	11.3	6.51	5.63	9.38	12.21	20.33	15.4
gene5231	RHPN2	rhophilin, Rho GTPase binding protein 2	1.76	0.85	1.21	0.38	0.69	0.62	2.39	2.32	1.21
gene5330	NTN3	netrin 3	1.46	1.32	2.65	0.98	0.45	0.52	1.94	7.07	1.38
gene5401	GSG1L	GSG1-like, transcript variant X1	0.32	0.46	0.49	0.04	0.24	0.08	0.59	3.06	0.68
gene5442	CLEC19A	C-type lectin domain family 19, member A	0.57	0	0.76	0	0.4	0	9.26	5.19	0
gene5476	VWA3A	von Willebrand factor A domain containing 3A, transcript variant X2	0.87	0.61	0.37	0.23	0.55	0.49	0.91	1.09	0.8
gene548	TNIP2	TNFAIP3 interacting protein 2	6.65	5.44	5.63	2.88	3.96	3.77	9.96	28.46	18.15
gene5527	LOC106033532	cytochrome P450 2W1-like	0.56	0.41	0.33	0.04	0.2	0.37	0.95	0.84	0.75
gene5537	TMEM184A	transmembrane protein 184A, transcript variant X2	0.13	0.32	0.29	0.1	0.07	0.07	0.68	0.65	0.26
gene5643	ADAM10	ADAM metallopeptidase domain 10	59.79	49.5	46.59	18.95	27.2	45.32	55.12	64.62	71.89
gene5716	DNAJA4	DnaJ (Hsp40) homolog, subfamily A, member 4	38.35	25.77	30.97	3.36	4.43	10.77	180.94	94.31	152.38
gene5733	SERPING1	serpin peptidase inhibitor, clade G (C1 inhibitor), member 1	12.14	5.53	15.05	4.97	6.28	3.28	36.02	28.87	16.21
gene5814	PRRG4	proline rich Gla (G-carboxyglutamic acid) 4 (transmembrane)	1.86	0.36	2.36	0.16	0.34	0.28	1.97	6.05	1.92
gene5863	LOC106033854	vitamin D 25-hydroxylase	3.66	2.58	3.15	1.19	1.5	2.67	5.15	4.43	3.77
gene591	LOC106035038	uncharacterized LOC106035038, transcript variant X1	3.4	3.11	1.86	0.26	0.43	0.71	6.28	5.83	5.74
gene5923	LOC106033995	uricase-like	1.23	0.06	0.07	0	0.08	0.08	0.66	1.22	1.15
gene5965	LRRC8D	leucine rich repeat containing 8 family, member D, transcript variant X2	31.91	18.89	23.22	11.25	16.14	15.46	30.75	81.09	32.96
gene5990	PTGS2	prostaglandin-endoperoxide synthase 2 (prostaglandin G/H synthase and cyclooxygenase), transcript variant X2	3.87	1.19	3.3	2.12	1.11	0.71	5.68	15.29	2.38
gene6037	ENDOD1	endonuclease domain containing 1	10.91	7.54	12.67	6.23	6.87	6.34	26.11	41.95	13.71
gene6054	LOC106034174	uncharacterized LOC106034174	4.51	1.9	3.31	1.12	1.96	0.91	9.62	11.35	10.48
gene6057	SMCO4	single-pass membrane protein with coiled-coil domains 4, transcript variant X2	23.7	17.7	32.38	13.29	10.94	14.37	45.38	25.16	30.92
gene6058	CCDC67	coiled-coil domain containing 67, transcript variant X1	0.59	0.62	1.08	0.29	0.22	0	2.62	0.95	1.88
gene6068	CHORDC1	cysteine and histidine-rich domain (CHORD) containing 1	22.56	15.63	15.47	5.76	7.7	9.36	41.03	24.63	49.82
gene6097	ZC3H12D	zinc finger CCCH-type containing 12D	4.63	2.91	2.29	0.68	1.03	1.3	6.71	15.31	13.2
gene6132	IPCEF1	interaction protein for cytohesin exchange factors 1, transcript variant X3	9.7	4.77	4.26	3.04	2.77	3.11	7.58	9.25	14.63
gene6275	ARHGEF37	Rho guanine nucleotide exchange factor (GEF) 37, transcript variant X1	1.61	0.74	2.22	0.34	0.35	0.52	3.13	6.1	1.02
gene6326	ACKR3	atypical chemokine receptor 3, transcript variant X1	83.32	131.74	185.65	83.9	80.84	148.61	279.59	252.84	141.02
gene6334	LRRFIP1	leucine rich repeat (in FLII) interacting protein 1	58.48	57.69	46.34	18.84	25.87	48.87	61.39	120.79	101.38
gene6335	LOC106034499	uncharacterized LOC106034499	2.72	1.83	1.19	0.29	0.48	1.22	3.25	4.16	5.13
gene6434	LOC106034743	uncharacterized LOC106034743	0.78	0.24	0.44	0.18	0.11	0.34	0.61	1.64	0.5
gene6455	GNA13	guanine nucleotide binding protein (G protein), alpha 13	42.14	32.18	25.48	22.43	24.56	21.04	52.85	52.24	74.93
gene6456	RGS9	regulator of G-protein signaling 9, transcript variant X1	19.36	11.25	8.26	3.75	5.89	5.76	13.45	12.12	33.33
gene6488	ERN1	endoplasmic reticulum to nucleus signaling 1	16.31	11.36	11.64	7.79	12.25	11.95	15.31	27.31	24.5
gene6506	RAB11FIP4	RAB11 family interacting protein 4 (class II), transcript variant X1	3.99	3.39	3.32	1.89	2.14	2.42	4.59	7.68	4.91
gene6524	TOM1L1	target of myb1 like 1 membrane trafficking protein, transcript variant X3	3.12	2.58	4.62	1.34	2.24	1.67	6.78	6.17	3.45
gene6551	LOC106034664	uncharacterized LOC106034664	20.77	36.19	8.62	6.18	1.9	2.35	29.61	71.34	54.43
gene6640	JMJD6	jumonji domain containing 6	51.02	38.56	32.21	8.9	11.92	12.68	66.46	68.85	97.67
gene6659	TFAP2A	transcription factor AP-2 alpha (activating enhancer binding protein 2 alpha)	6.95	1.03	7.73	1.39	0.85	1.22	8.52	20.38	4.17
gene6777	SLMO1	slowmo homolog 1 (Drosophila), transcript variant X1	14.76	13.5	15.42	5.56	8.92	9.4	40.1	59.7	27.93
gene679	PPARGC1A	peroxisome proliferator-activated receptor gamma, coactivator 1 alpha, transcript variant X1	0.51	0.06	0.72	0.3	0.13	0.22	0.63	1.38	0.33
gene6921	CDKL2	cyclin-dependent kinase-like 2 (CDC2-related kinase), transcript variant X1	1.09	1.57	2.04	0.53	1.32	0.72	4.53	2.83	3.11
gene7060	SNX31	sorting nexin 31	0.72	0.13	1.01	0.08	0.3	0.6	1.86	2.03	1.31
gene7076	KLF10	Kruppel-like factor 10, transcript variant X2	38.7	24.78	39.83	24.35	22.02	25.37	71.93	78.11	38.37
gene7082	SLC25A32	solute carrier family 25 (mitochondrial folate carrier), member 32, transcript variant X2	7.3	6.93	6.44	4.48	3.14	4.88	8.62	9.4	10.12
gene711	SLC25A47	solute carrier family 25, member 47	0.44	0.74	0.8	0.13	0.08	0.25	1.42	0.72	1.71
gene712	SLC25A29	solute carrier family 25 (mitochondrial carnitine/acylcarnitine carrier), member 29, transcript variant X3	36.64	32.25	31.29	12.68	13.25	15.93	47.89	81.91	41.38
gene717	LOC106036078	extracellular tyrosine-protein kinase PKDCC-like	9.1	3.95	4.76	4.39	1.94	3.8	12.16	15.14	6.49
gene7174	MDN1	midasin AAA ATPase 1	15.35	14.37	8.09	3.68	5.7	11.69	10.77	19.04	18.35
gene7177	BACH2	BTB and CNC homology 1, basic leucine zipper transcription factor 2, transcript variant X1	5.4	4.91	3.44	2.13	3.36	4.63	6.01	9.42	7.48
gene7254	LMOD3	leiomodin 3 (fetal)	0.11	0.22	0.21	0.11	0.07	0.07	1.48	0.98	0.32
gene7272	SHQ1	SHQ1, H/ACA ribonucleoprotein assembly factor, transcript variant X1	4.99	4.4	3.97	1.8	1.87	2.54	6.78	10.05	7.51
gene7274	PPP4R2	protein phosphatase 4, regulatory subunit 2	52.87	41.19	43.44	9.06	13.72	20.61	65.36	70.92	76.27
gene7346	ITGA2	integrin, alpha 2 (CD49B, alpha 2 subunit of VLA-2 receptor)	3.57	1.43	2.56	0.62	0.66	1.36	3.16	5.74	3.13
gene7378	IL31RA	interleukin 31 receptor A, transcript variant X1	8.21	3.71	5.73	1.06	2.16	4.41	8.79	23.3	8.29
gene7387	GPBP1	GC-rich promoter binding protein 1, transcript variant X2	60.74	51.52	58.23	29.41	33.26	38.88	93.92	69.06	79.11
gene7438	LOC106035746	lysozyme g, transcript variant X2	34.71	43.92	19.32	4.64	8.39	11.56	34.06	98.45	83.5
gene7455	ATP10A	ATPase, class V, type 10A, transcript variant X1	13.21	12.56	18.26	6.3	6.42	6.35	30.37	40.14	15.29
gene7473	JADE3	jade family PHD finger 3, transcript variant X1	20.25	16.19	21.72	15.33	14.13	12.18	33.02	28.08	30.22
gene7498	ZBED1	zinc finger, BED-type containing 1	14.65	14.15	14.39	7.8	13.57	5.43	35.04	35.1	21.02
gene7523	PAH	phenylalanine hydroxylase	3.65	1.34	6.38	0.18	0.48	1.68	12.49	3.07	11.01
gene7599	LOC106035885	cytokine receptor common subunit beta-like	52.98	45.47	48.29	26.61	25.05	33.77	70.26	69.04	91.36
gene7615	CARD10	caspase recruitment domain family, member 10	4.18	1.1	2.31	1.13	1.71	1.66	6.05	8.96	1.92
gene7624	NOL12	nucleolar protein 12	36.63	29.82	38.37	17.82	18.15	24.03	26.21	71.56	42.55
gene7635	SOX10	SRY (sex determining region Y)-box 10	1.77	0.71	1	0.24	0.57	1.3	1.46	9.27	0.95
gene765	DDX24	DEAD (Asp-Glu-Ala-Asp) box helicase 24	22.41	16.37	16.12	10.14	8.89	12.07	21.55	36.52	21.71
gene7661	ATF4	activating transcription factor 4	807.52	780.49	823.37	516.84	459.78	451.63	1572.75	1481.15	824.77
gene777	CHGA	chromogranin A	2.31	0.58	1.73	0.23	0	0.37	0.48	13.94	1.8
gene7777	LOC106036118	uncharacterized LOC106036118, transcript variant X1	8.65	6.04	17.35	3.29	5.69	5.58	33.51	70.18	13.06
gene7779	ICOSLG	inducible T-cell co-stimulator ligand	23.4	13.3	18.17	10.45	9.65	11.7	15.13	19.92	38.72
gene7782	PWP2	PWP2 periodic tryptophan protein homolog (yeast)	20.42	18.28	15	9.28	12.09	15.2	23.07	39.36	21.38
gene7841	ETS2	v-ets avian erythroblastosis virus E26 oncogene homolog 2	36.88	23.69	34.1	18.14	21.35	25.48	50.77	104.85	36.85
gene7955	AP1S3	adaptor-related protein complex 1, sigma 3 subunit	1.52	1.17	1.19	0.28	0.3	0.66	1.24	3.65	1.4
gene8056	PMAIP1	phorbol-12-myristate-13-acetate-induced protein 1	17.18	12.68	12.55	6.14	5.77	6.06	15.68	13.07	38.38
gene8067	LOC106036392	avidin-like	0.48	0.42	0.55	0	0.07	0.21	0.99	1.84	2.17
gene8070	LOC106036308	avidin-like	0.29	0.09	0.19	0	0	0.2	1.61	1.95	0.88
gene8083	LOC106036319	uncharacterized LOC106036319	30.18	8.69	15.96	8.13	10.15	11.79	37.87	26.73	16.88
gene8100	AEN	apoptosis enhancing nuclease	23.16	19.67	22.52	13.28	10.61	8.81	57.08	52.85	23.3
gene8132	MCTP2	multiple C2 domains, transmembrane 2, transcript variant X4	7.24	4.44	5.81	3.46	4.67	4.71	8.49	17.96	6.51
gene8134	LOC106036504	uncharacterized LOC106036504	0.51	0.33	0.78	0.22	0.17	0.34	0.77	0.85	0.83
gene8212	UPP1	uridine phosphorylase 1, transcript variant X2	6.32	6.48	7.91	2.83	3.22	3.75	7.62	29.48	5.03
gene8228	CCT5	chaperonin containing TCP1, subunit 5 (epsilon)	183.96	157.78	165.66	101.73	88.32	102.53	207.97	238.22	220.94
gene829	GALC	galactosylceramidase	12.42	9.43	8.53	2.92	6.56	8.63	10.27	14.15	24.8
gene8301	CCT4	chaperonin containing TCP1, subunit 4 (delta)	166.69	148.52	166.78	91.12	85.03	94.76	218.92	259.34	244.98
gene8487	OXSR1	oxidative stress responsive 1	31.88	26.29	26.07	20.01	20.11	21.64	48.06	54.61	43.25
gene8494	CSRNP1	cysteine-serine-rich nuclear protein 1	29.01	19.92	24.21	18.33	13.43	12.94	42.65	118.74	60.14
gene8541	BTG1	B-cell translocation gene 1, anti-proliferative	683.89	536.35	649.81	302.91	323.45	274.25	718.16	899.84	885.41
gene8549	PLXNC1	plexin C1	45.29	38.08	23.12	13.26	18.23	23.05	47.29	29.19	67.05
gene8583	LOC106036974	uncharacterized LOC106036974	1.34	0.26	1.06	0.25	0.71	0.84	2.12	1.57	1.33
gene8589	GAS2L3	growth arrest-specific 2 like 3, transcript variant X5	3.75	1.86	2.69	0.77	1.17	1.07	2.75	4.19	6.04
gene8608	CXADR	coxsackie virus and adenovirus receptor	4.04	2.04	7.93	3.72	2.12	1.87	9.64	10	5.52
gene8639	ADAMTS1	ADAM metallopeptidase with thrombospondin type 1 motif, 1	49.7	68.75	66.39	30.31	22.87	75.16	109.61	257.91	90.93
gene8653	SLC25A25	solute carrier family 25 (mitochondrial carrier; phosphate carrier), member 25, transcript variant X1	26	29.58	19.02	15.96	17.65	17.1	35.68	51.28	30.83
gene8665	BRINP1	bone morphogenetic protein/retinoic acid inducible neural-specific 1, transcript variant X1	0.29	0.1	0.38	0.14	0.07	0.04	0.21	2.06	0.32
gene8686	ATP6V1G1	ATPase, H+ transporting, lysosomal 13kDa, V1 subunit G1	123.56	104.15	87.81	60.94	52.97	57.95	171.26	139.29	127.64
gene8699	LOC106037090	P2Y purinoceptor 2-like	0.46	0.29	0.6	0.25	0.14	0.38	1.18	1.08	0.83
gene8701	LOC106037092	ectonucleoside triphosphate diphosphohydrolase 2-like, transcript variant X1	12.47	4.43	5.95	4.24	4	3.68	7.84	8.48	16.75
gene8705	TOR4A	torsin family 4, member A, transcript variant X3	26.71	11.93	22.39	9.87	8.22	7.56	21.22	40.42	27.35
gene8753	LOC106037140	POU domain, class 3, transcription factor 3-like, transcript variant X1	15.12	11.34	12.65	4.21	4.57	2.61	24.92	25.86	16.74
gene8781	LOC106037230	uncharacterized LOC106037230	0.13	0.16	0.22	0.04	0.08	0.05	0.23	0.67	0.16
gene8803	PRKCH	protein kinase C, eta	6.4	3.8	4.29	2.84	2.35	1.47	7.34	11.37	4.83
gene8900	PSTPIP2	proline-serine-threonine phosphatase interacting protein 2	15.89	8.03	7.53	3.73	4.71	7.32	21.89	24.33	13.04
gene8924	LIPG	lipase, endothelial	6.39	7.05	4.69	1.52	1.84	2.36	4.93	23.21	19.67
gene8930	LOC106037337	tetraspanin-3-like, transcript variant X1	29.09	26.47	18.8	18.34	19.77	12.12	27.11	47.1	60.13
gene8937	MEX3C	mex-3 RNA binding family member C, transcript variant X1	29.01	29.09	26.33	9.85	11.91	13.87	40.2	45.54	41.85
gene9028	IL13RA2	interleukin 13 receptor, alpha 2, transcript variant X1	1.53	1.37	0.98	0.72	0.27	0.83	1.7	3.48	2.24
gene9035	LOC106037398	serine protease 23-like	1.08	1.57	1.23	0.25	0.63	0.81	3.53	4.27	1.52
gene9036	SLC7A3	solute carrier family 7 (cationic amino acid transporter, y+ system), member 3	16.68	25.33	16.51	9.78	12.15	12.75	54.12	103.55	42.37
gene9085	ASNS	asparagine synthetase (glutamine-hydrolyzing)	24.78	31.86	25.79	12.14	14.87	23.64	49.46	53.61	39.21
gene9086	TAC1	tachykinin, precursor 1	2.23	0.51	8.75	0.08	1.19	0.37	4	68.12	3.82
gene9137	TTC39C	tetratricopeptide repeat domain 39C, transcript variant X1	5.25	4.06	3.89	3.77	3.45	2.91	6.43	5.44	9.16
gene914	SLC19A2	solute carrier family 19 (thiamine transporter), member 2	5.09	2.55	4.07	1.57	1.52	2.29	12.81	8.92	3.57
gene9257	SLITRK2	SLIT and NTRK-like family, member 2	0.33	0.29	0.58	0.05	0.1	0.29	0.64	1.55	0.31
gene9275	GABRE	gamma-aminobutyric acid (GABA) A receptor, epsilon, transcript variant X1	0.96	0.31	1.58	0.74	0.16	0.35	2.46	15.59	1.41
gene9300	TMEM35	transmembrane protein 35	20.4	24.53	23.25	10.8	5	7.57	51.84	28.71	38.65
gene9371	SMS	spermine synthase, transcript variant X2	29	22	25.27	14.72	11.47	15.33	37.88	27.7	30.06
gene9410	RCAN3	RCAN family member 3	3.02	2.57	2.21	1.15	0.99	2.29	2.85	4.92	4.06
gene9430	MFSD2A	major facilitator superfamily domain containing 2A	16.66	17.01	19.08	6.93	7.79	4.96	52.51	141.86	24.73
gene9431	MYCL	v-myc avian myelocytomatosis viral oncogene lung carcinoma derived homolog	3.57	2.07	3.58	0.6	0.19	1.98	7.27	8.93	3.1
gene9447	FNDC5	fibronectin type III domain containing 5, transcript variant X1	1.74	1.72	1.92	0.68	2.01	0.26	3.96	3.46	2.66
gene9449	LOC106038077	uncharacterized LOC106038077	19.84	13.87	24.88	9.33	12.98	11.91	74.84	48.19	18.17
gene9519	STK40	serine/threonine kinase 40	43.23	37.21	39.18	17.48	20.32	21.32	78.83	165.24	68.41
gene9527	ZC3H12A	zinc finger CCCH-type containing 12A	14.5	13.79	12.35	7.63	11.5	8.1	20.58	28.39	15.58
gene9566	PDE12	phosphodiesterase 12	15.58	11.67	13.04	6.09	4.24	7.81	23.59	35.55	17.75
gene9570	FLNB	filamin B, beta, transcript variant X1	87.39	145.85	57.61	66.77	79.66	70.26	123.51	232.01	249.23
gene9626	LOC106038169	uncharacterized LOC106038169, transcript variant X1	0.02	0.04	0.09	0	0	0.05	0.18	0.27	0.21
gene9629	FZD3	frizzled class receptor 3, transcript variant X2	0.5	0.47	0.79	0.19	0.3	0.23	0.7	1.69	0.7
gene9673	PAQR8	progestin and adipoQ receptor family member VIII, transcript variant X5	5.58	5.48	2.95	2.7	3.25	2.83	8.44	9.09	12.33
gene9727	KCNJ8	potassium channel, inwardly rectifying subfamily J, member 8	71.65	55.18	76.86	20.05	20.27	56.81	51.39	151.37	85.04
gene9738	LOC106038247	uncharacterized LOC106038247, transcript variant X1	1.92	1.36	1.94	0.84	1.1	1.24	2.29	2.39	2.44
gene978	CBLB	Cbl proto-oncogene B, E3 ubiquitin protein ligase	11.8	8.45	4.78	2.66	4.09	3.84	9.83	16.31	16.43
gene9852	CDCP1	CUB domain containing protein 1	2.75	0.57	2.83	0.47	0.55	1.07	1.96	5.97	2.42
gene9948	MYC	v-myc avian myelocytomatosis viral oncogene homolog	31.58	23.28	26.15	7.93	12.92	13.44	68.04	150.03	64.01
gene9954	NSMCE2	non-SMC element 2, MMS21 homolog (S. cerevisiae)	46.49	29.78	43.08	29.15	24.66	31.59	69.91	113.84	39.73

## Sheet: 1profile
Gene.id	symbol	Gene_description	D1201	D1202	D1203	D3001	D3002	D3003	D701	D702	D703
gene10056	ACSL4	acyl-CoA synthetase long-chain family member 4, transcript variant X1	25.14	18.86	19.66	13.62	20.45	23.22	60.17	184.01	61.47
gene10076	TENM1	teneurin transmembrane protein 1, transcript variant X1	34.74	36.56	30.7	20.69	34.58	46.41	62.13	83.59	58.24
gene10169	LOC106038763	carboxypeptidase A2-like, transcript variant X1	0.28	0	0.56	0.15	0.07	0.29	6.87	0.31	1.58
gene10212	LOC106038726	uncharacterized LOC106038726, transcript variant X1	0.6	0.69	0.52	0.55	0.89	0.68	2.45	6.42	1.32
gene10247	BAZ1A	bromodomain adjacent to zinc finger domain, 1A	25.53	22.63	19.57	11.91	17.89	20.92	30.94	86.62	43.64
gene10286	SYNDIG1L	synapse differentiation inducing 1-like, transcript variant X1	0.51	0.37	0.33	0.61	0.45	0.81	4.37	2.71	0.4
gene10304	FOS	FBJ murine osteosarcoma viral oncogene homolog	6.3	10.22	10.12	20.54	25.19	22.85	77.28	267.76	71.81
gene10307	JDP2	Jun dimerization protein 2	12.61	15.42	13.99	25.24	25.22	18.36	169.54	221.73	73.44
gene10361	DNAJB6	DnaJ (Hsp40) homolog, subfamily B, member 6, transcript variant X2	88.21	93.37	78.77	75.27	68.59	97.86	163	153.07	207.08
gene10385	KLF6	Kruppel-like factor 6, transcript variant X1	39.47	39.34	38.54	48.39	62.86	50.18	93.58	159.67	84.21
gene10505	CHD7	chromodomain helicase DNA binding protein 7	6.17	5.82	4.98	2.14	4.89	6.98	9.1	16.82	12.72
gene10570	UGDH	UDP-glucose 6-dehydrogenase	50.04	65.99	48.94	46.11	46.51	50.57	197.67	316.77	88.01
gene10590	PPP2R3A	protein phosphatase 2, regulatory subunit B'', alpha, transcript variant X2	11.55	7.45	10.78	12.66	12.43	10.92	21.83	25.36	14.12
gene10638	NEU4	sialidase 4	0.08	0.12	0.04	0.02	0.06	0.08	1.92	3.03	1.22
gene1071	CD80	CD80 molecule, transcript variant X1	8.32	5.3	8.21	6.65	6.05	7.36	12.33	15.39	18.93
gene10732	THSD7B	thrombospondin, type I, domain containing 7B, transcript variant X1	0.21	0.08	0.14	0.08	0.12	0.04	0.22	0.32	2.83
gene1089	VGLL3	vestigial-like family member 3, transcript variant X1	3.19	5.11	3.22	3.6	4.02	3.85	17.35	11.02	15.38
gene11034	LOC106039631	cubilin-like	0.72	0.47	0.6	0.51	0.62	0.55	2.78	2.6	1.48
gene11126	OAF	out at first homolog	155.8	202.68	244.23	172.1	153.66	231.34	458.6	551.02	265.91
gene11127	LOC106039711	histone-lysine N-methyltransferase 2D-like	3.3	2.77	3.38	2.12	2.76	4.23	13.84	24.45	8.89
gene11465	EPHA2	EPH receptor A2	7.71	14.36	8.69	11.33	7.62	4.64	19.27	48.71	16.16
gene11745	KLF4	Kruppel-like factor 4 (gut)	40.09	45.06	45.63	60.13	72.16	76.61	365.58	388.57	64.23
gene1179	LOC106041184	oxidative stress-responsive serine-rich protein 1-like	42.13	23.22	49.02	48.39	66.99	43.71	151.4	125.88	63.97
gene11812	PIM3	Pim-3 proto-oncogene, serine/threonine kinase	43.11	25.62	33.24	24.48	38.41	42.95	79.24	208.75	87.31
gene11820	ALG12	ALG12, alpha-1,6-mannosyltransferase	13.11	22.62	15.62	14.5	15.45	26.75	34.27	40.84	35.11
gene11909	ST14	suppression of tumorigenicity 14 (colon carcinoma), transcript variant X1	13.18	9.03	10.27	13.46	10.72	10.99	27.9	27.54	22.45
gene11981	PHF19	PHD finger protein 19	19.96	14.89	15.28	11.87	15.83	14.09	26.79	50.16	25.76
gene120	CH25H	cholesterol 25-hydroxylase	14.75	13.22	17.52	18.58	7.04	17.99	42.36	84.88	14.67
gene12039	ANGPTL2	angiopoietin-like 2	101.01	123.67	108.48	169.33	190.2	162.32	401.18	231.11	291.38
gene12056	TNFRSF6B	tumor necrosis factor receptor superfamily, member 6b, decoy	4.25	4.12	4.95	3.01	4.24	2.02	31.05	171.53	18.12
gene1213	LOC106041525	uncharacterized LOC106041525, transcript variant X1	0.05	0.15	0.07	0.08	0.08	0.1	0.27	0.67	0.5
gene12162	ADM	adrenomedullin	21.36	20.94	18.29	17.77	22.21	16.36	78.85	58.35	92.34
gene12197	SRC	SRC proto-oncogene, non-receptor tyrosine kinase	9.97	8.19	6.04	9.37	10.91	8.9	22.91	34.46	18.67
gene12205	SDC4	syndecan 4, transcript variant X1	102.14	118.52	110.53	84.82	110.95	92.95	220.27	530.34	264.43
gene1226	LOC106041591	uncharacterized LOC106041591, transcript variant X1	9.91	5.52	5.05	3.2	6.7	4.81	34.96	32.33	11.35
gene1227	NFATC2	nuclear factor of activated T-cells, cytoplasmic, calcineurin-dependent 2, transcript variant X3	10.88	11.77	4.01	10.66	12.12	5.42	32.03	44.03	19.7
gene12291	LOC106041042	C-C motif chemokine 4-like	2.62	2.49	6.24	0.91	1.21	2.48	49.23	46.31	41.65
gene12470	HPGDS	hematopoietic prostaglandin D synthase	3.06	4.94	0.74	0.6	0.96	4.65	6.01	13.66	14.67
gene12509	WNT2B	wingless-type MMTV integration site family, member 2B	1.62	0.68	1.3	4.69	5.8	2.79	40.28	11.07	2.23
gene12533	LAMB3	laminin, beta 3	3.38	0.53	3.4	1.58	1.9	1.61	4.18	18.31	2.46
gene12539	LOC106041313	uncharacterized LOC106041313, transcript variant X2	11.65	13.78	7.07	6.86	9.9	8.81	13.01	36.29	15.16
gene12594	ETNK2	ethanolamine kinase 2	0.1	0.34	0.72	0.11	0.1	0.6	2.06	10.27	1.93
gene12596	DPH1	diphthamide biosynthesis 1	9.45	8.05	10.27	2.13	10.02	6.76	39.65	64.48	21.03
gene12636	LOC106041492	C-C motif chemokine 4-like	100.72	8.37	116.31	29.13	72.73	52.08	136.09	469.6	377.8
gene12814	LOC106041602	E-selectin-like, transcript variant X1	11.33	6.91	9.1	2.67	2.95	8.6	28.16	282.01	17.93
gene12857	LOC106041672	interleukin-1 receptor type 1-like, transcript variant X1	13.17	11.3	9.19	15.44	16.51	13.72	37.64	96.54	20.8
gene13006	TPPP	tubulin polymerization promoting protein, transcript variant X1	4.11	3.19	3.27	7.51	5.32	5.32	25.45	18.96	15.36
gene13079	EREG	epiregulin, transcript variant X1	0.5	0	0.96	0.42	0.26	0.25	1.51	3.56	1.47
gene13108	SLC25A24	solute carrier family 25 (mitochondrial carrier; phosphate carrier), member 24	16.58	13.72	11.16	18.16	18.99	19.79	46.54	64.11	28.87
gene13109	FAM102B	family with sequence similarity 102, member B, transcript variant X1	36.89	16.32	21.67	30.18	36.34	23.24	176.61	206.06	56.21
gene13146	NAMPT	nicotinamide phosphoribosyltransferase, transcript variant X1	63.9	40.65	60.5	34.99	61.24	39.46	92.4	149.87	66.56
gene13202	TES	testin LIM domain protein	28.32	30.53	31.95	21.51	21.27	36.4	61.31	84.77	51.35
gene13212	WNT2	wingless-type MMTV integration site family member 2	5.13	4.65	2.2	4.25	4.11	5.59	66.63	13.32	8.03
gene13237	HOMER1	homer scaffolding protein 1, transcript variant X1	1.08	3.34	1.91	1.17	1.65	5.77	6.09	21.45	4.39
gene13265	DDX3X	DEAD (Asp-Glu-Ala-Asp) box helicase 3, X-linked	320.81	383.91	248.41	267.2	260.26	308.66	517.94	704.75	709.11
gene13382	PAX1	paired box 1	1.52	3.65	4.84	0.58	5.2	1.76	18.85	26.49	3.88
gene13386	THBD	thrombomodulin	196.42	321.9	293	188.24	139.36	323.47	543.13	1035.59	489.25
gene13393	FBLN7	fibulin 7	4.26	3.26	3.82	9.59	5.48	3.74	70.7	13.46	4.2
gene13523	LRRC32	leucine rich repeat containing 32, transcript variant X1	6.36	6.68	6.17	7.59	6.62	12.89	25.65	13.69	9.43
gene13559	SPRY1	sprouty RTK signaling antagonist 1, transcript variant X3	25.05	16.99	13.78	15.39	16.45	14.26	27.73	45.47	35.33
gene13696	CARS	cysteinyl-tRNA synthetase	19.57	25.68	21.58	17.8	23.61	22.27	44.42	55.48	40.94
gene13699	PHLDA2	pleckstrin homology-like domain, family A, member 2	32.31	50.22	50.07	18.41	12.84	25.77	828.5	1415.87	172.27
gene13710	TSPAN32	tetraspanin 32, transcript variant X1	0.84	0.7	0.45	0.71	0.86	1.36	2.1	3.83	2.01
gene13809	VCAN	versican	22.41	52.16	29.06	46.31	38.75	82.89	99.58	158.58	61.56
gene1388	CHAC1	ChaC glutathione-specific gamma-glutamylcyclotransferase 1	4.82	9.88	5.5	7.59	13.25	3.89	34.01	14.07	21.78
gene13978	HECW1	HECT, C2 and WW domain containing E3 ubiquitin protein ligase 1	3.45	1.57	1.64	1.24	2.98	2.21	3.92	6.14	4.8
gene14054	LOC106042992	putative P2Y purinoceptor 10	11.49	16.08	14.22	17.02	15.23	13.45	53.95	19.48	22.21
gene14127	BCAR1	breast cancer anti-estrogen resistance 1, transcript variant X1	35.03	37.03	45.12	51.73	52.01	36.99	62.55	130.36	61.13
gene14391	LOC106043342	transmembrane protein 2-like	3.27	2.25	2.02	0.76	3.73	2.64	5.13	7.18	8.53
gene14392	CEMIP	cell migration inducing protein, hyaluronan binding	1.3	3.73	1.23	0.41	1.9	2.46	4.95	4.05	13.25
gene14601	DNAJC6	DnaJ (Hsp40) homolog, subfamily C, member 6, transcript variant X2	2.84	1.56	1.44	1.78	1.24	3.69	4.33	4.57	3
gene14604	PDE4B	phosphodiesterase 4B, cAMP-specific	16.99	29.63	22.22	23.44	26.64	17.24	91.92	196.96	69.55
gene14895	NR4A2	nuclear receptor subfamily 4, group A, member 2	1.3	1.03	1.07	1.68	1.8	0.55	37.05	114.62	10.18
gene14921	IRG1	immunoresponsive 1 homolog (mouse), transcript variant X1	3.54	2.88	0.57	0.96	2.36	0.83	3.66	9.62	18.05
gene14962	MOB1B	MOB kinase activator 1B, transcript variant X1	15.55	13.69	13.1	11.01	12.73	13.37	24.24	43.18	24.13
gene15034	SAMD4A	sterile alpha motif domain containing 4A, transcript variant X1	21.66	34.39	20.78	37.05	44.77	27.17	83.33	103.62	58.64
gene15096	CCDC180	coiled-coil domain containing 180, transcript variant X1	0.62	0.11	0.27	0.65	0.36	0.7	0.27	0.89	7.58
gene15241	HIVEP2	human immunodeficiency virus type I enhancer binding protein 2, transcript variant X8	21.75	20.68	13.82	31.21	35.09	25.09	47.02	72.53	51.32
gene15278	SPSB1	splA/ryanodine receptor domain and SOCS box containing 1	28.83	26.44	25.56	26.88	34.21	24.32	84.95	109.35	70.42
gene15280	TMEM201	transmembrane protein 201	14.37	13.62	12.02	6.9	9.72	18.02	25.1	27.48	24.1
gene15394	LZTS1	leucine zipper, putative tumor suppressor 1	7.35	6.91	11.59	7.66	10.71	6.81	11.31	19.35	21.92
gene15435	TMEM2	transmembrane protein 2, transcript variant X1	10.26	8.7	8.17	5	6.39	6.58	36.14	55.88	23.52
gene15493	DIO2	deiodinase, iodothyronine, type II, transcript variant X1	1.9	0.96	2.83	3.87	1.22	1.78	6.8	16.52	7.43
gene15614	LOC106044678	ras-like GTP-binding protein rhoA, transcript variant X1	0.14	0.03	0.16	0.05	0.06	0.15	2.43	8.42	0.68
gene15849	ARRDC2	arrestin domain containing 2, transcript variant X2	134.66	102.37	140.22	108.53	120.35	85.8	207.51	393.76	201.31
gene1597	EMP1	epithelial membrane protein 1	81.04	109.51	86.76	224.17	287.78	160.46	1151.05	1323.01	232.87
gene16174	LOC106045305	uncharacterized LOC106045305, transcript variant X3	0.64	0.68	0.56	0.13	0.48	0.24	4.84	8.45	3.41
gene16175	LOC106045306	uncharacterized LOC106045306	0.13	0.29	0.26	0	0.54	0	1.45	2.99	2.52
gene16188	NFKB1	nuclear factor of kappa light polypeptide gene enhancer in B-cells 1	54.89	50.9	38.94	45	35.28	44.12	67.92	138.65	102.11
gene16394	EDA2R	ectodysplasin A2 receptor	14.57	9.65	22.31	7.29	13.44	9.82	120.32	93.94	29.31
gene16452	UGP2	UDP-glucose pyrophosphorylase 2	105.29	103.44	81.12	125.66	133.23	164	418.36	482.8	255.42
gene16496	MFSD12	major facilitator superfamily domain containing 12, transcript variant X1	15.44	11.02	10.9	10.58	13.36	7.94	27.44	27.49	26.29
gene16522	DOT1L	DOT1-like histone H3K79 methyltransferase	8.98	9.61	6.05	5.08	11.87	10.12	40.57	66.42	41.48
gene16525	AMH	anti-Mullerian hormone	0	0.02	0.08	0.17	0.03	0.17	0.5	0.56	0.39
gene16569	PPM1E	protein phosphatase, Mg2+/Mn2+ dependent, 1E, transcript variant X5	4.94	5.76	2.92	5.82	8.16	7.34	14.71	23.94	14.07
gene16609	ADORA2B	adenosine A2b receptor	2.15	1.21	1.46	1.13	1.79	0.85	3.19	14.24	4.68
gene16632	ATP2B4	ATPase, Ca++ transporting, plasma membrane 4, transcript variant X1	24.67	20.53	18.3	29.51	27.45	34.4	59.68	62.26	34.57
gene16639	BTG2	BTG family, member 2	48.96	58.98	61.16	44.99	64.09	37.76	98.26	225.16	159.84
gene16641	LOC106045866	acidic mammalian chitinase-like	8.41	4.17	2.26	2.62	9.51	0.91	13.37	26.42	18.58
gene16679	NAV1	neuron navigator 1	37.18	28.11	31.06	35.07	47.98	53.11	83.38	49.53	87.71
gene16692	LOC106045913	C-X-C chemokine receptor type 2-like	1.1	1.3	0.91	1.12	0.57	1.19	2.78	22.88	3.79
gene16763	ITGB3	integrin, beta 3 (platelet glycoprotein IIIa, antigen CD61), transcript variant X1	6.62	13.92	7.41	4.32	5.39	12.4	36.77	78.84	28.33
gene16979	PROSER2	proline and serine rich 2	2.06	1.35	3.16	2.42	3.44	1.05	7.09	11.65	2.87
gene17036	MXD1	MAX dimerization protein 1	18.4	13.41	15.91	11.51	12.77	15.45	30.23	52.44	23.33
gene17302	PTAFR	platelet-activating factor receptor	7.39	4.56	4.12	5.7	6.26	4.7	9.83	11.71	12.64
gene17435	LOC106046705	uncharacterized LOC106046705, transcript variant X2	0.57	0.35	0.2	0.23	0.29	0.36	3.02	7.33	1.28
gene17471	SOCS3	suppressor of cytokine signaling 3	5.01	6.37	6.69	3.84	3.99	3.65	56.92	138.39	44.11
gene17581	TNFAIP6	tumor necrosis factor, alpha-induced protein 6, transcript variant X1	2.71	1.92	7.07	9.3	7.94	3.89	102.17	590.96	39.57
gene17831	KIAA1755	KIAA1755 ortholog	4.69	2.85	4.81	2.2	3.72	4.33	9.65	7.82	7.91
gene17866	MYOCD	myocardin	18.44	9.85	8.51	6.99	6.89	15.47	27.7	120.92	71.54
gene17883	GAS7	growth arrest-specific 7	20.69	20.32	13.81	18.19	29.85	22.56	52.08	40.1	30.01
gene17925	ERRFI1	ERBB receptor feedback inhibitor 1, transcript variant X2	11.13	8.54	8.34	6.05	8.49	7.95	16.56	30.78	14.18
gene17928	LOC106047256	hemicentin-2-like	0.04	0.02	0	0.05	0.1	0	1.13	0.04	0.08
gene18075	CNTNAP2	contactin associated protein-like 2	12.48	10.09	11.77	7.46	20.09	16.66	23.64	29.33	26.52
gene18252	IL1RAP	interleukin 1 receptor accessory protein, transcript variant X7	13.72	15.48	10.22	10.08	14.01	15.92	23.42	50.94	32.57
gene18268	GPR37	G protein-coupled receptor 37 (endothelin receptor type B-like)	0.18	0.28	0.09	0.96	0	0.28	3.19	2.61	0.3
gene1827	LOC106047885	arg8-vasotocin receptor-like	0.08	0.07	0.4	0.17	0.08	0	0.72	8.44	1.38
gene18304	SUCNR1	succinate receptor 1	2.51	1.73	2.87	1.92	3.2	1.86	11.48	15.11	7.79
gene18374	LMBR1L	limb development membrane protein 1-like	3.86	1.56	5.17	2	1.92	3.95	6.57	13.12	4.69
gene18412	RGS16	regulator of G-protein signaling 16, transcript variant X1	0.53	0.44	1.08	0.12	0	1.71	1.54	12.43	2
gene18680	LOC106048089	solute carrier family 2, facilitated glucose transporter member 3, transcript variant X1	56.96	45.38	38.12	50.01	69.08	40.56	79.74	158.9	99.06
gene18701	LOC106048083	ovostatin-like	2.94	0.02	3.68	2.55	0.11	0.68	11.08	40.13	3.06
gene18789	SBNO2	strawberry notch homolog 2 (Drosophila), transcript variant X1	24.06	17.86	19.79	14.08	18.68	14.49	34.93	122.21	40.55
gene18834	LOC106048250	membrane-associated phosphatidylinositol transfer protein 1-like	5.98	4.23	6.48	3.54	6.17	6.96	8.36	18.13	10.8
gene18849	LOC106048249	olfactory receptor-like protein COR4, transcript variant X1	0.55	0.3	0.29	0.32	0.2	0.2	1.9	3.69	5.28
gene18929	PLIN2	perilipin 2, transcript variant X1	82.36	62.92	94.46	92.73	126.24	140.64	295.91	555.2	277.8
gene18977	ACSBG2	acyl-CoA synthetase bubblegum family member 2, transcript variant X1	32.75	31.54	20.63	25.63	30.22	23.48	74.77	76.17	66.25
gene18979	RFX2	regulatory factor X, 2 (influences HLA class II expression)	5.45	3.72	4.62	5.6	11.57	4.8	69.24	126.7	27.52
gene18995	CSF1	colony stimulating factor 1 (macrophage)	26.03	29.08	23.69	30.7	37.03	30.02	84.97	67.22	45.3
gene19020	CDKN1A	cyclin-dependent kinase inhibitor 1A (p21, Cip1)	15.59	9.81	16.43	10.74	9.01	6.97	53.92	63.03	46.45
gene19153	LCA5	Leber congenital amaurosis 5, transcript variant X3	2.27	1.87	1.49	2.89	2.3	2.63	2.89	5.1	4.65
gene19245	LOC106048703	keratin, type II cytoskeletal 5-like	0.18	0	0.18	0.03	0.07	0.06	0.91	15.32	0
gene19301	PLEC	plectin	290.27	220.7	295.89	294.51	371.33	385.84	542.89	826.63	335.96
gene1932	KIF26B	kinesin family member 26B	0.55	0.39	0.36	0.29	0.43	0.49	0.72	1.34	0.81
gene19337	ETV4	ets variant 4	1.78	0.69	2.84	1.07	3.31	1.97	5.51	13.76	2.27
gene19382	STC1	stanniocalcin 1, transcript variant X1	1.47	0.85	1.47	4.05	1.62	0.58	9.19	28.6	1.87
gene19384	ADAM28	ADAM metallopeptidase domain 28, transcript variant X1	1.92	0.98	1.52	0.2	1.66	2.29	1.63	13.44	8.32
gene19453	GCK	glucokinase (hexokinase 4)	29.06	28.48	23.97	19.54	22.54	21.24	51.85	85.36	51.13
gene19468	TMEM40	transmembrane protein 40, transcript variant X1	5.58	1.24	4.58	2.6	2.92	2.74	9.28	25.98	8
gene19493	LMNA	lamin A/C	138.76	127.79	120.25	200.94	220.81	149.95	483.69	1027.69	345.72
gene19513	LOC106048983	serpin B10-like	1.56	1.12	1.13	2.93	7.13	15.22	54.46	379.28	8.76
gene1961	FEZ2	fasciculation and elongation protein zeta 2 (zygin II), transcript variant X1	18.01	14.67	13.56	18.01	23.26	18.9	40.89	33.42	22.66
gene19641	LOC106049124	protein MRP-126	57.74	87.29	38.54	23.09	68.81	257.04	361.99	2075.55	208.48
gene19735	LOC106049225	uncharacterized LOC106049225	0	0	0.12	0.41	0	0	7.22	0.55	4.83
gene19738	LOC106049220	feather keratin B-4-like	0.26	0	0.13	0	0	0.27	4.69	5.69	0.15
gene19739	LOC106049217	scale keratin-like	0.16	0	0.48	0.36	0	0	4.63	5.18	1.03
gene19742	LOC106049222	scale keratin	0.47	0	0	5.12	0	0.23	37.52	0.15	24.11
gene19862	SULT2B1	sulfotransferase family, cytosolic, 2B, member 1	0.25	0.35	0.61	0.29	0.4	0.11	1.12	2.88	0.49
gene20050	LOC106049547	uncharacterized LOC106049547	0.42	0.14	0.16	0.22	0.32	0.48	1.09	1.16	1.58
gene20242	LOC106049758	zinc finger protein RFP-like	18.92	22.09	21.06	7.45	12.24	31.57	42.47	102.03	34.04
gene20243	LOC106049751	E3 ubiquitin-protein ligase TRIM39-like, transcript variant X1	29.16	33.09	33.08	12.14	22.9	47.52	75.1	206.02	69.26
gene20275	LOC106049783	intercellular adhesion molecule 5-like	28.86	23.46	30.33	14.65	18.75	22.73	61.21	132.4	51.92
gene20276	S1PR2	sphingosine-1-phosphate receptor 2	6.85	5.7	5.21	6.43	8.34	5.57	11.77	13.22	14.26
gene20364	LOC106049872	leukotriene B4 receptor 1-like	0.81	0.66	0.39	0.08	0.33	0.88	1.25	4.42	2.62
gene20429	IL4I1	interleukin 4 induced 1	1.3	0.43	1.01	0.26	0.62	1.17	2.97	32.44	0.87
gene20451	RHOD	ras homolog family member D	1.17	0.64	0.75	1	0	0.9	4.64	11.16	2.73
gene20453	LOC106049954	mas-related G-protein coupled receptor member H-like, transcript variant X1	27.7	25.21	39.41	33.03	45.55	23.9	69.29	237.89	49.39
gene20455	LOC106029317	mas-related G-protein coupled receptor member A2-like, transcript variant X1	4.23	4.06	6.19	4	4.06	3.2	6.54	17.94	8.06
gene2048	LOC106029772	uncharacterized LOC106029772	0.31	1.35	0.66	2.08	0.45	1.75	1.94	7.69	2.38
gene2049	TRNASTOP-UCA	tRNA-Tyr	0.21	0.09	0.21	0.22	0.11	0	0.69	6.25	0.47
gene2053	FOSL2	FOS-like antigen 2	31.07	18.37	35.23	16.55	24.48	18.74	92.66	218.57	58.99
gene20575	SUPT5H	suppressor of Ty 5 homolog (S. cerevisiae)	21.2	19.84	19.37	12.94	18.14	19.31	28.52	56.83	28.62
gene20646	LOC106029507	proto-oncogene c-Fos-like, transcript variant X1	0	2.87	0.47	4.66	5.81	1.66	141.39	433.24	42.31
gene20707	LOC106029573	interferon-induced guanylate-binding protein 2-like	152.58	84.07	242.32	82.92	126.91	171.79	331.35	613.91	171.25
gene212	ADAM8	ADAM metallopeptidase domain 8	2.88	1.61	1.75	1.61	2.06	3.3	7.7	8.11	5.03
gene2144	LOC106029819	gap junction gamma-1 protein-like	72.71	57.72	58.84	30.94	33.09	83.57	96.95	250.21	70.38
gene2146	SLC4A3	solute carrier family 4 (anion exchanger), member 3	4.92	3.48	4.27	2.58	3.23	4.69	8.21	16.14	6.21
gene2150	ITGB6	integrin, beta 6, transcript variant X4	0.81	0.08	0.6	0.23	0.61	0.69	2.3	2.94	1.42
gene2407	IL6	interleukin 6	0.28	0.25	0	0	0.6	0.27	0.32	15.29	1.31
gene2475	ANKRD28	ankyrin repeat domain 28, transcript variant X1	21.57	12.89	13.31	12.4	13.55	19.8	67.55	119.14	26.83
gene257	OIT3	oncoprotein induced transcript 3, transcript variant X1	0.23	0.14	0.1	0.12	0.28	0.17	0.79	0.62	0.64
gene2722	LOC106030627	neural-cadherin-like	0.27	0.13	0.13	0.02	0.23	0.08	0.18	2.08	0.31
gene2831	PI15	peptidase inhibitor 15	1.25	3.38	2.39	1.63	0.77	1.94	11.7	9.58	11.26
gene2941	ODC1	ornithine decarboxylase 1	34.53	38.26	39.89	47.42	43.28	27.27	81.97	103.28	52.66
gene3208	LOC106031010	uncharacterized LOC106031010, transcript variant X4	0.25	0.33	0.41	0.17	0.48	0.4	3.1	4	0.99
gene3209	KDM7A	lysine (K)-specific demethylase 7A	6.32	4.23	3.42	5.25	7.87	6.18	21.78	64.43	12.62
gene3210	LOC106031011	cystine/glutamate transporter-like, transcript variant X2	0.15	0.76	0.48	0.23	0.11	0.27	2.68	12.46	0.35
gene3376	CCDC92	coiled-coil domain containing 92, transcript variant X2	1.89	0.83	1.67	1.29	2.82	1.24	2.3	5.9	2.95
gene343	ARID5B	AT rich interactive domain 5B (MRF1-like), transcript variant X1	11.44	11.4	8.64	11.06	9.71	12.09	36.46	80.55	38.65
gene3437	LOC106031234	uncharacterized LOC106031234	2.97	2.22	3.03	1.05	3.93	2.15	7.81	6.89	6
gene347	RHOBTB1	Rho-related BTB domain containing 1, transcript variant X5	1.12	0.4	1.01	0.68	0.74	0.76	2.41	2.71	0.83
gene3742	ATF3	activating transcription factor 3	5.35	5.46	4.95	6.65	10.84	5.25	52.08	75.13	27.11
gene3805	PLEK2	pleckstrin 2, transcript variant X1	2.43	1.76	2.85	1.89	2.16	1.36	3.66	26.31	2.97
gene3937	ITGBL1	integrin, beta-like 1 (with EGF-like repeat domains)	4.74	6.13	4.15	7.67	1.96	3.49	14.59	10.5	8.02
gene3953	LOC106031833	uncharacterized LOC106031833, transcript variant X2	4.56	3.44	3.05	0.75	0.52	3.37	14.09	107.05	9.47
gene3958	TRIM8	tripartite motif containing 8	23.67	19.4	23.21	18.3	19.52	12.71	49.29	93.74	40.55
gene4021	ADRA2A	adrenoceptor alpha 2A	13.07	7.96	7.71	5.73	7.97	6.29	11.21	55.97	22.25
gene4102	PLD1	phospholipase D1, phosphatidylcholine-specific, transcript variant X5	21.93	16.78	13.69	12.71	16.96	20.65	33.13	39.04	30.19
gene4298	HHIP	hedgehog interacting protein	0.24	0.26	0.31	0.43	0.17	0.49	3.12	0.71	0.28
gene4411	NPY1R	neuropeptide Y receptor Y1, transcript variant X3	0.02	0.02	0	0	0.02	0	0.42	0.02	0.26
gene4448	MFAP3L	microfibrillar-associated protein 3-like, transcript variant X1	19.04	12.55	20.21	35.29	18.51	31.21	66.09	72.55	18.57
gene4522	CTGF	connective tissue growth factor	156.26	266.49	188.16	253.97	317.57	103.34	320.99	474.13	463.94
gene4534	LOC106032501	vascular non-inflammatory molecule 3-like	0	0	0.17	0	0.07	0	1.08	0.36	1
gene4609	REV3L	REV3-like, polymerase (DNA directed), zeta, catalytic subunit	16.33	10.81	10.13	8.49	15.83	10.71	20.14	31.53	20.22
gene4759	FNIP1	folliculin interacting protein 1, transcript variant X1	25.59	16.88	17.34	26.47	30.36	25.65	35.43	47.64	43.75
gene4789	CXCL14	chemokine (C-X-C motif) ligand 14	4.32	0.41	7.08	7.39	0.1	1.51	25.08	36.92	7.95
gene4826	GFPT2	glutamine-fructose-6-phosphate transaminase 2, transcript variant X1	27.31	100.87	57.84	73.48	89.03	139.8	257.89	508.77	98.57
gene4965	JUN	jun proto-oncogene	73.83	89.64	85.29	78.59	84.42	70.9	205.25	360.34	154.83
gene5150	KCTD19	potassium channel tetramerization domain containing 19	0.45	0.85	0.11	0.19	0.15	0.46	26.52	22.52	2.23
gene5151	LRRC36	leucine rich repeat containing 36, transcript variant X1	0.1	0.13	0.05	0.17	0.3	0.11	8.96	12.11	1.25
gene5152	LOC106033289	uncharacterized LOC106033289	0.03	0.1	0	0.08	0.08	0	5.2	6.88	1.47
gene5258	LOC106033238	fatty acyl-CoA hydrolase precursor, medium chain, transcript variant X1	0.11	0.03	0.29	0	0.11	0.15	0.24	3.44	0.08
gene5464	DCUN1D3	DCN1, defective in cullin neddylation 1, domain containing 3	12.16	8.58	6.49	8.58	7.67	7.64	15.95	21.47	16.58
gene5536	MAFK	v-maf avian musculoaponeurotic fibrosarcoma oncogene homolog K	31.85	31.91	23.68	30.6	40.22	29.46	53.62	98.02	44.83
gene5597	MAPK6	mitogen-activated protein kinase 6	40.42	34.89	40.76	27.55	31.65	34.21	59.06	185.81	57.42
gene572	CPZ	carboxypeptidase Z	5.61	13.3	9.08	6.78	4.21	19.95	33.68	43.11	22.15
gene5780	BDNF	brain-derived neurotrophic factor, transcript variant X1	0.12	0.04	0.08	0.41	0	0	0.47	0.81	0.36
gene5871	ELOVL1	ELOVL fatty acid elongase 1	74.79	72.99	83.59	61.73	56.24	91.16	107.54	265.98	129.83
gene5895	DNAJB4	DnaJ (Hsp40) homolog, subfamily B, member 4, transcript variant X2	56.98	87.89	42.68	54.17	53.12	53.85	185.5	154.19	181.7
gene5896	GIPC2	GIPC PDZ domain containing family, member 2, transcript variant X1	1.3	1.2	1.4	1.85	1.3	2.09	6	3.68	2.98
gene5943	CYR61	cysteine-rich, angiogenic inducer, 61	21.73	66.89	51.59	136.02	102.91	51.97	294.26	521.01	219.39
gene5984	PRG4	proteoglycan 4	1.05	1.17	1.2	2.65	3.44	5.92	156.41	2.8	1.61
gene6023	ARHGAP42	Rho GTPase activating protein 42	11.39	9.65	5.04	6.97	11.4	13.08	12.48	22.58	19.21
gene606	MSX1	msh homeobox 1	18.49	10.8	29.2	4.19	27.77	13.33	49.41	153.16	12.37
gene6310	ARL4C	ADP-ribosylation factor-like 4C	58.46	39.74	29.85	50.94	33.76	30.78	133.45	61.93	97.11
gene6427	CDC42EP4	CDC42 effector protein (Rho GTPase binding) 4	3.21	4.23	3.99	4.32	6.13	3.02	11.91	20.07	5.71
gene6436	SOX9	SRY (sex determining region Y)-box 9	3.24	1.69	3.05	1.85	3.38	2.66	13.53	9.4	8.59
gene6453	SLC16A6	solute carrier family 16, member 6	3.39	3.38	2.84	2.77	2.98	2.27	5.07	10.98	10.63
gene6629	SPHK1	sphingosine kinase 1	21.06	15.22	18.34	20.68	23.84	22.05	39.56	53.49	31.84
gene6637	ST6GALNAC2	ST6 (alpha-N-acetyl-neuraminyl-2,3-beta-galactosyl-1,3)-N-acetylgalactosaminide alpha-2,6-sialyltransferase 2	1.99	4.15	1.03	3.31	2.87	2.41	33.04	5.24	3.05
gene6638	ST6GALNAC1	ST6 (alpha-N-acetyl-neuraminyl-2,3-beta-galactosyl-1,3)-N-acetylgalactosaminide alpha-2,6-sialyltransferase 1	0.11	0.97	0.32	0.31	0.29	1.19	4.06	2.19	1.01
gene6726	LOC106034972	uncharacterized LOC106034972	3.93	2.02	2.36	4.34	6.53	4.76	14.91	35.58	10.53
gene6732	TGIF1	TGFB-induced factor homeobox 1, transcript variant X1	15.59	10.34	13.27	15.25	21.23	8.84	18.68	58.8	25.04
gene6753	MTCL1	microtubule crosslinking factor 1	7.72	6.16	6.22	3.34	5.11	6.77	14.88	52.91	9.39
gene6775	TUBB6	tubulin, beta 6 class V	129.41	127.71	90.25	161.76	157.98	113.42	323.54	447.98	243.54
gene6855	HTR2A	5-hydroxytryptamine (serotonin) receptor 2A, G protein-coupled, transcript variant X2	6.76	3.11	3.71	3.38	3.23	5.83	15.19	35.85	19.54
gene6974	PDLIM3	PDZ and LIM domain 3, transcript variant X2	20.33	9.29	13.52	9.2	5.28	16.45	17.79	79.98	27.04
gene7275	LOC106035469	uncharacterized LOC106035469	0.15	0.03	0.05	0.08	0.02	0.05	0.29	0.53	0.48
gene7391	PDE4D	phosphodiesterase 4D, cAMP-specific, transcript variant X1	4.09	2.98	2.61	3.61	3.77	4.58	4.56	6.84	12.57
gene7400	ZSWIM6	zinc finger, SWIM-type containing 6	9.09	8.67	6.5	6.76	7.63	6.3	25.7	44.7	21.51
gene7410	HTR1A	5-hydroxytryptamine (serotonin) receptor 1A, G protein-coupled	9.05	6.36	6.43	4.38	6.14	5.4	11.6	58.75	23.47
gene753	CLMN	calmin (calponin-like, transmembrane)	6.52	4.81	3.05	5.21	4.97	9.75	6.48	25.14	13.84
gene7530	HSP90B1	heat shock protein 90kDa beta (Grp94), member 1	228.49	407.03	280.96	227.59	272.74	656.38	615.03	780.63	891.64
gene7584	HMOX1	heme oxygenase 1	70.27	56.41	27.45	30.66	37.46	33.46	218.83	216.56	516.72
gene7713	NR4A3	nuclear receptor subfamily 4, group A, member 3	1.92	1.09	1.41	0.73	1.07	0.61	28.15	91.11	12.96
gene7956	SCG2	secretogranin II	0.97	0.49	0.89	0.27	0.3	1.09	3.8	8.07	4.33
gene8066	LOC106036393	avidin-like	57.91	44.12	41.58	46.51	53.79	67.59	225.45	842.13	130.13
gene8116	AKAP13	A kinase (PRKA) anchor protein 13	46.46	44.55	29.78	57.35	64.92	45.86	74.11	148.36	71.59
gene8173	PLEKHO2	pleckstrin homology domain containing, family O member 2	50.28	42.37	28.11	52.14	48.66	38.82	71.16	97.14	78.1
gene826	KCNK10	potassium channel, two pore domain subfamily K, member 10	0.07	0.04	0.02	0.04	0.04	0.01	0.29	0.31	0.12
gene8347	IRAK2	interleukin-1 receptor-associated kinase 2	23.3	19.81	18.94	21.19	24.29	23.21	53.05	84.64	36.25
gene8390	IL5RA	interleukin 5 receptor, alpha, transcript variant X4	0.16	0.47	0.02	0.08	0.11	0.27	0.24	0.05	3.4
gene8620	NCAM2	neural cell adhesion molecule 2, transcript variant X1	0.25	0.13	0.23	0.07	0.11	0.34	0.42	1.16	0.47
gene8680	TNC	tenascin C, transcript variant X5	38.06	46.57	34.05	28.37	29.35	177.41	301.12	404.06	387.14
gene8682	TNFSF15	tumor necrosis factor (ligand) superfamily, member 15, transcript variant X3	0.8	8.39	1.61	4.46	2.13	4.57	12.66	17.99	8.87
gene8683	LOC106037097	uncharacterized LOC106037097	0	0.11	0.03	0.08	0	0.03	0.23	1.21	0.67
gene8697	LOC106037044	glutamine synthetase	88.66	54.4	43.83	72.95	56.75	42.36	215.73	218.15	175.6
gene8766	LOC106037161	uncharacterized protein C14orf37 homolog, transcript variant X2	0.28	0.06	0	0.08	0	0.15	0.4	3.15	0.41
gene8833	HSPA2	heat shock 70kDa protein 2	584.83	300.35	834.79	452.46	383.22	382.6	4037.11	3083.07	2885.96
gene8920	SMAD7	SMAD family member 7	13.85	13.56	17.74	12.21	19.14	14.96	38.95	32.03	29.4
gene8958	PCDH19	protocadherin 19	8.82	13.16	4.4	12.25	14.38	14.46	19.25	41.98	22.63
gene8959	TNMD	tenomodulin	0.56	3.87	4.24	2.19	5.01	2.62	6	10.31	9.3
gene9082	COL28A1	collagen, type XXVIII, alpha 1	41.96	29.02	16.14	16.25	20.01	109.88	45.68	75.36	177.53
gene9351	ADGRG2	adhesion G protein-coupled receptor G2, transcript variant X1	4.47	7.44	3.52	6.62	12.23	3.99	17.32	8.53	10.4
gene9444	RNF19B	ring finger protein 19B	28.47	22.79	35.77	21.21	33.76	16.37	102.84	170.46	56.09
gene9450	KIAA1522	KIAA1522 ortholog	2.32	2.85	3.33	3.56	4.3	3.94	14.59	11.64	6
gene9510	LOC106037932	uncharacterized LOC106037932	19.07	16.21	13.86	11.37	16.38	15.45	24.94	51.03	24.61
gene9522	CSF3R	colony stimulating factor 3 receptor (granulocyte)	5.69	5.66	3.62	2.52	6.04	6.77	16.98	75.4	8.15
gene9523	LOC106038087	uncharacterized LOC106038087, transcript variant X2	4.74	3.58	1.22	3.74	1.01	12.17	12.16	52.25	5.59
gene968	NFKBIZ	nuclear factor of kappa light polypeptide gene enhancer in B-cells inhibitor, zeta, transcript variant X1	20.51	11.57	23.65	8.57	17.3	16.53	40.95	90.55	36.59
gene9953	TRIB1	tribbles pseudokinase 1	1.03	0.51	1.68	1.55	1.08	1.2	3.98	9.01	8.89
gene9984	HAS2	hyaluronan synthase 2	13.55	32.8	25.32	15.35	6.53	25.13	92.37	176.86	12.45

## Sheet: 2profile
Gene.id	symbol	Gene_description	D1201	D1202	D1203	D3001	D3002	D3003	D701	D702	D703
gene10050	CHRDL1	chordin-like 1, transcript variant X1	9.81	15.18	20.02	11.17	50.23	42.06	80.82	24.27	15.75
gene10060	IRS4	insulin receptor substrate 4	14.35	8.83	8.95	22.02	25.97	24.96	18.39	15.01	19.37
gene10289	LTBP2	latent transforming growth factor beta binding protein 2, transcript variant X1	11.29	15.36	15.31	54.32	38.36	47.32	162.15	35.75	5.7
gene10581	NSUN7	NOP2/Sun domain family, member 7, transcript variant X1	3.22	1.66	2.06	6.06	6.34	2.26	7.72	3.59	1.71
gene11017	ZNF536	zinc finger protein 536	0.23	0.11	0.12	0.61	0.25	0.66	0.24	0.55	0.19
gene11623	LOC106040258	vesicle-associated membrane protein 2-like	0.32	0.18	0.3	3.58	0.64	0.44	0.93	1.11	0.75
gene11912	ADAMTS8	ADAM metallopeptidase with thrombospondin type 1 motif, 8	1.68	3.4	2.19	17.32	8.01	3.19	6.33	6.49	3.02
gene11944	SCN3B	sodium channel, voltage gated, type III beta subunit	1.32	1.32	3.11	3.65	5.82	4.05	0.58	3.11	5.42
gene12081	EEF1A2	eukaryotic translation elongation factor 1 alpha 2	4.01	1.74	2.84	2.6	3.62	9.94	6.25	12.74	5.94
gene12158	LYVE1	lymphatic vessel endothelial hyaluronan receptor 1	8.86	25.57	18.92	89.92	25.83	47.85	56.48	5.37	36.68
gene12194	GHRH	growth hormone releasing hormone, transcript variant X3	0.06	0.04	0.13	1.94	0.75	2.47	0.19	1.36	0.14
gene12200	DBNDD2	dysbindin (dystrobrevin binding protein 1) domain containing 2	10.74	12.18	7.8	19.1	24.1	20.06	38.68	26.94	17.67
gene12268	ACVR2A	activin A receptor, type IIA, transcript variant X1	23.61	20.25	18.22	33.04	29.11	28.71	37.5	47.13	47.23
gene12496	RSBN1	round spermatid basic protein 1	5.3	1.51	1.98	6.51	6.22	5.98	4.72	5.67	9.76
gene12661	HSPB1	heat shock 27kDa protein 1	1.94	13.28	6.37	4.07	7.65	67.52	19.96	81.6	33.29
gene12730	LOC106041557	complement factor H-related protein 2-like, transcript variant X1	132.71	117.21	116.15	486.42	424.68	628.05	611.47	43.83	135.89
gene12933	HPGD	hydroxyprostaglandin dehydrogenase 15-(NAD), transcript variant X1	6.59	10.08	6.68	24.95	10.56	17.2	12.22	10.38	13.97
gene12942	SCRG1	stimulator of chondrogenesis 1, transcript variant X1	0.21	0.28	0.28	0.6	0.48	0.82	0.21	0.66	0.4
gene1334	NUMB	numb homolog (Drosophila), transcript variant X1	35.21	24.55	27.99	28.64	55.81	50.28	59.93	77.46	44.2
gene13526	TSKU	tsukushi, small leucine rich proteoglycan	18.1	26.9	38.7	61.68	48.72	58.39	79.81	132.34	39.26
gene13729	DUSP8	dual specificity phosphatase 8, transcript variant X1	2.52	4.78	4.85	20.34	18.52	11.5	17.05	23.9	14.12
gene14015	MAP1B	microtubule-associated protein 1B	1.77	3.34	1.09	7.05	3.49	7.49	16.48	8.4	4.06
gene14493	BACH1	BTB and CNC homology 1, basic leucine zipper transcription factor 1	36.75	20.98	20.15	31.26	46.59	40.29	52.69	60.93	55.69
gene14509	ARHGAP40	Rho GTPase activating protein 40, transcript variant X1	8.05	13.84	9.29	23.69	26.74	15.24	24.98	16.08	8.88
gene14545	PPM1L	protein phosphatase, Mg2+/Mn2+ dependent, 1L, transcript variant X1	5.15	4.39	1.96	8.28	8.57	6.71	5.51	6.31	5.99
gene14663	PAQR5	progestin and adipoQ receptor family member V	1.37	1.11	1.62	2.05	4.7	4.94	4.48	4.36	2.57
gene14705	ARRDC3	arrestin domain containing 3, transcript variant X1	158.62	113.17	137.76	180.02	332.24	189.14	251.03	568.28	224.25
gene1493	PAMR1	peptidase domain containing associated with muscle regeneration 1, transcript variant X1	3.72	2.45	1.05	3.88	6.48	3.67	12.86	3.95	5.12
gene14948	STBD1	starch binding domain 1	11.6	9.63	7.37	21.43	34.48	31.44	90.62	44.34	22.26
gene15062	ABL1	ABL proto-oncogene 1, non-receptor tyrosine kinase, transcript variant X1	38.5	52.53	34.69	73.21	82.57	75.69	117.4	168.13	99.13
gene15094	RALGDS	ral guanine nucleotide dissociation stimulator, transcript variant X1	23.11	18.15	14.97	56.63	57.59	44.74	61.47	66.14	44.62
gene15124	LAMB2	laminin, beta 2 (laminin S)	23.26	24.63	31.72	54.8	63.61	49.31	70.53	52.2	21.39
gene15359	FGFR1	fibroblast growth factor receptor 1	30	40.06	29.48	58.91	101.25	80.1	100.57	82.64	48.15
gene15402	IRS2	insulin receptor substrate 2	1.77	1.49	2.01	5.19	7.39	2.27	2.22	11.5	2.33
gene15429	MAMDC2	MAM domain containing 2	10.16	5.38	9.21	37.93	33.08	19.41	37.7	13.63	7.06
gene15442	ANXA1	annexin A1	438.65	396.64	393.4	1035.48	915.63	815.74	1319.26	912.25	471.18
gene15495	TSHR	thyroid stimulating hormone receptor	0.25	1.06	0.91	8.12	13.63	2.05	6.54	0.76	1.06
gene15513	DACT2	dishevelled-binding antagonist of beta-catenin 2	1.96	3.66	2.4	11.12	3.53	3.92	16.62	2.06	2.67
gene15576	LOC106044615	uncharacterized LOC106044615, transcript variant X1	25.2	24.9	30.45	62.62	87.21	51.11	64.84	38.61	42.91
gene1558	MGP	matrix Gla protein	485.75	714.4	209.45	1607.64	950.03	1562.97	905.03	354.47	1816.94
gene15605	TDRD15	tudor domain containing 15	0.19	0.52	0.14	0.1	8.75	7.06	0.1	0.15	6.09
gene1593	LOC106045920	uncharacterized LOC106045920	1.15	1.37	1.79	2.74	3.72	7.65	3.67	5.07	3.44
gene15970	LOC106045060	netrin-4-like	4.99	13.79	3.72	62.79	36.86	53.32	51.09	3.27	9.01
gene15976	KLF15	Kruppel-like factor 15, transcript variant X1	27.64	21.69	19.27	56.43	61.27	25.38	30.3	31.34	57.21
gene16054	SERINC2	serine incorporator 2	7.46	7.53	7.93	16.83	16.3	16.77	16.29	17.37	15.57
gene16126	MEGF10	multiple EGF-like-domains 10	1.17	0.69	0.86	2.89	4.71	2.85	4.59	2.58	2.74
gene16250	NTRK2	neurotrophic tyrosine kinase, receptor, type 2, transcript variant X1	13.32	14.36	17.25	25.68	23.96	25.85	45.39	44.38	19.14
gene16356	ITGA9	integrin, alpha 9, transcript variant X1	3.49	3.69	2.87	8.06	7.9	5.55	10.09	5.46	4.75
gene16395	LOC106045569	probable G-protein coupled receptor 83, transcript variant X1	0.83	2.5	2.07	12.41	13.02	4.54	12.88	2.77	0.82
gene16443	B3GNT2	UDP-GlcNAc:betaGal beta-1,3-N-acetylglucosaminyltransferase 2, transcript variant X2	25.1	17.47	20.43	38.89	45.61	20.93	35.04	55.73	41
gene16473	ANGPTL4	angiopoietin-like 4	11.64	19.98	31.75	32.04	34.78	80.14	35.1	205.96	29.4
gene16526	JSRP1	junctional sarcoplasmic reticulum protein 1	0.61	0.35	0.45	2.81	2.26	2.22	1.67	2.07	0.77
gene16655	FOXP4	forkhead box P4	2.41	2.55	2.67	7.49	6.44	4.03	8.53	10.87	5.97
gene16712	LOC106045912	cytochrome P450 27C1	4.34	1.64	4.51	6.89	5.18	7.02	13.78	16.14	3.52
gene17025	LRRTM4	leucine rich repeat transmembrane neuronal 4, transcript variant X4	0.03	0.11	0.07	1.34	0.85	1.78	0.63	0.17	0.18
gene17040	LOC106046277	potassium voltage-gated channel subfamily A member 5-like	0.35	0.24	0.31	0.9	0.73	1.65	0.54	2.03	0.5
gene17067	LOC106046287	natural killer cells antigen CD94-like	0.41	0.09	1.03	5.34	7.43	4.21	8.16	2.61	0.74
gene1718	CPM	carboxypeptidase M	16.42	13.1	17.79	40.97	43.99	39.77	46.65	39.84	52.13
gene17241	ZFPM1	zinc finger protein, FOG family member 1	4.65	4.8	3.16	11.32	9.41	9.42	4.48	12.66	8.56
gene17415	NDEL1	nudE neurodevelopment protein 1-like 1, transcript variant X1	64.49	60.68	53.02	97.05	113.79	96.79	127.68	130.81	101.09
gene17421	NTN1	netrin 1	2.25	1.81	4.15	11.87	6.93	6.18	4.23	10.85	2.4
gene17830	LOC106047130	bactericidal permeability-increasing protein-like	3.56	1.27	8.19	35.31	16.92	8.64	42.46	12.53	1.65
gene17926	LOC106047235	uncharacterized LOC106047235, transcript variant X1	1.94	1.59	0.66	1.85	4.62	3.38	1.3	6.87	1.83
gene17929	NCS1	neuronal calcium sensor 1	2.06	0.91	2.06	4.51	4.96	3.86	13.65	3.29	4.4
gene18051	CARM1	coactivator-associated arginine methyltransferase 1	0.44	0.72	1.04	2.31	2.45	2.96	2.23	2.23	1.34
gene1822	CNTN1	contactin 1, transcript variant X1	0.84	0.28	0.68	7.83	1.81	1.67	0.8	3.29	0.54
gene18313	GPR171	G protein-coupled receptor 171	4.45	2.17	2.28	6.15	4.71	14.36	2.65	6	6.81
gene18331	TM4SF1	transmembrane 4 L six family member 1	0.4	0.18	0.5	1.12	0.67	1.34	0.5	3.44	0
gene18380	SOGA1	suppressor of glucose, autophagy associated 1	13.11	9.37	6.96	17.71	22.92	22.87	11.98	16.06	16.52
gene1887	ACTN2	actinin, alpha 2, transcript variant X2	0.02	0.02	0.04	0.19	0.54	0.66	0.05	0.07	0.27
gene18980	LOC106048416	la-related protein 6-like	0.05	0	0	0.11	0.67	0.05	1.01	1.3	0.23
gene18988	ATCAY	ataxia, cerebellar, Cayman type, transcript variant X1	0.45	0.82	0.27	2.43	1.82	1.27	2.04	0.55	0.5
gene18999	SLC6A17	solute carrier family 6 (neutral amino acid transporter), member 17	0.91	0.59	0.41	1.92	3.11	2.15	5.14	14.89	1.65
gene1901	CHRM3	cholinergic receptor, muscarinic 3, transcript variant X1	0.96	0.27	0.2	3.16	1.97	1.26	0.73	1.59	2.6
gene19027	PLXDC1	plexin domain containing 1	18.58	31.31	38.38	102.03	111.77	97.91	117.16	74.62	30.51
gene19081	MUC1	mucin 1, cell surface associated	1.12	2.49	1.52	5.73	9.99	2.55	5.91	3.78	1.37
gene19298	EPPK1	epiplakin 1	3.51	5.01	1.64	3.18	8.02	24.23	20.22	20.84	15.64
gene19456	FLNC	filamin C, gamma	48.54	31.95	39.94	66.32	51.69	94.18	75.76	115.73	122.88
gene19615	FSTL3	follistatin-like 3 (secreted glycoprotein)	1.82	3.68	4.34	17.2	15.16	6.82	8.31	22.17	3.74
gene19697	HIC1	hypermethylated in cancer 1	20.86	39.88	24.61	81.28	88.21	46.97	61.27	37.72	58.73
gene19911	SDK2	sidekick cell adhesion molecule 2	1.14	1.15	0.69	2.53	2.93	1.13	1.81	2.57	1.39
gene19942	LOC106049430	IgGFc-binding protein-like	36.24	35.74	30.59	72.72	96.18	72.77	185.94	113.24	40.1
gene20048	IQCD	IQ motif containing D, transcript variant X2	1.73	0.39	0.69	1.29	4.24	2.81	1.72	3.42	0.37
gene20701	LOC106029566	alcohol dehydrogenase 1, transcript variant X1	1.85	4.07	1.65	18.66	9.44	18.79	14.57	1.29	3.33
gene20720	LOC106029588	disintegrin and metalloproteinase domain-containing protein 2-like	0.67	0.78	0.96	2.4	2.04	2.65	1.2	1.94	1.09
gene20760	LOC106029629	uncharacterized LOC106029629	0.8	0.86	0.8	4.22	6.33	17.73	12.08	0.56	1.34
gene20778	LOC106029647	uncharacterized LOC106029647	4.65	0.63	3.92	27.85	15.36	5.39	26.7	11.2	4.27
gene2088	TFCP2L1	transcription factor CP2-like 1	11.07	17.05	10.19	18.3	21.37	33.34	52.02	12.99	14.17
gene2312	RAPH1	Ras association (RalGDS/AF-6) and pleckstrin homology domains 1, transcript variant X1	8.33	10.15	7.72	14.26	12.9	12.88	11.61	22.45	21.6
gene2464	CREB5	cAMP responsive element binding protein 5, transcript variant X1	1.94	8.19	2.24	11.08	14.55	10.53	12.95	15.29	9.69
gene2478	GALNT15	polypeptide N-acetylgalactosaminyltransferase 15, transcript variant X2	23.25	8.05	8.88	24.63	42.7	30.05	30.03	33.33	20.22
gene2479	LOC106030255	uncharacterized LOC106030255	3.68	1.95	1.19	3.04	6.37	3.49	4.92	7.19	2.85
gene2563	PLXDC2	plexin domain containing 2, transcript variant X2	23.14	15.83	22.4	34.3	53.89	54.14	38.33	17.51	40.07
gene2587	FILIP1	filamin A interacting protein 1, transcript variant X1	12.65	11.54	7.75	17.86	21.73	15.69	16.33	28.67	22.3
gene2591	CD109	CD109 molecule	19.86	18.17	17.16	67.57	85.34	45.43	57.34	35.12	22.23
gene2822	PKIA	protein kinase (cAMP-dependent, catalytic) inhibitor alpha, transcript variant X1	3.62	2.85	2.25	7.12	6.18	9.13	6.58	2.64	4.84
gene2830	CRISPLD1	cysteine-rich secretory protein LCCL domain containing 1, transcript variant X1	17.81	28	20.57	43.83	39.7	50.04	54.12	38.92	28.1
gene2993	GABRA2	gamma-aminobutyric acid (GABA) A receptor, alpha 2, transcript variant X1	0.12	0.13	0.06	0.5	0.13	0.49	0.7	0.12	0.09
gene355	FAM13C	family with sequence similarity 13, member C, transcript variant X2	3.79	3.85	5.05	3.95	7.49	16.36	5.99	27.07	4.64
gene3696	CAPN2	calpain 2, (m/II) large subunit	48.92	51.76	43.69	100.59	111.98	85.26	103.28	79.59	52.66
gene3700	TLR5	toll-like receptor 5, transcript variant X1	0.15	0.21	0.04	1.38	0.52	1.11	0.33	0.42	0.68
gene3818	THBS1	thrombospondin 1	45.81	152.16	96.05	232.16	231.92	329.77	336.69	500.14	452.07
gene3860	COCH	cochlin	0.35	0.55	0.16	3.7	4.12	3.17	0.57	4.28	0.9
gene397	CDHR1	cadherin-related family member 1, transcript variant X1	1.53	0.98	1.22	1.92	3.58	2.69	1.72	3.16	1.41
gene4075	LOC106031971	uncharacterized LOC106031971, transcript variant X5	0.13	0.1	0.06	0.25	0.43	0.29	0.15	0.7	0.31
gene4233	RASD1	RAS, dexamethasone-induced 1, transcript variant X1	27.58	16.59	18.4	51.81	67.91	31.68	13.2	142.28	36.02
gene4323	DCLK2	doublecortin-like kinase 2	4.57	6.14	3.86	8.86	11.89	9.28	13.22	7.15	6.26
gene4405	FSTL5	follistatin-like 5	1.2	0.6	0.87	3.24	5.61	3.79	1.85	7.45	1.03
gene4514	TMEM200A	transmembrane protein 200A	2.51	4.04	4.31	8.5	6.97	6.88	6.95	5.68	6.73
gene4606	TRAF3IP2	TRAF3 interacting protein 2, transcript variant X1	7.95	6.1	6.83	6.37	11.02	17.3	15.35	29.2	12.86
gene4607	LOC106032579	uncharacterized LOC106032579	2.68	2.21	2.32	3.49	10.06	13	7.43	17.93	6.23
gene4608	LOC106032578	uncharacterized LOC106032578, transcript variant X1	0.69	2.12	0.57	3.71	2.11	3.86	4.47	3.96	2.66
gene478	ANXA7	annexin A7, transcript variant X1	39.45	20.95	31.9	53.9	81.29	64.7	68.06	38.96	32.55
gene4796	TGFBI	transforming growth factor, beta-induced, 68kDa, transcript variant X1	52.08	34.58	34.11	114.24	54.17	73.59	126.48	75.6	68.09
gene4840	SQSTM1	sequestosome 1	217.45	105.99	167.44	378	400.01	271.7	228.23	296.92	290.34
gene4974	PPAP2B	phosphatidic acid phosphatase type 2B, transcript variant X1	45.62	39.05	55.02	169.81	166.72	107.01	68.89	135.99	48.54
gene5067	LOC106032948	fatty-acid amide hydrolase 1-like	17.07	28.57	19.19	53.24	77.78	77.72	84.96	43.07	19.62
gene5068	LOC106033086	vitamin D3 hydroxylase-associated protein-like	0.56	1.48	0.5	1.31	2.83	2.65	10.59	4.42	1.39
gene5153	TPPP3	tubulin polymerization-promoting protein family member 3	101.94	251.26	37.8	494.2	294.64	217.86	896.3	823.88	512.12
gene5570	FBN1	fibrillin 1, transcript variant X2	81.87	243.03	134.61	435.24	349.12	401.9	628.38	153.4	117.36
gene5654	LRRC49	leucine rich repeat containing 49, transcript variant X1	4.05	4.09	5.32	8.6	11.28	8.15	11.79	9.27	4.75
gene5655	LARP6	La ribonucleoprotein domain family, member 6, transcript variant X1	12.6	12.45	10	29.39	30.31	29.6	27.92	17.57	13.54
gene5756	NAV2	neuron navigator 2	1.6	1.58	0.97	1.83	2.82	5.21	1.77	3.88	2.38
gene5824	SPON1	spondin 1, extracellular matrix protein, transcript variant X1	14.71	11.37	11.07	45.49	24.1	16.45	24.56	33.05	15.1
gene5942	DDAH1	dimethylarginine dimethylaminohydrolase 1, transcript variant X1	7.53	8.6	4.16	14.03	19.08	7.78	14.37	20.76	13.54
gene6007	LOC106034136	stromelysin-1-like	0.3	0.05	0.48	3.79	4.81	2.27	1.66	6.42	0.4
gene6009	LOC106034204	interstitial collagenase-like	0	0	0.23	0.25	0.95	2.52	2.14	8.44	1.83
gene6151	SYNJ2	synaptojanin 2, transcript variant X1	6.62	6.25	6.34	9.59	12.94	13.56	13.24	22.96	13.16
gene6291	HDAC4	histone deacetylase 4, transcript variant X1	5.54	8.36	4.22	11.63	15.07	12.24	7.91	11.56	7.41
gene6346	FN1	fibronectin 1	254.08	174.26	135.35	702.79	504.77	332.36	617.71	347.2	275.96
gene6448	FAM20A	family with sequence similarity 20, member A	7.47	7.3	6.71	14.41	21.14	13.98	18.42	10.93	6
gene6725	EMILIN2	elastin microfibril interfacer 2, transcript variant X1	35.97	57.56	45.52	108.12	93.94	99.44	123.36	139.77	68.04
gene6843	CAB39L	calcium binding protein 39-like, transcript variant X10	26.18	16.43	18.18	59.18	48.11	19.42	50.81	38.65	15.69
gene7029	SDC2	syndecan 2	103.13	81.3	80.96	132.74	159.99	170.19	214.59	213.14	204.4
gene7129	PRSS35	protease, serine, 35	23.82	33.27	31.2	49.44	63.82	62.33	76.63	78.41	31.33
gene719	HHIPL1	HHIP-like 1	16.11	16.91	14.13	35.44	30.79	29.19	36.82	30.91	12.34
gene7233	PRICKLE2	prickle homolog 2, transcript variant X1	12.56	24.02	16.49	49.77	49.03	20.98	34.11	37.87	23.98
gene7304	FGL2	fibrinogen-like 2	183.41	190.89	204.53	407.92	559.32	324.89	307.47	250.74	408.63
gene7321	HGF	hepatocyte growth factor (hepapoietin A; scatter factor), transcript variant X1	1.28	0.72	1.22	4.05	4.7	4.44	3.12	2.87	1.78
gene7322	CACNA2D1	calcium channel, voltage-dependent, alpha 2/delta subunit 1, transcript variant X1	7.01	6.45	5.17	9.33	12.97	15.58	13.99	12.36	8.24
gene745	BDKRB1	bradykinin receptor B1	0.69	1.06	1.37	3.76	4.61	2.3	3.06	2.25	0.84
gene7509	MXRA5	matrix-remodelling associated 5	23.76	22.38	23.72	37.91	80.97	31.77	95.32	21.3	33.1
gene8009	DAB2	Dab, mitogen-responsive phosphoprotein, homolog 2 (Drosophila), transcript variant X1	21.66	30.1	25	35.51	43.75	77.56	69.3	21.87	18.61
gene8326	VRK2	vaccinia related kinase 2, transcript variant X1	13.95	18.58	18.63	34.91	36.58	32.1	29.51	32.01	12.44
gene8380	BHLHE40	basic helix-loop-helix family, member e40	38.48	42.81	43.53	79.11	138.23	42.72	221.46	187.51	88.86
gene848	PLA1A	phospholipase A1 member A, transcript variant X1	1.96	0.8	1.58	1.83	4.18	9.23	3.03	3.98	2.84
gene8503	ACVR2B	activin A receptor, type IIB	0.12	0.44	0.31	1.7	2.55	0.95	1.82	0.74	0.28
gene9055	AGMO	alkylglycerol monooxygenase	4.09	2.09	3.61	3.14	8.84	17.44	5.89	4.76	7.47
gene9111	COLEC12	collectin sub-family member 12	26.14	6.48	19.21	36.94	36.23	51.83	44.69	10.85	25.21
gene9116	LOC106037619	uncharacterized LOC106037619	0.63	0.77	0.26	0.11	0.52	2.32	0.99	2.48	0.73
gene913	F5	coagulation factor V (proaccelerin, labile factor), transcript variant X1	8.54	3.46	5.56	10.08	8.67	34.08	63.06	34.41	21.09
gene9236	MAMLD1	mastermind-like domain containing 1	9.68	8.17	7.46	16.58	18.6	10.16	20.73	42.46	16.59
gene945	FILIP1L	filamin A interacting protein 1-like, transcript variant X1	22.74	17.56	13.68	33.88	34.48	32.24	26.67	49.59	40.9
gene946	LOC106038496	uncharacterized LOC106038496	0.1	0.03	0.07	0.64	2.61	0.83	0.04	0.71	0.53
gene9530	DNALI1	dynein, axonemal, light intermediate chain 1	0.52	0.92	0.65	2.71	2.45	2.11	2.63	1.17	1.94
gene9717	LOC106038159	meprin A subunit alpha-like, transcript variant X2	0.3	0.16	0.06	0.94	0.65	2.24	0.16	0.25	2.03
gene9821	NFATC1	nuclear factor of activated T-cells, cytoplasmic, calcineurin-dependent 1, transcript variant X1	25.8	24.67	21.8	49.33	80.59	28.86	92.43	117.86	68.97
gene9832	RECK	reversion-inducing-cysteine-rich protein with kazal motifs, transcript variant X1	22.88	28.96	23.17	55.69	55.98	63.94	50.38	39.43	35.78

## Sheet: 3profile
Gene.id	symbol	Gene_description	D1201	D1202	D1203	D3001	D3002	D3003	D701	D702	D703
gene1005	CD96	CD96 molecule	22.62	23.67	16.57	2.62	2.26	3.34	5.13	3.85	26.38
gene10052	TMEM164	transmembrane protein 164, transcript variant X1	25.31	18.98	16.53	4.79	9.08	13.16	18.99	18.04	24.21
gene10067	LOC106038552	ras-related protein Rab-39B, transcript variant X1	33.12	34.05	28.33	8.6	10.21	18.63	28.64	28.06	39.86
gene10078	SH2D1A	SH2 domain containing 1A, transcript variant X1	21.03	20.05	13.06	1.01	1.44	2.11	7.17	4.52	20.46
gene10080	XIAP	X-linked inhibitor of apoptosis, E3 ubiquitin protein ligase, transcript variant X5	16.61	13.03	12.82	5.85	5.28	8.56	12.63	15.5	16.64
gene10098	MAD2L1	MAD2 mitotic arrest deficient-like 1 (yeast)	23.09	20.45	20.24	1.31	1.48	2.21	8.75	8.08	18.98
gene10107	PRSS12	protease, serine, 12 (neurotrypsin, motopsin)	0.82	0.25	0.34	0.08	0.1	0.1	0.31	0.25	0.13
gene10112	LOC106038673	uncharacterized LOC106038673, transcript variant X3	1.7	0.86	1.19	0.02	0.14	0.07	0.26	1.03	0.86
gene10113	LOC106038631	uncharacterized LOC106038631, transcript variant X1	1.02	0.57	0.31	0.04	0	0.06	0.21	0.29	0.56
gene10117	NDST4	N-deacetylase/N-sulfotransferase (heparan glucosaminyl) 4, transcript variant X2	6.7	4.64	3.97	0.55	0.89	0.81	1.09	1.74	6.74
gene1014	LOC106039358	OX-2 membrane glycoprotein-like, transcript variant X2	5.46	3.59	2.6	0.17	0.08	0.05	1.02	2.04	8.49
gene10159	LEF1	lymphoid enhancer-binding factor 1, transcript variant X1	15.11	13	7.62	0.84	1.12	1.78	3.58	6.6	16.99
gene1017	BTLA	B and T lymphocyte associated, transcript variant X4	17.93	11.79	14.12	0.9	1.86	2.52	2.17	4.84	22.47
gene10171	LOC106038694	carboxypeptidase A1-like	0.41	0	2.15	0	0	0.07	1.09	0.15	1.53
gene10182	ASB13	ankyrin repeat and SOCS box containing 13	8.33	5.98	6.54	3	2.56	3.94	8.22	6.4	7.39
gene10183	LOC106038708	calmodulin, striated muscle	39.58	6.38	63.28	4.04	12.7	7.02	39.73	72.43	18.59
gene10215	IL2RA	interleukin 2 receptor, alpha, transcript variant X1	31.17	16.56	15.47	9.87	7.56	4.98	11.38	13.35	41.2
gene10217	LOC106038744	uncharacterized LOC106038744	0.13	0.11	0.23	0.03	0.01	0.01	0.12	0.18	0.23
gene10220	PRKCQ	protein kinase C, theta, transcript variant X3	31.11	30.21	22.63	3.04	3.74	6.07	6.68	6.71	37.36
gene10230	GATA3	GATA binding protein 3, transcript variant X1	25.29	19.54	13.39	3.39	4.57	4.68	8.83	7.77	24.01
gene10250	PPP2R3C	protein phosphatase 2, regulatory subunit B'', gamma	25.92	19.26	19.48	8.18	9.25	13.58	24.15	21.35	22
gene10298	EIF2B2	eukaryotic translation initiation factor 2B, subunit 2 beta, 39kDa	55.55	44.75	51.45	17.48	23.57	29.33	50.27	80.42	61.29
gene10366	NCAPG2	non-SMC condensin II complex, subunit G2, transcript variant X4	3.4	3.47	3.04	0.25	0.16	0.29	2.33	1.64	3.71
gene10408	LOC106038930	disintegrin and metalloproteinase domain-containing protein 9-like	0.36	0	0.15	0	0	0.03	0.26	0.17	0.17
gene10447	MKI67	marker of proliferation Ki-67	20.97	23.47	22.26	2.86	1.45	1.91	13.85	8.8	38.4
gene10476	LOC106039065	transmembrane protein 68-like, transcript variant X1	12.65	0.25	10.8	1.34	0.9	0.77	6.82	6.54	3.86
gene10479	LYN	LYN proto-oncogene, Src family tyrosine kinase, transcript variant X1	82.6	69.21	62.38	26.17	29.08	33.82	40.69	47.36	91.93
gene10498	TOX	thymocyte selection-associated high mobility group box, transcript variant X1	4.82	6.23	3.33	0.72	0.92	1.21	1.8	1.69	5.1
gene1050	RCSD1	RCSD domain containing 1, transcript variant X1	72.48	64.1	55.06	25.29	21.6	30.56	28.96	36.93	73.46
gene10519	LOC106039057	25-hydroxycholesterol 7-alpha-hydroxylase	16.62	5	5.47	1.38	3.56	4.48	4	7.68	9.25
gene1052	CD247	CD247 molecule	65.16	70.1	35.08	7.82	11.31	9.95	13.38	14.24	76.09
gene10548	LOC106039127	uncharacterized LOC106039127	9.72	7.69	7.46	0.81	2.36	3.44	9.88	6.61	13.72
gene10563	TMEM156	transmembrane protein 156, transcript variant X2	14.45	10.98	7.6	1.29	0.84	2.74	7.23	7.09	22.12
gene10577	RHOH	ras homolog family member H, transcript variant X1	42.13	36.65	30.48	3.87	4.3	3.56	10.86	11.21	54
gene10578	CHRNA9	cholinergic receptor, nicotinic, alpha 9 (neuronal), transcript variant X1	16.32	5.1	26.38	0.12	0.12	0.06	0.79	20.23	8.44
gene10599	ANAPC13	anaphase promoting complex subunit 13	48.03	31.29	54.53	14.93	16.01	17.39	37.26	32.01	27.31
gene1062	LOC106039877	uncharacterized LOC106039877, transcript variant X1	101.13	117.66	122.25	1.08	1.13	2.22	8.79	19.49	131.97
gene1063	CD2	CD2 molecule	72.67	53.48	39.69	5.92	7.41	6.88	33.48	23.29	81.94
gene10632	NRROS	negative regulator of reactive oxygen species, transcript variant X2	8.25	5.84	3.78	1.97	2.46	1.86	4.87	3.22	7.52
gene1065	LOC106039917	immunoglobulin superfamily member 3-like	5.57	2.91	3.11	2.37	0.95	0.75	3.22	4.03	7.8
gene10654	PASK	PAS domain containing serine/threonine kinase	6.86	4.33	4.86	2.48	2.44	1.46	4.05	2.79	4.07
gene10667	TSPEAR	thrombospondin-type laminin G domain and EAR repeats	3.16	1.35	1.58	0.41	0.08	0.57	0.57	2.33	0.4
gene10682	KLHL6	kelch-like family member 6	47.39	47.3	35.79	2.98	4.76	6.04	11.9	10.15	69.27
gene10701	BDH1	3-hydroxybutyrate dehydrogenase, type 1	86.33	81.97	78.95	27.04	20.08	37.61	59.08	59.94	107.5
gene10735	CXCR4	chemokine (C-X-C motif) receptor 4	65.63	64.65	79.34	9.2	9.33	8.05	61.72	66.05	291.8
gene10737	MCM6	minichromosome maintenance complex component 6	36.37	35.07	33.25	11.51	14	19.06	25.41	22.93	48.86
gene10740	LOC106039340	uncharacterized LOC106039340	0.84	0.44	0.6	0.08	0.12	0.5	0.6	0.84	1.04
gene10747	ACMSD	aminocarboxymuconate semialdehyde decarboxylase, transcript variant X1	4.97	2.41	2.61	0.24	0.44	0.78	1.65	1.01	4.1
gene10748	TMEM163	transmembrane protein 163	15.94	17.69	17.3	6.45	7.43	9.12	18.37	13.77	18.58
gene10772	MARCO	macrophage receptor with collagenous structure, transcript variant X1	21.8	34.31	21.1	0.72	2.35	3.27	26.55	13.93	39.26
gene10774	LOC106039365	chromosome unknown open reading frame, human C2orf76, transcript variant X2	6.24	7.11	12.78	2.66	2.76	4.02	7.85	3.36	5.85
gene10777	SCTR	secretin receptor	1.22	0.95	1.54	0.15	0.34	0.3	0.85	0.65	0.6
gene10779	ESYT3	extended synaptotagmin-like protein 3	1.05	0.74	1.04	0.34	0.14	0.54	1.47	1.25	1.25
gene10796	WNT10A	wingless-type MMTV integration site family, member 10A	27.42	0.12	11.68	0.14	0	0	6.31	55.39	8.09
gene10798	WNT6	wingless-type MMTV integration site family, member 6	2.77	0.14	1.19	0.26	0	0.16	1.23	4.44	1.08
gene10839	LOC106039479	hornerin-like, transcript variant X3	93.95	0.25	134.64	0.58	0.86	3.9	119.05	95.91	73.96
gene10862	F3	coagulation factor III (thromboplastin, tissue factor)	81	4.35	46.94	1.56	1.68	4.91	54.71	119.64	59.55
gene10889	GLMN	glomulin, FKBP associated protein, transcript variant X1	7.19	5.95	7.37	2.62	3.32	4.11	6.72	8.24	7.44
gene10962	STX11	syntaxin 11, transcript variant X1	4.73	1.8	5.01	1.09	1.4	1.01	2.14	3.29	5.59
gene10970	ADCY7	adenylate cyclase 7, transcript variant X2	40.22	29.94	24.76	5.58	10.56	9.17	23.09	13.42	51.53
gene10982	CBLN1	cerebellin 1 precursor	6.34	9.33	9.41	1.4	2.38	3.65	14.75	7.47	16.26
gene11000	SHCBP1	SHC SH2-domain binding protein 1	5.84	7.17	6.39	0.33	0.27	0.39	3.09	3.45	8.14
gene11091	LOC106039689	sterile alpha motif domain-containing protein 9-like	22.72	5.39	46.55	5.78	10.12	5.8	38.56	41.99	8.47
gene11124	LOC106039709	transmembrane protein 136-like	0.51	0	1.82	0	0	0.04	0.85	0.14	0.24
gene11125	POU2F3	POU class 2 homeobox 3, transcript variant X2	0.68	0	0.69	0	0.03	0.03	0.76	1.39	0.61
gene11128	TRIM29	tripartite motif containing 29, transcript variant X1	33.83	0.17	36.98	1.02	0.3	0.89	35.58	73.44	21.55
gene11138	CCDC153	coiled-coil domain containing 153	0.62	0.86	1.33	0.15	0.43	0.07	1.45	0.88	1.55
gene11139	PDZD3	PDZ domain containing 3	6.79	4.36	5.2	0.54	0.8	1.99	3.24	7.46	7.22
gene11141	ABCG4	ATP-binding cassette, sub-family G (WHITE), member 4	4.42	2.99	1.76	1	1.09	1.12	1.22	1.5	5.6
gene11147	POU2AF1	POU class 2 associating factor 1	16.2	23.13	24.33	1.11	0.51	1.2	2.05	1.47	24.76
gene11181	ANKK1	ankyrin repeat and kinase domain containing 1	4.45	0.16	3.52	0.02	0.08	0.06	2	2.9	1.16
gene11185	CD3D	CD3d molecule, delta (CD3-TCR complex), transcript variant X1	315.32	323.53	158.51	43.98	45.06	47.22	87.21	70.49	263.71
gene11186	CD3E	CD3e molecule, epsilon (CD3-TCR complex)	166.45	192.86	85.1	26.14	23.8	30.37	52.86	45.64	182.1
gene11187	MPZL2	myelin protein zero-like 2	1.01	0.28	3.34	0.06	0	0.05	2.24	6.05	0.84
gene11188	MPZL3	myelin protein zero-like 3	11.13	5.85	8.89	2.64	1.43	1.35	5.78	7.42	14.57
gene11193	IL10RA	interleukin 10 receptor, alpha	13.68	10.95	9.38	2.09	1.74	1.89	8.46	15.04	24.12
gene11194	TMPRSS13	transmembrane protease, serine 13	1.7	0	4.01	0	0.03	0.07	4.03	2.32	2.41
gene11197	DSCAML1	Down syndrome cell adhesion molecule like 1	0.28	0.24	0.15	0.07	0	0.02	0.07	0.27	0.99
gene11235	CCDC84	coiled-coil domain containing 84, transcript variant X1	44.71	42.92	47.68	10.18	15.07	22.68	26.31	22.1	41.39
gene11237	FOXR1	forkhead box R1	1.51	0.8	0.43	0.19	0.18	0.04	0.34	0.34	3.01
gene11238	CXCR5	chemokine (C-X-C motif) receptor 5	6.13	6.05	7.5	0.07	0	0.04	0.25	0.4	8.09
gene11282	AQP11	aquaporin 11, transcript variant X1	0.23	0.06	3.78	0.07	0.06	0.54	2.47	0.7	0.16
gene1130	LIPI	lipase, member I	3.23	3.87	3.59	1.29	0.49	0	2.4	3.29	7.24
gene11327	SERPINB5	serpin peptidase inhibitor, clade B (ovalbumin), member 5	38.65	0	36.56	0.29	0.05	0.69	58.25	184.4	20.63
gene1133	SAMSN1	SAM domain, SH3 domain and nuclear localization signals 1	48.05	44.02	33.32	13.21	12.3	12.1	16.83	29.25	53.15
gene11333	STAT1	signal transducer and activator of transcription 1, 91kDa, transcript variant X1	343.94	135.36	448.79	86.38	152.84	107.45	351.86	347.45	161.81
gene11335	STAT4	signal transducer and activator of transcription 4, transcript variant X1	30.42	23.29	20.68	4.16	9.14	9.35	14.9	11.84	36.99
gene11359	HSPD1	heat shock 60kDa protein 1 (chaperonin)	172.2	163.72	156.34	37.79	36.54	50.53	230.32	242.49	267.21
gene11374	LOC106040021	chromosome unknown open reading frame, human C2orf69, transcript variant X1	5.74	4.13	4.46	2.22	2.44	2.74	5.98	4.16	5.79
gene11383	CLK1	CDC-like kinase 1, transcript variant X1	194.33	148.37	169.91	45.94	76.65	80.98	151.73	133.22	229.76
gene11395	LOC106040019	uncharacterized LOC106040019	17.6	11.43	18.64	5.4	5.02	8.38	10.96	7.89	15.24
gene114	KIF20B	kinesin family member 20B	5.38	5.15	4.57	1.04	1.06	2.14	6.48	2.99	7.68
gene11416	CNBP	CCHC-type zinc finger, nucleic acid binding protein, transcript variant X1	22.34	11.68	13.32	3.67	12.41	9.47	12.73	22.31	21.68
gene11429	NUP210	nucleoporin 210kDa, transcript variant X1	19.62	20.89	10.19	3.81	5.05	6.29	8.15	6.04	29.5
gene11456	SUSD3	sushi domain containing 3, transcript variant X1	23.14	16.5	23.35	6.57	5.5	5.36	13.04	7.57	20.03
gene11472	ATP13A2	ATPase type 13A2	9.97	8.02	8.96	2.15	3.05	5.57	7.16	9.49	8.56
gene11538	LOC106040183	arylacetamide deacetylase-like 4	5.03	0	9.62	0	0	0.17	6.73	2.09	4.47
gene11539	LOC106040189	arylacetamide deacetylase-like 4	4.73	0.03	5.53	0.18	0.16	0.45	4.04	2.2	2.26
gene1155	MATN4	matrilin 4	3.2	0.5	4.47	0.56	0.66	0.23	1.59	1.85	1.82
gene1157	STK4	serine/threonine kinase 4	36.23	33.34	23.57	10.45	15.04	19.23	22.47	31.32	47.29
gene11570	MASP2	mannan-binding lectin serine peptidase 2, transcript variant X1	1.8	0.18	3.58	0.03	0	0.09	2.76	3.19	1.16
gene11576	DDX58	DEAD (Asp-Glu-Ala-Asp) box polypeptide 58	17.56	7.49	25.73	5.38	7.75	8.9	17.55	29.55	7.54
gene11581	TSTD2	thiosulfate sulfurtransferase (rhodanese)-like domain containing 2	17.59	13.99	12.64	3.21	3.96	7.84	15.48	16.86	17.52
gene11583	XPA	xeroderma pigmentosum, complementation group A	43.81	33.64	43.45	12.56	16.99	28.81	38.2	44.3	36.02
gene11588	DNAJA1	DnaJ (Hsp40) homolog, subfamily A, member 1	331	263.41	310.45	74.63	73.49	62.72	469.93	423.35	484.49
gene11590	LOC106040204	actin-like protein 7A	1.68	2.57	3.33	0.64	0.69	1.17	2.98	2.46	3.58
gene11630	ITM2C	integral membrane protein 2C	15.77	11.2	17.31	8.4	4.42	5.96	11.66	18.94	13.53
gene11633	GPR55	G protein-coupled receptor 55, transcript variant X4	10.4	4.95	5.97	2.14	1.58	0.76	1.07	1.06	7.9
gene11634	LOC106040278	G-protein coupled receptor 35-like	1.21	1.36	0.31	0.1	0.06	0.21	0.27	0.27	2.26
gene11636	LOC106040281	G-protein coupled receptor 35-like, transcript variant X4	2.94	2.76	1.71	1.07	0.56	0.94	1.77	3.09	3.78
gene11669	INPP5D	inositol polyphosphate-5-phosphatase, 145kDa	47.5	29.22	30.14	10.32	15.35	17.03	28.14	29.17	59.75
gene11676	LOC106040353	phospholipid-transporting ATPase IB-like	0.7	0.47	0.32	0.07	0.03	0.01	0.06	0.17	1.6
gene1169	TTPAL	tocopherol (alpha) transfer protein-like, transcript variant X1	10.54	8.53	10.02	3.74	3.37	5.15	11.14	8.29	11.43
gene11706	SKA3	spindle and kinetochore associated complex subunit 3, transcript variant X1	8.09	7.57	5.89	0.92	1.01	0.77	4.15	3.91	8.38
gene11711	N6AMT2	N-6 adenine-specific DNA methyltransferase 2 (putative), transcript variant X1	30.59	27.35	41.62	9.83	9.72	18.05	43.28	23.65	35.38
gene11716	LOC106040406	gap junction beta-6 protein	15.04	2.07	19.19	3.46	3.53	3.19	16.22	20.86	8.16
gene11717	LOC106040409	gap junction beta-6 protein-like	3.97	0	8.36	0.14	0.09	0.09	5.4	9.59	2.98
gene11721	LOC106040370	uncharacterized LOC106040370	1.89	1.1	0	0	0.26	0	2.71	0.47	2.67
gene11723	PARP4	poly (ADP-ribose) polymerase family, member 4	3.59	2.98	3.24	0.55	1.69	1.94	1.92	1.25	5.76
gene11726	ARHGAP20	Rho GTPase activating protein 20	11.41	7.04	5.66	2.17	2.81	2.96	5.69	2.9	9
gene11741	LMNB1	lamin B1, transcript variant X1	37	41.6	37.44	3.99	5.46	8.23	28.12	39.84	48.35
gene11770	THAP1	THAP domain containing, apoptosis associated protein 1	49.03	46.15	48.06	18.98	18.92	21.92	31.97	26.11	54.48
gene11784	LOC106040422	metalloprotease TIKI1-like	0.36	0.12	1.24	0.05	0	0	0.39	0.99	0.15
gene118	LOC106044214	interferon-induced protein with tetratricopeptide repeats 5-like	130.4	9.55	603.2	19.36	34.39	7.21	251.66	355.33	13.1
gene11805	IL17REL	interleukin 17 receptor E-like, transcript variant X1	6.57	7.7	4.81	0.36	0.27	0.04	3.88	4.6	8.89
gene11868	HYLS1	hydrolethalus syndrome 1	8.03	8.13	11.22	3.91	2.3	2.14	5.55	4.55	8.78
gene11870	PANX3	pannexin 3, transcript variant X1	1.5	0.92	1.87	0.09	0.11	0.55	2.23	0.51	2.29
gene11883	CHEK1	checkpoint kinase 1	7.24	7.29	8.42	2.42	4.32	2.12	6.25	8.39	8.33
gene11888	TIRAP	toll-interleukin 1 receptor (TIR) domain containing adaptor protein, transcript variant X1	14.04	11.79	10.04	4.36	3.73	4.11	7.51	12.09	8.47
gene11894	ETS1	v-ets avian erythroblastosis virus E26 oncogene homolog 1	73.31	59.72	43.49	21.53	26.68	28.65	36.59	69.79	87.09
gene1190	LOC106041315	translocating chain-associated membrane protein 1-like 1, transcript variant X1	1.58	0.47	0.69	0.13	0.29	0.39	0.47	0.44	0.71
gene11904	LOC106040547	transmembrane protein 45B-like	5.47	0.2	22.9	0.24	0.23	0.76	19.11	7.53	11.94
gene11925	IGSF9B	immunoglobulin superfamily, member 9B	1.06	1.73	0.22	0.11	0.14	0.26	0.53	0.84	2.07
gene11929	NCAPD3	non-SMC condensin II complex, subunit D3	6.2	5.79	7.06	2.41	2.58	2.8	3.86	3.77	7.63
gene11942	ATP12A	ATPase, H+/K+ transporting, nongastric, alpha polypeptide	0.4	0	4.13	0.03	0.03	0.1	5.75	1.16	4.66
gene11943	LOC106040633	uncharacterized LOC106040633, transcript variant X1	9.12	5.54	6.39	0.4	0.16	1.19	3.29	3.68	3.86
gene11968	LOC106040650	centrosome-associated protein 350	0.11	0.09	0.21	0.03	0.04	0	0.16	0.07	0.43
gene11983	TRAF1	TNF receptor-associated factor 1, transcript variant X1	30.4	28.63	22.4	12.77	11.45	13.7	17.44	29.28	37.28
gene11984	C5	complement component 5	1.04	0.43	0.81	0.03	0.12	0.12	0.49	0.98	0.4
gene11985	CNTRL	centriolin	10.07	7.68	6.29	2.55	4.36	4.88	7.35	9.1	13.84
gene11994	MORN5	MORN repeat containing 5	34	53.69	61.13	11.77	15.49	20.59	36.91	42.82	59.53
gene1200	LOC106041390	uncharacterized LOC106041390	18.6	13.31	13.27	3.79	4.73	4.19	12.57	18.7	11.33
gene12024	LOC106040731	uncharacterized LOC106040731	62.4	51.15	70.01	21.82	22.12	39.48	65.75	58.23	48.33
gene12033	MVB12B	multivesicular body subunit 12B, transcript variant X1	44.75	37.22	37.63	12.75	17.77	21.03	20.96	29.67	57.27
gene12041	LOC106040672	uncharacterized LOC106040672	41.42	35.07	30.56	6.43	11.31	14.98	35.21	31.67	62.94
gene12063	UCKL1	uridine-cytidine kinase 1-like 1	35.82	26.3	27.16	4	7.94	10.69	21.91	36.65	24.76
gene12069	RGS19	regulator of G-protein signaling 19	36.99	35.45	29.85	14.47	15.14	14.78	21.64	34	41.66
gene12086	LOC106040774	DEP domain-containing mTOR-interacting protein-like	8.36	0.21	13.48	0.17	0.25	0.73	8.53	9.83	2.24
gene12101	OGFR	opioid growth factor receptor, transcript variant X1	44.9	16.95	67.66	13.82	19.14	24.04	43.25	88.44	21.92
gene12105	SLCO4A1	solute carrier organic anion transporter family, member 4A1	2.99	3.28	2.3	0.42	0.33	0.52	1.62	4.58	2.26
gene12116	HRH3	histamine receptor H3	5.44	2.4	2.04	1.08	1.78	0.78	4.87	5.15	3.68
gene12117	MTG2	mitochondrial ribosome-associated GTPase 2	13.54	9.84	9.21	4.02	4.46	6.52	10.85	16.05	10.87
gene12131	EDN3	endothelin 3	18.94	1.94	10.99	1.07	1.38	1.14	8.84	8.29	3.48
gene12138	LOC106040874	uncharacterized LOC106040874, transcript variant X3	7.99	9.79	6.11	2.75	2.08	1.77	6.76	4	9.11
gene12165	WEE1	WEE1 G2 checkpoint kinase, transcript variant X3	17.55	14.66	16.94	4.31	5.79	4.31	23	20.6	19.06
gene12177	TRIM66	tripartite motif containing 66	8.7	11.22	5.61	1.4	1.33	2.64	4.67	4.21	12.31
gene12191	LOC106040929	uncharacterized LOC106040929	1.71	1.91	1.46	0.36	0.59	0.63	1.65	0.87	3.06
gene12192	PDE3B	phosphodiesterase 3B, cGMP-inhibited	22.83	21.56	15.9	5.24	6.69	7.44	20.7	21.91	48.2
gene12209	MGST2	microsomal glutathione S-transferase 2	36.04	33.68	42.44	21.75	6.59	16.48	18.61	35.81	49.61
gene12219	SLC7A11	solute carrier family 7 (anionic amino acid transporter light chain, xc- system), member 11	2.12	2.13	2.11	0.07	0.24	0.22	1.07	5.51	8.03
gene12254	ARHGAP15	Rho GTPase activating protein 15, transcript variant X4	27.41	28.29	22.48	5.86	4.44	7.91	11.35	11.24	48.81
gene12269	LOC106041004	origin recognition complex subunit 4-like, transcript variant X2	11.96	9.05	12.25	4.21	4.9	7.59	13.18	16.06	13.23
gene12273	VPS37D	vacuolar protein sorting 37 homolog D (S. cerevisiae)	9.48	8.34	6.01	0.42	1.08	0.54	3.71	2.34	9.32
gene12292	LOC106041040	C-C motif chemokine 5-like	34.38	15.85	13.84	3.05	3.5	2.08	21.43	16.83	22.61
gene12296	LOC106041043	1-acyl-sn-glycerol-3-phosphate acyltransferase alpha-like	22.63	0.32	12.22	0.18	0.26	1.25	12.84	14.08	8.32
gene12301	RNF43	ring finger protein 43, transcript variant X1	1.55	0.92	1.35	0.04	0.16	0.08	0.7	1.14	1.78
gene12339	NCF1	neutrophil cytosolic factor 1	43.65	39.5	40.77	16.95	17.29	15.29	23.27	33.63	51.86
gene12351	RASL11A	RAS-like, family 11, member A	3.11	2.05	2.91	0.44	0.52	0.92	2.59	2.94	2.86
gene12357	FLT3	fms-related tyrosine kinase 3, transcript variant X1	5.71	2.94	2.75	0.98	0.55	1.23	0.82	0.46	4.85
gene1237	LOC106041673	uncharacterized LOC106041673, transcript variant X1	1.01	1.88	0.88	0.09	0.22	0.55	0.61	0.44	3.41
gene12378	USPL1	ubiquitin specific peptidase like 1	23.05	14.06	15.6	2.93	5.48	11.09	12.25	14.43	15.07
gene12417	LOC106041222	lipopolysaccharide-induced tumor necrosis factor-alpha factor homolog	0.85	0.02	2.23	0	0.06	0	1.88	1.86	1.42
gene12437	CIITA	class II, major histocompatibility complex, transactivator	22.1	16.19	11.56	2.77	2.85	2.06	8.4	2.31	26.27
gene12494	BCL2L15	BCL2-like 15	17	4.77	31.49	4.12	7.54	3.27	27.99	30.16	4.87
gene12495	PTPN22	protein tyrosine phosphatase, non-receptor type 22 (lymphoid), transcript variant X1	16.52	14.42	10.85	4.07	3.98	6.27	10.8	11.5	24.46
gene125	STAMBPL1	STAM binding protein-like 1, transcript variant X4	9.32	9.73	8.29	3.66	2.85	3.32	2.98	5.99	10.48
gene12504	PPM1J	protein phosphatase, Mg2+/Mn2+ dependent, 1J, transcript variant X1	17.12	12.81	13.31	3.16	3.18	4.55	11.8	18.34	20.58
gene12506	MOV10	Mov10 RISC complex RNA helicase	22.78	11.8	34.15	7.57	8.44	8.24	25.78	45.08	13.57
gene12521	LOC106041380	adenosine receptor A3-like	2.86	1.31	4.17	0.62	1	0.36	1.93	1.65	3.44
gene12527	IRF6	interferon regulatory factor 6, transcript variant X1	14.3	0.22	15.4	1.64	3.08	0.83	9.83	20.28	6.33
gene12529	TRAF3IP3	TRAF3 interacting protein 3, transcript variant X2	46.62	43.9	30.98	3.43	5.01	7.63	6.53	6.96	50.33
gene12547	LOC106041363	polymeric immunoglobulin receptor-like	7.54	8.94	3.85	0.24	0.27	0.27	1.87	1.45	16.84
gene12556	RASSF5	Ras association (RalGDS/AF-6) domain family member 5	50.11	41.83	27.53	7.67	5.92	10.34	22.27	23.18	65.93
gene12557	IKBKE	inhibitor of kappa light polypeptide gene enhancer in B-cells, kinase epsilon, transcript variant X3	26.2	16.94	25.47	3.17	9.35	10.03	12.58	13.75	25.21
gene1257	LOC106041848	formin-H-like	14.37	12.5	15.21	0.41	0.14	0.57	1.7	0.57	17.2
gene12589	PIK3C2B	phosphatidylinositol-4-phosphate 3-kinase, catalytic subunit type 2 beta	20.1	21	23.23	6.25	10.51	12.42	11.14	21.99	20.17
gene12603	LOC106041383	apoptosis-inducing factor 3-like, transcript variant X1	6.45	0.03	7.13	0.27	0	0.37	2.13	2.46	1.45
gene12606	RILP	Rab interacting lysosomal protein	15.39	10.46	15.7	4.91	6.28	6.38	12.28	20.5	14.41
gene1261	AURKA	aurora kinase A	17.02	14.97	15.44	1.46	1.87	1.87	6.57	6.36	16.34
gene1262	CSTF1	cleavage stimulation factor, 3' pre-RNA, subunit 1, 50kDa	35.54	26.93	31.6	12.26	13.92	20.4	33.58	31.01	36.83
gene12630	CCT6A	chaperonin containing TCP1, subunit 6A (zeta 1)	186.96	167.97	170.75	83.52	77.11	86.39	173.54	224.49	228.29
gene12631	PSPH	phosphoserine phosphatase, transcript variant X2	11.72	11.27	23.11	5.22	5.17	9.17	13.29	11.53	7.14
gene12638	LOC106041491	C-C motif chemokine 3-like	21.75	5.46	14.92	2.36	3.11	0.71	15.68	12.17	6.71
gene12643	RFFL	ring finger and FYVE-like domain containing E3 ubiquitin protein ligase, transcript variant X1	15.02	11.17	13.28	2.78	3.83	8.13	7.75	12.74	26.47
gene12646	LOC106041493	schlafen family member 13-like, transcript variant X4	17.24	8.65	28.82	2.61	1.62	1.27	32.98	20.65	17.18
gene12647	LOC106041399	splicing factor 3B subunit 4-like	0.7	0.46	1.04	0.05	0.09	0.13	0.43	0.19	0.39
gene12669	ORAI2	ORAI calcium release-activated calcium modulator 2, transcript variant X2	19.78	15.67	14.02	7.43	8.7	6.62	10.99	13.7	19.4
gene1267	TFAP2C	transcription factor AP-2 gamma (activating enhancer binding protein 2 gamma)	7.74	0.13	7.21	0	0.15	0.23	2.26	0.73	3.44
gene12686	RPAIN	RPA interacting protein, transcript variant X1	9.06	4.48	10.02	2.51	2.65	3.86	13.46	8.53	4.1
gene12690	MIS12	MIS12 kinetochore complex component	4.26	6.44	7.63	1.91	2.59	1.36	5.57	4.86	5.24
gene12700	LOC106041486	protein spinster homolog 3-like, transcript variant X2	2.77	2.41	2.92	0.47	1	0.41	2.02	1.66	4.67
gene12705	LOC106041468	uncharacterized LOC106041468	3.08	2.06	3.9	0.53	1.3	0.36	0	0.84	8.16
gene12706	LOC106041503	linker for activation of T-cells family member 2-like	27.4	19.33	24.78	5.54	4.97	3.64	10.37	7.67	38.49
gene12718	SLC6A15	solute carrier family 6 (neutral amino acid transporter), member 15	6.64	0	5.44	0	0	0.03	2.7	2.9	1.27
gene12749	RGS18	regulator of G-protein signaling 18	36.63	22.21	26.92	7.67	9.75	16.35	20.57	16.95	24.02
gene12763	LOC106041607	chromosome unknown open reading frame, human C1orf111, transcript variant X1	1.31	1.33	2.05	0	0.29	0.19	2.82	1.79	0.96
gene12780	LOC106041531	dimethylaniline monooxygenase [N-oxide-forming] 5-like	0.46	0.33	5.87	0.07	0.33	0.13	10.34	1.04	1.82
gene12787	TNFSF4	tumor necrosis factor (ligand) superfamily, member 4	3.36	1.53	3.79	0.56	0.54	0.71	1.25	2.03	1.08
gene12812	METTL18	methyltransferase like 18	5.47	6.3	6.99	1.1	2.06	4.6	4.22	5.59	6.41
gene12852	IL18RAP	interleukin 18 receptor accessory protein, transcript variant X3	6.7	7.61	5.62	0.87	2.69	6	5.45	8.08	7.51
gene12853	IL18R1	interleukin 18 receptor 1	8.56	7.91	3.84	0.65	1.93	1.78	3.81	3.71	8.6
gene1287	LOC106042108	uncharacterized LOC106042108	23.92	14	19.44	4.94	9.68	5.34	14.17	14.38	12.43
gene12909	NUP153	nucleoporin 153kDa	22.47	16.19	32.5	6.56	9.09	13.85	26.47	30.1	20.55
gene12913	NEIL3	nei-like DNA glycosylase 3, transcript variant X1	1.1	1.18	1.05	0.21	0.05	0.2	1.01	0.75	1.62
gene12929	LOC106041754	uncharacterized LOC106041754, transcript variant X2	8.83	4.15	5.27	1.34	1.89	2.95	4.64	4.57	10.71
gene12946	HMGB2	high mobility group box 2	116.02	121.18	125.95	32.45	31.81	34.03	65.33	47.9	125.44
gene12965	DIAPH3	diaphanous-related formin 3	1.33	1.61	1.48	0.74	0.39	0.58	2.39	1.81	1.88
gene1298	LOC106042203	uncharacterized LOC106042203	1.43	0	2.46	0.07	0.01	0	2.58	0.79	0.06
gene12997	CX3CR1	chemokine (C-X3-C motif) receptor 1, transcript variant X1	12.67	8.38	9.61	1.39	1.93	3.43	5.37	2.51	11.4
gene12998	CCR4	chemokine (C-C motif) receptor 4, transcript variant X1	34.13	22.04	13.99	1.51	1.57	2.29	4.33	1.87	32.19
gene13027	HPSE	heparanase	7.63	6.67	6.65	1.63	1.95	3.34	6.69	7.55	6.4
gene13029	LOC106041938	placenta-specific gene 8 protein-like, transcript variant X1	246.96	57.17	457.87	63.31	66.53	18.96	185.1	412.39	62.6
gene1304	ZNF831	zinc finger protein 831, transcript variant X2	6.14	5.36	5.14	0.45	0.7	0.51	1.64	2.01	10.74
gene13041	LOC106041941	uncharacterized LOC106041941	1.83	2.68	1.73	0.49	0.86	1.25	1.2	1.88	2.89
gene13059	ABCG2	ATP-binding cassette, sub-family G (WHITE), member 2 (Junior blood group)	1.29	0.83	1.01	0.35	0.4	0.23	0.66	0.51	1.57
gene13075	LOC106041891	uncharacterized LOC106041891, transcript variant X2	0.43	0.28	0.15	0.01	0.01	0.03	0.11	0.05	0.32
gene13081	MTHFD2L	methylenetetrahydrofolate dehydrogenase (NADP+ dependent) 2-like, transcript variant X1	1.69	1.13	2.67	0.93	0.85	0.94	1.41	1.43	1.47
gene13120	KIF14	kinesin family member 14, transcript variant X1	2.58	1.77	1.81	0.33	0.56	0.87	0.99	0.86	3.52
gene13131	PTPRC	protein tyrosine phosphatase, receptor type, C, transcript variant X1	148.32	155.43	84.88	17.53	28.54	33.52	86.11	75.25	307.8
gene13143	ASPM	asp (abnormal spindle) homolog, microcephaly associated (Drosophila)	8.93	8.06	6.28	1.44	2.95	2.97	9.17	3.77	14.12
gene13175	GTSE1	G-2 and S-phase expressed 1	10.29	8.32	9.33	1.81	1.57	3.52	4.49	4.04	11.13
gene1328	DPF3	D4, zinc and double PHD fingers, family 3	5.49	5.05	2.49	1.55	1.93	1.44	4.8	4.56	6.27
gene13280	LOC106042145	uncharacterized LOC106042145	1.44	0.23	1.18	0.14	0	0	0.88	0.89	1.5
gene13287	LOC106042158	uncharacterized LOC106042158	3.59	2.58	2.81	0.65	1.04	0.86	2.6	1.88	2.87
gene13288	LOC106042157	cytochrome b-245 heavy chain	28.55	27.94	26.64	5.3	8.54	8.27	13.78	18.19	33.97
gene13310	TOP1MT	topoisomerase (DNA) I, mitochondrial, transcript variant X2	10.89	9.08	11.7	3.22	2.67	5.75	7.04	8.88	9.84
gene13313	LOC106042183	lymphocyte antigen 6E-like	152.01	0.82	284.54	2.09	2.78	5.73	208.12	169.44	103.12
gene13315	LOC106042188	lymphocyte antigen 6E-like	8.78	0.28	6.39	0.21	0.84	0.66	1.9	4.38	1.35
gene13318	LOC106042178	ly6/PLAUR domain-containing protein 2-like	4.61	0	5.65	0	0	0.65	9.16	1.53	6.71
gene13343	LOC106042218	protein-glutamine gamma-glutamyltransferase 5-like	0.52	0	0.94	0.05	0.09	0.05	0.69	1.01	0.45
gene13348	CD226	CD226 molecule, transcript variant X1	2.16	1.86	0.7	0.45	0.26	0.83	1.29	0.79	1.25
gene1335	LOC106040700	chromosome unknown open reading frame, human C14orf169	18.86	12.56	18.43	4.99	6.7	8.59	11.6	16.29	16.75
gene1336	LOC106042682	acyl-coenzyme A thioesterase 5-like	3.32	0	3.21	0.1	0	0.09	1.45	0.94	0.7
gene13398	BUB1	BUB1 mitotic checkpoint serine/threonine kinase	13.48	11.66	11.48	1.34	0.41	0.74	9.25	4.65	13.78
gene13456	STARD4	StAR-related lipid transfer (START) domain containing 4	13	12.99	11.97	2.29	2	4.22	18.24	21.68	15
gene13477	LOC106042406	disintegrin and metalloproteinase domain-containing protein 9-like, transcript variant X1	1.83	1.09	2.04	0	0	0.11	0	0.09	2.15
gene13482	KCNE3	potassium channel, voltage gated subfamily E regulatory beta subunit 3	7.88	7.19	13.54	3.06	2.66	2.24	12.86	17.52	12.32
gene13507	SERPINH1	serpin peptidase inhibitor, clade H (heat shock protein 47), member 1, (collagen binding protein 1)	392.63	786.35	587.64	164.26	114.45	313.8	681.39	693.65	672.89
gene13509	KLHL35	kelch-like family member 35	0.77	0	0.45	0.05	0	0.06	0.11	0.35	0.36
gene13541	INTU	inturned planar cell polarity protein, transcript variant X1	6.87	5.18	5.98	1.5	2.95	3.57	8.8	4.58	6.9
gene1356	PLA2G4F	phospholipase A2, group IVF	3.43	0.19	2.89	0.14	1	0.82	2.06	3.05	1.54
gene13565	LOC106042433	uncharacterized LOC106042433, transcript variant X3	0.66	1.68	1.05	0	0.09	0	0.25	0.15	0.82
gene13566	LOC106042432	uncharacterized LOC106042432, transcript variant X1	1.01	0.78	0.44	0.04	0.1	0.14	0.38	0.26	1.24
gene13574	CCNA2	cyclin A2	15.73	15.16	13.87	1.01	2.13	2.12	12.98	20.15	32.48
gene1358	LOC106042968	cytosolic phospholipase A2 epsilon-like	6.97	0	6.71	0	0	0.36	8.02	11.3	4.73
gene1359	LOC106042978	cytosolic phospholipase A2 epsilon-like, transcript variant X1	5.11	0	5.1	0.07	0	0.5	8.81	14.86	2.54
gene13591	LAMC2	laminin, gamma 2	1.59	0	3.1	0.03	0	0.07	2.07	9.13	0.61
gene1360	LOC106042985	cytosolic phospholipase A2 epsilon-like, transcript variant X1	2.06	0	2.13	0	0	0.16	1.66	1.07	1.39
gene1361	LOC106043002	-	1.63	0.02	5.18	0	0.02	0.32	2.56	1.91	1.84
gene1362	LOC106042972	cytosolic phospholipase A2 epsilon-like	10.8	0	10.98	0	0	0.4	5.97	37.6	1.86
gene13629	SOAT1	sterol O-acyltransferase 1	46.36	22.15	35.16	12.08	17.07	19.72	46.9	44.37	45.12
gene13649	TLR7	toll-like receptor 7, transcript variant X1	4.13	2.19	4.72	0.32	0.82	0.96	2.4	3.08	2.58
gene13669	GPR143	G protein-coupled receptor 143	0.41	0	0.55	0	0.03	0	0.38	0.38	0.59
gene13672	LOC106042558	uncharacterized LOC106042558	0.15	0.61	0.52	0.03	0.1	0.03	0.03	0.08	1.22
gene13726	LOC106042626	cytosolic 5'-nucleotidase 1A-like, transcript variant X2	5.91	3.61	4.32	0.84	1.62	0.98	3.85	3.65	3.66
gene13775	LOC106042678	uncharacterized LOC106042678, transcript variant X2	3.34	1.25	1.55	0.18	0.2	0.29	4.1	2.46	4.89
gene138	ERCC6	excision repair cross-complementation group 6, transcript variant X1	8.31	7.1	7.81	2.13	2.78	4.8	4.09	4.77	9.43
gene1381	NDUFAF1	NADH dehydrogenase (ubiquinone) complex I, assembly factor 1	27.21	22.34	29.74	11.16	10.25	16.18	29.46	29.2	29.44
gene1382	NUSAP1	nucleolar and spindle associated protein 1	31.84	32.52	30.83	2.8	1.76	1.84	16.3	14.23	39.48
gene13830	CKMT2	creatine kinase, mitochondrial 2 (sarcomeric)	1.89	1.1	1.46	0	0.06	0.5	0.72	1.75	2.01
gene13860	BOD1	biorientation of chromosomes in cell division 1	80.98	62.45	75.67	25.1	31.42	43.17	67	55.88	65.54
gene13867	KIF20A	kinesin family member 20A	7.89	9.26	7.58	1.66	0.89	0.71	5.25	6.22	12.11
gene13873	RGS14	regulator of G-protein signaling 14	35.05	28.18	19.45	8.97	10.68	10.01	32.84	28.76	49.88
gene13875	GRK6	G protein-coupled receptor kinase 6, transcript variant X1	12.2	11.09	9.17	3.45	5.33	4.03	6.14	7.22	13.03
gene13902	SFMBT1	Scm-like with four mbt domains 1, transcript variant X1	14.83	9.31	6.02	2.64	4.83	6.45	7.9	6.6	14.09
gene13916	LOC106042836	high mobility group protein HMGI-C-like, transcript variant X2	5.67	6.52	4.49	0.45	0.73	1.19	2.49	3.29	5.87
gene13918	HEMK1	HemK methyltransferase family member 1, transcript variant X1	12.21	9.3	11.8	3.37	3.14	5.72	9.57	10.28	15.61
gene13926	LOC106042814	interferon-related developmental regulator 2-like	28.71	22.89	32.2	5.13	11.11	12.24	16.38	55.72	17.1
gene13927	LOC106042804	2'-5'-oligoadenylate synthase-like protein 2	190.94	10.9	716.61	32.28	50.51	9.25	348.22	877.97	14.1
gene13934	RBM5	RNA binding motif protein 5, transcript variant X1	370.79	285.2	311.23	69.29	136.04	152.86	300.62	266.36	374.95
gene1394	RHOV	ras homolog family member V	2.7	0.09	3.93	0.23	0.02	0.4	3.12	2.79	2.14
gene13981	STK17A	serine/threonine kinase 17a	92.23	69.93	56.03	27.65	23.48	22.27	63.21	54.1	124.78
gene13993	GCNT4	glucosaminyl (N-acetyl) transferase 4, core 2, transcript variant X2	27	37.03	35.87	8.21	11.56	12.45	26.93	29.09	22.44
gene13994	LOC106042924	uncharacterized LOC106042924	2.89	4	2.87	0.38	0.61	0.62	1.96	2.6	3.61
gene14021	DOCK8	dedicator of cytokinesis 8	40.35	36.19	25.38	4.33	5.13	11.43	14.15	13.75	47.97
gene14041	LOC106043005	uncharacterized LOC106043005	24.39	23.35	28.5	3.31	6.89	7.21	20.13	14.96	36.17
gene14042	INPPL1	inositol polyphosphate phosphatase-like 1	30.65	32.82	23.83	9.48	11.02	13.36	21.09	22.29	53.76
gene14046	KIF4A	kinesin family member 4A, transcript variant X1	10.6	11.55	9.39	1.13	1.22	1.09	5.64	5.68	13.16
gene14053	LOC106042993	putative P2Y purinoceptor 10	53.48	53.41	47.38	7.06	6.28	3.72	22.42	22.43	82.59
gene14055	GPR174	G protein-coupled receptor 174	15.96	12.62	8.8	2.39	2.42	2.04	6.55	8.38	19.76
gene14056	LOC106042997	uncharacterized LOC106042997, transcript variant X1	1.41	1.14	0.89	0.24	0.29	0.45	1.27	1.2	1.28
gene14064	LOC106042955	non-histone chromosomal protein HMG-14A-like	110.05	99.32	113.91	43.5	32.13	48.74	109.42	75.64	91.28
gene14075	LOC106042970	connector enhancer of kinase suppressor of ras 2-like, transcript variant X1	13.35	11.34	5.59	0.92	1.56	2.53	4.15	5.11	16.99
gene14080	POF1B	premature ovarian failure, 1B	128.6	5.15	191.5	6.1	6.06	7.37	181.87	76.07	98.7
gene14137	GNAO1	guanine nucleotide binding protein (G protein), alpha activating activity polypeptide O, transcript variant X1	3.3	2.21	2.17	0.61	0.89	0.52	5.46	3.08	2.17
gene14151	LOC106043125	uncharacterized LOC106043125	2.11	0.65	1.72	0.63	0.49	0.09	1.82	2.31	1.71
gene14165	LOC106043093	C3a anaphylatoxin chemotactic receptor-like	12.94	9.26	7.19	1.65	2.63	4.09	3.18	2.32	11.27
gene14167	ESRP2	epithelial splicing regulatory protein 2	8.98	0.02	11.48	0.22	0.3	0.53	9.9	15.42	5.58
gene1417	DGKZ	diacylglycerol kinase, zeta	34.33	28.78	23.93	7.77	9.67	12.92	16.03	19.66	32.58
gene14191	LOC106043089	uncharacterized LOC106043089, transcript variant X2	1.67	0.73	0.75	0.12	0.15	0.21	1.15	1.31	0.41
gene14201	EPCAM	epithelial cell adhesion molecule	16.76	3.5	27.37	1.31	0.55	1	16.21	26.19	13.5
gene14202	MSH2	mutS homolog 2	12.69	12.72	12.14	3.63	3.94	8.02	4.82	9.88	10.87
gene14223	LOC106043205	disintegrin and metalloproteinase domain-containing protein 33-like	25.14	23.43	15.28	4.87	2.61	7.38	12.35	12.94	32.98
gene14230	SMYD5	SMYD family member 5	24.46	26.49	23.3	9.32	8.72	12.6	16.47	34.88	23.24
gene14247	ATP6V1B1	ATPase, H+ transporting, lysosomal 56/58kDa, V1 subunit B1	3.55	1.73	2.64	0.28	0.27	0.27	1.7	1.89	1.55
gene14249	LOC106043214	uncharacterized LOC106043214	23.65	9.74	29.34	2.41	7.54	2.97	52.52	29.18	5.48
gene14258	NOP56	NOP56 ribonucleoprotein	65.99	52.84	54.83	20.6	25.54	33.33	56.94	80.95	51.72
gene14263	TTC31	tetratricopeptide repeat domain 31	31.46	23.06	33.34	7.98	17.95	16.59	29.85	38.91	25.33
gene14264	LOC106043196	zinc finger CCCH domain-containing protein 40-like	20.32	16.85	25.03	7.22	7.64	7.71	18.58	33.27	16.82
gene14267	LOC106043193	dedicator of cytokinesis protein 2-like	6.8	5.55	4.7	1.31	1.63	2.15	3.85	4.75	9.34
gene14268	LOC106043207	uncharacterized LOC106043207	2.54	0.39	1.4	0.07	0.07	0.07	1.2	0.78	0.65
gene14274	DOK1	docking protein 1, 62kDa (downstream of tyrosine kinase 1)	22.87	17.8	17.91	2.45	3.61	5.3	15.37	19.51	29.03
gene143	LOC106046439	chromosome unknown open reading frame, human C10orf128, transcript variant X1	16.93	13.78	6.26	2.33	4.49	6.29	3.28	4.87	14.09
gene14332	RINT1	RAD50 interactor 1, transcript variant X1	21.7	28.24	22.42	8.27	11.79	11.05	29.46	29.71	24.16
gene14344	LOC106043305	chromosome unknown open reading frame, human CXorf21, transcript variant X1	5.11	4.83	5.01	0.84	0.91	0.15	1.45	2.61	6.22
gene14384	BCL2A1	BCL2-related protein A1	19.82	16.68	16.24	1.72	3.45	4.27	9.78	8.15	23.65
gene1439	SPI1	Spi-1 proto-oncogene	170.35	103.95	131.85	43.52	46.99	45.18	139.54	102.92	166.64
gene144	VSTM4	V-set and transmembrane domain containing 4	8.26	4.32	6.68	0.97	2.2	3.07	5.54	10.48	6.42
gene1441	LOC106040826	transmembrane protein 178B-like	5.16	2.58	2.31	1.48	1.57	1.28	2.6	3.26	1.54
gene14419	HOMER2	homer scaffolding protein 2	1.38	0.46	1.43	0.51	0.26	0.36	1.3	1.87	0.96
gene14422	LOC106043360	uncharacterized LOC106043360, transcript variant X1	15.73	10.78	17.8	2.88	9.76	8.13	13.48	13.95	17.73
gene14433	LOC106043396	uncharacterized LOC106043396	27.92	6.84	13.92	1.15	8.61	1.63	6.15	1.76	36.87
gene14439	LOC106043423	uncharacterized LOC106043423	0.13	0.06	0.05	0.01	0	0	0.02	0.02	0.13
gene14449	MRPS6	mitochondrial ribosomal protein S6, transcript variant X1	72.46	54.05	100.28	31.76	33.98	40.85	66.08	63.31	62.21
gene14477	MIS18A	MIS18 kinetochore protein A	7.72	6.93	7.26	1.13	1.81	1.96	4.37	4.88	5.53
gene145	WDFY4	WDFY family member 4, transcript variant X2	18.78	16.09	15.2	1.63	2.28	2.56	7.39	5.96	31.99
gene14542	SPTSSB	serine palmitoyltransferase, small subunit B	26.14	0	24.8	0	0	0.47	19.53	18.47	7.54
gene14581	PLCH1	phospholipase C, eta 1	0.29	0.33	0.54	0.02	0.02	0	0.06	0.04	0.68
gene14605	SGIP1	SH3-domain GRB2-like (endophilin) interacting protein 1	0.78	0.17	0.54	0.08	0.01	0.01	0.42	0.98	1.14
gene14612	IL12RB2	interleukin 12 receptor, beta 2	1.48	0.93	1.4	0.06	0.2	0.08	0.55	2.51	1
gene14621	DEPDC1	DEP domain containing 1, transcript variant X1	10.58	12.06	12.49	4.65	4.01	4.85	8.11	5.89	13.67
gene14662	KIF23	kinesin family member 23	23.51	25.68	21.97	2.47	4.56	3.52	20.64	20.17	29.42
gene14690	TIPIN	TIMELESS interacting protein	15.47	10.7	16.72	1.91	3.23	5.85	9.57	11.94	14.99
gene14772	FAM64A	family with sequence similarity 64, member A, transcript variant X1	7.72	8.39	7.14	1.13	1.12	0.83	5.46	4.04	6.68
gene14784	RAP1GAP2	RAP1 GTPase activating protein 2	5.54	3.82	4.2	1.55	1.83	1.65	3.23	5.35	4.83
gene14815	LOC106043810	uncharacterized LOC106043810	3.54	4.08	6.7	1.23	1.03	0.66	10.79	7.8	2.88
gene14831	PSIP1	PC4 and SFRS1 interacting protein 1, transcript variant X1	34.85	30.51	28.9	9.44	13.64	19.15	32.29	26.6	53.31
gene14832	SNAPC3	small nuclear RNA activating complex, polypeptide 3, 50kDa	10.25	8.76	10.36	4.27	4.4	5.66	11.79	8.36	11.58
gene1484	RAG2	recombination activating gene 2, transcript variant X1	0.92	0.76	0.63	0.09	0.08	0.12	0.26	0.29	1.05
gene1485	RAG1	recombination activating gene 1	1.46	0.09	1.52	0.11	0.1	0.05	0.21	1.93	0.38
gene14856	IRF4	interferon regulatory factor 4	15.89	14.44	11.22	1.32	1.96	3.6	5.01	4.64	25.82
gene14888	CYTIP	cytohesin 1 interacting protein	48.83	41.07	28.12	11.19	6.96	7.74	32.56	27.52	69.7
gene14947	LOC106043945	uncharacterized LOC106043945, transcript variant X1	62.91	52.99	61.07	9.81	27.22	14.38	34.12	95.73	57.04
gene14952	NUP54	nucleoporin 54kDa	20.86	17.14	18.93	4.08	8.45	15.72	20.16	24.61	20.64
gene14963	DCK	deoxycytidine kinase	20.51	22.69	22.98	1.9	1.92	2.89	13.31	19.99	30.04
gene14975	UGT2B17	UDP glucuronosyltransferase 2 family, polypeptide B17, transcript variant X3	1.41	0.08	0.42	0	0.19	0.27	0.51	1.09	1.33
gene14978	LOC106043937	transmembrane protease serine 11E-like	0.86	0.05	0.83	0.14	0.2	0.36	0.85	0.92	0.54
gene14982	CENPC	centromere protein C	7.89	7.43	7.46	1.08	2.75	1.96	9.7	11.62	14.88
gene14995	SLITRK6	SLIT and NTRK-like family, member 6, transcript variant X1	1.21	0.06	1.94	0	0.02	0.07	0.97	1.91	0.88
gene15037	LOC106044035	uncharacterized LOC106044035	28.96	35.18	37.17	9.37	13.26	20.2	42.03	37.75	45.97
gene15067	FAM78A	family with sequence similarity 78, member A	29.64	24	19.56	4.45	5.69	5.64	11.6	15.08	49.85
gene15099	MED22	mediator complex subunit 22, transcript variant X1	32.49	26.97	11.45	5.14	4.86	9.31	18.37	17.59	29.38
gene15108	SLC2A6	solute carrier family 2 (facilitated glucose transporter), member 6	4.92	7.09	2.88	0.45	0.84	0.47	4.47	6.72	8.27
gene15127	CCDC36	coiled-coil domain containing 36, transcript variant X1	1.03	0.57	0.55	0.24	0.23	0.44	0.66	1.27	0.96
gene15132	ACER2	alkaline ceramidase 2, transcript variant X1	24.55	21.05	24.25	8.57	16.57	10.2	24.63	20.03	41.8
gene15149	OSTF1	osteoclast stimulating factor 1, transcript variant X1	175.77	161.42	164.08	55.25	65.64	65.43	203.83	148.23	237.62
gene15161	PSTPIP1	proline-serine-threonine phosphatase interacting protein 1	24.04	17.57	10.75	3.78	4.78	6.4	16.22	12.89	20.92
gene15178	PML	promyelocytic leukemia	32.55	13.42	57.43	5.17	8.55	6.38	35.47	67.17	15.83
gene15226	DYNLT1	dynein, light chain, Tctex-type 1	59.34	60.37	63.71	16.51	15.47	16.78	54.13	38.09	65.66
gene15230	TAGAP	T-cell activation RhoGTPase activating protein	52.79	44.2	30.13	10.25	11.52	9.51	24.23	18.14	63.11
gene15257	TNFRSF18	tumor necrosis factor receptor superfamily, member 18	22.04	23.99	18.17	2.26	2.81	2.62	21.42	36.87	58.34
gene15258	LOC106044313	rho guanine nucleotide exchange factor 7-like, transcript variant X1	17.47	20.56	20.64	1.36	1.19	1.2	4.84	7.5	21.6
gene15262	RNF223	ring finger protein 223	0.29	0.58	1.16	0	0.05	0	0.95	2.5	2.05
gene15263	LOC106044308	tyrosine-protein phosphatase non-receptor type 11-like	39.4	42.18	42.05	12.8	11.29	11.29	27.81	45.14	47.24
gene15282	PIK3CD	phosphatidylinositol-4,5-bisphosphate 3-kinase, catalytic subunit delta, transcript variant X2	27.96	24.53	15.88	5.63	11.12	10.76	9.6	8.88	35.68
gene15288	LOC106044297	uncharacterized LOC106044297, transcript variant X1	3.78	2.54	9.53	0	0.88	0.29	12.53	3.04	0.5
gene15303	ANLN	anillin actin binding protein	7.52	6.68	7.44	1.61	1.22	1	12.39	13.74	9.24
gene15308	GPR141	G protein-coupled receptor 141	3.39	5.07	3.45	0.52	0.36	1.72	2.16	4.09	5.87
gene15348	SFRP1	secreted frizzled-related protein 1	0.66	1.85	2.37	0.26	0.43	0.29	1.39	2.76	2.04
gene15389	TTI2	TELO2 interacting protein 2	19.04	13.8	19.91	5.07	4.35	7.28	12.87	14.86	16.66
gene1541	LOC106044856	fatty acid desaturase 1-like, transcript variant X1	49.02	0.05	40.34	0.25	0.45	1.21	25.06	21.35	12.24
gene15414	LOC106044440	uncharacterized LOC106044440	0.41	0.49	0.53	0.13	0.1	0.1	0.48	0.54	0.57
gene1542	LOC106044871	fatty acid desaturase 1-like	4.56	0	3.38	0.04	0	0.25	1.43	1.76	2.53
gene15423	GCNT1	glucosaminyl (N-acetyl) transferase 1, core 2, transcript variant X1	6.75	4.71	5.64	0.43	0.5	0.63	1.4	0.68	6.35
gene15424	LOC106044464	riboflavin kinase-like	26.81	20.75	23.43	7.1	6.48	12.38	32.3	35.25	30.55
gene15479	PTPRZ1	protein tyrosine phosphatase, receptor-type, Z polypeptide 1	8.36	3.59	6.73	0.63	1.78	1.78	4.17	5.51	3.14
gene15544	LOC106044634	lysophosphatidic acid receptor 6-like, transcript variant X3	8.15	14.96	2.82	1.2	1.24	3.98	5.3	5.28	23.69
gene15547	LOC106044607	taste receptor type 1 member 3	6.27	0.65	0.17	0.04	0.06	0.25	0.64	2.33	3.26
gene15555	TMEM88B	transmembrane protein 88B	0.77	0.06	0.35	0	0	0.07	0.39	0.86	0.56
gene15620	PLEK	pleckstrin, transcript variant X1	41.54	34.79	42.51	7.28	12.08	10.89	14.33	16.81	36.89
gene15621	CNRIP1	cannabinoid receptor interacting protein 1	2.77	1.6	3.16	0.26	0.59	0.87	2.24	0.81	0.78
gene15624	WDR92	WD repeat domain 92, transcript variant X1	33.53	23.32	21.76	7.69	8.19	12.1	27.2	23.56	34.12
gene15645	SLC1A4	solute carrier family 1 (glutamate/neutral amino acid transporter), member 4	14.14	12.88	13.59	2.63	3.99	6.42	12.36	14.32	16.66
gene15679	LOC106044744	uncharacterized LOC106044744, transcript variant X5	2.4	3.28	1.8	0.23	0.45	1.12	0.86	1.41	4.88
gene15688	MGME1	mitochondrial genome maintenance exonuclease 1, transcript variant X3	11.23	8.25	8.99	1.11	2.48	5.7	8.8	11.82	9.87
gene15689	OVOL2	ovo-like zinc finger 2	3.8	0.05	5.42	0.06	0	0.06	3.26	13.16	1.34
gene157	ANXA8L1	annexin A8-like 1, transcript variant X5	63.2	0.35	83.31	1.01	0.3	1.43	53.35	46.17	28.98
gene15705	LOC106044797	cytochrome P450 2J6-like	19.46	0	16.51	0.06	0	0.17	9.8	12.35	6.75
gene15706	LOC106044777	cytochrome P450 2J6-like, transcript variant X1	2.11	0.16	1.71	0.11	0.1	0	0.86	3.83	1.78
gene15726	B3GNT7	UDP-GlcNAc:betaGal beta-1,3-N-acetylglucosaminyltransferase 7	0.5	0.38	1.22	0.08	0.07	0.15	1.84	1.94	0.33
gene15745	PDCD1	programmed cell death 1	13.74	11.92	11.59	0.67	0.78	0.49	19.04	6.85	17.17
gene15751	BCL6	B-cell CLL/lymphoma 6	54.5	51.91	40.26	15.11	25.57	26.6	40.85	40.94	58.86
gene15756	TP63	tumor protein p63, transcript variant X1	14.51	1.57	15.93	0.72	0.53	0.62	11.73	33.83	8.59
gene15761	HSD17B2	hydroxysteroid (17-beta) dehydrogenase 2	2.21	0	2.32	0	0.11	0.22	0.36	0.53	0.67
gene15783	COTL1	coactosin-like F-actin binding protein 1	587.88	572.37	399.04	175.84	181.44	225.18	491.95	280.68	633.35
gene15810	TNFSF13B	tumor necrosis factor (ligand) superfamily, member 13b	20.99	26.51	11.64	3.27	2.69	2.05	10.68	5.29	44.2
gene15833	ATP8B1	ATPase, aminophospholipid transporter, class I, type 8B, member 1, transcript variant X3	1.58	0.49	1.97	0.03	0.19	0.32	2.64	3.9	1.16
gene15857	HAUS8	HAUS augmin-like complex, subunit 8	13.26	14.1	11.98	5.54	5.69	8.67	14.96	15.22	15.48
gene15877	LOC106044980	uncharacterized LOC106044980, transcript variant X2	1.77	0.27	2.47	0.19	0.21	0.21	1.06	3.81	0.49
gene15885	LOC106045004	perilipin-3-like	12.45	0.15	12.53	0.55	0.34	0.62	5.93	1.73	3.38
gene15892	LOC106044971	cathepsin L1-like, transcript variant X1	90.54	73.97	53.39	15.78	13.91	14.86	23.4	40.66	92.57
gene15914	NMRK2	nicotinamide riboside kinase 2	32.9	43.93	53.22	5.52	5.19	3.09	17.72	18.77	36.92
gene15921	FBN3	fibrillin 3, transcript variant X4	0.23	1.17	0.26	0.07	0.08	0.03	0.44	0.51	0.14
gene15923	LOC106044958	ceramide synthase 4-like	4.79	0	6.49	0	0	0.77	8.02	12.48	5.94
gene15946	EPB41L4B	erythrocyte membrane protein band 4.1 like 4B	2.43	0.12	1.27	0.1	0.2	0.24	1.27	1.46	1.37
gene15958	LOC106045075	uncharacterized LOC106045075	371.74	302.25	512.68	168.84	143.94	175.59	406.3	234.41	189
gene15973	CCDC37	coiled-coil domain containing 37, transcript variant X1	2.52	2.02	2.28	0.57	0.91	0.68	2.52	1.97	1.53
gene15997	CKS2	CDC28 protein kinase regulatory subunit 2	22.63	9.2	19.19	0.48	0.45	1.18	32.13	24.6	23.05
gene16003	DIRAS2	DIRAS family, GTP-binding RAS-like 2, transcript variant X2	11.28	0.61	14.73	0.57	0.63	1.01	6.33	4.42	5.66
gene16004	SYK	spleen tyrosine kinase	18.43	13	16.81	3.41	3.36	3.99	13.2	12.94	27.03
gene16015	CDC42SE2	CDC42 small effector 2, transcript variant X1	92.38	84.13	100.98	30.08	31.16	47.88	66.55	88.77	121.25
gene16021	LOC106045119	transcription factor E2F2-like	1.03	0.86	1.42	0.35	0.13	0.07	1.29	1.59	2.41
gene16026	LOC106045147	uncharacterized LOC106045147	40.54	32.57	45.81	15.27	8.44	13.5	14.6	36.51	18.51
gene16122	SHTN1	shootin 1, transcript variant X1	3.06	0.83	3.63	0.15	0.69	0.45	2.27	4.33	4.03
gene16184	LOC106045325	B-cell scaffold protein with ankyrin repeats-like	4.89	2.82	1.89	1.21	0.98	1.23	2.95	2.8	4
gene16194	CENPE	centromere protein E, 312kDa	4.14	4.58	2.67	0.37	0.39	0.28	1.4	0.9	5.08
gene16206	LOC106045314	uncharacterized LOC106045314	0.95	0.36	1.44	0.12	0.45	0.31	0.34	1.28	1.55
gene16210	INTS12	integrator complex subunit 12, transcript variant X1	12.71	12.67	13.58	4.93	4.14	6.38	10.01	16.05	12.1
gene16220	DKK2	dickkopf WNT signaling pathway inhibitor 2, transcript variant X1	3.01	1.64	1.87	0.1	0.14	0.35	1.42	2.02	2.46
gene16232	LOC106045365	fructose-1,6-bisphosphatase 1-like	30.05	25.51	39.27	7.93	7.12	8.42	19.42	20.9	34.49
gene16236	DAPK1	death-associated protein kinase 1, transcript variant X1	36.95	30.5	22.79	11.61	14.48	19.19	37.72	17.05	41.74
gene1625	CENPM	centromere protein M	11.98	9.61	13.96	5.19	5.58	4.64	10.96	8.95	12.75
gene1626	TNFRSF13C	tumor necrosis factor receptor superfamily, member 13C, transcript variant X1	3.46	4.29	5.67	0.1	0.1	0.27	0.46	0.49	7.03
gene16261	FRMD3	FERM domain containing 3, transcript variant X1	0.55	0.14	0.19	0	0	0.07	0.21	0.65	0.25
gene16269	LOC106045430	CMP-N-acetylneuraminate-beta-galactosamide-alpha-2,3-sialyltransferase 2-like, transcript variant X2	12.22	10.08	5.77	2.12	2.24	3.04	6.38	6.47	13.19
gene16281	SLA2	Src-like-adaptor 2	7.77	5.93	2.48	1.56	2.1	1.51	1.91	3.42	7.27
gene16296	LOC106045440	uncharacterized LOC106045440, transcript variant X2	3.34	1.75	1.94	0.66	0.68	0.82	2.31	2.8	2.96
gene16353	NEUROD6	neuronal differentiation 6, transcript variant X1	0.54	1.24	0.37	0.03	0.16	0.16	0.15	0.15	1.76
gene16361	LOC106045509	uncharacterized LOC106045509	58.43	42.62	18.48	13.12	9.27	10.3	27.68	12.68	43.6
gene16381	DTX1	deltex 1, E3 ubiquitin ligase	3.79	2.86	2.27	0.45	0.57	0.42	1.38	1.16	4.44
gene16406	LOC106045559	adrenodoxin-like, transcript variant X1	11.22	12.45	7.07	0.43	0.82	3.47	3.92	3	11.39
gene16458	LMNB2	lamin B2, transcript variant X1	24.96	24.83	19.95	14.21	9.52	13.59	23.8	31.64	31.02
gene16460	RPL36	ribosomal protein L36	403.98	350.98	503.16	189.45	169.24	186.36	407.94	297.27	335.25
gene16471	LOC106045675	uncharacterized LOC106045675	1.8	3.33	5.12	0.25	1.55	0.4	0.97	6.21	1.03
gene16475	NDUFA7	NADH dehydrogenase (ubiquinone) 1 alpha subcomplex, 7, 14.5kDa	51.73	43.22	49.17	20.86	8.74	28.36	49.4	30.96	24.02
gene16477	LOC106045698	bone morphogenetic protein 2-like	1.28	1.08	0.72	0.12	0.24	0.27	1.41	0.97	0.85
gene16487	LOC106045683	mucosa-associated lymphoid tissue lymphoma translocation protein 1-like, transcript variant X1	19.51	25.75	18.33	2.95	3.67	5.46	10.3	8.74	26.61
gene165	44993	membrane-associated ring finger (C3HC4) 8, E3 ubiquitin protein ligase, transcript variant X2	21.73	18.42	11.81	7.91	4.98	10.61	16.97	22.72	26.35
gene16511	ATP8B3	ATPase, aminophospholipid transporter, class I, type 8B, member 3, transcript variant X1	1.06	0.34	1.04	0.05	0	0.2	1.07	2.79	0.72
gene16539	FAM46C	family with sequence similarity 46, member C	19.28	20.73	11.84	0.67	1.06	1.06	5.02	4.45	58.54
gene16540	DUSP12	dual specificity phosphatase 12	21.62	16.39	19.8	4.74	7.69	7.83	13.08	13.1	17.19
gene16548	CTC1	CTS telomere maintenance complex component 1, transcript variant X1	20.8	17.43	15.29	4.43	7.42	9.88	18.61	15.1	24.98
gene16559	GPR156	G protein-coupled receptor 156	3.93	4.41	3.98	0.81	1.54	0.99	1.76	3.15	3.06
gene16565	SMG8	SMG8 nonsense mediated mRNA decay factor	7.92	5.28	6.37	1.54	1.61	2.9	4.83	7.67	8.25
gene16566	PRR11	proline rich 11, transcript variant X1	9.12	10.39	11.79	3.82	3.05	3.1	8.62	8.38	10.68
gene16574	DOC2B	double C2-like domains, beta	1.23	2.47	1.44	0.54	0.34	0.59	1.68	0.73	2.5
gene16579	GEMIN4	gem (nuclear organelle) associated protein 4	5.68	1.82	6.55	0.46	0.76	0.44	5.28	6.73	3.05
gene16584	LOC106045816	multidrug and toxin extrusion protein 2-like	5.9	5.05	6.95	1.61	1.77	2.01	2.18	5.06	6.86
gene16594	TRPV3	transient receptor potential cation channel, subfamily V, member 3, transcript variant X3	1.83	0.28	1.21	0.25	0.5	0.51	1.14	1.67	0.73
gene16602	GSG2	germ cell associated 2 (haspin)	3.56	4.78	4	0.71	1.16	1.01	2.47	2.33	4.38
gene16610	LOC106045801	uncharacterized LOC106045801, transcript variant X1	0.47	0.54	0	0.1	0	0	0.06	0.75	0.79
gene16645	CCND3	cyclin D3	10.97	12.33	8.59	2.61	1.99	2.5	5.08	10.49	12.69
gene16647	MED20	mediator complex subunit 20	21.31	22.95	23.62	9.41	8.35	11.79	15.08	13.58	16.36
gene16660	DENND2D	DENN/MADD domain containing 2D	15.68	10.66	17.78	1.77	1.99	2.19	6.89	12.95	13.75
gene16667	LOC106045877	alpha-1,3-mannosyl-glycoprotein 4-beta-N-acetylglucosaminyltransferase C-like, transcript variant X4	6.99	6.98	4.43	1.48	1.84	1.53	2.3	3.41	7.7
gene16670	PKP1	plakophilin 1, transcript variant X1	47.24	0.11	55.9	0.18	0.29	1.06	53.38	85.31	29.77
gene16672	LAD1	ladinin 1, transcript variant X1	3.76	0.03	5.61	0	0	0.06	3.47	12.92	2.22
gene16684	LOC106045884	tubulin alpha-8 chain	76.73	59.47	77.93	19.5	11.64	25.31	52.51	60.99	47.3
gene1671	E2F7	E2F transcription factor 7, transcript variant X1	2.39	1.63	1.77	0.34	0.42	0.52	1.94	1.59	3.21
gene1672	CSRP2	cysteine and glycine-rich protein 2	38.37	14.57	40.42	8.01	4.31	27.36	29.16	69.69	28.07
gene16746	LIMD2	LIM domain containing 2, transcript variant X1	170.96	182.79	115.97	19.99	26.47	27.61	50.68	80.69	225.48
gene16780	LOC106046001	von Willebrand factor A domain-containing protein 5A-like, transcript variant X1	0.67	0.62	0.35	0.03	0.11	0.08	0.18	0.12	0.75
gene16782	LOC106045971	T-cell receptor alpha chain C region-like isoform X9	213.6	261.3	121.04	12.96	21.78	22.74	56.67	42.36	295.39
gene16801	PRKCB	protein kinase C, beta, transcript variant X1	51.14	30.82	25.31	12.86	13.67	13.1	28.53	18.86	53.25
gene16810	PLK1	polo-like kinase 1	14.57	15.91	13.98	1.63	1.25	1.67	6.57	6.39	15.33
gene16822	LOC106046024	heparan sulfate glucosamine 3-O-sulfotransferase 4-like	1.13	0.27	2.06	0.07	0.24	0.5	1.08	2.01	0.34
gene16828	KDM8	lysine (K)-specific demethylase 8	22.51	15.88	18.11	1.91	4.78	11.72	11.84	14.33	14.38
gene16831	IL21R	interleukin 21 receptor, transcript variant X4	17.83	12.98	8.56	1.61	1.57	1.49	9.86	20.53	31.05
gene16832	LOC106046046	interleukin-9 receptor-like, transcript variant X1	5.65	3.64	1.97	0.99	0.51	1.26	3.35	8.1	3.13
gene16847	LOC106046070	probable E3 ubiquitin-protein ligase HERC4	40.89	9.89	67.89	11.88	16.56	14.44	58.9	96.38	13.57
gene16861	DUSP4	dual specificity phosphatase 4	5.68	2.17	4.62	0.9	0.93	0.47	2.61	11.29	4.3
gene16887	UBE2T	ubiquitin-conjugating enzyme E2T, transcript variant X1	31.88	38.68	30.65	9.57	10.67	11.72	21.39	23.68	23.46
gene16890	DRAM2	DNA-damage regulated autophagy modulator 2, transcript variant X1	94.97	97.65	83.54	39.81	46.04	44.5	88.86	53.23	82.76
gene16891	CEPT1	choline/ethanolamine phosphotransferase 1, transcript variant X2	67.55	57.08	54.71	21.81	25.3	42.07	55.86	80.46	70.93
gene16893	NFYA	nuclear transcription factor Y, alpha, transcript variant X1	42.72	42.08	39.54	11.69	22.46	27.85	48.11	49.46	52.2
gene16924	DEF6	DEF6 guanine nucleotide exchange factor	49.35	45.88	31.38	21.47	21.43	19.73	41.61	40.57	81.52
gene16927	FANCE	Fanconi anemia, complementation group E	2.66	3.61	2.77	0.22	0.46	0.46	1.45	1.42	4
gene16928	LOC106046127	protein-methionine sulfoxide oxidase MICAL1-like	48.42	57.74	25.71	9.31	20.14	31.35	47.38	49.72	75.2
gene16929	SMPD2	sphingomyelin phosphodiesterase 2, neutral membrane (neutral sphingomyelinase)	69.32	81.22	64.98	13.46	21.08	33.49	75.51	66.48	105.01
gene16950	KIF21B	kinesin family member 21B	5.34	5.55	3.63	0.69	1.23	1.13	1.22	1.58	7.75
gene16951	LOC106046139	ras-associated and pleckstrin homology domains-containing protein 1-like	6.91	6.74	5.23	0.63	0.67	1.25	1.87	1.83	7.69
gene16955	LOC106046186	tyrosine-protein phosphatase non-receptor type 7-like	33.68	29.1	18.18	1.97	2.32	5.27	6.08	4.47	35.12
gene16970	MCM10	minichromosome maintenance complex component 10, transcript variant X1	3.27	3	2.73	0.42	0.15	0.14	1.02	1.08	2.56
gene17031	TGFA	transforming growth factor, alpha	0.26	2.47	1.5	0	0.28	0	3.18	6.34	1.5
gene17032	SNRPG	small nuclear ribonucleoprotein polypeptide G	199.99	169.7	167.43	64.4	76.97	97.62	189.98	183.05	134.88
gene17055	LOC106046305	NKG2-A/NKG2-B type II integral membrane protein-like	27.81	24.95	27.59	11.91	12.92	10.73	15.11	12.13	31.04
gene17057	LOC106046310	killer cell lectin-like receptor subfamily F member 1	5.17	3.56	2	0.29	0.18	0.41	0.72	1	2.64
gene17107	TMEM71	transmembrane protein 71, transcript variant X2	5.16	6.41	3.65	1.13	1.8	1.43	4.63	5.38	12.96
gene17133	ERMP1	endoplasmic reticulum metallopeptidase 1	9.35	3.45	10.19	2.31	2.75	3.46	5.17	5.97	5.96
gene17135	PDCD1LG2	programmed cell death 1 ligand 2, transcript variant X1	10.64	5.82	6.53	1.1	1.79	0.7	6.06	1.56	14.04
gene17136	LOC106046390	programmed cell death 1 ligand 1-like, transcript variant X3	9.7	4.13	5.6	0.85	2.23	1.7	5.26	9.39	13.73
gene17183	TFDP1	transcription factor Dp-1, transcript variant X1	31.78	30.18	27.72	13.08	11.91	15.34	20.2	21.69	31.02
gene17233	LOC106046506	uncharacterized LOC106046506	1.41	0.32	1.4	0.09	0	0.29	0.09	0.38	2.15
gene17258	LOC106046522	sulfotransferase family cytosolic 2B member 1-like	7.02	10.47	13.7	3.04	3.17	4.99	6.17	14.47	7.22
gene17304	XKR8	XK, Kell blood group complex subunit-related family, member 8	6.17	5.39	5.41	1.69	1.68	2.27	6.55	6.31	4.76
gene17307	THEMIS2	thymocyte selection associated family member 2	10.63	7.2	10.55	1.96	3.28	2.77	7.49	7.28	10.46
gene17310	LOC106046582	cbp/p300-interacting transactivator 3	135.77	86.14	100.37	35.72	40.96	43.22	52.26	83.64	110.71
gene17311	LOC106046563	oxysterol-binding protein 2-like	3.32	1.7	4.86	0.65	1.55	0.66	1.8	1.31	2.42
gene17313	LOC106046581	CTP synthase 1-like	20.56	20.13	16.25	6.82	9.2	15.02	17.41	31.3	19.98
gene17316	EDN2	endothelin 2	14.63	52.25	41.86	13.02	12.28	5.74	36.62	33.8	82.76
gene17323	LOC106046592	cadherin-1-like	24.36	1.75	28.14	0.06	0.26	0.19	35.02	82.8	14.84
gene17347	PMFBP1	polyamine modulated factor 1 binding protein 1, transcript variant X1	3.87	3.79	4.21	1.47	1.74	1.45	3.5	4.73	5.66
gene17369	LOC106046649	uncharacterized LOC106046649, transcript variant X2	40.05	26.76	25.76	9.46	11.72	17.2	23.15	19.85	34.5
gene17381	ASTE1	asteroid homolog 1 (Drosophila)	7.72	6.05	6.58	2.58	2.75	4.59	5.04	6.41	8.62
gene17387	LOC106046668	prostatic acid phosphatase-like, transcript variant X2	1.7	0.21	1.94	0.03	0.1	0.59	2.99	0.62	2.41
gene1739	HMGA2	high mobility group AT-hook 2, transcript variant X1	0.68	0	1.98	0	0.06	0.31	1.43	2.87	0.39
gene17395	SMARCA5	SWI/SNF related, matrix associated, actin dependent regulator of chromatin, subfamily a, member 5, transcript variant X1	47.47	40.23	32.8	12.77	13.21	21.21	44.49	55.42	62.15
gene17406	TBC1D9	TBC1 domain family, member 9 (with GRAM domain), transcript variant X1	7.58	2.72	3.87	1.46	1.68	1.81	3.81	6.12	9.83
gene17411	CLGN	calmegin, transcript variant X3	9.75	7.67	7.89	0.87	0.88	1.01	3.07	2.7	10.49
gene17451	RNF213	ring finger protein 213	35.97	9.13	47.14	6.25	13.66	8.62	35.2	70.94	11.65
gene17458	CBX8	chromobox homolog 8, transcript variant X1	12.57	10.3	8.94	3.41	5.74	7.6	14.26	10.88	12.45
gene17463	ENGASE	endo-beta-N-acetylglucosaminidase	6.34	4.36	7.29	2.91	2.59	2.36	5.29	7.77	6.69
gene17473	TK1	thymidine kinase 1, soluble	62.46	71.13	45.11	13.93	16.15	15.32	31.14	27.88	55.93
gene17476	LOC106046794	uncharacterized LOC106046794	101.12	42.11	186.48	27.72	43.1	42.8	131.32	172.08	38.29
gene17506	LOC106046813	GTPase IMAP family member 1-like	4.69	3.16	3	0.14	0.36	0.4	0.88	1.18	4.23
gene17507	LOC106046816	GTPase IMAP family member 4-like	115.23	147.53	161.46	10.36	11.68	8.13	37.02	33.52	155.44
gene17512	CDC25A	cell division cycle 25A	7.54	5.84	6.48	3.25	2.2	2.95	5.1	6.65	6.93
gene17522	LOC106046814	GTPase IMAP family member 2-like	30.16	20.96	28.76	4.38	8.02	8.02	26.62	26.84	20.11
gene17529	NBEAL2	neurobeachin-like 2	45.04	36.15	31.21	8.34	13.57	14.4	18.82	33.34	45.41
gene17530	CCDC12	coiled-coil domain containing 12, transcript variant X1	63.52	46.32	72.23	25.76	26.49	34.96	34.31	59.48	41.08
gene17608	CD79B	CD79b molecule, immunoglobulin-associated beta, transcript variant X1	62.24	66.54	63.02	5.45	5.22	6.18	6.83	18.27	88.27
gene17609	LOC106046928	uncharacterized LOC106046928, transcript variant X1	13.34	13.03	12.31	2.96	2.47	4.15	5.15	3.48	14.72
gene17612	ARHGAP27	Rho GTPase activating protein 27	22.22	19.91	15.65	3.3	3.19	4.19	7.86	18.58	29.4
gene17622	FMNL1	formin-like 1	41.84	32.69	30.54	5.23	7.82	7.68	24.14	33.8	56.71
gene17687	LOC106047000	uncharacterized LOC106047000	0.96	0.88	0.2	0.26	0.19	0.15	0.27	0.95	1.64
gene17689	RCOR1	REST corepressor 1	41.94	29.38	29.88	12.52	14.56	18.06	33.38	44.5	46.52
gene17700	HSP90AA1	heat shock protein 90kDa alpha (cytosolic), class A member 1	1602.78	1356.02	1705.04	117.6	94.88	161.73	3617.29	2880.62	3694.44
gene17712	LOC106047031	interferon-induced transmembrane protein 3-like	0.84	0.15	8.23	0	0.18	0.17	7.01	7.42	0.19
gene17713	B4GALNT4	beta-1,4-N-acetyl-galactosaminyl transferase 4	11.52	2.49	12.07	2.05	2.62	3.48	5.83	20.44	4.7
gene17714	PKP3	plakophilin 3, transcript variant X1	13.3	0	16.77	0	0	0.09	12.07	15.39	8.25
gene17717	ANO9	anoctamin 9, transcript variant X1	1.76	0.27	1.75	0.05	0.11	0.23	1.16	0.94	0.78
gene17732	LOC106047038	chromosome unknown open reading frame, human C15orf62, transcript variant X2	1.05	0.61	1.68	0.21	0.45	0.42	1.51	0.94	1.23
gene17738	CASC5	cancer susceptibility candidate 5	4.34	4.6	3.69	1.14	1.03	0.96	1.87	1.82	4.84
gene17751	KNSTRN	kinetochore-localized astrin/SPAG5 binding protein	27.41	23.64	28.87	8.25	5.52	7.68	13.03	11.22	24.25
gene17779	ZNF750	zinc finger protein 750	3.88	0.06	5.47	0.11	0.2	0.25	2.89	1.89	2.68
gene17801	LOC106047112	uncharacterized LOC106047112	46.48	29.65	23.64	2.34	5.35	3.5	21.79	6.5	28.59
gene17804	TPX2	TPX2, microtubule-associated, transcript variant X1	22.67	19.89	19.84	3.19	1.96	2.05	9.05	9.28	22.87
gene17812	HCK	HCK proto-oncogene, Src family tyrosine kinase	8.37	7.02	3.77	2	1.97	3.55	5.04	7.64	13.62
gene17814	LOC106047154	uncharacterized LOC106047154	1.73	1.11	1.67	0.68	0.79	1.01	1.83	1.93	1.65
gene17815	PLAGL2	pleiomorphic adenoma gene-like 2, transcript variant X1	5.64	5.2	4.64	2.06	1.97	2.84	5.37	7.08	8.08
gene17852	NCOA5	nuclear receptor coactivator 5, transcript variant X1	30.39	23.21	24.36	10.85	13.85	16.03	25.72	35.49	29.61
gene17853	CD40	CD40 molecule, TNF receptor superfamily member 5	26.17	22.68	19.84	5.65	7.86	12.76	20.57	32.42	33.82
gene17860	CCNDBP1	cyclin D-type binding-protein 1, transcript variant X1	66.6	60.83	80.22	19.48	21.6	39.89	62.01	86.24	75.36
gene17863	LOC106047158	protein-glutamine gamma-glutamyltransferase 6-like, transcript variant X1	0.45	0.08	1.34	0.1	0.03	0.22	1.17	0.67	0.7
gene17898	LOC106047213	uncharacterized LOC106047213, transcript variant X3	0.67	1.21	0.98	0.25	0	0.1	0.72	0.22	0.38
gene17906	ACOT7	acyl-CoA thioesterase 7	65.46	47.52	81.2	18.68	21.54	21.52	70.16	107.06	39.23
gene17908	TNFRSF25	tumor necrosis factor receptor superfamily, member 25	1.18	1.62	1.67	0.12	0.33	0.44	1.44	3.07	2.19
gene17923	TNFRSF9	tumor necrosis factor receptor superfamily, member 9	19.59	12.63	16.37	5.9	7.11	9.12	14.76	15.4	22.66
gene17954	ENDOG	endonuclease G	14.7	16.47	10.22	2.49	2.79	6.37	14.28	20.86	13.13
gene17963	GLE1	GLE1 RNA export mediator	17.17	14.73	14.37	5.74	6	7.68	13.96	16.53	16.31
gene17964	ODF2	outer dense fiber of sperm tails 2, transcript variant X1	18.47	19.03	15.6	5.56	6.54	8.47	13.52	13.26	18.88
gene18003	TCERG1L	transcription elongation regulator 1-like	0.6	0.94	2.6	0	0	0.05	0.15	0.68	0.68
gene18014	FANCC	Fanconi anemia, complementation group C, transcript variant X1	1.37	1.16	1.75	0.61	0.34	0.46	0.85	0.71	3.55
gene18015	LOC106047346	chromosome unknown open reading frame, human C9orf3	113.49	40.99	113.5	27.4	23.04	54.06	91.26	140.88	61.29
gene18079	GRAMD2	GRAM domain containing 2	11.3	8.56	10.23	3.7	3.96	4.19	8.77	9.85	8.47
gene18090	SNX22	sorting nexin 22, transcript variant X1	6.14	2.56	4.12	0.45	0.44	0.49	2.52	2.48	6.03
gene18099	DUOX2	dual oxidase 2	0.9	0	1.07	0	0	0.04	0.84	1.56	0.52
gene18101	LOC106047427	dual oxidase maturation factor 1-like	3.35	0	3.79	0	0	0.25	3.39	7.75	1.01
gene18118	LOC106047475	chromosome unknown open reading frame, human C11orf85, transcript variant X1	4.24	7.42	3.86	2.31	1.48	2.68	4.58	12.13	3.02
gene18134	LOC106047481	proline dehydrogenase 1, mitochondrial-like	67.58	73.39	73.55	19.74	24.05	34.94	46.41	92.66	75.4
gene18157	LOC106047513	exocyst complex component 1-like, transcript variant X2	10.61	7.33	5.72	0.52	1.22	1.27	1.6	1.84	10.3
gene18158	GLOD5	glyoxalase domain containing 5	4.58	1.81	2.68	0	0.13	0	0.43	0.43	3.07
gene18166	ZNF185	zinc finger protein 185 (LIM domain), transcript variant X1	3.77	0.11	5.6	0.12	0.19	0.1	4.23	2.42	1.99
gene18181	LOC106047531	F-box only protein 21-like, transcript variant X1	25.54	25.1	29.04	0.81	0.5	1.78	2.81	1.8	36.49
gene18225	DCBLD1	discoidin, CUB and LCCL domain containing 1, transcript variant X1	4.92	3.73	4.55	0.49	1.84	2.91	4.37	7.72	4.87
gene18264	LOC106047630	ADP-ribosylation factor-like protein 8B	1.18	0.66	8.14	0.33	0.78	1.5	5.33	5.18	1.03
gene18281	MTHFD2	methylenetetrahydrofolate dehydrogenase (NADP+ dependent) 2, methenyltetrahydrofolate cyclohydrolase, transcript variant X1	60.93	43.94	40.84	17.41	13.88	20.06	59.77	72.65	54.18
gene18285	NCAPH	non-SMC condensin I complex, subunit H	19.82	18.63	19.35	3.43	4.79	5.34	12.23	12.88	20.27
gene18291	GKN1	gastrokine 1	2.49	1.14	1.29	0.1	0.48	0.47	2.99	0.83	2.1
gene18295	ARHGAP25	Rho GTPase activating protein 25	26.25	21.88	18.34	5.49	7.52	10.56	17.22	11.29	30.24
gene18300	RASSF2	Ras association (RalGDS/AF-6) domain family member 2	96.21	78.06	55.61	24.25	27.83	33.57	72.56	48.68	116.69
gene18302	PROM2	prominin 2	15.59	0	14.14	0	0	0.04	10.06	18.25	6.63
gene18311	GPR87	G protein-coupled receptor 87	5.22	0.1	4.56	0	0	0.11	6.15	10.88	2.18
gene18316	LOC106047700	protein FAM188B2, transcript variant X1	0.32	0.44	2.23	0	0	0.07	0.12	0.57	1.22
gene18317	SIAH2	siah E3 ubiquitin protein ligase 2	56.1	52.43	65.2	17.02	13.78	17.04	56.94	76.72	91.1
gene18341	ENDOU	endonuclease, polyU-specific	3.04	0.33	2.13	0	0.05	0	5.76	7.11	3.14
gene18344	LOC106047723	twist-related protein 2-like	18.07	6.15	7.79	2.07	3.22	0.72	6.06	19.17	4.05
gene18347	RACGAP1	Rac GTPase activating protein 1, transcript variant X2	19.54	18.29	21.1	3	2.17	2.02	9.67	7.74	18.68
gene18385	EDEM2	ER degradation enhancer, mannosidase alpha-like 2	39.5	20.21	42.99	15.88	16.16	12.95	43.86	32.26	40.95
gene18388	TOX2	TOX high mobility group box family member 2	5.78	4.58	3.76	0.34	1.09	1.22	1.66	1.18	5.57
gene18392	E2F1	E2F transcription factor 1	8.9	12.57	9.72	4.19	3.42	1.69	6.99	7.59	12.91
gene18397	MIS18BP1	MIS18 binding protein 1	2.85	2.91	2.52	0.37	0.26	0.34	2.87	1.72	4.61
gene18422	UCK2	uridine-cytidine kinase 2	16.88	12.01	15.17	6.08	7.41	7.49	14.42	21.95	12.28
gene18427	NUF2	NUF2, NDC80 kinetochore complex component	12.42	10.11	9.62	0.99	1	1.14	5.13	6.1	10.16
gene18430	RNF222	ring finger protein 222, transcript variant X1	1.29	0	3.49	0	0	0.05	2.29	1.96	1.1
gene18452	EPHA1	EPH receptor A1	2.5	0.02	3.1	0	0.22	0.13	1.7	2.22	1.21
gene18465	PTPN6	protein tyrosine phosphatase, non-receptor type 6, transcript variant X1	67.59	55.99	43.86	8.21	7.13	14.23	30.87	28.56	87.1
gene18472	CDCA3	cell division cycle associated 3	45.99	55.33	52.89	2.91	2.19	0.93	47.92	27.39	51.12
gene18476	CD4	CD4 molecule, transcript variant X2	34.45	46.92	25.33	0.84	2.23	3.53	10.59	11.68	62.38
gene18477	LAG3	lymphocyte-activation gene 3	17.78	4.45	13.16	1.45	1.02	0.96	11.28	18.82	8.86
gene18484	ACRBP	acrosin binding protein	0.94	0.31	0.12	0	0	0.04	0.09	0.04	0.18
gene18486	LPAR5	lysophosphatidic acid receptor 5, transcript variant X4	18.75	14.67	9.09	0.88	0.52	0.91	3.65	2.85	13.61
gene18493	NCAPD2	non-SMC condensin I complex, subunit D2	16.66	15.32	13.75	4.92	6.53	6	6.32	8.86	18.13
gene18509	AIM1L	absent in melanoma 1-like	2.67	0.13	1.82	0.1	0	0.22	3.47	1.59	1.43
gene18515	RPS6KA1	ribosomal protein S6 kinase, 90kDa, polypeptide 1, transcript variant X1	54.63	43.79	29.21	15.4	13.59	16.07	20.67	26.75	54.2
gene18521	ZDHHC18	zinc finger, DHHC-type containing 18, transcript variant X1	19.84	14.8	16.16	5.56	6.24	8.4	16.14	21.13	18.87
gene18522	SFN	stratifin	166.51	0	230.99	0	0	2.3	176.8	438.97	62.79
gene18527	KDF1	keratinocyte differentiation factor 1	2.01	0.25	2.63	0.14	0.34	1.01	1.4	3.01	0.99
gene18541	LOC106047894	digestive cysteine proteinase 1-like	20.56	7.35	16.57	1.32	2.93	2.78	14.98	15.26	14.72
gene18546	LOC106047901	uncharacterized LOC106047901	8.01	2.76	11.96	0.82	2.65	2.79	5.06	20.35	4.29
gene18548	LOC106047899	regulator of chromosome condensation-like	27.34	17.87	21.13	4.06	4.57	8.08	13.8	23.47	25.31
gene1858	PCNXL2	pecanex-like 2 (Drosophila), transcript variant X1	4.29	3.32	2.5	0.92	1.6	1.1	1.05	1.07	4.95
gene18591	LOC106047977	-	349.93	0.18	522.25	2.02	0.21	5.46	164.25	359.92	165.99
gene18594	LOC106048010	-	1129.46	0.24	1355.1	2.33	0.59	21.43	908.04	499.68	387.14
gene18595	LOC106048012	keratin, type I cytoskeletal 15-like	388.07	0.05	579.36	2.17	0.42	7.87	497.91	166.08	242.34
gene18599	LOC106048011	keratin, type I cytoskeletal 14-like	27.37	0.09	138.79	0.25	0.46	0.77	90.21	419.5	51.73
gene18600	LOC106047979	keratin, type I cytoskeletal 14-like	47.79	0.7	233.86	0.81	1.35	1.92	164.73	663.55	72.56
gene18619	LOC106047988	uncharacterized LOC106047988	32.39	10.13	57.71	6.83	11.04	7.84	43.75	71.23	12.45
gene18629	LOC106047992	serine/threonine-protein kinase 17A-like	57.52	67.23	34.15	6.1	10.9	16.85	7.91	24.14	49.01
gene18638	VPS25	vacuolar protein sorting 25 homolog (S. cerevisiae)	64.55	62.03	76.71	29.09	32.8	34.25	77.73	82.44	49.36
gene18649	PRCP	prolylcarboxypeptidase (angiotensinase C)	97.57	73.22	64.42	42.73	25.7	28.99	77.06	45.73	119.95
gene18685	AICDA	activation-induced cytidine deaminase	7.39	9.01	10.02	0	0	0.1	0.78	0.28	10.19
gene18694	KLRG1	killer cell lectin-like receptor subfamily G, member 1, transcript variant X1	14.24	11.53	12.89	2.43	0.99	0.52	3.36	6.6	17.19
gene18723	LOC106048111	histone H2A.Z	154.58	138.49	177.16	48.73	44.9	77.78	152.43	167.33	131.93
gene18727	DAPP1	dual adaptor of phosphotyrosine and 3-phosphoinositides, transcript variant X1	29.04	31.64	33.54	2.54	3.71	4.7	14.56	16.84	38.66
gene18731	PRMT8	protein arginine methyltransferase 8, transcript variant X1	0.69	1.58	0.18	0	0.05	0.03	0.17	0.14	1.1
gene18732	CRACR2A	calcium release activated channel regulator 2A, transcript variant X6	4.81	2.7	4.49	1.91	1.17	2.38	2.93	1.78	5.34
gene18740	FOXM1	forkhead box M1	4.55	4.14	5.16	0.34	0.4	0.48	3.16	2.71	5.42
gene18748	LOC106048163	src substrate cortactin-like, transcript variant X1	79.87	74.71	43.76	16.42	14.47	18.05	37.55	28.53	81.59
gene18749	LOC106048164	olfactory receptor 1020-like	1.26	1.57	0.94	0.08	0.08	0.31	0.82	0.36	2.21
gene18766	CDS1	CDP-diacylglycerol synthase (phosphatidate cytidylyltransferase) 1, transcript variant X1	6.92	0.04	8.45	0.07	0.05	0.16	6.46	7.22	3.38
gene18775	LOC106048184	chromosome unknown open reading frame, human C4orf33, transcript variant X1	7.97	4.78	6.06	2.67	2.63	2.48	5.03	3.93	4.2
gene18786	HMHA1	histocompatibility (minor) HA-1	49.64	40.38	23.78	8.99	10.79	13.07	24.38	32.09	77.04
gene18816	LOC106048210	tyrosine-protein kinase JAK3-like	100.08	70.62	41.95	15.21	8.49	15.32	26.85	38	109.3
gene18818	FANCB	Fanconi anemia, complementation group B	1.97	0.81	2.35	0.03	0.06	0.12	0.95	2.23	2.84
gene1883	EDARADD	EDAR-associated death domain	7.72	5.08	4.7	0.41	0.43	2	3.47	4.11	10.61
gene18839	NUP160	nucleoporin 160kDa	22.59	16.81	21.73	8.46	9.49	9.73	15.98	23.88	24
gene18876	CD5	CD5 molecule	29.4	28.98	23.09	10.64	12.34	10.7	22.19	23.49	33.55
gene18878	ZP1	zona pellucida glycoprotein 1 (sperm receptor)	13.59	4.24	19.25	0.49	1.09	2.36	15.43	13.32	25.07
gene18900	ABI3	ABI family, member 3	20.71	14.27	13.02	1.83	1.56	4.07	2.67	4.18	22
gene18922	SKAP1	src kinase associated phosphoprotein 1	26.89	34.87	19.15	9.24	5.45	10.23	8.13	9.76	30.83
gene18953	LOC106048382	interferon-induced very large GTPase 1-like	8.48	7.68	5.88	1.03	1.76	1.29	6.81	9.26	9.92
gene18954	LOC106048394	uncharacterized LOC106048394	1.48	0.13	1.77	0	0.08	0	0.74	3.06	0.5
gene18968	ZAP70	zeta-chain (TCR) associated protein kinase 70kDa, transcript variant X3	35.85	25.01	16.57	1.79	1.62	4.51	10.94	20.29	37.07
gene18970	MYO1F	myosin IF, transcript variant X1	95.88	71.65	52.39	9.88	17.17	19.87	46.81	56.87	114.2
gene18974	ACER1	alkaline ceramidase 1	3.48	0	3.45	0.05	0.07	0.18	0.95	1.38	1.61
gene190	LOC106029878	2-hydroxyacylsphingosine 1-beta-galactosyltransferase-like, transcript variant X1	15.19	1.79	16.98	5.92	3.59	1.92	14.25	12.95	6.42
gene19016	ETV7	ets variant 7, transcript variant X2	10.92	3.46	11.8	2.28	3.2	3.23	8.55	13.03	4.72
gene19019	SRSF3	serine/arginine-rich splicing factor 3	275.55	237.2	260.21	122.64	100.96	114.08	198.78	246.04	176.27
gene19021	RAB44	RAB44, member RAS oncogene family, transcript variant X1	9.96	9.01	5.64	0.75	0.73	1.96	4.25	6.43	14.27
gene19025	FGD2	FYVE, RhoGEF and PH domain containing 2, transcript variant X1	10.66	6.99	8.22	2.49	4.66	4.15	5.58	3.62	10.69
gene19078	LOC106048496	glucosylceramidase-like	16.71	0	17.99	0.14	0	0.19	9.7	13.08	6.58
gene19082	TRIM46	tripartite motif containing 46	9.19	6.65	11.99	3.45	5.85	5.16	14.26	11.73	9.27
gene19114	ART5	ADP-ribosyltransferase 5, transcript variant X3	18.29	11.36	14.32	3.17	6.19	4.9	11.47	9.27	14.49
gene19119	RHOG	ras homolog family member G	45.45	54.46	44.85	15.31	24.1	18.2	32.52	58.67	84.85
gene1912	EXO1	exonuclease 1	1.52	1.68	1.04	0.27	0.24	0.19	0.62	0.72	1.99
gene19150	TTK	TTK protein kinase	6.85	7.35	7.04	1.11	0.8	0.86	4.85	3.32	9.36
gene19151	ELOVL4	ELOVL fatty acid elongase 4, transcript variant X2	14.73	0.45	15.8	0.3	0.1	1.84	12.85	10.34	7.84
gene19152	SH3BGRL2	SH3 domain binding glutamate-rich protein like 2, transcript variant X1	4.04	1.76	3.02	1.17	1.22	1.9	3.16	4.08	3.62
gene19162	LOC106048595	C-C motif chemokine 19-like	81.43	53.55	79.99	0.7	2.34	2.39	54.12	73.98	41.81
gene19163	LOC106048600	C-C motif chemokine 26-like	2632.65	2106.7	1327.93	73.2	41.75	57.72	795.72	1425.17	2329.91
gene19175	LOC106048615	regulatory solute carrier protein family 1 member 1-like	25.2	25.13	18.74	11.51	7.81	19.1	21.35	28.54	28.97
gene19197	ELL3	elongation factor RNA polymerase II-like 3, transcript variant X1	4.02	1.91	4.34	0.42	1.74	1.32	2.72	1.85	2.23
gene192	PIK3AP1	phosphoinositide-3-kinase adaptor protein 1, transcript variant X1	46.24	37.33	37.84	10.88	8.66	14.08	19.02	22.96	58.05
gene19204	PRC1	protein regulator of cytokinesis 1	10.29	12.72	14.21	2.05	2.24	1.83	19.29	13.53	18.28
gene19210	ZNF710	zinc finger protein 710	33.27	24.17	22.22	7.1	8.8	8.88	15.9	20.86	39.77
gene19217	RASGRF1	Ras protein-specific guanine nucleotide-releasing factor 1, transcript variant X1	2.9	2.38	3.5	0.45	0.57	0.37	1.45	1.75	3.72
gene1922	ZBTB18	zinc finger and BTB domain containing 18, transcript variant X1	24.78	24.99	22.48	10.74	10.7	15.61	24.99	20.88	32.47
gene19220	WDR76	WD repeat domain 76	24.09	19.09	19.96	6.47	8.5	10.46	10.31	12.75	21.67
gene19234	LOC106048691	keratin, type II cytoskeletal 4-like, transcript variant X1	970.72	0.05	1220.34	3.93	0.32	18.68	908.38	735.71	363.3
gene19235	LOC106048694	keratin, type II cytoskeletal 3-like	75.98	0.03	159.22	0.36	0	7.43	120.88	66.67	71.42
gene19238	LOC106048695	uncharacterized LOC106048695	1.09	0.12	0.39	0	0.09	0	1.46	0.47	0.42
gene19240	LOC106048701	keratin, type II cytoskeletal 5-like	0.22	0.04	0.09	0	0.02	0	0.12	0.14	0.12
gene19242	LOC106048696	keratin, type II cytoskeletal 6C-like	258.29	0.16	406.8	0.94	0.28	4.29	258.87	528.76	128.29
gene19258	SLC4A8	solute carrier family 4, sodium bicarbonate cotransporter, member 8, transcript variant X1	0.64	0.21	0.5	0.11	0.18	0.12	0.34	0.5	0.46
gene19259	LOC106048707	uncharacterized LOC106048707, transcript variant X1	9.07	6.5	4.82	0.6	1.04	0.44	2.45	2.26	10.49
gene19260	GALNT6	polypeptide N-acetylgalactosaminyltransferase 6	13.3	11.8	11.37	0.67	1.35	0.75	2.33	3.53	15.9
gene19262	BIN2	bridging integrator 2	29.15	29.74	20.32	5.2	5.38	6.7	11.11	12.39	45.09
gene19270	LOC106048724	T-cell receptor beta-1 chain C region-like	34.47	48.12	27.6	1.14	1.96	1.01	13.07	9.12	46.92
gene19271	LOC106048725	T-cell receptor beta-2 chain C region-like	156.07	142.91	99.3	11.39	19.25	28.27	62.84	36.16	205.09
gene19273	LOC106048722	transient receptor potential cation channel subfamily V member 6-like	2.44	0	2.64	0	0	0.04	2.22	1.6	2.15
gene19291	FAM83H	family with sequence similarity 83, member H	5.31	0.63	5.87	1.01	1.36	0.92	5.17	9.36	2.06
gene19297	LOC106048737	epiplakin-like	12.9	0	32.01	0	0.15	0.78	15.16	8.25	11.28
gene19315	TRAIP	TRAF interacting protein	17.12	15.88	15.03	6	6.6	5.1	12.39	13.13	14.77
gene19358	URB2	URB2 ribosome biogenesis 2 homolog (S. cerevisiae)	10.61	6.63	7.91	3.82	3.6	5.07	5.8	10.44	11.06
gene19365	CCSAP	centriole, cilia and spindle-associated protein	14.09	6.2	6.74	0.72	1.81	1.9	12.5	18.17	8.02
gene19367	LOC106048825	iroquois-class homeodomain protein IRX-4-like	10.89	0	11.58	0.11	0	0.2	3.77	4.23	2.59
gene19371	MELK	maternal embryonic leucine zipper kinase, transcript variant X1	9.93	8.91	7.96	1.31	0.63	0.88	4.47	5.22	9.88
gene19394	LRRC4	leucine rich repeat containing 4	2.39	2.59	1.91	0.32	0.49	0.49	1.8	2.68	3.24
gene19395	LOC106048863	uncharacterized LOC106048863	0.6	0.63	0.54	0.06	0.06	0.06	0.6	2.08	0.74
gene19408	PAX5	paired box 5	18.14	22.47	26.84	0.12	0.1	0.36	1.4	0.86	31.4
gene19418	HOXC13	homeobox C13	8.05	0	12.02	0.32	0	0.55	6.07	15.38	2.31
gene19431	LOC106048914	serine/threonine-protein kinase 10-like	33.78	26.13	23.01	3.15	7.95	7.67	6.63	8.27	39.87
gene19433	LOC106048913	collagen alpha-1(I) chain-like, transcript variant X2	20.92	17.48	12.5	1.61	3.14	3.88	4.99	5.53	26.79
gene19445	NPC1L1	NPC1-like 1	1.17	1.35	1.53	0.32	0.46	0.43	1.65	1.52	2.01
gene19449	MAT2A	methionine adenosyltransferase II, alpha	30.1	21.29	26.42	4.18	5.45	16.42	25.56	51.86	29.87
gene19459	IRF5	interferon regulatory factor 5	8.63	6.63	7.92	2.03	2.87	2.82	7.55	6.7	10.42
gene19480	METAP1	methionyl aminopeptidase 1	24.83	18.51	19.55	8.17	7.61	10.55	15.22	18.42	22.78
gene19492	SEMA4A	sema domain, immunoglobulin domain (Ig), transmembrane domain (TM) and short cytoplasmic domain, (semaphorin) 4A	18.57	16.47	14.64	0	2.82	5.75	6.67	2.48	25.28
gene19498	LOC106048962	ras GTPase-activating-like protein IQGAP3	2.82	2.56	3	0.32	0.33	0.19	2.76	2.47	3.37
gene19506	LOC106048968	dnaJ homolog subfamily A member 1-like	14.63	12.28	14.4	1.32	5.83	3.66	18.81	17.09	20.4
gene19507	LOC106048978	serpin B11-like	11.45	0.82	13.53	0.6	0.74	1.99	9.33	8.08	3.71
gene19546	NEMP1	nuclear envelope integral membrane protein 1	14.77	15.15	12.6	4.84	8.88	7.05	13.91	18.48	18.59
gene19563	SLC6A9	solute carrier family 6 (neurotransmitter transporter, glycine), member 9	7.76	6.64	6.08	3.87	1.92	2.97	4.35	13.79	7.83
gene19589	PLEKHO1	pleckstrin homology domain containing, family O member 1	24.48	18.59	22.63	7.06	11.52	10.29	22.24	39.61	22.92
gene19609	LOC106049106	uncharacterized LOC106049106	330.15	565.81	519.86	186.99	194.66	144.16	506.32	442.26	222.8
gene19619	CDC34	cell division cycle 34	33.63	20.08	30.45	7.99	9.61	13.28	18.98	17.87	20.35
gene19621	MADCAM1	mucosal vascular addressin cell adhesion molecule 1	2.53	1.99	1.21	0.12	0.34	0.23	0.86	1.29	3.35
gene19625	MIER2	mesoderm induction early response 1, family member 2, transcript variant X1	29.36	22.65	27.76	7.69	10.54	14.42	22.14	20.88	26.58
gene19634	LOC106049115	protein S100-A14-like, transcript variant X1	146.54	8.08	194.04	3.31	5.47	7.86	120.58	157.58	64.83
gene19635	S100A16	S100 calcium binding protein A16	116.63	22.08	152.17	14.71	10.01	27.48	108.97	185.5	53.35
gene19639	LOC106049125	protein S100-A12-like	8.96	2.8	15.95	0.53	0.51	3.81	10.54	22.31	5.68
gene19640	LOC106049127	protein S100-A8-like, transcript variant X2	6.77	0.27	9.85	0	0	0.32	8.66	33.66	0
gene19642	LOC106049120	keratin-associated protein 5-10-like	8.99	0	33.93	0	0	0.27	5.9	2.62	3.54
gene19644	LOR	loricrin	233.81	0.11	1054.13	1.29	0.06	14.21	209.19	85.46	122.93
gene19648	MVP	major vault protein, transcript variant X1	3.47	6.55	6.06	0.41	0.18	0.36	0.94	1.41	5.16
gene19671	WNT4	wingless-type MMTV integration site family, member 4	23.14	1.56	22.18	6.6	2.28	1.15	20.11	37.86	10.01
gene19677	CNTNAP4	contactin associated protein-like 4, transcript variant X1	6.19	5.49	7.77	0.76	1.34	2.75	8.95	2.31	9.17
gene19681	SPAG5	sperm associated antigen 5	22.08	19.57	18.73	1.99	2.54	1.06	11.66	16.05	22.46
gene1969	EIF2AK2	eukaryotic translation initiation factor 2-alpha kinase 2, transcript variant X1	49.2	19.18	99.32	21.87	25.25	24.79	67.62	96.27	18.13
gene197	LOC106034197	cytochrome P450 2C19-like, transcript variant X1	1.04	0.18	2.62	0.07	0.07	0.21	2.31	0.39	0.75
gene19720	LOC106049205	natural killer cell receptor 2B4-like	9.49	6.71	2.33	1.17	1.79	2.28	2.94	4.56	4.74
gene19721	LOC106049230	SLAM family member 8-like	81.28	76.4	59.98	19.84	19.37	15.64	60.66	52.47	95.9
gene19722	LOC106049209	signaling lymphocytic activation molecule-like	9.81	6.24	4.82	1.03	0.31	1.1	1.07	0.97	7.37
gene19723	LOC106049228	SLAM family member 5-like, transcript variant X1	29.87	29.12	17.25	4.14	5.36	6.41	10.56	7.95	36.78
gene19734	LOC106049216	uncharacterized protein DDB_G0274171-like	4.03	0	17.17	0.22	0	0.47	12.33	2.83	7.88
gene19736	LOC106049223	scale keratin-like	176.96	0	526.11	0.23	0.25	2.63	166.05	71.38	139.58
gene19763	GINS2	GINS complex subunit 2 (Psf2 homolog)	41.21	29.97	35.66	8.06	7.24	10.18	14.51	21.51	41.01
gene19767	IRF8	interferon regulatory factor 8	155.73	114.77	135.89	21.6	24.11	31.2	77.1	208.65	225.21
gene19772	LOC106049262	selenium-binding protein 1-like	2.12	0.03	2.91	0	0.04	0.04	2.91	1.38	1.39
gene19844	LOC106049328	alveolar macrophage chemotactic factor-like	13.29	9.41	4.43	0	0	0.25	1.66	1.11	55.11
gene19845	LOC106049327	growth-regulated alpha protein-like	117.21	146.89	163.76	0.17	0	0.15	2.05	4.47	133.74
gene19882	SLC52A3	solute carrier family 52 (riboflavin transporter), member 3	4.04	2.06	2.69	0.47	1.06	1.2	1.47	4.21	2.99
gene19887	SDCBP2	syndecan binding protein (syntenin) 2	2.68	0	11.9	0.19	0	0	2.84	4.19	3.68
gene19904	ABCC5	ATP-binding cassette, sub-family C (CFTR/MRP), member 5, transcript variant X1	50.32	27.9	32.21	13.13	16.9	15.1	33.25	33.05	51.17
gene1991	LRRC73	leucine rich repeat containing 73	3.45	3.01	4.17	0.83	1.35	1.11	4.71	4.26	4.42
gene19925	TRAF4	TNF receptor-associated factor 4	5.63	5.41	4.97	0.71	2.05	2.59	1.89	4.54	4.8
gene19926	FAM222B	family with sequence similarity 222, member B, transcript variant X4	13.82	10.97	12.87	5.92	5.4	8.16	10.33	13.62	17.22
gene19927	LOC106049419	uncharacterized LOC106049419	4.61	7.87	6.94	0.11	0.55	0.27	0.58	1.53	4.68
gene19933	LOC106049423	kallikrein-14-like	37.04	0	83.18	0	0	0.85	40.65	32.36	23.32
gene19934	LOC106049424	putative serine protease 41	82.09	0	163.82	0.37	0.07	1.21	90.24	102.71	57.69
gene19935	LOC106049425	kallikrein-8-like	29.32	0.17	57.68	0	0	0.55	25.76	40.08	10.83
gene19940	LOC106049429	sushi, nidogen and EGF-like domain-containing protein 1	698.65	263.85	260.92	153.02	158.88	176.96	194.71	232.75	1185.93
gene19948	RASAL3	RAS protein activator like 3, transcript variant X1	15.84	14.75	9.84	2.14	2.22	2.34	4.9	5.77	19.93
gene19950	LOC106049439	leukotriene-B(4) omega-hydroxylase 2	6.94	7.46	7.05	1.53	3.74	2.72	6	6.62	8.29
gene19959	LOC106049445	proto-oncogene vav-like	60.55	41.97	45.76	11.68	25.16	16.92	28.69	37.68	93.23
gene1996	POLH	polymerase (DNA directed), eta	9.57	10.62	8.84	3.89	3.07	4.65	6.42	9.62	9.52
gene19962	LOC106049451	CD209 antigen-like protein C	19.96	20.14	15.53	0.62	0.59	2.36	2.13	1.21	32.43
gene19988	GMIP	GEM interacting protein	27.27	25.05	18.07	2.4	2.58	6.81	15.77	18.3	44.23
gene19992	LOC106049484	uncharacterized LOC106049484	9.05	10.26	7.61	1.04	2.88	2.96	13.24	11.23	16.03
gene20002	TNIP3	TNFAIP3 interacting protein 3, transcript variant X1	3.11	4.04	1.78	0.3	0.28	0.48	1.15	1.43	2.67
gene20003	NDNF	neuron-derived neurotrophic factor, transcript variant X1	19.13	0.51	11.61	2.02	1.08	1.3	5.16	7.18	3.97
gene20006	LOC106049502	cadherin-related family member 2-like	0.47	0.46	1.1	0.15	0.19	0.17	0.29	0.52	0.76
gene20011	LOC106049507	hexokinase-3-like	0.55	0.64	0.55	0.06	0.11	0.11	0.8	0.8	0.75
gene20013	ZNF346	zinc finger protein 346	20.15	12.97	15.5	7.93	7.95	10.81	15.93	23.08	17.81
gene20018	LOC106049512	protein FAM193B-like	16.25	13.11	14.01	4.03	7.88	9.15	18.66	17.8	16.38
gene20022	PBK	PDZ binding kinase	14.31	14.42	16.63	5.15	3.02	3.06	20.33	16.87	12.33
gene20024	LOC106049525	nuclear GTPase SLIP-GC-like	28.91	13.02	36.43	5.66	8.45	6.97	36.82	37.62	15.17
gene20025	LOC106049527	nuclear GTPase SLIP-GC-like, transcript variant X1	21.55	19	29.09	8.1	10.55	8.98	25.71	38.28	14.2
gene20028	CHRNA2	cholinergic receptor, nicotinic, alpha 2 (neuronal), transcript variant X1	0.92	1.04	1	0.04	0.15	0.12	1.51	2.33	2.86
gene20029	PTK2B	protein tyrosine kinase 2 beta	44	29.79	29.78	3.25	6.95	7.86	17.12	25.91	39.2
gene20032	LOC106049528	uncharacterized LOC106049528	638.77	366.85	695.75	178.64	166.6	206.32	622.85	596.85	337.29
gene20033	FAAH2	fatty acid amide hydrolase 2	17.01	6.41	15	4.03	5.32	5.08	8.44	16.32	8.83
gene20037	CCNB3	cyclin B3	27.26	25.36	23.57	3.71	4.04	3.37	11.23	11.56	25.27
gene2005	MRPL14	mitochondrial ribosomal protein L14	41.82	29.78	41.65	15.36	15.04	13.12	38.06	39.61	23.71
gene20058	S1PR4	sphingosine-1-phosphate receptor 4	11.03	13.61	6.39	1.06	1.28	2.7	4.46	6.95	27.76
gene20066	LOC106049570	keratin, type I cytoskeletal 15-like	679.45	0	757.23	1.25	0.08	5.38	391.18	551.05	142.76
gene20067	KRT23	keratin 23, type I	10.73	5.5	7.97	2.16	3.2	0.9	8.61	12.07	10.98
gene20069	LOC106049573	keratin, type I cytoskeletal 12-like	0.68	0.22	0.31	0	0.06	0	0.41	0.41	0.55
gene20074	CCR7	chemokine (C-C motif) receptor 7	56.35	48.83	26.76	1.93	1.53	1.98	36.98	61.57	166.17
gene20078	TOP2A	topoisomerase (DNA) II alpha 170kDa	25.98	27.54	24.51	3.63	2.44	1.95	13.72	14.58	34.77
gene20085	SENP1	SUMO1/sentrin specific peptidase 1	17.06	15.36	11.88	5.02	6.3	9.59	16.92	15.57	17.74
gene20087	ARHGAP9	Rho GTPase activating protein 9	29.02	27.86	18.81	5.84	7.92	7.99	17.42	17.62	39.36
gene20089	DDIT3	DNA-damage-inducible transcript 3	29.98	27.7	24.21	10.64	9.36	13.16	41.76	35.39	34.4
gene20113	LOC106049613	phospholipid-transporting ATPase IB-like	0.67	0.66	0.5	0	0.13	0.09	0.37	0.23	2.12
gene20117	LOC106049619	very long-chain acyl-CoA synthetase-like	9.14	0.08	4.5	0.59	1.18	0.23	2.38	4.54	1.98
gene2012	NFKBIE	nuclear factor of kappa light polypeptide gene enhancer in B-cells inhibitor, epsilon, transcript variant X1	51.3	60.89	49.03	19.6	24.87	13.67	73.87	59.73	97.17
gene2015	AARS2	alanyl-tRNA synthetase 2, mitochondrial, transcript variant X1	19.35	14.28	15.83	4.41	6.73	7.84	10.9	12.53	16.53
gene20180	IKZF3	IKAROS family zinc finger 3 (Aiolos), transcript variant X1	42.18	40.74	32.84	2.58	2.66	3.07	4.59	4.57	40.39
gene20224	PPIH	peptidylprolyl isomerase H (cyclophilin H), transcript variant X1	87.22	87.49	90.54	32.89	31.71	46.63	90.19	100.15	64.35
gene20227	PPCS	phosphopantothenoylcysteine synthetase	51.06	36.28	51.29	18.12	17.37	22.37	35.69	35.92	32.82
gene20239	LOC106049749	E3 ubiquitin-protein ligase TRIM41-like, transcript variant X1	7.28	5.95	7.65	0.08	0.5	0.34	0.94	0.7	6.61
gene20240	LOC106049759	tripartite motif-containing protein 7-like	7.53	5.2	3.84	0.57	0.44	1.1	1.19	1.14	6.09
gene20280	LOC106049788	feather keratin Cos1-1/Cos1-3/Cos2-1-like	1.67	1.65	2.05	0.1	0.39	0.38	0.52	1.05	1.69
gene2032	KCNK17	potassium channel, two pore domain subfamily K, member 17	11.82	7.32	8.51	0.83	1.38	2.44	3.7	3.03	9.94
gene20322	CGN	cingulin	0.67	0.3	1.11	0.4	0.07	0.07	0.86	1.54	0.6
gene20338	LOC106049849	complement C4-A-like	2.68	4.83	3.02	0.79	1.45	1.21	4.55	2.39	4.31
gene20367	LOC106049881	glycine-rich cell wall structural protein 1.8-like	46.75	1.25	154.7	1.93	0.8	7.25	104.08	38.41	58.17
gene20369	INCENP	inner centromere protein antigens 135/155kDa	20.25	19.19	14.41	6	6.55	5.19	8.43	11.04	22.75
gene20401	LOC106049915	Ig mu heavy chain disease protein-like	1822.94	2927.13	958.51	157.58	185.25	113.74	277.08	328.33	11973.4
gene20405	LOC106049922	HLA class II histocompatibility antigen, DR alpha chain	2803.33	2321.62	1590.26	932.38	931.33	679.32	2125.69	1560.28	4327.81
gene20406	LOC106049923	uncharacterized LOC106049923	290.98	872.65	491.64	306.7	187.67	28.74	838.48	468.16	836.23
gene20407	LOC106049920	uncharacterized LOC106049920	412.55	319.19	222.59	103.15	126.58	97.44	274.22	215.65	621.4
gene20438	VCPKMT	valosin containing protein lysine (K) methyltransferase	56.47	45.63	51.74	15.02	18.93	23.78	53.87	55.67	60.16
gene20461	ADRBK1	adrenergic, beta, receptor kinase 1	56.01	58.72	56.38	17.28	25.91	31.74	42.16	60.31	71.29
gene20481	LOC106029344	C-type lectin domain family 2 member D-like	85.55	62.08	74.98	17.75	22.76	25.32	80.9	111.5	110.22
gene20518	LOC106029373	protein-glutamine gamma-glutamyltransferase K-like	8.06	1.97	11.09	1.22	1.16	0.34	7.61	17.13	7.34
gene20542	PRF1	perforin 1 (pore forming protein)	6	3.87	2.74	1.69	2.22	2.35	4.06	3.58	7.74
gene20543	LOC106029399	uncharacterized LOC106029399	50.86	26.43	35.01	5.86	28.87	21.48	27.49	37.01	62.64
gene20584	LOC106029442	chromosome unknown open reading frame, human C7orf43	5.34	4.1	4.31	1.64	2.03	2.25	3.51	9.41	5.64
gene20593	LOC106029451	antigen-presenting glycoprotein CD1d-like	8.86	7.21	6.68	3.07	4.06	2.69	3.15	0.74	17.91
gene20596	LOC106029453	IgGFc-binding protein-like	176.69	126.87	44.99	11.41	11.37	35.68	49.39	23.61	381.24
gene20618	CENPL	centromere protein L	4.34	3.68	2.68	1.31	1.05	1.32	2.22	3.64	3.71
gene20624	LOC106029484	amiloride-sensitive sodium channel subunit alpha-like	1.46	0.06	0.84	0	0.22	0.04	0.32	2.36	0.37
gene20628	LOC106029489	free fatty acid receptor 3-like	3.87	1.89	1.93	0.4	0.96	1.35	1.56	4.64	4.93
gene20630	LOC106029492	B-cell receptor CD22-like	32.06	28.29	27.26	1.11	1.01	2.85	7.35	3.37	52.69
gene20631	LOC106029493	B-cell receptor CD22-like	11.39	11.2	9.88	0.34	0.65	1.29	1.4	1.15	20.04
gene20638	LOC106029497	uncharacterized LOC106029497, transcript variant X1	80.98	43.05	47.31	1.95	3.11	4.69	15.9	7.36	60.15
gene20639	LOC106029500	uncharacterized LOC106029500, transcript variant X1	47.43	0	100.11	1.53	0	1.38	94.24	24.29	95.01
gene20641	LOC106029502	antigen peptide transporter 1-like	42.37	17.02	31.15	11.62	15.47	12.18	27.14	32.41	33.42
gene20642	TAP2	transporter 2, ATP-binding cassette, sub-family B (MDR/TAP)	59.41	34.02	67.46	30.07	27.51	24.76	68.05	86.16	50.22
gene20644	LOC106029505	uncharacterized LOC106029505	7195.96	3465.24	5769.61	3913.59	2080.16	2088.66	5539.39	5714.57	7865.96
gene20652	LOC106029514	nck-associated protein 1-like	5.62	5.69	3.25	1.84	2.65	2.39	4.16	3.52	10.7
gene20657	LOC106029519	uncharacterized LOC106029519, transcript variant X1	209.76	142.54	183.65	72.22	133.96	55.15	187.48	179.96	226.37
gene2066	LOC106029788	uncharacterized LOC106029788	1.38	1.2	1.65	0.29	0.69	0.38	1.16	0.98	1.25
gene20718	LOC106029585	uncharacterized LOC106029585	18.76	10.42	54.97	7.73	11.4	19.47	58.82	16.91	33.23
gene20727	LOC106029595	basic salivary proline-rich protein 2-like	2.89	5.19	4.33	0.23	1.37	0.54	1.52	2.61	5.64
gene20733	LOC106029601	butyrophilin subfamily 1 member A1-like	85.41	119.53	103.22	20.72	35.2	82.4	90.19	46.83	79.85
gene20751	LOC106029620	acrosin-like	4.48	3.17	4.45	0.79	1.39	2.13	3.47	3.93	4.65
gene20754	LOC106029623	E3 ubiquitin-protein ligase TRIM39-like	18.35	13.94	16.67	0.42	1.69	0.76	0.99	1.81	12.77
gene20819	LOC106029690	interferon-induced very large GTPase 1-like	14.96	14.39	15.57	1.46	2.39	2.26	18.24	15.56	18.26
gene20821	LOC106029692	heparan sulfate glucosamine 3-O-sulfotransferase 3B1	14.06	2.28	7.18	0.78	0.99	0.69	5.79	6.87	4.87
gene20840	LOC106029714	class II histocompatibility antigen, B-L beta chain-like	1874.84	1388.28	976.42	521.27	623.91	463.58	1571.63	875.59	2606.31
gene2096	EAF2	ELL associated factor 2	76.21	56.62	69.45	6.31	12.8	20.39	66.04	56.45	95.1
gene2121	LOC106029913	uncharacterized LOC106029913	6.12	3.78	5.25	1.37	0.48	2.63	6.1	4.35	3.34
gene2177	GALNT3	polypeptide N-acetylgalactosaminyltransferase 3, transcript variant X1	1.68	0.04	1.41	0.1	0.19	0.24	1.16	0.94	0.97
gene218	LOC106030157	lysosomal acid lipase/cholesteryl ester hydrolase-like, transcript variant X1	3.55	0.28	2.93	0.17	0.04	0.29	2.37	1.04	1.63
gene2185	STK39	serine threonine kinase 39, transcript variant X1	7.28	8.22	7.62	2.52	3.56	2.47	5.03	4.87	9.42
gene2190	SPC25	SPC25, NDC80 kinetochore complex component	23.72	25.17	31.76	9.72	5.6	5.65	28.1	21.47	24.86
gene2200	KLHL41	kelch-like family member 41	1.79	0.76	0.71	0.06	0.41	0.37	1.13	0.64	1.76
gene2203	LOC106029975	uncharacterized LOC106029975	23.78	23.98	19.96	1.72	5.26	11.68	18.6	45.32	17.48
gene2232	CDCA7	cell division cycle associated 7, transcript variant X1	16.12	19.02	15.84	1.34	0.96	0.88	6.26	5.39	16.64
gene2241	LOC106030007	uncharacterized LOC106030007, transcript variant X1	2.42	1.3	1.31	0.54	0.97	0.85	1.39	2.08	1.93
gene2265	HOXD10	homeobox D10	6.38	8.98	10.22	3.02	4.22	3.37	10.49	6.71	11.17
gene2283	DFNB59	deafness, autosomal recessive 59	1.49	0.8	1.14	0	0	0.3	0.87	2.95	1.6
gene2287	CCDC141	coiled-coil domain containing 141, transcript variant X3	0.73	0.07	0.22	0.04	0.04	0.06	0.19	0.96	0.1
gene2295	LOC106030047	uncharacterized LOC106030047, transcript variant X2	1.38	2.23	0.43	0.06	0.07	0.54	0.38	0.29	1.07
gene2296	ITGA4	integrin, alpha 4 (antigen CD49D, alpha 4 subunit of VLA-4 receptor)	21.47	24.04	8.91	3.86	6.47	14.16	13.38	17.37	31.86
gene2313	CD28	CD28 molecule	9.34	9	5.17	0.39	0.33	0.75	2.8	2.6	12.06
gene2314	CTLA4	cytotoxic T-lymphocyte-associated protein 4	6.15	3.56	3.97	0.07	0.45	0.48	2.68	4.03	11.33
gene2315	LOC106030066	inducible T-cell costimulator-like	16.31	12.89	8.25	1.3	1.56	2.94	4.08	5.21	19.44
gene2370	ITGB2	integrin, beta 2 (complement component 3 receptor 3 and 4 subunit), transcript variant X1	74.17	62.23	40.73	18.08	20.39	19.38	55.78	61.58	120.64
gene2415	GPNMB	glycoprotein (transmembrane) nmb	58.76	0.25	66.14	0.67	5.51	0.77	36.53	45.26	32.43
gene2417	IGF2BP3	insulin-like growth factor 2 mRNA binding protein 3	4.02	2.34	4.06	1.13	1.64	0.95	3.42	3.43	3.37
gene2442	SNX10	sorting nexin 10, transcript variant X1	21.01	12.25	14.7	5.05	6.93	9.57	10.78	13.85	15.94
gene2447	HOXA2	homeobox A2	1.03	1.22	0.8	0.12	0.11	0.32	0.57	0.39	2.6
gene2449	HOXA4	homeobox A4	1.12	1.14	1.64	0.32	0.24	0.24	1.83	0.39	0.46
gene2480	DPH3	diphthamide biosynthesis 3	6.34	4.31	5.46	2.55	2.39	3.2	6.49	8.29	4.21
gene2488	SATB1	SATB homeobox 1, transcript variant X5	18.67	16.6	11.19	4.59	5.61	5.51	5.49	5.3	16.74
gene2496	SGOL1	shugoshin-like 1 (S. pombe)	4.61	5.58	5.43	0.36	0.09	0.34	3.09	2.27	8.32
gene2532	EOMES	eomesodermin	4.76	4.29	1.64	0.08	0.49	1.04	1.31	4.03	3.01
gene2596	MB21D1	Mab-21 domain containing 1	5.37	4.9	6.11	1.32	2.26	2.42	7.59	9.72	5.78
gene2598	KCNQ5	potassium channel, voltage gated KQT-like subfamily Q, member 5, transcript variant X3	6.49	5.31	3.27	0.82	0.87	1.68	2.46	4.59	7.11
gene2657	LRRC1	leucine rich repeat containing 1	16.75	7.41	19.96	5.6	7.09	5.48	18.03	18.68	16.4
gene268	NPFFR1	neuropeptide FF receptor 1	0.53	0.81	1.36	0.08	0.16	0	1.18	1.28	1.12
gene2699	SH3YL1	SH3 and SYLF domain containing 1	8.46	1.28	8.06	1.66	2.07	2.38	5.72	5.44	4.14
gene2720	CCNE2	cyclin E2, transcript variant X1	6.07	5.02	5.24	0.61	2.13	2.67	5.59	3.1	7.65
gene2726	ESRP1	epithelial splicing regulatory protein 1, transcript variant X1	4.98	0.27	5.33	0.65	1.13	0.53	4.46	7.76	2.97
gene2739	RBM12B	RNA binding motif protein 12B	44.76	27.96	32.78	7.08	13.08	14.02	35.82	39.21	46.87
gene2761	OSGIN2	oxidative stress induced growth inhibitor family member 2	13.23	12.91	8.62	3.29	4.21	8.12	5.63	9.96	14
gene2766	LOC106030540	uncharacterized LOC106030540	0.72	1.09	1.52	0.28	0.3	0.03	0.86	0.77	1.07
gene2804	FABP5	fatty acid binding protein 5 (psoriasis-associated)	245.88	20.38	420.8	43.56	34.02	63.03	197.25	102	95.17
gene2836	LY96	lymphocyte antigen 96, transcript variant X1	42.12	30.83	48.78	6.02	8.41	8.43	32.89	21.52	51.25
gene286	CDH23	cadherin-related 23	3.47	3.06	3.95	0.36	1.24	1.05	2.29	3.53	2.69
gene2876	TCF24	transcription factor 24	1.39	0.21	2.41	0	0.05	0.14	1.38	4.88	1.25
gene2877	LOC106030621	uncharacterized LOC106030621, transcript variant X2	20.47	6.95	9.62	5.01	5.78	5.54	16.39	15.65	14.63
gene2882	MYBL1	v-myb avian myeloblastosis viral oncogene homolog-like 1, transcript variant X1	8.63	8.31	8.04	0.91	0.34	0.67	2.84	3.78	6.24
gene2925	ITGB1BP1	integrin beta 1 binding protein 1, transcript variant X2	52.41	38.96	53.13	10.31	14.17	18	49.57	46.03	46.11
gene2935	RRM2	ribonucleotide reductase M2	33.32	37.1	41.37	2.57	1.83	1.19	32.62	25.89	43.63
gene2944	ATP6V1C2	ATPase, H+ transporting, lysosomal 42kDa, V1 subunit C2, transcript variant X1	10.66	4.87	8.12	2.97	3.48	4.77	7.98	7.83	10.14
gene2959	FAM84A	family with sequence similarity 84, member A	2.97	0.45	3.98	0.18	0.26	0.26	2.17	3.14	1.54
gene2975	VSNL1	visinin-like 1	9.38	2.37	14.26	2.46	1.77	2.04	8.85	11.85	4.38
gene30	ARHGAP19	Rho GTPase activating protein 19, transcript variant X1	8.35	8.8	9.12	0.68	0.73	0.98	3.16	5.38	9.37
gene3005	TXK	TXK tyrosine kinase, transcript variant X1	10.56	10.1	6.09	0.45	1.35	1.66	3.51	6.54	18.6
gene3013	CWH43	cell wall biogenesis 43 C-terminal homolog, transcript variant X1	6.28	0.18	4.63	0.08	0.37	0.13	2.61	4.5	3.4
gene302	SRGN	serglycin	267.65	197.99	175.49	48.08	51	56.85	248.99	415.18	280.96
gene3021	RASL11B	RAS-like, family 11, member B	39.83	54.72	84.91	11.01	16.72	19.86	63.16	61.83	24.81
gene3024	LNX1	ligand of numb-protein X 1, E3 ubiquitin protein ligase, transcript variant X1	3.45	0.04	2.39	0	0.1	0.17	0.59	0.59	1.14
gene3044	PPAT	phosphoribosyl pyrophosphate amidotransferase, transcript variant X1	15.79	13.96	7.66	2.57	3.7	6.77	6.35	5.98	18.07
gene3047	BCL2L14	BCL2-like 14 (apoptosis facilitator), transcript variant X2	2.13	0.82	1	0.13	0.26	0.47	1.21	1.43	1.74
gene313	DNA2	DNA replication helicase/nuclease 2	3.06	3.9	2.63	0.3	0.83	0.75	1.59	1.8	3.32
gene3142	CCDC77	coiled-coil domain containing 77, transcript variant X1	3.94	4.86	3.45	1.65	1.76	1.94	2.22	3.47	3.9
gene3145	SLC6A12	solute carrier family 6 (neurotransmitter transporter), member 12	1.11	0.1	1.85	0	0.06	0.03	1.26	3.06	0.75
gene3160	LOC106030963	uncharacterized LOC106030963, transcript variant X2	10.23	18.51	8.22	3.28	2.41	4.73	5.46	6.16	15.73
gene3216	TRIM24	tripartite motif containing 24, transcript variant X1	14.7	10.78	8.84	3.33	4.99	4.57	4.78	5.1	15.95
gene3217	SVOPL	SVOP-like	1.05	0.86	0.64	0.21	0.12	0.31	0.48	0.46	1.42
gene322	DNAJC12	DnaJ (Hsp40) homolog, subfamily C, member 12	29.94	2.25	18.01	3.18	5.32	3.87	17.28	22.26	16.98
gene3222	LOC106031024	uncharacterized LOC106031024	4.63	3.26	5.05	0.54	0.6	1.3	4.84	4.99	4.17
gene3225	TBXAS1	thromboxane A synthase 1 (platelet), transcript variant X1	3.35	1.61	2.29	0.48	0.52	0.77	2.53	2.72	2.28
gene3228	SPIC	Spi-C transcription factor (Spi-1/PU.1 related), transcript variant X3	41.48	38.81	22.19	0.21	1.09	1.31	10.43	5.62	128.27
gene3275	CORO1C	coronin, actin binding protein, 1C	132.09	134.4	96.42	50.12	52.15	48.8	89.6	100.26	162.42
gene3276	SELPLG	selectin P ligand	27.16	22.03	19	8.39	7.87	7.14	12.95	18.56	40.19
gene3292	LOC106031104	disintegrin and metalloproteinase domain-containing protein 20-like	2.45	1.39	3.44	0.45	1.11	1.43	2.88	4.1	2.22
gene3293	LOC106031105	disintegrin and metalloproteinase domain-containing protein 9-like	0.62	0.81	1.41	0.13	0.55	0.34	1.2	1.67	0.89
gene3296	ACAD10	acyl-CoA dehydrogenase family, member 10, transcript variant X1	5.54	4.14	5.18	1.78	2.22	1.9	4.34	2.97	3.36
gene3301	FAM109A	family with sequence similarity 109, member A, transcript variant X2	6.03	7.61	5.26	1.59	2.52	3.37	8.57	8.66	7.09
gene3313	KNTC1	kinetochore associated 1	1.53	1.76	1.48	0.52	0.61	0.38	1.43	1.48	1.88
gene3320	B3GNT4	UDP-GlcNAc:betaGal beta-1,3-N-acetylglucosaminyltransferase 4	10.96	6.08	7.61	3.64	3.28	3.82	9.3	10.93	8.76
gene3324	BCL7A	B-cell CLL/lymphoma 7A, transcript variant X1	12.02	9.79	10.58	4.92	6.11	6.82	11.14	10.33	15.91
gene3332	RHOF	ras homolog family member F (in filopodia)	75.86	68.3	52.88	14.75	13.53	10.97	31.48	25.93	77.93
gene3346	LOC106031151	uncharacterized LOC106031151, transcript variant X1	2.78	0.13	0.59	0.02	0.12	0	0.38	1.68	0.1
gene3353	CCDC62	coiled-coil domain containing 62	1.06	0.62	1	0.24	0.26	0.49	0.82	0.6	2.02
gene3366	RILPL2	Rab interacting lysosomal protein-like 2	112.43	107.44	127.77	41.06	24.88	40.89	118.48	66.05	75.53
gene3401	FZD10	frizzled class receptor 10	4.65	1.48	3.14	0.51	0.56	0.49	3.14	3.93	2.65
gene3418	NOC4L	nucleolar complex associated 4 homolog	21.2	18.47	22.72	9.56	9.89	12.51	20.05	33.32	19.26
gene342	RTKN2	rhotekin 2, transcript variant X2	7.26	5.9	6.1	2.1	2.87	3.63	5.43	5.25	7.37
gene3455	CDC45	cell division cycle 45	4.19	3.96	3.53	0.44	0.28	0.25	1.88	2.05	6.15
gene3480	LOC106031434	somatomedin-B and thrombospondin type-1 domain-containing protein-like	17.27	12.11	13.76	4.64	8.68	8.56	20.85	15.62	15.33
gene3485	LOC106031279	uncharacterized LOC106031279	2.67	3.46	2.4	0.35	0.4	1.27	1.88	5.18	1.99
gene3487	LOC106031283	Ig lambda chain V-I region BL2-like isoform X50	5281.06	8620.75	2596.23	823.85	748.59	381.54	1797.8	1957.49	26539.8
gene349	CDK1	cyclin-dependent kinase 1	51.81	41.68	44.93	5.43	3.8	2.77	31.87	32.61	54.08
gene3515	SMPD4	sphingomyelin phosphodiesterase 4, neutral membrane (neutral sphingomyelinase-3), transcript variant X1	15.51	13.05	15.35	5.64	4.9	9.09	7.96	11.47	10.57
gene3533	ANHX	anomalous homeobox, transcript variant X1	2.59	1.67	2.48	0.11	0.13	0.78	2.1	1.44	2.95
gene3557	LOC106031353	dynein light chain 1, cytoplasmic-like	9.58	5.76	8.12	1.66	1.85	1.95	10.98	4.81	3.17
gene3558	LOC106031351	dynein light chain 1, cytoplasmic, transcript variant X3	437.94	358.91	550.67	76.29	64.21	109.45	604.36	614.14	486.72
gene3569	PXN	paxillin, transcript variant X1	69.96	92.02	71.82	29.63	34.65	45.07	83.5	103.99	118.48
gene3574	CIT	citron rho-interacting serine/threonine kinase	2.96	2.76	2.36	0.47	0.66	0.52	2.44	1.99	4.38
gene3609	LOC106031475	uncharacterized LOC106031475	8.14	7.16	11.51	2.65	3.27	4.27	7.3	6.59	6.14
gene3660	MRPS10	mitochondrial ribosomal protein S10	14.38	14.36	16.99	4.49	6.08	6.93	10.63	11.46	15.01
gene3669	TRAF5	TNF receptor-associated factor 5, transcript variant X1	25.52	21.06	15.8	4.17	4.65	4.53	11.9	13.76	38.88
gene3673	NEK2	NIMA-related kinase 2	22.07	21.14	17.99	3.34	5.56	5.24	9.96	7.47	20.62
gene3678	DTL	denticleless E3 ubiquitin protein ligase homolog (Drosophila)	2.42	2.57	1.99	0.71	0.69	1.63	1.19	1.13	2.39
gene3687	LBR	lamin B receptor, transcript variant X1	46.94	37.89	33.5	10.76	17.78	24.05	18.77	19.85	47.17
gene3731	CENPF	centromere protein F, 350/400kDa	1.64	1.63	0.93	0.37	0.17	0.19	1.34	0.78	2.02
gene3796	TMEM229B	transmembrane protein 229B, transcript variant X9	2.12	1.85	2.24	0.57	0.63	1.08	1.38	1.43	2.17
gene3829	ARHGAP11A	Rho GTPase activating protein 11A, transcript variant X1	11.19	10.74	11.33	2.46	2.73	5.11	7.02	6.85	17.08
gene385	GPRIN2	G protein regulated inducer of neurite outgrowth 2, transcript variant X1	2.13	1.32	2.2	0.16	0	0.7	1.56	1.4	1.86
gene3885	RASSF7	Ras association (RalGDS/AF-6) domain family (N-terminal) member 7, transcript variant X3	1.59	0.54	1.18	0.06	0.2	0.18	0.82	0.8	0.79
gene3889	IRF7	interferon regulatory factor 7	17.63	5.41	54.25	4.22	6.86	6.1	36.15	50.66	10.35
gene3891	PIDD1	p53-induced death domain protein 1	5.09	3.25	5.14	1.4	1.53	2.29	2.76	3.14	3.81
gene390	OGDHL	oxoglutarate dehydrogenase-like, transcript variant X1	1.04	0.66	0.71	0.03	0	0.15	0.46	0.3	0.67
gene3916	SLC15A1	solute carrier family 15 (oligopeptide transporter), member 1	1.51	0	8.04	0.07	0	0	0.8	1.04	1.37
gene3921	GPR18	G protein-coupled receptor 18	13.33	10.95	14.54	0.36	2.14	0.52	3.55	3.07	18.71
gene3923	LOC106031807	G-protein coupled receptor 183-like, transcript variant X1	4.54	6.06	1.42	0.1	0.15	0.2	0.74	1.03	6.13
gene3951	LOC106031921	semaphorin-4G-like	17.87	6.61	24.97	6.41	6.76	5.48	8.23	20.86	6.81
gene3981	COL17A1	collagen, type XVII, alpha 1	27.62	0.1	42.51	0.68	0.56	0.47	25.51	134.61	13.96
gene4012	LOC106031877	uncharacterized LOC106031877	0.79	0.54	1.58	0.1	0.16	0.16	0.24	0.75	0.62
gene4029	ACSL5	acyl-CoA synthetase long-chain family member 5, transcript variant X1	4.39	4.64	4.26	0.25	0.24	0.96	1.6	1.04	6.88
gene4037	PLEKHS1	pleckstrin homology domain containing, family S member 1, transcript variant X2	1.15	3.08	3.68	0.2	1.62	0.18	2.11	3.88	4.71
gene4053	GFRA1	GDNF family receptor alpha 1, transcript variant X3	2.44	5.18	0.89	0.95	1.19	1.81	3.14	2.19	3.05
gene4087	LRRC31	leucine rich repeat containing 31, transcript variant X4	1.8	1.2	1.29	0.26	0.51	0.42	0.64	1.38	4.31
gene4090	LOC106031985	uncharacterized LOC106031985, transcript variant X2	1.87	0.71	1.98	0.07	0.22	0.18	0.56	1.2	2.15
gene410	LOC106032461	uncharacterized LOC106032461	7.76	7.83	6.14	0.33	0.24	0.16	2.4	2.07	8.53
gene4110	ECT2	epithelial cell transforming 2, transcript variant X1	3.29	2.9	3.26	0.47	0.39	0.3	1.86	1.56	3.48
gene4152	LAMP3	lysosomal-associated membrane protein 3	53.84	52.48	30.25	3.61	3.84	4.6	16.14	17.1	73.93
gene4181	CARD11	caspase recruitment domain family, member 11, transcript variant X1	38.74	29.98	23.1	4.21	4.37	6.3	17.58	7.12	36.77
gene42	CRTAC1	cartilage acidic protein 1	9.19	0.12	11.46	0.03	0	0.17	3.18	10.7	5.85
gene4226	TNFRSF13B	tumor necrosis factor receptor superfamily, member 13B	2.86	5.75	2.49	0.22	0.11	0.13	0.29	0.37	5.6
gene4240	GID4	GID complex subunit 4	18.31	15.4	16.48	5.84	6.79	10.27	18.88	18.55	15.24
gene4250	SHMT1	serine hydroxymethyltransferase 1 (soluble)	5.48	6.89	5.6	2.49	1.75	2.37	5.29	5.95	6.2
gene4253	SLC5A10	solute carrier family 5 (sodium/sugar cotransporter), member 10, transcript variant X1	3.48	1.63	3.71	0.09	0.22	0.22	1.3	1.87	4.16
gene4254	FAM83G	family with sequence similarity 83, member G	1.61	0	2.59	0	0	0.08	3.59	12.05	1.5
gene4269	LOC106032129	uncharacterized LOC106032129	8	8.28	8.2	2.13	3.91	4.08	6.2	4.39	8.72
gene4274	LOC106032135	mesothelin-like	0.38	0.22	1.01	0.04	0.09	0.04	0.29	0.88	0.19
gene4291	SYNGR3	synaptogyrin 3, transcript variant X1	65.21	50.01	27.49	16.51	19.37	11.55	21.82	20.67	63.15
gene43	R3HCC1L	R3H domain and coiled-coil containing 1-like	9.81	8.95	11.43	1.83	1.07	4.25	11.02	12.49	11.43
gene4341	FHDC1	FH2 domain containing 1	4.28	0.19	5.21	0	0.42	0.73	4.79	6.18	3.34
gene4483	TPD52L1	tumor protein D52-like 1, transcript variant X2	1.23	1.63	3.62	0.68	0.5	0.43	1.49	1.85	2.97
gene4504	THEMIS	thymocyte selection associated	5.96	5.97	3.41	0.38	0.21	0.41	1.07	1.12	6.72
gene4545	MYB	v-myb avian myeloblastosis viral oncogene homolog, transcript variant X2	3.82	3.16	3.68	0.74	0.33	1.08	2.78	5.19	4.63
gene455	LOC106033034	dual specificity protein phosphatase 13 isoform B-like	1.19	0.55	2.93	0.53	0.39	0.58	3.2	2.09	0.78
gene4552	MTFR2	mitochondrial fission regulator 2	7.72	8.29	8.14	2.13	2.83	2.89	4.63	5.22	9.54
gene4555	MAP7	microtubule-associated protein 7, transcript variant X1	4.17	0.78	3.35	0.11	0.38	0.32	2.27	4.36	2.94
gene4566	LOC106032402	p53 apoptosis effector related to PMP-22-like	44.8	0.68	85.23	1.17	1.12	4.29	43.71	65.05	33.51
gene4576	ABRACL	ABRA C-terminal like, transcript variant X1	82.78	61.05	98.55	16.95	16.26	24.92	72.76	71.16	79.24
gene4585	FAM26F	family with sequence similarity 26, member F	6.49	4.05	6.11	1.23	1.44	0.91	1.7	1.16	6.6
gene4615	AMD1	adenosylmethionine decarboxylase 1	59.6	48.35	51.33	21.32	28.49	34.69	63.16	72	58.59
gene462	AP3M1	adaptor-related protein complex 3, mu 1 subunit	23.12	23.78	24.23	9.89	9.56	12.81	24.98	21.53	25.61
gene4628	PPIL6	peptidylprolyl isomerase (cyclophilin)-like 6	0.53	0.23	1.23	0	0	0.18	0.59	1.49	1
gene4642	OSTM1	osteopetrosis associated transmembrane protein 1	37.02	22.71	28.91	9.59	10.73	14.17	22.98	18.24	30.99
gene4651	AIM1	absent in melanoma 1	6	0.39	7.38	0.11	0.13	0.5	6.94	12.46	5.61
gene4653	PRDM1	PR domain containing 1, with ZNF domain, transcript variant X1	5.76	4.67	3.29	1.08	1.68	1.17	3.8	7.29	10.3
gene4664	LIN28B	lin-28 homolog B (C. elegans)	0.07	0.07	0.06	0	0.01	0	0.05	0.05	0.47
gene4710	SH3RF2	SH3 domain containing ring finger 2	8.02	0.05	6.66	0.12	0.06	0.11	7.14	8.51	2.69
gene4738	LOC106032749	uncharacterized LOC106032749	7.67	7.27	7.46	2.71	1.95	4.66	5.69	6.54	4.96
gene4772	TCF7	transcription factor 7 (T-cell specific, HMG-box), transcript variant X1	26.07	30.68	14.92	1.99	1.51	2.63	4.84	6.26	42.74
gene4794	LOC106032697	myeloid protein 1	4.8	13.8	10.01	0.11	0	0.11	8.29	6.69	4.16
gene4795	LOC106032655	leukocyte cell-derived chemotaxin-2-like	878.23	21.5	923.46	33.73	9.89	67.79	440.01	748.66	239.89
gene4820	CLK4	CDC-like kinase 4, transcript variant X1	57.97	45.33	53.69	14.79	32.54	31.91	51.36	50.05	57.32
gene4828	CNOT6	CCR4-NOT transcription complex, subunit 6, transcript variant X1	56.7	50.54	44.08	18.82	20.33	27.78	32.88	37.67	73.61
gene4833	LOC106032673	deoxycytidine kinase-like	29.46	39.73	19.42	2.57	1.99	1.31	21.71	10.46	38.58
gene4834	LOC106032894	leukotriene C4 synthase-like, transcript variant X4	17.95	21.47	22.18	9.62	5.19	9.86	15.81	29.58	11.07
gene4837	LOC106032815	leukotriene C4 synthase-like	7.38	3.63	2.72	1.16	1.27	0.61	1.53	2.22	4.17
gene4855	CD74	CD74 molecule, major histocompatibility complex, class II invariant chain, transcript variant X1	7537.12	4918.53	4793.8	2899.57	2985.23	2186.91	6302.35	3752.99	9920.47
gene4864	LOC106032833	uncharacterized LOC106032833	1	2.11	1.53	0.26	0.8	0.18	1.66	1.79	2.92
gene4867	CCDC69	coiled-coil domain containing 69	12.58	12.43	7.47	0.91	1.4	2.53	4.31	4.61	15.38
gene4870	FAT2	FAT atypical cadherin 2	0.53	0	0.5	0.01	0.01	0.03	0.25	0.61	0.37
gene4884	LOC106032703	uncharacterized LOC106032703	61.57	0	159.06	0	0	1.96	118.56	26.15	85.25
gene4897	LOC106032849	uncharacterized LOC106032849	1.23	1.59	0.89	0.29	0.41	0.39	1.27	2.16	2.31
gene4903	LOC106032855	T-cell immunoglobulin and mucin domain-containing protein 4-like, transcript variant X1	32.51	74.71	22.96	0.47	4.24	2.67	8.38	9.34	155.46
gene4906	ITK	IL2-inducible T-cell kinase	33.93	31.55	13.84	5.1	5.46	4.87	8.05	6.52	29.35
gene4907	CYFIP2	cytoplasmic FMR1 interacting protein 2, transcript variant X2	25.3	26.79	14.1	3	3.46	4.58	6.48	6.8	30.04
gene4909	NIPAL4	NIPA-like domain containing 4, transcript variant X2	8.89	1.99	9.4	1.19	1.21	1.3	8.69	11.19	5.49
gene4911	SOX30	SRY (sex determining region Y)-box 30	0.91	0.4	0.84	0.16	0.09	0.06	0.44	0.98	0.58
gene4927	LOC106032874	serine protease inhibitor Kazal-type 5-like	3.42	0.06	12.69	0.24	0.19	0.45	12.8	3.2	6.54
gene4935	ARL10	ADP-ribosylation factor-like 10	6.72	3.7	5.25	1.44	1.5	2.38	5.73	3.18	3.39
gene495	LOC106033972	uncharacterized LOC106033972	0.68	0.44	0.23	0	0.03	0.08	0.33	0.2	0.25
gene496	LOC106033965	T-cell surface glycoprotein CD8 beta chain-like	3.9	4.46	0.98	0.31	0	0	2.51	1.73	2.56
gene497	CD8A	CD8a molecule	18.5	20.83	19.22	0.72	0.94	1.38	5.9	3.16	28.17
gene4989	TCEANC2	transcription elongation factor A (SII) N-terminal and central domain containing 2	15.37	13.06	12.85	6.67	4.7	5.75	13.28	15.43	14.49
gene5018	ORC1	origin recognition complex, subunit 1, transcript variant X2	6.42	6.38	4.98	1.21	1.2	1.69	1.22	2.65	7.37
gene5054	STIL	SCL/TAL1 interrupting locus, transcript variant X1	3.41	3.47	3.3	0.59	1.28	1.42	1.85	1.97	3.08
gene5095	MUTYH	mutY DNA glycosylase	9.52	13.22	9.14	1.77	3.2	6.54	7	17.66	7.93
gene5109	KIF2C	kinesin family member 2C, transcript variant X1	5.69	5.89	5.8	0.76	0.84	0.73	2.35	2.32	5.25
gene5113	TMEM53	transmembrane protein 53	5	3.73	3.94	1.34	1.14	2.04	2.59	1.64	3.59
gene5120	FA2H	fatty acid 2-hydroxylase	5.51	0.81	4.28	0.73	0.44	0.44	5.04	5.01	3.67
gene5122	RFWD3	ring finger and WD repeat domain 3, transcript variant X2	5.42	3.73	4.22	1.74	2.1	1.53	2.65	2.41	4.52
gene5134	CMTR2	cap methyltransferase 2, transcript variant X5	19.49	10.22	27.67	6.86	9.33	7.86	18.58	14.87	13.33
gene5146	HSD11B2	hydroxysteroid (11-beta) dehydrogenase 2	4.33	5.78	3.02	0.82	0.28	1.84	6.13	2.7	9.42
gene5161	LOC106033135	uncharacterized LOC106033135	28.74	20.69	30.6	7.96	9.49	11.34	21.68	25.34	27.55
gene5162	RLTPR	RGD motif, leucine rich repeats, tropomodulin domain and proline-rich containing	11.08	11.76	8.08	0.27	0.31	0.33	0.68	1.26	10.06
gene5173	E2F4	E2F transcription factor 4, p107/p130-binding	21.45	17.65	18.44	7.55	7.09	9.47	15.24	16.2	20.91
gene5179	CENPT	centromere protein T	15.04	12.89	12.92	4.76	4.74	6.77	9.47	12.05	14.74
gene5185	LOC106033294	C-C motif chemokine 3-like	83.15	85.97	8.73	10.62	7.07	1.17	37.36	18.3	174.95
gene5198	GFOD2	glucose-fructose oxidoreductase domain containing 2	9.9	8.88	8.07	3.36	4.18	6.61	8.64	10.36	11.22
gene5217	ADGRG5	adhesion G protein-coupled receptor G5, transcript variant X2	20.2	9.77	11.33	8.86	3.59	4.33	8.74	5.3	18.9
gene5236	LRP3	low density lipoprotein receptor-related protein 3, transcript variant X1	31.41	20.55	21.18	10.05	11.99	16.11	16.89	39.61	28.48
gene525	SLBP	stem-loop binding protein	30.29	24.79	46.17	2.48	3.05	2.05	18.21	10.71	30.56
gene5305	CENPN	centromere protein N, transcript variant X1	7.97	5.94	8.4	0.53	0.74	0.83	6.45	6.65	9.79
gene5327	CCNF	cyclin F	7.29	7.35	7.14	1.42	0.61	1.32	2.13	3.02	7.14
gene5334	NUBP2	nucleotide binding protein 2	34.53	30.61	30.87	10.47	13.26	15.66	28.26	36.28	31.13
gene5338	METRN	meteorin, glial cell differentiation regulator	0.8	1.58	2.66	0.1	0.46	0.18	2.38	1.3	0
gene5346	LOC106033391	myeloid-associated differentiation marker-like	18.34	19.51	19.35	3.26	3.12	3.66	12.52	12.88	27.26
gene5347	45181	septin 12, transcript variant X1	26.42	20.96	19.1	6.03	6.5	7.65	14.36	14.64	33.37
gene5356	NLRC3	NLR family, CARD domain containing 3, transcript variant X2	33.05	29.33	19.15	2.75	2.64	3.53	7.33	7.17	31.92
gene5375	LOC106033360	chromosome unknown open reading frame, human C7orf26	33.58	26.65	31.77	4.84	11.4	7.67	31.91	14.47	22.23
gene5386	PDIA2	protein disulfide isomerase family A, member 2	0.12	0.36	0.92	0	0.12	0	0.83	0.77	0.26
gene539	POLN	polymerase (DNA directed) nu, transcript variant X1	0.33	0.28	0.2	0.04	0.08	0.09	0.19	0.15	0.33
gene540	HAUS3	HAUS augmin-like complex, subunit 3	4.12	5.46	4.59	1.81	1.48	2.05	4.88	5.2	6.55
gene5402	IL20RB	interleukin 20 receptor beta	8.4	1.98	8.19	0.7	1.81	2.07	3.99	4.46	3.66
gene5420	MPV17L	MPV17 mitochondrial membrane protein-like	4.24	3.69	3.78	1.02	0.76	1.44	3.91	3.48	3.32
gene5524	ADAP1	ArfGAP with dual PH domains 1, transcript variant X1	10.23	8.16	8.61	2.55	2.98	4.34	8.03	9.52	17.11
gene5526	LOC106033533	cytochrome P450 2W1-like	7.17	0.16	10.05	1.34	1.36	0.27	4.24	2.38	3.38
gene5530	GPER1	G protein-coupled estrogen receptor 1, transcript variant X1	11.64	9.43	7.05	1.58	1.71	1.4	5.4	4.73	18.59
gene5552	TTYH3	tweety family member 3, transcript variant X1	58.52	43.32	24.66	14.16	15.47	28.52	21	43.17	47.47
gene5558	LOC106033637	chromosome unknown open reading frame, human C15orf48	43.48	23.84	47.71	11.21	12.62	16.21	51.9	44.48	26.89
gene556	GRK4	G protein-coupled receptor kinase 4, transcript variant X1	46.96	36.07	36.57	9.89	9.56	14.69	36.66	30.05	47.64
gene557	LOC106034660	uncharacterized LOC106034660	5.54	4.14	4.08	1.03	1.63	2.68	3.76	3.99	5.99
gene5598	LOC106033662	uncharacterized LOC106033662, transcript variant X1	242.8	208.19	202.5	67.91	78.78	130.09	201.87	229.47	206.67
gene5647	CCNB2	cyclin B2	34.7	29.5	31.95	4.29	4.17	5.47	12.75	16.23	29.07
gene5650	LOC106033710	uncharacterized LOC106033710, transcript variant X1	20.75	11.64	10.56	8.08	7.4	4.53	16.58	7.76	14.63
gene5673	OTUD7A	OTU deubiquitinase 7A, transcript variant X1	5.2	4.87	4.03	0.82	0.96	0.72	3.55	4.54	12.89
gene5678	GTF2A2	general transcription factor IIA, 2, 12kDa	118.84	112.7	135.03	46.97	40.87	56.98	112.82	115.58	99.41
gene5713	CIB2	calcium and integrin binding family member 2, transcript variant X4	2.67	3.28	1.6	0.74	0.27	0.43	0.82	0.73	6.54
gene5730	NRG4	neuregulin 4, transcript variant X6	2.66	1.75	2.89	0.59	1.79	1.24	2.38	0.85	4.81
gene5740	LPXN	leupaxin	33.98	28.25	23.41	2.31	3.43	6.52	8.26	6.27	37.58
gene5743	MPEG1	macrophage expressed 1	107.63	98.71	61.92	36.62	43.67	30.44	65.19	56.94	127.85
gene5752	E2F8	E2F transcription factor 8	2.88	2.21	3.12	0.67	0.69	0.41	1.72	1.34	3.56
gene5767	GAS2	growth arrest-specific 2, transcript variant X4	0.99	1.72	3.43	0.18	0.13	0.85	2.66	2.7	0.9
gene5782	KIF18A	kinesin family member 18A	3.62	3.67	2.7	0.78	0.53	0.53	1.18	1.73	4.3
gene5853	PLEKHA7	pleckstrin homology domain containing, family A member 7, transcript variant X1	2.36	0.75	2.3	0.37	0.32	0.63	1.29	1.38	1.38
gene5867	PTPRF	protein tyrosine phosphatase, receptor type, F, transcript variant X1	16.43	3.66	16.78	1	0.87	3.1	11.09	19.87	7.39
gene5872	CDC20	cell division cycle 20	19.26	12.92	17.26	1.74	1.29	0.71	7.16	6.64	16.49
gene5880	PIF1	PIF1 5'-to-3' DNA helicase	9.3	3.65	6.56	0.05	0.14	0.19	5.84	6.35	5.94
gene5926	GNG5	guanine nucleotide binding protein (G protein), gamma 5	209.2	199.17	257.66	68.86	86.18	93.7	203.29	139.5	167.7
gene5934	MCOLN2	mucolipin 2, transcript variant X2	6.56	4.32	5.31	0.62	1	1.68	1.58	1.97	7.68
gene5947	ODF2L	outer dense fiber of sperm tails 2-like, transcript variant X1	1.47	0.06	1.39	0.11	0.25	0.34	1.76	1.41	0.34
gene5948	LOC106034001	calcium-activated chloride channel regulator 2-like	4.66	0.28	6.23	0.37	0.41	0.32	6.18	7.55	1.92
gene5963	LRRC8B	leucine rich repeat containing 8 family, member B	7.91	8.86	5.68	1.77	2.21	1.67	5.45	4.55	21.13
gene6041	FUT4	fucosyltransferase 4 (alpha (1,3) fucosyltransferase, myeloid-specific)	13.26	8.22	6.62	0.99	1.46	1.27	4	1.82	15.58
gene6043	ANKRD49	ankyrin repeat domain 49	22.57	15.4	22.72	7.48	8.06	6.62	17.05	15.32	23.79
gene6100	KATNA1	katanin p60 (ATPase containing) subunit A 1	11.45	7.13	12.46	2.62	3.57	7.17	10.82	10.32	10.41
gene6107	LOC106034274	uncharacterized LOC106034274, transcript variant X2	15.77	0.87	11.06	1.59	2.54	1.3	9.06	21.14	4.76
gene6185	MZB1	marginal zone B and B1 cell-specific protein	149.8	186.93	110.44	1.37	3.27	3.04	9.97	11.97	223.74
gene6189	LOC106034340	uncharacterized LOC106034340	15.73	13.91	25.28	3.39	3.19	1.36	9.44	16.04	13.5
gene6211	LCP2	lymphocyte cytosolic protein 2 (SH2 domain containing leukocyte protein of 76kDa)	52.44	38.71	31.16	15.6	19.09	18.12	62	32.03	59.78
gene6212	LOC106034330	chromosome unknown open reading frame, human C5orf58, transcript variant X2	8.73	10.34	5.33	1.79	1.93	4.86	13.65	4.92	11.19
gene6215	FOXI1	forkhead box I1, transcript variant X1	1.15	1.2	0.56	0.09	0.22	0.25	0.51	0.35	2.52
gene6216	DOCK2	dedicator of cytokinesis 2	21.4	20.39	12.39	2.82	3.38	4.47	8.03	6.37	28.5
gene6218	SPDL1	spindle apparatus coiled-coil protein 1, transcript variant X4	6.67	7.63	6.25	1.96	3.36	3.39	5.85	3.31	10.4
gene6229	TENM2	teneurin transmembrane protein 2, transcript variant X1	1.14	0.03	0.96	0.04	0.03	0.06	1.06	0.78	0.47
gene6237	HMMR	hyaluronan-mediated motility receptor (RHAMM), transcript variant X2	6.72	6.64	7.3	0.85	0.88	0.72	4.43	4.82	13.26
gene6243	GABRA1	gamma-aminobutyric acid (GABA) A receptor, alpha 1, transcript variant X4	1.48	0.76	0.93	0.29	0.53	0.45	0.53	0.88	0.78
gene6251	ATP10B	ATPase, class V, type 10B, transcript variant X1	1.73	0.13	1.4	0.01	0.06	0.35	1.08	2.49	0.62
gene6254	LOC106034391	uncharacterized LOC106034391, transcript variant X2	8.47	6.2	6.67	1.43	1.99	2.59	3.36	3.35	7.25
gene6255	PTTG1	pituitary tumor-transforming 1, transcript variant X2	12.86	12.21	12.07	1.26	0.87	1.24	6.17	6.56	10.33
gene6260	FABP6	fatty acid binding protein 6, ileal, transcript variant X1	50.7	37.03	57.05	13.28	27.5	22.07	34.15	35.82	41.46
gene6262	LOC106034367	uncharacterized LOC106034367	8.85	7.23	7.85	2.59	3.04	5.58	8.32	7.91	10.49
gene6268	LOC106034343	ovomucoid-like, transcript variant X1	16.1	0	91.11	0.48	0	4.22	72.9	38.58	48.11
gene6272	SLC26A2	solute carrier family 26 (anion exchanger), member 2, transcript variant X5	5.18	3.63	4.81	1.67	1.9	2.25	6.65	6.38	3.66
gene6301	USP40	ubiquitin specific peptidase 40, transcript variant X2	9.63	6.85	7.2	2.46	2.83	4.41	7.11	5.8	8.76
gene6349	ABCA12	ATP-binding cassette, sub-family A (ABC1), member 12	6.49	0.19	7.3	0.29	0.11	0.53	5.27	4.4	3.46
gene6352	BARD1	BRCA1 associated RING domain 1	4.9	4.07	3.08	1.1	1.4	0.98	1.32	2.57	4.26
gene645	FGFBP1	fibroblast growth factor binding protein 1	47.87	0	71.6	0	0	1.47	42.73	163.83	50.23
gene6454	LOC106034700	uncharacterized LOC106034700	3.8	2.14	1.8	0.6	0.87	0.72	4.57	3	4.39
gene647	PROM1	prominin 1, transcript variant X1	2.11	0.79	0.84	0.23	0.24	0.92	1.34	2.25	1.03
gene6475	PITPNC1	phosphatidylinositol transfer protein, cytoplasmic 1, transcript variant X1	70.8	46.83	56.18	17.3	20.48	22.85	58.92	78.98	70.82
gene6479	KPNA2	karyopherin alpha 2 (RAG cohort 1, importin alpha 1), transcript variant X1	33.59	30.39	32.99	1.55	2.02	1.97	16.02	16.71	36.12
gene6489	LOC106034685	sterile alpha motif domain-containing protein 9-like, transcript variant X1	22.88	7.86	57.95	6.67	3.62	0.26	38.41	54.49	10.83
gene6495	RNF135	ring finger protein 135	51.15	10.05	68.85	11.17	13.78	8.84	41.34	56.58	8.09
gene6499	SUZ12	SUZ12 polycomb repressive complex 2 subunit	19.69	14.17	14.03	4.62	8.99	9.05	16.71	17.66	23.54
gene6501	UTP6	UTP6, small subunit (SSU) processome component, homolog (yeast)	15.94	9.97	11.91	5.88	6.73	8.84	14.16	19.73	11.81
gene6559	LOC106034831	CMRF35-like molecule 2, transcript variant X1	19.5	14.54	14.44	3.22	4.1	6.29	28.17	18.42	26.49
gene6562	LOC106034617	Na(+)/H(+) exchange regulatory cofactor NHE-RF1-like	69.32	66.14	45.53	20.95	18.82	13.97	32.41	50.17	66.57
gene6564	TMEM104	transmembrane protein 104, transcript variant X1	21.87	14.03	11.4	6.06	6.18	9.06	12.27	27.88	21.38
gene658	NCAPG	non-SMC condensin I complex, subunit G	9.34	9.54	9.13	0.92	0.58	1.07	6.23	4.96	12.3
gene6588	HN1	hematological and neurological expressed 1, transcript variant X1	237.42	235.9	276.57	98.13	109.73	99.4	320.56	184.8	209.11
gene6590	NUP85	nucleoporin 85kDa	68.04	50.92	62.06	22.47	25.85	32.96	66.43	45.55	55.13
gene6607	ITGB4	integrin, beta 4, transcript variant X2	13.96	9.1	10.94	4.21	6.44	3.74	9.99	19.3	7.41
gene6621	EVPL	envoplakin, transcript variant X1	7.33	0.09	5.36	0.08	0.11	0.23	5.62	7.12	2.65
gene6630	UBE2O	ubiquitin-conjugating enzyme E2O	29.3	24.12	23.56	11.1	10.41	15.42	20.75	35.59	30.53
gene6651	LOC106034687	uncharacterized LOC106034687	0.76	0.68	0.81	0.07	0.03	0.26	0.31	0.05	0.62
gene6655	LOC106034703	uncharacterized LOC106034703	6.07	4.89	3.2	1.35	2.65	3.45	5.38	5.08	5.41
gene6673	DSP	desmoplakin, transcript variant X1	71.04	1.36	72.04	1.24	1.99	2.98	66.52	104.93	37.78
gene6703	BASP1	brain abundant, membrane attached signal protein 1	78.09	72.98	64.01	22.09	30.48	28.94	29.72	34.34	78.93
gene6723	NDC80	NDC80 kinetochore complex component, transcript variant X1	6.09	6.68	5.49	1.2	0.6	0.58	3.27	2.98	7.63
gene6762	APCDD1	adenomatosis polyposis coli down-regulated 1	40.66	4.53	10.03	3.25	2.9	1.67	21.86	25.37	11.16
gene6792	MC5R	melanocortin 5 receptor, transcript variant X3	56.25	38.64	41.41	7.54	17.01	35.24	25.46	18.27	50.85
gene6811	CKAP2	cytoskeleton associated protein 2	10.46	12.47	10.43	2.5	2.01	2.46	10.11	9.63	13.04
gene6860	LCP1	lymphocyte cytosolic protein 1 (L-plastin)	191.49	183.41	100.15	54.94	54.69	56.9	77.49	84.26	240.83
gene6881	LACC1	laccase (multicopper oxidoreductase) domain containing 1, transcript variant X3	7.1	9.07	4.57	2.02	1.66	4.22	4.66	2.76	6.67
gene6887	TNFSF11	tumor necrosis factor (ligand) superfamily, member 11	13.91	11.01	8.35	3.27	3.76	3.85	4.42	5.24	16.41
gene695	SLC34A2	solute carrier family 34 (type II sodium/phosphate cotransporter), member 2, transcript variant X1	1.28	0.02	0.89	0	0.1	0.05	1	0.59	0.52
gene6965	MTNR1A	melatonin receptor 1A, transcript variant X1	1.16	1.55	0.59	0.06	0.06	0.08	0.42	0.63	1.23
gene6986	CENPU	centromere protein U, transcript variant X3	12.56	11.3	13.2	1.34	1.95	1.78	8.33	6.53	10.46
gene6987	PRIMPOL	primase and polymerase (DNA-directed), transcript variant X1	18.84	21.07	24.47	7.12	12.21	10.05	14.85	9.85	18.81
gene6988	CASP3	caspase 3, apoptosis-related cysteine peptidase	35.39	40.43	26.92	9.36	8.96	9.97	22.12	23.18	45.79
gene6998	LOC106035143	uncharacterized LOC106035143	0.87	1.69	1.51	0	0.28	0	2.56	1.67	0.67
gene7034	LAPTM4B	lysosomal protein transmembrane 4 beta, transcript variant X2	9.25	1.13	5.99	0.67	0.24	0.48	7.38	10.14	6.68
gene7041	POP1	POP1 homolog, ribonuclease P/MRP subunit	2.93	1.74	1.82	0.29	0.36	1.09	1.89	3.56	2.3
gene7068	GRHL2	grainyhead-like 2 (Drosophila)	0.34	0.02	0.26	0	0.02	0.02	0.53	0.53	0.42
gene7086	DCSTAMP	dendrocyte expressed seven transmembrane protein	3.76	2.85	1.26	0.04	0.34	0.1	2.32	5.09	10.01
gene7130	SNAP91	synaptosomal-associated protein, 91kDa, transcript variant X2	9	6.41	4.75	1.2	2.43	2.07	4.15	1.31	12.93
gene715	EVL	Enah/Vasp-like	74.46	79.54	56.55	13.82	10.62	28.31	30.67	41.17	113.72
gene7225	CADPS	Ca++-dependent secretion activator, transcript variant X1	0.65	1.03	1.18	0.13	0.16	0.37	1.05	0.66	0.47
gene7257	LOC106035461	uncharacterized LOC106035461, transcript variant X1	67.08	0.89	36.64	3.14	1.85	0.79	37.02	42.66	12.22
gene7258	LOC106035463	pentafunctional AROM polypeptide-like	27.43	0	5.84	0.03	0	0	2.57	2.99	1.33
gene727	LOC106036145	uncharacterized LOC106036145	2.18	1.21	0.62	0.08	0.08	0.05	0.23	0.12	2.07
gene7285	CHL1	cell adhesion molecule L1-like, transcript variant X1	2.38	0.34	3.2	0.54	0.33	0.78	2.03	4.11	1.15
gene7288	ORC5	origin recognition complex, subunit 5, transcript variant X1	3.92	4.09	4.84	1.03	0.99	2.56	2.02	2.19	4.3
gene7367	LOC106035583	granzyme K-like	2.53	3.31	3.21	0.12	0.47	0.59	2.56	1.16	2.14
gene7368	LOC106035576	granzyme A-like	8.3	7.02	6.21	0.46	0.57	1.19	14.39	6.76	9.1
gene7392	DEPDC1B	DEP domain containing 1B	2.89	1.79	1.62	0.12	0.06	0.06	0.64	0.45	2.94
gene7393	ELOVL7	ELOVL fatty acid elongase 7, transcript variant X2	20.63	7.02	20.31	2.54	3.63	10.38	18.93	24.06	14.15
gene7418	CENPK	centromere protein K, transcript variant X1	19.2	17.91	27.51	10.18	8.47	8.28	21.57	16.62	20.07
gene7427	LOC106035572	interleukin-31 receptor subunit alpha-like	2.65	2.39	0.94	0.19	0.21	0.26	0.83	0.69	3.1
gene7430	CD180	CD180 molecule, transcript variant X1	14.54	8.9	8.02	2.88	1.16	2.91	1.35	1.5	12.62
gene7440	MITD1	MIT, microtubule interacting and transport, domain containing 1	134.94	64.76	206.94	80.54	72.13	70.84	145.07	230.4	80.63
gene7446	MGAT4A	mannosyl (alpha-1,3-)-glycoprotein beta-1,4-N-acetylglucosaminyltransferase, isozyme A, transcript variant X3	20.23	17.6	7.28	5.08	6.04	8.97	16.14	16.99	26.17
gene7471	SLC9A7	solute carrier family 9, subfamily A (NHE7, cation proton antiporter 7), member 7, transcript variant X1	35.9	36.43	20.08	5.25	9.32	7.18	11.68	9.89	42.28
gene7475	LOC106035673	regucalcin-like, transcript variant X1	3.09	0.06	4.19	0.07	0	0	3.97	7.49	1
gene7476	PLCXD1	phosphatidylinositol-specific phospholipase C, X domain containing 1, transcript variant X4	7.21	4.67	5.6	0.97	1.28	2.1	10.64	5.73	8.57
gene7487	LOC106035752	granulocyte-macrophage colony-stimulating factor receptor subunit alpha-like, transcript variant X1	39.12	12.96	26.71	4.79	3.17	7	22.72	15.29	25.45
gene7491	P2RY8	purinergic receptor P2Y, G-protein coupled, 8, transcript variant X3	21.98	21.24	13.37	1.82	1.87	4.14	6.03	5.23	20.17
gene7500	XG	Xg blood group	6.83	0.03	4.65	0	0.08	0.19	5.78	7.41	4.33
gene7568	ASCL4	achaete-scute family bHLH transcription factor 4	1.99	1.19	0.51	0	0.07	0.13	1	0.86	4.72
gene757	LOC106036355	serpin A3-4-like, transcript variant X1	29.81	0.52	40.17	2.05	1.71	2.34	36.81	12.58	20.32
gene7598	NCF4	neutrophil cytosolic factor 4, 40kDa	13.42	10.47	14.47	3.01	3.31	4.72	8.45	6.12	17.14
gene76	BLNK	B-cell linker, transcript variant X1	36.31	29.86	40.88	4.11	7.49	11.05	21.22	20.18	48.9
gene7606	IL2RB	interleukin 2 receptor, beta, transcript variant X1	9.13	5.91	4.75	1.44	3.31	2.92	3.2	3.05	7.35
gene7610	RAC2	ras-related C3 botulinum toxin substrate 2 (rho family, small GTP binding protein Rac2)	280.57	249.25	194.05	41.98	43.86	52.25	132.97	146.06	389.35
gene7614	MFNG	MFNG O-fucosylpeptide 3-beta-N-acetylglucosaminyltransferase, transcript variant X1	8.08	5.35	5.03	0.48	0.9	1.12	2.22	2.87	7.92
gene7617	LGALS2	lectin, galactoside-binding, soluble, 2	7.74	4.79	7.75	2.05	2.28	2.84	5.06	5.95	4.04
gene7619	SH3BP1	SH3-domain binding protein 1	24.26	17.17	14.61	1.68	1.87	2.9	6.41	6.36	24.08
gene7623	LOC106035938	arf-GAP with dual PH domain-containing protein 1-like	2.34	0.11	2.49	0.07	0.03	0.06	1.35	3.13	0.88
gene7638	BAIAP2L2	BAI1-associated protein 2-like 2	1.21	0.27	1.61	0.22	0.35	0.14	2.16	1.39	1.44
gene7668	GRAP2	GRB2-related adaptor protein 2, transcript variant X1	41.86	50.77	26.4	7.92	8.89	6.19	10.15	10.1	38.35
gene7669	FAM83F	family with sequence similarity 83, member F	3.71	0.48	2.25	0.02	0.04	0	1.64	2.25	2.38
gene7675	SLC25A17	solute carrier family 25 (mitochondrial carrier; peroxisomal membrane protein, 34kDa), member 17, transcript variant X1	26.26	12.19	43.87	8.99	8.02	9.64	25.62	20.99	15.51
gene7704	LOC106036032	uncharacterized LOC106036032, transcript variant X1	1.8	0.6	1.65	0.16	0.16	0.23	1.51	1.6	0.85
gene7723	SCGN	secretagogin, EF-hand calcium binding protein	8.65	0	6.87	0	0	0.18	10	9.55	2.06
gene7726	FAM65B	family with sequence similarity 65, member B	40.06	35.83	26.72	5.89	4.85	15.74	22.17	31.26	47.54
gene7808	SLC37A1	solute carrier family 37 (glucose-6-phosphate transporter), member 1, transcript variant X5	6.15	4.5	5.13	0.98	1.59	1.88	4.72	3.61	9.81
gene7810	UBASH3A	ubiquitin associated and SH3 domain containing A	18.77	17.72	12.49	1.39	1.69	1.83	4.87	4.51	25.76
gene7822	RIPK4	receptor-interacting serine-threonine kinase 4	7.03	0.05	5.62	0	0.09	0.21	7.21	13.52	2.44
gene7825	LOC106036132	interferon-induced GTP-binding protein Mx, transcript variant X1	92.1	6.28	188.88	7.27	14.02	4.56	147.6	253.84	6.1
gene7829	DSCAM	Down syndrome cell adhesion molecule	0.21	0.74	0.1	0.05	0.04	0.07	0.08	0.17	0.39
gene7903	GK5	glycerol kinase 5 (putative)	26.82	14.63	23.71	7.54	7.31	16.78	31.8	23.46	21.04
gene7908	ZBTB38	zinc finger and BTB domain containing 38, transcript variant X1	6.72	6.15	6.59	1.9	3.02	2.93	5.31	3.32	14.08
gene7925	LOC106036180	thiamine transporter 2-like	2.09	1.21	1.4	0.34	0.39	1.14	2.62	1.77	1.58
gene7944	NYAP2	neuronal tyrosine-phosphorylated phosphoinositide-3-kinase adaptor 2, transcript variant X2	2.02	0.01	2.11	0.12	0.11	0.12	1.45	1.07	1.23
gene7962	MOGAT1	monoacylglycerol O-acyltransferase 1	1.94	0.14	2.53	0.11	0.15	0.25	0.79	1.05	1.01
gene7964	SGPP2	sphingosine-1-phosphate phosphatase 2	4.8	0.09	6.23	0.33	0.38	0.14	3.91	4.37	1.34
gene7983	NIM1K	NIM1 serine/threonine protein kinase, transcript variant X2	2.54	1.36	1.33	0.27	0.45	0.42	0.58	0.56	1.5
gene8002	C7	complement component 7, transcript variant X1	125.63	160.48	160.19	45.45	68.46	61.98	59.88	57.06	302.8
gene8011	FYB	FYN binding protein, transcript variant X1	38.14	34.57	29.39	5.88	7.34	9.73	16.84	13.93	44.02
gene8025	LOC106036387	S-phase kinase-associated protein 2-like	10	10.04	9.17	3.52	3.76	5.73	7.54	8.62	8.47
gene8030	IL7R	interleukin 7 receptor	49.63	46.83	41.57	25.33	11.91	11.61	16.17	12.03	60.95
gene8059	ARHGEF39	Rho guanine nucleotide exchange factor (GEF) 39, transcript variant X1	2.27	1.85	1.73	0.22	0.11	1.07	2.59	1.26	2.26
gene8061	CA9	carbonic anhydrase IX	5.18	0	9.97	0.1	0	0.39	3.86	7.44	5.02
gene8062	LOC106036305	gamma-secretase subunit Aph-1b-like	33.78	27.93	30.52	15.79	15.68	15.26	38.05	36.09	30.45
gene8077	LOC106036315	killer cell lectin-like receptor subfamily B member 1B allele B	2.87	2.98	2.46	0.17	0.11	0.41	0.6	0.09	4.7
gene8078	CD72	CD72 molecule	21.52	28.05	25.16	0.05	0.09	0.05	1.35	1.51	15.57
gene8089	TICRR	TOPBP1-interacting checkpoint and replication regulator	6.99	6.73	7.44	2.25	2.81	4.15	4.35	6.47	7.95
gene8148	ARRDC4	arrestin domain containing 4	46.2	27.62	49.36	10.24	11.66	14.32	34.12	52.08	52.66
gene8159	LOC106036472	uncharacterized LOC106036472	13.97	0.1	17.07	0.5	0.2	0.61	10.52	12.36	6.1
gene8160	CERS3	ceramide synthase 3, transcript variant X2	2.09	0.13	2.74	0.21	0.25	0.51	2.9	3.38	2.19
gene8204	FIGNL1	fidgetin-like 1, transcript variant X1	7.56	2.83	3.28	2.22	0.37	1.62	0.71	0.8	6.19
gene8205	IKZF1	IKAROS family zinc finger 1 (Ikaros), transcript variant X3	35.26	34.02	20.27	3.32	5.26	5.97	15.67	14.12	54.43
gene8232	LOC106036526	carboxymethylenebutenolidase homolog	5.67	0.12	5.18	0	0.13	0.19	2.02	2.57	1.64
gene8261	SPTLC3	serine palmitoyltransferase, long chain base subunit 3, transcript variant X6	4.25	0.04	5.47	0.1	0.05	0.28	3.55	1.77	3.06
gene828	GPR65	G protein-coupled receptor 65, transcript variant X3	16.6	12.63	7.96	1.18	2.25	3.21	8.45	12.37	23.67
gene8304	XPO1	exportin 1, transcript variant X2	89.25	76.27	79.57	24.2	30.69	36.42	116.34	83.77	126.33
gene8307	AHSA2	AHA1, activator of heat shock 90kDa protein ATPase homolog 2 (yeast)	10.64	7.79	8.96	3.39	3.8	4.69	10.33	9.22	11.57
gene8314	BCL11A	B-cell CLL/lymphoma 11A (zinc finger protein), transcript variant X1	5.82	4.04	5.35	1.07	0.63	0.72	1.6	2.18	9.36
gene8315	LOC106036650	uncharacterized LOC106036650, transcript variant X1	3.07	0.74	3.5	0.21	0	0.52	1.69	1.53	1.47
gene8331	MRPS25	mitochondrial ribosomal protein S25	85.61	89.52	105.53	29.46	33.9	41.23	96.97	100.16	56.83
gene8424	SLC4A11	solute carrier family 4, sodium borate transporter, member 11, transcript variant X1	53.58	53.72	59.06	9.19	12.8	25.42	26.64	24.59	97.31
gene8447	IBA57	IBA57 homolog, iron-sulfur cluster assembly	27.69	25.05	24.86	9.22	10.29	19.48	26.81	31.23	38.35
gene8592	SLC5A8	solute carrier family 5 (sodium/monocarboxylate cotransporter), member 8	0.5	0.01	1.24	0.04	0	0.16	0.82	0.32	0.7
gene8595	UTP20	UTP20, small subunit (SSU) processome component, homolog (yeast)	12.28	9.28	8.24	2.97	3.69	8.22	7.09	13.42	10.94
gene86	KIF11	kinesin family member 11, transcript variant X1	18.89	18.22	17.7	3.52	3.17	3.23	9.92	6.98	23.57
gene8613	CHODL	chondrolectin	6.53	3.16	6.91	0.08	2.7	2.14	4.81	11.31	3.92
gene863	B4GALT3	UDP-Gal:betaGlcNAc beta 1,4- galactosyltransferase, polypeptide 3, transcript variant X1	8.64	8.31	8.47	2.97	3.12	5.25	4.39	7.16	7.38
gene8648	CCT8	chaperonin containing TCP1, subunit 8 (theta)	160.26	136.95	159.72	63.79	60.12	67.07	183.23	197.49	220.34
gene8681	TNFSF8	tumor necrosis factor (ligand) superfamily, member 8	2.06	1.28	0.97	0.62	0.28	0.18	1.18	0.91	2.69
gene8702	TUBB4B	tubulin, beta 4B class IVb	312.04	257.29	333.87	100.4	90.88	74.86	304.64	454.95	351.72
gene8728	GRIN1	glutamate receptor, ionotropic, N-methyl D-aspartate 1	4.11	0	4.32	0.05	0	0.12	2.36	3.82	0.5
gene8729	LRRC26	leucine rich repeat containing 26	9.76	0	16.4	0	0	0.08	4.23	7.82	4.92
gene8731	RNF208	ring finger protein 208	7.9	9.81	8.22	2.71	2.25	3.12	2.68	4.14	12.71
gene8744	TRAF2	TNF receptor-associated factor 2, transcript variant X1	87.77	75.44	69	17.14	18.86	28.3	65.03	68.82	87.31
gene8754	FUT7	fucosyltransferase 7 (alpha (1,3) fucosyltransferase), transcript variant X1	5.87	3.36	3.31	0.57	0.58	0.62	3.34	2.93	6.81
gene88	HHEX	hematopoietically expressed homeobox	64.83	47.24	48.16	25.64	32.77	23.34	51.88	63.97	64.55
gene8821	LOC106037195	uncharacterized LOC106037195	8.3	3.89	6.92	1.4	1.18	3.14	8.8	4.49	4.94
gene8830	ZBTB25	zinc finger and BTB domain containing 25, transcript variant X1	19.31	15.14	18.23	4.74	3.78	7.08	17.71	12.7	17.51
gene8845	GPR132	G protein-coupled receptor 132	6.22	5.6	3.31	0.17	1.05	0.82	1.7	3.69	10.63
gene8850	PLD4	phospholipase D family, member 4, transcript variant X1	22.7	19.13	21.15	3.24	3.97	5.14	10.43	7.23	26.82
gene887	QTRTD1	queuine tRNA-ribosyltransferase domain containing 1, transcript variant X1	33.6	26.29	28.44	7.08	9.67	19.35	19.88	20.54	22.83
gene8931	SKA1	spindle and kinetochore associated complex subunit 1, transcript variant X1	6.14	6.87	4.84	0.14	0.14	0.4	1.32	1.92	7.66
gene8965	NOX1	NADPH oxidase 1	0.76	0.6	1.14	0	0.04	0.11	0.33	0.46	1.21
gene8966	XKRX	XK, Kell blood group complex subunit-related, X-linked	3.26	2.83	6.59	0.34	1.52	1.48	2.42	1.21	6.7
gene8985	VGLL1	vestigial-like family member 1, transcript variant X1	5.56	0.28	5.32	0.63	0.55	0.32	3.89	2.65	4.31
gene9031	GDPD2	glycerophosphodiester phosphodiesterase domain containing 2	22.32	0	14.8	0	0.08	0	8.74	20.7	6.39
gene9042	IL2RG	interleukin 2 receptor, gamma	44.88	43.71	33.29	11.11	17.29	13.07	21.69	33.54	66.16
gene9063	VWDE	von Willebrand factor D and EGF domains, transcript variant X1	0.35	0.66	0.1	0	0.04	0	0.04	0.15	0.03
gene9078	GLCCI1	glucocorticoid induced 1, transcript variant X1	50.35	32.08	41.18	10.87	17.81	19.25	50.96	28.95	51.12
gene9091	DLX5	distal-less homeobox 5	3.35	0.84	5.66	0.8	0.22	0.75	2.11	5.66	1.2
gene9162	LOC106037565	desmocollin-2-like	23.54	0.03	28.82	0.06	0	0.7	19.45	38.29	14.46
gene9163	LOC106037566	desmoglein-4-like	25.46	0.01	29.07	0.1	0.04	0.92	23.38	48.49	14.31
gene9164	DSG2	desmoglein 2, transcript variant X1	3.93	0.36	2.99	0.07	0.3	0.24	2.89	8.89	1.69
gene9174	ERCC6L	excision repair cross-complementation group 6-like	3.8	4.04	2.72	0.46	0.26	0.22	1.91	2.05	3.87
gene9177	SASH3	SAM and SH3 domain containing 3, transcript variant X1	59.43	54.2	37.35	8.82	10.4	12.91	21.33	23.12	63.54
gene9181	BCORL1	BCL6 corepressor-like 1	4.96	4.71	3.9	1.63	1.88	2.47	4.8	7.57	5.88
gene9199	SOWAHD	sosondowah ankyrin repeat domain family member D	31.48	24.19	25.03	8.29	6.49	6.9	14.4	10.6	35.17
gene9200	45175	septin 6, transcript variant X1	115.27	100.89	89.51	37.84	45.49	41.47	58.69	59.73	134.44
gene9209	LONRF3	LON peptidase N-terminal domain and ring finger 3	73.24	27.5	35.01	19.23	24.18	20.64	50.78	72.01	40.88
gene9285	FRMPD3	FERM and PDZ domain containing 3, transcript variant X1	1.03	0.06	1.03	0	0.04	0.04	1.63	2.59	0.34
gene9289	PLP1	proteolipid protein 1	3.4	2.87	3	0.67	1.11	2.48	2.46	6.79	3.03
gene9293	BTK	Bruton agammaglobulinemia tyrosine kinase	35.36	28.76	29.47	11.45	12.63	12.7	18.07	16.64	47.7
gene9299	CENPI	centromere protein I, transcript variant X2	5.45	4.85	5.03	1.7	1.73	1.61	2.57	3.26	6.05
gene9301	TRMT2B	tRNA methyltransferase 2 homolog B (S. cerevisiae), transcript variant X1	3.34	4.26	3.59	0.69	1.43	1.51	2.14	1.66	3.67
gene9302	LOC106037716	probable G-protein coupled receptor 34, transcript variant X1	2.91	1.83	1.9	0.21	0.2	0.17	1.21	0.71	3.92
gene9335	S100G	S100 calcium binding protein G	357.28	0	771.49	1.77	0.14	14.01	440.58	355.31	178.68
gene9357	MAP7D2	MAP7 domain containing 2, transcript variant X1	3.73	0.02	5.49	0.18	0.2	0.26	5.22	5.24	3.88
gene9378	SAT1	spermidine/spermine N1-acetyltransferase 1	1057.26	606.47	905.38	131.85	177.87	280.92	1406.48	966.94	890.35
gene9401	RSRP1	arginine/serine-rich protein 1, transcript variant X1	140.97	80.99	123.34	11.06	25.42	36.78	108.98	75.8	115.52
gene9404	RUNX3	runt-related transcription factor 3	16.49	15.68	16.31	2.99	2.86	2.69	5.84	7.19	28.79
gene9408	NCMAP	noncompact myelin associated protein, transcript variant X1	2.22	1.05	3.87	0.26	0.25	0.19	2.35	2.62	1.77
gene9413	GRHL3	grainyhead-like 3 (Drosophila), transcript variant X2	0.46	0.03	1.18	0.07	0	0.04	1.65	1.93	0.45
gene9414	IFNLR1	interferon, lambda receptor 1	2.47	1.43	3.08	0.12	0.2	0.15	1.23	1.59	0.97
gene9415	IL22RA1	interleukin 22 receptor, alpha 1	5.89	0.26	6.23	0.26	0.08	0.56	4.56	6.15	3.44
gene9419	PNRC2	proline-rich nuclear receptor coactivator 2	83.06	69.81	79.21	27.3	31.27	37.65	88.97	91.18	84.53
gene9433	LOC106037880	protein FAM49B-like	10.21	8.11	6.41	1.9	1.13	1.22	5.48	5.27	7.57
gene9454	LOC106037965	zinc finger and BTB domain-containing protein 8A-like	18.18	16.01	21.92	6.49	10.9	9.54	16.19	26.7	22.69
gene9468	LCK	LCK proto-oncogene, Src family tyrosine kinase	19.09	20.99	10.48	0.68	3.47	3.23	5.14	4.94	26.91
gene9470	MARCKSL1	MARCKS-like 1	143.96	159.91	140.52	35.74	33.61	28.49	109.97	146.5	161.35
gene9490	LOC106037937	gap junction beta-5 protein-like	3.61	0.11	3.2	0.12	0.23	0.44	3.68	7.84	1.5
gene9491	GJB3	gap junction protein, beta 3, 31kDa, transcript variant X1	19.2	0.07	11.57	0.13	0.54	0.26	15.86	52.03	5.94
gene95	CEP55	centrosomal protein 55kDa	5.06	4.76	3.95	0.91	0.47	0.2	3.25	2.54	7.04
gene9507	LOC106037928	protein argonaute-4	17.87	12.48	11.02	3.09	4.6	9.35	10.81	13.64	18.61
gene9508	LOC106037927	protein argonaute-1, transcript variant X1	12.38	9.9	9.7	3.49	5.48	8.41	10.19	16.51	13.14
gene9529	SNIP1	Smad nuclear interacting protein 1	22.66	19.27	21.75	11.14	8.17	11.97	22.85	28.34	20.39
gene9535	CDCA8	cell division cycle associated 8	20.4	17.86	21.55	1.42	1.05	1.14	11.68	10.13	22.06
gene9536	EPHA10	EPH receptor A10, transcript variant X2	0.64	0.29	0.4	0.03	0.29	0.09	0.33	0.27	0.18
gene9552	STMN1	stathmin 1	176.95	237.56	256.21	41.51	28.76	32.99	146.28	133.56	152.74
gene9572	DNASE1L3	deoxyribonuclease I-like 3, transcript variant X2	6.69	12.65	3.94	1.59	1.14	2.72	4.2	3.6	14.79
gene9578	COL7A1	collagen, type VII, alpha 1	42.08	9.22	18.32	0.96	0.46	0.49	22.06	28.35	17.84
gene9605	MCM2	minichromosome maintenance complex component 2	25.46	22.01	20.46	7.56	10.62	11.55	8.45	14.62	25.01
gene9625	LOC106038164	serine/threonine-protein kinase PDIK1L-like, transcript variant X2	1.86	2.45	2.91	0.41	0.16	0.24	1.03	2.15	4.21
gene9649	BLK	BLK proto-oncogene, Src family tyrosine kinase, transcript variant X2	23.2	17.86	12.14	4.5	6.14	4.13	4.59	6.76	18.36
gene966	NXPE3	neurexophilin and PC-esterase domain family, member 3, transcript variant X1	5.84	4.18	3.71	0.89	1.53	2.8	3.33	3.53	4.51
gene9668	LOC106038139	antimicrobial peptide THP2-like	8.37	18.87	20.94	0	0	0.39	10.25	9.8	3.87
gene9675	MCM3	minichromosome maintenance complex component 3	9.98	11.56	10.29	1.46	0.92	0.78	6.37	6.14	16.22
gene9706	ENPP4	ectonucleotide pyrophosphatase/phosphodiesterase 4 (putative)	21.2	13.76	17.81	3.9	3.38	4.87	7.78	8.97	27.72
gene9713	PLA2G7	phospholipase A2, group VII (platelet-activating factor acetylhydrolase, plasma)	36.54	25.92	30.81	8	10.15	12.76	20.18	17.32	33.3
gene9732	LOC106038256	lymphoid-restricted membrane protein-like, transcript variant X1	17.92	15.25	18.24	0.67	1.75	2.29	4.65	6.56	21.68
gene9754	A4GALT	alpha 1,4-galactosyltransferase, transcript variant X2	29.97	26.01	19.86	8.76	13.63	8.22	23.54	20.81	48.26
gene9759	LOC106038249	uncharacterized LOC106038249	10.22	5.6	10.11	2.22	2.86	5.48	8.65	6.74	8.71
gene9778	PRR5	proline rich 5 (renal), transcript variant X2	5.31	3.08	4.84	2.53	2.06	1.6	5.02	2.37	6.84
gene9824	PQLC1	PQ loop repeat containing 1	45.87	35.05	30	17.37	18.57	25.18	43.39	55.36	38.82
gene9825	HSBP1L1	heat shock factor binding protein 1-like 1	15.37	8.17	14.48	3.32	4.09	4.14	10.09	11.35	8.75
gene9830	RBFA	ribosome binding factor A (putative)	23.4	20.82	38.61	6.77	17.85	10.04	32.17	29.82	21.15
gene9846	KIF15	kinesin family member 15	8.77	8.38	7.87	1.04	0.92	1.22	4.44	4.69	12.14
gene9861	SNRPD1	small nuclear ribonucleoprotein D1 polypeptide 16kDa	422.55	411.34	381.94	173.43	165.82	182.65	417.57	512.59	339.41
gene9866	CXCR6	chemokine (C-X-C motif) receptor 6	39.2	23.54	16.28	2.34	1.58	6.64	24.15	18.39	18.19
gene9867	XCR1	chemokine (C motif) receptor 1	14.41	7.34	3.99	0.04	0.07	1.3	4.79	1.29	17.2
gene9869	LOC106038356	C-C chemokine receptor type 5-like, transcript variant X1	37.71	25	17.98	6.93	8.31	13.04	22.31	28.71	20.49
gene9870	LOC106038357	C-C chemokine receptor type 5-like, transcript variant X2	23.31	21.5	13.14	3.34	4.19	6.26	11.02	11.86	20.22
gene9871	TOPBP1	topoisomerase (DNA) II binding protein 1, transcript variant X1	14.85	12.28	8.96	3.37	3.66	5.73	10.01	11.73	13.17
gene988	HHLA2	HERV-H LTR-associating 2, transcript variant X1	0.92	0	1.93	0	0.17	0	1.33	0.83	0.71
gene9889	LOC106038418	ras-related protein Rab-10-like	43.72	44.12	27.56	13.4	18.04	17.3	28.56	19.66	53.96
gene989	MYH15	myosin, heavy chain 15	0.61	0.04	0.85	0.1	0.11	0.18	0.75	0.4	0.43
gene990	KIAA1524	KIAA1524 ortholog	2.76	2.17	2.74	0.49	0.36	0.38	2.18	2.28	3.9
gene9911	MCM4	minichromosome maintenance complex component 4	25	27.09	25.85	5.52	7.78	8.55	12.52	11.59	24.21
gene992	LOC106039194	T-cell receptor-associated transmembrane adapter 1	26.32	29.06	15.26	1.14	2.35	3.43	8.77	4.28	33.4
gene993	LOC106039182	uncharacterized LOC106039182, transcript variant X1	5.24	4.4	4.73	0.49	0.25	0.5	3	1.89	6.56
gene9937	RGS20	regulator of G-protein signaling 20	0.65	0.32	0.29	0.02	0	0.02	0.33	1.08	0.5
gene9938	TCEA1	transcription elongation factor A (SII), 1, transcript variant X1	43.16	60.66	49.44	17.77	26.35	25.81	53.44	40.18	48.55
gene9944	LOC106038467	uncharacterized LOC106038467, transcript variant X10	3.43	4.45	2.33	0.4	0.64	1.56	4.18	3.38	6.56
gene9972	WDYHV1	WDYHV motif containing 1	23.89	16.49	23.52	4.54	3.3	5.52	17.8	16.47	16.62
gene9975	LOC106038471	uncharacterized LOC106038471	3.82	3.69	6.54	0.75	0.91	1.28	3.15	1.86	1.61
gene9977	FAM83A	family with sequence similarity 83, member A, transcript variant X7	0.74	0.11	1.19	0.13	0.06	0.13	1.8	0.65	0.97
gene9987	MTBP	MDM2 binding protein	7.3	4.84	4.71	1.36	2.13	3.25	3.68	3.64	3.6
gene9997	MAL2	mal, T-cell differentiation protein 2	3.81	3.62	4.7	0.08	0.15	0.22	1.08	1.98	2.36

## Sheet: 4profile
Gene.id	symbol	Gene_description	D1201	D1202	D1203	D3001	D3002	D3003	D701	D702	D703
gene10002	SAMD12	sterile alpha motif domain containing 12	1.99	3.16	2.55	5.12	6.63	7.95	2.97	1.72	2.21
gene10062	COL4A6	collagen, type IV, alpha 6	11.42	11.17	10.73	12.42	21.39	32	6.01	11.81	13.58
gene1007	PHLDB2	pleckstrin homology-like domain, family B, member 2	19.66	25.69	14.79	37.89	43.8	53.32	18.36	19.98	13.1
gene10102	USP53	ubiquitin specific peptidase 53, transcript variant X1	17.1	13.41	14.29	24.61	53.44	31.61	15.84	8.91	14.46
gene10123	ANK2	ankyrin 2, neuronal, transcript variant X1	9.59	9.67	5.49	23.73	29.72	19.46	23.19	7.91	10.57
gene10124	LOC106038620	uncharacterized LOC106038620	0.04	0.03	0.04	0.31	0.67	0.07	0.12	0	0.04
gene10226	ITIH2	inter-alpha-trypsin inhibitor heavy chain 2	0	0.03	0.12	0.19	0.24	0.81	0.06	0.03	0.13
gene10243	LOC106038813	synaptotagmin-5-like	0.76	3.35	1.17	11.44	13.47	6.5	1.31	0.74	0.77
gene1034	LOC106039530	uncharacterized LOC106039530, transcript variant X1	0.03	0.29	0.1	1.67	1.12	0.27	0.71	0.09	0.06
gene1040	EPHA6	EPH receptor A6, transcript variant X1	0.48	1.19	0.9	2.27	4.3	2.7	0.55	0.69	0.6
gene10402	HTRA1	HtrA serine peptidase 1, transcript variant X1	540.43	826.92	696.51	1434.49	2004.8	1739.68	918.05	482.37	541.13
gene10440	DOCK1	dedicator of cytokinesis 1	19.01	19.24	15.76	35.4	38.7	33.41	14.59	22.79	16.36
gene1064	PTGFRN	prostaglandin F2 receptor inhibitor	14.52	22.71	15.98	65.93	46.69	38.59	27.19	16.43	20.44
gene1069	IGSF3	immunoglobulin superfamily, member 3	2.84	2.77	2.51	9.86	7.6	6.06	5.93	3.87	3.24
gene10693	LOC106039183	glypican-5-like, transcript variant X1	6.38	16.53	7.11	43.53	27.22	26.19	7.59	8.45	4.87
gene10875	CCDC18	coiled-coil domain containing 18, transcript variant X1	5.36	5.74	3.2	13.91	3.66	21.04	5.11	3.74	4.46
gene10940	LOC106039544	uncharacterized LOC106039544	0.88	0	0.18	5.42	7.33	3.36	0.07	0	0.46
gene10961	FNDC1	fibronectin type III domain containing 1, transcript variant X1	6.44	11.53	8.78	41.95	31.89	14.79	13	23.38	5.51
gene10990	NETO2	neuropilin (NRP) and tolloid (TLL)-like 2	1.94	4.38	2.66	11.97	5.34	5.96	4.36	3.44	1.36
gene11073	FZD1	frizzled class receptor 1	56.24	104.87	81.32	185.03	239	122.28	91.91	128.93	70.71
gene1108	GBE1	glucan (1,4-alpha-), branching enzyme 1, transcript variant X2	24.64	13.53	15.68	47.86	43.22	24.29	17.91	14.12	15.52
gene11094	CALCR	calcitonin receptor, transcript variant X1	0.89	4.54	2.45	10.31	9.46	5.51	2.73	1.99	0.78
gene11108	CLMP	CXADR-like membrane protein, transcript variant X6	16.71	11.53	12.57	32.57	41.55	38.74	16.87	19.15	13.77
gene11114	LOC106039708	uncharacterized LOC106039708	2.04	1.9	2.31	5.15	9.07	7.11	2.2	1.2	1.5
gene11132	THY1	Thy-1 cell surface antigen	121.57	280.83	131.6	224.55	355.89	363.72	95.52	205.53	135.4
gene11195	LOC106039827	FXYD domain-containing ion transport regulator 6-like, transcript variant X1	103.32	57.21	65.38	234.76	125.67	138.93	116.87	111.75	55.23
gene11205	LOC106039769	apolipoprotein A-I	387.01	316.91	969.39	2003.55	2531.35	1153.13	651.79	1125.62	438.77
gene11300	LOC106039939	uncharacterized LOC106039939	0	3.61	3.16	1.39	43.06	4.95	3.44	0	1.79
gene11340	SDPR	serum deprivation response	1009.07	741.06	853.28	1866.99	1775.48	1301.36	653.89	866.73	740.3
gene11341	TMEFF2	transmembrane protein with EGF-like and two follistatin-like domains 2	2.66	6.08	3.97	13.45	18.91	11.91	2.86	3.53	3.61
gene11379	SGOL2	shugoshin-like 2 (S. pombe)	0.11	0.07	0.11	0.2	0.56	0.54	0.09	0.15	0.06
gene11403	HRH1	histamine receptor H1, transcript variant X1	4.27	2.5	2.37	5.19	6.2	11.69	4.38	4.32	2.79
gene11407	SYN2	synapsin II	1.25	0.82	1.16	4.48	3.58	3.49	1.34	1.24	0.94
gene11408	TIMP4	TIMP metallopeptidase inhibitor 4, transcript variant X1	17.09	8.57	10.66	104.76	137.75	111.32	76.37	5.76	23.99
gene11426	IQSEC1	IQ motif and Sec7 domain 1, transcript variant X1	5.71	7.37	3.63	29.07	25.73	17.47	13.67	5.43	5.65
gene11494	LOC106040155	neuroblastoma suppressor of tumorigenicity 1	67.3	63.17	65.24	158.55	156.06	132.31	124.39	60.51	52.42
gene11513	LOC106040243	phospholipase A2, membrane associated-like, transcript variant X1	12.58	7.46	8.73	20.86	39.23	30.5	14.2	5.41	8
gene11532	PDPN	podoplanin, transcript variant X2	61.82	54.65	82.93	110.87	250.3	107.08	107.19	29	47.64
gene11556	DRAXIN	dorsal inhibitory axon guidance protein, transcript variant X8	5.38	12.21	5.71	55.69	7.53	21.96	4.29	15.43	5.66
gene11647	HS6ST1	heparan sulfate 6-O-sulfotransferase 1, transcript variant X1	16.75	11.74	13.95	30.21	34.96	24.8	16.4	14.75	16.34
gene1165	WISP2	WNT1 inducible signaling pathway protein 2	4.4	1.42	5.91	17.57	17.38	8.81	4.63	1.88	1.96
gene11690	SGCG	sarcoglycan, gamma (35kDa dystrophin-associated glycoprotein), transcript variant X2	4.04	5.4	6.78	12.49	21.49	11.59	6.03	2.77	2.71
gene11764	NRG1	neuregulin 1, transcript variant X3	0.25	0	0.42	1.42	1.5	1.49	0.12	0.86	0.44
gene11833	PNPLA4	patatin-like phospholipase domain containing 4, transcript variant X5	2.65	3.02	3.2	4.57	5.43	6.75	2.14	2.34	3.84
gene11855	WNT5A	wingless-type MMTV integration site family, member 5A	11.47	15.19	16.13	52.45	45.12	21.02	34.11	16.37	8.55
gene11906	APLP2	amyloid beta (A4) precursor-like protein 2, transcript variant X1	361.06	306.83	335.58	752.78	725.24	401.45	307.92	318.89	291.63
gene11973	NACC2	NACC family member 2, BEN and BTB (POZ) domain containing	6.57	6.61	5.6	11.36	16.91	10.86	6.82	10.1	4.84
gene11987	GSN	gelsolin, transcript variant X1	3496.58	7367.95	5870.02	21376.6	23383.1	10468.6	5273	4659.47	3203.27
gene11989	DAB2IP	DAB2 interacting protein	12.32	9.51	7.36	16.19	21.97	22.42	7.51	10.3	6.08
gene11998	LOC106040745	uncharacterized LOC106040745, transcript variant X1	0.32	0.22	0.23	0.82	0.67	0.88	0.35	0.29	0.17
gene12123	CDH4	cadherin 4, type 1, R-cadherin (retinal), transcript variant X1	5.27	4.01	4.01	13.28	16.7	12.24	3.43	7.45	6.01
gene12130	PHACTR3	phosphatase and actin regulator 3, transcript variant X1	0.27	0.38	0.48	1.73	1.55	2.92	0.24	1.68	0.12
gene12132	OVCH2	ovochymase 2, transcript variant X1	2.21	1.24	1.41	1.73	4.46	4.05	1.32	3.21	1.4
gene12140	TEAD1	TEA domain family member 1 (SV40 transcriptional enhancer factor)	11.27	10.33	8.29	15.92	25.14	23.82	12.32	10.57	11.17
gene1215	FAM65C	family with sequence similarity 65, member C, transcript variant X2	7.09	4.99	4.34	11.41	15.44	13.66	4.63	2.91	5.62
gene12282	LOC106041056	uncharacterized LOC106041056	0.66	0.23	0.17	2.25	3.46	5.96	0	0.83	0.2
gene1229	ATP9A	ATPase, class II, type 9A	1.34	1.29	0.86	2.64	3.13	2.41	0.73	1.35	1.78
gene12315	SBDS	Shwachman-Bodian-Diamond syndrome	87.3	96	79.44	159.17	180.41	164.91	69.32	102.2	77.98
gene12317	CALN1	calneuron 1, transcript variant X1	0.28	0.88	0.43	2.48	1.62	2.33	0.24	0.28	0.48
gene12319	WBSCR17	Williams-Beuren syndrome chromosome region 17, transcript variant X1	16.85	19.94	20.34	44.8	52.19	32.26	40.99	21.58	13.71
gene12347	GPR12	G protein-coupled receptor 12	0.03	0.02	0	0.16	0.04	0.68	0.07	0	0
gene1239	TSHZ2	teashirt zinc finger homeobox 2, transcript variant X1	4.42	5.01	2.66	7.41	11.85	7.43	3.2	4.17	6.45
gene12443	LOC106041217	uncharacterized LOC106041217	1.85	1.91	1.74	3.8	7.8	13.84	2	2.64	2.07
gene12444	LOC106041177	uncharacterized LOC106041177	0.46	0.54	0.24	1.44	2.65	2.96	0.33	0.61	0.41
gene12454	MKL2	MKL/myocardin-like 2, transcript variant X1	22.61	18.88	12.67	24.86	41.12	39.68	11.94	14.36	18.19
gene12538	CD34	CD34 molecule	36.74	67.21	57.7	116.99	125.17	99.27	73.45	75.11	35.94
gene12581	TMCC2	transmembrane and coiled-coil domain family 2	19.83	31.17	16.17	43.08	38.62	46.06	16.66	16.25	24.75
gene12585	CNTN2	contactin 2 (axonal)	1.87	0.9	1.55	7.39	17.57	2.41	0.57	3.45	0.69
gene12597	RTN4RL1	reticulon 4 receptor-like 1	5.64	2	4.4	13.07	14.08	7.11	2.53	3.66	3.09
gene12691	CAMKK1	calcium/calmodulin-dependent protein kinase kinase 1, alpha, transcript variant X4	4.1	10.27	3.95	15.53	20.29	13.64	12.23	1.96	1.97
gene12723	ALX1	ALX homeobox 1	1.47	1.98	2.31	6.27	5.73	7.27	2.89	0.31	1.74
gene12732	CFH	complement factor H	30.38	16.44	28.23	68.66	184.08	137.79	44.12	6.75	46.03
gene12752	RGS5	regulator of G-protein signaling 5	64.08	68.66	33.65	77.02	122.65	188.17	24.24	43.11	121
gene12757	OLFML2B	olfactomedin-like 2B	47.91	52.14	42.56	163.1	201.08	83.46	86.79	107.67	49.38
gene12767	CRIP1	cysteine-rich protein 1 (intestinal)	3377.71	2853.03	3340.42	7658.03	8870.8	5169.28	5370.3	3919.23	2476.1
gene12773	NOTCH2	notch 2	60.63	38.4	37.62	101.63	106.61	96.6	31.42	65.12	71.18
gene12795	DNM3	dynamin 3, transcript variant X1	10.56	6.59	8.73	21.04	24.12	20	9.75	6.54	4.42
gene12800	MYOC	myocilin, trabecular meshwork inducible glucocorticoid response	8.15	11.11	7.68	48.84	102.93	16.38	20.33	4.53	9.02
gene12896	JARID2	jumonji, AT rich interactive domain 2, transcript variant X1	15.31	9.43	8.28	14.69	40.94	29.22	5.83	13.55	17.68
gene12906	CAP2	CAP, adenylate cyclase-associated protein, 2 (yeast)	3.2	6.1	4.34	6.57	6.74	28.14	4.09	2.45	3.78
gene1292	APCDD1L	adenomatosis polyposis coli down-regulated 1-like	23.21	36.06	24.49	69.74	91.74	58.57	48.07	24.87	12.35
gene13001	SUSD5	sushi domain containing 5	0.43	0.46	0.87	2.45	1.17	0.92	0.72	1	0.26
gene13043	LOC106041875	uncharacterized LOC106041875, transcript variant X1	0.85	0.58	1.17	3.71	4.28	1.26	0.99	0.56	0.48
gene13052	LOC106041857	uncharacterized LOC106041857, transcript variant X2	0.25	0.66	0.25	1.26	1.25	2	0.28	0.28	0.7
gene13058	PKD2	polycystic kidney disease 2 (autosomal dominant), transcript variant X4	31.14	21.68	25.48	64.08	92.24	56.78	23.95	19.24	28.44
gene13103	NTNG1	netrin G1, transcript variant X7	3.29	2.03	2.94	6.9	8.08	2.94	4.33	2.15	2.6
gene13160	LAMB1	laminin, beta 1	67.02	72.08	75.15	136.78	139.64	102.35	42.34	80.88	56.56
gene13196	FOXP2	forkhead box P2	0.95	1.92	1.3	3.58	5.58	5.61	1.77	1.17	1.39
gene13235	CMYA5	cardiomyopathy associated 5	1.23	0.83	1.17	1.63	1.71	3.39	1.16	1.36	0.88
gene13244	LOC106042091	-	0	0.16	0	3.29	3.25	1.03	0	0	0.53
gene13281	TSPAN7	tetraspanin 7, transcript variant X2	10.08	7.29	15.1	22.11	37.35	13.69	10.17	9.23	6.88
gene13298	LOC106042166	dystrophin-like, transcript variant X1	1.16	1.03	0.16	2.31	4.53	3.13	1.3	2.2	1.33
gene13411	SPTBN1	spectrin, beta, non-erythrocytic 1, transcript variant X1	99.16	147.84	78.08	220.34	269.17	229	94.52	79.06	116.56
gene13447	DACH1	dachshund family transcription factor 1	1.53	2.54	2.26	2.89	3.8	23.27	1.1	1.62	7.54
gene13528	ACER3	alkaline ceramidase 3, transcript variant X1	17.81	12.84	12.48	34.55	40.88	35.12	12.12	11.37	15.35
gene13549	FAT4	FAT atypical cadherin 4	16.28	14.41	14.26	32.27	33.95	29.37	10.93	15.72	13.68
gene13562	FGF2	fibroblast growth factor 2 (basic), transcript variant X2	2.9	3.41	3.85	16.55	6.01	9.51	5.41	4.24	2.69
gene13573	BBS7	Bardet-Biedl syndrome 7	6.34	4.8	8.52	17.8	26.99	22.03	7.62	7.25	4.83
gene13577	QRFPR	pyroglutamylated RFamide peptide receptor	0.42	1.33	0.75	3.46	2.5	1.77	1.58	0.75	0.28
gene13579	BRINP3	bone morphogenetic protein/retinoic acid inducible neural-specific 3, transcript variant X1	0.07	0.48	0.04	1.34	2.93	2.19	0.19	0.13	0
gene13622	ANGPTL1	angiopoietin-like 1	23.46	22.38	34.44	90.25	63.52	77.26	47.64	32.09	23.36
gene13646	LOC106042564	uncharacterized LOC106042564	1.7	0.39	0.49	2.83	3.96	0.86	0.98	1.27	1.11
gene1366	SPTBN5	spectrin, beta, non-erythrocytic 5	1.3	4.03	2.12	4.55	18.14	14.72	1.74	1.32	1.34
gene13665	LOC106042544	protein WWC3-like	30.21	22.39	17.76	50.26	59.37	48.49	15.42	33.22	33.43
gene13689	PTPN5	protein tyrosine phosphatase, non-receptor type 5 (striatum-enriched), transcript variant X7	0.46	0.65	0.45	0.86	1.19	2.07	1.08	0.74	0.64
gene13716	LOC106042622	uncharacterized LOC106042622, transcript variant X1	0.97	1.4	0.68	2.47	2.33	3.24	0.52	1.45	0.22
gene13751	ZEB1	zinc finger E-box binding homeobox 1, transcript variant X1	20.71	33.31	18.21	51.22	58.66	56.02	25.26	18.73	19.07
gene13777	MKX	mohawk homeobox	0.54	2.26	1.01	6.23	4.19	4.88	2.28	0.38	0.19
gene13784	ACBD5	acyl-CoA binding domain containing 5, transcript variant X1	74.67	45.13	51.01	164.59	240.03	116.81	39.24	31.26	64.63
gene13850	SH3PXD2B	SH3 and PX domains 2B, transcript variant X1	22.77	26.59	22.73	41.84	55.35	47.91	19.23	21.09	20.33
gene13863	LOC106042779	neuron-specific protein family member 2	5	3.41	2.9	8.04	3.61	12.9	2.48	3.73	2.94
gene13928	LOC106042805	semaphorin-3B-like	6.86	14.85	10.81	32.33	31.12	21.24	16.03	21.08	8.35
gene13967	INHBA	inhibin, beta A, transcript variant X2	0.6	0.6	1.37	3.45	2.49	2.21	2.07	1.38	1.07
gene14034	EDA	ectodysplasin A	6.59	6.36	7.72	15.78	19.06	8.01	10.29	6.58	6.76
gene14052	LPAR4	lysophosphatidic acid receptor 4	18.27	18.69	19.35	65.24	67.36	48.38	13.13	16.04	12.91
gene14058	TBX22	T-box 22	21.24	13.86	37.44	100.41	71.78	40.72	83.95	21.19	8.01
gene14116	SVEP1	sushi, von Willebrand factor type A, EGF and pentraxin domain containing 1	20.38	29.54	20.09	62.5	49.17	54.78	27.91	12.65	24.01
gene14118	LPAR1	lysophosphatidic acid receptor 1, transcript variant X1	4.92	13.13	6.7	19.47	17.41	13.19	10.95	7.1	5.13
gene14141	B3GNT9	UDP-GlcNAc:betaGal beta-1,3-N-acetylglucosaminyltransferase 9, transcript variant X1	18.64	16.4	20.04	64.09	57.95	51.93	30.76	11.34	10.28
gene14183	MMP2	matrix metallopeptidase 2	263.54	315.36	311.44	1185.12	1302.73	989.67	682.03	378.67	334.2
gene14237	EXOC6B	exocyst complex component 6B, transcript variant X1	6.62	9.07	6.33	17.07	15.12	12.69	9.33	9.68	7.59
gene14255	CPXM1	carboxypeptidase X (M14 family), member 1	54.64	104.61	66.79	232.14	163.93	205.5	82.15	89.76	55.56
gene14276	NBEA	neurobeachin	3.12	4.06	3.53	17.97	18.03	21.66	4.13	3.32	2.23
gene14280	DCLK1	doublecortin-like kinase 1, transcript variant X2	1.93	9.27	2.15	25.05	13.74	9.69	11.85	2.87	3.76
gene14283	CCDC169	coiled-coil domain containing 169, transcript variant X1	0.09	0.13	0.1	0.67	1.15	1.36	0.43	0.16	0.09
gene1430	PACSIN3	protein kinase C and casein kinase substrate in neurons 3	50.5	20.86	51	150.57	106.54	53.57	79.54	42.35	34.23
gene14322	WISP1	WNT1 inducible signaling pathway protein 1	38.39	89.27	71.3	135.54	137.4	221.55	93.23	35.59	37.32
gene14345	GK	glycerol kinase, transcript variant X1	44.82	18.44	17.91	39.08	81.48	42.51	15.45	31.25	37.46
gene14361	TRIM71	tripartite motif containing 71, E3 ubiquitin protein ligase	0.4	0.25	0.16	0.42	0.7	0.77	0.18	0.15	0.7
gene1447	FAM180B	family with sequence similarity 180, member B	2.51	12.92	3.73	22.49	25.03	9.36	14.18	3.72	3.2
gene14479	HUNK	hormonally up-regulated Neu-associated kinase	2.22	5.55	2.49	13.14	7.89	6.6	5.64	3.08	2.62
gene14622	LRRC7	leucine rich repeat containing 7, transcript variant X1	0.34	0.55	0.15	2.49	1.92	1.28	0.49	0.39	0.31
gene1463	ALX4	ALX homeobox 4	1.2	0.8	1.8	2.65	5.07	4.26	1.86	1.87	1.21
gene14630	NEGR1	neuronal growth regulator 1	3.29	3.13	5.2	8.16	12.22	7.39	7.62	6.62	2.97
gene14658	UACA	uveal autoantigen with coiled-coil domains and ankyrin repeats, transcript variant X1	7.57	8.17	6.9	17.01	19.58	15.43	7.42	8.82	7.24
gene14669	CORO2B	coronin, actin binding protein, 2B	8.81	10.79	7.76	26.82	19.62	16.51	14.04	15.89	3.41
gene14670	ITGA11	integrin, alpha 11	5.56	9.92	3.47	26.31	44.8	28.89	9.91	7.95	5.35
gene14716	ARSK	arylsulfatase family, member K	39.49	49.39	37.13	81.26	92.59	77.59	47.09	35.99	35.55
gene14753	NUDT12	nudix (nucleoside diphosphate linked moiety X)-type motif 12, transcript variant X1	1.99	1.8	2.06	4.63	4.74	5.95	1.3	2.3	0.81
gene14759	PAM	peptidylglycine alpha-amidating monooxygenase, transcript variant X1	17.88	25.25	21.17	53.12	47.43	60.02	40.09	33.55	17.84
gene14786	LOC106043756	coiled-coil domain-containing protein 92	5.87	0.73	2.88	20.77	11.18	4.2	2.35	0.1	4.29
gene14887	ACVR1C	activin A receptor, type IC	3.47	4.19	10.46	3.88	26.44	31.48	2.55	1.61	10.73
gene15079	NTNG2	netrin G2, transcript variant X1	2.53	4.88	2.78	8.02	11.03	6.08	2.51	2.41	2.68
gene15095	GBGT1	globoside alpha-1,3-N-acetylgalactosaminyltransferase 1, transcript variant X2	6.42	7.92	7.47	11.27	13.24	14.02	5.03	5.29	8.46
gene15129	LOC106044089	uncharacterized LOC106044089	10.53	9.6	12.34	26.47	21.19	19.6	11.34	11.85	2.05
gene15167	LINGO1	leucine rich repeat and Ig domain containing 1	20.07	16.66	18.91	38.9	25.82	55.78	23.65	25.58	12
gene15208	LOXL1	lysyl oxidase-like 1	45.77	49.57	71.32	199.82	129.77	78.65	127.75	65.49	43.44
gene15312	SFRP4	secreted frizzled-related protein 4	1.77	3.54	4	19.26	29.38	4.81	10.35	1.51	0.68
gene15313	EPDR1	ependymin related 1	11.69	2.21	6.38	26.48	31.27	11.55	9.54	3.6	7.84
gene15320	PHACTR1	phosphatase and actin regulator 1, transcript variant X2	2.46	2.52	2.31	10.88	7.36	8.73	2.08	1.58	1.08
gene15343	ANK1	ankyrin 1, erythrocytic, transcript variant X2	8.64	4.1	4.9	19.56	25.69	39.99	2.97	7.34	8.95
gene15354	LOC106044415	disintegrin and metalloproteinase domain-containing protein 32-like	4.62	1.87	1.43	3.24	5.2	7.77	1.84	3.53	5.82
gene15445	LOC106044490	kelch-like protein 29	0.24	0.11	0.12	0.79	1.38	1.1	0.27	0	0.55
gene15478	FAM3C	family with sequence similarity 3, member C	114.17	153.98	139	280.95	277.38	209.89	143.91	123.62	111.78
gene15491	LOC106044537	neurexin-3-beta, transcript variant X1	0.2	0.2	0.19	1.19	0.8	0.24	0.1	0.29	0.29
gene1553	LOC106045089	uncharacterized LOC106045089	4.37	7.22	4.46	8.64	18.93	12.97	7.53	5.89	5.83
gene15550	MXRA8	matrix-remodelling associated 8, transcript variant X2	32.64	29.95	48.37	70.41	102.98	72.16	47.25	27.59	25.39
gene15575	SKI	SKI proto-oncogene	15.08	18.65	10.82	73.8	83.65	39.91	30.19	26.55	27.56
gene15592	PRDM16	PR domain containing 16, transcript variant X1	1.63	0.82	1.08	1.94	4.29	3.96	0.48	1.32	0.93
gene1560	ART4	ADP-ribosyltransferase 4 (Dombrock blood group)	0.27	0.66	0.23	1.34	1.57	1.65	0.52	0.22	0.61
gene1562	SMCO3	single-pass membrane protein with coiled-coil domains 3, transcript variant X1	0.66	3.03	0.89	8.11	3.46	4.68	4.21	0.71	1.34
gene15635	MEIS1	Meis homeobox 1, transcript variant X1	47.97	35.68	60.92	87.81	110.17	85.62	44.72	40.42	32.4
gene1565	LOC106045810	histone H1.10	7.02	7.87	10.88	28.08	32.5	16.77	10.92	7.08	7.08
gene1566	LOC106045814	histone H2B 7-like	9.14	6.9	7.37	43.21	40.54	30.51	7.99	5.55	7.92
gene15680	SYNDIG1	synapse differentiation inducing 1, transcript variant X1	6.1	13.35	21.55	26.95	44.94	45.02	19.12	10.06	6.8
gene1569	LOC106045823	histone H2A-like	20.26	12.73	33.55	108.82	93.22	41.17	32.5	17.85	11.65
gene1571	LOC106045128	uncharacterized LOC106045128	14.01	10.64	17.15	55.02	54.78	26.83	8.01	14.67	9.09
gene1575	LOC106045840	histone H2A.J	3.96	1.97	4.06	7.16	14.4	14.96	4.03	3.36	3.95
gene15768	CDH13	cadherin 13	56.14	36.33	27.87	126.13	104.15	110.28	63.9	50.95	39.02
gene1578	LOC106045890	histone H4	60.27	49.1	10.54	161.46	93.45	48.31	51.05	62.81	53.45
gene15801	EFNB2	ephrin-B2	9.37	4.93	5.94	7.62	13.45	22.85	3.5	10.49	3.76
gene1582	LOC106045148	histone H2A-IV-like	4.36	2.78	7.76	28.22	31.19	20.55	3.58	2.84	8.16
gene1583	LOC106045096	histone H2B type 2-E-like	3.81	1.15	4.38	17.32	17.79	14.28	3.91	0.64	1.18
gene1585	LOC106045899	histone H1.10-like	5.18	3.53	4.16	14.79	8.01	6.58	4.66	2.76	3.15
gene15854	INSR	insulin receptor	0.53	0.75	0.51	2.57	2.95	1.54	0.72	1.56	0.88
gene15858	CPAMD8	C3 and PZP-like, alpha-2-macroglobulin domain containing 8	3.38	5.81	4.29	15.41	15.06	22.75	14.64	4.76	3.1
gene1587	LOC106045907	histone H2A-IV	71.62	39.39	86.52	206.31	151.69	92.82	72.25	66.31	30.04
gene15939	LOC106045020	poly(rC)-binding protein 3-like, transcript variant X1	2.92	1.15	2.99	6.95	6.64	3.69	2.07	0.79	3.82
gene15949	TMEM245	transmembrane protein 245, transcript variant X1	5.82	5.14	3.33	16.05	12.05	6.84	2.63	6.91	10.38
gene16031	TMEM200B	transmembrane protein 200B, transcript variant X1	5.72	5.25	3.12	14.41	10.96	7.03	10.56	5.49	4.21
gene16082	LOC106045189	uncharacterized family 31 glucosidase KIAA1161-like	4.79	5.48	4.09	13.43	11.09	11.75	4.72	5.71	3.81
gene16085	DNAI1	dynein, axonemal, intermediate chain 1	4.69	6.73	1.69	34.62	29.13	19.79	4.31	0.88	1.87
gene16183	PARD3	par-3 family cell polarity regulator, transcript variant X1	9.29	9.73	9.39	24.37	27.33	21.76	11.79	11.42	9.56
gene16239	LOC106045369	uncharacterized LOC106045369	1.01	1.57	1.88	17.14	9.62	1.77	3.83	1.6	0.81
gene16320	SOX5	SRY (sex determining region Y)-box 5	4.45	2.87	2.87	6.17	6.03	12.23	2.56	4.35	4.36
gene16327	PYROXD1	pyridine nucleotide-disulphide oxidoreductase domain 1	8.39	5.46	8.54	15.46	21.06	17.5	5.75	6.7	5.23
gene16349	PDE1C	phosphodiesterase 1C, calmodulin-dependent 70kDa, transcript variant X1	8.21	4.6	3.87	8.11	15.53	8.89	3.45	4.1	5.96
gene16393	AR	androgen receptor	34.92	43.93	34.75	79.93	129.36	91.24	63.39	32.01	40.44
gene16534	TBX15	T-box 15	9.13	11.87	4.12	37.6	40.61	20.4	5.84	6.27	5.38
gene1662	SYT1	synaptotagmin I, transcript variant X1	2.64	4.92	5.78	6.16	11.07	17.54	8.41	8.05	3.97
gene16693	TNS1	tensin 1	147.72	126.38	120.95	346.68	413.98	293.35	162.67	197.88	188.26
gene16702	IGFBP2	insulin-like growth factor binding protein 2, 36kDa, transcript variant X1	130.92	55.65	152.1	282.96	544.64	361.82	57.85	120.62	106.86
gene16734	LOC106045951	band 3 anion transport protein-like	6.14	2.04	3.28	10.54	17.89	21.08	1.69	5.17	6.32
gene16758	MRC2	mannose receptor, C type 2	38.67	90.17	41.38	184.47	177.6	134.83	80.87	48.34	45.76
gene16816	SCNN1B	sodium channel, non voltage gated 1 beta subunit	7.42	5.62	12.57	18.65	25.85	17.07	4.9	8.57	6.49
gene16964	FRMD4A	FERM domain containing 4A	8.72	10.09	7.08	16.76	20.5	25.09	5.93	13.73	10.95
gene1697	LGR5	leucine-rich repeat containing G protein-coupled receptor 5, transcript variant X1	4.63	7.94	4.02	21.21	14.91	32.58	4.46	7.08	5.06
gene16994	PRDM6	PR domain containing 6	0.13	0.16	0.1	0.74	2.25	0.89	0.07	0.09	0.04
gene17011	LOC106046260	transcription factor COE2, transcript variant X1	3.82	3.38	2.08	10.75	17.7	11.06	8.6	2.93	5.55
gene17073	LOC106046313	chromosome unknown open reading frame, human C16orf89, transcript variant X1	0.52	5.17	1.86	7.3	5.88	11.85	3.27	1.01	2.25
gene17090	IFT140	intraflagellar transport 140, transcript variant X1	7.39	5	4.83	11.88	12.69	7.1	5.4	4.93	5.2
gene17192	LOC106046449	uncharacterized LOC106046449, transcript variant X3	0.46	0.22	0.1	0.43	1.24	1.31	0.23	0.32	0.17
gene17235	CA5A	carbonic anhydrase VA, mitochondrial	8.4	7.25	5.34	26.85	35.26	25.25	12.89	9.85	13.09
gene17238	LOC106046504	uncharacterized LOC106046504	0.63	0.44	0.03	2.11	2.26	4.15	0.32	0.98	0.52
gene17240	ZNF469	zinc finger protein 469	3.22	6.35	1.86	8.88	9.6	14.61	2.47	5.65	2.74
gene17371	MTURN	maturin, neural progenitor differentiation regulator homolog (Xenopus)	2.88	1.96	2.61	4.78	5.19	6.88	2.15	2.18	1.91
gene17390	ACKR4	atypical chemokine receptor 4	24.15	9.82	11.7	81.26	28.27	17.68	13.43	10.23	7.94
gene174	LOC106049699	uncharacterized LOC106049699, transcript variant X1	1.76	0.88	0.72	1.98	2.31	3.22	0.81	1.54	1.04
gene17431	LOC106046714	uncharacterized LOC106046714	0.31	0.44	0.53	4.41	3.1	1.31	0.45	0.9	0.21
gene17442	SLC38A10	solute carrier family 38, member 10	97.95	88.85	77.72	232.68	163.49	142.94	87.27	86.53	84.71
gene17547	TBX2	T-box 2	4.68	2.76	5.27	7.68	12.57	15.37	2.93	11.35	2.64
gene17768	LOC106047050	NACHT, LRR and PYD domains-containing protein 3-like, transcript variant X1	12.84	7.68	7.74	13.81	33.27	16.26	10.24	8.41	6.03
gene17847	PLTP	phospholipid transfer protein	27.85	17.65	20.71	37.92	55.72	39.36	38.92	16.57	25.29
gene17870	LOC106047195	myosin heavy chain, skeletal muscle, adult-like	0.17	0.04	0.02	0.71	0.67	0.22	0.13	0.05	0
gene17890	CEP104	centrosomal protein 104kDa, transcript variant X2	13.41	13.56	11.05	30.88	29.49	19.72	12.45	12.86	13.87
gene17932	USP20	ubiquitin specific peptidase 20, transcript variant X3	31.65	32.53	28.17	47.96	68.05	53.52	27.3	21.95	26.71
gene1800	ANO6	anoctamin 6	50.39	33.95	44.31	162.36	166.09	138.53	64.72	58.78	37.87
gene18007	CDC14B	cell division cycle 14B, transcript variant X1	37.96	27.81	27.66	58.44	74.42	59.51	43.43	32.19	38.55
gene18037	WDR35	WD repeat domain 35	8.01	11.5	7.84	22.89	28.24	17.92	8.23	11.53	8.42
gene18062	FHOD3	formin homology 2 domain containing 3, transcript variant X1	2.44	3.62	1.21	6.67	4.68	8.6	2.61	3.11	2.39
gene1808	TWF1	twinfilin actin binding protein 1	4.68	4.35	3.85	8.64	12.15	10.11	4.87	5.02	3.82
gene18133	SCARF2	scavenger receptor class F, member 2, transcript variant X1	13.64	7.78	12.25	22.87	31.24	17.31	6.38	12.1	9.45
gene18248	OSTN	osteocrin, transcript variant X1	0.61	0.29	2.14	8.69	3.59	6.92	0	2.15	0.15
gene18290	ANTXR1	anthrax toxin receptor 1	8.62	19.42	8.43	38.9	39.27	43.45	15.26	5.78	11.35
gene183	PSD	pleckstrin and Sec7 domain containing	10.79	4.77	9.75	15.63	21.53	22.46	4.68	9.19	5.16
gene18301	PRNP	prion protein, transcript variant X1	214.95	119.82	187.14	345.33	277.44	274.2	100.04	222.62	124.87
gene18354	LIMA1	LIM domain and actin binding 1, transcript variant X1	51.02	63.25	51.62	96.48	130.84	100.37	60.65	40.46	32.79
gene18503	LVRN	laeverin	0.88	1.31	1.33	21.54	3.84	3.81	4.88	0.34	0.78
gene18552	TMEM59L	transmembrane protein 59-like	6.87	4.32	3.64	20.57	13.31	11.76	5.61	6.25	4.8
gene18555	COMP	cartilage oligomeric matrix protein, transcript variant X5	14.32	13.67	3.86	96.72	112.24	52.02	4.73	5.16	5.02
gene18579	CILP2	cartilage intermediate layer protein 2	0.16	0.53	0.43	3.16	10.37	2.6	0.15	0.18	0.56
gene18627	PTRF	polymerase I and transcript release factor	557.58	530.24	580.07	1288.86	1157.85	1011.92	496.56	616.77	398.18
gene18636	CNTNAP1	contactin associated protein 1	0.17	0.56	0.13	1.4	1.62	0.94	0.11	0.3	0.68
gene18659	PRSS23	protease, serine, 23, transcript variant X3	345.85	509.44	403.86	940.77	840.39	872.18	572.54	357.31	419.94
gene18686	MFAP5	microfibrillar associated protein 5, transcript variant X2	174.92	334.21	305.48	589.42	555.99	454.5	498.36	117.16	154.85
gene18698	LOC106048077	alpha-2-macroglobulin-like	25.56	22.45	25.45	53.24	110.79	68.26	18.99	29.05	44.14
gene18710	GAD2	glutamate decarboxylase 2 (pancreatic islets and brain, 65kDa), transcript variant X1	2.22	1.09	1.18	1.76	4.25	3.11	1.07	1.55	2.52
gene18754	LOC106048154	SH3 and multiple ankyrin repeat domains protein 3-like	2.76	4.18	2.15	3.89	6.11	12.04	2.27	3.44	2.9
gene18779	BNC2	basonuclin 2	1.92	3.42	3.28	9.01	10.55	7.55	3.25	2.54	2.42
gene18781	GRIN3B	glutamate receptor, ionotropic, N-methyl-D-aspartate 3B	1.32	5.04	3.63	6.14	10.42	3.48	5.61	5.45	1.56
gene18842	LOC106048257	spectrin beta chain, erythrocytic-like	3.8	1.62	6.16	5.27	10.9	11.23	2.01	4.97	3.91
gene18926	ADAMTSL1	ADAMTS-like 1, transcript variant X1	2.39	4.92	3.16	8.2	5.89	13.17	4.94	3.19	3.19
gene18950	LOC106048380	uncharacterized LOC106048380, transcript variant X2	0.53	0.13	0.51	1.37	1.5	1.41	0.42	0.51	0.09
gene18960	KIF3C	kinesin family member 3C	6.75	6.17	5.17	15.7	10.38	13.23	7.11	11.85	6.56
gene19023	PI16	peptidase inhibitor 16, transcript variant X1	42.84	80.54	88.79	193.75	366.87	262.69	81.66	47.6	47.12
gene19080	THBS3	thrombospondin 3	6.21	38.46	11.64	84.12	92.21	39.95	44.67	32.08	11.56
gene19132	LOC106048580	hemoglobin subunit beta	3916.22	1277.61	1602.39	5916.68	7961.68	7697.66	1309.23	3468.03	4173.29
gene19231	LOC106048669	uncharacterized LOC106048669	1.97	0.78	1.08	1.62	4.34	3.08	1.46	2.35	1.93
gene19283	RAMP3	receptor (G protein-coupled) activity modifying protein 3, transcript variant X1	14.07	9.24	17.58	20.43	38.12	42.16	9.11	17.44	10.95
gene19308	DAG1	dystroglycan 1 (dystrophin-associated glycoprotein 1)	66.98	46.41	53.47	122.16	122.12	105.42	39.96	72.72	54.51
gene19314	BSN	bassoon presynaptic cytomatrix protein	0.99	1.07	1.09	2.74	2.21	1.54	1.11	1.54	0.75
gene19356	GALNT2	polypeptide N-acetylgalactosaminyltransferase 2	10.96	8.97	6.38	21.19	31.74	20.61	11.1	11.63	11.78
gene19390	DOCK5	dedicator of cytokinesis 5, transcript variant X1	3.51	4.17	2.59	4.5	8.41	8.09	5.63	4.93	3.57
gene19454	ADD2	adducin 2 (beta)	1.87	1.99	0.81	2.27	3.26	4.31	0.75	1.56	2.49
gene19549	LRP1	low density lipoprotein receptor-related protein 1	48.77	88.76	51.46	227.34	292.89	165.87	105.56	104.58	102.6
gene19595	LHFP	lipoma HMGIC fusion partner	49.7	47.01	59.19	165.61	125.82	82.8	66.72	52.08	28.44
gene19598	NPAS2	neuronal PAS domain protein 2	7.46	4.79	8.98	17.91	14.23	28.14	4.89	5.31	6.68
gene19703	OGN	osteoglycin	92.74	414.72	185.98	1067.52	827.04	719.84	421.91	266.45	224.02
gene19705	ASPN	asporin	63.31	38.22	34.82	151.73	90.9	57.48	80.55	36.76	25.92
gene19789	CTSK	cathepsin K	359.2	586.59	447.75	1018	1475.42	890.48	457.42	285.16	297.96
gene1982	LTBP1	latent transforming growth factor beta binding protein 1, transcript variant X1	16.81	29.6	19.12	118.84	69.08	56.42	39.32	32.28	15.36
gene19854	UGGT2	UDP-glucose glycoprotein glucosyltransferase 2	9.2	12.07	8.03	18.47	16.01	26.36	11.99	8	7.81
gene19871	LOC106049351	DNA-directed RNA polymerase II subunit RPB1-like	0.73	2.88	1.84	8.29	9.45	10.89	5	1.85	1.64
gene19872	LOC106049352	soluble scavenger receptor cysteine-rich domain-containing protein SSC5D-like	0.64	9.22	3.27	12	11.92	10.9	3.71	3.77	3.67
gene19873	LOC106049353	collagen alpha-2(XI) chain-like	4.01	8.9	6.22	38.36	43.3	32.87	17.09	11.78	11.28
gene19955	SYDE1	synapse defective 1, Rho GTPase, homolog 1 (C. elegans)	10.9	9.44	10.22	22.79	30.46	20.7	10.67	18.17	14.66
gene19975	LOC106049466	protocadherin alpha-11-like	8.69	5.44	7.37	16.05	22.18	25.28	5.2	7.14	10.67
gene20019	SCARA3	scavenger receptor class A, member 3	12.1	18.82	15.19	29.17	47.65	46.03	24.13	23.75	24.38
gene20023	SCARA5	scavenger receptor class A, member 5	337.01	469.9	590.07	1345.39	1051.07	711.86	884.51	439.03	419.01
gene20064	MMRN1	multimerin 1	5.13	17.56	10.87	55.38	20.8	50.65	35.89	2.04	21.48
gene20121	LOC106049626	histone H2B 5	13.55	3.49	52.35	174.19	128.19	51.97	14.67	36.23	9.7
gene20127	LRRC4B	leucine rich repeat containing 4B	2.66	3.82	3.33	6.02	9.67	7.73	2.46	3.04	3.67
gene20140	LOC106049637	leucine-rich repeat and fibronectin type III domain-containing protein 1-like protein	5.49	5.36	8.91	12.29	14.47	16.43	14.96	6.26	3.25
gene20177	LOC106049672	zinc finger protein 280D-like	4.09	2.99	2.65	4.4	9.09	5.98	2.31	4.69	4.24
gene20183	ORMDL3	ORMDL sphingolipid biosynthesis regulator 3	7.76	6.54	2.11	27.83	29.36	22.79	2.55	5.06	8.17
gene20184	GSDMA	gasdermin A	21.09	14.32	18.58	38.47	43.17	28.68	19.49	19.86	15.5
gene20199	LOC106049710	uncharacterized LOC106049710, transcript variant X1	12.63	13.86	7.61	103.95	15.79	15.32	14.76	8.45	16.56
gene20205	LOXL2	lysyl oxidase-like 2, transcript variant X5	26.16	21.71	40.04	99.32	49.52	68.45	37.37	40.58	17.01
gene20254	LOC106049750	zinc finger protein 883-like	6.2	5.7	5.89	13.64	14.29	12.56	3.79	6.93	4.15
gene20279	LOC106049785	collagen alpha-1(XI) chain-like	29.77	12.67	21.69	47.78	37.22	54.05	12.74	29.04	15.94
gene20350	LOC106049863	protocadherin beta-5-like	10.03	10.25	14.73	54.97	45	14.31	6.65	14.9	18.55
gene20353	LOC106049866	protocadherin gamma-A3-like	33.26	38.41	27.44	135.94	166.17	97.34	44.34	39	28.17
gene20693	LOC106029557	uncharacterized LOC106029557	43.57	85.25	55.16	257.44	265.56	170.48	84.27	83.84	72.34
gene20694	LOC106029558	uncharacterized LOC106029558	221.77	535.84	269.15	1371.93	1548.15	1037.8	362.77	522.02	327.86
gene208	LOC106030078	CWF19-like protein 1, transcript variant X1	2.83	2.67	3.94	4.4	9.78	13.3	1.85	3.15	3.77
gene2082	LOC106029876	leucine-zipper-like transcriptional regulator 1, transcript variant X1	1.36	1.03	1.58	5.46	6.1	2.3	2.96	1.6	1.04
gene20823	LOC106029694	toll-like receptor 2 type-1	50.69	23.41	31.76	98.98	86.73	46.42	49.41	37.53	35.02
gene2087	GLI2	GLI family zinc finger 2	1.82	2.07	2.95	3.97	6.11	4.62	2.9	1.67	2.7
gene2129	GLB1L	galactosidase, beta 1-like	1.8	2.25	2.36	6.73	11.88	3.08	5.89	2.55	0.69
gene2159	FAP	fibroblast activation protein, alpha, transcript variant X1	36.44	72.52	37.54	111.3	115.2	101.72	103.26	37.12	32.85
gene2167	FIGN	fidgetin, transcript variant X1	0.29	0.22	0.16	0.35	0.46	0.65	0.2	0.15	0.24
gene2218	LOC106029992	cytochrome b reductase 1	55.91	46.9	52.88	93.76	147.13	92.79	92.05	37.87	57.24
gene2270	LOC106030024	uncharacterized LOC106030024	2.68	2.34	1.22	4.17	6.27	4.45	2.46	2.55	1.48
gene2317	PARD3B	par-3 family cell polarity regulator beta	20.18	18.2	15.72	60.93	50.05	41.86	26.15	19.34	18.55
gene2324	GPR1	G protein-coupled receptor 1, transcript variant X2	9.32	17.95	10.25	54.47	72.16	65.84	40.35	12.49	21.35
gene2327	ADAM23	ADAM metallopeptidase domain 23	5.01	2.6	3.36	4.1	10.93	8.98	4.74	3.36	5.4
gene2357	FZD7	frizzled class receptor 7	10.49	7.97	10.16	27.68	42.55	27.84	7.39	7.08	8.66
gene2361	TMEM237	transmembrane protein 237	3.28	1.7	2.98	4.56	5.2	5.3	2.56	2.12	1.9
gene2494	PP2D1	protein phosphatase 2C-like domain containing 1	1.09	0.24	0.7	1.37	2.55	1.64	0.64	1.17	0.52
gene2495	KAT2B	K(lysine) acetyltransferase 2B, transcript variant X1	46.39	19.72	36.49	105.67	108.85	58.21	27.3	26.38	22.58
gene2499	ZNF385D	zinc finger protein 385D, transcript variant X1	3	1.78	1.73	9.53	7.32	8.06	4.39	2.07	4.03
gene2505	LOC106030278	ubiquitin-conjugating enzyme E2 E2	39.91	24.75	32.91	58.87	66.07	47.4	33.64	23.12	23.84
gene2519	RARB	retinoic acid receptor, beta, transcript variant X6	10.46	14.12	10.87	35.8	66.92	40.27	15.4	9.63	8.36
gene2571	LOC106030345	macrophage mannose receptor 1-like, transcript variant X1	13.72	9.36	7.19	9.68	15.28	61.94	9.03	8.25	13.57
gene2573	LOC106030347	macrophage mannose receptor 1-like	23.93	11.47	5.29	19.93	16.41	41.14	15.19	7.8	12.6
gene2585	MYO6	myosin VI, transcript variant X1	11.16	6.75	8.88	21.42	20.09	16.93	7.36	9.58	7.32
gene2590	COL12A1	collagen, type XII, alpha 1	12.06	31.33	17.3	126.97	107.81	72.46	21.65	42.85	34.87
gene2611	COL19A1	collagen, type XIX, alpha 1, transcript variant X2	1.84	1.19	2.36	3.82	3.94	3.36	1.4	1.35	1.49
gene2613	ADGRB3	adhesion G protein-coupled receptor B3, transcript variant X1	0.22	0.08	0.1	0.52	0.58	0.19	0.11	0.17	0.13
gene2639	BEND6	BEN domain containing 6, transcript variant X2	2.66	2.84	1.91	5.33	7.14	5.14	4.7	3.61	2.29
gene2646	BMP5	bone morphogenetic protein 5, transcript variant X1	39.32	60.69	47.71	187.31	217.19	156.43	58.78	40.04	34.47
gene2647	HMGCLL1	3-hydroxymethyl-3-methylglutaryl-CoA lyase-like 1, transcript variant X1	1.4	2	1.54	4.4	4.8	4.71	1.83	0.96	0.91
gene2689	KBTBD11	kelch repeat and BTB (POZ) domain containing 11	2.79	4.91	2.05	10.72	7.79	6.44	4.4	1.81	2
gene2738	TMEM67	transmembrane protein 67	9.26	3.97	5.49	9.05	12.52	11.43	4.91	6.21	4.47
gene2754	NECAB1	N-terminal EF-hand calcium binding protein 1	80.4	66.9	77.71	255.04	383.48	199.11	79.77	66.97	58.45
gene2791	LOC106030559	uncharacterized LOC106030559, transcript variant X1	0.84	0	0.73	1.89	5.86	2.03	0.35	0.71	0
gene2820	ZC2HC1A	zinc finger, C2HC-type containing 1A	7.16	9.78	6.44	13.41	21.37	13.04	9.55	9.13	7.61
gene2826	ZFHX4	zinc finger homeobox 4	4.54	3.64	3.1	8.9	12.45	8.18	5.87	2.3	3.83
gene2855	EYA1	EYA transcriptional coactivator and phosphatase 1, transcript variant X3	0.48	0.61	0.67	0.82	1.07	2.03	0.91	0.77	0.24
gene2883	LOC106030669	chromosome unknown open reading frame, human C8orf46	0	0.36	0	1.23	0.62	1.1	0.07	0.08	0.08
gene3016	SGCB	sarcoglycan, beta (43kDa dystrophin-associated glycoprotein), transcript variant X1	39.14	40.31	38.35	101.57	126.03	89.44	40.34	28.94	25.15
gene3052	DUSP16	dual specificity phosphatase 16	5.66	7.09	5.11	17.67	10.79	14.68	7.26	8.34	8.02
gene3076	PLEKHA5	pleckstrin homology domain containing, family A member 5, transcript variant X1	14.14	9.59	8.39	22.7	33.16	25.59	16.44	11.56	16.56
gene3103	LOC106030914	aldo-keto reductase family 1 member B10-like	2.79	4.48	6.26	12.35	8.77	16.22	6.2	4.82	1.07
gene3127	LOC106030932	mRNA-decapping enzyme 1B-like	0.55	0.3	0.11	1.26	1.43	0.44	0.2	0.28	0.28
gene3172	PKP2	plakophilin 2	2.72	1.99	6.09	20.79	19.52	8.26	10.15	1.85	3.71
gene3194	TMEM178B	transmembrane protein 178B	0.05	0.12	0.1	0.43	0.4	0.26	0.3	0.07	0.12
gene3198	LOC106030999	transcription factor SPT20 homolog, transcript variant X5	1.28	1.54	1.81	3.53	6.3	4.1	2.1	1.61	1.19
gene3234	CCDC53	coiled-coil domain containing 53	30.44	21.66	25.43	44.09	40.84	45.23	26.38	18.03	19.94
gene3345	IFT81	intraflagellar transport 81	3.47	3.92	2.64	9.81	10.83	6.58	4.67	4.33	2.22
gene3373	TCTN2	tectonic family member 2	18.46	14.39	14.69	38.93	67.81	40.69	30.97	13.15	17.41
gene3409	ADGRD1	adhesion G protein-coupled receptor D1, transcript variant X1	2.06	4.24	2.68	7.23	8.13	8.26	5.92	1.94	4.2
gene3431	LOC106031230	uncharacterized LOC106031230, transcript variant X1	2.5	1.46	2.56	7.2	8.69	3.7	1.8	1.72	1.24
gene3436	ZDHHC8	zinc finger, DHHC-type containing 8, transcript variant X1	9.13	9.52	5.65	17.65	17.1	21.92	13.58	11.95	9.43
gene3463	LOC106031264	uncharacterized LOC106031264, transcript variant X2	1.17	1.08	0.36	2.42	8.69	5.14	0.44	1.34	1.97
gene3476	SERPIND1	serpin peptidase inhibitor, clade D (heparin cofactor), member 1, transcript variant X2	7.19	19.49	8.2	97.4	72.85	63.42	41.71	9.57	19.07
gene3521	UPB1	ureidopropionase, beta	0.78	0.23	0.61	5.16	1.53	0.97	0.48	0.29	0.39
gene3529	GNAZ	guanine nucleotide binding protein (G protein), alpha z polypeptide, transcript variant X2	0.43	1	0.43	3.45	2.34	1.16	1.16	0.98	0.48
gene353	CCDC6	coiled-coil domain containing 6	41.29	44.58	32.64	94	107.27	48.4	39.35	32.57	32.15
gene3537	LOC106031329	melanotransferrin-like, transcript variant X3	2.37	5.54	2.76	3.18	12.37	13.28	3.17	1.7	3.56
gene357	BICC1	BicC family RNA binding protein 1, transcript variant X1	20	19.8	14.15	44.34	57.45	33.72	26.97	27.17	28.03
gene3603	TBX3	T-box 3	19.92	4.6	11.15	19.39	21.31	26.45	6.39	15.67	7.63
gene3617	PLEKHH2	pleckstrin homology domain containing, family H (with MyTH4 domain) member 2, transcript variant X2	11.78	8.97	8.63	18.54	41.5	42.68	14.29	7.12	9.48
gene3701	DISP1	dispatched homolog 1 (Drosophila), transcript variant X10	10.75	6.42	9.98	20.12	22.08	16.24	14.93	7.83	9.68
gene3764	LCLAT1	lysocardiolipin acyltransferase 1, transcript variant X1	31.14	19.33	24.39	49.78	45.45	36.2	22.12	21.03	21.53
gene3775	SRSF5	serine/arginine-rich splicing factor 5, transcript variant X1	100	49.7	66.05	125.23	188.09	206.03	49.82	62.04	53.66
gene3782	GALNT16	polypeptide N-acetylgalactosaminyltransferase 16, transcript variant X2	15.39	19.7	17.16	47.23	36.81	41.96	20.27	25.17	16.04
gene3842	ACTC1	actin, alpha, cardiac muscle 1	1.67	1.56	0.53	5.73	9.43	13.71	0	1.39	1.4
gene3871	AKAP6	A kinase (PRKA) anchor protein 6, transcript variant X7	0.39	0.54	0.3	2.18	2.76	1.11	0.84	0.31	0.22
gene3875	NPAS3	neuronal PAS domain protein 3	0.85	2.04	0.36	4.87	4.82	4.99	1.66	0.87	0.95
gene3893	PNPLA2	patatin-like phospholipase domain containing 2	315.83	156.74	195.76	1047.65	850.46	1122.37	116.23	149.79	308.19
gene3899	TSPAN4	tetraspanin 4, transcript variant X3	23.39	38.65	25.96	92.62	93.59	83.11	41.06	37.39	30.83
gene3909	MBNL2	muscleblind-like splicing regulator 2, transcript variant X1	12.21	8.77	6.69	23.64	18.91	19.73	9.85	9.61	13.31
gene3988	SORCS3	sortilin-related VPS10 domain containing receptor 3, transcript variant X3	0.26	0.13	0.02	1.47	0.38	0.43	0.52	0.24	0.15
gene399	LOC106032324	uncharacterized LOC106032324	0.06	0.04	0.05	0.36	0.18	0.18	0	0.1	0.04
gene400	NRG3	neuregulin 3, transcript variant X3	0.63	0.41	1.6	3.16	1.79	1.62	0.47	1.08	0.74
gene4032	TCF7L2	transcription factor 7-like 2 (T-cell specific, HMG-box)	6.23	3.99	6.13	12.24	14.17	13.15	5.72	4.14	3.85
gene4035	NRAP	nebulin-related anchoring protein	0.18	0.17	0.09	0.38	0.59	0.57	0.2	0.32	0.18
gene4042	TDRD1	tudor domain containing 1	0.02	0.81	0.46	1.89	2.16	2.15	0.67	0.04	0.31
gene4052	ATRNL1	attractin-like 1, transcript variant X1	0.7	2.53	0.92	9.43	6.27	9.04	3.8	0.5	0.49
gene4063	LOC106031961	uncharacterized LOC106031961, transcript variant X7	0.36	0.16	0.31	0.87	0.75	1.11	0.76	0.51	0.12
gene4077	GOLIM4	golgi integral membrane protein 4, transcript variant X1	70.44	82.38	57.73	124.8	167.74	151.83	78.18	82.7	66.81
gene4080	MECOM	MDS1 and EVI1 complex locus, transcript variant X1	8.37	8.08	6.52	10.53	21.9	23.69	6.56	14.11	7.63
gene4109	NCEH1	neutral cholesterol ester hydrolase 1	19.96	18.11	11.95	34.95	42.67	40.93	21.07	21.2	21.24
gene4114	NAALADL2	N-acetylated alpha-linked acidic dipeptidase-like 2, transcript variant X1	1.97	1.57	0.71	11.52	4.04	5.19	2.97	1.48	1.7
gene4127	LOC106032022	calcium-activated potassium channel subunit beta-2, transcript variant X2	6.21	23.23	7.13	42.5	46.06	17.73	38.63	5.66	2.42
gene4190	RADIL	Ras association and DIL domains	5.65	2.23	2.01	7.97	5.11	15.41	11.23	1.92	2.57
gene421	RET	ret proto-oncogene	5.07	3.84	2.33	14.46	16.53	6.39	4.16	1.55	5.94
gene4257	CACNA1H	calcium channel, voltage-dependent, T type, alpha 1H subunit, transcript variant X1	1.29	1.85	0.84	2.99	2.01	3.64	0.49	2.19	1.16
gene4262	C1QTNF8	C1q and tumor necrosis factor related protein 8, transcript variant X2	13.06	62.48	20.73	108.3	103.14	62.78	96.87	10.49	4.51
gene4266	LMF1	lipase maturation factor 1	5.59	6.6	5.49	12.19	10.97	12.02	6.01	5.46	4.36
gene4308	ZNF827	zinc finger protein 827, transcript variant X5	1.82	1.81	1.02	2.86	3.29	3	0.97	0.74	2.15
gene4318	ARHGAP10	Rho GTPase activating protein 10, transcript variant X1	14.77	12.66	12.19	31.73	28.89	31.97	17.97	20.24	19.63
gene4331	SH3D19	SH3 domain containing 19	18.31	33.1	20.3	49.98	63.09	67.88	49.67	17.54	22.04
gene4338	LOC106032252	uncharacterized LOC106032252	0.31	0.22	0.18	0.31	0.76	1	0.15	0.28	0.16
gene4343	TRIM2	tripartite motif containing 2, transcript variant X1	3.56	2.22	1.78	8.66	8.95	10.03	2.3	1.77	1.7
gene4347	LOC106032265	uncharacterized LOC106032265, transcript variant X8	17.92	9.75	10.19	32.53	34.15	18.12	20.14	11.83	11.27
gene440	DLG5	discs, large homolog 5 (Drosophila), transcript variant X1	5.55	4.96	4.12	6.87	9.74	12.35	3.84	5.2	4.64
gene4424	CPE	carboxypeptidase E, transcript variant X1	66.17	40.34	82.54	152.41	188.04	94.35	60.63	63.18	74.41
gene4508	LAMA2	laminin, alpha 2, transcript variant X1	1.62	4.65	2.55	14.78	14.63	8.97	3.12	4.3	2.26
gene4645	SOBP	sine oculis binding protein homolog, transcript variant X1	2.56	1.49	2.05	4.02	4.78	3.48	2.28	1.76	1.68
gene4830	ADAMTS2	ADAM metallopeptidase with thrombospondin type 1 motif, 2, transcript variant X2	23.29	42.65	25.57	55.53	70.06	45.72	22.16	35.82	25.78
gene4849	PDGFRB	platelet-derived growth factor receptor, beta polypeptide, transcript variant X1	63.67	46.56	42.76	91.15	178.82	153.86	73.45	63.75	76.78
gene4853	ARSI	arylsulfatase family, member I	7.73	9.26	12.55	19.86	21.8	16.94	10.57	7.68	6.12
gene4861	DCTN4	dynactin 4 (p62), transcript variant X1	79.87	63.99	58.28	182.86	146.95	112.63	50.24	65.52	60.3
gene4919	EBF1	early B-cell factor 1, transcript variant X1	26.31	20.77	19.14	40.6	65.17	48.62	28.71	21.37	24.99
gene4941	ROR1	receptor tyrosine kinase-like orphan receptor 1, transcript variant X4	9.22	9.91	9.61	23.28	20.61	18.28	13.48	11.76	8.44
gene4952	KANK4	KN motif and ankyrin repeat domains 4	15.8	21.37	11.01	38.9	34.05	40.39	23.31	7.66	10.6
gene4956	NFIA	nuclear factor I/A	14.96	16.46	11.47	37.82	35.84	26.67	16.56	17.27	13.55
gene5049	TRABD2B	TraB domain containing 2B	1.23	2.31	1.39	7.86	6.43	6.3	3.7	2.11	1.08
gene5050	LOC106033090	uncharacterized LOC106033090, transcript variant X2	0.15	0.58	0.11	2.24	1.6	0.99	0.49	0.37	0.12
gene5059	LOC106032947	cytochrome P450 4B1-like	1.09	1.27	1.26	3.03	3.2	2.84	1.6	1.35	1.1
gene5066	DMBX1	diencephalon/mesencephalon homeobox 1	0.07	0	0.04	0.61	0.35	0.59	0.07	0.22	0.09
gene508	FGFRL1	fibroblast growth factor receptor-like 1, transcript variant X2	17.87	32.32	22.94	91.03	51.42	62.15	22.96	13.65	27.82
gene513	SPON2	spondin 2, extracellular matrix protein, transcript variant X1	17.6	61.23	28.29	300.47	207.77	298.58	44.65	21.11	9.94
gene5154	ZDHHC1	zinc finger, DHHC-type containing 1	0.4	0.96	0.33	0.82	1.37	2.99	0.37	0.45	0.41
gene5244	LOC106033226	uncharacterized LOC106033226, transcript variant X1	0	0.02	0	0.2	0.13	0.24	0	0	0.04
gene5329	LOC106033340	ankyrin repeat and fibronectin type-III domain-containing protein 1-like	5.59	3.15	3.51	9.8	11.63	7.58	3.88	3.45	3.34
gene5391	LOC106033601	hemoglobin subunit alpha-A	3618.85	1267.88	1655.18	5200.7	7648.4	8733	1443.2	3437.38	4285.71
gene5392	LOC106033591	hemoglobin subunit alpha-D	266.43	61.5	106.34	234.93	399.38	361.93	123.34	281.95	241.61
gene5407	SHISA9	shisa family member 9	0	0.02	0.05	0.52	0.25	0.11	0	0.15	0.09
gene5436	XYLT1	xylosyltransferase I, transcript variant X1	17.28	13.99	7.39	74.43	40.41	33.23	15.87	15.2	15.06
gene5452	GPRC5B	G protein-coupled receptor, class C, group 5, member B, transcript variant X1	9.4	6.23	6	26.22	15.88	14.44	10.7	2.71	5.56
gene5467	DNAH3	dynein, axonemal, heavy chain 3, transcript variant X1	0.08	0.05	0.04	0.15	0.15	0.15	0.05	0.05	0.05
gene5491	CYTH3	cytohesin 3	55.55	30.5	37.8	99.87	137.86	103.4	54.23	48.47	43.41
gene5513	LOC106033525	uncharacterized LOC106033525	1.24	0.12	0.56	0.62	1.78	2.52	0.72	0.29	0.94
gene5593	LOC106033657	tropomodulin-2, transcript variant X1	1.43	1.93	1.47	6.96	7.5	2.73	2.83	0.85	0.75
gene56	DNMBP	dynamin binding protein	28.5	13.64	23.01	33.73	43.39	32.57	20.19	18.62	15.84
gene5618	CCPG1	cell cycle progression 1, transcript variant X3	43.55	43.85	34.9	79.44	106.39	80.93	45.29	35.49	51.13
gene5649	FAM81A	family with sequence similarity 81, member A, transcript variant X2	5.87	0.94	1.76	1.62	14.63	13.73	1.26	6.25	0.74
gene5653	THSD4	thrombospondin, type I, domain containing 4, transcript variant X1	9.01	14.78	7.68	15.82	20.08	28.26	14.92	13.05	14.27
gene57	CPN1	carboxypeptidase N, polypeptide 1	16.54	16.14	14.49	44.16	20.07	27.4	20.38	13.42	5.71
gene5700	TLN2	talin 2, transcript variant X1	4.57	4.02	3.91	7.11	8.59	8.1	3.67	3.64	3.55
gene5731	SLC43A3	solute carrier family 43, member 3, transcript variant X1	3.42	2.17	2.47	5.54	7.26	10.67	2.66	2.25	2.74
gene579	ABLIM2	actin binding LIM protein family, member 2, transcript variant X1	1.12	2.51	2.06	9.22	4.78	6.11	2.73	0.29	1.07
gene5818	TCP11L1	t-complex 11, testis-specific-like 1, transcript variant X2	9.47	9.39	6.09	19.95	16.47	14.93	6	9.82	8.92
gene582	SORCS2	sortilin-related VPS10 domain containing receptor 2, transcript variant X2	9.12	22.66	12.8	35.54	49.56	59.9	11.2	10.12	12.4
gene5829	OLFML1	olfactomedin-like 1	18.58	15.83	21.24	56.01	47.02	32.8	26.16	25.7	15.44
gene5855	SOX6	SRY (sex determining region Y)-box 6, transcript variant X2	1.16	0.42	0.56	1.81	2.72	4.06	0.74	0.58	2.55
gene5951	LOC106034081	uncharacterized LOC106034081	2.3	1.14	2.42	7.54	8.63	2.57	1.92	2.37	1.27
gene596	WFS1	Wolfram syndrome 1 (wolframin)	21.79	12.19	21	34.54	29.09	37.72	14.8	17.63	17.08
gene6010	LOC106034203	matrix metalloproteinase-27-like	59.57	121.11	89.85	369.09	584.03	654.14	297.8	127.1	58.9
gene6017	CEP126	centrosomal protein 126kDa	0.22	0.23	0.3	1.07	3.6	1.1	0.31	0.11	0.16
gene6018	ANGPTL5	angiopoietin-like 5	0.15	2.47	0.1	11.61	5.14	7.34	3.41	0.05	0.33
gene6031	MAML2	mastermind-like 2 (Drosophila)	16.48	14.45	11.78	35.47	36.06	23.98	13.25	13.06	14.76
gene6094	SASH1	SAM and SH3 domain containing 1, transcript variant X1	28.81	28.87	20.23	76.36	54.16	41.06	33.99	31.05	30.52
gene6138	CLDN20	claudin 20, transcript variant X1	0.22	0.1	0.09	0.38	0.84	0.47	0.08	0.19	0.06
gene6149	SNX9	sorting nexin 9	74.61	44.82	50.38	129.22	131.38	99.07	71.45	54.98	68.62
gene6150	LOC106034246	uncharacterized LOC106034246, transcript variant X1	0.18	0.09	0.16	0.5	0.46	0.42	0.13	0.13	0.11
gene6163	CNTNAP5	contactin associated protein-like 5	0.21	0.52	0.08	0.81	0.57	0.97	0.4	0.02	0.21
gene6166	LOC106034313	protocadherin Fat 4-like	52.01	67.13	38.3	248.58	209.49	139.65	77.51	86.91	60.68
gene6293	LOC106034579	uncharacterized LOC106034579, transcript variant X1	0.8	0.43	1.19	1.98	3.16	1.91	0.89	0.65	0.41
gene6318	AGAP1	ArfGAP with GTPase domain, ankyrin repeat and PH domain 1, transcript variant X1	13.1	8.88	7.71	19.17	21.76	19.03	14.41	11.76	12.19
gene6322	IQCA1	IQ motif containing with AAA domain 1, transcript variant X1	1.54	1.83	1.55	4.8	5.17	4.04	2.38	1.45	0.49
gene639	C1QTNF7	C1q and tumor necrosis factor related protein 7, transcript variant X1	7.73	3.94	4.46	24.66	16	10.35	14.18	2.64	2.82
gene6400	LOC106034543	uncharacterized LOC106034543	2.33	2.62	2.5	8.33	13.2	9.33	1.9	5.74	2.1
gene6403	LOC106034522	uncharacterized LOC106034522, transcript variant X1	0.09	0.03	0.05	0.53	0.2	0.2	0.07	0.05	0.08
gene6420	MSTN	myostatin	3.34	15.92	2.42	80.48	20.04	34.47	13.35	0.51	6.53
gene6446	LOC106034745	ATP-binding cassette sub-family A member 8-like	0.13	0.97	0.36	0.62	2.99	5.43	1.13	1.17	1.33
gene6451	ARSG	arylsulfatase G	14.76	17.87	18.7	37.69	38.75	23.24	18.17	11.19	12.02
gene6465	LOC106034680	uncharacterized LOC106034680	0.16	0.51	0.13	1.13	1.58	0.6	0.21	0.43	0.29
gene6478	LOC106034642	chromosome unknown open reading frame, human C17orf58	0.77	0.95	0.5	1.92	2.13	1.37	0.58	0.56	0.83
gene6487	TEX2	testis expressed 2	40.04	27.43	32.88	91.06	82.88	78.47	27.34	37.86	32.86
gene650	LDB2	LIM domain binding 2, transcript variant X1	38.82	40.79	36.68	74.73	72.33	91.74	35.39	46.3	35.58
gene6519	HLF	hepatic leukemia factor	12.48	9.95	9.96	28.67	30.87	25.57	11.5	11.48	11.22
gene6522	STXBP4	syntaxin binding protein 4, transcript variant X1	1.82	1.06	1.95	4.31	5.78	4.68	1.8	0.72	1.2
gene6553	CHAD	chondroadherin, transcript variant X1	12.28	21.05	11.05	90.07	77.89	32.5	18.92	8.55	16.51
gene6683	F13A1	coagulation factor XIII, A1 polypeptide, transcript variant X2	36.01	34.02	36.84	210.39	199.9	223.89	90.27	27.91	16.34
gene6695	ANKH	ANKH inorganic pyrophosphate transport regulator	18.93	18.13	21.91	57.27	50.16	36.74	47.77	19.79	21.76
gene6749	PTPRM	protein tyrosine phosphatase, receptor type, M, transcript variant X1	29.9	35.55	27.79	60.59	85.68	72.02	22.7	32.26	26.85
gene6760	RAB31	RAB31, member RAS oncogene family, transcript variant X1	25.15	15.95	15.73	46.83	60.71	40.43	38.97	22.95	25.72
gene6774	CIDEA	cell death-inducing DFFA-like effector a	22.81	4.68	13.85	28.85	48.07	41.16	18.08	25.57	16.7
gene6808	LOC106035094	fibrinogen-like protein 1, transcript variant X1	4.06	5.29	4.97	30.53	30.09	22.19	5.48	2.9	4.61
gene686	SOD3	superoxide dismutase 3, extracellular, transcript variant X2	309.27	326.85	416.12	1109.62	619.6	627.31	502.04	408.91	248.89
gene6892	VWA8	von Willebrand factor A domain containing 8, transcript variant X1	12.76	8.55	6.11	21.47	23.18	15.21	6.29	8.58	7.42
gene6943	MICU3	mitochondrial calcium uptake family, member 3	8.11	6.38	6.14	10.33	14.4	14.55	6.13	6.46	5.85
gene6952	LOC106035236	uncharacterized LOC106035236	1.15	1.29	0.88	3.25	4.33	3.66	1.31	0.4	0.49
gene6972	SORBS2	sorbin and SH3 domain containing 2, transcript variant X1	15.24	17.05	17.44	13.08	23.78	90.28	6.18	13.63	20.11
gene700	RBPJ	recombination signal binding protein for immunoglobulin kappa J region, transcript variant X1	30.67	26.2	19.48	56	55.33	56.87	29.95	17.81	33.31
gene702	TBC1D19	TBC1 domain family, member 19	2.11	1.28	4.17	2.11	8.74	3.87	3.13	2.57	1.57
gene7035	LOC106035297	uncharacterized LOC106035297, transcript variant X1	0.06	0.33	0.28	0.79	0.8	0.89	0.18	0.08	0.27
gene7036	MATN2	matrilin 2, transcript variant X1	6.41	22.96	11.4	66.23	53.91	52.07	13.05	15.19	5.9
gene7043	NIPAL2	NIPA-like domain containing 2	0.94	2.44	2.6	13.46	5.83	7.17	1.75	0.64	1.12
gene7048	OSR2	odd-skipped related transciption factor 2	27.34	31.65	38.84	118.24	99.81	73.97	50.79	39.59	22.83
gene7199	LOC106035428	sodium- and chloride-dependent creatine transporter 1-like	24.07	21.9	28.23	57.6	57	45.01	19.49	30.41	15.05
gene7277	PDZRN3	PDZ domain containing ring finger 3, transcript variant X1	12.82	16.91	14.79	35.18	35.79	28.16	20.84	23.37	13.15
gene7279	LOC106035440	E3 ubiquitin-protein ligase PDZRN3-like	3.97	8.33	2.87	22.87	29.81	26.5	10.09	13.46	4.93
gene7292	RELN	reelin	4.18	9.44	4.9	43.59	18.13	27.76	14.79	5.48	11.69
gene7300	FBXL13	F-box and leucine-rich repeat protein 13	0.94	0.36	0	3.36	2.85	4.42	0.76	0.29	0.54
gene7302	FAM185A	family with sequence similarity 185, member A	48.58	67.8	52.96	140.44	122.97	93.15	75.13	51.15	50.83
gene7312	MAGI2	membrane associated guanylate kinase, WW and PDZ domain containing 2	2.62	3.05	1.83	6.92	8.04	7.25	1.65	1.92	3.06
gene7319	SEMA3C	sema domain, immunoglobulin domain (Ig), short basic domain, secreted, (semaphorin) 3C, transcript variant X1	58.48	281.91	90.49	359.12	427.72	619.88	258.12	260.72	127.49
gene7326	SEMA3E	sema domain, immunoglobulin domain (Ig), short basic domain, secreted, (semaphorin) 3E, transcript variant X1	0.03	0.29	0.08	0.5	1.86	3.63	0.05	0.04	0.13
gene7329	SEMA3D	sema domain, immunoglobulin domain (Ig), short basic domain, secreted, (semaphorin) 3D, transcript variant X2	5.05	15.65	4.65	69.47	37.93	53.69	25.63	2.68	9.27
gene7357	ARL15	ADP-ribosylation factor-like 15, transcript variant X2	36.55	40.45	31.53	62.64	74.78	51.95	29.48	27.81	31.78
gene7416	ADAMTS6	ADAM metallopeptidase with thrombospondin type 1 motif, 6, transcript variant X3	1.07	1.57	1.55	2.01	3.79	5.03	1.04	1.11	1.08
gene7499	CD99	CD99 molecule, transcript variant X1	192.53	202.6	161.32	757.98	779.99	379.9	441.22	360.9	229.59
gene7519	IGF1	insulin-like growth factor 1 (somatomedin C)	6.36	6.53	12.16	41.62	32.69	28.71	6.17	5.76	3.66
gene752	SYNE3	spectrin repeat containing, nuclear envelope family member 3, transcript variant X1	34.36	24.52	18.49	54.59	60.85	49.98	45.8	31.43	28.61
gene7626	LOC106035790	histone H5	13.56	8.74	13.1	23.75	23.77	36.49	13.37	17.89	22
gene7689	ANKS6	ankyrin repeat and sterile alpha motif domain containing 6	31.18	29.21	25.81	54.85	56.13	58.59	28.32	27.74	20.73
gene7724	LRRC16A	leucine rich repeat containing 16A	16.56	11.75	14.94	15.68	31.04	36.57	14.35	17.6	8.28
gene7793	SIK1	salt-inducible kinase 1, transcript variant X1	60.12	48.85	62.81	136.99	142.75	146.6	42.51	67.51	97.3
gene7814	LOC106036121	uncharacterized LOC106036121	0.05	0.16	0.18	0.49	0.98	0.42	0.05	0.1	0.1
gene7870	AGTR1	angiotensin II receptor, type 1	0.26	0.61	0.43	1.57	0.99	9.32	0.78	0.13	0.76
gene7874	LOC106036167	zinc finger protein ZIC 1	0.25	1.42	0.06	13.35	20.94	11.08	0.51	0	4.01
gene7975	FGF10	fibroblast growth factor 10, transcript variant X3	4.34	10.17	6.14	28.07	16.21	23.76	10.11	4.39	2.65
gene8006	PTGER4	prostaglandin E receptor 4 (subtype EP4)	15.62	10.34	25.18	16.91	48.09	32.53	9.33	18.15	21.25
gene8057	CCBE1	collagen and calcium binding EGF domains 1	2.34	1.29	1.68	4.63	3.85	5.35	0.75	2.14	1.28
gene8096	MFGE8	milk fat globule-EGF factor 8 protein	253.87	249.65	259.96	653.04	965.37	622.36	285.56	116.03	126.68
gene8109	LOC106036462	uncharacterized LOC106036462, transcript variant X1	0.27	0.79	0.1	0.99	1.23	2.58	0.49	0.31	0.71
gene8117	LOC106036455	A-kinase anchor protein 13-like	7.17	8.63	2	15.88	16.29	11.08	5.81	9.37	12.21
gene8151	FAM169B	family with sequence similarity 169, member B, transcript variant X1	1.35	0.76	2.69	6.31	5.11	2.58	0.83	1.07	1.55
gene8154	SYNM	synemin, intermediate filament protein	10.75	12.35	7.73	28.27	20.14	37.53	14.84	15.78	11.79
gene8156	MEF2A	myocyte enhancer factor 2A, transcript variant X1	43.51	37.58	28.41	76.54	80.3	62.49	36.32	45.46	39.35
gene8169	VIMP	VCP-interacting membrane selenoprotein	137.74	141.24	166.26	311.05	293.29	228.95	149.77	143.44	114.68
gene8185	CILP	cartilage intermediate layer protein, nucleotide pyrophosphohydrolase	2.95	9.6	6.6	24.07	47.53	12.17	28.45	5.79	3.59
gene8188	IGDCC3	immunoglobulin superfamily, DCC subclass, member 3	25.17	72.78	34.64	84.7	104.93	65.01	41.05	54.92	28.88
gene8197	COBL	cordon-bleu WH2 repeat protein, transcript variant X3	9.61	3.55	14.12	23.65	24.07	23.02	5.89	8.29	9.09
gene8300	LOC106036638	leucine-rich repeat neuronal protein 4-like	5.35	5.65	6.16	12.87	20.34	22.83	12.43	7.11	9.35
gene8354	OXTR	oxytocin receptor	15.87	5.67	8.69	47.01	38.82	26.2	4.77	19.62	6.58
gene8357	SSUH2	ssu-2 homolog (C. elegans)	0.61	1	0.55	1.38	1.46	1.5	0.55	0.91	0.44
gene8472	CRHR2	corticotropin releasing hormone receptor 2, transcript variant X1	5.48	7.09	6.47	7.98	9.21	47.52	5.25	5.42	4.18
gene8478	VILL	villin-like, transcript variant X1	1.37	1.89	2.41	8.98	10.25	5	1.61	1.84	1.58
gene8482	ACAA1	acetyl-CoA acyltransferase 1	29.83	10.92	17.97	56.06	44.67	60.27	14.47	8.12	36.34
gene8491	XIRP1	xin actin binding repeat containing 1	0	0.01	0.01	0.27	0.03	0.02	0	0.03	0
gene8522	LOC106036885	uncharacterized LOC106036885, transcript variant X4	1.06	1.47	1.05	7.03	4.85	7.7	0.83	0.96	1.38
gene8538	LUM	lumican	332.48	702.18	554.88	1418.33	2050.45	1334.69	862.33	725.55	488.23
gene8539	DCN	decorin	877.44	1897.11	1512.85	4619.59	4246.23	3190.9	2215.75	1633.01	1261.89
gene8543	EEA1	early endosome antigen 1	16.99	13.26	13.94	23.47	30.26	27.16	14.57	10.77	14.21
gene8689	LOC106037040	niban-like protein 1	61.3	40.2	61.04	137.68	110	104.21	51.11	110.74	66.99
gene8759	ENTPD2	ectonucleoside triphosphate diphosphohydrolase 2, transcript variant X1	27.09	26.57	16.04	116.87	38.88	55.81	41.47	26.63	40.37
gene8808	SYT16	synaptotagmin XVI, transcript variant X9	0.81	0.63	2.1	3.49	7.78	0.87	0.65	1.24	1.26
gene8849	AHNAK2	AHNAK nucleoprotein 2	49.19	54.79	47.2	120.2	185.85	97.72	52.41	28.78	44.54
gene885	ZBTB20	zinc finger and BTB domain containing 20, transcript variant X1	22.16	20.36	21.09	43.59	53.65	49.91	25.37	30.42	17.32
gene8894	LOC106037310	SET-binding protein-like, transcript variant X3	0.88	0.48	0.5	1.34	1.69	1.18	0.88	0.41	0.82
gene8895	SETBP1	SET binding protein 1	6.97	5.49	3.3	13.26	14.77	11.46	4.91	3.93	6.83
gene8943	PCDH11X	protocadherin 11 X-linked	0.49	0.45	0.59	0.87	1.08	1.65	0.44	0.33	0.4
gene8961	SRPX2	sushi-repeat containing protein, X-linked 2	10.9	9.15	8.75	15.77	31.14	13.06	12.35	6.36	6.61
gene8973	FGF13	fibroblast growth factor 13, transcript variant X1	0.48	0.75	0.16	0.5	2.31	2.4	0.39	0.73	0.62
gene9004	GPC4	glypican 4	70.27	66.58	73.11	138.72	144.33	78.02	78.81	45.79	51.54
gene9051	ISPD	isoprenoid synthase domain containing, transcript variant X1	4.16	4.24	5.61	7.95	9.29	8.96	4.39	3.61	3.95
gene9058	ETV1	ets variant 1, transcript variant X1	3.83	3.78	3.25	8.35	10.71	8.02	9.92	3.63	3.27
gene9061	SCIN	scinderin	49.85	40.58	38.37	115.41	105.88	192.41	30.5	42.49	40.5
gene9133	ANKRD29	ankyrin repeat domain 29, transcript variant X1	4.9	6.42	4.18	20.75	21.06	13.84	16.45	2.39	5.41
gene9134	LOC106037563	laminin subunit alpha-3-like	6.75	6.5	2.49	15.25	10.92	11.87	4.72	5.04	11.56
gene9144	ZNF521	zinc finger protein 521, transcript variant X1	25.94	34.43	28.25	60.84	66.18	52.19	57.99	29.18	28.84
gene9206	LOC106037682	uncharacterized LOC106037682, transcript variant X2	15.39	23.93	14.46	30.87	40.32	46.05	22.04	20.01	14.11
gene929	GPR161	G protein-coupled receptor 161, transcript variant X2	5.05	5.78	3.02	13.08	18.31	13.23	7.03	6.45	4.99
gene9309	MTCP1	mature T-cell proliferation 1, transcript variant X1	2.93	3.13	2.8	4.95	6.36	6.12	2.17	2.57	2.37
gene9325	PIGA	phosphatidylinositol glycan anchor biosynthesis, class A	3.97	3.97	5.35	7.16	8.87	8.02	3.07	3.56	4.35
gene937	COL8A1	collagen, type VIII, alpha 1	2.21	3.78	4.77	11.28	26.05	22.83	3.08	0.68	5.32
gene9377	ACOT9	acyl-CoA thioesterase 9	46.2	61.98	34.96	104.99	106.91	84.09	43	41.78	29.64
gene9475	LOC106037948	uncharacterized LOC106037948	11.34	12.93	7.26	6.85	38.22	44.97	11.03	7.8	7.7
gene9513	COL8A2	collagen, type VIII, alpha 2	4.47	4.35	8.23	10.57	19.55	19.26	7.76	6.81	3.72
gene959	LOC106038723	putative protein FAM172B, transcript variant X1	1.05	1.85	0.95	4.51	3.02	2.03	1.69	1.75	1.04
gene9604	PODXL2	podocalyxin-like 2, transcript variant X1	0.86	0.71	0.84	1.11	2.4	1.54	0.95	1.69	0.49
gene9607	CHCHD6	coiled-coil-helix-coiled-coil-helix domain containing 6, transcript variant X1	31.22	59.36	47.19	79.05	100.22	76.31	49.96	35.84	29.02
gene9726	ABCC9	ATP-binding cassette, sub-family C (CFTR/MRP), member 9	10.7	6.56	8.67	10.93	17.18	32.19	3.71	9.35	8.08
gene9740	SSPN	sarcospan	12.23	9.36	13.31	29.99	27.51	20.09	16.84	7.99	7.2
gene9750	PPFIBP1	PTPRF interacting protein, binding protein 1 (liprin beta 1)	57.11	51.92	39.95	69.5	106.51	107.21	38.37	45.38	39.07
gene9764	SCUBE1	signal peptide, CUB domain, EGF-like 1, transcript variant X1	3.44	6.07	4.6	7.66	6.74	20.65	3.3	5.21	3.74
gene9781	PHF21B	PHD finger protein 21B, transcript variant X1	0.83	0.44	0.6	1.13	2.14	2.51	0.5	0.61	0.38
gene9790	FBLN1	fibulin 1, transcript variant X1	23.32	50.71	31.07	63.42	123.88	106.02	71.98	29.01	42.51
gene9875	TMEM108	transmembrane protein 108, transcript variant X2	0.97	0.97	0.85	5.91	2.4	1.75	0.54	0.53	0.95
gene9996	NOV	nephroblastoma overexpressed	5.93	8.34	14.04	4.53	53.96	31.38	13.72	11.82	18.56

## Sheet: 5profile
Gene.id	symbol	Gene_description	D1201	D1202	D1203	D3001	D3002	D3003	D701	D702	D703
gene10129	ZGRF1	zinc finger, GRF-type containing 1, transcript variant X1	3.67	6.4	3.5	0.9	1.11	1.26	0.96	0.91	3.32
gene1061	LOC106039869	uncharacterized LOC106039869, transcript variant X1	1.08	3.59	1.51	0.17	0.41	0.04	0.09	0.36	1.32
gene10885	LOC106039393	zinc finger protein Gfi-1-like	8.28	7.91	4.63	1.01	1.29	2.19	1.9	1.46	6.08
gene10896	CDC7	cell division cycle 7, transcript variant X1	2.97	2.02	4.09	1.25	1.46	0.75	1.38	0.95	1.71
gene11111	CRTAM	cytotoxic and regulatory T cell molecule, transcript variant X1	8.6	6.77	7.83	0.48	0.08	0.66	0.36	0.79	3.81
gene11145	COLCA2	colorectal cancer associated 2	3.12	2.07	2.5	0.84	0.34	0.34	0.49	0.25	2.13
gene11274	KCTD21	potassium channel tetramerization domain containing 21, transcript variant X1	3.96	4.01	2.84	0.56	1.29	2.1	1.94	1.67	2.09
gene11991	LOC106040661	carboxyl-terminal PDZ ligand of neuronal nitric oxide synthase protein-like	7.03	1.6	8.72	1.94	2.23	1.29	2.09	2.93	2.12
gene12094	SLC17A9	solute carrier family 17 (vesicular nucleotide transporter), member 9	3.68	4.01	4.87	2.02	1.92	1.87	2.13	4.24	1.73
gene12791	FASLG	Fas ligand (TNF superfamily, member 6)	6.59	4.39	1.25	0.73	1.13	0.49	1.45	0.59	1.36
gene12904	RBM24	RNA binding motif protein 24	4.4	4.97	5.58	0.98	1.22	3.84	1.78	2.39	4
gene13153	GPR22	G protein-coupled receptor 22	0.71	0.15	2.36	0.04	0.28	0.1	0.26	0.45	0.23
gene13349	RTTN	rotatin	3.12	2.18	2.1	0.8	0.89	1.24	1.05	1.01	2.14
gene13415	CLHC1	clathrin heavy chain linker domain containing 1	16.73	4.53	14.15	2.34	6.28	5.96	12.73	5.47	3.02
gene14107	LOC106043053	uncharacterized LOC106043053, transcript variant X3	0.31	0.25	0.17	0.02	0.06	0.02	0.12	0.02	0.1
gene14154	LOC106043112	receptor-interacting serine/threonine-protein kinase 2-like	20.73	14.8	15.99	5.4	7.58	6.71	10.65	6	14.94
gene14460	LOC106043431	trifunctional purine biosynthetic protein adenosine-3-like, transcript variant X1	1.09	0.56	1.23	0	0.04	0.04	0	0.1	0.16
gene14555	LOC106043564	uncharacterized LOC106043564	10.9	6.16	9.27	1.71	3.49	5.89	3.1	3.74	8.67
gene1469	LOC106044166	uncharacterized LOC106044166, transcript variant X1	5.3	2.96	4.32	0.96	2.05	2.14	3.14	1.42	2.41
gene14703	LOC106043688	G-protein coupled receptor 98-like	14.05	12.31	14.42	5.24	3.66	4.84	5.68	2.77	8.28
gene15289	RBP7	retinol binding protein 7, cellular	1170.51	1378.19	1196.87	414.08	539.82	1205.5	297.88	377.62	719.7
gene15383	UNC5D	unc-5 netrin receptor D, transcript variant X1	1.71	1	0.54	0.09	0.59	0.23	0.14	0.24	0.92
gene15678	CST7	cystatin F (leukocystatin)	18.53	10.69	8.24	2.69	2.03	2.54	3.96	1.89	10.18
gene15698	DTD1	D-tyrosyl-tRNA deacylase 1	23.53	17.73	19.41	6.38	7.99	11.53	9.2	9.76	12.81
gene15967	XPC	xeroderma pigmentosum, complementation group C	30.71	26.08	36.68	8.11	13.68	16.54	12.99	16.03	27.72
gene15999	SEMA4D	sema domain, immunoglobulin domain (Ig), transmembrane domain (TM) and short cytoplasmic domain, (semaphorin) 4D, transcript variant X4	16.08	5.56	14.67	5.97	7	6.24	4.7	4.44	6.18
gene16171	FZD8	frizzled class receptor 8	15.9	11.21	16.25	5.87	3.39	3.42	5.06	4.27	3.8
gene16216	TBCK	TBC1 domain containing kinase, transcript variant X1	6.5	5.32	5.13	2.37	1.36	2.72	2.64	3.06	4.31
gene16312	LOC106045454	uncharacterized LOC106045454, transcript variant X1	0.82	0.34	0.35	0.09	0.08	0.18	0.13	0.08	0.21
gene16446	TMEM17	transmembrane protein 17, transcript variant X3	3.96	2.85	4.24	1.72	0.68	2.16	1.85	2.05	2.32
gene16665	PPFIA4	protein tyrosine phosphatase, receptor type, f polypeptide (PTPRF), interacting protein (liprin), alpha 4	2.09	2.61	2.44	0.52	0.93	0.88	0.91	0.96	0.57
gene16783	LOC106045966	Ig heavy chain Mem5-like	263.03	188.1	87.94	53.99	60.84	66.06	73.14	39.04	178.16
gene16949	CACNA1S	calcium channel, voltage-dependent, L type, alpha 1S subunit	0.13	0.14	0.1	0	0.02	0	0.02	0.04	0
gene17645	ACTR3B	ARP3 actin-related protein 3 homolog B (yeast)	35.81	38.69	38.31	13.61	12.53	23.04	12.69	9.33	32.77
gene17736	LOC106047024	-	9.56	5.36	13.52	4.4	2.16	1.29	0.81	6.99	3.18
gene17737	RAD51	RAD51 recombinase	7.96	8.69	12.42	4.45	4.07	2.59	4.5	3.34	7.55
gene17756	PAK6	p21 protein (Cdc42/Rac)-activated kinase 6, transcript variant X4	14.09	15.52	15.08	4.94	6.02	8.49	5.3	8.55	7.42
gene17757	BUB1B	BUB1 mitotic checkpoint serine/threonine kinase B	11.17	9.08	8.66	2.31	3.93	2.5	3.32	2.38	8.74
gene17820	COMMD7	COMM domain containing 7	43.59	29.66	50	22.39	14.59	22.6	21.37	19.89	16.67
gene18485	LOC106047829	protein Wnt-4-like	1.61	0.95	1.08	0.08	0.08	0.32	0.09	0.69	0.35
gene18589	ELAVL2	ELAV like neuron-specific RNA binding protein 2, transcript variant X1	2.68	0.02	0.52	0.06	0.03	0.06	0.09	0.28	0.13
gene18607	NT5C3B	5'-nucleotidase, cytosolic IIIB	100.21	64.63	113.67	43.24	55.16	30.79	40.32	34.21	40.37
gene1863	KCNK1	potassium channel, two pore domain subfamily K, member 1, transcript variant X1	7.41	8.18	12.6	2.89	2.54	0.76	2.13	2.38	5.92
gene1971	LOC106029463	cytochrome P450 1B1	25.2	59.07	97.17	4.15	6.55	22.99	28.4	12.23	10.03
gene20034	LOC106049534	uncharacterized LOC106049534	2.74	1.32	2.41	0.16	0.23	0.26	0.64	0.39	0.91
gene20219	LOC106049723	uncharacterized LOC106049723	58.68	20.22	53.04	15.14	2.35	3.41	6.5	6.11	13.41
gene2074	LOC106029795	uncharacterized LOC106029795, transcript variant X1	1.8	1.29	0.64	0	0.09	0.1	0.21	0	0.44
gene2286	TTN	titin	52.61	22.51	25.31	11.29	21.07	5.4	34.83	4.53	9.09
gene3012	OCIAD2	OCIA domain containing 2, transcript variant X4	13.7	11.77	5.41	2.39	1.78	3.61	2.46	2.68	5.76
gene3330	LOC106031138	uncharacterized LOC106031138	5.14	3.52	4.72	1.09	1.93	2.38	2.37	1.13	3.44
gene3488	LOC106031282	vacuolar protein sorting-associated protein 29-like	9.69	10.43	3.47	2.16	1.84	3.26	2.38	1.77	6.08
gene3490	LOC106031281	uncharacterized LOC106031281, transcript variant X2	4.26	3.58	0.85	0.44	0	0.24	0.71	0.28	1.12
gene3637	HAAO	3-hydroxyanthranilate 3,4-dioxygenase	3.11	1.76	2.03	0.27	0.42	0.84	0.91	0.51	1.78
gene4270	CHTF18	chromosome transmission fidelity factor 18	8.67	8.55	11.59	3.64	3.8	5.26	5.85	6.39	6.19
gene5110	LOC106033066	uncharacterized protein C1orf228 homolog, transcript variant X2	3.63	6.9	5.6	1.1	3.12	1.01	0.58	1.43	5.75
gene5308	LOC106033162	proteoglycan 4-like	2.9	2.71	3.83	1.37	1.61	2.2	1.53	1.5	1.56
gene5533	MICALL2	MICAL-like 2	23.46	17.47	29.23	5.78	6.89	12.29	8.78	10.47	14.58
gene5718	CRABP1	cellular retinoic acid binding protein 1, transcript variant X2	55.33	116.64	350.82	29.56	32.93	37.99	25.88	76.68	10.3
gene5969	COLGALT2	collagen beta(1-O)galactosyltransferase 2, transcript variant X4	5.17	6.49	6.89	1.7	2.88	2.41	3.35	2.41	3.66
gene6281	AFAP1L1	actin filament associated protein 1-like 1, transcript variant X1	31.56	21.93	32.42	11.87	16.74	19.53	8.25	15.05	11.08
gene6496	ADAP2	ArfGAP with dual PH domains 2, transcript variant X1	27.86	12.44	15.4	5.1	8.92	10.58	14.25	8.87	9.26
gene6535	LOC106034733	nucleoside diphosphate kinase-like, transcript variant X3	3.16	2.46	2.12	0.78	0.93	2.09	0.54	0.81	1.18
gene6619	TEN1	TEN1 CST complex subunit, transcript variant X1	5.64	3.07	3.12	1.06	2.61	1.82	1.22	1.57	0.86
gene7019	LOC106035226	uncharacterized LOC106035226	4.18	2.16	1.25	0.01	0.22	0.03	0.1	0.17	0.18
gene7384	SETD9	SET domain containing 9	7.99	5.14	5.97	3.14	6.03	3.71	4.2	2.29	2.65
gene7585	MCM5	minichromosome maintenance complex component 5	25.15	23.15	26.67	8.33	9.88	4.72	8.55	11.9	17.87
gene7683	LOC106035954	iroquois-class homeodomain protein irx-2-like	36.59	23.07	56.5	17.72	14.64	24.32	17.01	4.27	11.77
gene7706	MSANTD3	Myb/SANT-like DNA-binding domain containing 3, transcript variant X2	2.83	3.75	2.85	0.91	1.15	1.52	1.93	1.39	1.5
gene7951	FAM124B	family with sequence similarity 124B, transcript variant X1	16.6	12.72	17.46	5.01	5.2	9.55	5.66	7.84	8.6
gene8732	NDOR1	NADPH dependent diflavin oxidoreductase 1	42.74	150.82	100.47	40.76	28.71	34.01	36.58	35.6	20.64
gene8897	SLC14A2	solute carrier family 14 (urea transporter), member 2	2.77	2.75	3.62	0.74	1.35	1.29	1.4	1.86	1.97
gene8984	CD40LG	CD40 ligand, transcript variant X1	41.54	39.62	20.85	10.46	7.99	6.58	11.93	5.28	27.13
gene923	LOC106038263	lymphotactin-like	31.74	19.08	22.07	1.88	2.87	2.68	7.95	3.38	11.31
gene9466	LOC106037890	myotubularin-related protein 9-like	13	12.04	10.97	3.09	4.52	5.99	5.49	4.61	9.13
gene9585	HMCES	5-hydroxymethylcytosine (hmC) binding, ES cell-specific	56.14	63.08	41	22.78	20.14	12.49	20.72	12.25	46.25
gene9711	SLC25A27	solute carrier family 25, member 27	2.46	2.14	1.79	0.52	0.69	1.3	0.85	0.63	0.88
gene9868	LOC106038377	C-C chemokine receptor type 8-like, transcript variant X2	5.69	2.97	0.73	1.16	0.62	0.62	0.67	0.54	1.52

## Sheet: 6profile
Gene.id	symbol	Gene_description	D1201	D1202	D1203	D3001	D3002	D3003	D701	D702	D703
gene10017	LOC106038594	ligand of Numb protein X 2-like, transcript variant X1	8.8	3.43	7.71	5.01	7.72	11.37	2.69	5.2	2.2
gene10048	CAPN6	calpain 6, transcript variant X6	55.25	119.3	46.14	114.59	76.12	142.07	17.67	20.96	11.35
gene10259	PAX9	paired box 9, transcript variant X2	9.53	7.79	17.25	13.06	7.42	13.31	5.89	5.18	5.83
gene10317	ANGEL1	angel homolog 1 (Drosophila), transcript variant X1	12.69	12.58	12.19	14.09	13.79	18.88	4.72	4.74	7.21
gene10326	NGB	neuroglobin	11.43	15.13	5.72	18.42	11.44	4.23	0.32	0.97	1.93
gene10328	GSTZ1	glutathione S-transferase zeta 1, transcript variant X1	18.21	23.56	18.82	33.53	26.78	14.33	13.12	6.79	11.14
gene10330	LOC106038866	uncharacterized LOC106038866	1.76	1.93	3.46	3.15	2.97	2.03	1.24	1.13	0.9
gene10335	ISM2	isthmin 2, transcript variant X1	2.54	1.57	1.14	1.01	0.95	0.69	0.22	0.52	0.55
gene10451	LOC106038984	uncharacterized LOC106038984	0.22	0.17	0.24	0.08	0.45	0.18	0.03	0	0
gene10594	LOC106039209	chromosome unknown open reading frame, human C3orf70, transcript variant X3	18.96	21.34	21	29.1	15	12.11	11.18	8.73	8.91
gene10640	D2HGDH	D-2-hydroxyglutarate dehydrogenase	9.18	9.14	5.97	8.43	8.27	12.26	2.78	4.09	7.08
gene10690	GPC1	glypican 1, transcript variant X1	41.72	76.16	35.96	39.14	57.03	65.89	16.42	24.95	27.32
gene10754	LYPD1	LY6/PLAUR domain containing 1	8.2	2.57	7.76	9.25	3	2.44	0.9	0.81	1.32
gene10834	LRRC39	leucine rich repeat containing 39, transcript variant X1	2.74	0.65	0.44	0.06	1.76	2.53	0.21	0.19	0
gene10861	SLC44A3	solute carrier family 44, member 3	10.91	9.24	8.63	9.56	11.3	10.61	3.3	3.34	3.71
gene11163	LOC106039720	chromosome unknown open reading frame, human C11orf52	17.38	9.72	15.01	20.22	10.44	11.41	2.19	2.89	1.95
gene11311	MC4R	melanocortin 4 receptor	0.35	0.88	1.11	0.75	1.14	2.34	0	0	0.13
gene11350	HECW2	HECT, C2 and WW domain containing E3 ubiquitin protein ligase 2, transcript variant X5	8.15	7.4	4.34	5.98	8.02	9.87	2.19	4.41	4.46
gene11544	TNFRSF8	tumor necrosis factor receptor superfamily, member 8, transcript variant X1	15.4	17.83	8.19	8.37	14.84	19.22	4.25	4.38	11.89
gene11550	NPPC	natriuretic peptide C	7.76	272.96	26.91	348.68	25.12	486.46	11.22	3.66	1.28
gene11699	FGF9	fibroblast growth factor 9	0.24	1.8	0.3	0.84	0.31	2.89	0.2	0.07	0.07
gene11771	CHRNB3	cholinergic receptor, nicotinic, beta 3 (neuronal)	0.44	0.16	0.88	1.29	0.57	0.14	0.03	0.03	0.18
gene11803	MOV10L1	Mov10 RISC complex RNA helicase like 1, transcript variant X1	5.65	0.04	6.96	0	7.49	0	0.02	0.04	0.02
gene11804	MLC1	megalencephalic leukoencephalopathy with subcortical cysts 1, transcript variant X1	0.15	0.75	0.16	0.22	1.08	0.23	0	0.06	0.06
gene11831	LOC106040543	uncharacterized LOC106040543	0.53	0.17	1.25	0.9	1.48	0.55	0.04	0.16	0.18
gene11941	LOC106040568	uncharacterized LOC106040568	2.97	1.82	1.5	3.26	0.89	0.1	0.08	0.53	0.35
gene12283	FZD9	frizzled class receptor 9	33.74	11.21	27.51	36.35	30.53	24.38	8.94	11.56	14.8
gene12305	LOC106041090	caspase-1-like	35.57	23.55	21.04	20.84	36.25	18.3	6.6	11.9	19.92
gene12528	LOC106041272	chromosome unknown open reading frame, human C1orf74	11.97	8.3	12.5	16	16.84	13.79	5.34	1.43	2.34
gene12532	G0S2	G0/G1 switch 2	823.78	544.43	1038.9	759.83	865.97	588.4	262.42	278.21	570.41
gene12635	LOC106041489	merlin-like, transcript variant X2	7.47	4.36	9.84	4.95	4.53	7.91	3.94	2.67	2.61
gene12640	TMEM132E	transmembrane protein 132E	2.07	4.2	4.29	4.37	5.14	2.52	0.2	1.59	0.97
gene12802	LOC106041532	dimethylaniline monooxygenase [N-oxide-forming] 4-like, transcript variant X1	4.51	4.38	6	5	6.23	8.71	0.91	2.69	3.08
gene12808	METTL11B	methyltransferase like 11B, transcript variant X4	4.67	1.48	2.07	2.92	0.57	1.59	0.27	1.54	0.49
gene132	CXCL12	chemokine (C-X-C motif) ligand 12	82.85	144.49	75.02	65.98	75.78	151.09	26.94	53.6	52.88
gene13228	CCNB1	cyclin B1	13.85	11.24	30.43	28.91	7.74	14.9	3.67	5.16	8.72
gene13479	SLCO2B1	solute carrier organic anion transporter family, member 2B1, transcript variant X1	62.2	45.45	38.7	42.23	46	46.64	16.58	12.7	25.58
gene13512	DGAT2	diacylglycerol O-acyltransferase 2	1056.88	382.53	450.48	426.11	415.07	330.75	84.71	34.01	246.78
gene14101	KIAA1958	KIAA1958 ortholog	0.49	0.41	0.24	0.4	0.62	0.33	0.06	0.06	0.19
gene14157	SLC7A6OS	solute carrier family 7, member 6 opposite strand	20.71	19.93	18.37	21.51	23.75	15.75	8.3	7.67	14.01
gene14372	GADL1	glutamate decarboxylase-like 1	0.85	0.41	1.81	3.77	1.3	0.77	0.29	0.07	0.04
gene14596	RAVER2	ribonucleoprotein, PTB-binding 2, transcript variant X1	9.94	11.11	16.89	17.72	12.51	13.15	8.81	7.43	4.31
gene1460	TP53I11	tumor protein p53 inducible protein 11	164.34	156.45	64.39	42.43	116.1	76.31	23.35	28.95	62.43
gene14706	LOC106043702	uncharacterized LOC106043702	0.18	0.21	0.03	0.06	0.26	0.48	0.02	0	0.03
gene14989	EPHA5	EPH receptor A5, transcript variant X1	5.99	7.46	2.07	4.2	5.8	5.23	1.49	3.52	2.45
gene15107	CACFD1	calcium channel flower domain containing 1	1.9	3.49	2.21	0.9	1.58	2.07	0.86	0.7	0.54
gene15274	SLC2A5	solute carrier family 2 (facilitated glucose/fructose transporter), member 5, transcript variant X2	4.97	2.15	2.79	3.06	2.47	1.09	0.65	0.48	0.65
gene15334	TMEM170B	transmembrane protein 170B	1.39	1.59	3.91	1.19	2.25	2.33	0.7	1.09	0.48
gene15380	LOC106044418	uncharacterized LOC106044418	4.6	6.66	5.12	5.16	8.01	7.71	2.9	1.81	2.66
gene15458	FAM228B	family with sequence similarity 228, member B, transcript variant X1	2.11	1.22	1.06	2.76	1.54	2.05	0.11	0.48	0.48
gene15511	FRMD1	FERM domain containing 1, transcript variant X1	5.09	1.75	4.71	4.51	5.51	2.83	1.47	1.44	1.15
gene15571	CFAP74	cilia and flagella associated protein 74, transcript variant X1	3.08	2.69	1.91	2.3	2.64	3.26	0.91	0.79	1.21
gene16048	SDC3	syndecan 3	66.3	52.79	46.64	42.91	35.12	139.36	7.66	20.39	24.44
gene16053	FABP3	fatty acid binding protein 3, muscle and heart	403.92	243.53	209.52	338.34	325.22	126.22	55.8	83.88	107.66
gene1619	LOC106046243	cytochrome P450 2D20	14.65	7.36	9.29	11.19	10.4	11.63	4.37	2.09	6.01
gene16309	CEP78	centrosomal protein 78kDa, transcript variant X2	23.87	14.19	19.37	11.44	24.11	30.96	11.11	10.06	11.36
gene16553	GTF2E1	general transcription factor IIE, polypeptide 1, alpha 56kDa	22.65	22.64	24.82	30.69	25.22	27.26	13.58	11.03	15.97
gene16575	RPH3AL	rabphilin 3A-like (without C2 domains), transcript variant X5	4.05	5.12	4.41	2.72	3.21	5.74	1.17	1.92	2.09
gene16576	FAM101B	family with sequence similarity 101, member B	134.62	105.81	74.07	110.16	138.48	136.89	20.78	44.56	54.37
gene16654	MDFI	MyoD family inhibitor	12.41	2.86	9.79	7.36	11.24	10.68	1.06	1.01	1.12
gene16663	ADORA1	adenosine A1 receptor	24.18	8.89	28.87	27.74	25.8	24.42	5.83	14.85	11.57
gene16689	LOC106045839	receptor-type tyrosine-protein phosphatase V-like	27.88	21.53	28.67	27.08	16.87	19.55	17.17	8.76	7.63
gene16856	PPP1R3B	protein phosphatase 1, regulatory subunit 3B	26.35	12.73	16.28	28.51	22.1	12.36	10.55	7.79	12.92
gene16862	LOC106046101	uncharacterized LOC106046101, transcript variant X1	8.1	2.54	4.29	2.62	11.29	0.34	0.59	0.77	0.31
gene1693	TBC1D15	TBC1 domain family, member 15	32.42	26.94	31.36	32.35	36.11	38.37	17.34	15.29	20.67
gene17051	LOC106046304	chromosome unknown open reading frame, human C12orf4, transcript variant X1	23.22	22.96	17.03	20.97	27.41	26.68	9.94	12.79	12.76
gene17059	LOC106046298	C-type lectin domain family 2 member L-like, transcript variant X2	32.5	37.38	31.09	20.33	23.88	43.03	12.92	16.73	18.15
gene17060	LOC106046296	C-type lectin domain family 2 member L-like, transcript variant X1	54.28	67.94	57.52	34.22	44.59	78.37	27.29	25.38	30.97
gene17168	MCF2L	MCF.2 cell line derived transforming sequence-like, transcript variant X1	99.05	62.68	63.17	34.07	83.83	133.33	29.12	21.58	46.49
gene17205	LOC106046470	ATPase family AAA domain-containing protein 2-like, transcript variant X1	2.23	4.88	3.23	2.6	2.97	3.63	1.66	0.39	0.78
gene17229	JPH3	junctophilin 3	3.58	2.75	5.5	4.27	5.18	4.14	1.21	0.85	1.81
gene17479	GCGR	glucagon receptor	54.11	26.9	40.82	39.7	44.02	28.5	22.95	14.68	19.17
gene17540	LOC106046849	uncharacterized LOC106046849, transcript variant X14	5.84	2.71	7.35	8.7	8.61	4.03	1.28	2.14	1.62
gene17596	LOC106046904	acid-sensing ion channel 2-like	10.15	3.6	11.68	12.09	4.17	1.05	2.63	3.39	3.28
gene17618	FZD2	frizzled class receptor 2	23.14	22.86	28.14	28.43	35.06	26.68	17.82	7.16	12.48
gene17636	ADAM11	ADAM metallopeptidase domain 11	0.35	0.38	5.17	2.03	1.16	0.96	0.09	0.39	0.39
gene18084	CPEB1	cytoplasmic polyadenylation element binding protein 1, transcript variant X1	11.18	10.12	12.98	10.62	11.06	7.43	3.04	2.87	1.61
gene18192	ALKBH8	alkB homolog 8, tRNA methyltransferase, transcript variant X2	7.83	5.04	6.01	5.43	6.29	6.67	2.97	2.81	2.82
gene18312	P2RY14	purinergic receptor P2Y, G-protein coupled, 14	2.35	0.99	1.12	0.83	0.25	0.25	0	0	0.33
gene18351	GPD1	glycerol-3-phosphate dehydrogenase 1 (soluble)	72.3	23.25	31.48	67.26	36.77	55.98	3.75	1.99	19.25
gene18358	TMPRSS12	transmembrane (C-terminal) protease, serine 12, transcript variant X1	1.72	0.58	2.32	1.38	1	1.74	0.75	0.55	0.89
gene18389	SNTA1	syntrophin, alpha 1	75.75	47.94	75.1	52.99	51.86	43.4	32.71	36.61	19.4
gene18391	NECAB3	N-terminal EF-hand calcium binding protein 3	7.08	6.97	8.78	9.6	8.18	8.34	3.09	2.15	5.01
gene18496	SCNN1A	sodium channel, non voltage gated 1 alpha subunit	25.81	18.05	28.36	9.43	14.61	62.09	7.04	11.08	12.12
gene1854	MAP10	microtubule-associated protein 10	3.03	1.9	2.89	2.49	3.29	3.89	0.83	0.98	0.79
gene18617	ZNF385C	zinc finger protein 385C, transcript variant X3	8.52	4.79	8.15	8.25	7.17	4.74	3.36	3.57	3.38
gene18663	LOC106048033	uncharacterized LOC106048033, transcript variant X1	2.32	0.66	0.72	2.41	1.84	1.92	0.29	0.13	0.18
gene18846	LOC106048260	aldehyde dehydrogenase family 3 member B1-like	16.44	4.58	14.58	25.87	9.83	7.35	6.23	3.47	2.7
gene19011	KCNA2	potassium channel, voltage gated shaker related subfamily A, member 2, transcript variant X2	0.44	0.69	0.98	0.61	0.88	0.85	0.18	0.03	0.13
gene1913	MAP1LC3C	microtubule-associated protein 1 light chain 3 gamma	0.82	2.55	2.86	1.76	2.45	4.55	0.3	0.69	0.25
gene19268	LETMD1	LETM1 domain containing 1	19.22	12.26	13	15.56	17.69	14.02	5.05	8.55	9.93
gene19296	NRBP2	nuclear receptor binding protein 2, transcript variant X1	21.65	12.91	19.11	13	20.54	22.39	6.78	11.21	9.49
gene19334	DUSP3	dual specificity phosphatase 3	31.35	14.46	25.26	20.06	32.2	30.85	6.95	10.31	16.78
gene19388	NEFM	neurofilament, medium polypeptide	4.91	23.06	15.04	6.2	9.45	8.44	0.92	1	0.89
gene19389	NEFL	neurofilament, light polypeptide	6.11	36.89	27.21	13	17.83	11.75	1.55	6.53	1.99
gene1942	SRD5A2	steroid-5-alpha-reductase, alpha polypeptide 2 (3-oxo-5 alpha-steroid delta 4-dehydrogenase alpha 2), transcript variant X1	46.31	55.99	84.11	11.87	59.11	102.83	28.63	24.85	15.34
gene19504	LOC106048966	brevican core protein-like	2.05	0.28	0.8	3.68	4.59	1.54	0.06	0	0
gene19543	GPR182	G protein-coupled receptor 182	4.16	4.56	7.91	3.25	3.28	9.48	1.29	2.56	1.65
gene19553	SMARCD3	SWI/SNF related, matrix associated, actin dependent regulator of chromatin, subfamily d, member 3, transcript variant X1	12.94	7.82	11.19	7.34	12.07	15.63	6.13	5.09	5.56
gene19573	HORMAD2	HORMA domain containing 2, transcript variant X4	1.1	1.05	0.99	0.96	1.38	1.34	0.36	0.22	0.77
gene19688	SLC46A1	solute carrier family 46 (folate transporter), member 1	13.43	12.15	16.77	8.72	11.11	11.78	3.37	2.5	6.84
gene1973	RMDN2	regulator of microtubule dynamics 2, transcript variant X5	8.06	8.37	10.33	9.35	9.4	17.37	3.18	3.08	4.89
gene19851	CLDN10	claudin 10	3.66	5.85	5.34	6.29	6.23	7.48	1.01	2.13	0.85
gene199	LOC106029971	uncharacterized LOC106029971, transcript variant X1	54.35	108.26	45.77	67.77	80.24	92.29	24.92	27.85	36.46
gene20004	LOC106049496	PR domain zinc finger protein 5-like, transcript variant X3	10.07	7.92	5.88	7.61	8.62	5.33	2	5.95	3.39
gene20027	EPHX2	epoxide hydrolase 2, cytoplasmic	24.78	2.38	8.47	10.08	18.68	6.72	3.03	1.66	5.38
gene20056	LOC106049556	activated RNA polymerase II transcriptional coactivator p15-like	12.27	12.05	11.17	16.41	12.17	18.39	6.91	4.1	5.29
gene20591	LOC106029448	melanoma-associated antigen G1-like	66.24	43.92	52.71	53.43	28.98	41.97	14.39	37.39	20.35
gene2105	ADCY5	adenylate cyclase 5, transcript variant X1	11.13	7.07	12.81	9.77	11.9	15.43	2.94	7.33	5.08
gene2216	METTL8	methyltransferase like 8, transcript variant X2	6.28	4.45	7.06	6.17	7.19	7.78	2.53	3.13	3.28
gene2441	LOC106030229	uncharacterized LOC106030229, transcript variant X1	3.89	4.66	5.56	2.45	3.75	4.92	1.52	1.66	2.95
gene2469	SCRN1	secernin 1, transcript variant X2	2.36	2.97	2.22	2.03	6.86	1.94	0.3	0.83	1.35
gene2476	LOC106030252	uncharacterized LOC106030252	0.26	0.2	0.02	0.05	0.23	0.24	0	0.02	0.03
gene2523	OXSM	3-oxoacyl-ACP synthase, mitochondrial, transcript variant X1	5.86	5.57	6.02	6.94	6.22	5.53	3.86	1.86	2.39
gene2557	SKIDA1	SKI/DACH domain containing 1	0.83	0.98	0.84	1.06	0.9	1.51	0.43	0.23	0.45
gene2637	BAG2	BCL2-associated athanogene 2	46.46	106.19	116.84	121.39	92.69	40.01	24.65	33.35	8.76
gene2665	LOC106030435	glutathione S-transferase 3	98.98	101.56	236.16	124.73	147.72	120.66	76.5	59.79	51.67
gene2666	LOC106030436	glutathione S-transferase-like, transcript variant X2	134.38	161.67	213.2	194.02	259.02	183.29	50.51	97.21	97.38
gene2719	TP53INP1	tumor protein p53 inducible nuclear protein 1, transcript variant X1	61.25	41.98	48.53	53.39	63.17	55.89	22.52	17.9	40.51
gene2802	LOC106030656	fatty acid-binding protein, adipocyte-like	17612.1	11193.9	17290.2	18038.6	17243.8	33227.6	2614.8	2349.88	7692.46
gene2927	IAH1	isoamyl acetate-hydrolyzing esterase 1 homolog, transcript variant X1	36	28.82	30.16	25.88	33.93	18.91	16.98	15.44	11.66
gene2985	KCTD8	potassium channel tetramerization domain containing 8	1.2	0.44	2.2	1.2	2.4	0.51	0.22	0	0
gene3054	CREBL2	cAMP responsive element binding protein-like 2	84.83	49.07	80.55	82.9	107.61	67.9	46.72	23.2	48.57
gene3268	UNG	uracil DNA glycosylase	75.09	55.05	52.15	41.07	51.21	37.98	14.47	15.37	32.64
gene3291	TMEM116	transmembrane protein 116	33.43	29.94	37.11	34.53	43.82	22.87	12.05	15.93	13.65
gene3517	GGT1	gamma-glutamyltransferase 1, transcript variant X1	1.57	1.65	1.65	1.5	1.22	2.98	0.46	0.77	0.28
gene3518	LRRC75B	leucine rich repeat containing 75B	6.59	32.78	18.56	26.45	18.19	18.88	0.97	1.34	1.17
gene3658	LOC106031513	uncharacterized LOC106031513	2.3	16.13	3.24	7.83	4.45	5.4	3.6	1.71	1.78
gene3664	HHAT	hedgehog acyltransferase, transcript variant X1	6.3	8.41	4.68	5.29	6.58	8.2	3.66	2.29	3.05
gene3828	SCG5	secretogranin V	4.19	4.56	15.52	15	6.36	10.55	4.68	3.09	1.76
gene3866	DTD2	D-tyrosyl-tRNA deacylase 2 (putative), transcript variant X1	20.03	18.87	41.9	15.4	24.24	22.14	16.2	9.24	6.47
gene405	FAM213A	family with sequence similarity 213, member A, transcript variant X1	1773.14	396.86	1297.78	2084.92	1555.23	884	343.67	372.58	511.94
gene4068	ZBBX	zinc finger, B-box domain containing	0.88	0.77	0.14	0.75	0.4	1.45	0.23	0.16	0
gene4186	LOC106032071	cytochrome P450 3A8-like	17.24	8.34	4.8	10.15	13.57	7.67	6.86	4.12	4.64
gene4355	DCHS2	dachsous cadherin-related 2, transcript variant X1	0.09	0.09	0.83	0.67	0.58	0.04	0.12	0.1	0.07
gene4361	RBM46	RNA binding motif protein 46, transcript variant X3	0.12	0.86	0.53	0.13	1.01	0.79	0.03	0	0.03
gene4364	NPY2R	neuropeptide Y receptor Y2	8.94	13.24	6.87	7.13	10.16	26.85	3.92	1.74	3.59
gene4385	FAM198B	family with sequence similarity 198, member B	45.14	58.64	40.87	48.94	57.02	68.51	29.04	30.21	23.46
gene4584	FAM26E	family with sequence similarity 26, member E	4.72	3.78	1.8	2.56	3.41	6.1	2.08	1.32	1.78
gene4714	LOC106032731	uncharacterized LOC106032731, transcript variant X1	0.91	0.77	0.42	0.29	1.26	1.15	0.07	0.25	0.23
gene4715	LOC106032733	uncharacterized LOC106032733	0.69	0.45	0.13	0.14	1.04	1.29	0	0	0.07
gene4729	LOC106032884	uncharacterized LOC106032884, transcript variant X3	0.47	0.37	0.22	0.2	0.38	0.8	0.08	0.13	0.12
gene4803	KLHL3	kelch-like family member 3	8.48	10.54	5.76	3.61	8.1	7.64	2.74	3.61	4
gene4973	PRKAA2	protein kinase, AMP-activated, alpha 2 catalytic subunit, transcript variant X1	5.96	3.78	5.66	6.6	5.39	7.5	2.24	1.98	1.84
gene5015	GPX7	glutathione peroxidase 7, transcript variant X2	11.58	21.99	19.64	26.56	15.43	20.08	15.76	8.71	5.3
gene5174	EXOC3L1	exocyst complex component 3-like 1	17.77	13.28	10.33	13.4	17.58	19.41	5.44	8.88	7.41
gene524	FAM53A	family with sequence similarity 53, member A, transcript variant X2	93.49	56.16	79.28	78.73	61.41	52.19	26.82	25.49	50.94
gene530	FGFR3	fibroblast growth factor receptor 3, transcript variant X4	9.62	2.68	5.39	6.47	8.64	5.3	1.41	1.85	3.14
gene5309	GCSH	glycine cleavage system protein H (aminomethyl carrier)	7.83	9.04	11.85	10.8	11.01	10.1	2.9	4.97	0.86
gene5351	SBK1	SH3 domain binding kinase 1	7.08	1.93	6.99	8.11	5.8	5.12	0.53	1.81	1.61
gene5508	NPTX2	neuronal pentraxin II	15.46	2.94	15.28	16.87	14.95	16.36	1.32	1.18	2.62
gene5711	DAPK2	death-associated protein kinase 2	4.58	2.75	5.63	8.13	5.84	3.52	1.38	0.7	0.9
gene576	ACOX3	acyl-CoA oxidase 3, pristanoyl, transcript variant X3	9.48	4.32	7.21	5.44	6.99	8.73	3.58	3.16	3.21
gene5769	LUZP2	leucine zipper protein 2, transcript variant X1	0.79	2.38	1.82	1.87	0.99	2.71	0.65	0.82	0.18
gene5831	LOC106033848	NADH-cytochrome b5 reductase 2	71.66	23.03	51.08	34.69	73.06	88.34	15.33	20.67	19.89
gene6282	ABLIM3	actin binding LIM protein family, member 3, transcript variant X1	6.77	6.32	12.54	6.83	8.09	9.81	4.44	4.8	3.2
gene6388	ZNF804A	zinc finger protein 804A	1.19	0.33	0.67	0.81	0.88	0.41	0.07	0.12	0.42
gene6504	LOC106034712	uncharacterized LOC106034712	21.53	5.76	20.28	7.39	17.1	17.88	5.64	6.74	6.62
gene6563	NAT9	N-acetyltransferase 9 (GCN5-related, putative), transcript variant X1	25.44	15.93	21.21	18.23	18.31	23.74	6.67	5.43	7.31
gene6587	ARMC7	armadillo repeat containing 7	25.95	20.62	26.42	21.07	37.33	28.23	14.61	12.61	8.52
gene6869	SLC25A30	solute carrier family 25, member 30, transcript variant X1	5.6	2.85	5.66	3.05	2.58	2.99	1.38	1.12	2.25
gene6929	POMK	protein-O-mannose kinase	40.52	27.98	38.85	49.37	38.34	36.12	19.57	20.82	16.79
gene6985	ACSL1	acyl-CoA synthetase long-chain family member 1, transcript variant X1	247.25	110.91	144.9	126.94	126	143.71	31.72	28.32	86.35
gene6992	ENPP6	ectonucleotide pyrophosphatase/phosphodiesterase 6	12.75	32.73	6.28	25.34	21.31	16.55	9.7	2.77	10.99
gene7316	GNAI1	guanine nucleotide binding protein (G protein), alpha inhibiting activity polypeptide 1, transcript variant X1	121.06	76.61	102.34	56.87	77.56	108.75	41.4	36.23	60.26
gene7366	ESM1	endothelial cell-specific molecule 1	7.34	4.24	0.88	2.22	3.59	7.03	2.34	1.97	1.34
gene7411	RNF180	ring finger protein 180, transcript variant X1	3.49	2.99	2.92	3.44	4.89	5.75	1.02	0.99	1.01
gene7477	GTPBP6	GTP binding protein 6 (putative)	8.67	4.17	6.86	3.44	10.77	6.89	3.63	2.38	2.98
gene7503	LOC106035756	arylsulfatase D-like, transcript variant X1	1.55	4.54	3.98	3.49	4.65	1.5	0.12	0.06	0.66
gene756	GSC	goosecoid homeobox	28.89	22.27	56.09	32.8	38.34	25.4	13.58	10.74	9.05
gene759	LOC106033756	alpha-1-antitrypsin-like	0	0.68	2.53	1.09	2.02	0.52	0.04	0.23	0.1
gene760	LOC106036374	alpha-1-antitrypsin-like, transcript variant X2	0.65	0.35	2.18	0.75	1.12	0.46	0.11	0.11	0.11
gene7604	KCTD17	potassium channel tetramerization domain containing 17, transcript variant X1	10.11	4.33	9.99	10.04	9	6.43	1.98	3.25	3.18
gene7892	LOC106036203	chromosome unknown open reading frame, human C3orf58	24.19	9.97	11.54	11.83	12.02	25.08	7.84	5.38	10.72
gene8042	RXFP3	relaxin/insulin-like family peptide receptor 3	3.54	23.23	5.5	11.47	16.28	3.53	0.01	0.06	0.54
gene8087	LOC106036430	ras-related and estrogen-regulated growth inhibitor-like protein	14.75	11.29	6.68	6.08	11.68	19.77	0.97	7.91	5.01
gene8118	SV2B	synaptic vesicle glycoprotein 2B	0.43	14.22	0.85	10.31	15.64	9.34	0.41	0.73	0.08
gene8127	RGMA	repulsive guidance molecule family member a	43.62	23.32	36.99	22.47	31.74	19.27	12.85	8.96	19.83
gene8234	ROPN1L	rhophilin associated tail protein 1-like, transcript variant X2	54.89	12.83	35.01	66.83	43.2	39.35	10.43	4.3	15.92
gene8458	ZBTB47	zinc finger and BTB domain containing 47	31.88	50.99	41.42	50.99	49.79	55.82	32.7	19.6	12.29
gene8506	XYLB	xylulokinase homolog (H. influenzae), transcript variant X1	9.14	9.43	15.93	11.93	9.84	13.97	3.83	5.43	5.97
gene8604	TMEM140	transmembrane protein 140, transcript variant X1	86.49	53.62	85.63	61.11	116.45	83	29.4	25.95	55.76
gene8762	DPP7	dipeptidyl-peptidase 7	166.57	88.42	190.17	201.42	167.73	127.08	65.05	61.11	66.22
gene8763	LOC106037125	kelch-like protein 13	3.7	1.53	4.7	2.07	4.1	4.33	1.05	1.17	1.16
gene8786	RTN1	reticulon 1, transcript variant X1	14.86	18.74	12.65	18.64	14.76	29.29	4.34	8.1	6.05
gene8861	LOC106037166	chromosome unknown open reading frame, human C14orf180	12.8	4.47	2.28	6.73	6.73	6.48	1.41	1.62	0.81
gene888	KIAA1407	KIAA1407 ortholog	3.69	3.18	3.96	4.23	4.08	5.51	1.4	1.74	1.58
gene9021	AGTR2	angiotensin II receptor, type 2, transcript variant X3	24.73	19.57	22.97	17.6	29.19	39.41	14.68	7.44	11.29
gene9089	SDHAF3	succinate dehydrogenase complex assembly factor 3	37.3	26.01	20.98	27.27	20.8	24.81	14.84	12.34	11.17
gene9214	LOC106037776	uncharacterized LOC106037776	1.88	0.45	2.18	1.24	0.7	0.55	0.06	0.14	0.34
gene930	LOC106037084	transcription termination factor 2-like	13.8	17.95	14.78	17.84	21.62	14.3	9.33	7.71	9.52
gene9323	ASB9	ankyrin repeat and SOCS box containing 9	10.31	9.83	15.8	7.81	8.32	18.29	4.78	4.04	6.8
gene9704	CLIC5	chloride intracellular channel 5, transcript variant X1	5.72	3.37	4.57	6.19	5.65	3	2.36	1.95	1.15
gene9710	LOC106038153	24-hydroxycholesterol 7-alpha-hydroxylase, transcript variant X2	2.86	3.49	2.67	2.09	3.55	5.15	0.79	1.05	1.7
gene9718	ADGRF5	adhesion G protein-coupled receptor F5, transcript variant X1	18.36	18.63	12.61	7.31	11.32	24.07	1.89	2.81	6.33
gene9769	LOC106038244	patatin-like phospholipase domain-containing protein 2, transcript variant X1	70.76	10.32	19.05	28.35	35.2	35.14	9.12	13.4	19.21
gene9798	LOC106038238	uncharacterized LOC106038238, transcript variant X1	3.73	3.09	2.93	1.79	3.4	4.63	2.02	1.01	1.87
gene9951	FAM84B	family with sequence similarity 84, member B	25.88	25.99	19.41	17.55	14.49	23.86	8.42	7.34	16.98
gene9973	ATAD2	ATPase family, AAA domain containing 2, transcript variant X1	13.31	10.28	11.68	11.5	15	15.22	5.97	6.8	7.18
gene9991	DEPTOR	DEP domain containing MTOR-interacting protein	15.8	14.75	20.3	11.14	20.06	26.41	5.54	5.37	10.87

## Sheet: 7profile
Gene.id	symbol	Gene_description	D1201	D1202	D1203	D3001	D3002	D3003	D701	D702	D703
gene10022	LOC106038521	wiskott-Aldrich syndrome protein family member 3-like	3.58	0.72	1.66	16.66	12.94	4.27	0.22	0.2	0.76
gene10065	LOC106038582	synaptotagmin-like protein 2, transcript variant X2	6.83	2.4	5.32	4.94	6.94	8.3	1.44	4.02	2.19
gene10071	SMARCA1	SWI/SNF related, matrix associated, actin dependent regulator of chromatin, subfamily a, member 1	25	25.33	16.92	36.33	36.44	41.61	21.6	13.52	19
gene10093	LOC106038686	PR domain zinc finger protein 5-like, transcript variant X1	6.52	3.13	3.76	5.33	7.51	6.23	2.93	1.2	2.34
gene10203	PLXNA4	plexin A4, transcript variant X1	0.77	3.54	1.13	6.87	1.89	2.13	0.92	0.95	0.83
gene10224	LOC106038729	transmembrane protein 110-like	6.64	6.54	14.07	17.39	7.95	18.72	2.94	3.27	2.48
gene10225	ITIH5	inter-alpha-trypsin inhibitor heavy chain family, member 5	67.77	32.6	47.76	85.95	82.08	78.65	33.81	30.93	31.22
gene1031	NSUN3	NOP2/Sun domain family, member 3, transcript variant X1	9.36	4.57	6.87	9.47	10.69	10.81	5.18	4.89	3.59
gene10324	ZDHHC22	zinc finger, DHHC-type containing 22	0.1	0.73	0.3	4.13	2.46	0.9	0	0.1	0.05
gene10348	INSIG1	insulin induced gene 1	66.3	32.39	43.18	91.68	119.12	49.8	18.02	19.35	31.22
gene10428	CTBP2	C-terminal binding protein 2	26.22	22.4	15.3	24.92	22.73	39.81	9.41	14.01	16.35
gene10429	TEX36	testis expressed 36	3.65	8.72	10.02	46.4	46.7	25.11	4.58	1.4	2.23
gene10450	LOC106039008	uncharacterized LOC106039008, transcript variant X1	3.35	4.63	17.44	30.88	16.17	26.99	2.5	0.52	6.71
gene10454	EBF3	early B-cell factor 3, transcript variant X4	8.52	6.19	11.51	15.97	24.2	18.88	7.27	4.01	6.39
gene10492	LOC106039069	uncharacterized LOC106039069, transcript variant X2	1.12	1.35	1.01	0.31	1.1	5.11	0.45	0.26	0.92
gene10493	FAM110B	family with sequence similarity 110, member B, transcript variant X5	16.9	13.1	20.5	23.18	25.39	31.06	8.83	7.77	6.8
gene10501	CA8	carbonic anhydrase VIII	2.18	2.97	1.62	5.67	3.03	6.72	1.05	0.63	1.13
gene10513	TTPA	tocopherol (alpha) transfer protein, transcript variant X1	19.1	4.39	19.97	19.44	41.07	32.74	3.8	2.38	16.42
gene1056	MAEL	maelstrom spermatogenic transposon silencer, transcript variant X1	1.01	0.69	0.32	0.2	2.88	2.18	0.23	0.4	0.65
gene10566	RFC1	replication factor C (activator 1) 1, 145kDa, transcript variant X1	29.77	28.66	21.43	34.55	41.99	36.92	13.08	16.49	25.96
gene10569	LIAS	lipoic acid synthetase	56.98	33.13	48.75	81.63	78.67	62.82	30.84	28.99	31.6
gene10588	PCCB	propionyl CoA carboxylase, beta polypeptide	70.19	66.31	70.34	127	107.78	111.96	61.18	45.1	61.46
gene10595	EHHADH	enoyl-CoA, hydratase/3-hydroxyacyl CoA dehydrogenase, transcript variant X3	10.39	6.09	10.44	19.52	16.79	17.24	3.06	2.52	5.63
gene10626	TF	transferrin, transcript variant X1	2223.24	3516.44	2994.35	6123.34	4669.43	4181.89	556.7	2677.5	1961.04
gene10631	CEP19	centrosomal protein 19kDa, transcript variant X3	3.31	1.41	5.01	5.9	4.42	2.96	2.13	2.07	1.45
gene10674	ARHGEF4	Rho guanine nucleotide exchange factor (GEF) 4, transcript variant X1	11.28	6.13	10.14	14.56	10.73	13.93	4.32	3.77	3.92
gene10692	LOC106039185	uncharacterized LOC106039185, transcript variant X2	0.13	0.25	0.08	0.53	0.37	0.22	0.03	0	0.12
gene10721	ATP13A4	ATPase type 13A4, transcript variant X7	0.12	0.36	0.13	0.3	0.6	0.27	0.06	0.15	0.06
gene10723	HRASLS	HRAS-like suppressor, transcript variant X1	9.05	3.24	3.2	12.34	12.5	9.78	2.04	1.08	2.75
gene10726	NXPH2	neurexophilin 2	10.6	2.05	6.22	9.73	11.88	8.58	2.2	7.9	1.52
gene10750	NCKAP5	NCK-associated protein 5, transcript variant X4	0.88	0.81	0.5	1.93	1.69	3.24	0.26	0.27	0.33
gene10758	DPP10	dipeptidyl-peptidase 10 (non-functional)	0.94	3.5	1.1	3.36	4.11	3.28	1.27	1.1	0.68
gene10808	PLCD4	phospholipase C, delta 4	4.04	0.38	1.09	6.47	6.8	3.53	0.84	0.74	1.18
gene10823	LOC106039415	uncharacterized oxidoreductase ZK1290.5-like, transcript variant X1	8.97	7.77	7.73	10.31	12.48	12.88	5	2.36	3.18
gene10842	FRRS1	ferric-chelate reductase 1, transcript variant X4	2.27	1.16	1.28	1.9	2.83	3.35	0.97	1.2	1.14
gene10846	LOC106039426	lipid phosphate phosphatase-related protein type 5	6.45	4.27	6.25	18.67	8.74	9.05	0.87	1.22	1.56
gene10892	EPHX4	epoxide hydrolase 4	51.34	21.09	53.44	96.3	88.18	50.93	26.64	14.26	16.4
gene10893	BRDT	bromodomain, testis-specific, transcript variant X1	0.3	0.15	0.45	1.09	0.39	0.31	0.06	0.21	0.06
gene10976	ZNF423	zinc finger protein 423, transcript variant X1	36.31	40.35	28.67	51.04	63.56	53.64	20.56	33.05	28.8
gene11054	RUNDC3B	RUN domain containing 3B	0.87	0.7	1.16	0.9	1.62	1.72	0.73	0.74	0.59
gene11064	STEAP1	six transmembrane epithelial antigen of the prostate 1, transcript variant X2	20.96	10.11	7.19	27.36	26.24	30.48	5.7	7.65	5.65
gene11065	STEAP2	STEAP family member 2, metalloreductase, transcript variant X1	44.06	20.19	12.67	63.78	47.05	42.57	14.16	15.51	16.32
gene11070	LOC106039682	pituitary tumor-transforming gene 1 protein-interacting protein-like	223.24	234.6	231.45	334.52	257.26	315.28	169.91	161.14	110.22
gene11107	LOC106039699	neurabin-1-like, transcript variant X1	5.46	4.14	2.68	12.74	12.42	12.22	1.58	2.26	3.01
gene11135	C1QTNF5	C1q and tumor necrosis factor related protein 5	15.06	18.48	16.41	31.54	34.18	29.1	17.39	14.07	7.45
gene11154	LAYN	layilin, transcript variant X1	11.14	13.36	12.74	18.64	21.21	17.75	11.96	6.43	5.91
gene11155	SIK2	salt-inducible kinase 2	37.05	18.52	31.54	45.48	40.04	34.58	11.31	18.01	23.94
gene11164	DIXDC1	DIX domain containing 1, transcript variant X1	20.28	7.87	11.65	24.47	29.04	24.11	7.69	7.17	6.98
gene11263	TENM4	teneurin transmembrane protein 4, transcript variant X4	2.04	6.76	2.3	14.41	6.63	11.83	2.82	2.12	1.93
gene11315	RNF152	ring finger protein 152, transcript variant X7	11.39	3.78	12.39	26.05	23.51	11.96	1.47	1.41	3.21
gene11355	PGAP1	post-GPI attachment to proteins 1	2.11	1.53	0.58	1.64	1.95	1.87	0.66	0.75	1.29
gene11358	COQ10B	coenzyme Q10B	16.78	12.84	16.28	35.06	32.84	18.83	13.48	10.64	10.14
gene11441	PTPDC1	protein tyrosine phosphatase domain containing 1, transcript variant X1	4.76	1.72	4.96	7.94	8.86	7.18	2.52	3	1.79
gene11478	ARHGEF10L	Rho guanine nucleotide exchange factor (GEF) 10-like	28.32	14.06	19.28	27.6	33.44	37.77	18.45	11.52	12.5
gene11510	RNF186	ring finger protein 186, transcript variant X1	1.19	0.92	1.53	2.63	3.18	1.61	0.93	0.36	0.23
gene11535	LOC106040129	arylacetamide deacetylase-like 4	5.55	10.32	5.2	21.98	27.8	9.46	3.67	5.15	2.49
gene11536	LOC106040130	arylacetamide deacetylase-like 4	0.59	7.09	1.76	41.85	19.39	5.64	0.22	0.72	0.23
gene11553	MTHFR	methylenetetrahydrofolate reductase (NAD(P)H), transcript variant X1	33.83	79.55	29.68	108.2	42.99	77.6	27.46	19.18	33.29
gene11608	CLSTN2	calsyntenin 2	18.3	5.82	12.7	93.96	69.76	20.5	3.1	6.48	8.81
gene11687	TNFRSF19	tumor necrosis factor receptor superfamily, member 19, transcript variant X3	13.25	4.22	6.85	7.93	15.69	16.26	2.35	4.9	2.58
gene11688	LOC106040364	uncharacterized LOC106040364	0.54	0	0.55	5.65	1.73	0.73	0	0.21	0
gene117	SLC16A12	solute carrier family 16, member 12, transcript variant X1	1.73	2.57	3.89	7.73	5.06	6.03	1.6	1.03	2.15
gene11700	LOC106040380	uncharacterized LOC106040380	1.43	0.07	0.79	1.7	1.65	1.6	0.33	0.18	0.2
gene11749	ZNF462	zinc finger protein 462	16.89	12.42	12.01	16.2	18.41	34.15	8.21	5.8	5.89
gene1175	FITM2	fat storage-inducing transmembrane protein 2, transcript variant X1	44.03	14.29	22.47	45.96	28.07	40.9	6.2	13.08	13.94
gene1176	GDAP1L1	ganglioside induced differentiation associated protein 1-like 1	12.11	3.49	9.55	14.69	15.55	7.13	2.04	2.96	4.45
gene11773	IDUA	iduronidase, alpha-L-, transcript variant X1	16.86	17.92	20.73	21.21	20.87	29.42	11.53	10.7	12.06
gene11778	TMEM175	transmembrane protein 175	18.14	10.98	16.21	21.75	21.35	20.88	7.33	9.91	6.8
gene11832	ANOS1	anosmin 1, transcript variant X1	4.15	1.71	7.31	7.92	16	6.61	0.9	1.03	2.11
gene1185	SLC2A10	solute carrier family 2 (facilitated glucose transporter), member 10, transcript variant X1	4.34	7.62	8.55	17.16	13.89	11.82	6.19	2.52	2.94
gene1187	EYA2	EYA transcriptional coactivator and phosphatase 2, transcript variant X1	1.98	1.89	3.55	11.88	16.05	22.62	1.24	0.45	1.19
gene11872	ESAM	endothelial cell adhesion molecule	55.35	36.76	45.29	45.01	61.84	99.43	16.13	51.1	21.1
gene11875	ROBO4	roundabout guidance receptor 4, transcript variant X1	6.9	5.93	4.39	6.27	9.33	13.81	1.51	4.66	1.64
gene11879	PKNOX2	PBX/knotted 1 homeobox 2	7.48	6.08	6.47	12.09	10.26	7.11	3.97	5.33	3.38
gene11899	ARHGAP32	Rho GTPase activating protein 32, transcript variant X2	8.02	10.37	5.79	15.06	18.18	13.75	4.26	4.37	3.58
gene11901	BARX2	BARX homeobox 2, transcript variant X1	22.19	6.66	28.09	38.74	42.47	10.61	12.6	7.89	6.58
gene11914	LOC106040545	uncharacterized LOC106040545	0.55	0.89	0.46	1.03	0.63	0.9	0.33	0.28	0.51
gene1192	SULF2	sulfatase 2, transcript variant X5	51.9	72.72	54.16	101.49	81.45	124.49	50.53	57.02	37.53
gene1201	LOC106040595	somatomedin-B and thrombospondin type-1 domain-containing protein-like	3.75	5.21	4.52	7.82	10.44	8.13	3.11	3.44	2.7
gene12031	PBX3	pre-B-cell leukemia homeobox 3, transcript variant X1	9.05	9.7	6.77	12.46	14.81	10.82	6.45	3.48	5.45
gene12184	TUB	tubby bipartite transcription factor, transcript variant X1	35.29	29.48	25.4	37.54	38.55	45.53	13.81	15.91	16.24
gene12185	RIC3	RIC3 acetylcholine receptor chaperone	8.63	8.73	6.35	34.12	30.42	23.87	3.27	3.38	2.68
gene1222	KCNG1	potassium channel, voltage gated modifier subfamily G, member 1, transcript variant X2	3.27	1.95	4.1	6.38	6.9	7.45	1.98	0.82	0.79
gene12306	ABHD11	abhydrolase domain containing 11	11.49	5.62	10.22	5.5	13.64	17.4	6.06	6	4.94
gene12310	WBSCR27	Williams Beuren syndrome chromosome region 27	9.58	3.98	12.32	42.78	21.71	6.79	4.6	6.27	4.86
gene12336	GATSL2	GATS protein-like 2, transcript variant X1	8.3	9.96	8.43	15.52	14.37	13.94	10.03	4.76	4.13
gene12341	GTF2I	general transcription factor IIi, transcript variant X1	30.06	19.16	19.26	26.86	32.05	35.57	14.83	13.71	17.56
gene12342	GTF2IRD1	GTF2I repeat domain containing 1, transcript variant X1	11.02	5.16	6.36	12.99	13.54	7.68	4.84	4.92	5.07
gene12371	KATNAL1	katanin p60 subunit A-like 1, transcript variant X2	3.13	2.05	3.38	4.13	5.85	5.73	2.55	2.25	1.78
gene12372	LOC106041153	uncharacterized LOC106041153, transcript variant X3	1.09	1.66	1.16	3.39	2.64	2.7	0.98	0.43	0.66
gene12383	B3GLCT	beta 3-glucosyltransferase	23.74	16.32	48.85	34.54	80.22	32.12	13.7	10.89	12.29
gene12386	FRY	furry homolog (Drosophila), transcript variant X1	6.24	3.09	3.45	9.54	10.91	13.74	1.87	3.78	2.12
gene12387	LOC106041128	uncharacterized LOC106041128	1.42	0	0.47	0.9	1.24	2.29	0.13	0	0.14
gene12391	N4BP2L2	NEDD4 binding protein 2-like 2	5.2	4.17	5.82	8.72	10.41	11.08	2.82	2.35	2.68
gene12427	GRIN2A	glutamate receptor, ionotropic, N-methyl D-aspartate 2A, transcript variant X1	0.13	0.33	0.16	0.27	0.39	0.25	0.12	0.11	0.09
gene12430	LOC106041208	uncharacterized LOC106041208, transcript variant X3	4.47	2.65	6.23	10.74	7.25	3.35	2.62	2.19	2.07
gene12518	FAM212B	family with sequence similarity 212, member B	7.64	5.11	7.04	28.87	25.47	12.36	1.85	6.32	3.48
gene12531	LOC106041294	corticosteroid 11-beta-dehydrogenase isozyme 1-like	1.6	0.85	3.96	6.64	7.03	1.53	0.72	0.72	0.73
gene12545	LOC106041378	chromosome unknown open reading frame, human C1orf116, transcript variant X1	10.76	3.71	6.11	9.08	15.81	9.89	6.13	3.39	2.57
gene12569	PM20D1	peptidase M20 domain containing 1	34.23	16.14	30.33	58.61	59.39	44.9	10.9	8.52	10.65
gene12586	NFASC	neurofascin, transcript variant X4	8.25	1.8	4.32	6.34	17.95	12.53	0.55	3.98	2.16
gene12651	RASL10B	RAS-like, family 10, member B	25.04	8.3	28.76	49.57	34.4	30.96	3.95	2.61	9.07
gene12680	COL26A1	collagen, type XXVI, alpha 1, transcript variant X1	2.65	5.69	2.63	8.71	13.64	9.6	2.39	3.33	1.26
gene12709	LOC106041524	uncharacterized LOC106041524	0.54	0.43	1.36	0.54	1.93	2.99	0.43	0.08	0.43
gene12772	SEC22B	SEC22 vesicle trafficking protein homolog B (S. cerevisiae)	105.76	97.78	109.64	176.81	136.18	129.6	68.33	53.33	72.36
gene12794	PIGC	phosphatidylinositol glycan anchor biosynthesis, class C	26.73	16.06	21.33	38.25	47.36	28.38	13.58	11.47	18.66
gene12803	FMO3	flavin containing monooxygenase 3, transcript variant X2	138.39	69.33	210.82	343.01	201.77	154.3	13.05	95.98	57.44
gene12815	RXRG	retinoid X receptor, gamma, transcript variant X1	32.78	10.16	34.5	48.41	39.09	29.36	6.02	14.6	11.27
gene12821	GCC2	GRIP and coiled-coil domain containing 2	23.32	13.79	18.91	37.59	46.64	31.4	10.13	13.65	14.2
gene12831	LOC106041631	chromosome unknown open reading frame, human C2orf40	42.82	157.36	85.45	165	179.9	103.55	82.36	52.06	65.98
gene12861	CREG2	cellular repressor of E1A-stimulated genes 2	8.26	2.38	5.11	10.28	12.88	7.11	0.95	1.09	2.49
gene12882	TPMT	thiopurine S-methyltransferase	54.71	43.65	54.03	75.27	65.17	68.63	37.82	36.49	28
gene12883	NHLRC1	NHL repeat containing E3 ubiquitin protein ligase 1	8.02	5.92	8.04	13.13	13.79	11.07	4.75	3.63	4.24
gene12990	MYRIP	myosin VIIA and Rab interacting protein, transcript variant X1	7.68	8.34	6.28	7.66	8.97	16.01	2.94	5.15	4.88
gene13013	ARPP21	cAMP-regulated phosphoprotein, 21kDa, transcript variant X2	0.49	0.12	0.25	0.66	0.62	0.88	0.13	0	0.03
gene13022	FAM175A	family with sequence similarity 175, member A, transcript variant X5	51.4	69.81	64.81	64.98	120.7	138.99	44.82	41.09	40.03
gene13049	NUDT9	nudix (nucleoside diphosphate linked moiety X)-type motif 9	25.51	18.81	14.81	27.18	33.83	27.82	15.25	11.51	12.2
gene13054	DMP1	dentin matrix acidic phosphoprotein 1	1.84	3.19	1.49	4.41	5.88	4.2	1.34	2.13	0.77
gene1308	LOC106042281	desumoylating isopeptidase 2-like, transcript variant X4	4.13	3.92	4.17	7.4	6.7	7.29	2.96	3.42	2.62
gene13138	LOC106041955	uncharacterized LOC106041955	1.67	0.43	0.85	1.61	1.35	1.42	0.82	0.49	0.2
gene13149	PRKAR2B	protein kinase, cAMP-dependent, regulatory, type II, beta, transcript variant X1	110.68	34.15	93.75	151.56	192.75	108.86	34.54	58.01	61.65
gene13169	KIF21A	kinesin family member 21A	12.95	6.97	10.97	9.96	15.19	15.14	3.97	6.12	6.49
gene13170	LOC106042005	sucrase-isomaltase, intestinal-like	0.24	0.11	0.12	0.39	1.67	0.31	0.13	0	0.07
gene13178	LOC106042035	-	3.91	2.22	3.88	5.02	4.93	3.33	1.66	2.12	2.01
gene13186	LSMEM1	leucine-rich single-pass membrane protein 1	9.89	2.01	7.59	20.6	9.19	6.89	2.5	1.16	7.25
gene13239	DMGDH	dimethylglycine dehydrogenase	1.36	2.12	1.64	3.82	2.62	1.73	1.59	0.92	0.62
gene13295	TMEM47	transmembrane protein 47	44.64	28.77	28.81	40.2	45.02	72.77	13.99	20.14	30.64
gene13345	CCDC102B	coiled-coil domain containing 102B, transcript variant X3	15.43	16.72	17.83	26.81	35.75	26.69	11.19	6.75	5.82
gene13409	ACYP2	acylphosphatase 2, muscle type, transcript variant X4	11.17	6.82	12.01	16.31	14.91	16.7	12.54	5.43	5.26
gene1341	PTGR2	prostaglandin reductase 2, transcript variant X2	25.99	14.13	18.4	26.04	28.28	29.78	11.59	11.49	11.77
gene13451	EPB41L4A	erythrocyte membrane protein band 4.1 like 4A	9.69	4.14	7.09	8.25	10.57	16.72	4.5	6.25	4.47
gene13457	CAMK4	calcium/calmodulin-dependent protein kinase IV, transcript variant X1	2.71	3.63	3.72	4.27	5.15	5.65	2.57	2.51	1.8
gene13485	CHRDL2	chordin-like 2	19.76	3.49	5.69	8.34	30	20.39	0.38	0.59	6.37
gene13508	GDPD5	glycerophosphodiester phosphodiesterase domain containing 5	40.24	16.47	24.14	43.45	61.69	29.37	23.74	13.7	15.06
gene13513	UVRAG	UV radiation resistance associated	23.31	14.67	16.11	30.75	30.09	26.18	11.79	11.76	17.73
gene13515	WNT11	wingless-type MMTV integration site family, member 11	6.43	5.81	18.41	24.83	20.37	15.75	3.62	0.98	1.37
gene13554	ANKRD50	ankyrin repeat domain 50	20.43	18.61	13.6	24.85	37.64	27.69	11.98	13.67	12.77
gene13633	LOC106042532	ADAMTS-like protein 2, transcript variant X1	1.26	0.39	1.3	1.33	1.97	0.97	0.39	0.87	0.41
gene13687	LOC106042589	uncharacterized LOC106042589	0.36	0.39	0.28	0.44	0.49	0.69	0.3	0.1	0.17
gene13688	IGSF22	immunoglobulin superfamily, member 22	22.81	10.95	10.35	15.94	21.22	23.06	3.54	3.59	14.06
gene13743	NRP1	neuropilin 1	111.97	65.11	94.98	139.97	143.36	120.67	49.45	59.74	66.82
gene13813	ATP6AP1L	ATPase, H+ transporting, lysosomal accessory protein 1-like, transcript variant X2	0.6	1.38	3.29	7.34	5.62	1.45	0	0.96	0.14
gene13835	PSD2	pleckstrin and Sec7 domain containing 2, transcript variant X1	7.87	5.22	3.91	4.02	19.71	4.42	0.8	1.68	5.57
gene1386	EXD1	exonuclease 3'-5' domain containing 1, transcript variant X1	5.17	2.13	2.29	5.28	5.21	4.59	0.92	1.7	1.96
gene13891	SMIM4	small integral membrane protein 4	35.38	20.11	32.39	31.06	31.35	53.1	20.64	23.25	12.11
gene13911	LOC106042848	6-phosphofructo-2-kinase/fructose-2,6-bisphosphatase 4, transcript variant X2	32.9	19.25	27.35	43.31	45.66	52.02	12.55	11.87	20.59
gene14022	KANK1	KN motif and ankyrin repeat domains 1, transcript variant X2	16.75	19.64	14.51	35.46	26.78	22.21	11.69	15.55	9.54
gene14082	DACH2	dachshund family transcription factor 2, transcript variant X1	9.66	7.53	6.15	10.58	16.76	7.57	1.53	5.04	5.92
gene14089	GRIN3A	glutamate receptor, ionotropic, N-methyl-D-aspartate 3A	5.36	1.17	6.15	13.56	5.25	6.2	0.38	0.32	1.95
gene1416	CREB3L1	cAMP responsive element binding protein 3-like 1, transcript variant X1	38.09	123.03	65.43	206.67	127.61	102.37	72.59	40.71	33.51
gene14185	LOC106043083	uncharacterized LOC106043083, transcript variant X3	1.27	0.85	1.35	3	3.32	3.21	0.82	0.66	0.64
gene14209	STON1	stonin 1, transcript variant X1	10.9	5.4	6.61	9.22	17.68	15.93	6.09	5.79	6.08
gene1427	LRP4	low density lipoprotein receptor-related protein 4, transcript variant X2	7.75	12.93	5.35	6.47	13.65	17.99	2.8	4.67	5.2
gene14279	MAB21L1	mab-21-like 1 (C. elegans)	3.55	6.17	4.59	17.07	15.83	12.16	4.63	0.8	1.7
gene14309	LOC106043289	uncharacterized LOC106043289, transcript variant X1	0.01	0.11	0	0.33	0.32	0.13	0.04	0	0
gene14367	CMTM7	CKLF-like MARVEL transmembrane domain containing 7, transcript variant X1	72.45	75.89	64.1	155.96	125.18	99.13	58.72	29.04	63.36
gene14379	LOC106043339	WD repeat-containing protein 93-like	0.38	0.78	0.78	0.78	3.97	1.33	0.36	0.42	0.42
gene14409	LOC106043362	lamin-L(III)-like, transcript variant X1	1.47	1.64	1.49	1.46	3.06	3.5	0.52	0.1	0.63
gene14455	CRYZL1	crystallin, zeta (quinone reductase)-like 1, transcript variant X1	8.68	4.74	6.53	7.3	10.88	12.72	5.41	4.79	4.56
gene14495	PTPRT	protein tyrosine phosphatase, receptor type, T, transcript variant X1	1.6	0.32	0.77	2.05	2.58	0.44	0.29	0.75	0.54
gene1461	TSPAN18	tetraspanin 18, transcript variant X12	95.88	49.3	63.55	98.17	110.96	77.84	29.25	58.34	33.17
gene14619	LOC106043624	methylcrotonoyl-CoA carboxylase beta chain, mitochondrial-like, transcript variant X1	2.76	2.36	3.07	1.75	5.39	7.03	1.49	1.55	1.98
gene14638	ERICH3	glutamate-rich 3	20.42	8.61	18.15	67.86	57.94	32.12	3.5	4.38	7.73
gene1467	ALKBH3	alkB homolog 3, alpha-ketoglutarate-dependent dioxygenase	16.44	12.69	14.99	21.56	19.08	24.97	8.01	11.13	6.44
gene14684	LOC106043657	uncharacterized LOC106043657	0.31	0.29	0.44	2.61	1.77	1.44	0.12	0.15	0.06
gene14861	BPHL	biphenyl hydrolase-like (serine hydrolase)	30.57	22.59	34.71	62.88	49.14	29.06	25.57	18.18	11.22
gene14884	CCDC148	coiled-coil domain containing 148, transcript variant X1	2.65	4.51	4.24	4.28	8.46	6.66	4.51	2.11	1.58
gene14924	CLN5	ceroid-lipofuscinosis, neuronal 5	20.61	13.02	12.3	18.09	22.09	21.53	7.28	7.75	10.8
gene14941	CCNI	cyclin I, transcript variant X1	184.21	155.06	165.65	308.03	342.27	180.88	145.07	81.69	159.68
gene14944	LOC106043950	16 kDa beta-galactoside-binding lectin	19.14	21.8	10.65	25.68	39.1	42.92	13.42	8.41	7.16
gene1504	CAT	catalase	93.4	49.92	77.33	146.47	177.91	93.2	32.92	22.24	40.87
gene15065	AIF1L	allograft inflammatory factor 1-like	186.27	185.47	209.34	384.93	313.39	317.56	135.13	129.7	57.26
gene15194	LOC106044188	cytochrome P450 1A4-like	0.09	0.08	0.4	5.46	0.65	0.33	0	0.1	0.1
gene15219	BBS4	Bardet-Biedl syndrome 4, transcript variant X5	6.79	6.99	7.27	9.05	11.29	9	4.49	3.93	5.32
gene15295	PEX14	peroxisomal biogenesis factor 14	25.1	16.98	24.38	32.01	34.68	28.89	14.42	14.74	14.41
gene15301	EEPD1	endonuclease/exonuclease/phosphatase family domain containing 1	52.39	19.03	37.34	77.81	72.15	53.55	18.83	16.28	35.48
gene15302	KIAA0895	KIAA0895 ortholog, transcript variant X1	2.58	1.98	2.14	3.72	6.77	5.78	1.62	1.23	1.12
gene15338	PLAT	plasminogen activator, tissue, transcript variant X1	20.05	16.93	15.29	24.47	27.64	29.16	10.86	14.8	12.69
gene15360	LETM2	leucine zipper-EF-hand containing transmembrane protein 2, transcript variant X1	3.86	2.28	5.85	12.72	4.35	13.61	3.68	2.99	1.78
gene15387	DUSP26	dual specificity phosphatase 26 (putative)	2.12	3.12	10.84	3.05	23.55	8.15	1.65	1	0.25
gene15388	RNF122	ring finger protein 122, transcript variant X1	5.91	3.41	9.65	9.86	11.29	7.96	4.08	4.77	3.7
gene15422	LOC106044472	protein prune homolog 2, transcript variant X3	1.09	7.51	2.45	12.1	10.98	6.05	1.01	2.63	2.28
gene15470	KCND2	potassium channel, voltage gated Shal related subfamily D, member 2	0.15	0.03	0	0.49	0.7	0.35	0.04	0	0
gene15475	CPED1	cadherin-like and PC-esterase domain containing 1, transcript variant X1	8.94	5.61	9.96	14.78	13.83	16.7	6.45	2.71	4.57
gene15509	KIF25	kinesin family member 25, transcript variant X1	4.18	1.77	5.01	5.55	8.19	4.03	1.73	0.36	2.05
gene15518	SMOC2	SPARC related modular calcium binding 2, transcript variant X1	17.11	48.43	55.42	64.57	81.73	60.57	57.78	11.5	19.19
gene15519	THBS2	thrombospondin 2, transcript variant X1	125.94	442.63	197.57	837	579.75	574.17	77.3	47.45	67.98
gene15520	LOC106044568	uncharacterized LOC106044568	0.04	0.46	0.13	0.33	0.27	0.94	0.05	0	0.05
gene15533	TRIM67	tripartite motif containing 67, transcript variant X1	0.98	0.48	0.58	1.91	0.94	0.25	0.21	0.34	0.29
gene15538	AGT	angiotensinogen (serpin peptidase inhibitor, clade A, member 8), transcript variant X1	24.44	5.14	18.3	33.66	26.16	15.69	3.65	3.84	11.36
gene15549	LOC106044608	uncharacterized LOC106044608	15.15	15.24	21.35	34.14	48.03	23.13	16.25	6.9	9.98
gene15560	LOC106044648	Golgi integral membrane protein 4-like, transcript variant X1	47.83	35.6	50.14	62.28	65.02	50.31	37.41	26.37	24.46
gene15569	LOC106044613	uncharacterized LOC106044613, transcript variant X1	1.84	0.92	0.77	2.06	2.31	2.73	0.72	1.36	0.53
gene15586	MMEL1	membrane metallo-endopeptidase-like 1, transcript variant X2	0.21	0.46	0.38	0.44	1.2	1.24	0.08	0.16	0.07
gene15634	LOC106044703	uncharacterized LOC106044703, transcript variant X4	0.07	0.08	0.09	0.1	0.43	0.43	0.05	0.03	0.06
gene15650	LOC106044698	uncharacterized LOC106044698, transcript variant X4	74.96	24	54.58	61.7	79.8	48.11	39.79	38.3	16.25
gene1568	LOC106045117	histone H3-like	37.66	25.3	46.7	67.44	47.04	37.85	18.21	31.53	17.65
gene15683	LOC106044772	cystatin-like	11071	2670.74	10871.5	26625	20393.4	9559.24	2442.08	3059.78	3905.64
gene1574	LOC106045879	uncharacterized LOC106045879	1.32	0.52	1.91	3.14	6.15	10.91	0.78	0.65	0.49
gene15757	P3H2	prolyl 3-hydroxylase 2	12.59	3.2	5.94	13.77	15.63	8.35	4.2	4.45	2.68
gene158	LOC106048153	neuropeptide Y receptor type 4-like	10.55	2.17	7.11	32.73	20.94	17.84	0.62	0.98	3.8
gene1581	LOC106045886	histone H1.01	69.46	59.09	66.59	206.26	177.49	140.22	43.96	36.65	46.06
gene15860	SIN3B	SIN3 transcription regulator family member B	45.71	49.96	36.58	61.58	82.61	70.31	33.38	31.82	34.35
gene15897	LOC106044932	perilipin-3-like	1064.66	261.54	1097.86	3909.86	2427.24	873.17	149.49	108.07	344.83
gene15933	CCDC127	coiled-coil domain containing 127	17.35	13.38	15.27	26.73	28	25.61	10.57	12	11.81
gene15943	MOCOS	molybdenum cofactor sulfurase, transcript variant X1	10.01	7.13	7.88	11.99	17.1	22.52	7.46	4.96	4.3
gene15968	TMEM43	transmembrane protein 43	51.15	21.17	36.92	109.95	119.95	71.14	26.91	22.46	23.8
gene15977	SLC41A3	solute carrier family 41, member 3, transcript variant X4	16.6	12.26	13.66	20.64	19.61	18.52	7.38	7.87	9.16
gene16029	LOC106045149	connective tissue growth factor-like, transcript variant X10	73.06	8.03	42.05	64.2	168.03	124.89	8.46	18.44	28.04
gene16086	ENHO	energy homeostasis associated	45.19	29.28	35.83	101.14	93.63	35.65	22.69	13.88	15.43
gene16124	HSPA12A	heat shock 70kDa protein 12A, transcript variant X1	5.21	4.78	3.6	4.22	6.55	12.22	2.21	2.09	2.09
gene1614	SERHL2	serine hydrolase-like 2, transcript variant X1	3.18	2.14	2.79	3.06	2.98	4.02	1.85	1.21	1.56
gene16170	LOC106045304	uncharacterized LOC106045304, transcript variant X1	0.14	0.14	0.16	0.05	0.35	0.54	0.05	0.03	0.1
gene16193	BDH2	3-hydroxybutyrate dehydrogenase, type 2, transcript variant X1	11.25	10.64	9.08	18.39	17.81	18.62	9.95	4.91	7.05
gene16291	GGT7	gamma-glutamyltransferase 7, transcript variant X1	2.92	3.34	2.19	6.89	5.67	4.29	0.86	2.21	2.07
gene16298	EPB41L1	erythrocyte membrane protein band 4.1-like 1, transcript variant X1	55.74	29.49	36.01	91.55	87.13	64.24	18.7	19.71	30.88
gene16306	LOC106045455	guanine nucleotide-binding protein subunit alpha-14, transcript variant X1	13.04	32.7	21.29	51.38	32.5	33.89	16.59	9.21	7.37
gene16342	FKBP9	FK506 binding protein 9, 63 kDa	159.04	313.18	217.36	502.27	489.97	501.56	189.13	201.04	116.54
gene16397	HEPH	hephaestin, transcript variant X1	12.65	11.75	9.69	34.67	30.01	18.99	7.16	8.21	6
gene16533	WARS2	tryptophanyl tRNA synthetase 2, mitochondrial, transcript variant X1	6.98	5.86	6.76	8.61	8.03	10.85	4.59	4.21	4.6
gene16535	SPAG17	sperm associated antigen 17, transcript variant X1	1.73	2.08	1.44	3.39	4.6	3.9	0.8	0.99	1.16
gene16578	FAM57A	family with sequence similarity 57, member A	79.24	18.77	39.97	117.53	111.74	59.11	34.19	24.96	37.85
gene16586	LOC106045763	fatty aldehyde dehydrogenase-like	211.53	104.61	174.55	455.68	372.19	229.47	130.53	59.92	112.79
gene16587	LOC106045817	fatty aldehyde dehydrogenase-like, transcript variant X1	81.21	56.98	71.42	162.68	132.38	81.96	81.26	30.02	47.21
gene16591	LOC106045796	uncharacterized LOC106045796	8.39	7.74	9.09	9.49	19.88	12.4	5.68	6.23	7.03
gene16635	OPTC	opticin, transcript variant X1	4.43	5.61	3.78	14.95	6.8	6.74	2.46	2.54	4.43
gene16636	PRELP	proline/arginine-rich end leucine-rich repeat protein	111.55	147.09	108.35	226.7	317.03	188.07	72.52	60.23	48.02
gene16658	LOC106045892	triggering receptor expressed on myeloid cells 2-like	36.59	19.92	32.52	49.44	69.48	32.11	18.76	10.12	32.47
gene16668	TMEM9	transmembrane protein 9, transcript variant X1	10.55	11.6	7.78	19.1	17.6	12.33	6.14	5.19	5.65
gene16682	IPO9	importin 9	41.66	25.56	26.94	49.06	56.93	56.42	17.83	23.17	22.94
gene16686	LGR6	leucine-rich repeat containing G protein-coupled receptor 6	2.22	8.71	0.85	27.45	20.51	14.76	0.34	0.83	0.21
gene16699	LOC106045932	uncharacterized LOC106045932	0.18	0.32	0	0.26	0.88	0.5	0.07	0	0
gene16708	PECR	peroxisomal trans-2-enoyl-CoA reductase, transcript variant X1	30.7	15.48	26.44	36.09	37.25	41.64	10.29	9.79	16.01
gene16709	TMEM169	transmembrane protein 169	4.98	2.12	3.69	3.61	6.3	7.46	1.73	2.41	1.48
gene16785	RAB26	RAB26, member RAS oncogene family	12.43	25.63	13.2	45.1	41.48	16.1	9.38	7.16	11.29
gene1684	CAPS2	calcyphosine 2, transcript variant X3	2.42	2.07	3.86	7.55	8.54	5.31	1.88	1.43	1.55
gene16864	HOPX	HOP homeobox, transcript variant X1	116.58	40.05	138.64	177.91	169.08	96.18	35.88	47.79	63.38
gene16896	LOC106046185	translocator protein-like	2.11	0.72	1.08	1.28	1.9	5.75	0.18	0.67	1.1
gene16932	TULP1	tubby like protein 1	0.5	0.87	0.45	7.67	3.47	1.22	0	0.28	0.28
gene16957	LOC106046179	receptor-type tyrosine-protein phosphatase V-like	15.5	16.25	11.47	29.25	22.1	19.13	9.35	5.84	6.8
gene16969	PHYH	phytanoyl-CoA 2-hydroxylase	43.1	28.69	39.41	51.83	70.74	40.59	23.47	17.1	21.18
gene16987	ZNF608	zinc finger protein 608	2.23	1.93	2.01	4.02	5.7	4.88	0.87	1.04	1.59
gene16992	CSNK1G3	casein kinase 1, gamma 3, transcript variant X2	0.93	0.8	1.21	1.63	2.56	2.06	0.69	0.73	0.34
gene16999	SNCAIP	synuclein, alpha interacting protein, transcript variant X1	13.45	13.92	11.16	20.08	26.85	17.12	5.29	8	7.27
gene170	LOC106049164	ATP-binding cassette sub-family G member 2-like	90.77	34.99	61.57	83.79	68.39	125.81	18.22	50.92	17.85
gene17037	LOC106046312	uncharacterized LOC106046312	3.51	2.83	1.07	6.39	11.16	2.95	2	1.17	1.33
gene17058	LOC106046297	killer cell lectin-like receptor subfamily F member 1, transcript variant X2	7.91	6.63	6.67	6.29	14.92	19.11	3.77	3	5.74
gene17063	STYK1	serine/threonine/tyrosine kinase 1, transcript variant X2	8.62	8.47	6.87	10.65	13.36	10.2	5.99	3.14	2.51
gene17078	PPL	periplakin	150.08	268.64	156.22	354.84	445.16	261.35	140.71	76.26	74.99
gene1710	BEST3	bestrophin 3	0.08	0.03	0.11	0.41	0.16	0.83	0	0.04	0
gene17125	GLDC	glycine dehydrogenase (decarboxylating)	2.22	1.85	1.33	1.72	4.09	3.37	0.5	2.07	0.66
gene172	SCD	stearoyl-CoA desaturase (delta-9-desaturase)	2385.05	385.54	1131.52	8986.44	3591.1	1635.96	391.02	540.17	517.77
gene17252	ACSF3	acyl-CoA synthetase family member 3, transcript variant X3	7.21	5.46	4.39	9.33	10.48	6.44	3.5	4.51	4.91
gene17255	SPG7	spastic paraplegia 7 (pure and complicated autosomal recessive)	39.15	27.08	33.23	38.69	42.55	42.29	17.61	17.87	22.81
gene17281	MCC	mutated in colorectal cancers, transcript variant X1	19.26	17.61	16.22	18.18	19.98	28.13	10.73	11.4	10.31
gene17364	FAM198A	family with sequence similarity 198, member A	14.01	21.02	35	41.88	47.8	50.01	23.02	9.24	7.35
gene17389	ACAD11	acyl-CoA dehydrogenase family, member 11	10.98	6.59	9.75	30.29	22.42	16.42	6.83	4.03	8.05
gene17397	GAB1	GRB2-associated binding protein 1	26.65	20.53	22.51	32.76	39.64	37.61	20.48	15.72	17.5
gene17498	FASN	fatty acid synthase	84.53	35.19	47.45	95.37	120.84	71.99	31.41	42.78	53.26
gene17531	PTH1R	parathyroid hormone 1 receptor, transcript variant X2	1.73	2.76	0.93	2.43	3.97	3.93	0.43	0.25	2.15
gene17556	CA4	carbonic anhydrase IV	5.54	10.36	4.39	4.01	4.14	27.11	1.42	1.71	7
gene17575	LYPD6B	LY6/PLAUR domain containing 6B, transcript variant X1	0.6	0.64	0.97	1.31	1.71	1.72	0.26	0.42	0.07
gene17620	MYO1D	myosin ID	16.34	8.6	17.96	51.57	42.47	24.95	3.73	9.86	10.79
gene1772	SLC16A7	solute carrier family 16 (monocarboxylate transporter), member 7	16.44	8.04	12.4	18.15	23.56	20.64	7.8	4.9	8.66
gene17741	LOC106047072	protein-L-isoaspartate(D-aspartate) O-methyltransferase-like, transcript variant X2	21.81	18.37	22.38	35.5	41.11	29.76	16.1	14.57	15.61
gene17753	LOC106047053	chromosome unknown open reading frame, human C15orf52, transcript variant X2	11.39	14.88	10.76	19.17	20.77	23.42	6.62	4.23	4.11
gene17763	EPS8L2	EPS8-like 2	24.47	14.8	18.56	35.17	31.13	50.11	13.3	15.39	10.18
gene17769	LOC106047052	uncharacterized LOC106047052	3.75	5.99	0.98	3.41	6.87	6.56	1.28	2.06	0.38
gene17780	FN3K	fructosamine 3 kinase, transcript variant X1	10.8	3.39	8.41	16.84	19.41	14.19	1.15	1.51	2.96
gene17807	DUSP15	dual specificity phosphatase 15, transcript variant X1	16.02	8.1	16.13	22.96	36.31	12.54	7.35	9.75	8.92
gene17808	TTLL9	tubulin tyrosine ligase-like family member 9, transcript variant X1	8.5	3.1	4.56	8.37	7.67	19.32	1.75	4.02	3.07
gene1781	LRIG3	leucine-rich repeats and immunoglobulin-like domains 3, transcript variant X1	15.84	10.12	16.01	17.87	22.97	20.17	10.41	6.56	11.71
gene17892	LOC106047241	chromosome unknown open reading frame, human C1orf174, transcript variant X1	13.45	10.75	15.04	18.32	15.22	20.32	13.79	4.68	7.29
gene1791	SLC38A4	solute carrier family 38, member 4, transcript variant X2	0.17	0.25	0.39	0.85	1.24	1.12	0.13	0.2	0.07
gene17947	SH3GLB2	SH3-domain GRB2-like endophilin B2, transcript variant X1	163.99	105.43	128.82	202.08	218.92	270.51	43.31	42.93	71.76
gene18016	ADGRL3	adhesion G protein-coupled receptor L3, transcript variant X1	6.95	3.07	5.87	13.87	13.33	7.01	1.97	2.81	5.11
gene1803	NELL2	neural EGFL like 2	148.25	25.13	86.51	413.19	278.76	112.2	14.69	9.41	58.88
gene18035	LOC106047378	uncharacterized LOC106047378, transcript variant X2	0.14	0.14	0.05	0.18	0.25	0.22	0.03	0.06	0.01
gene18040	LOC106047369	uncharacterized LOC106047369	7.88	13.57	11.42	9.39	23.16	23.54	6.99	3.97	6.47
gene18107	ALPK3	alpha-kinase 3	3.89	2.38	2.96	13.26	7.37	9.75	1.65	1.95	1.05
gene1814	PRICKLE1	prickle homolog 1, transcript variant X1	18.16	24.18	18.93	25.61	41.14	39.87	7.11	9.93	9.96
gene18140	ARHGEF9	Cdc42 guanine nucleotide exchange factor (GEF) 9, transcript variant X1	16.05	24.56	10.71	21.99	16.21	44.3	7.07	11.99	13.35
gene18174	TMLHE	trimethyllysine hydroxylase, epsilon	79.29	70.82	72.85	113.58	105.7	149.94	51.98	48.92	63.75
gene18177	LOC106047538	uncharacterized LOC106047538, transcript variant X2	0.22	0.25	0.38	0.22	0.46	1.1	0.06	0.2	0.09
gene1820	PDZRN4	PDZ domain containing ring finger 4, transcript variant X1	0.84	0.95	1.04	5.78	2.54	1.19	0.85	0.38	0.36
gene18210	MEF2C	myocyte enhancer factor 2C, transcript variant X9	35.82	24.88	23.26	31.39	42.51	39.88	16.33	11.31	28.67
gene18296	CDS2	CDP-diacylglycerol synthase (phosphatidate cytidylyltransferase) 2	114.34	45.46	74.41	162.65	152.9	115.59	28.18	27.53	48.53
gene18305	AADAC	arylacetamide deacetylase, transcript variant X1	48.8	15.69	47.22	83.84	86.6	45.63	8.66	6.01	20.15
gene18333	CP	ceruloplasmin (ferroxidase), transcript variant X1	5.94	7.79	4.35	22.42	25.17	21.08	2.26	2.14	3.92
gene18359	LOC106047730	methyltransferase-like protein 7A	6.33	4.78	9.26	20.27	14.03	13.89	1.12	1.02	5.06
gene18379	LOC106047761	uncharacterized LOC106047761, transcript variant X3	2	1.72	1.49	4.26	3.35	2.14	1.29	0.14	0.89
gene18390	CBFA2T2	core-binding factor, runt domain, alpha subunit 2; translocated to, 2	15.05	13.31	13.08	23.25	24.61	16.85	7.78	8.28	10.53
gene18456	LOC106047853	solute carrier family 25 member 33-like	12.46	11.09	16.33	19.84	20.24	21.35	8.92	8.12	7.84
gene1853	SIPA1L2	signal-induced proliferation-associated 1 like 2, transcript variant X1	14.31	7.52	8.64	13.91	18.24	14.51	6.13	5.49	8.53
gene1856	NTPCR	nucleoside-triphosphatase, cancer-related	83.35	53.37	83.19	93.01	119.89	91.6	39.21	33.67	30.48
gene18606	FKBP10	FK506 binding protein 10, 65 kDa, transcript variant X2	50.69	159	103.98	289.24	178.48	179.46	78.76	74.7	53.4
gene18637	EZH1	enhancer of zeste 1 polycomb repressive complex 2 subunit, transcript variant X1	22.91	25.39	22.28	31.17	48	40.15	14.1	14.04	22.14
gene18651	RAB30	RAB30, member RAS oncogene family	28.46	21.42	29.02	50.85	39.18	50.88	13.97	17.9	19.38
gene18661	FZD4	frizzled class receptor 4	108.65	77.49	96.47	146.02	147.21	132.97	40.27	65.48	52.19
gene18664	LOC106048035	transmembrane protein 135-like	8.12	5.52	4.65	12.97	10.51	12.36	1.74	4.64	7.9
gene18714	LOC106048101	selenoprotein O	11.13	8.49	11.67	12.61	14.54	18.97	3.82	5.21	6.92
gene18720	EMCN	endomucin, transcript variant X1	74.16	27.8	43.69	69.79	91.1	67.58	26.61	54.19	15.59
gene18771	LOC106048174	protein transport protein Sec24D-like, transcript variant X3	40.73	63	27.82	76.5	63.82	64.86	21.43	28.46	39.62
gene18788	GPX4	glutathione peroxidase 4	623.45	301.6	460.7	631.12	746.91	501.64	253.01	280.94	310.67
gene18862	MYRF	myelin regulatory factor	2.7	2.33	5.92	12.69	8.48	9.55	2.08	1.23	2.54
gene1888	MTR	5-methyltetrahydrofolate-homocysteine methyltransferase	9.28	10.28	8.01	5.27	16.8	15.1	7.08	4.32	6.79
gene18910	LOC106048337	uncharacterized LOC106048337	0.74	0.36	0.28	1.15	0.33	1.21	0.41	0.14	0.19
gene18920	HOXB3	homeobox B3, transcript variant X3	0.12	0.15	0.16	0.29	0.42	0.61	0.07	0.07	0.14
gene18932	HSD17B4	hydroxysteroid (17-beta) dehydrogenase 4	100.37	66.56	86.44	147.72	128.25	107.9	61.39	59.44	67.46
gene1904	GREM2	gremlin 2, DAN family BMP antagonist, transcript variant X3	7.53	7.2	5.92	15.01	13.65	3.52	3.95	2.61	2.93
gene19161	IL11RA	interleukin 11 receptor, alpha, transcript variant X1	27.59	33.76	53.83	127.81	145.25	112.44	33.06	28.92	11.82
gene19164	DLC1	DLC1 Rho GTPase activating protein, transcript variant X3	34.19	37.46	27.69	51.21	47.42	70.33	26.4	21.42	20.67
gene19290	MAPK15	mitogen-activated protein kinase 15, transcript variant X1	5.73	5.53	7.18	9.29	7.14	21.62	3.39	2.42	2.11
gene19333	LOC106048786	ras-related protein Rab-18-B-like, transcript variant X1	763.76	270.98	510.65	1101.28	1281.28	540.87	77.39	57.92	315.84
gene19335	SOST	sclerostin	1.45	0.92	1.4	1.31	1.21	4.82	0.3	0.71	0.26
gene19351	SH3GL2	SH3-domain GRB2-like 2, transcript variant X1	2.07	1.34	0.86	2.16	3.92	3.06	1.24	0.85	0.65
gene19474	CHDH	choline dehydrogenase	4.17	4.29	3.83	7.57	8.35	7.43	4.27	2.49	2.95
gene19571	GATSL3	GATS protein-like 3	25.99	19.45	25.7	33.29	43.84	44.02	15.52	17.12	10.58
gene19614	PALM	paralemmin	19.02	26.32	27.47	37.19	38.25	43.82	24.39	20.95	9.13
gene19633	S100A1	S100 calcium binding protein A1, transcript variant X1	169.31	21.86	176.07	746.96	364.77	148.75	17.56	40.32	47.26
gene19689	SARM1	sterile alpha and TIR motif containing 1	0.62	2.48	1.18	3.23	3.99	3.54	0.55	0.38	0.56
gene19690	VTN	vitronectin	35.59	90.53	88.78	162.47	76.51	88.59	29.28	45.93	26.66
gene19704	OMD	osteomodulin	0.85	3.08	1.48	11.01	4.71	6.87	1.36	0.72	0.62
gene19706	ECM2	extracellular matrix protein 2, female organ and adipocyte specific	87.8	98.89	103.61	231	261.6	140.87	67.95	60.95	55.56
gene19817	ABHD12B	abhydrolase domain containing 12B	57.8	21.47	54.92	120.77	84.84	54.2	10.75	12.64	24.49
gene19822	CDKL1	cyclin-dependent kinase-like 1 (CDC2-related kinase)	13.57	6.4	10.65	12.85	20.88	11.95	7.58	6.68	7.25
gene20	KCNIP2	Kv channel interacting protein 2, transcript variant X1	3.07	1.67	1.48	19.71	18.22	6.68	0.88	0.79	0.52
gene20076	IGFBP4	insulin-like growth factor binding protein 4	230.97	278.4	308.38	553.81	618.79	487.05	187.21	150.32	84.66
gene20120	LOC106049629	histone H2A type 2-C-like	1.07	0.21	1.11	2.2	4.12	1.06	0.26	0.52	0.42
gene20146	LOC106049641	toll-like receptor 2, transcript variant X1	3.64	2.56	2.62	5.76	6.9	2.75	2.64	1.5	0.83
gene20156	LOC106049646	protocadherin alpha-4-like	0.13	0.25	0.44	0.85	0.51	0.9	0.12	0	0.26
gene2018	CCDC167	coiled-coil domain containing 167	51.79	59.75	56.11	71.22	71.95	64.22	46.81	27.72	26.34
gene2019	MDGA1	MAM domain containing glycosylphosphatidylinositol anchor 1, transcript variant X1	1.62	0.39	1	2.63	2.24	1.08	0.06	0.12	0.66
gene2036	MOCS1	molybdenum cofactor synthesis 1, transcript variant X1	23.56	12.47	16.49	28.14	17.32	30.35	7.73	10.28	11.18
gene20385	SLC5A6	solute carrier family 5 (sodium/multivitamin and iodide cotransporter), member 6	17.8	12.14	20.35	26.44	16.11	28.65	10.24	14.76	9.68
gene2047	LOC106029771	uncharacterized LOC106029771, transcript variant X1	129.39	89.33	138.18	151.24	192.95	149.43	41.05	78.56	123.07
gene2076	SRBD1	S1 RNA binding domain 1, transcript variant X2	9.76	11.14	10.79	22.73	20.94	19.28	6.83	6.32	5.71
gene20768	LOC106029637	uncharacterized LOC106029637	13.08	4.23	9.92	27.11	24.69	22.07	6.41	6.34	4.67
gene2078	SIX2	SIX homeobox 2	56.7	70.36	85.42	161.81	187.05	142.34	69.24	15.46	41.87
gene20844	LOC106029718	fatty acid-binding protein, heart-like	85.2	59.27	69.33	205.45	148.47	33.69	42.29	30.78	39.5
gene2117	SLC12A8	solute carrier family 12, member 8, transcript variant X5	1.67	2.94	2.33	3.35	2.34	4.17	1.1	1.29	1.64
gene2120	LOC106029911	TGF-beta receptor type-2-like	33.1	22.92	25.82	77.49	44.48	33.55	25.3	20.41	14.27
gene2125	LOC106029917	glycerol-3-phosphate dehydrogenase [NAD(+)], cytoplasmic-like	61.08	22.38	42.16	134.01	83.75	81.67	11.35	8.89	40.03
gene2139	LOC106029858	uncharacterized LOC106029858	2.95	0.77	0.86	2.42	3.22	5.88	0.97	1.11	0.7
gene214	ZNF511	zinc finger protein 511	33.25	19	26.88	36.22	40.47	28.72	13.24	14.25	16.14
gene2142	OBSL1	obscurin-like 1	0.56	0.29	0.39	0.51	1.16	0.9	0.07	0.1	0.12
gene2171	COBLL1	cordon-bleu WH2 repeat protein-like 1, transcript variant X1	25.69	27.71	15.84	32.72	35.15	63.72	9.22	13.03	15.23
gene2220	SLC25A12	solute carrier family 25 (aspartate/glutamate carrier), member 12	10.57	9.93	9.04	17.09	15.49	17	8.86	6.87	7.52
gene2225	LOC106030000	uncharacterized LOC106030000, transcript variant X2	5.53	4.65	5.38	8.14	12.27	8.21	3.56	3.1	5.07
gene2309	LOC106029848	cytochrome P450 20A1	22.83	25.98	16.4	36.44	32.36	34.79	13.93	15.71	14.61
gene2360	MPP4	membrane protein, palmitoylated 4 (MAGUK p55 subfamily member 4)	1.32	1.46	3.42	0.72	6.23	4.53	0.73	1.49	0.6
gene2427	MPP6	membrane protein, palmitoylated 6 (MAGUK p55 subfamily member 6), transcript variant X7	2.31	1.6	1.52	2.39	2.02	3.67	0.75	0.89	1.56
gene2428	DFNA5	deafness, autosomal dominant 5, transcript variant X2	8.52	4.18	7.01	8.18	8.12	8.97	2.53	3.03	5.69
gene2468	WIPF3	WAS/WASL interacting protein family, member 3, transcript variant X2	0.46	0.35	0.31	0.45	1.92	0.95	0.16	0.13	0.37
gene2473	HACL1	2-hydroxyacyl-CoA lyase 1	15.95	12.06	11.97	11.11	17.9	27.47	8.46	7.21	7.57
gene2555	DNAJC1	DnaJ (Hsp40) homolog, subfamily C, member 1	56.09	46.87	53.14	103.53	93.39	67.88	40.99	37.59	37.93
gene2561	LOC106030330	nebulette-like	3.62	3.52	1.49	7.9	7.83	7.4	1.14	2.11	2.13
gene2574	LOC106030346	macrophage mannose receptor 1-like	32.26	11.51	7.08	28.5	21.07	40.68	6.63	5.32	13.26
gene2636	RAB23	RAB23, member RAS oncogene family	16.53	41.31	18.25	76.27	56	67.28	12.71	12.93	10.09
gene2668	LOC106030437	glutathione S-transferase-like	99.14	78.57	186.54	205.04	328.88	191.28	49.32	54.76	84.22
gene2690	ARHGEF10	Rho guanine nucleotide exchange factor (GEF) 10, transcript variant X1	7.52	9.73	7.08	11.53	14.9	17.31	7.42	4.75	6.72
gene2716	NDUFAF6	NADH dehydrogenase (ubiquinone) complex I, assembly factor 6	11.05	9.3	9.36	8.7	15.7	15.41	4.82	5.81	9.11
gene2730	FSBP	fibrinogen silencer binding protein	1.73	2.19	2.18	3.63	3.19	3.92	0.65	0.63	0.74
gene2731	GEM	GTP binding protein overexpressed in skeletal muscle	67.23	80.09	83.57	126.89	182.77	131.7	43.31	80.83	47.68
gene2746	RUNX1T1	runt-related transcription factor 1; translocated to, 1 (cyclin D-related)	9.52	6.22	8.24	12.67	12.61	13.13	9.53	3.29	5.36
gene275	PCBD1	pterin-4 alpha-carbinolamine dehydratase/dimerization cofactor of hepatocyte nuclear factor 1 alpha	36.07	57.14	31.9	56.2	39.53	83.9	36.47	17.9	22.68
gene2759	DECR1	2,4-dienoyl CoA reductase 1, mitochondrial, transcript variant X1	46.81	33.94	42.25	74.81	56.19	52.79	25.56	28.89	17.4
gene2809	LOC106030570	uncharacterized LOC106030570, transcript variant X1	12.39	14.3	9.66	20.72	34.2	29	8.88	7.89	8.43
gene2815	HEY1	hes-related family bHLH transcription factor with YRPW motif 1	20.87	13.9	14.47	12.86	26.17	57.74	5.81	15.83	9.38
gene2841	STAU2	staufen double-stranded RNA binding protein 2, transcript variant X1	31.55	41.56	25.3	54.7	52.03	54.27	25.55	25.56	26.52
gene2864	SULF1	sulfatase 1	18.81	42.51	21.11	100.76	74.7	104.38	17.13	5.23	7.58
gene2867	LOC106030608	chromosome unknown open reading frame, human C8orf34, transcript variant X1	1.08	3.84	2.56	7.92	8.28	6.6	0.91	1.02	0.79
gene2995	GABRA4	gamma-aminobutyric acid (GABA) A receptor, alpha 4, transcript variant X1	0.09	1.08	0.07	1.03	0.84	0.72	0.12	0.41	0.2
gene3030	KDR	kinase insert domain receptor	22.82	33.4	9.85	28.22	40.41	24.97	8.1	10.32	9.92
gene3089	LMO3	LIM domain only 3 (rhombotin-like 2), transcript variant X1	1.72	2.48	2.74	4.36	8.39	7.23	0.46	0.39	0.86
gene3090	MGST1	microsomal glutathione S-transferase 1, transcript variant X2	319.69	184.68	330.31	544.83	529.65	330.53	188.31	192.1	167.8
gene3094	DERA	deoxyribose-phosphate aldolase (putative), transcript variant X1	10.29	8.71	8.95	23.41	17.06	14.75	6.31	6.66	5.53
gene3099	RERG	RAS-like, estrogen-regulated, growth inhibitor, transcript variant X2	14.65	9.2	4.93	12.64	11.28	18.5	5.51	9.31	5.91
gene3107	LOC106030918	aldose reductase-like	373.69	289.96	385.9	975.08	499.94	261.75	141.31	143.26	169.13
gene3122	CECR1	cat eye syndrome chromosome region, candidate 1, transcript variant X1	11.87	9.43	11.31	25.46	17.01	13.82	8.46	5.84	8.38
gene3131	ADIPOR2	adiponectin receptor 2, transcript variant X1	178.21	112.56	127.48	198.75	233.26	178.44	87.46	97.98	111.88
gene3179	FAM180A	family with sequence similarity 180, member A	9.82	10.54	21.52	15.51	35.73	24.38	14.32	6.24	10.25
gene3200	ADCK2	aarF domain containing kinase 2	24.01	16.24	20.17	36.55	33.22	31.39	16.66	13.08	10.17
gene3201	DENND2A	DENN/MADD domain containing 2A, transcript variant X1	47.43	43.4	31.34	72.94	78.84	88.14	33.07	31.39	24.76
gene3243	SEZ6L	seizure related 6 homolog (mouse)-like	0.25	3.54	0.89	12.58	8.37	9.47	0.27	0.57	0.98
gene3261	MYO1H	myosin IH	8.6	3.66	8.6	6.12	12.66	15.33	2.72	3.49	3.96
gene3264	FOXN4	forkhead box N4	1.56	0.44	2.38	2.29	8.35	5.01	0.66	0.54	1.27
gene3267	ACACB	acetyl-CoA carboxylase beta	17.47	6.58	12.25	16.52	24.08	20.39	2.12	2.19	7.21
gene3295	ALDH2	aldehyde dehydrogenase 2 family (mitochondrial)	229.03	264.27	250.97	583.04	666.97	450.95	201.09	165.39	113.36
gene3340	ANAPC5	anaphase promoting complex subunit 5	11.64	7.88	9.87	11.26	14.65	15.6	3.97	5.12	7.24
gene3342	LOC106031149	P2X purinoceptor 4-like, transcript variant X1	0.68	1.09	0.3	5.87	5.12	5.87	0	0	0.84
gene3363	CDK2AP1	cyclin-dependent kinase 2 associated protein 1	62.42	48.78	81.89	122.99	174.31	98.37	64.71	37.7	40.89
gene3445	TXNRD2	thioredoxin reductase 2	4.96	4.12	4.12	2.93	5.71	8.38	2.1	2.31	3.78
gene354	SLC16A9	solute carrier family 16, member 9, transcript variant X1	32.72	13.62	23.17	42.83	44.18	30.05	13.84	10.35	13.6
gene3544	PIK3IP1	phosphoinositide-3-kinase interacting protein 1	51.24	45.22	51.1	94.49	139.97	110.44	23.98	18.04	35.71
gene3632	LOC106031494	uncharacterized LOC106031494, transcript variant X3	0.81	0.7	0.81	1.07	1.76	1.33	0.33	0.62	0.67
gene3663	SERTAD4	SERTA domain containing 4	21.41	16.15	17.72	20.82	37.49	18.45	16.17	7.35	13.41
gene3667	KCNH1	potassium channel, voltage gated eag related subfamily H, member 1, transcript variant X2	0.23	0.14	0.04	0.58	0.38	0.32	0.09	0.13	0.04
gene3668	RCOR3	REST corepressor 3, transcript variant X1	9.71	7.01	9.34	11.3	15.72	16.94	7.35	6.63	4.94
gene3717	LYPLAL1	lysophospholipase-like 1, transcript variant X1	19.24	12.75	18.84	26.74	24.85	23.34	7.05	5.08	5.48
gene3817	FSIP1	fibrous sheath interacting protein 1, transcript variant X3	0.32	0.16	0.34	0.73	0.72	0.63	0.03	0.05	0.13
gene382	LOC106032017	adipogenesis regulatory factor-like, transcript variant X1	3870.34	845.16	3995.2	6730.84	4616.56	3419.33	834.46	930.14	1092.63
gene3847	NOVA1	neuro-oncological ventral antigen 1, transcript variant X2	13.36	11.22	9.17	10.89	24.54	21.92	9.03	10.17	6.86
gene3867	LOC106031736	uncharacterized LOC106031736, transcript variant X2	0.48	0.28	0.5	0.75	1.48	0.79	0.37	0.05	0.3
gene4045	ABLIM1	actin binding LIM protein 1, transcript variant X1	39.26	43.96	37.54	64.89	82.88	81.25	20.04	27.52	37.47
gene4100	SLC2A2	solute carrier family 2 (facilitated glucose transporter), member 2	0.25	0.16	0.02	0.85	0.31	0.08	0.02	0.05	0.02
gene4107	TNFSF10	tumor necrosis factor (ligand) superfamily, member 10, transcript variant X1	41.35	41.37	30.3	77.02	111.78	83.65	27.38	7.91	30.28
gene4151	MCCC1	methylcrotonoyl-CoA carboxylase 1 (alpha), transcript variant X1	7.17	7.94	7.29	13.99	14.07	12.04	4.84	2.41	7.13
gene4234	PEMT	phosphatidylethanolamine N-methyltransferase, transcript variant X2	28.54	36.93	28.85	38.1	51.76	50.41	19.27	19.86	22.56
gene4279	HAGH	hydroxyacylglutathione hydrolase, transcript variant X2	70.59	39.45	50.34	85.68	103.4	87.83	39.96	41.34	24.52
gene428	LOC106032636	uncharacterized LOC106032636, transcript variant X1	0.82	0.95	0.28	3.27	3.3	1.74	0	0.48	0
gene4280	FAHD1	fumarylacetoacetate hydrolase domain containing 1	3.21	1.34	2.51	3.54	7.58	7	1.12	1.23	0.59
gene4293	SLC9A3R2	solute carrier family 9, subfamily A (NHE3, cation proton antiporter 3), member 3 regulator 2, transcript variant X1	115.57	89.51	94.08	140.58	149.88	242.95	36.62	88.47	48.38
gene4294	NTHL1	nth-like DNA glycosylase 1	74.02	62.17	77.58	64.2	83.07	119.58	33.54	58.61	33.94
gene4315	EDNRA	endothelin receptor type A	86.73	39.45	78.31	67.89	86.99	132.48	35.27	29.18	32.87
gene4319	NR3C2	nuclear receptor subfamily 3, group C, member 2	4.11	2.36	3.2	7.2	9.59	6	2.32	2.28	2.25
gene4344	LOC106032261	uncharacterized LOC106032261	6.24	3.23	5.43	6.18	8.63	12.18	5.4	2.74	1.86
gene4351	SFRP2	secreted frizzled-related protein 2	168.73	242.56	998.67	1626.08	1901.11	265.47	288.41	90.14	105.9
gene4353	LOC106032354	uncharacterized LOC106032354	0.29	0.38	0.14	0.78	1.4	2.33	0.08	0	0.17
gene4367	GUCY1A3	guanylate cyclase 1, soluble, alpha 3, transcript variant X3	20.93	6.24	11.54	18.65	19.86	32.15	5.44	10.4	7.09
gene4423	MSMO1	methylsterol monooxygenase 1	44.94	30.49	41.8	89.77	68.62	40.76	29.55	22.65	25.9
gene4498	RSPO3	R-spondin 3, transcript variant X1	26.34	7.44	23.92	36.48	49.58	16.42	9.18	3.6	14.11
gene4502	LOC106032484	protein SOGA3, transcript variant X4	3.26	4.05	5.47	5.58	10.25	7.73	2.05	1.21	1.66
gene4580	CITED2	Cbp/p300-interacting transactivator, with Glu/Asp-rich carboxy-terminal domain, 2	9.62	6.08	10.29	13.25	20.32	13.62	1.18	2.87	4.23
gene459	KAT6B	K(lysine) acetyltransferase 6B	7.9	4.67	5.23	8.62	15.9	9.39	4.09	4.68	5.15
gene4601	LAMA4	laminin, alpha 4, transcript variant X1	48.23	45.08	33.33	56.68	56.65	61.06	21.02	32.59	25.99
gene4620	DDO	D-aspartate oxidase, transcript variant X1	0.23	0.12	0.05	1.37	1.51	0.29	0	0	0.16
gene4723	LOC106032739	uncharacterized LOC106032739, transcript variant X2	0.18	0.35	0.32	0.91	0.59	0.88	0	0.2	0.16
gene4757	MEIKIN	meiotic kinetochore factor	1.83	1.49	2.45	2.42	4.35	3.52	1.65	0.61	0.95
gene4765	FSTL4	follistatin-like 4, transcript variant X1	1.58	1.55	0.98	4.4	6.72	1.67	0.51	1.48	0.55
gene4801	SPOCK1	sparc/osteonectin, cwcv and kazal-like domains proteoglycan (testican) 1, transcript variant X1	2.6	1.39	6.03	2.92	8.96	4.28	2.84	2.09	1.64
gene4829	LOC106032902	uncharacterized LOC106032902	1.25	0.9	1.01	2.22	3.57	2.47	0.59	0.44	0.96
gene4881	GRIA1	glutamate receptor, ionotropic, AMPA 1, transcript variant X1	0.34	0.24	0.94	1.57	1.73	0.39	0.1	0.1	0.26
gene4899	SGCD	sarcoglycan, delta (35kDa dystrophin-associated glycoprotein), transcript variant X1	12.25	3.2	10.48	27.89	18.49	5.53	8.12	7.19	3.69
gene5032	CDKN2C	cyclin-dependent kinase inhibitor 2C (p18, inhibits CDK4)	38.44	27.12	13.34	50.57	44.01	38.45	10.6	7.89	20.57
gene5042	BEND5	BEN domain containing 5, transcript variant X1	9.3	6.23	9.97	13.57	10.71	10.62	5.02	3	5.61
gene5078	PIK3R3	phosphoinositide-3-kinase, regulatory subunit 3 (gamma)	21.88	20.61	22.73	26.14	47.37	33.85	13.9	19.25	17.01
gene518	MAEA	macrophage erythroblast attacher, transcript variant X1	100.04	98.28	95.06	133.74	132.1	124.62	58.41	54.6	73.7
gene5188	ARL2BP	ADP-ribosylation factor-like 2 binding protein, transcript variant X1	18.2	17.44	12.31	21.69	24.33	31.56	12.76	14.81	10.98
gene5196	ENKD1	enkurin domain containing 1, transcript variant X4	6.73	8.08	9.34	21.51	11.21	18.77	6.62	5.09	2.82
gene5200	NDRG4	NDRG family member 4, transcript variant X1	40.17	14.9	42.67	92.48	37.78	40.72	3.25	10.18	10.71
gene5274	LOC106033249	uncharacterized LOC106033249, transcript variant X3	23.29	33.15	35.96	35.83	58.07	53.25	22.7	14.3	20.21
gene5290	ADAMTS18	ADAM metallopeptidase with thrombospondin type 1 motif, 18, transcript variant X1	0.78	0.49	0.53	0.87	1.25	1.25	0.41	0.32	0.21
gene5370	CDIP1	cell death-inducing p53 target 1, transcript variant X2	12.12	8.57	12.46	13.47	13.59	14.47	8.57	6.62	5.49
gene538	NAT8L	N-acetyltransferase 8-like (GCN5-related, putative)	0.25	0.87	0.42	1.79	1.07	0.99	0.15	0.1	0.17
gene5395	MPG	N-methylpurine DNA glycosylase, transcript variant X3	12.89	7.46	7.35	19.74	18.21	9.94	7.7	5.32	5.22
gene5431	LOC106033455	multidrug resistance-associated protein 6-like	4.19	1.93	2.33	3.46	11.68	6.37	1.21	1.96	2.18
gene5460	LOC106033473	acyl-coenzyme A synthetase ACSM3, mitochondrial-like, transcript variant X1	2.1	1.9	1.94	2.45	2.45	3.2	1.18	0.92	0.95
gene5468	TMEM159	transmembrane protein 159	57.71	47.91	59.82	101.84	91.01	56.63	49.09	27.16	24.32
gene5470	CRYM	crystallin, mu, transcript variant X1	4.76	3.72	8.36	16.67	15.59	13.61	2.77	3.2	5.3
gene5505	BAIAP2L1	BAI1-associated protein 2-like 1	13.38	9.91	12.97	26.87	24.88	26.39	4.02	4.39	5.43
gene5520	PRKAR1B	protein kinase, cAMP-dependent, regulatory, type I, beta, transcript variant X1	42.8	33.2	37.7	49.62	76.43	52.81	16.9	27.02	17.45
gene5549	LOC106033548	galanin receptor type 1-like	0.36	0.14	0.31	0.55	0.58	0.74	0.17	0.11	0.06
gene5577	SLC24A5	solute carrier family 24 (sodium/potassium/calcium exchanger), member 5	17.82	14.1	12.36	15.49	24.68	29.29	10.91	11.98	11.83
gene5579	SEMA6D	sema domain, transmembrane domain (TM), and cytoplasmic domain, (semaphorin) 6D, transcript variant X1	19.32	7.27	16.7	23.29	34.07	24.69	4.69	4.85	7.46
gene5612	UNC13C	unc-13 homolog C (C. elegans), transcript variant X1	4.85	8.16	5.93	5.79	13.51	17.23	1.39	1.81	3.86
gene5624	NEDD4	neural precursor cell expressed, developmentally down-regulated 4, E3 ubiquitin protein ligase	8.85	7.89	7.53	10.6	16.08	13.94	5.77	6.43	5.28
gene563	DOK7	docking protein 7, transcript variant X4	1.14	0.41	0.78	2.77	1.31	2.71	0.33	0.16	0.51
gene5639	AQP9	aquaporin 9, transcript variant X1	11	2.96	6.47	17.03	13.46	9.24	1.42	1.69	4.07
gene5721	HYKK	hydroxylysine kinase	7.55	4.82	6.33	16.03	15.52	10.78	3.72	3.25	5.59
gene5747	RAB3IL1	RAB3A interacting protein (rabin3)-like 1, transcript variant X1	27.21	34.05	22.53	53	45.65	39.15	30.26	17.79	14.09
gene5770	ANO3	anoctamin 3	1.63	0.77	0.55	2.27	4.89	2.13	0.49	0.81	0.44
gene5775	LOC106033949	uncharacterized LOC106033949, transcript variant X4	1.66	0.61	0.87	1.25	3.21	2.53	0.58	0.88	0.13
gene581	AFAP1	actin filament associated protein 1, transcript variant X1	9.18	12.27	6	19.77	16.22	18.43	5.87	5.4	7.12
gene5877	CFAP57	cilia and flagella associated protein 57, transcript variant X1	10.38	5.66	8.46	6.25	14.93	13.49	7.06	3.48	4.06
gene5897	PTGFR	prostaglandin F receptor (FP), transcript variant X1	12.05	12.49	21.23	22.9	20.51	21.91	6.94	15.79	6.52
gene5927	SPATA1	spermatogenesis associated 1, transcript variant X1	6.27	5.2	4.24	9.33	10.8	8.84	3.9	4.07	4.35
gene5956	LOC106034043	uncharacterized LOC106034043, transcript variant X1	2.97	1.48	2.14	3.19	3.04	3.38	1.47	2.01	1.28
gene600	EVC	Ellis van Creveld protein	5.33	2.63	4.68	4.73	8.74	11.55	3.58	1.97	2.55
gene6002	PDGFD	platelet derived growth factor D	47.44	61.17	62.64	109.02	141.83	164.39	47.53	33.2	39.75
gene6006	LOC106034120	collagenase 3-like	0.14	1.16	1.01	0.59	1.42	6.9	0.69	0.19	0.15
gene601	EVC2	Ellis van Creveld syndrome 2, transcript variant X1	3.59	2.07	2.81	3.52	4.95	5.2	1.36	1.4	1.2
gene6012	MMP7	matrix metallopeptidase 7	1.64	0.09	1.92	3.24	13.32	0.79	0.97	1.08	0
gene6021	TRPC6	transient receptor potential cation channel, subfamily C, member 6	1.14	1.09	1.23	2.43	4.26	5.99	0.28	0.82	0.79
gene6029	CCDC82	coiled-coil domain containing 82	11.38	9.76	10.8	14.23	10.83	18.11	5.42	3.32	6.25
gene6036	SESN3	sestrin 3, transcript variant X1	19.77	14.55	11.13	30.1	33.13	21.08	6.96	8.84	10.89
gene6070	LOC106034162	putative N-acetylated-alpha-linked acidic dipeptidase, transcript variant X1	2.81	0.97	1.52	3.01	3.82	3.62	1.09	0.81	1.27
gene6080	TMEM135	transmembrane protein 135	15.93	10.17	12.83	19.24	26.16	24.09	9.51	9.04	11.6
gene6111	PLEKHG1	pleckstrin homology domain containing, family G (with RhoGef domain) member 1, transcript variant X1	5.42	6.06	4.86	8.01	13.02	9.36	3.15	3.16	5.55
gene6114	AKAP12	A kinase (PRKA) anchor protein 12, transcript variant X1	28.2	95.07	27.53	66.81	100.79	102.52	52.53	11.56	47.74
gene6118	CCDC170	coiled-coil domain containing 170, transcript variant X1	2.93	3.55	2.02	7.29	7.29	5.94	2.81	1.69	1.63
gene6137	TFB1M	transcription factor B1, mitochondrial	9.48	6.01	8.22	7.72	13.45	14.69	6.66	2.93	5.2
gene6146	TMEM242	transmembrane protein 242	31.99	32.02	40.85	47.84	43.5	41	25.9	21.37	14.3
gene62	LOC106037870	adhesion G protein-coupled receptor A3-like	7.94	4.95	3.95	10.96	15.77	17.2	0.82	1.49	3.27
gene63	LOC106037964	uncharacterized LOC106037964, transcript variant X1	3.4	0.71	0.23	3.91	0.65	3.04	1.18	0.79	1.36
gene6341	LOC106034586	putative methyltransferase DDB_G0268948	52.36	59.74	57.64	100.88	94.74	77.22	51.08	37.8	44.51
gene6373	UNC80	unc-80 homolog (C. elegans)	3.04	4.64	3.32	4.11	11.74	29.92	2.27	2.13	1.49
gene6376	LOC106034513	uncharacterized LOC106034513, transcript variant X2	0.39	0.34	0.61	2.4	0.42	1.34	0.21	0.26	0.19
[truncated: 119 more rows]
