# Supplementary material for: Transcriptome Profiling Unveils Key Genes Regulating the Growth and Development of Yangzhou Goose Knob
Source: Int J Mol Sci. 2024 Apr 10;25(8):4166. doi: 10.3390/ijms25084166 (PMC11050116; doi:10.3390/ijms25084166)
Supplement: Supplementary file 1 [file ijms-25-04166-s001.zip › Table S7.xlsx]

## Sheet: Guide
Table S7. GO analysis of key modules in WGCNA
Guide
turquoise	GO analysis of Turquoise key modules
yellow	GO analysis of yellow key modules
blue	GO analysis of blue key modules
brown	GO analysis of brown key modules
green	GO analysis of green key modules

## Sheet: turquoise
Number	GO ID	Term Type	Description	Ratio_in_study	Ratio_in_pop	Rich factor	Pvalue	Padjust	Gene_ids	Gene_names
7	GO:0050863	BP	regulation of T cell activation	7/ 120	45/ 12028	0.155556	2.73509e-07	0.00380752	gene7610;gene12495;gene15751;gene9941;gene2313;gene2315;gene2314	RAC2;PTPN22;BCL6;FAM49B;CD28;LOC106030066;CTLA4
7	GO:0051249	BP	regulation of lymphocyte activation	7/ 120	58/ 12028	0.12069	1.6282e-06	0.00994886	gene7610;gene12495;gene15751;gene9941;gene2313;gene2315;gene2314	RAC2;PTPN22;BCL6;FAM49B;CD28;LOC106030066;CTLA4
10	GO:0002684	BP	positive regulation of immune system process	10/ 120	148/ 12028	0.0675676	2.144e-06	0.00994886	gene7610;gene16004;gene12495;gene15751;gene17307;gene7658;gene9941;gene9870;gene9713;gene2315	RAC2;SYK;PTPN22;BCL6;THEMIS2;TAB1;FAM49B;LOC106038357;PLA2G7;LOC106030066
12	GO:0002682	BP	regulation of immune system process	12/ 120	237/ 12028	0.0506329	4.17737e-06	0.0145383	gene7610;gene16004;gene12495;gene15751;gene17307;gene7658;gene9941;gene9870;gene2313;gene9713;gene2315;gene2314	RAC2;SYK;PTPN22;BCL6;THEMIS2;TAB1;FAM49B;LOC106038357;CD28;PLA2G7;LOC106030066;CTLA4
7	GO:0002694	BP	regulation of leukocyte activation	7/ 120	73/ 12028	0.0958904	7.79872e-06	0.0211025	gene7610;gene12495;gene15751;gene9941;gene2313;gene2315;gene2314	RAC2;PTPN22;BCL6;FAM49B;CD28;LOC106030066;CTLA4
5	GO:0050670	BP	regulation of lymphocyte proliferation	5/ 120	30/ 12028	0.166667	1.06111e-05	0.0211025	gene7610;gene2313;gene15751;gene12495;gene2314	RAC2;CD28;BCL6;PTPN22;CTLA4
5	GO:0032944	BP	regulation of mononuclear cell proliferation	5/ 120	30/ 12028	0.166667	1.06111e-05	0.0211025	gene7610;gene2313;gene15751;gene12495;gene2314	RAC2;CD28;BCL6;PTPN22;CTLA4
7	GO:0050865	BP	regulation of cell activation	7/ 120	78/ 12028	0.0897436	1.21359e-05	0.021118	gene7610;gene12495;gene15751;gene9941;gene2313;gene2315;gene2314	RAC2;PTPN22;BCL6;FAM49B;CD28;LOC106030066;CTLA4
5	GO:0070663	BP	regulation of leukocyte proliferation	5/ 120	32/ 12028	0.15625	1.47576e-05	0.0228267	gene7610;gene2313;gene15751;gene12495;gene2314	RAC2;CD28;BCL6;PTPN22;CTLA4
4	GO:0042129	BP	regulation of T cell proliferation	4/ 120	23/ 12028	0.173913	7.20518e-05	0.100303	gene2313;gene7610;gene12495;gene2314	CD28;RAC2;PTPN22;CTLA4
12	GO:0002376	BP	immune system process	12/ 120	319/ 12028	0.0376176	8.00388e-05	0.101293	gene19459;gene7614;gene12495;gene2314;gene15751;gene17307;gene7658;gene9870;gene18476;gene16004;gene2315;gene2313	IRF5;MFNG;PTPN22;CTLA4;BCL6;THEMIS2;TAB1;LOC106038357;CD4;SYK;LOC106030066;CD28
2	GO:0000076	BP	DNA replication checkpoint	2/ 120	2/ 12028	1	9.87137e-05	0.105707	gene14690;gene8089	TIPIN;TICRR
2	GO:0031298	CC	replication fork protection complex	2/ 120	2/ 12028	1	9.87137e-05	0.105707	gene14690;gene19763	TIPIN;GINS2
4	GO:0050851	BP	antigen receptor-mediated signaling pathway	4/ 120	27/ 12028	0.148148	0.000138467	0.137686	gene16004;gene17307;gene12495;gene7658	SYK;THEMIS2;PTPN22;TAB1
51	GO:0050794	BP	regulation of cellular process	51/ 120	3230/ 12028	0.0157895	0.000248498	0.223562	gene16220;gene10067;gene2313;gene3669;gene12495;gene15751;gene14021;gene7658;gene17183;gene1335;gene7610;gene17622;gene7614;gene8744;gene6479;gene7619;gene14384;gene3533;gene18300;gene1883;gene9941;gene2096;gene5173;gene3829;gene4828;gene11335;gene4700;gene16004;gene18295;gene1157;gene11139;gene19459;gene20461;gene14267;gene2315;gene17923;gene10080;gene9507;gene342;gene13916;gene13934;gene17307;g…	DKK2;LOC106038552;CD28;TRAF5;PTPN22;BCL6;DOCK8;TAB1;TFDP1;LOC106040700;RAC2;FMNL1;MFNG;TRAF2;KPNA2;SH3BP1;BCL2A1;ANHX;RASSF2;EDARADD;FAM49B;EAF2;E2F4;ARHGAP11A;CNOT6;STAT4;CDC23;SYK;ARHGAP25;STK4;PDZD3;IRF5;ADRBK1;LOC106043193;LOC106030066;TNFRSF9;XIAP;LOC106037928;RTKN2;LOC106042836;RBM5;THEMIS2;GRK4;TIPIN;LOC106038357;TAF4;PLA2G7;DGKZ;CTLA4;TICRR;CDC42SE2
4	GO:0002429	BP	immune response-activating cell surface receptor signaling pathway	4/ 120	32/ 12028	0.125	0.000273008	0.223562	gene16004;gene17307;gene12495;gene7658	SYK;THEMIS2;PTPN22;TAB1
4	GO:0002757	BP	immune response-activating signal transduction	4/ 120	32/ 12028	0.125	0.000273008	0.223562	gene16004;gene17307;gene12495;gene7658	SYK;THEMIS2;PTPN22;TAB1
4	GO:0002768	BP	immune response-regulating cell surface receptor signaling pathway	4/ 120	34/ 12028	0.117647	0.000346713	0.254031	gene16004;gene17307;gene12495;gene7658	SYK;THEMIS2;PTPN22;TAB1
4	GO:0002685	BP	regulation of leukocyte migration	4/ 120	34/ 12028	0.117647	0.000346713	0.254031	gene9870;gene7610;gene12495;gene9713	LOC106038357;RAC2;PTPN22;PLA2G7
4	GO:0002764	BP	immune response-regulating signaling pathway	4/ 120	35/ 12028	0.114286	0.000388453	0.270383	gene16004;gene17307;gene12495;gene7658	SYK;THEMIS2;PTPN22;TAB1
26	GO:0007165	BP	signal transduction	26/ 120	1279/ 12028	0.0203284	0.000453606	0.286116	gene10067;gene7658;gene15751;gene14267;gene3669;gene7610;gene8744;gene6479;gene7619;gene14021;gene3533;gene18300;gene3829;gene16004;gene18295;gene1157;gene19459;gene20461;gene12495;gene342;gene17307;gene556;gene11335;gene11139;gene1417;gene1883	LOC106038552;TAB1;BCL6;LOC106043193;TRAF5;RAC2;TRAF2;KPNA2;SH3BP1;DOCK8;ANHX;RASSF2;ARHGAP11A;SYK;ARHGAP25;STK4;IRF5;ADRBK1;PTPN22;RTKN2;THEMIS2;GRK4;STAT4;PDZD3;DGKZ;EDARADD
7	GO:0050776	BP	regulation of immune response	7/ 120	138/ 12028	0.0507246	0.000455028	0.286116	gene7610;gene12495;gene15751;gene17307;gene7658;gene9941;gene16004	RAC2;PTPN22;BCL6;THEMIS2;TAB1;FAM49B;SYK
52	GO:0050789	BP	regulation of biological process	52/ 120	3418/ 12028	0.0152136	0.000487867	0.286116	gene16565;gene16220;gene10067;gene2313;gene3669;gene12495;gene15751;gene14021;gene7658;gene17183;gene1335;gene7610;gene17622;gene7614;gene8744;gene6479;gene7619;gene14384;gene3533;gene18300;gene1883;gene9941;gene2096;gene5173;gene3829;gene4828;gene11335;gene4700;gene16004;gene18295;gene1157;gene11139;gene19459;gene20461;gene14267;gene2315;gene17923;gene10080;gene9507;gene342;gene13916;gene13934;g…	SMG8;DKK2;LOC106038552;CD28;TRAF5;PTPN22;BCL6;DOCK8;TAB1;TFDP1;LOC106040700;RAC2;FMNL1;MFNG;TRAF2;KPNA2;SH3BP1;BCL2A1;ANHX;RASSF2;EDARADD;FAM49B;EAF2;E2F4;ARHGAP11A;CNOT6;STAT4;CDC23;SYK;ARHGAP25;STK4;PDZD3;IRF5;ADRBK1;LOC106043193;LOC106030066;TNFRSF9;XIAP;LOC106037928;RTKN2;LOC106042836;RBM5;THEMIS2;GRK4;TIPIN;LOC106038357;TAF4;PLA2G7;DGKZ;CTLA4;TICRR;CDC42SE2
3	GO:0002690	BP	positive regulation of leukocyte chemotaxis	3/ 120	16/ 12028	0.1875	0.000493267	0.286116	gene9870;gene7610;gene9713	LOC106038357;RAC2;PLA2G7
4	GO:0051251	BP	positive regulation of lymphocyte activation	4/ 120	38/ 12028	0.105263	0.00053515	0.297993	gene9941;gene15751;gene2315;gene12495	FAM49B;BCL6;LOC106030066;PTPN22
2	GO:0071677	BP	positive regulation of mononuclear cell migration	2/ 120	4/ 12028	0.5	0.000584562	0.301396	gene9870;gene9713	LOC106038357;PLA2G7
2	GO:0090026	BP	positive regulation of monocyte chemotaxis	2/ 120	4/ 12028	0.5	0.000584562	0.301396	gene9870;gene9713	LOC106038357;PLA2G7
10	GO:0042127	BP	regulation of cell population proliferation	10/ 120	291/ 12028	0.0343643	0.000655156	0.32573	gene4828;gene7610;gene17923;gene12495;gene15751;gene14690;gene11335;gene2313;gene2314;gene5173	CNOT6;RAC2;TNFRSF9;PTPN22;BCL6;TIPIN;STAT4;CD28;CTLA4;E2F4
11	GO:0030234	MF	enzyme regulator activity	11/ 120	347/ 12028	0.0317003	0.000689676	0.331068	gene18285;gene7610;gene7619;gene10080;gene3533;gene5524;gene7658;gene16744;gene19516;gene11139;gene10548	NCAPH;RAC2;SH3BP1;XIAP;ANHX;ADAP1;TAB1;STRADA;LOC106048981;PDZD3;LOC106039127
3	GO:0002688	BP	regulation of leukocyte chemotaxis	3/ 120	19/ 12028	0.157895	0.00083509	0.38751	gene9870;gene7610;gene9713	LOC106038357;RAC2;PLA2G7
54	GO:0065007	BP	biological regulation	54/ 120	3665/ 12028	0.014734	0.000912317	0.40831	gene16565;gene16220;gene10067;gene2313;gene3669;gene12495;gene15751;gene14021;gene7658;gene17183;gene1335;gene7610;gene17622;gene7614;gene8744;gene6479;gene7619;gene14384;gene3533;gene18300;gene1883;gene9941;gene2096;gene5173;gene3829;gene4828;gene11335;gene4700;gene16004;gene18295;gene5161;gene1157;gene11139;gene19459;gene20461;gene14267;gene2315;gene6301;gene17923;gene10080;gene9507;gene342;gen…	SMG8;DKK2;LOC106038552;CD28;TRAF5;PTPN22;BCL6;DOCK8;TAB1;TFDP1;LOC106040700;RAC2;FMNL1;MFNG;TRAF2;KPNA2;SH3BP1;BCL2A1;ANHX;RASSF2;EDARADD;FAM49B;EAF2;E2F4;ARHGAP11A;CNOT6;STAT4;CDC23;SYK;ARHGAP25;LOC106033135;STK4;PDZD3;IRF5;ADRBK1;LOC106043193;LOC106030066;USP40;TNFRSF9;XIAP;LOC106037928;RTKN2;LOC106042836;RBM5;THEMIS2;GRK4;TIPIN;LOC106038357;TAF4;PLA2G7;DGKZ;CTLA4;TICRR;CDC42SE2
2	GO:0090025	BP	regulation of monocyte chemotaxis	2/ 120	5/ 12028	0.4	0.000967906	0.40831	gene9870;gene9713	LOC106038357;PLA2G7
2	GO:0033276	CC	transcription factor TFTC complex	2/ 120	5/ 12028	0.4	0.000967906	0.40831	gene12122;gene3968	TAF4;TAF5
3	GO:0002687	BP	positive regulation of leukocyte migration	3/ 120	21/ 12028	0.142857	0.00112965	0.449311	gene9870;gene7610;gene9713	LOC106038357;RAC2;PLA2G7
3	GO:0050921	BP	positive regulation of chemotaxis	3/ 120	21/ 12028	0.142857	0.00112965	0.449311	gene9870;gene7610;gene9713	LOC106038357;RAC2;PLA2G7
4	GO:0002696	BP	positive regulation of leukocyte activation	4/ 120	48/ 12028	0.0833333	0.00130656	0.491583	gene9941;gene15751;gene2315;gene12495	FAM49B;BCL6;LOC106030066;PTPN22
4	GO:0002521	BP	leukocyte differentiation	4/ 120	48/ 12028	0.0833333	0.00130656	0.491583	gene15751;gene4642;gene12495;gene7614	BCL6;OSTM1;PTPN22;MFNG
4	GO:0050867	BP	positive regulation of cell activation	4/ 120	49/ 12028	0.0816327	0.00141184	0.517218	gene9941;gene15751;gene2315;gene12495	FAM49B;BCL6;LOC106030066;PTPN22
6	GO:0004721	MF	phosphoprotein phosphatase activity	6/ 120	125/ 12028	0.048	0.00155439	0.554836	gene12504;gene12495;gene16540;gene13131;gene7658;gene18465	PPM1J;PTPN22;DUSP12;PTPRC;TAB1;PTPN6
4	GO:0002253	BP	activation of immune response	4/ 120	55/ 12028	0.0727273	0.0021707	0.755459	gene16004;gene17307;gene12495;gene7658	SYK;THEMIS2;PTPN22;TAB1
5	GO:0050778	BP	positive regulation of immune response	5/ 120	93/ 12028	0.0537634	0.00234884	0.788362	gene9941;gene16004;gene17307;gene12495;gene7658	FAM49B;SYK;THEMIS2;PTPN22;TAB1
3	GO:0002703	BP	regulation of leukocyte mediated immunity	3/ 120	27/ 12028	0.111111	0.00237851	0.788362	gene9941;gene7610;gene15751	FAM49B;RAC2;BCL6
4	GO:0002697	BP	regulation of immune effector process	4/ 120	59/ 12028	0.0677966	0.00280958	0.909585	gene9941;gene7610;gene15751;gene12495	FAM49B;RAC2;BCL6;PTPN22
3	GO:0002699	BP	positive regulation of immune effector process	3/ 120	30/ 12028	0.1	0.00323048	0.999366	gene9941;gene7610;gene12495	FAM49B;RAC2;PTPN22
3	GO:0004715	MF	non-membrane spanning protein tyrosine kinase activity	3/ 120	30/ 12028	0.1	0.00323048	0.999366	gene16004;gene10479;gene3005	SYK;LYN;TXK
3	GO:0050870	BP	positive regulation of T cell activation	3/ 120	31/ 12028	0.0967742	0.00355081	1	gene9941;gene2315;gene12495	FAM49B;LOC106030066;PTPN22
3	GO:1903039	BP	positive regulation of leukocyte cell-cell adhesion	3/ 120	31/ 12028	0.0967742	0.00355081	1	gene9941;gene2315;gene12495	FAM49B;LOC106030066;PTPN22
5	GO:0051276	BP	chromosome organization	5/ 120	108/ 12028	0.0462963	0.00447723	1	gene18427;gene19763;gene18285;gene9507;gene5161	NUF2;GINS2;NCAPH;LOC106037928;LOC106033135
3	GO:0050920	BP	regulation of chemotaxis	3/ 120	34/ 12028	0.0882353	0.0046256	1	gene9870;gene7610;gene9713	LOC106038357;RAC2;PLA2G7
11	GO:0048584	BP	positive regulation of response to stimulus	11/ 120	445/ 12028	0.0247191	0.00486635	1	gene7610;gene7614;gene16004;gene3669;gene12495;gene10080;gene17307;gene7658;gene9941;gene9870;gene9713	RAC2;MFNG;SYK;TRAF5;PTPN22;XIAP;THEMIS2;TAB1;FAM49B;LOC106038357;PLA2G7
3	GO:0019221	BP	cytokine-mediated signaling pathway	3/ 120	35/ 12028	0.0857143	0.00502283	1	gene8744;gene11335;gene19459	TRAF2;STAT4;IRF5
2	GO:0050853	BP	B cell receptor signaling pathway	2/ 120	11/ 12028	0.181818	0.00511878	1	gene16004;gene7658	SYK;TAB1
2	GO:0071675	BP	regulation of mononuclear cell migration	2/ 120	11/ 12028	0.181818	0.00511878	1	gene9870;gene9713	LOC106038357;PLA2G7
3	GO:0022409	BP	positive regulation of cell-cell adhesion	3/ 120	36/ 12028	0.0833333	0.00544003	1	gene9941;gene2315;gene12495	FAM49B;LOC106030066;PTPN22
3	GO:0030098	BP	lymphocyte differentiation	3/ 120	37/ 12028	0.0810811	0.00587745	1	gene15751;gene12495;gene7614	BCL6;PTPN22;MFNG
5	GO:0007264	BP	small GTPase mediated signal transduction	5/ 120	116/ 12028	0.0431034	0.00605021	1	gene10067;gene7610;gene15751;gene14021;gene14267	LOC106038552;RAC2;BCL6;DOCK8;LOC106043193
2	GO:0044774	BP	mitotic DNA integrity checkpoint	2/ 120	12/ 12028	0.166667	0.00610264	1	gene14690;gene8089	TIPIN;TICRR
2	GO:0002706	BP	regulation of lymphocyte mediated immunity	2/ 120	12/ 12028	0.166667	0.00610264	1	gene9941;gene15751	FAM49B;BCL6
5	GO:0030155	BP	regulation of cell adhesion	5/ 120	118/ 12028	0.0423729	0.00649732	1	gene9941;gene2315;gene7610;gene15751;gene12495	FAM49B;LOC106030066;RAC2;BCL6;PTPN22
4	GO:0051301	BP	cell division	4/ 120	78/ 12028	0.0512821	0.00762009	1	gene18427;gene14690;gene18285;gene4700	NUF2;TIPIN;NCAPH;CDC23
3	GO:1903037	BP	regulation of leukocyte cell-cell adhesion	3/ 120	41/ 12028	0.0731707	0.00783433	1	gene9941;gene2315;gene12495	FAM49B;LOC106030066;PTPN22
2	GO:0002822	BP	regulation of adaptive immune response based on somatic recombination of immune receptors built from immunoglobulin superfamily domains	2/ 120	15/ 12028	0.133333	0.00952105	1	gene9941;gene15751	FAM49B;BCL6
1	GO:1900165	BP	negative regulation of interleukin-6 secretion	1/ 120	1/ 12028	1	0.00997672	1	gene12495	PTPN22
1	GO:0042092	BP	type 2 immune response	1/ 120	1/ 12028	1	0.00997672	1	gene15751	BCL6
1	GO:0043380	BP	regulation of memory T cell differentiation	1/ 120	1/ 12028	1	0.00997672	1	gene15751	BCL6
1	GO:0070544	BP	histone H3-K36 demethylation	1/ 120	1/ 12028	1	0.00997672	1	gene1335	LOC106040700
1	GO:0034441	BP	plasma lipoprotein particle oxidation	1/ 120	1/ 12028	1	0.00997672	1	gene9713	PLA2G7
1	GO:1900044	BP	regulation of protein K63-linked ubiquitination	1/ 120	1/ 12028	1	0.00997672	1	gene12495	PTPN22
1	GO:2000568	BP	positive regulation of memory T cell activation	1/ 120	1/ 12028	1	0.00997672	1	gene9941	FAM49B
1	GO:2000567	BP	regulation of memory T cell activation	1/ 120	1/ 12028	1	0.00997672	1	gene9941	FAM49B
1	GO:1902523	BP	positive regulation of protein K63-linked ubiquitination	1/ 120	1/ 12028	1	0.00997672	1	gene12495	PTPN22
1	GO:0032764	BP	negative regulation of mast cell cytokine production	1/ 120	1/ 12028	1	0.00997672	1	gene15751	BCL6
1	GO:0035547	BP	regulation of interferon-beta secretion	1/ 120	1/ 12028	1	0.00997672	1	gene12495	PTPN22
1	GO:0035549	BP	positive regulation of interferon-beta secretion	1/ 120	1/ 12028	1	0.00997672	1	gene12495	PTPN22
1	GO:2000566	BP	positive regulation of CD8-positive, alpha-beta T cell proliferation	1/ 120	1/ 12028	1	0.00997672	1	gene12495	PTPN22
1	GO:2000564	BP	regulation of CD8-positive, alpha-beta T cell proliferation	1/ 120	1/ 12028	1	0.00997672	1	gene12495	PTPN22
1	GO:0046794	BP	transport of virus	1/ 120	1/ 12028	1	0.00997672	1	gene6479	KPNA2
1	GO:1902579	BP	multi-organism localization	1/ 120	1/ 12028	1	0.00997672	1	gene6479	KPNA2
1	GO:2000325	BP	regulation of nuclear receptor transcription coactivator activity	1/ 120	1/ 12028	1	0.00997672	1	gene4828	CNOT6
1	GO:2000327	BP	positive regulation of nuclear receptor transcription coactivator activity	1/ 120	1/ 12028	1	0.00997672	1	gene4828	CNOT6
1	GO:0048294	BP	negative regulation of isotype switching to IgE isotypes	1/ 120	1/ 12028	1	0.00997672	1	gene15751	BCL6
1	GO:0048293	BP	regulation of isotype switching to IgE isotypes	1/ 120	1/ 12028	1	0.00997672	1	gene15751	BCL6
1	GO:0075732	BP	viral penetration into host nucleus	1/ 120	1/ 12028	1	0.00997672	1	gene6479	KPNA2
1	GO:0075733	BP	intracellular transport of virus	1/ 120	1/ 12028	1	0.00997672	1	gene6479	KPNA2
1	GO:0044766	BP	multi-organism transport	1/ 120	1/ 12028	1	0.00997672	1	gene6479	KPNA2
1	GO:0035644	BP	phosphoanandamide dephosphorylation	1/ 120	1/ 12028	1	0.00997672	1	gene12495	PTPN22
1	GO:0033314	BP	mitotic DNA replication checkpoint	1/ 120	1/ 12028	1	0.00997672	1	gene8089	TICRR
1	GO:0071663	BP	positive regulation of granzyme B production	1/ 120	1/ 12028	1	0.00997672	1	gene12495	PTPN22
1	GO:0071661	BP	regulation of granzyme B production	1/ 120	1/ 12028	1	0.00997672	1	gene12495	PTPN22
1	GO:0032763	BP	regulation of mast cell cytokine production	1/ 120	1/ 12028	1	0.00997672	1	gene15751	BCL6
1	GO:0002890	BP	negative regulation of immunoglobulin mediated immune response	1/ 120	1/ 12028	1	0.00997672	1	gene15751	BCL6
1	GO:0070084	BP	protein initiator methionine removal	1/ 120	1/ 12028	1	0.00997672	1	gene19480	METAP1
1	GO:0048478	BP	replication fork protection	1/ 120	1/ 12028	1	0.00997672	1	gene14690	TIPIN
1	GO:0045829	BP	negative regulation of isotype switching	1/ 120	1/ 12028	1	0.00997672	1	gene15751	BCL6
1	GO:0075506	BP	entry of viral genome into host nucleus through nuclear pore complex via importin	1/ 120	1/ 12028	1	0.00997672	1	gene6479	KPNA2
1	GO:0043111	BP	replication fork arrest	1/ 120	1/ 12028	1	0.00997672	1	gene14690	TIPIN
1	GO:0002713	BP	negative regulation of B cell mediated immunity	1/ 120	1/ 12028	1	0.00997672	1	gene15751	BCL6
2	GO:0051250	BP	negative regulation of lymphocyte activation	2/ 120	16/ 12028	0.125	0.0108107	1	gene15751;gene12495	BCL6;PTPN22
3	GO:0006402	BP	mRNA catabolic process	3/ 120	47/ 12028	0.0638298	0.0114135	1	gene16565;gene9507;gene4828	SMG8;LOC106037928;CNOT6
5	GO:1903047	BP	mitotic cell cycle process	5/ 120	137/ 12028	0.0364964	0.0119573	1	gene18427;gene14690;gene18285;gene8089;gene5173	NUF2;TIPIN;NCAPH;TICRR;E2F4
2	GO:0048285	BP	organelle fission	2/ 120	17/ 12028	0.117647	0.0121729	1	gene9507;gene4552	LOC106037928;MTFR2
3	GO:0016311	BP	dephosphorylation	3/ 120	49/ 12028	0.0612245	0.0127836	1	gene14041;gene12495;gene14042	LOC106043005;PTPN22;INPPL1
5	GO:0008284	BP	positive regulation of cell population proliferation	5/ 120	141/ 12028	0.035461	0.0134121	1	gene14690;gene4828;gene7610;gene15751;gene12495	TIPIN;CNOT6;RAC2;BCL6;PTPN22
8	GO:0042981	BP	regulation of apoptotic process	8/ 120	315/ 12028	0.0253968	0.0135212	1	gene8744;gene10080;gene14384;gene13934;gene15751;gene9507;gene18300;gene3669	TRAF2;XIAP;BCL2A1;RBM5;BCL6;LOC106037928;RASSF2;TRAF5
2	GO:0050852	BP	T cell receptor signaling pathway	2/ 120	18/ 12028	0.111111	0.0136059	1	gene17307;gene12495	THEMIS2;PTPN22
2	GO:0070665	BP	positive regulation of leukocyte proliferation	2/ 120	18/ 12028	0.111111	0.0136059	1	gene15751;gene12495	BCL6;PTPN22
2	GO:0050671	BP	positive regulation of lymphocyte proliferation	2/ 120	18/ 12028	0.111111	0.0136059	1	gene15751;gene12495	BCL6;PTPN22
2	GO:0046856	BP	phosphatidylinositol dephosphorylation	2/ 120	18/ 12028	0.111111	0.0136059	1	gene14041;gene14042	LOC106043005;INPPL1
2	GO:0032946	BP	positive regulation of mononuclear cell proliferation	2/ 120	18/ 12028	0.111111	0.0136059	1	gene15751;gene12495	BCL6;PTPN22
8	GO:0043067	BP	regulation of programmed cell death	8/ 120	320/ 12028	0.025	0.0147445	1	gene8744;gene10080;gene14384;gene13934;gene15751;gene9507;gene18300;gene3669	TRAF2;XIAP;BCL2A1;RBM5;BCL6;LOC106037928;RASSF2;TRAF5
2	GO:0030183	BP	B cell differentiation	2/ 120	19/ 12028	0.105263	0.0151084	1	gene15751;gene7614	BCL6;MFNG
2	GO:0002695	BP	negative regulation of leukocyte activation	2/ 120	19/ 12028	0.105263	0.0151084	1	gene15751;gene12495	BCL6;PTPN22
2	GO:0050866	BP	negative regulation of cell activation	2/ 120	20/ 12028	0.1	0.0166787	1	gene15751;gene12495	BCL6;PTPN22
2	GO:0002819	BP	regulation of adaptive immune response	2/ 120	20/ 12028	0.1	0.0166787	1	gene9941;gene15751	FAM49B;BCL6
3	GO:0006401	BP	RNA catabolic process	3/ 120	55/ 12028	0.0545455	0.0174373	1	gene16565;gene9507;gene4828	SMG8;LOC106037928;CNOT6
1	GO:1902914	BP	regulation of protein polyubiquitination	1/ 120	2/ 12028	0.5	0.0198547	1	gene12495	PTPN22
1	GO:1902916	BP	positive regulation of protein polyubiquitination	1/ 120	2/ 12028	0.5	0.0198547	1	gene12495	PTPN22
1	GO:0046469	BP	platelet activating factor metabolic process	1/ 120	2/ 12028	0.5	0.0198547	1	gene9713	PLA2G7
1	GO:0000185	BP	activation of MAPKKK activity	1/ 120	2/ 12028	0.5	0.0198547	1	gene7658	TAB1
1	GO:0002315	BP	marginal zone B cell differentiation	1/ 120	2/ 12028	0.5	0.0198547	1	gene7614	MFNG
1	GO:0034157	BP	positive regulation of toll-like receptor 7 signaling pathway	1/ 120	2/ 12028	0.5	0.0198547	1	gene12495	PTPN22
1	GO:0034155	BP	regulation of toll-like receptor 7 signaling pathway	1/ 120	2/ 12028	0.5	0.0198547	1	gene12495	PTPN22
1	GO:0099527	BP	postsynapse to nucleus signaling pathway	1/ 120	2/ 12028	0.5	0.0198547	1	gene6479	KPNA2
1	GO:0071593	BP	lymphocyte aggregation	1/ 120	2/ 12028	0.5	0.0198547	1	gene7610	RAC2
1	GO:0002823	BP	negative regulation of adaptive immune response based on somatic recombination of immune receptors built from immunoglobulin superfamily domains	1/ 120	2/ 12028	0.5	0.0198547	1	gene15751	BCL6
1	GO:0002820	BP	negative regulation of adaptive immune response	1/ 120	2/ 12028	0.5	0.0198547	1	gene15751	BCL6
1	GO:0070486	BP	leukocyte aggregation	1/ 120	2/ 12028	0.5	0.0198547	1	gene7610	RAC2
1	GO:0002467	BP	germinal center formation	1/ 120	2/ 12028	0.5	0.0198547	1	gene15751	BCL6
1	GO:0046641	BP	positive regulation of alpha-beta T cell proliferation	1/ 120	2/ 12028	0.5	0.0198547	1	gene12495	PTPN22
1	GO:0002707	BP	negative regulation of lymphocyte mediated immunity	1/ 120	2/ 12028	0.5	0.0198547	1	gene15751	BCL6
1	GO:0034165	BP	positive regulation of toll-like receptor 9 signaling pathway	1/ 120	2/ 12028	0.5	0.0198547	1	gene12495	PTPN22
1	GO:2001187	BP	positive regulation of CD8-positive, alpha-beta T cell activation	1/ 120	2/ 12028	0.5	0.0198547	1	gene12495	PTPN22
1	GO:2001185	BP	regulation of CD8-positive, alpha-beta T cell activation	1/ 120	2/ 12028	0.5	0.0198547	1	gene12495	PTPN22
1	GO:0001916	BP	positive regulation of T cell mediated cytotoxicity	1/ 120	2/ 12028	0.5	0.0198547	1	gene9941	FAM49B
1	GO:0034720	BP	histone H3-K4 demethylation	1/ 120	2/ 12028	0.5	0.0198547	1	gene1335	LOC106040700
1	GO:0043366	BP	beta selection	1/ 120	2/ 12028	0.5	0.0198547	1	gene16004	SYK
1	GO:0000083	BP	regulation of transcription involved in G1/S transition of mitotic cell cycle	1/ 120	2/ 12028	0.5	0.0198547	1	gene5173	E2F4
1	GO:0070966	BP	nuclear-transcribed mRNA catabolic process, no-go decay	1/ 120	2/ 12028	0.5	0.0198547	1	gene4828	CNOT6
1	GO:0060753	BP	regulation of mast cell chemotaxis	1/ 120	2/ 12028	0.5	0.0198547	1	gene7610	RAC2
3	GO:0022407	BP	regulation of cell-cell adhesion	3/ 120	58/ 12028	0.0517241	0.0200735	1	gene9941;gene2315;gene12495	FAM49B;LOC106030066;PTPN22
8	GO:0010941	BP	regulation of cell death	8/ 120	339/ 12028	0.0235988	0.0201352	1	gene8744;gene10080;gene14384;gene13934;gene15751;gene9507;gene18300;gene3669	TRAF2;XIAP;BCL2A1;RBM5;BCL6;LOC106037928;RASSF2;TRAF5
6	GO:0022402	BP	cell cycle process	6/ 120	216/ 12028	0.0277778	0.0210629	1	gene18285;gene18427;gene9507;gene14690;gene8089;gene5173	NCAPH;NUF2;LOC106037928;TIPIN;TICRR;E2F4
4	GO:0051272	BP	positive regulation of cellular component movement	4/ 120	106/ 12028	0.0377358	0.0214784	1	gene9870;gene7610;gene15751;gene9713	LOC106038357;RAC2;BCL6;PLA2G7
2	GO:0007266	BP	Rho protein signal transduction	2/ 120	23/ 12028	0.0869565	0.0217824	1	gene7610;gene15751	RAC2;BCL6
2	GO:0002700	BP	regulation of production of molecular mediator of immune response	2/ 120	23/ 12028	0.0869565	0.0217824	1	gene15751;gene12495	BCL6;PTPN22
2	GO:0046839	BP	phospholipid dephosphorylation	2/ 120	23/ 12028	0.0869565	0.0217824	1	gene14041;gene14042	LOC106043005;INPPL1
3	GO:0006913	BP	nucleocytoplasmic transport	3/ 120	60/ 12028	0.05	0.0219463	1	gene16744;gene6479;gene17963	STRADA;KPNA2;GLE1
3	GO:0051169	BP	nuclear transport	3/ 120	61/ 12028	0.0491803	0.0229173	1	gene16744;gene6479;gene17963	STRADA;KPNA2;GLE1
2	GO:0006367	BP	transcription initiation from RNA polymerase II promoter	2/ 120	24/ 12028	0.0833333	0.0236097	1	gene12122;gene3968	TAF4;TAF5
3	GO:0045785	BP	positive regulation of cell adhesion	3/ 120	63/ 12028	0.047619	0.0249287	1	gene9941;gene2315;gene12495	FAM49B;LOC106030066;PTPN22
2	GO:0031398	BP	positive regulation of protein ubiquitination	2/ 120	25/ 12028	0.08	0.0254977	1	gene12495;gene10080	PTPN22;XIAP
3	GO:0046649	BP	lymphocyte activation	3/ 120	64/ 12028	0.046875	0.025969	1	gene15751;gene12495;gene7614	BCL6;PTPN22;MFNG
5	GO:0032101	BP	regulation of response to external stimulus	5/ 120	168/ 12028	0.0297619	0.0264169	1	gene9870;gene9713;gene15751;gene12495;gene7610	LOC106038357;PLA2G7;BCL6;PTPN22;RAC2
5	GO:0006955	BP	immune response	5/ 120	170/ 12028	0.0294118	0.0276163	1	gene9870;gene18476;gene15751;gene2313;gene2314	LOC106038357;CD4;BCL6;CD28;CTLA4
3	GO:0007265	BP	Ras protein signal transduction	3/ 120	66/ 12028	0.0454545	0.0281188	1	gene10067;gene7610;gene15751	LOC106038552;RAC2;BCL6
1	GO:0060263	BP	regulation of respiratory burst	1/ 120	3/ 12028	0.333333	0.029635	1	gene7610	RAC2
1	GO:0016601	BP	Rac protein signal transduction	1/ 120	3/ 12028	0.333333	0.029635	1	gene7610	RAC2
1	GO:0035280	BP	miRNA loading onto RISC involved in gene silencing by miRNA	1/ 120	3/ 12028	0.333333	0.029635	1	gene9507	LOC106037928
1	GO:1902624	BP	positive regulation of neutrophil migration	1/ 120	3/ 12028	0.333333	0.029635	1	gene7610	RAC2
1	GO:0010501	BP	RNA secondary structure unwinding	1/ 120	3/ 12028	0.333333	0.029635	1	gene9507	LOC106037928
1	GO:0008015	BP	blood circulation	1/ 120	3/ 12028	0.333333	0.029635	1	gene5173	E2F4
1	GO:2000483	BP	negative regulation of interleukin-8 secretion	1/ 120	3/ 12028	0.333333	0.029635	1	gene12495	PTPN22
1	GO:0070425	BP	negative regulation of nucleotide-binding oligomerization domain containing signaling pathway	1/ 120	3/ 12028	0.333333	0.029635	1	gene12495	PTPN22
1	GO:0070424	BP	regulation of nucleotide-binding oligomerization domain containing signaling pathway	1/ 120	3/ 12028	0.333333	0.029635	1	gene12495	PTPN22
1	GO:0002829	BP	negative regulation of type 2 immune response	1/ 120	3/ 12028	0.333333	0.029635	1	gene15751	BCL6
1	GO:0031295	BP	T cell costimulation	1/ 120	3/ 12028	0.333333	0.029635	1	gene2315	LOC106030066
1	GO:0031294	BP	lymphocyte costimulation	1/ 120	3/ 12028	0.333333	0.029635	1	gene2315	LOC106030066
1	GO:0071225	BP	cellular response to muramyl dipeptide	1/ 120	3/ 12028	0.333333	0.029635	1	gene12495	PTPN22
1	GO:1902741	BP	positive regulation of interferon-alpha secretion	1/ 120	3/ 12028	0.333333	0.029635	1	gene12495	PTPN22
1	GO:0035904	BP	aorta development	1/ 120	3/ 12028	0.333333	0.029635	1	gene7658	TAB1
1	GO:0097341	BP	zymogen inhibition	1/ 120	3/ 12028	0.333333	0.029635	1	gene10080	XIAP
1	GO:0097340	BP	inhibition of cysteine-type endopeptidase activity	1/ 120	3/ 12028	0.333333	0.029635	1	gene10080	XIAP
1	GO:0046640	BP	regulation of alpha-beta T cell proliferation	1/ 120	3/ 12028	0.333333	0.029635	1	gene12495	PTPN22
1	GO:0002704	BP	negative regulation of leukocyte mediated immunity	1/ 120	3/ 12028	0.333333	0.029635	1	gene15751	BCL6
1	GO:0034163	BP	regulation of toll-like receptor 9 signaling pathway	1/ 120	3/ 12028	0.333333	0.029635	1	gene12495	PTPN22
1	GO:0001914	BP	regulation of T cell mediated cytotoxicity	1/ 120	3/ 12028	0.333333	0.029635	1	gene9941	FAM49B
1	GO:0034145	BP	positive regulation of toll-like receptor 4 signaling pathway	1/ 120	3/ 12028	0.333333	0.029635	1	gene12495	PTPN22
1	GO:0034141	BP	positive regulation of toll-like receptor 3 signaling pathway	1/ 120	3/ 12028	0.333333	0.029635	1	gene12495	PTPN22
1	GO:0071624	BP	positive regulation of granulocyte chemotaxis	1/ 120	3/ 12028	0.333333	0.029635	1	gene7610	RAC2
1	GO:1903753	BP	negative regulation of p38MAPK cascade	1/ 120	3/ 12028	0.333333	0.029635	1	gene12495	PTPN22
1	GO:0090023	BP	positive regulation of neutrophil chemotaxis	1/ 120	3/ 12028	0.333333	0.029635	1	gene7610	RAC2
1	GO:1990001	BP	inhibition of cysteine-type endopeptidase activity involved in apoptotic process	1/ 120	3/ 12028	0.333333	0.029635	1	gene10080	XIAP
1	GO:0050691	BP	regulation of defense response to virus by host	1/ 120	3/ 12028	0.333333	0.029635	1	gene12495	PTPN22
1	GO:0060840	BP	artery development	1/ 120	3/ 12028	0.333333	0.029635	1	gene7658	TAB1
1	GO:0007168	BP	receptor guanylyl cyclase signaling pathway	1/ 120	3/ 12028	0.333333	0.029635	1	gene11139	PDZD3
1	GO:0070432	BP	regulation of nucleotide-binding oligomerization domain containing 2 signaling pathway	1/ 120	3/ 12028	0.333333	0.029635	1	gene12495	PTPN22
1	GO:0070433	BP	negative regulation of nucleotide-binding oligomerization domain containing 2 signaling pathway	1/ 120	3/ 12028	0.333333	0.029635	1	gene12495	PTPN22
1	GO:0034374	BP	low-density lipoprotein particle remodeling	1/ 120	3/ 12028	0.333333	0.029635	1	gene9713	PLA2G7
1	GO:0010603	BP	regulation of cytoplasmic mRNA processing body assembly	1/ 120	3/ 12028	0.333333	0.029635	1	gene4828	CNOT6
1	GO:0010606	BP	positive regulation of cytoplasmic mRNA processing body assembly	1/ 120	3/ 12028	0.333333	0.029635	1	gene4828	CNOT6
1	GO:0002638	BP	negative regulation of immunoglobulin production	1/ 120	3/ 12028	0.333333	0.029635	1	gene15751	BCL6
1	GO:0006607	BP	NLS-bearing protein import into nucleus	1/ 120	3/ 12028	0.333333	0.029635	1	gene6479	KPNA2
1	GO:1902739	BP	regulation of interferon-alpha secretion	1/ 120	3/ 12028	0.333333	0.029635	1	gene12495	PTPN22
1	GO:0002230	BP	positive regulation of defense response to virus by host	1/ 120	3/ 12028	0.333333	0.029635	1	gene12495	PTPN22
1	GO:0006419	BP	alanyl-tRNA aminoacylation	1/ 120	3/ 12028	0.333333	0.029635	1	gene2015	AARS2
1	GO:0045191	BP	regulation of isotype switching	1/ 120	3/ 12028	0.333333	0.029635	1	gene15751	BCL6
3	GO:0030258	BP	lipid modification	3/ 120	68/ 12028	0.0441176	0.0303606	1	gene9713;gene14041;gene14042	PLA2G7;LOC106043005;INPPL1
2	GO:0031570	BP	DNA integrity checkpoint	2/ 120	28/ 12028	0.0714286	0.0315123	1	gene14690;gene8089	TIPIN;TICRR
2	GO:0071103	BP	DNA conformation change	2/ 120	29/ 12028	0.0689655	0.0336296	1	gene19763;gene18285	GINS2;NCAPH
2	GO:0007093	BP	mitotic cell cycle checkpoint	2/ 120	29/ 12028	0.0689655	0.0336296	1	gene14690;gene8089	TIPIN;TICRR
3	GO:0032103	BP	positive regulation of response to external stimulus	3/ 120	72/ 12028	0.0416667	0.0351184	1	gene9870;gene7610;gene9713	LOC106038357;RAC2;PLA2G7
2	GO:1903322	BP	positive regulation of protein modification by small protein conjugation or removal	2/ 120	30/ 12028	0.0666667	0.035801	1	gene12495;gene10080	PTPN22;XIAP
2	GO:0008360	BP	regulation of cell shape	2/ 120	31/ 12028	0.0645161	0.0380252	1	gene16015;gene17622	CDC42SE2;FMNL1
1	GO:2000104	BP	negative regulation of DNA-dependent DNA replication	1/ 120	4/ 12028	0.25	0.0393185	1	gene14690	TIPIN
1	GO:1902622	BP	regulation of neutrophil migration	1/ 120	4/ 12028	0.25	0.0393185	1	gene7610	RAC2
1	GO:0034139	BP	regulation of toll-like receptor 3 signaling pathway	1/ 120	4/ 12028	0.25	0.0393185	1	gene12495	PTPN22
1	GO:0000266	BP	mitochondrial fission	1/ 120	4/ 12028	0.25	0.0393185	1	gene4552	MTFR2
1	GO:0002889	BP	regulation of immunoglobulin mediated immune response	1/ 120	4/ 12028	0.25	0.0393185	1	gene15751	BCL6
1	GO:0051315	BP	attachment of mitotic spindle microtubules to kinetochore	1/ 120	4/ 12028	0.25	0.0393185	1	gene18427	NUF2
1	GO:0040033	BP	negative regulation of translation, ncRNA-mediated	1/ 120	4/ 12028	0.25	0.0393185	1	gene9507	LOC106037928
1	GO:0002828	BP	regulation of type 2 immune response	1/ 120	4/ 12028	0.25	0.0393185	1	gene15751	BCL6
1	GO:0031054	BP	pre-miRNA processing	1/ 120	4/ 12028	0.25	0.0393185	1	gene9507	LOC106037928
1	GO:0070076	BP	histone lysine demethylation	1/ 120	4/ 12028	0.25	0.0393185	1	gene1335	LOC106040700
1	GO:0045974	BP	regulation of translation, ncRNA-mediated	1/ 120	4/ 12028	0.25	0.0393185	1	gene9507	LOC106037928
1	GO:0016233	BP	telomere capping	1/ 120	4/ 12028	0.25	0.0393185	1	gene5161	LOC106033135
1	GO:0031573	BP	intra-S DNA damage checkpoint	1/ 120	4/ 12028	0.25	0.0393185	1	gene14690	TIPIN
1	GO:0035278	BP	miRNA mediated inhibition of translation	1/ 120	4/ 12028	0.25	0.0393185	1	gene9507	LOC106037928
1	GO:0048821	BP	erythrocyte development	1/ 120	4/ 12028	0.25	0.0393185	1	gene15751	BCL6
1	GO:0090022	BP	regulation of neutrophil chemotaxis	1/ 120	4/ 12028	0.25	0.0393185	1	gene7610	RAC2
1	GO:0036066	BP	protein O-linked fucosylation	1/ 120	4/ 12028	0.25	0.0393185	1	gene7614	MFNG
1	GO:0070922	BP	small RNA loading onto RISC	1/ 120	4/ 12028	0.25	0.0393185	1	gene9507	LOC106037928
1	GO:0030890	BP	positive regulation of B cell proliferation	1/ 120	4/ 12028	0.25	0.0393185	1	gene15751	BCL6
1	GO:0002712	BP	regulation of B cell mediated immunity	1/ 120	4/ 12028	0.25	0.0393185	1	gene15751	BCL6
1	GO:0002719	BP	negative regulation of cytokine production involved in immune response	1/ 120	4/ 12028	0.25	0.0393185	1	gene15751	BCL6
2	GO:1903046	BP	meiotic cell cycle process	2/ 120	34/ 12028	0.0588235	0.0450019	1	gene18427;gene9507	NUF2;LOC106037928
2	GO:0051168	BP	nuclear export	2/ 120	34/ 12028	0.0588235	0.0450019	1	gene16744;gene17963	STRADA;GLE1
2	GO:0042113	BP	B cell activation	2/ 120	34/ 12028	0.0588235	0.0450019	1	gene15751;gene7614	BCL6;MFNG
3	GO:0034655	BP	nucleobase-containing compound catabolic process	3/ 120	80/ 12028	0.0375	0.045715	1	gene16565;gene9507;gene4828	SMG8;LOC106037928;CNOT6
1	GO:0000289	BP	nuclear-transcribed mRNA poly(A) tail shortening	1/ 120	5/ 12028	0.2	0.0489061	1	gene4828	CNOT6
1	GO:0032717	BP	negative regulation of interleukin-8 production	1/ 120	5/ 12028	0.2	0.0489061	1	gene12495	PTPN22
1	GO:0008214	BP	protein dealkylation	1/ 120	5/ 12028	0.2	0.0489061	1	gene1335	LOC106040700
1	GO:0010586	BP	miRNA metabolic process	1/ 120	5/ 12028	0.2	0.0489061	1	gene9507	LOC106037928
1	GO:0007159	BP	leukocyte cell-cell adhesion	1/ 120	5/ 12028	0.2	0.0489061	1	gene7610	RAC2
1	GO:0044818	BP	mitotic G2/M transition checkpoint	1/ 120	5/ 12028	0.2	0.0489061	1	gene8089	TICRR
1	GO:0007130	BP	synaptonemal complex assembly	1/ 120	5/ 12028	0.2	0.0489061	1	gene9507	LOC106037928
1	GO:0016577	BP	histone demethylation	1/ 120	5/ 12028	0.2	0.0489061	1	gene1335	LOC106040700
1	GO:2000482	BP	regulation of interleukin-8 secretion	1/ 120	5/ 12028	0.2	0.0489061	1	gene12495	PTPN22
1	GO:0010955	BP	negative regulation of protein processing	1/ 120	5/ 12028	0.2	0.0489061	1	gene10080	XIAP
1	GO:0000727	BP	double-strand break repair via break-induced replication	1/ 120	5/ 12028	0.2	0.0489061	1	gene19763	GINS2
1	GO:1903318	BP	negative regulation of protein maturation	1/ 120	5/ 12028	0.2	0.0489061	1	gene10080	XIAP
1	GO:0034143	BP	regulation of toll-like receptor 4 signaling pathway	1/ 120	5/ 12028	0.2	0.0489061	1	gene12495	PTPN22
1	GO:0006482	BP	protein demethylation	1/ 120	5/ 12028	0.2	0.0489061	1	gene1335	LOC106040700
1	GO:0030316	BP	osteoclast differentiation	1/ 120	5/ 12028	0.2	0.0489061	1	gene4642	OSTM1
1	GO:0036065	BP	fucosylation	1/ 120	5/ 12028	0.2	0.0489061	1	gene7614	MFNG
1	GO:0007140	BP	male meiotic nuclear division	1/ 120	5/ 12028	0.2	0.0489061	1	gene9507	LOC106037928
5	GO:0051270	BP	regulation of cellular component movement	5/ 120	200/ 12028	0.025	0.0498307	1	gene9870;gene9713;gene15751;gene12495;gene7610	LOC106038357;PLA2G7;BCL6;PTPN22;RAC2
5	GO:0000785	CC	chromatin	5/ 120	105/ 12028	0.047619	0.0039709	1	gene13916;gene14690;gene12122;gene3968;gene5173	LOC106042836;TIPIN;TAF4;TAF5;E2F4
4	GO:0000790	CC	nuclear chromatin	4/ 120	72/ 12028	0.0555556	0.00575214	1	gene14690;gene12122;gene3968;gene5173	TIPIN;TAF4;TAF5;E2F4
2	GO:0009898	CC	cytoplasmic side of plasma membrane	2/ 120	13/ 12028	0.153846	0.00716539	1	gene12495;gene3669	PTPN22;TRAF5
2	GO:0070461	CC	SAGA-type complex	2/ 120	14/ 12028	0.142857	0.0083054	1	gene12122;gene3968	TAF4;TAF5
1	GO:0098890	CC	extrinsic component of postsynaptic membrane	1/ 120	1/ 12028	1	0.00997672	1	gene6479	KPNA2
1	GO:0098892	CC	extrinsic component of postsynaptic specialization membrane	1/ 120	1/ 12028	1	0.00997672	1	gene6479	KPNA2
1	GO:0000799	CC	nuclear condensin complex	1/ 120	1/ 12028	1	0.00997672	1	gene18285	NCAPH
1	GO:0043657	CC	host cell	1/ 120	1/ 12028	1	0.00997672	1	gene6479	KPNA2
1	GO:0099243	CC	extrinsic component of synaptic membrane	1/ 120	1/ 12028	1	0.00997672	1	gene6479	KPNA2
1	GO:0034362	CC	low-density lipoprotein particle	1/ 120	1/ 12028	1	0.00997672	1	gene9713	PLA2G7
2	GO:0005669	CC	transcription factor TFIID complex	2/ 120	16/ 12028	0.125	0.0108107	1	gene12122;gene3968	TAF4;TAF5
3	GO:0098552	CC	side of membrane	3/ 120	48/ 12028	0.0625	0.0120873	1	gene17923;gene12495;gene3669	TNFRSF9;PTPN22;TRAF5
2	GO:0098562	CC	cytoplasmic side of membrane	2/ 120	18/ 12028	0.111111	0.0136059	1	gene12495;gene3669	PTPN22;TRAF5
8	GO:0099080	CC	supramolecular complex	8/ 120	319/ 12028	0.0250784	0.0144936	1	gene7610;gene17622;gene9846;gene18427;gene15645;gene9507;gene7403;gene11741	RAC2;FMNL1;KIF15;NUF2;SLC1A4;LOC106037928;KIF2A;LMNB1
1	GO:0032783	CC	super elongation complex	1/ 120	2/ 12028	0.5	0.0198547	1	gene2096	EAF2
1	GO:0031528	CC	microvillus membrane	1/ 120	2/ 12028	0.5	0.0198547	1	gene18970	MYO1F
1	GO:0000811	CC	GINS complex	1/ 120	2/ 12028	0.5	0.0198547	1	gene19763	GINS2
1	GO:0031261	CC	DNA replication preinitiation complex	1/ 120	2/ 12028	0.5	0.0198547	1	gene19763	GINS2
1	GO:0070187	CC	shelterin complex	1/ 120	2/ 12028	0.5	0.0198547	1	gene5161	LOC106033135
1	GO:0042101	CC	T cell receptor complex	1/ 120	2/ 12028	0.5	0.0198547	1	gene16004	SYK
1	GO:0019815	CC	B cell receptor complex	1/ 120	2/ 12028	0.5	0.0198547	1	gene16004	SYK
5	GO:0005667	CC	transcription regulator complex	5/ 120	157/ 12028	0.0318471	0.0204192	1	gene1671;gene12122;gene3968;gene17183;gene5173	E2F7;TAF4;TAF5;TFDP1;E2F4
2	GO:0005884	CC	actin filament	2/ 120	23/ 12028	0.0869565	0.0217824	1	gene7610;gene17622	RAC2;FMNL1
6	GO:0099513	CC	polymeric cytoskeletal fiber	6/ 120	222/ 12028	0.027027	0.0237188	1	gene7610;gene17622;gene9846;gene15645;gene7403;gene11741	RAC2;FMNL1;KIF15;SLC1A4;KIF2A;LMNB1
13	GO:0005829	CC	cytosol	13/ 120	681/ 12028	0.0190896	0.0254577	1	gene18285;gene4642;gene8744;gene6479;gene6301;gene11335;gene9507;gene7610;gene3669;gene7658;gene16744;gene3858;gene12122	NCAPH;OSTM1;TRAF2;KPNA2;USP40;STAT4;LOC106037928;RAC2;TRAF5;TAB1;STRADA;G2E3;TAF4
1	GO:0000778	CC	condensed nuclear chromosome kinetochore	1/ 120	3/ 12028	0.333333	0.029635	1	gene18427	NUF2
1	GO:0035631	CC	CD40 receptor complex	1/ 120	3/ 12028	0.333333	0.029635	1	gene3669	TRAF5
1	GO:0070578	CC	RISC-loading complex	1/ 120	3/ 12028	0.333333	0.029635	1	gene9507	LOC106037928
1	GO:0031262	CC	Ndc80 complex	1/ 120	3/ 12028	0.333333	0.029635	1	gene18427	NUF2
1	GO:0019814	CC	immunoglobulin complex	1/ 120	3/ 12028	0.333333	0.029635	1	gene16004	SYK
22	GO:0005634	CC	nucleus	22/ 120	1434/ 12028	0.0153417	0.0338756	1	gene18427;gene12495;gene15751;gene7658;gene17183;gene1335;gene18285;gene6479;gene3533;gene19763;gene5173;gene10737;gene19625;gene16004;gene4828;gene10080;gene13916;gene17307;gene14690;gene11335;gene1671;gene8089	NUF2;PTPN22;BCL6;TAB1;TFDP1;LOC106040700;NCAPH;KPNA2;ANHX;GINS2;E2F4;MCM6;MIER2;SYK;CNOT6;XIAP;LOC106042836;THEMIS2;TIPIN;STAT4;E2F7;TICRR
6	GO:0099512	CC	supramolecular fiber	6/ 120	242/ 12028	0.0247934	0.0341717	1	gene7610;gene17622;gene9846;gene15645;gene7403;gene11741	RAC2;FMNL1;KIF15;SLC1A4;KIF2A;LMNB1
6	GO:0099081	CC	supramolecular polymer	6/ 120	242/ 12028	0.0247934	0.0341717	1	gene7610;gene17622;gene9846;gene15645;gene7403;gene11741	RAC2;FMNL1;KIF15;SLC1A4;KIF2A;LMNB1
1	GO:0018995	CC	host cellular component	1/ 120	4/ 12028	0.25	0.0393185	1	gene6479	KPNA2
1	GO:0000796	CC	condensin complex	1/ 120	4/ 12028	0.25	0.0393185	1	gene18285	NCAPH
1	GO:0000783	CC	nuclear telomere cap complex	1/ 120	4/ 12028	0.25	0.0393185	1	gene5161	LOC106033135
1	GO:0000782	CC	telomere cap complex	1/ 120	4/ 12028	0.25	0.0393185	1	gene5161	LOC106033135
1	GO:0032009	CC	early phagosome	1/ 120	4/ 12028	0.25	0.0393185	1	gene16004	SYK
16	GO:0005737	CC	cytoplasm	16/ 120	960/ 12028	0.0166667	0.0400778	1	gene4828;gene7610;gene2015;gene18427;gene6479;gene19480;gene3669;gene10080;gene12495;gene17307;gene16015;gene17900;gene14690;gene11335;gene16004;gene7619	CNOT6;RAC2;AARS2;NUF2;KPNA2;METAP1;TRAF5;XIAP;PTPN22;THEMIS2;CDC42SE2;KCNAB2;TIPIN;STAT4;SYK;SH3BP1
1	GO:0031332	CC	RNAi effector complex	1/ 120	5/ 12028	0.2	0.0489061	1	gene9507	LOC106037928
1	GO:0005622	CC	intracellular	1/ 120	5/ 12028	0.2	0.0489061	1	gene10067	LOC106038552
1	GO:0016442	CC	RISC complex	1/ 120	5/ 12028	0.2	0.0489061	1	gene9507	LOC106037928
2	GO:0004703	MF	G protein-coupled receptor kinase activity	2/ 120	10/ 12028	0.2	0.0042155	1	gene20461;gene556	ADRBK1;GRK4
6	GO:0008047	MF	enzyme activator activity	6/ 120	165/ 12028	0.0363636	0.00614607	1	gene18285;gene5524;gene7619;gene3533;gene7658;gene16744	NCAPH;ADAP1;SH3BP1;ANHX;TAB1;STRADA
6	GO:0016791	MF	phosphatase activity	6/ 120	175/ 12028	0.0342857	0.00811931	1	gene12504;gene12495;gene16540;gene13131;gene7658;gene18465	PPM1J;PTPN22;DUSP12;PTPRC;TAB1;PTPN6
2	GO:0005164	MF	tumor necrosis factor receptor binding	2/ 120	15/ 12028	0.133333	0.00952105	1	gene8744;gene3669	TRAF2;TRAF5
1	GO:0072586	MF	DNA topoisomerase type II (double strand cut, ATP-hydrolyzing) regulator activity	1/ 120	1/ 12028	1	0.00997672	1	gene18285	NCAPH
1	GO:0072587	MF	DNA topoisomerase type II (double strand cut, ATP-hydrolyzing) activator activity	1/ 120	1/ 12028	1	0.00997672	1	gene18285	NCAPH
1	GO:0044547	MF	DNA topoisomerase binding	1/ 120	1/ 12028	1	0.00997672	1	gene18285	NCAPH
1	GO:0034590	MF	L-hydroxyproline transmembrane transporter activity	1/ 120	1/ 12028	1	0.00997672	1	gene15645	SLC1A4
1	GO:0023030	MF	MHC class Ib protein binding, via antigen binding groove	1/ 120	1/ 12028	1	0.00997672	1	gene9941	FAM49B
1	GO:0015184	MF	L-cystine transmembrane transporter activity	1/ 120	1/ 12028	1	0.00997672	1	gene15645	SLC1A4
1	GO:0010852	MF	cyclase inhibitor activity	1/ 120	1/ 12028	1	0.00997672	1	gene11139	PDZD3
1	GO:0005220	MF	inositol 1,4,5-trisphosphate-sensitive calcium-release channel activity	1/ 120	1/ 12028	1	0.00997672	1	gene9741	ITPR2
1	GO:0016170	MF	interleukin-15 receptor binding	1/ 120	1/ 12028	1	0.00997672	1	gene16004	SYK
1	GO:0003847	MF	1-alkyl-2-acetylglycerophosphocholine esterase activity	1/ 120	1/ 12028	1	0.00997672	1	gene9713	PLA2G7
1	GO:0030251	MF	guanylate cyclase inhibitor activity	1/ 120	1/ 12028	1	0.00997672	1	gene11139	PDZD3
1	GO:0023029	MF	MHC class Ib protein binding	1/ 120	1/ 12028	1	0.00997672	1	gene9941	FAM49B
1	GO:0015195	MF	L-threonine transmembrane transporter activity	1/ 120	1/ 12028	1	0.00997672	1	gene15645	SLC1A4
2	GO:0032813	MF	tumor necrosis factor receptor superfamily binding	2/ 120	17/ 12028	0.117647	0.0121729	1	gene8744;gene3669	TRAF2;TRAF5
7	GO:0042578	MF	phosphoric ester hydrolase activity	7/ 120	251/ 12028	0.0278884	0.0128252	1	gene12504;gene16929;gene16540;gene12495;gene13131;gene7658;gene18465	PPM1J;SMPD2;DUSP12;PTPN22;PTPRC;TAB1;PTPN6
23	GO:0140096	MF	catalytic activity, acting on a protein	23/ 120	1393/ 12028	0.0165111	0.0139762	1	gene16540;gene12495;gene7658;gene16744;gene5176;gene1335;gene20751;gene11383;gene10291;gene12504;gene13918;gene3005;gene19480;gene16004;gene1157;gene20461;gene6301;gene10080;gene13131;gene556;gene3858;gene10479;gene18465	DUSP12;PTPN22;TAB1;STRADA;PSKH1;LOC106040700;LOC106029620;CLK1;AREL1;PPM1J;HEMK1;TXK;METAP1;SYK;STK4;ADRBK1;USP40;XIAP;PTPRC;GRK4;G2E3;LYN;PTPN6
13	GO:0098772	MF	molecular function regulator	13/ 120	653/ 12028	0.0199081	0.0144019	1	gene18285;gene5524;gene7619;gene10080;gene14021;gene3533;gene7610;gene14267;gene7658;gene16744;gene19516;gene11139;gene10548	NCAPH;ADAP1;SH3BP1;XIAP;DOCK8;ANHX;RAC2;LOC106043193;TAB1;STRADA;LOC106048981;PDZD3;LOC106039127
3	GO:0019887	MF	protein kinase regulator activity	3/ 120	57/ 12028	0.0526316	0.0191717	1	gene16744;gene7610;gene7658	STRADA;RAC2;TAB1
1	GO:0048273	MF	mitogen-activated protein kinase p38 binding	1/ 120	2/ 12028	0.5	0.0198547	1	gene7658	TAB1
1	GO:0051864	MF	histone demethylase activity (H3-K36 specific)	1/ 120	2/ 12028	0.5	0.0198547	1	gene1335	LOC106040700
1	GO:0033829	MF	O-fucosylpeptide 3-beta-N-acetylglucosaminyltransferase activity	1/ 120	2/ 12028	0.5	0.0198547	1	gene7614	MFNG
1	GO:0015193	MF	L-proline transmembrane transporter activity	1/ 120	2/ 12028	0.5	0.0198547	1	gene15645	SLC1A4
2	GO:0019209	MF	kinase activator activity	2/ 120	23/ 12028	0.0869565	0.0217824	1	gene16744;gene7658	STRADA;TAB1
2	GO:0030295	MF	protein kinase activator activity	2/ 120	23/ 12028	0.0869565	0.0217824	1	gene16744;gene7658	STRADA;TAB1
3	GO:0019207	MF	kinase regulator activity	3/ 120	63/ 12028	0.047619	0.0249287	1	gene16744;gene7610;gene7658	STRADA;RAC2;TAB1
1	GO:0022889	MF	serine transmembrane transporter activity	1/ 120	3/ 12028	0.333333	0.029635	1	gene15645	SLC1A4
1	GO:0032453	MF	histone demethylase activity (H3-K4 specific)	1/ 120	3/ 12028	0.333333	0.029635	1	gene1335	LOC106040700
1	GO:0047499	MF	calcium-independent phospholipase A2 activity	1/ 120	3/ 12028	0.333333	0.029635	1	gene9713	PLA2G7
1	GO:0030249	MF	guanylate cyclase regulator activity	1/ 120	3/ 12028	0.333333	0.029635	1	gene11139	PDZD3
1	GO:0000099	MF	sulfur amino acid transmembrane transporter activity	1/ 120	3/ 12028	0.333333	0.029635	1	gene15645	SLC1A4
1	GO:0043027	MF	cysteine-type endopeptidase inhibitor activity involved in apoptotic process	1/ 120	3/ 12028	0.333333	0.029635	1	gene10080	XIAP
1	GO:0010851	MF	cyclase regulator activity	1/ 120	3/ 12028	0.333333	0.029635	1	gene11139	PDZD3
1	GO:0072349	MF	modified amino acid transmembrane transporter activity	1/ 120	3/ 12028	0.333333	0.029635	1	gene15645	SLC1A4
1	GO:0015278	MF	calcium-release channel activity	1/ 120	3/ 12028	0.333333	0.029635	1	gene9741	ITPR2
1	GO:0030898	MF	actin-dependent ATPase activity	1/ 120	3/ 12028	0.333333	0.029635	1	gene18970	MYO1F
1	GO:0004813	MF	alanine-tRNA ligase activity	1/ 120	3/ 12028	0.333333	0.029635	1	gene2015	AARS2
1	GO:0015194	MF	L-serine transmembrane transporter activity	1/ 120	3/ 12028	0.333333	0.029635	1	gene15645	SLC1A4
3	GO:0004866	MF	endopeptidase inhibitor activity	3/ 120	70/ 12028	0.0428571	0.0326939	1	gene19516;gene10548;gene10080	LOC106048981;LOC106039127;XIAP
2	GO:0004722	MF	protein serine/threonine phosphatase activity	2/ 120	29/ 12028	0.0689655	0.0336296	1	gene12504;gene7658	PPM1J;TAB1
4	GO:0060589	MF	nucleoside-triphosphatase regulator activity	4/ 120	122/ 12028	0.0327869	0.0336819	1	gene3533;gene18285;gene5524;gene7619	ANHX;NCAPH;ADAP1;SH3BP1
3	GO:0061135	MF	endopeptidase regulator activity	3/ 120	71/ 12028	0.0422535	0.0338948	1	gene19516;gene10548;gene10080	LOC106048981;LOC106039127;XIAP
3	GO:0004713	MF	protein tyrosine kinase activity	3/ 120	71/ 12028	0.0422535	0.0338948	1	gene16004;gene10479;gene3005	SYK;LYN;TXK
3	GO:0030414	MF	peptidase inhibitor activity	3/ 120	74/ 12028	0.0405405	0.0376334	1	gene19516;gene10548;gene10080	LOC106048981;LOC106039127;XIAP
3	GO:0005126	MF	cytokine receptor binding	3/ 120	75/ 12028	0.04	0.0389247	1	gene8744;gene16004;gene3669	TRAF2;SYK;TRAF5
1	GO:0046920	MF	alpha-(1->3)-fucosyltransferase activity	1/ 120	4/ 12028	0.25	0.0393185	1	gene8754	FUT7
1	GO:0008139	MF	nuclear localization sequence binding	1/ 120	4/ 12028	0.25	0.0393185	1	gene6479	KPNA2
1	GO:0004724	MF	magnesium-dependent protein serine/threonine phosphatase activity	1/ 120	4/ 12028	0.25	0.0393185	1	gene7658	TAB1
1	GO:0022858	MF	alanine transmembrane transporter activity	1/ 120	4/ 12028	0.25	0.0393185	1	gene15645	SLC1A4
1	GO:0015180	MF	L-alanine transmembrane transporter activity	1/ 120	4/ 12028	0.25	0.0393185	1	gene15645	SLC1A4
1	GO:0016251	MF	RNA polymerase II general transcription initiation factor activity	1/ 120	4/ 12028	0.25	0.0393185	1	gene3968	TAF5
1	GO:0017162	MF	aryl hydrocarbon receptor binding	1/ 120	4/ 12028	0.25	0.0393185	1	gene12122	TAF4
1	GO:0140223	MF	general transcription initiation factor activity	1/ 120	4/ 12028	0.25	0.0393185	1	gene3968	TAF5
10	GO:0016773	MF	phosphotransferase activity, alcohol group as acceptor	10/ 120	525/ 12028	0.0190476	0.0415105	1	gene1157;gene20461;gene3005;gene11383;gene556;gene16744;gene5176;gene16004;gene1417;gene10479	STK4;ADRBK1;TXK;CLK1;GRK4;STRADA;PSKH1;SYK;DGKZ;LYN
3	GO:0061134	MF	peptidase regulator activity	3/ 120	80/ 12028	0.0375	0.045715	1	gene19516;gene10548;gene10080	LOC106048981;LOC106039127;XIAP
9	GO:0004672	MF	protein kinase activity	9/ 120	450/ 12028	0.02	0.0460217	1	gene1157;gene20461;gene3005;gene11383;gene556;gene16744;gene5176;gene16004;gene10479	STK4;ADRBK1;TXK;CLK1;GRK4;STRADA;PSKH1;SYK;LYN
3	GO:0004725	MF	protein tyrosine phosphatase activity	3/ 120	82/ 12028	0.0365854	0.048585	1	gene12495;gene18465;gene13131	PTPN22;PTPN6;PTPRC
11	GO:0019899	MF	enzyme binding	11/ 120	581/ 12028	0.0189329	0.0486575	1	gene18285;gene7610;gene17622;gene14267;gene6479;gene3669;gene12495;gene14021;gene16015;gene7658;gene16744	NCAPH;RAC2;FMNL1;LOC106043193;KPNA2;TRAF5;PTPN22;DOCK8;CDC42SE2;TAB1;STRADA
1	GO:0031996	MF	thioesterase binding	1/ 120	5/ 12028	0.2	0.0489061	1	gene3669	TRAF5
1	GO:0051019	MF	mitogen-activated protein kinase binding	1/ 120	5/ 12028	0.2	0.0489061	1	gene7658	TAB1
25	GO:0043168	MF	anion binding	25/ 120	1735/ 12028	0.0144092	0.0499658	1	gene2442;gene10067;gene2015;gene16744;gene5176;gene5347;gene5524;gene18090;gene18970;gene11383;gene9741;gene14963;gene9846;gene3005;gene10737;gene7403;gene7610;gene16004;gene1157;gene20461;gene19021;gene556;gene9713;gene1417;gene10479	SNX10;LOC106038552;AARS2;STRADA;PSKH1;SEPT12;ADAP1;SNX22;MYO1F;CLK1;ITPR2;DCK;KIF15;TXK;MCM6;KIF2A;RAC2;SYK;STK4;ADRBK1;RAB44;GRK4;PLA2G7;DGKZ;LYN

## Sheet: yellow
Number	GO ID	Term Type	Description	Ratio_in_study	Ratio_in_pop	Rich factor	Pvalue	Padjust	Gene_ids	Gene_names
7	GO:0050863	BP	regulation of T cell activation	7/ 120	45/ 12028	0.155556	2.74e-07	0.00380752	gene7610;gene12495;gene15751;gene9941;gene2313;gene2315;gene2314	RAC2;PTPN22;BCL6;FAM49B;CD28;LOC106030066;CTLA4
7	GO:0051249	BP	regulation of lymphocyte activation	7/ 120	58/ 12028	0.12069	1.63e-06	0.00994886	gene7610;gene12495;gene15751;gene9941;gene2313;gene2315;gene2314	RAC2;PTPN22;BCL6;FAM49B;CD28;LOC106030066;CTLA4
10	GO:0002684	BP	positive regulation of immune system process	10/ 120	148/ 12028	0.0675676	2.14e-06	0.00994886	gene7610;gene16004;gene12495;gene15751;gene17307;gene7658;gene9941;gene9870;gene9713;gene2315	RAC2;SYK;PTPN22;BCL6;THEMIS2;TAB1;FAM49B;LOC106038357;PLA2G7;LOC106030066
12	GO:0002682	BP	regulation of immune system process	12/ 120	237/ 12028	0.0506329	4.18e-06	0.0145383	gene7610;gene16004;gene12495;gene15751;gene17307;gene7658;gene9941;gene9870;gene2313;gene9713;gene2315;gene2314	RAC2;SYK;PTPN22;BCL6;THEMIS2;TAB1;FAM49B;LOC106038357;CD28;PLA2G7;LOC106030066;CTLA4
7	GO:0002694	BP	regulation of leukocyte activation	7/ 120	73/ 12028	0.0958904	7.8e-06	0.0211025	gene7610;gene12495;gene15751;gene9941;gene2313;gene2315;gene2314	RAC2;PTPN22;BCL6;FAM49B;CD28;LOC106030066;CTLA4
5	GO:0050670	BP	regulation of lymphocyte proliferation	5/ 120	30/ 12028	0.166667	1.06e-05	0.0211025	gene7610;gene2313;gene15751;gene12495;gene2314	RAC2;CD28;BCL6;PTPN22;CTLA4
5	GO:0032944	BP	regulation of mononuclear cell proliferation	5/ 120	30/ 12028	0.166667	1.06e-05	0.0211025	gene7610;gene2313;gene15751;gene12495;gene2314	RAC2;CD28;BCL6;PTPN22;CTLA4
7	GO:0050865	BP	regulation of cell activation	7/ 120	78/ 12028	0.0897436	1.21e-05	0.021118	gene7610;gene12495;gene15751;gene9941;gene2313;gene2315;gene2314	RAC2;PTPN22;BCL6;FAM49B;CD28;LOC106030066;CTLA4
5	GO:0070663	BP	regulation of leukocyte proliferation	5/ 120	32/ 12028	0.15625	1.48e-05	0.0228267	gene7610;gene2313;gene15751;gene12495;gene2314	RAC2;CD28;BCL6;PTPN22;CTLA4
4	GO:0042129	BP	regulation of T cell proliferation	4/ 120	23/ 12028	0.173913	7.21e-05	0.100303	gene2313;gene7610;gene12495;gene2314	CD28;RAC2;PTPN22;CTLA4
12	GO:0002376	BP	immune system process	12/ 120	319/ 12028	0.0376176	8e-05	0.101293	gene19459;gene7614;gene12495;gene2314;gene15751;gene17307;gene7658;gene9870;gene18476;gene16004;gene2315;gene2313	IRF5;MFNG;PTPN22;CTLA4;BCL6;THEMIS2;TAB1;LOC106038357;CD4;SYK;LOC106030066;CD28
2	GO:0000076	BP	DNA replication checkpoint	2/ 120	2/ 12028	1	9.87e-05	0.105707	gene14690;gene8089	TIPIN;TICRR
2	GO:0031298	CC	replication fork protection complex	2/ 120	2/ 12028	1	9.87e-05	0.105707	gene14690;gene19763	TIPIN;GINS2
4	GO:0050851	BP	antigen receptor-mediated signaling pathway	4/ 120	27/ 12028	0.148148	0.000138467	0.137686	gene16004;gene17307;gene12495;gene7658	SYK;THEMIS2;PTPN22;TAB1
51	GO:0050794	BP	regulation of cellular process	51/ 120	3230/ 12028	0.0157895	0.000248498	0.223562	gene16220;gene10067;gene2313;gene3669;gene12495;gene15751;gene14021;gene7658;gene17183;gene1335;gene7610;gene17622;gene7614;gene8744;gene6479;gene7619;gene14384;gene3533;gene18300;gene1883;gene9941;gene2096;gene5173;gene3829;gene4828;gene11335;gene4700;gene16004;gene18295;gene1157;gene11139;gene19459;gene20461;gene14267;gene2315;gene17923;gene10080;gene9507;gene342;gene13916;gene13934;gene17307;g…	DKK2;LOC106038552;CD28;TRAF5;PTPN22;BCL6;DOCK8;TAB1;TFDP1;LOC106040700;RAC2;FMNL1;MFNG;TRAF2;KPNA2;SH3BP1;BCL2A1;ANHX;RASSF2;EDARADD;FAM49B;EAF2;E2F4;ARHGAP11A;CNOT6;STAT4;CDC23;SYK;ARHGAP25;STK4;PDZD3;IRF5;ADRBK1;LOC106043193;LOC106030066;TNFRSF9;XIAP;LOC106037928;RTKN2;LOC106042836;RBM5;THEMIS2;GRK4;TIPIN;LOC106038357;TAF4;PLA2G7;DGKZ;CTLA4;TICRR;CDC42SE2
4	GO:0002429	BP	immune response-activating cell surface receptor signaling pathway	4/ 120	32/ 12028	0.125	0.000273008	0.223562	gene16004;gene17307;gene12495;gene7658	SYK;THEMIS2;PTPN22;TAB1
4	GO:0002757	BP	immune response-activating signal transduction	4/ 120	32/ 12028	0.125	0.000273008	0.223562	gene16004;gene17307;gene12495;gene7658	SYK;THEMIS2;PTPN22;TAB1
4	GO:0002768	BP	immune response-regulating cell surface receptor signaling pathway	4/ 120	34/ 12028	0.117647	0.000346713	0.254031	gene16004;gene17307;gene12495;gene7658	SYK;THEMIS2;PTPN22;TAB1
4	GO:0002685	BP	regulation of leukocyte migration	4/ 120	34/ 12028	0.117647	0.000346713	0.254031	gene9870;gene7610;gene12495;gene9713	LOC106038357;RAC2;PTPN22;PLA2G7
4	GO:0002764	BP	immune response-regulating signaling pathway	4/ 120	35/ 12028	0.114286	0.000388453	0.270383	gene16004;gene17307;gene12495;gene7658	SYK;THEMIS2;PTPN22;TAB1
26	GO:0007165	BP	signal transduction	26/ 120	1279/ 12028	0.0203284	0.000453606	0.286116	gene10067;gene7658;gene15751;gene14267;gene3669;gene7610;gene8744;gene6479;gene7619;gene14021;gene3533;gene18300;gene3829;gene16004;gene18295;gene1157;gene19459;gene20461;gene12495;gene342;gene17307;gene556;gene11335;gene11139;gene1417;gene1883	LOC106038552;TAB1;BCL6;LOC106043193;TRAF5;RAC2;TRAF2;KPNA2;SH3BP1;DOCK8;ANHX;RASSF2;ARHGAP11A;SYK;ARHGAP25;STK4;IRF5;ADRBK1;PTPN22;RTKN2;THEMIS2;GRK4;STAT4;PDZD3;DGKZ;EDARADD
7	GO:0050776	BP	regulation of immune response	7/ 120	138/ 12028	0.0507246	0.000455028	0.286116	gene7610;gene12495;gene15751;gene17307;gene7658;gene9941;gene16004	RAC2;PTPN22;BCL6;THEMIS2;TAB1;FAM49B;SYK
52	GO:0050789	BP	regulation of biological process	52/ 120	3418/ 12028	0.0152136	0.000487867	0.286116	gene16565;gene16220;gene10067;gene2313;gene3669;gene12495;gene15751;gene14021;gene7658;gene17183;gene1335;gene7610;gene17622;gene7614;gene8744;gene6479;gene7619;gene14384;gene3533;gene18300;gene1883;gene9941;gene2096;gene5173;gene3829;gene4828;gene11335;gene4700;gene16004;gene18295;gene1157;gene11139;gene19459;gene20461;gene14267;gene2315;gene17923;gene10080;gene9507;gene342;gene13916;gene13934;g…	SMG8;DKK2;LOC106038552;CD28;TRAF5;PTPN22;BCL6;DOCK8;TAB1;TFDP1;LOC106040700;RAC2;FMNL1;MFNG;TRAF2;KPNA2;SH3BP1;BCL2A1;ANHX;RASSF2;EDARADD;FAM49B;EAF2;E2F4;ARHGAP11A;CNOT6;STAT4;CDC23;SYK;ARHGAP25;STK4;PDZD3;IRF5;ADRBK1;LOC106043193;LOC106030066;TNFRSF9;XIAP;LOC106037928;RTKN2;LOC106042836;RBM5;THEMIS2;GRK4;TIPIN;LOC106038357;TAF4;PLA2G7;DGKZ;CTLA4;TICRR;CDC42SE2
3	GO:0002690	BP	positive regulation of leukocyte chemotaxis	3/ 120	16/ 12028	0.1875	0.000493267	0.286116	gene9870;gene7610;gene9713	LOC106038357;RAC2;PLA2G7
4	GO:0051251	BP	positive regulation of lymphocyte activation	4/ 120	38/ 12028	0.105263	0.00053515	0.297993	gene9941;gene15751;gene2315;gene12495	FAM49B;BCL6;LOC106030066;PTPN22
2	GO:0071677	BP	positive regulation of mononuclear cell migration	2/ 120	4/ 12028	0.5	0.000584562	0.301396	gene9870;gene9713	LOC106038357;PLA2G7
2	GO:0090026	BP	positive regulation of monocyte chemotaxis	2/ 120	4/ 12028	0.5	0.000584562	0.301396	gene9870;gene9713	LOC106038357;PLA2G7
10	GO:0042127	BP	regulation of cell population proliferation	10/ 120	291/ 12028	0.0343643	0.000655156	0.32573	gene4828;gene7610;gene17923;gene12495;gene15751;gene14690;gene11335;gene2313;gene2314;gene5173	CNOT6;RAC2;TNFRSF9;PTPN22;BCL6;TIPIN;STAT4;CD28;CTLA4;E2F4
11	GO:0030234	MF	enzyme regulator activity	11/ 120	347/ 12028	0.0317003	0.000689676	0.331068	gene18285;gene7610;gene7619;gene10080;gene3533;gene5524;gene7658;gene16744;gene19516;gene11139;gene10548	NCAPH;RAC2;SH3BP1;XIAP;ANHX;ADAP1;TAB1;STRADA;LOC106048981;PDZD3;LOC106039127
3	GO:0002688	BP	regulation of leukocyte chemotaxis	3/ 120	19/ 12028	0.157895	0.00083509	0.38751	gene9870;gene7610;gene9713	LOC106038357;RAC2;PLA2G7
54	GO:0065007	BP	biological regulation	54/ 120	3665/ 12028	0.014734	0.000912317	0.40831	gene16565;gene16220;gene10067;gene2313;gene3669;gene12495;gene15751;gene14021;gene7658;gene17183;gene1335;gene7610;gene17622;gene7614;gene8744;gene6479;gene7619;gene14384;gene3533;gene18300;gene1883;gene9941;gene2096;gene5173;gene3829;gene4828;gene11335;gene4700;gene16004;gene18295;gene5161;gene1157;gene11139;gene19459;gene20461;gene14267;gene2315;gene6301;gene17923;gene10080;gene9507;gene342;gen…	SMG8;DKK2;LOC106038552;CD28;TRAF5;PTPN22;BCL6;DOCK8;TAB1;TFDP1;LOC106040700;RAC2;FMNL1;MFNG;TRAF2;KPNA2;SH3BP1;BCL2A1;ANHX;RASSF2;EDARADD;FAM49B;EAF2;E2F4;ARHGAP11A;CNOT6;STAT4;CDC23;SYK;ARHGAP25;LOC106033135;STK4;PDZD3;IRF5;ADRBK1;LOC106043193;LOC106030066;USP40;TNFRSF9;XIAP;LOC106037928;RTKN2;LOC106042836;RBM5;THEMIS2;GRK4;TIPIN;LOC106038357;TAF4;PLA2G7;DGKZ;CTLA4;TICRR;CDC42SE2
2	GO:0090025	BP	regulation of monocyte chemotaxis	2/ 120	5/ 12028	0.4	0.000967906	0.40831	gene9870;gene9713	LOC106038357;PLA2G7
2	GO:0033276	CC	transcription factor TFTC complex	2/ 120	5/ 12028	0.4	0.000967906	0.40831	gene12122;gene3968	TAF4;TAF5
3	GO:0002687	BP	positive regulation of leukocyte migration	3/ 120	21/ 12028	0.142857	0.00112965	0.449311	gene9870;gene7610;gene9713	LOC106038357;RAC2;PLA2G7
3	GO:0050921	BP	positive regulation of chemotaxis	3/ 120	21/ 12028	0.142857	0.00112965	0.449311	gene9870;gene7610;gene9713	LOC106038357;RAC2;PLA2G7
4	GO:0002696	BP	positive regulation of leukocyte activation	4/ 120	48/ 12028	0.0833333	0.00130656	0.491583	gene9941;gene15751;gene2315;gene12495	FAM49B;BCL6;LOC106030066;PTPN22
4	GO:0002521	BP	leukocyte differentiation	4/ 120	48/ 12028	0.0833333	0.00130656	0.491583	gene15751;gene4642;gene12495;gene7614	BCL6;OSTM1;PTPN22;MFNG
4	GO:0050867	BP	positive regulation of cell activation	4/ 120	49/ 12028	0.0816327	0.00141184	0.517218	gene9941;gene15751;gene2315;gene12495	FAM49B;BCL6;LOC106030066;PTPN22
6	GO:0004721	MF	phosphoprotein phosphatase activity	6/ 120	125/ 12028	0.048	0.00155439	0.554836	gene12504;gene12495;gene16540;gene13131;gene7658;gene18465	PPM1J;PTPN22;DUSP12;PTPRC;TAB1;PTPN6
4	GO:0002253	BP	activation of immune response	4/ 120	55/ 12028	0.0727273	0.0021707	0.755459	gene16004;gene17307;gene12495;gene7658	SYK;THEMIS2;PTPN22;TAB1
5	GO:0050778	BP	positive regulation of immune response	5/ 120	93/ 12028	0.0537634	0.00234884	0.788362	gene9941;gene16004;gene17307;gene12495;gene7658	FAM49B;SYK;THEMIS2;PTPN22;TAB1
3	GO:0002703	BP	regulation of leukocyte mediated immunity	3/ 120	27/ 12028	0.111111	0.00237851	0.788362	gene9941;gene7610;gene15751	FAM49B;RAC2;BCL6
4	GO:0002697	BP	regulation of immune effector process	4/ 120	59/ 12028	0.0677966	0.00280958	0.909585	gene9941;gene7610;gene15751;gene12495	FAM49B;RAC2;BCL6;PTPN22
3	GO:0002699	BP	positive regulation of immune effector process	3/ 120	30/ 12028	0.1	0.00323048	0.999366	gene9941;gene7610;gene12495	FAM49B;RAC2;PTPN22
3	GO:0004715	MF	non-membrane spanning protein tyrosine kinase activity	3/ 120	30/ 12028	0.1	0.00323048	0.999366	gene16004;gene10479;gene3005	SYK;LYN;TXK
3	GO:0050870	BP	positive regulation of T cell activation	3/ 120	31/ 12028	0.0967742	0.00355081	1	gene9941;gene2315;gene12495	FAM49B;LOC106030066;PTPN22
3	GO:1903039	BP	positive regulation of leukocyte cell-cell adhesion	3/ 120	31/ 12028	0.0967742	0.00355081	1	gene9941;gene2315;gene12495	FAM49B;LOC106030066;PTPN22
5	GO:0051276	BP	chromosome organization	5/ 120	108/ 12028	0.0462963	0.00447723	1	gene18427;gene19763;gene18285;gene9507;gene5161	NUF2;GINS2;NCAPH;LOC106037928;LOC106033135
3	GO:0050920	BP	regulation of chemotaxis	3/ 120	34/ 12028	0.0882353	0.0046256	1	gene9870;gene7610;gene9713	LOC106038357;RAC2;PLA2G7
11	GO:0048584	BP	positive regulation of response to stimulus	11/ 120	445/ 12028	0.0247191	0.00486635	1	gene7610;gene7614;gene16004;gene3669;gene12495;gene10080;gene17307;gene7658;gene9941;gene9870;gene9713	RAC2;MFNG;SYK;TRAF5;PTPN22;XIAP;THEMIS2;TAB1;FAM49B;LOC106038357;PLA2G7
3	GO:0019221	BP	cytokine-mediated signaling pathway	3/ 120	35/ 12028	0.0857143	0.00502283	1	gene8744;gene11335;gene19459	TRAF2;STAT4;IRF5
2	GO:0050853	BP	B cell receptor signaling pathway	2/ 120	11/ 12028	0.181818	0.00511878	1	gene16004;gene7658	SYK;TAB1
2	GO:0071675	BP	regulation of mononuclear cell migration	2/ 120	11/ 12028	0.181818	0.00511878	1	gene9870;gene9713	LOC106038357;PLA2G7
3	GO:0022409	BP	positive regulation of cell-cell adhesion	3/ 120	36/ 12028	0.0833333	0.00544003	1	gene9941;gene2315;gene12495	FAM49B;LOC106030066;PTPN22
3	GO:0030098	BP	lymphocyte differentiation	3/ 120	37/ 12028	0.0810811	0.00587746	1	gene15751;gene12495;gene7614	BCL6;PTPN22;MFNG
5	GO:0007264	BP	small GTPase mediated signal transduction	5/ 120	116/ 12028	0.0431034	0.00605021	1	gene10067;gene7610;gene15751;gene14021;gene14267	LOC106038552;RAC2;BCL6;DOCK8;LOC106043193
2	GO:0044774	BP	mitotic DNA integrity checkpoint	2/ 120	12/ 12028	0.166667	0.00610264	1	gene14690;gene8089	TIPIN;TICRR
2	GO:0002706	BP	regulation of lymphocyte mediated immunity	2/ 120	12/ 12028	0.166667	0.00610264	1	gene9941;gene15751	FAM49B;BCL6
5	GO:0030155	BP	regulation of cell adhesion	5/ 120	118/ 12028	0.0423729	0.00649732	1	gene9941;gene2315;gene7610;gene15751;gene12495	FAM49B;LOC106030066;RAC2;BCL6;PTPN22
4	GO:0051301	BP	cell division	4/ 120	78/ 12028	0.0512821	0.00762009	1	gene18427;gene14690;gene18285;gene4700	NUF2;TIPIN;NCAPH;CDC23
3	GO:1903037	BP	regulation of leukocyte cell-cell adhesion	3/ 120	41/ 12028	0.0731707	0.00783433	1	gene9941;gene2315;gene12495	FAM49B;LOC106030066;PTPN22
2	GO:0002822	BP	regulation of adaptive immune response based on somatic recombination of immune receptors built from immunoglobulin superfamily domains	2/ 120	15/ 12028	0.133333	0.00952105	1	gene9941;gene15751	FAM49B;BCL6
1	GO:1900165	BP	negative regulation of interleukin-6 secretion	1/ 120	1/ 12028	1	0.00997672	1	gene12495	PTPN22
1	GO:0042092	BP	type 2 immune response	1/ 120	1/ 12028	1	0.00997672	1	gene15751	BCL6
1	GO:0043380	BP	regulation of memory T cell differentiation	1/ 120	1/ 12028	1	0.00997672	1	gene15751	BCL6
1	GO:0070544	BP	histone H3-K36 demethylation	1/ 120	1/ 12028	1	0.00997672	1	gene1335	LOC106040700
1	GO:0034441	BP	plasma lipoprotein particle oxidation	1/ 120	1/ 12028	1	0.00997672	1	gene9713	PLA2G7
1	GO:1900044	BP	regulation of protein K63-linked ubiquitination	1/ 120	1/ 12028	1	0.00997672	1	gene12495	PTPN22
1	GO:2000568	BP	positive regulation of memory T cell activation	1/ 120	1/ 12028	1	0.00997672	1	gene9941	FAM49B
1	GO:2000567	BP	regulation of memory T cell activation	1/ 120	1/ 12028	1	0.00997672	1	gene9941	FAM49B
1	GO:1902523	BP	positive regulation of protein K63-linked ubiquitination	1/ 120	1/ 12028	1	0.00997672	1	gene12495	PTPN22
1	GO:0032764	BP	negative regulation of mast cell cytokine production	1/ 120	1/ 12028	1	0.00997672	1	gene15751	BCL6
1	GO:0035547	BP	regulation of interferon-beta secretion	1/ 120	1/ 12028	1	0.00997672	1	gene12495	PTPN22
1	GO:0035549	BP	positive regulation of interferon-beta secretion	1/ 120	1/ 12028	1	0.00997672	1	gene12495	PTPN22
1	GO:2000566	BP	positive regulation of CD8-positive, alpha-beta T cell proliferation	1/ 120	1/ 12028	1	0.00997672	1	gene12495	PTPN22
1	GO:2000564	BP	regulation of CD8-positive, alpha-beta T cell proliferation	1/ 120	1/ 12028	1	0.00997672	1	gene12495	PTPN22
1	GO:0046794	BP	transport of virus	1/ 120	1/ 12028	1	0.00997672	1	gene6479	KPNA2
1	GO:1902579	BP	multi-organism localization	1/ 120	1/ 12028	1	0.00997672	1	gene6479	KPNA2
1	GO:2000325	BP	regulation of nuclear receptor transcription coactivator activity	1/ 120	1/ 12028	1	0.00997672	1	gene4828	CNOT6
1	GO:2000327	BP	positive regulation of nuclear receptor transcription coactivator activity	1/ 120	1/ 12028	1	0.00997672	1	gene4828	CNOT6
1	GO:0048294	BP	negative regulation of isotype switching to IgE isotypes	1/ 120	1/ 12028	1	0.00997672	1	gene15751	BCL6
1	GO:0048293	BP	regulation of isotype switching to IgE isotypes	1/ 120	1/ 12028	1	0.00997672	1	gene15751	BCL6
1	GO:0075732	BP	viral penetration into host nucleus	1/ 120	1/ 12028	1	0.00997672	1	gene6479	KPNA2
1	GO:0075733	BP	intracellular transport of virus	1/ 120	1/ 12028	1	0.00997672	1	gene6479	KPNA2
1	GO:0044766	BP	multi-organism transport	1/ 120	1/ 12028	1	0.00997672	1	gene6479	KPNA2
1	GO:0035644	BP	phosphoanandamide dephosphorylation	1/ 120	1/ 12028	1	0.00997672	1	gene12495	PTPN22
1	GO:0033314	BP	mitotic DNA replication checkpoint	1/ 120	1/ 12028	1	0.00997672	1	gene8089	TICRR
1	GO:0071663	BP	positive regulation of granzyme B production	1/ 120	1/ 12028	1	0.00997672	1	gene12495	PTPN22
1	GO:0071661	BP	regulation of granzyme B production	1/ 120	1/ 12028	1	0.00997672	1	gene12495	PTPN22
1	GO:0032763	BP	regulation of mast cell cytokine production	1/ 120	1/ 12028	1	0.00997672	1	gene15751	BCL6
1	GO:0002890	BP	negative regulation of immunoglobulin mediated immune response	1/ 120	1/ 12028	1	0.00997672	1	gene15751	BCL6
1	GO:0070084	BP	protein initiator methionine removal	1/ 120	1/ 12028	1	0.00997672	1	gene19480	METAP1
1	GO:0048478	BP	replication fork protection	1/ 120	1/ 12028	1	0.00997672	1	gene14690	TIPIN
1	GO:0045829	BP	negative regulation of isotype switching	1/ 120	1/ 12028	1	0.00997672	1	gene15751	BCL6
1	GO:0075506	BP	entry of viral genome into host nucleus through nuclear pore complex via importin	1/ 120	1/ 12028	1	0.00997672	1	gene6479	KPNA2
1	GO:0043111	BP	replication fork arrest	1/ 120	1/ 12028	1	0.00997672	1	gene14690	TIPIN
1	GO:0002713	BP	negative regulation of B cell mediated immunity	1/ 120	1/ 12028	1	0.00997672	1	gene15751	BCL6
2	GO:0051250	BP	negative regulation of lymphocyte activation	2/ 120	16/ 12028	0.125	0.0108107	1	gene15751;gene12495	BCL6;PTPN22
3	GO:0006402	BP	mRNA catabolic process	3/ 120	47/ 12028	0.0638298	0.0114135	1	gene16565;gene9507;gene4828	SMG8;LOC106037928;CNOT6
5	GO:1903047	BP	mitotic cell cycle process	5/ 120	137/ 12028	0.0364963	0.0119573	1	gene18427;gene14690;gene18285;gene8089;gene5173	NUF2;TIPIN;NCAPH;TICRR;E2F4
2	GO:0048285	BP	organelle fission	2/ 120	17/ 12028	0.117647	0.0121729	1	gene9507;gene4552	LOC106037928;MTFR2
3	GO:0016311	BP	dephosphorylation	3/ 120	49/ 12028	0.0612245	0.0127836	1	gene14041;gene12495;gene14042	LOC106043005;PTPN22;INPPL1
5	GO:0008284	BP	positive regulation of cell population proliferation	5/ 120	141/ 12028	0.035461	0.0134121	1	gene14690;gene4828;gene7610;gene15751;gene12495	TIPIN;CNOT6;RAC2;BCL6;PTPN22
8	GO:0042981	BP	regulation of apoptotic process	8/ 120	315/ 12028	0.0253968	0.0135212	1	gene8744;gene10080;gene14384;gene13934;gene15751;gene9507;gene18300;gene3669	TRAF2;XIAP;BCL2A1;RBM5;BCL6;LOC106037928;RASSF2;TRAF5
2	GO:0050852	BP	T cell receptor signaling pathway	2/ 120	18/ 12028	0.111111	0.0136059	1	gene17307;gene12495	THEMIS2;PTPN22
2	GO:0070665	BP	positive regulation of leukocyte proliferation	2/ 120	18/ 12028	0.111111	0.0136059	1	gene15751;gene12495	BCL6;PTPN22
2	GO:0050671	BP	positive regulation of lymphocyte proliferation	2/ 120	18/ 12028	0.111111	0.0136059	1	gene15751;gene12495	BCL6;PTPN22
2	GO:0046856	BP	phosphatidylinositol dephosphorylation	2/ 120	18/ 12028	0.111111	0.0136059	1	gene14041;gene14042	LOC106043005;INPPL1
2	GO:0032946	BP	positive regulation of mononuclear cell proliferation	2/ 120	18/ 12028	0.111111	0.0136059	1	gene15751;gene12495	BCL6;PTPN22
8	GO:0043067	BP	regulation of programmed cell death	8/ 120	320/ 12028	0.025	0.0147445	1	gene8744;gene10080;gene14384;gene13934;gene15751;gene9507;gene18300;gene3669	TRAF2;XIAP;BCL2A1;RBM5;BCL6;LOC106037928;RASSF2;TRAF5
2	GO:0030183	BP	B cell differentiation	2/ 120	19/ 12028	0.105263	0.0151084	1	gene15751;gene7614	BCL6;MFNG
2	GO:0002695	BP	negative regulation of leukocyte activation	2/ 120	19/ 12028	0.105263	0.0151084	1	gene15751;gene12495	BCL6;PTPN22
2	GO:0050866	BP	negative regulation of cell activation	2/ 120	20/ 12028	0.1	0.0166787	1	gene15751;gene12495	BCL6;PTPN22
2	GO:0002819	BP	regulation of adaptive immune response	2/ 120	20/ 12028	0.1	0.0166787	1	gene9941;gene15751	FAM49B;BCL6
3	GO:0006401	BP	RNA catabolic process	3/ 120	55/ 12028	0.0545455	0.0174373	1	gene16565;gene9507;gene4828	SMG8;LOC106037928;CNOT6
1	GO:1902914	BP	regulation of protein polyubiquitination	1/ 120	2/ 12028	0.5	0.0198547	1	gene12495	PTPN22
1	GO:1902916	BP	positive regulation of protein polyubiquitination	1/ 120	2/ 12028	0.5	0.0198547	1	gene12495	PTPN22
1	GO:0046469	BP	platelet activating factor metabolic process	1/ 120	2/ 12028	0.5	0.0198547	1	gene9713	PLA2G7
1	GO:0000185	BP	activation of MAPKKK activity	1/ 120	2/ 12028	0.5	0.0198547	1	gene7658	TAB1
1	GO:0002315	BP	marginal zone B cell differentiation	1/ 120	2/ 12028	0.5	0.0198547	1	gene7614	MFNG
1	GO:0034157	BP	positive regulation of toll-like receptor 7 signaling pathway	1/ 120	2/ 12028	0.5	0.0198547	1	gene12495	PTPN22
1	GO:0034155	BP	regulation of toll-like receptor 7 signaling pathway	1/ 120	2/ 12028	0.5	0.0198547	1	gene12495	PTPN22
1	GO:0099527	BP	postsynapse to nucleus signaling pathway	1/ 120	2/ 12028	0.5	0.0198547	1	gene6479	KPNA2
1	GO:0071593	BP	lymphocyte aggregation	1/ 120	2/ 12028	0.5	0.0198547	1	gene7610	RAC2
1	GO:0002823	BP	negative regulation of adaptive immune response based on somatic recombination of immune receptors built from immunoglobulin superfamily domains	1/ 120	2/ 12028	0.5	0.0198547	1	gene15751	BCL6
1	GO:0002820	BP	negative regulation of adaptive immune response	1/ 120	2/ 12028	0.5	0.0198547	1	gene15751	BCL6
1	GO:0070486	BP	leukocyte aggregation	1/ 120	2/ 12028	0.5	0.0198547	1	gene7610	RAC2
1	GO:0002467	BP	germinal center formation	1/ 120	2/ 12028	0.5	0.0198547	1	gene15751	BCL6
1	GO:0046641	BP	positive regulation of alpha-beta T cell proliferation	1/ 120	2/ 12028	0.5	0.0198547	1	gene12495	PTPN22
1	GO:0002707	BP	negative regulation of lymphocyte mediated immunity	1/ 120	2/ 12028	0.5	0.0198547	1	gene15751	BCL6
1	GO:0034165	BP	positive regulation of toll-like receptor 9 signaling pathway	1/ 120	2/ 12028	0.5	0.0198547	1	gene12495	PTPN22
1	GO:2001187	BP	positive regulation of CD8-positive, alpha-beta T cell activation	1/ 120	2/ 12028	0.5	0.0198547	1	gene12495	PTPN22
1	GO:2001185	BP	regulation of CD8-positive, alpha-beta T cell activation	1/ 120	2/ 12028	0.5	0.0198547	1	gene12495	PTPN22
1	GO:0001916	BP	positive regulation of T cell mediated cytotoxicity	1/ 120	2/ 12028	0.5	0.0198547	1	gene9941	FAM49B
1	GO:0034720	BP	histone H3-K4 demethylation	1/ 120	2/ 12028	0.5	0.0198547	1	gene1335	LOC106040700
1	GO:0043366	BP	beta selection	1/ 120	2/ 12028	0.5	0.0198547	1	gene16004	SYK
1	GO:0000083	BP	regulation of transcription involved in G1/S transition of mitotic cell cycle	1/ 120	2/ 12028	0.5	0.0198547	1	gene5173	E2F4
1	GO:0070966	BP	nuclear-transcribed mRNA catabolic process, no-go decay	1/ 120	2/ 12028	0.5	0.0198547	1	gene4828	CNOT6
1	GO:0060753	BP	regulation of mast cell chemotaxis	1/ 120	2/ 12028	0.5	0.0198547	1	gene7610	RAC2
3	GO:0022407	BP	regulation of cell-cell adhesion	3/ 120	58/ 12028	0.0517241	0.0200735	1	gene9941;gene2315;gene12495	FAM49B;LOC106030066;PTPN22
8	GO:0010941	BP	regulation of cell death	8/ 120	339/ 12028	0.0235988	0.0201352	1	gene8744;gene10080;gene14384;gene13934;gene15751;gene9507;gene18300;gene3669	TRAF2;XIAP;BCL2A1;RBM5;BCL6;LOC106037928;RASSF2;TRAF5
6	GO:0022402	BP	cell cycle process	6/ 120	216/ 12028	0.0277778	0.0210629	1	gene18285;gene18427;gene9507;gene14690;gene8089;gene5173	NCAPH;NUF2;LOC106037928;TIPIN;TICRR;E2F4
4	GO:0051272	BP	positive regulation of cellular component movement	4/ 120	106/ 12028	0.0377358	0.0214784	1	gene9870;gene7610;gene15751;gene9713	LOC106038357;RAC2;BCL6;PLA2G7
2	GO:0007266	BP	Rho protein signal transduction	2/ 120	23/ 12028	0.0869565	0.0217824	1	gene7610;gene15751	RAC2;BCL6
2	GO:0002700	BP	regulation of production of molecular mediator of immune response	2/ 120	23/ 12028	0.0869565	0.0217824	1	gene15751;gene12495	BCL6;PTPN22
2	GO:0046839	BP	phospholipid dephosphorylation	2/ 120	23/ 12028	0.0869565	0.0217824	1	gene14041;gene14042	LOC106043005;INPPL1
3	GO:0006913	BP	nucleocytoplasmic transport	3/ 120	60/ 12028	0.05	0.0219463	1	gene16744;gene6479;gene17963	STRADA;KPNA2;GLE1
3	GO:0051169	BP	nuclear transport	3/ 120	61/ 12028	0.0491803	0.0229173	1	gene16744;gene6479;gene17963	STRADA;KPNA2;GLE1
2	GO:0006367	BP	transcription initiation from RNA polymerase II promoter	2/ 120	24/ 12028	0.0833333	0.0236097	1	gene12122;gene3968	TAF4;TAF5
3	GO:0045785	BP	positive regulation of cell adhesion	3/ 120	63/ 12028	0.047619	0.0249287	1	gene9941;gene2315;gene12495	FAM49B;LOC106030066;PTPN22
2	GO:0031398	BP	positive regulation of protein ubiquitination	2/ 120	25/ 12028	0.08	0.0254977	1	gene12495;gene10080	PTPN22;XIAP
3	GO:0046649	BP	lymphocyte activation	3/ 120	64/ 12028	0.046875	0.025969	1	gene15751;gene12495;gene7614	BCL6;PTPN22;MFNG
5	GO:0032101	BP	regulation of response to external stimulus	5/ 120	168/ 12028	0.0297619	0.0264169	1	gene9870;gene9713;gene15751;gene12495;gene7610	LOC106038357;PLA2G7;BCL6;PTPN22;RAC2
5	GO:0006955	BP	immune response	5/ 120	170/ 12028	0.0294118	0.0276163	1	gene9870;gene18476;gene15751;gene2313;gene2314	LOC106038357;CD4;BCL6;CD28;CTLA4
3	GO:0007265	BP	Ras protein signal transduction	3/ 120	66/ 12028	0.0454545	0.0281188	1	gene10067;gene7610;gene15751	LOC106038552;RAC2;BCL6
1	GO:0060263	BP	regulation of respiratory burst	1/ 120	3/ 12028	0.333333	0.029635	1	gene7610	RAC2
1	GO:0016601	BP	Rac protein signal transduction	1/ 120	3/ 12028	0.333333	0.029635	1	gene7610	RAC2
1	GO:0035280	BP	miRNA loading onto RISC involved in gene silencing by miRNA	1/ 120	3/ 12028	0.333333	0.029635	1	gene9507	LOC106037928
1	GO:1902624	BP	positive regulation of neutrophil migration	1/ 120	3/ 12028	0.333333	0.029635	1	gene7610	RAC2
1	GO:0010501	BP	RNA secondary structure unwinding	1/ 120	3/ 12028	0.333333	0.029635	1	gene9507	LOC106037928
1	GO:0008015	BP	blood circulation	1/ 120	3/ 12028	0.333333	0.029635	1	gene5173	E2F4
1	GO:2000483	BP	negative regulation of interleukin-8 secretion	1/ 120	3/ 12028	0.333333	0.029635	1	gene12495	PTPN22
1	GO:0070425	BP	negative regulation of nucleotide-binding oligomerization domain containing signaling pathway	1/ 120	3/ 12028	0.333333	0.029635	1	gene12495	PTPN22
1	GO:0070424	BP	regulation of nucleotide-binding oligomerization domain containing signaling pathway	1/ 120	3/ 12028	0.333333	0.029635	1	gene12495	PTPN22
1	GO:0002829	BP	negative regulation of type 2 immune response	1/ 120	3/ 12028	0.333333	0.029635	1	gene15751	BCL6
1	GO:0031295	BP	T cell costimulation	1/ 120	3/ 12028	0.333333	0.029635	1	gene2315	LOC106030066
1	GO:0031294	BP	lymphocyte costimulation	1/ 120	3/ 12028	0.333333	0.029635	1	gene2315	LOC106030066
1	GO:0071225	BP	cellular response to muramyl dipeptide	1/ 120	3/ 12028	0.333333	0.029635	1	gene12495	PTPN22
1	GO:1902741	BP	positive regulation of interferon-alpha secretion	1/ 120	3/ 12028	0.333333	0.029635	1	gene12495	PTPN22
1	GO:0035904	BP	aorta development	1/ 120	3/ 12028	0.333333	0.029635	1	gene7658	TAB1
1	GO:0097341	BP	zymogen inhibition	1/ 120	3/ 12028	0.333333	0.029635	1	gene10080	XIAP
1	GO:0097340	BP	inhibition of cysteine-type endopeptidase activity	1/ 120	3/ 12028	0.333333	0.029635	1	gene10080	XIAP
1	GO:0046640	BP	regulation of alpha-beta T cell proliferation	1/ 120	3/ 12028	0.333333	0.029635	1	gene12495	PTPN22
1	GO:0002704	BP	negative regulation of leukocyte mediated immunity	1/ 120	3/ 12028	0.333333	0.029635	1	gene15751	BCL6
1	GO:0034163	BP	regulation of toll-like receptor 9 signaling pathway	1/ 120	3/ 12028	0.333333	0.029635	1	gene12495	PTPN22
1	GO:0001914	BP	regulation of T cell mediated cytotoxicity	1/ 120	3/ 12028	0.333333	0.029635	1	gene9941	FAM49B
1	GO:0034145	BP	positive regulation of toll-like receptor 4 signaling pathway	1/ 120	3/ 12028	0.333333	0.029635	1	gene12495	PTPN22
1	GO:0034141	BP	positive regulation of toll-like receptor 3 signaling pathway	1/ 120	3/ 12028	0.333333	0.029635	1	gene12495	PTPN22
1	GO:0071624	BP	positive regulation of granulocyte chemotaxis	1/ 120	3/ 12028	0.333333	0.029635	1	gene7610	RAC2
1	GO:1903753	BP	negative regulation of p38MAPK cascade	1/ 120	3/ 12028	0.333333	0.029635	1	gene12495	PTPN22
1	GO:0090023	BP	positive regulation of neutrophil chemotaxis	1/ 120	3/ 12028	0.333333	0.029635	1	gene7610	RAC2
1	GO:1990001	BP	inhibition of cysteine-type endopeptidase activity involved in apoptotic process	1/ 120	3/ 12028	0.333333	0.029635	1	gene10080	XIAP
1	GO:0050691	BP	regulation of defense response to virus by host	1/ 120	3/ 12028	0.333333	0.029635	1	gene12495	PTPN22
1	GO:0060840	BP	artery development	1/ 120	3/ 12028	0.333333	0.029635	1	gene7658	TAB1
1	GO:0007168	BP	receptor guanylyl cyclase signaling pathway	1/ 120	3/ 12028	0.333333	0.029635	1	gene11139	PDZD3
1	GO:0070432	BP	regulation of nucleotide-binding oligomerization domain containing 2 signaling pathway	1/ 120	3/ 12028	0.333333	0.029635	1	gene12495	PTPN22
1	GO:0070433	BP	negative regulation of nucleotide-binding oligomerization domain containing 2 signaling pathway	1/ 120	3/ 12028	0.333333	0.029635	1	gene12495	PTPN22
1	GO:0034374	BP	low-density lipoprotein particle remodeling	1/ 120	3/ 12028	0.333333	0.029635	1	gene9713	PLA2G7
1	GO:0010603	BP	regulation of cytoplasmic mRNA processing body assembly	1/ 120	3/ 12028	0.333333	0.029635	1	gene4828	CNOT6
1	GO:0010606	BP	positive regulation of cytoplasmic mRNA processing body assembly	1/ 120	3/ 12028	0.333333	0.029635	1	gene4828	CNOT6
1	GO:0002638	BP	negative regulation of immunoglobulin production	1/ 120	3/ 12028	0.333333	0.029635	1	gene15751	BCL6
1	GO:0006607	BP	NLS-bearing protein import into nucleus	1/ 120	3/ 12028	0.333333	0.029635	1	gene6479	KPNA2
1	GO:1902739	BP	regulation of interferon-alpha secretion	1/ 120	3/ 12028	0.333333	0.029635	1	gene12495	PTPN22
1	GO:0002230	BP	positive regulation of defense response to virus by host	1/ 120	3/ 12028	0.333333	0.029635	1	gene12495	PTPN22
1	GO:0006419	BP	alanyl-tRNA aminoacylation	1/ 120	3/ 12028	0.333333	0.029635	1	gene2015	AARS2
1	GO:0045191	BP	regulation of isotype switching	1/ 120	3/ 12028	0.333333	0.029635	1	gene15751	BCL6
3	GO:0030258	BP	lipid modification	3/ 120	68/ 12028	0.0441176	0.0303606	1	gene9713;gene14041;gene14042	PLA2G7;LOC106043005;INPPL1
2	GO:0031570	BP	DNA integrity checkpoint	2/ 120	28/ 12028	0.0714286	0.0315123	1	gene14690;gene8089	TIPIN;TICRR
2	GO:0071103	BP	DNA conformation change	2/ 120	29/ 12028	0.0689655	0.0336296	1	gene19763;gene18285	GINS2;NCAPH
2	GO:0007093	BP	mitotic cell cycle checkpoint	2/ 120	29/ 12028	0.0689655	0.0336296	1	gene14690;gene8089	TIPIN;TICRR
3	GO:0032103	BP	positive regulation of response to external stimulus	3/ 120	72/ 12028	0.0416667	0.0351184	1	gene9870;gene7610;gene9713	LOC106038357;RAC2;PLA2G7
2	GO:1903322	BP	positive regulation of protein modification by small protein conjugation or removal	2/ 120	30/ 12028	0.0666667	0.035801	1	gene12495;gene10080	PTPN22;XIAP
2	GO:0008360	BP	regulation of cell shape	2/ 120	31/ 12028	0.0645161	0.0380252	1	gene16015;gene17622	CDC42SE2;FMNL1
1	GO:2000104	BP	negative regulation of DNA-dependent DNA replication	1/ 120	4/ 12028	0.25	0.0393185	1	gene14690	TIPIN
1	GO:1902622	BP	regulation of neutrophil migration	1/ 120	4/ 12028	0.25	0.0393185	1	gene7610	RAC2
1	GO:0034139	BP	regulation of toll-like receptor 3 signaling pathway	1/ 120	4/ 12028	0.25	0.0393185	1	gene12495	PTPN22
1	GO:0000266	BP	mitochondrial fission	1/ 120	4/ 12028	0.25	0.0393185	1	gene4552	MTFR2
1	GO:0002889	BP	regulation of immunoglobulin mediated immune response	1/ 120	4/ 12028	0.25	0.0393185	1	gene15751	BCL6
1	GO:0051315	BP	attachment of mitotic spindle microtubules to kinetochore	1/ 120	4/ 12028	0.25	0.0393185	1	gene18427	NUF2
1	GO:0040033	BP	negative regulation of translation, ncRNA-mediated	1/ 120	4/ 12028	0.25	0.0393185	1	gene9507	LOC106037928
1	GO:0002828	BP	regulation of type 2 immune response	1/ 120	4/ 12028	0.25	0.0393185	1	gene15751	BCL6
1	GO:0031054	BP	pre-miRNA processing	1/ 120	4/ 12028	0.25	0.0393185	1	gene9507	LOC106037928
1	GO:0070076	BP	histone lysine demethylation	1/ 120	4/ 12028	0.25	0.0393185	1	gene1335	LOC106040700
1	GO:0045974	BP	regulation of translation, ncRNA-mediated	1/ 120	4/ 12028	0.25	0.0393185	1	gene9507	LOC106037928
1	GO:0016233	BP	telomere capping	1/ 120	4/ 12028	0.25	0.0393185	1	gene5161	LOC106033135
1	GO:0031573	BP	intra-S DNA damage checkpoint	1/ 120	4/ 12028	0.25	0.0393185	1	gene14690	TIPIN
1	GO:0035278	BP	miRNA mediated inhibition of translation	1/ 120	4/ 12028	0.25	0.0393185	1	gene9507	LOC106037928
1	GO:0048821	BP	erythrocyte development	1/ 120	4/ 12028	0.25	0.0393185	1	gene15751	BCL6
1	GO:0090022	BP	regulation of neutrophil chemotaxis	1/ 120	4/ 12028	0.25	0.0393185	1	gene7610	RAC2
1	GO:0036066	BP	protein O-linked fucosylation	1/ 120	4/ 12028	0.25	0.0393185	1	gene7614	MFNG
1	GO:0070922	BP	small RNA loading onto RISC	1/ 120	4/ 12028	0.25	0.0393185	1	gene9507	LOC106037928
1	GO:0030890	BP	positive regulation of B cell proliferation	1/ 120	4/ 12028	0.25	0.0393185	1	gene15751	BCL6
1	GO:0002712	BP	regulation of B cell mediated immunity	1/ 120	4/ 12028	0.25	0.0393185	1	gene15751	BCL6
1	GO:0002719	BP	negative regulation of cytokine production involved in immune response	1/ 120	4/ 12028	0.25	0.0393185	1	gene15751	BCL6
2	GO:1903046	BP	meiotic cell cycle process	2/ 120	34/ 12028	0.0588235	0.0450019	1	gene18427;gene9507	NUF2;LOC106037928
2	GO:0051168	BP	nuclear export	2/ 120	34/ 12028	0.0588235	0.0450019	1	gene16744;gene17963	STRADA;GLE1
2	GO:0042113	BP	B cell activation	2/ 120	34/ 12028	0.0588235	0.0450019	1	gene15751;gene7614	BCL6;MFNG
3	GO:0034655	BP	nucleobase-containing compound catabolic process	3/ 120	80/ 12028	0.0375	0.045715	1	gene16565;gene9507;gene4828	SMG8;LOC106037928;CNOT6
1	GO:0000289	BP	nuclear-transcribed mRNA poly(A) tail shortening	1/ 120	5/ 12028	0.2	0.0489061	1	gene4828	CNOT6
1	GO:0032717	BP	negative regulation of interleukin-8 production	1/ 120	5/ 12028	0.2	0.0489061	1	gene12495	PTPN22
1	GO:0008214	BP	protein dealkylation	1/ 120	5/ 12028	0.2	0.0489061	1	gene1335	LOC106040700
1	GO:0010586	BP	miRNA metabolic process	1/ 120	5/ 12028	0.2	0.0489061	1	gene9507	LOC106037928
1	GO:0007159	BP	leukocyte cell-cell adhesion	1/ 120	5/ 12028	0.2	0.0489061	1	gene7610	RAC2
1	GO:0044818	BP	mitotic G2/M transition checkpoint	1/ 120	5/ 12028	0.2	0.0489061	1	gene8089	TICRR
1	GO:0007130	BP	synaptonemal complex assembly	1/ 120	5/ 12028	0.2	0.0489061	1	gene9507	LOC106037928
1	GO:0016577	BP	histone demethylation	1/ 120	5/ 12028	0.2	0.0489061	1	gene1335	LOC106040700
1	GO:2000482	BP	regulation of interleukin-8 secretion	1/ 120	5/ 12028	0.2	0.0489061	1	gene12495	PTPN22
1	GO:0010955	BP	negative regulation of protein processing	1/ 120	5/ 12028	0.2	0.0489061	1	gene10080	XIAP
1	GO:0000727	BP	double-strand break repair via break-induced replication	1/ 120	5/ 12028	0.2	0.0489061	1	gene19763	GINS2
1	GO:1903318	BP	negative regulation of protein maturation	1/ 120	5/ 12028	0.2	0.0489061	1	gene10080	XIAP
1	GO:0034143	BP	regulation of toll-like receptor 4 signaling pathway	1/ 120	5/ 12028	0.2	0.0489061	1	gene12495	PTPN22
1	GO:0006482	BP	protein demethylation	1/ 120	5/ 12028	0.2	0.0489061	1	gene1335	LOC106040700
1	GO:0030316	BP	osteoclast differentiation	1/ 120	5/ 12028	0.2	0.0489061	1	gene4642	OSTM1
1	GO:0036065	BP	fucosylation	1/ 120	5/ 12028	0.2	0.0489061	1	gene7614	MFNG
1	GO:0007140	BP	male meiotic nuclear division	1/ 120	5/ 12028	0.2	0.0489061	1	gene9507	LOC106037928
5	GO:0051270	BP	regulation of cellular component movement	5/ 120	200/ 12028	0.025	0.0498307	1	gene9870;gene9713;gene15751;gene12495;gene7610	LOC106038357;PLA2G7;BCL6;PTPN22;RAC2
5	GO:0000785	CC	chromatin	5/ 120	105/ 12028	0.047619	0.0039709	1	gene13916;gene14690;gene12122;gene3968;gene5173	LOC106042836;TIPIN;TAF4;TAF5;E2F4
4	GO:0000790	CC	nuclear chromatin	4/ 120	72/ 12028	0.0555556	0.00575214	1	gene14690;gene12122;gene3968;gene5173	TIPIN;TAF4;TAF5;E2F4
2	GO:0009898	CC	cytoplasmic side of plasma membrane	2/ 120	13/ 12028	0.153846	0.00716539	1	gene12495;gene3669	PTPN22;TRAF5
2	GO:0070461	CC	SAGA-type complex	2/ 120	14/ 12028	0.142857	0.0083054	1	gene12122;gene3968	TAF4;TAF5
1	GO:0098890	CC	extrinsic component of postsynaptic membrane	1/ 120	1/ 12028	1	0.00997672	1	gene6479	KPNA2
1	GO:0098892	CC	extrinsic component of postsynaptic specialization membrane	1/ 120	1/ 12028	1	0.00997672	1	gene6479	KPNA2
1	GO:0000799	CC	nuclear condensin complex	1/ 120	1/ 12028	1	0.00997672	1	gene18285	NCAPH
1	GO:0043657	CC	host cell	1/ 120	1/ 12028	1	0.00997672	1	gene6479	KPNA2
1	GO:0099243	CC	extrinsic component of synaptic membrane	1/ 120	1/ 12028	1	0.00997672	1	gene6479	KPNA2
1	GO:0034362	CC	low-density lipoprotein particle	1/ 120	1/ 12028	1	0.00997672	1	gene9713	PLA2G7
2	GO:0005669	CC	transcription factor TFIID complex	2/ 120	16/ 12028	0.125	0.0108107	1	gene12122;gene3968	TAF4;TAF5
3	GO:0098552	CC	side of membrane	3/ 120	48/ 12028	0.0625	0.0120873	1	gene17923;gene12495;gene3669	TNFRSF9;PTPN22;TRAF5
2	GO:0098562	CC	cytoplasmic side of membrane	2/ 120	18/ 12028	0.111111	0.0136059	1	gene12495;gene3669	PTPN22;TRAF5
8	GO:0099080	CC	supramolecular complex	8/ 120	319/ 12028	0.0250784	0.0144936	1	gene7610;gene17622;gene9846;gene18427;gene15645;gene9507;gene7403;gene11741	RAC2;FMNL1;KIF15;NUF2;SLC1A4;LOC106037928;KIF2A;LMNB1
1	GO:0032783	CC	super elongation complex	1/ 120	2/ 12028	0.5	0.0198547	1	gene2096	EAF2
1	GO:0031528	CC	microvillus membrane	1/ 120	2/ 12028	0.5	0.0198547	1	gene18970	MYO1F
1	GO:0000811	CC	GINS complex	1/ 120	2/ 12028	0.5	0.0198547	1	gene19763	GINS2
1	GO:0031261	CC	DNA replication preinitiation complex	1/ 120	2/ 12028	0.5	0.0198547	1	gene19763	GINS2
1	GO:0070187	CC	shelterin complex	1/ 120	2/ 12028	0.5	0.0198547	1	gene5161	LOC106033135
1	GO:0042101	CC	T cell receptor complex	1/ 120	2/ 12028	0.5	0.0198547	1	gene16004	SYK
1	GO:0019815	CC	B cell receptor complex	1/ 120	2/ 12028	0.5	0.0198547	1	gene16004	SYK
5	GO:0005667	CC	transcription regulator complex	5/ 120	157/ 12028	0.0318471	0.0204192	1	gene1671;gene12122;gene3968;gene17183;gene5173	E2F7;TAF4;TAF5;TFDP1;E2F4
2	GO:0005884	CC	actin filament	2/ 120	23/ 12028	0.0869565	0.0217824	1	gene7610;gene17622	RAC2;FMNL1
6	GO:0099513	CC	polymeric cytoskeletal fiber	6/ 120	222/ 12028	0.027027	0.0237188	1	gene7610;gene17622;gene9846;gene15645;gene7403;gene11741	RAC2;FMNL1;KIF15;SLC1A4;KIF2A;LMNB1
13	GO:0005829	CC	cytosol	13/ 120	681/ 12028	0.0190896	0.0254577	1	gene18285;gene4642;gene8744;gene6479;gene6301;gene11335;gene9507;gene7610;gene3669;gene7658;gene16744;gene3858;gene12122	NCAPH;OSTM1;TRAF2;KPNA2;USP40;STAT4;LOC106037928;RAC2;TRAF5;TAB1;STRADA;G2E3;TAF4
1	GO:0000778	CC	condensed nuclear chromosome kinetochore	1/ 120	3/ 12028	0.333333	0.029635	1	gene18427	NUF2
1	GO:0035631	CC	CD40 receptor complex	1/ 120	3/ 12028	0.333333	0.029635	1	gene3669	TRAF5
1	GO:0070578	CC	RISC-loading complex	1/ 120	3/ 12028	0.333333	0.029635	1	gene9507	LOC106037928
1	GO:0031262	CC	Ndc80 complex	1/ 120	3/ 12028	0.333333	0.029635	1	gene18427	NUF2
1	GO:0019814	CC	immunoglobulin complex	1/ 120	3/ 12028	0.333333	0.029635	1	gene16004	SYK
22	GO:0005634	CC	nucleus	22/ 120	1434/ 12028	0.0153417	0.0338756	1	gene18427;gene12495;gene15751;gene7658;gene17183;gene1335;gene18285;gene6479;gene3533;gene19763;gene5173;gene10737;gene19625;gene16004;gene4828;gene10080;gene13916;gene17307;gene14690;gene11335;gene1671;gene8089	NUF2;PTPN22;BCL6;TAB1;TFDP1;LOC106040700;NCAPH;KPNA2;ANHX;GINS2;E2F4;MCM6;MIER2;SYK;CNOT6;XIAP;LOC106042836;THEMIS2;TIPIN;STAT4;E2F7;TICRR
6	GO:0099512	CC	supramolecular fiber	6/ 120	242/ 12028	0.0247934	0.0341717	1	gene7610;gene17622;gene9846;gene15645;gene7403;gene11741	RAC2;FMNL1;KIF15;SLC1A4;KIF2A;LMNB1
6	GO:0099081	CC	supramolecular polymer	6/ 120	242/ 12028	0.0247934	0.0341717	1	gene7610;gene17622;gene9846;gene15645;gene7403;gene11741	RAC2;FMNL1;KIF15;SLC1A4;KIF2A;LMNB1
1	GO:0018995	CC	host cellular component	1/ 120	4/ 12028	0.25	0.0393185	1	gene6479	KPNA2
1	GO:0000796	CC	condensin complex	1/ 120	4/ 12028	0.25	0.0393185	1	gene18285	NCAPH
1	GO:0000783	CC	nuclear telomere cap complex	1/ 120	4/ 12028	0.25	0.0393185	1	gene5161	LOC106033135
1	GO:0000782	CC	telomere cap complex	1/ 120	4/ 12028	0.25	0.0393185	1	gene5161	LOC106033135
1	GO:0032009	CC	early phagosome	1/ 120	4/ 12028	0.25	0.0393185	1	gene16004	SYK
16	GO:0005737	CC	cytoplasm	16/ 120	960/ 12028	0.0166667	0.0400778	1	gene4828;gene7610;gene2015;gene18427;gene6479;gene19480;gene3669;gene10080;gene12495;gene17307;gene16015;gene17900;gene14690;gene11335;gene16004;gene7619	CNOT6;RAC2;AARS2;NUF2;KPNA2;METAP1;TRAF5;XIAP;PTPN22;THEMIS2;CDC42SE2;KCNAB2;TIPIN;STAT4;SYK;SH3BP1
1	GO:0031332	CC	RNAi effector complex	1/ 120	5/ 12028	0.2	0.0489061	1	gene9507	LOC106037928
1	GO:0005622	CC	intracellular	1/ 120	5/ 12028	0.2	0.0489061	1	gene10067	LOC106038552
1	GO:0016442	CC	RISC complex	1/ 120	5/ 12028	0.2	0.0489061	1	gene9507	LOC106037928
2	GO:0004703	MF	G protein-coupled receptor kinase activity	2/ 120	10/ 12028	0.2	0.0042155	1	gene20461;gene556	ADRBK1;GRK4
6	GO:0008047	MF	enzyme activator activity	6/ 120	165/ 12028	0.0363636	0.00614607	1	gene18285;gene5524;gene7619;gene3533;gene7658;gene16744	NCAPH;ADAP1;SH3BP1;ANHX;TAB1;STRADA
6	GO:0016791	MF	phosphatase activity	6/ 120	175/ 12028	0.0342857	0.00811931	1	gene12504;gene12495;gene16540;gene13131;gene7658;gene18465	PPM1J;PTPN22;DUSP12;PTPRC;TAB1;PTPN6
2	GO:0005164	MF	tumor necrosis factor receptor binding	2/ 120	15/ 12028	0.133333	0.00952105	1	gene8744;gene3669	TRAF2;TRAF5
1	GO:0072586	MF	DNA topoisomerase type II (double strand cut, ATP-hydrolyzing) regulator activity	1/ 120	1/ 12028	1	0.00997672	1	gene18285	NCAPH
1	GO:0072587	MF	DNA topoisomerase type II (double strand cut, ATP-hydrolyzing) activator activity	1/ 120	1/ 12028	1	0.00997672	1	gene18285	NCAPH
1	GO:0044547	MF	DNA topoisomerase binding	1/ 120	1/ 12028	1	0.00997672	1	gene18285	NCAPH
1	GO:0034590	MF	L-hydroxyproline transmembrane transporter activity	1/ 120	1/ 12028	1	0.00997672	1	gene15645	SLC1A4
1	GO:0023030	MF	MHC class Ib protein binding, via antigen binding groove	1/ 120	1/ 12028	1	0.00997672	1	gene9941	FAM49B
1	GO:0015184	MF	L-cystine transmembrane transporter activity	1/ 120	1/ 12028	1	0.00997672	1	gene15645	SLC1A4
1	GO:0010852	MF	cyclase inhibitor activity	1/ 120	1/ 12028	1	0.00997672	1	gene11139	PDZD3
1	GO:0005220	MF	inositol 1,4,5-trisphosphate-sensitive calcium-release channel activity	1/ 120	1/ 12028	1	0.00997672	1	gene9741	ITPR2
1	GO:0016170	MF	interleukin-15 receptor binding	1/ 120	1/ 12028	1	0.00997672	1	gene16004	SYK
1	GO:0003847	MF	1-alkyl-2-acetylglycerophosphocholine esterase activity	1/ 120	1/ 12028	1	0.00997672	1	gene9713	PLA2G7
1	GO:0030251	MF	guanylate cyclase inhibitor activity	1/ 120	1/ 12028	1	0.00997672	1	gene11139	PDZD3
1	GO:0023029	MF	MHC class Ib protein binding	1/ 120	1/ 12028	1	0.00997672	1	gene9941	FAM49B
1	GO:0015195	MF	L-threonine transmembrane transporter activity	1/ 120	1/ 12028	1	0.00997672	1	gene15645	SLC1A4
2	GO:0032813	MF	tumor necrosis factor receptor superfamily binding	2/ 120	17/ 12028	0.117647	0.0121729	1	gene8744;gene3669	TRAF2;TRAF5
7	GO:0042578	MF	phosphoric ester hydrolase activity	7/ 120	251/ 12028	0.0278884	0.0128252	1	gene12504;gene16929;gene16540;gene12495;gene13131;gene7658;gene18465	PPM1J;SMPD2;DUSP12;PTPN22;PTPRC;TAB1;PTPN6
23	GO:0140096	MF	catalytic activity, acting on a protein	23/ 120	1393/ 12028	0.0165111	0.0139762	1	gene16540;gene12495;gene7658;gene16744;gene5176;gene1335;gene20751;gene11383;gene10291;gene12504;gene13918;gene3005;gene19480;gene16004;gene1157;gene20461;gene6301;gene10080;gene13131;gene556;gene3858;gene10479;gene18465	DUSP12;PTPN22;TAB1;STRADA;PSKH1;LOC106040700;LOC106029620;CLK1;AREL1;PPM1J;HEMK1;TXK;METAP1;SYK;STK4;ADRBK1;USP40;XIAP;PTPRC;GRK4;G2E3;LYN;PTPN6
13	GO:0098772	MF	molecular function regulator	13/ 120	653/ 12028	0.0199081	0.0144019	1	gene18285;gene5524;gene7619;gene10080;gene14021;gene3533;gene7610;gene14267;gene7658;gene16744;gene19516;gene11139;gene10548	NCAPH;ADAP1;SH3BP1;XIAP;DOCK8;ANHX;RAC2;LOC106043193;TAB1;STRADA;LOC106048981;PDZD3;LOC106039127
3	GO:0019887	MF	protein kinase regulator activity	3/ 120	57/ 12028	0.0526316	0.0191717	1	gene16744;gene7610;gene7658	STRADA;RAC2;TAB1
1	GO:0048273	MF	mitogen-activated protein kinase p38 binding	1/ 120	2/ 12028	0.5	0.0198547	1	gene7658	TAB1
1	GO:0051864	MF	histone demethylase activity (H3-K36 specific)	1/ 120	2/ 12028	0.5	0.0198547	1	gene1335	LOC106040700
1	GO:0033829	MF	O-fucosylpeptide 3-beta-N-acetylglucosaminyltransferase activity	1/ 120	2/ 12028	0.5	0.0198547	1	gene7614	MFNG
1	GO:0015193	MF	L-proline transmembrane transporter activity	1/ 120	2/ 12028	0.5	0.0198547	1	gene15645	SLC1A4
2	GO:0019209	MF	kinase activator activity	2/ 120	23/ 12028	0.0869565	0.0217824	1	gene16744;gene7658	STRADA;TAB1
2	GO:0030295	MF	protein kinase activator activity	2/ 120	23/ 12028	0.0869565	0.0217824	1	gene16744;gene7658	STRADA;TAB1
3	GO:0019207	MF	kinase regulator activity	3/ 120	63/ 12028	0.047619	0.0249287	1	gene16744;gene7610;gene7658	STRADA;RAC2;TAB1
1	GO:0022889	MF	serine transmembrane transporter activity	1/ 120	3/ 12028	0.333333	0.029635	1	gene15645	SLC1A4
1	GO:0032453	MF	histone demethylase activity (H3-K4 specific)	1/ 120	3/ 12028	0.333333	0.029635	1	gene1335	LOC106040700
1	GO:0047499	MF	calcium-independent phospholipase A2 activity	1/ 120	3/ 12028	0.333333	0.029635	1	gene9713	PLA2G7
1	GO:0030249	MF	guanylate cyclase regulator activity	1/ 120	3/ 12028	0.333333	0.029635	1	gene11139	PDZD3
1	GO:0000099	MF	sulfur amino acid transmembrane transporter activity	1/ 120	3/ 12028	0.333333	0.029635	1	gene15645	SLC1A4
1	GO:0043027	MF	cysteine-type endopeptidase inhibitor activity involved in apoptotic process	1/ 120	3/ 12028	0.333333	0.029635	1	gene10080	XIAP
1	GO:0010851	MF	cyclase regulator activity	1/ 120	3/ 12028	0.333333	0.029635	1	gene11139	PDZD3
1	GO:0072349	MF	modified amino acid transmembrane transporter activity	1/ 120	3/ 12028	0.333333	0.029635	1	gene15645	SLC1A4
1	GO:0015278	MF	calcium-release channel activity	1/ 120	3/ 12028	0.333333	0.029635	1	gene9741	ITPR2
1	GO:0030898	MF	actin-dependent ATPase activity	1/ 120	3/ 12028	0.333333	0.029635	1	gene18970	MYO1F
1	GO:0004813	MF	alanine-tRNA ligase activity	1/ 120	3/ 12028	0.333333	0.029635	1	gene2015	AARS2
1	GO:0015194	MF	L-serine transmembrane transporter activity	1/ 120	3/ 12028	0.333333	0.029635	1	gene15645	SLC1A4
3	GO:0004866	MF	endopeptidase inhibitor activity	3/ 120	70/ 12028	0.0428571	0.0326939	1	gene19516;gene10548;gene10080	LOC106048981;LOC106039127;XIAP
2	GO:0004722	MF	protein serine/threonine phosphatase activity	2/ 120	29/ 12028	0.0689655	0.0336296	1	gene12504;gene7658	PPM1J;TAB1
4	GO:0060589	MF	nucleoside-triphosphatase regulator activity	4/ 120	122/ 12028	0.0327869	0.0336819	1	gene3533;gene18285;gene5524;gene7619	ANHX;NCAPH;ADAP1;SH3BP1
3	GO:0061135	MF	endopeptidase regulator activity	3/ 120	71/ 12028	0.0422535	0.0338948	1	gene19516;gene10548;gene10080	LOC106048981;LOC106039127;XIAP
3	GO:0004713	MF	protein tyrosine kinase activity	3/ 120	71/ 12028	0.0422535	0.0338948	1	gene16004;gene10479;gene3005	SYK;LYN;TXK
3	GO:0030414	MF	peptidase inhibitor activity	3/ 120	74/ 12028	0.0405405	0.0376334	1	gene19516;gene10548;gene10080	LOC106048981;LOC106039127;XIAP
3	GO:0005126	MF	cytokine receptor binding	3/ 120	75/ 12028	0.04	0.0389247	1	gene8744;gene16004;gene3669	TRAF2;SYK;TRAF5
1	GO:0046920	MF	alpha-(1->3)-fucosyltransferase activity	1/ 120	4/ 12028	0.25	0.0393185	1	gene8754	FUT7
1	GO:0008139	MF	nuclear localization sequence binding	1/ 120	4/ 12028	0.25	0.0393185	1	gene6479	KPNA2
1	GO:0004724	MF	magnesium-dependent protein serine/threonine phosphatase activity	1/ 120	4/ 12028	0.25	0.0393185	1	gene7658	TAB1
1	GO:0022858	MF	alanine transmembrane transporter activity	1/ 120	4/ 12028	0.25	0.0393185	1	gene15645	SLC1A4
1	GO:0015180	MF	L-alanine transmembrane transporter activity	1/ 120	4/ 12028	0.25	0.0393185	1	gene15645	SLC1A4
1	GO:0016251	MF	RNA polymerase II general transcription initiation factor activity	1/ 120	4/ 12028	0.25	0.0393185	1	gene3968	TAF5
1	GO:0017162	MF	aryl hydrocarbon receptor binding	1/ 120	4/ 12028	0.25	0.0393185	1	gene12122	TAF4
1	GO:0140223	MF	general transcription initiation factor activity	1/ 120	4/ 12028	0.25	0.0393185	1	gene3968	TAF5
10	GO:0016773	MF	phosphotransferase activity, alcohol group as acceptor	10/ 120	525/ 12028	0.0190476	0.0415105	1	gene1157;gene20461;gene3005;gene11383;gene556;gene16744;gene5176;gene16004;gene1417;gene10479	STK4;ADRBK1;TXK;CLK1;GRK4;STRADA;PSKH1;SYK;DGKZ;LYN
3	GO:0061134	MF	peptidase regulator activity	3/ 120	80/ 12028	0.0375	0.045715	1	gene19516;gene10548;gene10080	LOC106048981;LOC106039127;XIAP
9	GO:0004672	MF	protein kinase activity	9/ 120	450/ 12028	0.02	0.0460217	1	gene1157;gene20461;gene3005;gene11383;gene556;gene16744;gene5176;gene16004;gene10479	STK4;ADRBK1;TXK;CLK1;GRK4;STRADA;PSKH1;SYK;LYN
3	GO:0004725	MF	protein tyrosine phosphatase activity	3/ 120	82/ 12028	0.0365854	0.048585	1	gene12495;gene18465;gene13131	PTPN22;PTPN6;PTPRC
11	GO:0019899	MF	enzyme binding	11/ 120	581/ 12028	0.0189329	0.0486575	1	gene18285;gene7610;gene17622;gene14267;gene6479;gene3669;gene12495;gene14021;gene16015;gene7658;gene16744	NCAPH;RAC2;FMNL1;LOC106043193;KPNA2;TRAF5;PTPN22;DOCK8;CDC42SE2;TAB1;STRADA
1	GO:0031996	MF	thioesterase binding	1/ 120	5/ 12028	0.2	0.0489061	1	gene3669	TRAF5
1	GO:0051019	MF	mitogen-activated protein kinase binding	1/ 120	5/ 12028	0.2	0.0489061	1	gene7658	TAB1
25	GO:0043168	MF	anion binding	25/ 120	1735/ 12028	0.0144092	0.0499658	1	gene2442;gene10067;gene2015;gene16744;gene5176;gene5347;gene5524;gene18090;gene18970;gene11383;gene9741;gene14963;gene9846;gene3005;gene10737;gene7403;gene7610;gene16004;gene1157;gene20461;gene19021;gene556;gene9713;gene1417;gene10479	SNX10;LOC106038552;AARS2;STRADA;PSKH1;SEPT12;ADAP1;SNX22;MYO1F;CLK1;ITPR2;DCK;KIF15;TXK;MCM6;KIF2A;RAC2;SYK;STK4;ADRBK1;RAB44;GRK4;PLA2G7;DGKZ;LYN

## Sheet: blue
Number	GO ID	Term Type	Description	Ratio_in_study	Ratio_in_pop	Rich factor	Pvalue	Padjust	Gene_ids	Gene_names
5	GO:0048513	BP	animal organ development	5/ 28	222/ 12028	0.0225225	0.000142292	0.673164	gene2646;gene2519;gene3016;gene4032;gene13850	BMP5;RARB;SGCB;TCF7L2;SH3PXD2B
2	GO:0002068	BP	glandular epithelial cell development	2/ 28	8/ 12028	0.25	0.000145068	0.673164	gene2646;gene2519	BMP5;RARB
2	GO:0032350	BP	regulation of hormone metabolic process	2/ 28	8/ 12028	0.25	0.000145068	0.673164	gene2646;gene4032	BMP5;TCF7L2
2	GO:0010559	BP	regulation of glycoprotein biosynthetic process	2/ 28	12/ 12028	0.166667	0.000339981	0.788812	gene4032;gene2754	TCF7L2;NECAB1
2	GO:1903018	BP	regulation of glycoprotein metabolic process	2/ 28	12/ 12028	0.166667	0.000339981	0.788812	gene4032;gene2754	TCF7L2;NECAB1
2	GO:0002066	BP	columnar/cuboidal epithelial cell development	2/ 28	12/ 12028	0.166667	0.000339981	0.788812	gene2646;gene2519	BMP5;RARB
4	GO:0048468	BP	cell development	4/ 28	160/ 12028	0.025	0.000481354	0.810168	gene2646;gene2519;gene3016;gene16082	BMP5;RARB;SGCB;LOC106045189
2	GO:0060411	BP	cardiac septum morphogenesis	2/ 28	15/ 12028	0.133333	0.000538546	0.810168	gene2646;gene2519	BMP5;RARB
7	GO:0048856	BP	anatomical structure development	7/ 28	654/ 12028	0.0107034	0.000590578	0.810168	gene3016;gene16082;gene4032;gene2646;gene2357;gene2519;gene13850	SGCB;LOC106045189;TCF7L2;BMP5;FZD7;RARB;SH3PXD2B
6	GO:0048869	BP	cellular developmental process	6/ 28	513/ 12028	0.0116959	0.000987244	0.810168	gene3016;gene16082;gene4032;gene2646;gene6519;gene2519	SGCB;LOC106045189;TCF7L2;BMP5;HLF;RARB
2	GO:0048747	BP	muscle fiber development	2/ 28	22/ 12028	0.0909091	0.00117292	0.810168	gene3016;gene16082	SGCB;LOC106045189
2	GO:0055001	BP	muscle cell development	2/ 28	28/ 12028	0.0714286	0.00190283	0.810168	gene3016;gene16082	SGCB;LOC106045189
2	GO:0055002	BP	striated muscle cell development	2/ 28	28/ 12028	0.0714286	0.00190283	0.810168	gene3016;gene16082	SGCB;LOC106045189
8	GO:0032502	BP	developmental process	8/ 28	1057/ 12028	0.00756859	0.00218306	0.810168	gene3016;gene16082;gene4032;gene2646;gene2357;gene6519;gene2519;gene13850	SGCB;LOC106045189;TCF7L2;BMP5;FZD7;HLF;RARB;SH3PXD2B
2	GO:0007423	BP	sensory organ development	2/ 28	30/ 12028	0.0666667	0.00218348	0.810168	gene2646;gene13850	BMP5;SH3PXD2B
1	GO:0021502	BP	neural fold elevation formation	1/ 28	1/ 12028	1	0.0023279	0.810168	gene2646	BMP5
1	GO:0019285	BP	glycine betaine biosynthetic process from choline	1/ 28	1/ 12028	1	0.0023279	0.810168	gene19474	CHDH
1	GO:0097084	BP	vascular associated smooth muscle cell development	1/ 28	1/ 12028	1	0.0023279	0.810168	gene3016	SGCB
1	GO:0090032	BP	negative regulation of steroid hormone biosynthetic process	1/ 28	1/ 12028	1	0.0023279	0.810168	gene2646	BMP5
1	GO:0032345	BP	negative regulation of aldosterone metabolic process	1/ 28	1/ 12028	1	0.0023279	0.810168	gene2646	BMP5
1	GO:0048625	BP	myoblast fate commitment	1/ 28	1/ 12028	1	0.0023279	0.810168	gene4032	TCF7L2
1	GO:0032348	BP	negative regulation of aldosterone biosynthetic process	1/ 28	1/ 12028	1	0.0023279	0.810168	gene2646	BMP5
1	GO:0070660	BP	inner ear receptor cell differentiation involved in inner ear sensory epithelium regeneration	1/ 28	1/ 12028	1	0.0023279	0.810168	gene2519	RARB
1	GO:1903867	BP	extraembryonic membrane development	1/ 28	1/ 12028	1	0.0023279	0.810168	gene2646	BMP5
1	GO:0042490	BP	mechanoreceptor differentiation	1/ 28	1/ 12028	1	0.0023279	0.810168	gene2519	RARB
1	GO:0031455	BP	glycine betaine metabolic process	1/ 28	1/ 12028	1	0.0023279	0.810168	gene19474	CHDH
1	GO:0031456	BP	glycine betaine biosynthetic process	1/ 28	1/ 12028	1	0.0023279	0.810168	gene19474	CHDH
1	GO:0060113	BP	inner ear receptor cell differentiation	1/ 28	1/ 12028	1	0.0023279	0.810168	gene2519	RARB
1	GO:0003272	BP	endocardial cushion formation	1/ 28	1/ 12028	1	0.0023279	0.810168	gene2646	BMP5
1	GO:1905069	BP	allantois development	1/ 28	1/ 12028	1	0.0023279	0.810168	gene2646	BMP5
1	GO:2000675	BP	negative regulation of type B pancreatic cell apoptotic process	1/ 28	1/ 12028	1	0.0023279	0.810168	gene4032	TCF7L2
1	GO:0031947	BP	negative regulation of glucocorticoid biosynthetic process	1/ 28	1/ 12028	1	0.0023279	0.810168	gene2646	BMP5
1	GO:0031944	BP	negative regulation of glucocorticoid metabolic process	1/ 28	1/ 12028	1	0.0023279	0.810168	gene2646	BMP5
1	GO:0070656	BP	mechanoreceptor differentiation involved in mechanosensory epithelium regeneration	1/ 28	1/ 12028	1	0.0023279	0.810168	gene2519	RARB
1	GO:2000065	BP	negative regulation of cortisol biosynthetic process	1/ 28	1/ 12028	1	0.0023279	0.810168	gene2646	BMP5
1	GO:1904837	BP	beta-catenin-TCF complex assembly	1/ 28	1/ 12028	1	0.0023279	0.810168	gene4032	TCF7L2
1	GO:0071729	BP	beak morphogenesis	1/ 28	1/ 12028	1	0.0023279	0.810168	gene2519	RARB
1	GO:0003344	BP	pericardium morphogenesis	1/ 28	1/ 12028	1	0.0023279	0.810168	gene2646	BMP5
1	GO:0070016	MF	armadillo repeat domain binding	1/ 28	1/ 12028	1	0.0023279	0.810168	gene4032	TCF7L2
1	GO:0008812	MF	choline dehydrogenase activity	1/ 28	1/ 12028	1	0.0023279	0.810168	gene19474	CHDH
3	GO:0010817	BP	regulation of hormone levels	3/ 28	119/ 12028	0.0252101	0.00258258	0.874666	gene4032;gene16111;gene2646	TCF7L2;RAB11FIP2;BMP5
2	GO:0050679	BP	positive regulation of epithelial cell proliferation	2/ 28	33/ 12028	0.0606061	0.00263889	0.874666	gene2646;gene4032	BMP5;TCF7L2
2	GO:0002064	BP	epithelial cell development	2/ 28	40/ 12028	0.05	0.00385935	0.887493	gene2646;gene2519	BMP5;RARB
1	GO:0071800	BP	podosome assembly	1/ 28	2/ 12028	0.5	0.00465058	0.887493	gene13850	SH3PXD2B
1	GO:0090030	BP	regulation of steroid hormone biosynthetic process	1/ 28	2/ 12028	0.5	0.00465058	0.887493	gene2646	BMP5
1	GO:0072378	BP	blood coagulation, fibrin clot formation	1/ 28	2/ 12028	0.5	0.00465058	0.887493	gene6683	F13A1
1	GO:0032347	BP	regulation of aldosterone biosynthetic process	1/ 28	2/ 12028	0.5	0.00465058	0.887493	gene2646	BMP5
1	GO:0019695	BP	choline metabolic process	1/ 28	2/ 12028	0.5	0.00465058	0.887493	gene19474	CHDH
1	GO:0043569	BP	negative regulation of insulin-like growth factor receptor signaling pathway	1/ 28	2/ 12028	0.5	0.00465058	0.887493	gene2646	BMP5
1	GO:0097065	BP	anterior head development	1/ 28	2/ 12028	0.5	0.00465058	0.887493	gene2646	BMP5
1	GO:0032344	BP	regulation of aldosterone metabolic process	1/ 28	2/ 12028	0.5	0.00465058	0.887493	gene2646	BMP5
1	GO:0055012	BP	ventricular cardiac muscle cell differentiation	1/ 28	2/ 12028	0.5	0.00465058	0.887493	gene2519	RARB
1	GO:2000674	BP	regulation of type B pancreatic cell apoptotic process	1/ 28	2/ 12028	0.5	0.00465058	0.887493	gene4032	TCF7L2
1	GO:0035668	BP	TRAM-dependent toll-like receptor signaling pathway	1/ 28	2/ 12028	0.5	0.00465058	0.887493	gene16111	RAB11FIP2
1	GO:0035669	BP	TRAM-dependent toll-like receptor 4 signaling pathway	1/ 28	2/ 12028	0.5	0.00465058	0.887493	gene16111	RAB11FIP2
1	GO:0031946	BP	regulation of glucocorticoid biosynthetic process	1/ 28	2/ 12028	0.5	0.00465058	0.887493	gene2646	BMP5
1	GO:0044334	BP	canonical Wnt signaling pathway involved in positive regulation of epithelial to mesenchymal transition	1/ 28	2/ 12028	0.5	0.00465058	0.887493	gene4032	TCF7L2
1	GO:0032353	BP	negative regulation of hormone biosynthetic process	1/ 28	2/ 12028	0.5	0.00465058	0.887493	gene2646	BMP5
1	GO:0032351	BP	negative regulation of hormone metabolic process	1/ 28	2/ 12028	0.5	0.00465058	0.887493	gene2646	BMP5
1	GO:2000064	BP	regulation of cortisol biosynthetic process	1/ 28	2/ 12028	0.5	0.00465058	0.887493	gene2646	BMP5
1	GO:0046951	BP	ketone body biosynthetic process	1/ 28	2/ 12028	0.5	0.00465058	0.887493	gene2647	HMGCLL1
2	GO:0007178	BP	transmembrane receptor protein serine/threonine kinase signaling pathway	2/ 28	44/ 12028	0.0454545	0.0046539	0.887493	gene2646;gene377	BMP5;BMPR1A
1	GO:0044214	CC	spanning component of plasma membrane	1/ 28	2/ 12028	0.5	0.00465058	0.887493	gene377	BMPR1A
1	GO:1990907	CC	beta-catenin-TCF complex	1/ 28	2/ 12028	0.5	0.00465058	0.887493	gene4032	TCF7L2
1	GO:0089717	CC	spanning component of membrane	1/ 28	2/ 12028	0.5	0.00465058	0.887493	gene377	BMPR1A
1	GO:0070369	CC	beta-catenin-TCF7L2 complex	1/ 28	2/ 12028	0.5	0.00465058	0.887493	gene4032	TCF7L2
22	GO:0005488	MF	binding	22/ 28	6235/ 12028	0.00352847	0.00431274	0.887493	gene5059;gene6683;gene5700;gene13751;gene1800;gene6519;gene1566;gene18779;gene4032;gene20353;gene18555;gene9865;gene2754;gene2646;gene2519;gene14052;gene19474;gene377;gene6322;gene16111;gene18354;gene13850	LOC106032947;F13A1;TLN2;ZEB1;ANO6;HLF;LOC106045814;BNC2;TCF7L2;LOC106049866;COMP;FYCO1;NECAB1;BMP5;RARB;LPAR4;CHDH;BMPR1A;IQCA1;RAB11FIP2;LIMA1;SH3PXD2B
1	GO:0016833	MF	oxo-acid-lyase activity	1/ 28	2/ 12028	0.5	0.00465058	0.887493	gene2647	HMGCLL1
1	GO:0070700	MF	BMP receptor binding	1/ 28	2/ 12028	0.5	0.00465058	0.887493	gene2646	BMP5
1	GO:0005025	MF	transforming growth factor beta receptor activity, type I	1/ 28	2/ 12028	0.5	0.00465058	0.887493	gene377	BMPR1A
1	GO:0004419	MF	hydroxymethylglutaryl-CoA lyase activity	1/ 28	2/ 12028	0.5	0.00465058	0.887493	gene2647	HMGCLL1
1	GO:0070696	MF	transmembrane receptor protein serine/threonine kinase binding	1/ 28	2/ 12028	0.5	0.00465058	0.887493	gene2646	BMP5
1	GO:0035727	MF	lysophosphatidic acid binding	1/ 28	2/ 12028	0.5	0.00465058	0.887493	gene14052	LPAR4
1	GO:0010908	BP	regulation of heparan sulfate proteoglycan biosynthetic process	1/ 28	3/ 12028	0.333333	0.00696804	1	gene4032	TCF7L2
1	GO:0010909	BP	positive regulation of heparan sulfate proteoglycan biosynthetic process	1/ 28	3/ 12028	0.333333	0.00696804	1	gene4032	TCF7L2
1	GO:0007223	BP	Wnt signaling pathway, calcium modulating pathway	1/ 28	3/ 12028	0.333333	0.00696804	1	gene4032	TCF7L2
1	GO:0061458	BP	reproductive system development	1/ 28	3/ 12028	0.333333	0.00696804	1	gene2646	BMP5
1	GO:0060322	BP	head development	1/ 28	3/ 12028	0.333333	0.00696804	1	gene2646	BMP5
1	GO:0072376	BP	protein activation cascade	1/ 28	3/ 12028	0.333333	0.00696804	1	gene6683	F13A1
1	GO:0030539	BP	male genitalia development	1/ 28	3/ 12028	0.333333	0.00696804	1	gene2646	BMP5
1	GO:0010566	BP	regulation of ketone biosynthetic process	1/ 28	3/ 12028	0.333333	0.00696804	1	gene2646	BMP5
1	GO:0006578	BP	amino-acid betaine biosynthetic process	1/ 28	3/ 12028	0.333333	0.00696804	1	gene19474	CHDH
1	GO:0002407	BP	dendritic cell chemotaxis	1/ 28	3/ 12028	0.333333	0.00696804	1	gene1800	ANO6
1	GO:1902224	BP	ketone body metabolic process	1/ 28	3/ 12028	0.333333	0.00696804	1	gene2647	HMGCLL1
1	GO:0003417	BP	growth plate cartilage development	1/ 28	3/ 12028	0.333333	0.00696804	1	gene2519	RARB
1	GO:0021756	BP	striatum development	1/ 28	3/ 12028	0.333333	0.00696804	1	gene2519	RARB
1	GO:0031943	BP	regulation of glucocorticoid metabolic process	1/ 28	3/ 12028	0.333333	0.00696804	1	gene2646	BMP5
1	GO:0043570	BP	maintenance of DNA repeat elements	1/ 28	3/ 12028	0.333333	0.00696804	1	gene4032	TCF7L2
1	GO:0060037	BP	pharyngeal system development	1/ 28	3/ 12028	0.333333	0.00696804	1	gene2646	BMP5
1	GO:1902730	BP	positive regulation of proteoglycan biosynthetic process	1/ 28	3/ 12028	0.333333	0.00696804	1	gene4032	TCF7L2
1	GO:0046950	BP	cellular ketone body metabolic process	1/ 28	3/ 12028	0.333333	0.00696804	1	gene2647	HMGCLL1
1	GO:0061384	BP	heart trabecula morphogenesis	1/ 28	3/ 12028	0.333333	0.00696804	1	gene2646	BMP5
2	GO:0050678	BP	regulation of epithelial cell proliferation	2/ 28	57/ 12028	0.0350877	0.0077066	1	gene2646;gene4032	BMP5;TCF7L2
1	GO:0055007	BP	cardiac muscle cell differentiation	1/ 28	4/ 12028	0.25	0.0092803	1	gene2519	RARB
1	GO:0046885	BP	regulation of hormone biosynthetic process	1/ 28	4/ 12028	0.25	0.0092803	1	gene2646	BMP5
1	GO:0043583	BP	ear development	1/ 28	4/ 12028	0.25	0.0092803	1	gene2646	BMP5
1	GO:0007016	BP	obsolete cytoskeletal anchoring at plasma membrane	1/ 28	4/ 12028	0.25	0.0092803	1	gene5700	TLN2
1	GO:0006577	BP	amino-acid betaine metabolic process	1/ 28	4/ 12028	0.25	0.0092803	1	gene19474	CHDH
1	GO:0061383	BP	trabecula morphogenesis	1/ 28	4/ 12028	0.25	0.0092803	1	gene2646	BMP5
1	GO:1902931	BP	negative regulation of alcohol biosynthetic process	1/ 28	4/ 12028	0.25	0.0092803	1	gene2646	BMP5
1	GO:0061588	BP	calcium activated phospholipid scrambling	1/ 28	5/ 12028	0.2	0.0115874	1	gene1800	ANO6
1	GO:0048384	BP	retinoic acid receptor signaling pathway	1/ 28	5/ 12028	0.2	0.0115874	1	gene2519	RARB
1	GO:0046827	BP	positive regulation of protein export from nucleus	1/ 28	5/ 12028	0.2	0.0115874	1	gene4032	TCF7L2
1	GO:1902476	BP	chloride transmembrane transport	1/ 28	5/ 12028	0.2	0.0115874	1	gene1800	ANO6
1	GO:0098661	BP	inorganic anion transmembrane transport	1/ 28	5/ 12028	0.2	0.0115874	1	gene1800	ANO6
1	GO:0036336	BP	dendritic cell migration	1/ 28	5/ 12028	0.2	0.0115874	1	gene1800	ANO6
1	GO:0034142	BP	toll-like receptor 4 signaling pathway	1/ 28	5/ 12028	0.2	0.0115874	1	gene16111	RAB11FIP2
1	GO:0002756	BP	MyD88-independent toll-like receptor signaling pathway	1/ 28	5/ 12028	0.2	0.0115874	1	gene16111	RAB11FIP2
3	GO:0045944	BP	positive regulation of transcription by RNA polymerase II	3/ 28	210/ 12028	0.0142857	0.012463	1	gene2646;gene2519;gene4032	BMP5;RARB;TCF7L2
6	GO:0065008	BP	regulation of biological quality	6/ 28	862/ 12028	0.00696056	0.0128332	1	gene14052;gene4032;gene2646;gene1800;gene16111;gene18354	LPAR4;TCF7L2;BMP5;ANO6;RAB11FIP2;LIMA1
1	GO:1903020	BP	positive regulation of glycoprotein metabolic process	1/ 28	6/ 12028	0.166667	0.0138892	1	gene4032	TCF7L2
1	GO:0010560	BP	positive regulation of glycoprotein biosynthetic process	1/ 28	6/ 12028	0.166667	0.0138892	1	gene4032	TCF7L2
1	GO:0043567	BP	regulation of insulin-like growth factor receptor signaling pathway	1/ 28	6/ 12028	0.166667	0.0138892	1	gene2646	BMP5
1	GO:0002011	BP	morphogenesis of an epithelial sheet	1/ 28	6/ 12028	0.166667	0.0138892	1	gene2646	BMP5
1	GO:0030902	BP	hindbrain development	1/ 28	6/ 12028	0.166667	0.0138892	1	gene2646	BMP5
1	GO:0003148	BP	outflow tract septum morphogenesis	1/ 28	6/ 12028	0.166667	0.0138892	1	gene2519	RARB
1	GO:0060351	BP	cartilage development involved in endochondral bone morphogenesis	1/ 28	6/ 12028	0.166667	0.0138892	1	gene2519	RARB
1	GO:0017121	BP	plasma membrane phospholipid scrambling	1/ 28	6/ 12028	0.166667	0.0138892	1	gene1800	ANO6
1	GO:0003323	BP	type B pancreatic cell development	1/ 28	6/ 12028	0.166667	0.0138892	1	gene2646	BMP5
1	GO:1904036	BP	negative regulation of epithelial cell apoptotic process	1/ 28	7/ 12028	0.142857	0.016186	1	gene4032	TCF7L2
1	GO:0035773	BP	insulin secretion involved in cellular response to glucose stimulus	1/ 28	7/ 12028	0.142857	0.016186	1	gene16111	RAB11FIP2
1	GO:0035051	BP	cardiocyte differentiation	1/ 28	7/ 12028	0.142857	0.016186	1	gene2519	RARB
1	GO:0042984	BP	regulation of amyloid precursor protein biosynthetic process	1/ 28	7/ 12028	0.142857	0.016186	1	gene2754	NECAB1
1	GO:0048806	BP	genitalia development	1/ 28	7/ 12028	0.142857	0.016186	1	gene2646	BMP5
1	GO:0045939	BP	negative regulation of steroid metabolic process	1/ 28	8/ 12028	0.125	0.0184775	1	gene2646	BMP5
1	GO:1900006	BP	positive regulation of dendrite development	1/ 28	8/ 12028	0.125	0.0184775	1	gene2646	BMP5
1	GO:0031016	BP	pancreas development	1/ 28	8/ 12028	0.125	0.0184775	1	gene4032	TCF7L2
1	GO:0048566	BP	embryonic digestive tract development	1/ 28	8/ 12028	0.125	0.0184775	1	gene2519	RARB
1	GO:0010894	BP	negative regulation of steroid biosynthetic process	1/ 28	8/ 12028	0.125	0.0184775	1	gene2646	BMP5
1	GO:1902930	BP	regulation of alcohol biosynthetic process	1/ 28	8/ 12028	0.125	0.0184775	1	gene2646	BMP5
1	GO:0046825	BP	regulation of protein export from nucleus	1/ 28	9/ 12028	0.111111	0.0207639	1	gene4032	TCF7L2
1	GO:0010862	BP	positive regulation of pathway-restricted SMAD protein phosphorylation	1/ 28	9/ 12028	0.111111	0.0207639	1	gene2646	BMP5
1	GO:1904035	BP	regulation of epithelial cell apoptotic process	1/ 28	9/ 12028	0.111111	0.0207639	1	gene4032	TCF7L2
1	GO:0060349	BP	bone morphogenesis	1/ 28	9/ 12028	0.111111	0.0207639	1	gene2519	RARB
1	GO:0051482	BP	positive regulation of cytosolic calcium ion concentration involved in phospholipase C-activating G protein-coupled signaling pathway	1/ 28	9/ 12028	0.111111	0.0207639	1	gene14052	LPAR4
1	GO:0034204	BP	lipid translocation	1/ 28	9/ 12028	0.111111	0.0207639	1	gene1800	ANO6
1	GO:0035567	BP	non-canonical Wnt signaling pathway	1/ 28	9/ 12028	0.111111	0.0207639	1	gene4032	TCF7L2
1	GO:0045332	BP	phospholipid translocation	1/ 28	9/ 12028	0.111111	0.0207639	1	gene1800	ANO6
5	GO:0032501	BP	multicellular organismal process	5/ 28	699/ 12028	0.00715308	0.0210775	1	gene2646;gene2519;gene1800;gene2357;gene377	BMP5;RARB;ANO6;FZD7;BMPR1A
2	GO:0007389	BP	pattern specification process	2/ 28	100/ 12028	0.02	0.0224776	1	gene2646;gene377	BMP5;BMPR1A
1	GO:0055006	BP	cardiac cell development	1/ 28	10/ 12028	0.1	0.0230452	1	gene3016	SGCB
1	GO:0048741	BP	skeletal muscle fiber development	1/ 28	10/ 12028	0.1	0.0230452	1	gene16082	LOC106045189
1	GO:0071300	BP	cellular response to retinoic acid	1/ 28	10/ 12028	0.1	0.0230452	1	gene2519	RARB
1	GO:0097164	BP	ammonium ion metabolic process	1/ 28	10/ 12028	0.1	0.0230452	1	gene19474	CHDH
1	GO:0055013	BP	cardiac muscle cell development	1/ 28	10/ 12028	0.1	0.0230452	1	gene3016	SGCB
1	GO:0048048	BP	embryonic eye morphogenesis	1/ 28	10/ 12028	0.1	0.0230452	1	gene2519	RARB
1	GO:0051055	BP	negative regulation of lipid biosynthetic process	1/ 28	10/ 12028	0.1	0.0230452	1	gene2646	BMP5
1	GO:0032331	BP	negative regulation of chondrocyte differentiation	1/ 28	10/ 12028	0.1	0.0230452	1	gene2519	RARB
1	GO:0014904	BP	myotube cell development	1/ 28	10/ 12028	0.1	0.0230452	1	gene16082	LOC106045189
1	GO:0035025	BP	positive regulation of Rho protein signal transduction	1/ 28	10/ 12028	0.1	0.0230452	1	gene14052	LPAR4
1	GO:0007517	BP	muscle organ development	1/ 28	10/ 12028	0.1	0.0230452	1	gene3016	SGCB
2	GO:0048598	BP	embryonic morphogenesis	2/ 28	102/ 12028	0.0196078	0.0233237	1	gene2646;gene2519	BMP5;RARB
3	GO:0007155	BP	cell adhesion	3/ 28	270/ 12028	0.0111111	0.0242224	1	gene20353;gene18555;gene5700	LOC106049866;COMP;TLN2
3	GO:0022610	BP	biological adhesion	3/ 28	271/ 12028	0.0110701	0.0244558	1	gene20353;gene18555;gene5700	LOC106049866;COMP;TLN2
1	GO:0061037	BP	negative regulation of cartilage development	1/ 28	11/ 12028	0.0909091	0.0253213	1	gene2519	RARB
1	GO:0045833	BP	negative regulation of lipid metabolic process	1/ 28	11/ 12028	0.0909091	0.0253213	1	gene2646	BMP5
1	GO:0035116	BP	embryonic hindlimb morphogenesis	1/ 28	11/ 12028	0.0909091	0.0253213	1	gene2519	RARB
1	GO:0048565	BP	digestive tract development	1/ 28	11/ 12028	0.0909091	0.0253213	1	gene2519	RARB
1	GO:0006909	BP	phagocytosis	1/ 28	11/ 12028	0.0909091	0.0253213	1	gene16111	RAB11FIP2
1	GO:0097035	BP	regulation of membrane lipid distribution	1/ 28	11/ 12028	0.0909091	0.0253213	1	gene1800	ANO6
1	GO:0032024	BP	positive regulation of insulin secretion	1/ 28	11/ 12028	0.0909091	0.0253213	1	gene4032	TCF7L2
3	GO:0031327	BP	negative regulation of cellular biosynthetic process	3/ 28	280/ 12028	0.0107143	0.0266122	1	gene2646;gene2519;gene4032	BMP5;RARB;TCF7L2
1	GO:0048738	BP	cardiac muscle tissue development	1/ 28	12/ 12028	0.0833333	0.0275924	1	gene2646	BMP5
1	GO:0051897	BP	positive regulation of protein kinase B signaling	1/ 28	12/ 12028	0.0833333	0.0275924	1	gene4032	TCF7L2
1	GO:0001657	BP	ureteric bud development	1/ 28	12/ 12028	0.0833333	0.0275924	1	gene2519	RARB
1	GO:2001237	BP	negative regulation of extrinsic apoptotic signaling pathway	1/ 28	12/ 12028	0.0833333	0.0275924	1	gene4032	TCF7L2
1	GO:0061061	BP	muscle structure development	1/ 28	12/ 12028	0.0833333	0.0275924	1	gene3016	SGCB
3	GO:0009890	BP	negative regulation of biosynthetic process	3/ 28	286/ 12028	0.0104895	0.0281054	1	gene2646;gene2519;gene4032	BMP5;RARB;TCF7L2
3	GO:0042127	BP	regulation of cell population proliferation	3/ 28	291/ 12028	0.0103093	0.0293837	1	gene2646;gene2519;gene4032	BMP5;RARB;TCF7L2
1	GO:0046579	BP	positive regulation of Ras protein signal transduction	1/ 28	13/ 12028	0.0769231	0.0298583	1	gene14052	LPAR4
1	GO:0060348	BP	bone development	1/ 28	13/ 12028	0.0769231	0.0298583	1	gene13850	SH3PXD2B
1	GO:0035137	BP	hindlimb morphogenesis	1/ 28	13/ 12028	0.0769231	0.0298583	1	gene2519	RARB
1	GO:0060393	BP	regulation of pathway-restricted SMAD protein phosphorylation	1/ 28	13/ 12028	0.0769231	0.0298583	1	gene2646	BMP5
1	GO:0061448	BP	connective tissue development	1/ 28	13/ 12028	0.0769231	0.0298583	1	gene2519	RARB
1	GO:0030501	BP	positive regulation of bone mineralization	1/ 28	13/ 12028	0.0769231	0.0298583	1	gene1800	ANO6
1	GO:1901570	BP	fatty acid derivative biosynthetic process	1/ 28	13/ 12028	0.0769231	0.0298583	1	gene2647	HMGCLL1
1	GO:0018149	BP	peptide cross-linking	1/ 28	13/ 12028	0.0769231	0.0298583	1	gene6683	F13A1
3	GO:0045893	BP	positive regulation of transcription, DNA-templated	3/ 28	296/ 12028	0.0101351	0.0306928	1	gene2646;gene2519;gene4032	BMP5;RARB;TCF7L2
3	GO:1902680	BP	positive regulation of RNA biosynthetic process	3/ 28	297/ 12028	0.010101	0.0309583	1	gene2646;gene2519;gene4032	BMP5;RARB;TCF7L2
3	GO:1903508	BP	positive regulation of nucleic acid-templated transcription	3/ 28	297/ 12028	0.010101	0.0309583	1	gene2646;gene2519;gene4032	BMP5;RARB;TCF7L2
1	GO:0050810	BP	regulation of steroid biosynthetic process	1/ 28	14/ 12028	0.0714286	0.0321191	1	gene2646	BMP5
1	GO:0051146	BP	striated muscle cell differentiation	1/ 28	14/ 12028	0.0714286	0.0321191	1	gene2519	RARB
1	GO:0032526	BP	response to retinoic acid	1/ 28	14/ 12028	0.0714286	0.0321191	1	gene2519	RARB
1	GO:0072163	BP	mesonephric epithelium development	1/ 28	14/ 12028	0.0714286	0.0321191	1	gene2519	RARB
1	GO:0072164	BP	mesonephric tubule development	1/ 28	14/ 12028	0.0714286	0.0321191	1	gene2519	RARB
1	GO:0051057	BP	positive regulation of small GTPase mediated signal transduction	1/ 28	14/ 12028	0.0714286	0.0321191	1	gene14052	LPAR4
2	GO:0009888	BP	tissue development	2/ 28	124/ 12028	0.016129	0.0334665	1	gene2646;gene2519	BMP5;RARB
1	GO:0110151	BP	positive regulation of biomineralization	1/ 28	15/ 12028	0.0666667	0.0343749	1	gene1800	ANO6
1	GO:0048660	BP	regulation of smooth muscle cell proliferation	1/ 28	15/ 12028	0.0666667	0.0343749	1	gene4032	TCF7L2
1	GO:0060395	BP	SMAD protein signal transduction	1/ 28	15/ 12028	0.0666667	0.0343749	1	gene2646	BMP5
1	GO:0070169	BP	positive regulation of biomineral tissue development	1/ 28	15/ 12028	0.0666667	0.0343749	1	gene1800	ANO6
1	GO:0030073	BP	insulin secretion	1/ 28	15/ 12028	0.0666667	0.0343749	1	gene16111	RAB11FIP2
19	GO:0009987	BP	cellular process	19/ 28	5670/ 12028	0.00335097	0.035791	1	gene2646;gene3016;gene14052;gene16082;gene1566;gene4032;gene19474;gene6683;gene5700;gene2647;gene20353;gene18354;gene16111;gene6519;gene1800;gene2519;gene377;gene18555;gene13850	BMP5;SGCB;LPAR4;LOC106045189;LOC106045814;TCF7L2;CHDH;F13A1;TLN2;HMGCLL1;LOC106049866;LIMA1;RAB11FIP2;HLF;ANO6;RARB;BMPR1A;COMP;SH3PXD2B
3	GO:0042981	BP	regulation of apoptotic process	3/ 28	315/ 12028	0.00952381	0.0359474	1	gene2646;gene2519;gene4032	BMP5;RARB;TCF7L2
3	GO:0051254	BP	positive regulation of RNA metabolic process	3/ 28	316/ 12028	0.00949367	0.0362362	1	gene2646;gene2519;gene4032	BMP5;RARB;TCF7L2
2	GO:0008285	BP	negative regulation of cell population proliferation	2/ 28	130/ 12028	0.0153846	0.0364852	1	gene2646;gene2519	BMP5;RARB
1	GO:0045444	BP	fat cell differentiation	1/ 28	16/ 12028	0.0625	0.0366256	1	gene4032	TCF7L2
1	GO:0042398	BP	cellular modified amino acid biosynthetic process	1/ 28	16/ 12028	0.0625	0.0366256	1	gene19474	CHDH
1	GO:0007050	BP	cell cycle arrest	1/ 28	16/ 12028	0.0625	0.0366256	1	gene4032	TCF7L2
1	GO:0032092	BP	positive regulation of protein binding	1/ 28	16/ 12028	0.0625	0.0366256	1	gene4032	TCF7L2
1	GO:0032330	BP	regulation of chondrocyte differentiation	1/ 28	16/ 12028	0.0625	0.0366256	1	gene2519	RARB
1	GO:0030522	BP	intracellular receptor signaling pathway	1/ 28	16/ 12028	0.0625	0.0366256	1	gene2519	RARB
1	GO:0001568	BP	blood vessel development	1/ 28	16/ 12028	0.0625	0.0366256	1	gene4032	TCF7L2
1	GO:0035914	BP	skeletal muscle cell differentiation	1/ 28	16/ 12028	0.0625	0.0366256	1	gene6519	HLF
1	GO:0048592	BP	eye morphogenesis	1/ 28	16/ 12028	0.0625	0.0366256	1	gene2519	RARB
3	GO:0043067	BP	regulation of programmed cell death	3/ 28	320/ 12028	0.009375	0.0374036	1	gene2646;gene2519;gene4032	BMP5;RARB;TCF7L2
1	GO:0006821	BP	chloride transport	1/ 28	17/ 12028	0.0588235	0.0388712	1	gene1800	ANO6
1	GO:0030010	BP	establishment of cell polarity	1/ 28	17/ 12028	0.0588235	0.0388712	1	gene16111	RAB11FIP2
1	GO:0042692	BP	muscle cell differentiation	1/ 28	17/ 12028	0.0588235	0.0388712	1	gene2519	RARB
1	GO:0062014	BP	negative regulation of small molecule metabolic process	1/ 28	17/ 12028	0.0588235	0.0388712	1	gene2646	BMP5
3	GO:0009967	BP	positive regulation of signal transduction	3/ 28	327/ 12028	0.00917431	0.0394933	1	gene2646;gene4032;gene14052	BMP5;TCF7L2;LPAR4
2	GO:0000122	BP	negative regulation of transcription by RNA polymerase II	2/ 28	138/ 12028	0.0144928	0.0406681	1	gene2519;gene4032	RARB;TCF7L2
1	GO:0051216	BP	cartilage development	1/ 28	18/ 12028	0.0555556	0.0411118	1	gene2519	RARB
1	GO:0072073	BP	kidney epithelium development	1/ 28	18/ 12028	0.0555556	0.0411118	1	gene2519	RARB
1	GO:0090596	BP	sensory organ morphogenesis	1/ 28	18/ 12028	0.0555556	0.0411118	1	gene2519	RARB
1	GO:0001889	BP	liver development	1/ 28	18/ 12028	0.0555556	0.0411118	1	gene2519	RARB
1	GO:0048568	BP	embryonic organ development	1/ 28	18/ 12028	0.0555556	0.0411118	1	gene2519	RARB
3	GO:0030154	BP	cell differentiation	3/ 28	336/ 12028	0.00892857	0.0422671	1	gene2519;gene4032;gene6519	RARB;TCF7L2;HLF
2	GO:0008284	BP	positive regulation of cell population proliferation	2/ 28	141/ 12028	0.0141844	0.0422819	1	gene2646;gene4032	BMP5;TCF7L2
3	GO:0010941	BP	regulation of cell death	3/ 28	339/ 12028	0.00884956	0.0432133	1	gene2646;gene2519;gene4032	BMP5;RARB;TCF7L2
1	GO:0046824	BP	positive regulation of nucleocytoplasmic transport	1/ 28	19/ 12028	0.0526316	0.0433473	1	gene4032	TCF7L2
1	GO:0030835	BP	negative regulation of actin filament depolymerization	1/ 28	19/ 12028	0.0526316	0.0433473	1	gene18354	LIMA1
1	GO:0010565	BP	regulation of cellular ketone metabolic process	1/ 28	19/ 12028	0.0526316	0.0433473	1	gene2646	BMP5
1	GO:0034767	BP	positive regulation of ion transmembrane transport	1/ 28	19/ 12028	0.0526316	0.0433473	1	gene1800	ANO6
1	GO:0051017	BP	actin filament bundle assembly	1/ 28	19/ 12028	0.0526316	0.0433473	1	gene18354	LIMA1
1	GO:0090277	BP	positive regulation of peptide hormone secretion	1/ 28	19/ 12028	0.0526316	0.0433473	1	gene4032	TCF7L2
2	GO:0007275	BP	multicellular organism development	2/ 28	144/ 12028	0.0138889	0.0439197	1	gene2519;gene2357	RARB;FZD7
3	GO:0010557	BP	positive regulation of macromolecule biosynthetic process	3/ 28	343/ 12028	0.00874636	0.0444918	1	gene2646;gene2519;gene4032	BMP5;RARB;TCF7L2
3	GO:0045935	BP	positive regulation of nucleobase-containing compound metabolic process	3/ 28	346/ 12028	0.00867052	0.0454631	1	gene2646;gene2519;gene4032	BMP5;RARB;TCF7L2
1	GO:0009749	BP	response to glucose	1/ 28	20/ 12028	0.05	0.0455779	1	gene4032	TCF7L2
1	GO:0015914	BP	phospholipid transport	1/ 28	20/ 12028	0.05	0.0455779	1	gene1800	ANO6
1	GO:0015748	BP	organophosphate ester transport	1/ 28	20/ 12028	0.05	0.0455779	1	gene1800	ANO6
1	GO:0030509	BP	BMP signaling pathway	1/ 28	20/ 12028	0.05	0.0455779	1	gene2646	BMP5
1	GO:0019218	BP	regulation of steroid metabolic process	1/ 28	20/ 12028	0.05	0.0455779	1	gene2646	BMP5
1	GO:0015698	BP	inorganic anion transport	1/ 28	20/ 12028	0.05	0.0455779	1	gene1800	ANO6
2	GO:0007167	BP	enzyme linked receptor protein signaling pathway	2/ 28	147/ 12028	0.0136054	0.0455812	1	gene2646;gene377	BMP5;BMPR1A
1	GO:0034284	BP	response to monosaccharide	1/ 28	21/ 12028	0.047619	0.0478034	1	gene4032	TCF7L2
1	GO:0009746	BP	response to hexose	1/ 28	21/ 12028	0.047619	0.0478034	1	gene4032	TCF7L2
1	GO:1901568	BP	fatty acid derivative metabolic process	1/ 28	21/ 12028	0.047619	0.0478034	1	gene2647	HMGCLL1
1	GO:0050773	BP	regulation of dendrite development	1/ 28	21/ 12028	0.047619	0.0478034	1	gene2646	BMP5
1	GO:0060070	BP	canonical Wnt signaling pathway	1/ 28	21/ 12028	0.047619	0.0478034	1	gene4032	TCF7L2
3	GO:0031328	BP	positive regulation of cellular biosynthetic process	3/ 28	357/ 12028	0.00840336	0.0491162	1	gene2646;gene2519;gene4032	BMP5;RARB;TCF7L2
3	GO:0065003	BP	protein-containing complex assembly	3/ 28	359/ 12028	0.00835655	0.0497957	1	gene1566;gene4032;gene13850	LOC106045814;TCF7L2;SH3PXD2B
1	GO:0071664	CC	catenin-TCF7L2 complex	1/ 28	3/ 12028	0.333333	0.00696804	1	gene4032	TCF7L2
2	GO:0090575	CC	RNA polymerase II transcription regulator complex	2/ 28	61/ 12028	0.0327869	0.00878603	1	gene2519;gene4032	RARB;TCF7L2
1	GO:0016012	CC	sarcoglycan complex	1/ 28	5/ 12028	0.2	0.0115874	1	gene3016	SGCB
2	GO:0000790	CC	nuclear chromatin	2/ 28	72/ 12028	0.0277778	0.01208	1	gene1566;gene4032	LOC106045814;TCF7L2
2	GO:0032993	CC	protein-DNA complex	2/ 28	76/ 12028	0.0263158	0.0133926	1	gene1566;gene4032	LOC106045814;TCF7L2
1	GO:0001891	CC	phagocytic cup	1/ 28	6/ 12028	0.166667	0.0138892	1	gene16111	RAB11FIP2
2	GO:0000785	CC	chromatin	2/ 28	105/ 12028	0.0190476	0.0246175	1	gene1566;gene4032	LOC106045814;TCF7L2
1	GO:0016605	CC	PML body	1/ 28	14/ 12028	0.0714286	0.0321191	1	gene4032	TCF7L2
1	GO:0042383	CC	sarcolemma	1/ 28	20/ 12028	0.05	0.0455779	1	gene3016	SGCB
2	GO:0016604	CC	nuclear body	2/ 28	152/ 12028	0.0131579	0.0484018	1	gene14052;gene4032	LPAR4;TCF7L2
1	GO:0033612	MF	receptor serine/threonine kinase binding	1/ 28	3/ 12028	0.333333	0.00696804	1	gene2646	BMP5
3	GO:0000981	MF	DNA-binding transcription factor activity, RNA polymerase II-specific	3/ 28	170/ 12028	0.0176471	0.00701014	1	gene2519;gene4032;gene6519	RARB;TCF7L2;HLF
3	GO:0000977	MF	RNA polymerase II transcription regulatory region sequence-specific DNA binding	3/ 28	180/ 12028	0.0166667	0.00820163	1	gene2519;gene4032;gene6519	RARB;TCF7L2;HLF
1	GO:0070915	MF	lysophosphatidic acid receptor activity	1/ 28	4/ 12028	0.25	0.0092803	1	gene14052	LPAR4
1	GO:0045295	MF	gamma-catenin binding	1/ 28	5/ 12028	0.2	0.0115874	1	gene4032	TCF7L2
1	GO:0045125	MF	bioactive lipid receptor activity	1/ 28	7/ 12028	0.142857	0.016186	1	gene14052	LPAR4
3	GO:0000976	MF	transcription regulatory region sequence-specific DNA binding	3/ 28	233/ 12028	0.0128755	0.0164518	1	gene2519;gene4032;gene6519	RARB;TCF7L2;HLF
3	GO:0001067	MF	regulatory region nucleic acid binding	3/ 28	234/ 12028	0.0128205	0.0166398	1	gene2519;gene4032;gene6519	RARB;TCF7L2;HLF
1	GO:0005024	MF	transforming growth factor beta-activated receptor activity	1/ 28	8/ 12028	0.125	0.0184775	1	gene377	BMPR1A
3	GO:1990837	MF	sequence-specific double-stranded DNA binding	3/ 28	250/ 12028	0.012	0.0198131	1	gene2519;gene4032;gene6519	RARB;TCF7L2;HLF
2	GO:0051015	MF	actin filament binding	2/ 28	99/ 12028	0.020202	0.0220594	1	gene18354;gene5700	LIMA1;TLN2
1	GO:0003810	MF	protein-glutamine gamma-glutamyltransferase activity	1/ 28	10/ 12028	0.1	0.0230452	1	gene6683	F13A1
1	GO:0042813	MF	Wnt-activated receptor activity	1/ 28	10/ 12028	0.1	0.0230452	1	gene2357	FZD7
1	GO:0001103	MF	RNA polymerase II repressing transcription factor binding	1/ 28	11/ 12028	0.0909091	0.0253213	1	gene4032	TCF7L2
1	GO:0005160	MF	transforming growth factor beta receptor binding	1/ 28	11/ 12028	0.0909091	0.0253213	1	gene2646	BMP5
3	GO:0003690	MF	double-stranded DNA binding	3/ 28	279/ 12028	0.0107527	0.0263677	1	gene2519;gene4032;gene6519	RARB;TCF7L2;HLF
13	GO:0043167	MF	ion binding	13/ 28	3283/ 12028	0.00395979	0.0318787	1	gene9865;gene14052;gene6322;gene19474;gene377;gene6683;gene2754;gene20353;gene5059;gene2519;gene18354;gene18555;gene13850	FYCO1;LPAR4;IQCA1;CHDH;BMPR1A;F13A1;NECAB1;LOC106049866;LOC106032947;RARB;LIMA1;COMP;SH3PXD2B
1	GO:0016755	MF	transferase activity, transferring amino-acyl groups	1/ 28	14/ 12028	0.0714286	0.0321191	1	gene6683	F13A1
1	GO:0004675	MF	transmembrane receptor protein serine/threonine kinase activity	1/ 28	15/ 12028	0.0666667	0.0343749	1	gene377	BMPR1A
2	GO:0019901	MF	protein kinase binding	2/ 28	138/ 12028	0.0144928	0.0406681	1	gene4032;gene16111	TCF7L2;RAB11FIP2
1	GO:0004879	MF	nuclear receptor activity	1/ 28	18/ 12028	0.0555556	0.0411118	1	gene2519	RARB
1	GO:0098531	MF	ligand-activated transcription factor activity	1/ 28	18/ 12028	0.0555556	0.0411118	1	gene2519	RARB
1	GO:0030374	MF	nuclear receptor transcription coactivator activity	1/ 28	18/ 12028	0.0555556	0.0411118	1	gene2519	RARB
2	GO:0005543	MF	phospholipid binding	2/ 28	150/ 12028	0.0133333	0.0472659	1	gene14052;gene13850	LPAR4;SH3PXD2B

## Sheet: brown
Number	GO ID	Term Type	Description	Ratio_in_study	Ratio_in_pop	Rich factor	Pvalue	Padjust	Gene_ids	Gene_names
4	GO:0030057	CC	desmosome	4/ 78	6/ 12028	0.666667	2.43057e-08	0.000338359	gene16670;gene9162;gene17714;gene9164	PKP1;LOC106037565;PKP3;DSG2
7	GO:0050678	BP	regulation of epithelial cell proliferation	7/ 78	57/ 12028	0.122807	7.47316e-08	0.000520169	gene14167;gene18522;gene645;gene15756;gene7964;gene17154;gene11327	ESRP2;SFN;FGFBP1;ANXA8L156;SGPP2;EGFR;SERPINB5
14	GO:0005509	MF	calcium ion binding	14/ 78	435/ 12028	0.0321839	6.54805e-07	0.00303851	gene1358;gene7723;gene11570;gene157;gene7475;gene10183;gene19635;gene19634;gene19934;gene9163;gene9162;gene2975;gene17323;gene9164	LOC106042968;SCGN;MASP2;ANXA8L1;LOC106035673;LOC106038708;S100A16;LOC106049115;LOC106049424;LOC106037566;LOC106037565;VSNL1;LOC106046592;DSG2
8	GO:0098609	BP	cell-cell adhesion	8/ 78	135/ 12028	0.0592593	2.4777e-06	0.00723695	gene17714;gene6673;gene9163;gene9162;gene17154;gene16670;gene17323;gene9164	PKP3;DSP;LOC106037566;LOC106037565;EGFR;PKP1;LOC106046592;DSG2
3	GO:0008544	BP	epidermis development	3/ 78	5/ 12028	0.6	2.59929e-06	0.00723695	gene6621;gene17154;gene15756	EVPL;EGFR;ANXA8L156
4	GO:0005922	CC	connexin complex	4/ 78	19/ 12028	0.210526	5.89068e-06	0.0136674	gene9491;gene9490;gene11716;gene11717	GJB3;LOC106037937;LOC106040406;LOC106040409
2	GO:0010482	BP	regulation of epidermal cell division	2/ 78	2/ 12028	1	4.15178e-05	0.0825671	gene18522;gene15756	SFN;ANXA8L156
4	GO:0050679	BP	positive regulation of epithelial cell proliferation	4/ 78	33/ 12028	0.121212	5.80495e-05	0.101013	gene14167;gene17154;gene15756;gene645	ESRP2;EGFR;ANXA8L156;FGFBP1
2	GO:0019885	BP	antigen processing and presentation of endogenous peptide antigen via MHC class I	2/ 78	3/ 12028	0.666667	0.000124029	0.156964	gene20335;gene20642	LOC106049856;TAP2
2	GO:0002483	BP	antigen processing and presentation of endogenous peptide antigen	2/ 78	3/ 12028	0.666667	0.000124029	0.156964	gene20335;gene20642	LOC106049856;TAP2
2	GO:0042825	CC	TAP complex	2/ 78	3/ 12028	0.666667	0.000124029	0.156964	gene20335;gene20642	LOC106049856;TAP2
2	GO:0019883	BP	antigen processing and presentation of endogenous antigen	2/ 78	4/ 12028	0.5	0.000247013	0.264513	gene20335;gene20642	LOC106049856;TAP2
2	GO:0022612	BP	gland morphogenesis	2/ 78	4/ 12028	0.5	0.000247013	0.264513	gene17154;gene11327	EGFR;SERPINB5
8	GO:0007155	BP	cell adhesion	8/ 78	270/ 12028	0.0296296	0.00035011	0.317055	gene17714;gene6673;gene9163;gene9162;gene17154;gene16670;gene17323;gene9164	PKP3;DSP;LOC106037566;LOC106037565;EGFR;PKP1;LOC106046592;DSG2
8	GO:0022610	BP	biological adhesion	8/ 78	271/ 12028	0.0295203	0.000358893	0.317055	gene17714;gene6673;gene9163;gene9162;gene17154;gene16670;gene17323;gene9164	PKP3;DSP;LOC106037566;LOC106037565;EGFR;PKP1;LOC106046592;DSG2
2	GO:0060571	BP	morphogenesis of an epithelial fold	2/ 78	5/ 12028	0.4	0.000409955	0.317055	gene17154;gene15756	EGFR;ANXA8L156
2	GO:0015440	MF	ATPase-coupled peptide transmembrane transporter activity	2/ 78	5/ 12028	0.4	0.000409955	0.317055	gene20335;gene20642	LOC106049856;TAP2
2	GO:0033220	MF	ATPase-coupled amide-transporter activity	2/ 78	5/ 12028	0.4	0.000409955	0.317055	gene20335;gene20642	LOC106049856;TAP2
4	GO:0002009	BP	morphogenesis of an epithelium	4/ 78	56/ 12028	0.0714286	0.000465428	0.323961	gene14167;gene17154;gene11327;gene15756	ESRP2;EGFR;SERPINB5;ANXA8L156
5	GO:0005882	CC	intermediate filament	5/ 78	99/ 12028	0.0505051	0.000447944	0.323961	gene19242;gene18600;gene18593;gene18599;gene20066	LOC106048696;LOC106047979;LOC106047978;LOC106048011;LOC106049570
2	GO:0002474	BP	antigen processing and presentation of peptide antigen via MHC class I	2/ 78	7/ 12028	0.285714	0.000853679	0.516698	gene20335;gene20642	LOC106049856;TAP2
2	GO:0033561	BP	regulation of water loss via skin	2/ 78	7/ 12028	0.285714	0.000853679	0.516698	gene18522;gene15756	SFN;ANXA8L156
2	GO:0061436	BP	establishment of skin barrier	2/ 78	7/ 12028	0.285714	0.000853679	0.516698	gene18522;gene15756	SFN;ANXA8L156
4	GO:0048729	BP	tissue morphogenesis	4/ 78	75/ 12028	0.0533333	0.00140351	0.792744	gene14167;gene17154;gene11327;gene15756	ESRP2;EGFR;SERPINB5;ANXA8L156
9	GO:0006629	BP	lipid metabolic process	9/ 78	418/ 12028	0.0215311	0.00148059	0.792744	gene1358;gene18766;gene12296;gene18522;gene1541;gene14542;gene9031;gene7964;gene19078	LOC106042968;CDS1;LOC106041043;SFN;LOC106044856;SPTSSB;GDPD2;SGPP2;LOC106048496
2	GO:0042287	MF	MHC protein binding	2/ 78	9/ 12028	0.222222	0.00145118	0.792744	gene20335;gene20642	LOC106049856;TAP2
4	GO:0006643	BP	membrane lipid metabolic process	4/ 78	77/ 12028	0.0519481	0.00154747	0.797867	gene18522;gene14542;gene7964;gene19078	SFN;SPTSSB;SGPP2;LOC106048496
2	GO:0010837	BP	regulation of keratinocyte proliferation	2/ 78	10/ 12028	0.2	0.00180635	0.895604	gene18522;gene15756	SFN;ANXA8L156
4	GO:0007156	BP	homophilic cell adhesion via plasma membrane adhesion molecules	4/ 78	81/ 12028	0.0493827	0.00186571	0.895604	gene9163;gene9162;gene17323;gene9164	LOC106037566;LOC106037565;LOC106046592;DSG2
2	GO:0050891	BP	multicellular organismal water homeostasis	2/ 78	11/ 12028	0.181818	0.0021985	1	gene18522;gene15756	SFN;ANXA8L156
2	GO:0048002	BP	antigen processing and presentation of peptide antigen	2/ 78	12/ 12028	0.166667	0.00262713	1	gene20335;gene20642	LOC106049856;TAP2
7	GO:0042127	BP	regulation of cell population proliferation	7/ 78	291/ 12028	0.024055	0.00275164	1	gene14167;gene18522;gene645;gene15756;gene7964;gene17154;gene11327	ESRP2;SFN;FGFBP1;ANXA8L156;SGPP2;EGFR;SERPINB5
4	GO:0098742	BP	cell-cell adhesion via plasma-membrane adhesion molecules	4/ 78	94/ 12028	0.0425532	0.00320971	1	gene9163;gene9162;gene17323;gene9164	LOC106037566;LOC106037565;LOC106046592;DSG2
5	GO:0007154	BP	cell communication	5/ 78	155/ 12028	0.0322581	0.00330287	1	gene11716;gene9491;gene9490;gene15756;gene11717	LOC106040406;GJB3;LOC106037937;ANXA8L156;LOC106040409
7	GO:0044255	BP	cellular lipid metabolic process	7/ 78	304/ 12028	0.0230263	0.00350566	1	gene1358;gene18766;gene12296;gene18522;gene14542;gene7964;gene19078	LOC106042968;CDS1;LOC106041043;SFN;SPTSSB;SGPP2;LOC106048496
2	GO:0030104	BP	water homeostasis	2/ 78	14/ 12028	0.142857	0.00359195	1	gene18522;gene15756	SFN;ANXA8L156
2	GO:0045669	BP	positive regulation of osteoblast differentiation	2/ 78	15/ 12028	0.133333	0.00412719	1	gene9031;gene15756	GDPD2;ANXA8L156
2	GO:0045604	BP	regulation of epidermal cell differentiation	2/ 78	15/ 12028	0.133333	0.00412719	1	gene18522;gene15756	SFN;ANXA8L156
3	GO:0035239	BP	tube morphogenesis	3/ 78	50/ 12028	0.06	0.00413082	1	gene14167;gene17154;gene15756	ESRP2;EGFR;ANXA8L156
3	GO:0050878	BP	regulation of body fluid levels	3/ 78	52/ 12028	0.0576923	0.00461477	1	gene18522;gene15756;gene19934	SFN;ANXA8L156;LOC106049424
2	GO:0008630	BP	intrinsic apoptotic signaling pathway in response to DNA damage	2/ 78	16/ 12028	0.125	0.00469704	1	gene18522;gene15756	SFN;ANXA8L156
3	GO:0052548	BP	regulation of endopeptidase activity	3/ 78	55/ 12028	0.0545455	0.00540267	1	gene18522;gene11327;gene15756	SFN;SERPINB5;ANXA8L156
3	GO:0006665	BP	sphingolipid metabolic process	3/ 78	56/ 12028	0.0535714	0.00568214	1	gene14542;gene7964;gene19078	SPTSSB;SGPP2;LOC106048496
3	GO:0052547	BP	regulation of peptidase activity	3/ 78	56/ 12028	0.0535714	0.00568214	1	gene18522;gene11327;gene15756	SFN;SERPINB5;ANXA8L156
2	GO:0045682	BP	regulation of epidermis development	2/ 78	18/ 12028	0.111111	0.00593871	1	gene18522;gene15756	SFN;ANXA8L156
3	GO:0008654	BP	phospholipid biosynthetic process	3/ 78	57/ 12028	0.0526316	0.00597014	1	gene18522;gene18766;gene12296	SFN;CDS1;LOC106041043
1	GO:0007499	BP	ectoderm and mesoderm interaction	1/ 78	1/ 12028	1	0.00648487	1	gene15756	ANXA8L156
1	GO:1904220	BP	regulation of serine C-palmitoyltransferase activity	1/ 78	1/ 12028	1	0.00648487	1	gene14542	SPTSSB
1	GO:0150011	BP	regulation of neuron projection arborization	1/ 78	1/ 12028	1	0.00648487	1	gene12506	MOV10
1	GO:1903800	BP	positive regulation of production of miRNAs involved in gene silencing by miRNA	1/ 78	1/ 12028	1	0.00648487	1	gene17154	EGFR
1	GO:0060512	BP	prostate gland morphogenesis	1/ 78	1/ 12028	1	0.00648487	1	gene11327	SERPINB5
1	GO:0098773	BP	skin epidermis development	1/ 78	1/ 12028	1	0.00648487	1	gene15756	ANXA8L156
1	GO:0010481	BP	epidermal cell division	1/ 78	1/ 12028	1	0.00648487	1	gene15756	ANXA8L156
1	GO:0032608	BP	interferon-beta production	1/ 78	1/ 12028	1	0.00648487	1	gene3889	IRF7
1	GO:0032607	BP	interferon-alpha production	1/ 78	1/ 12028	1	0.00648487	1	gene3889	IRF7
1	GO:0032606	BP	type I interferon production	1/ 78	1/ 12028	1	0.00648487	1	gene3889	IRF7
1	GO:0060337	BP	type I interferon signaling pathway	1/ 78	1/ 12028	1	0.00648487	1	gene3889	IRF7
1	GO:0034124	BP	regulation of MyD88-dependent toll-like receptor signaling pathway	1/ 78	1/ 12028	1	0.00648487	1	gene3889	IRF7
1	GO:0045351	BP	type I interferon biosynthetic process	1/ 78	1/ 12028	1	0.00648487	1	gene3889	IRF7
1	GO:0035279	BP	mRNA cleavage involved in gene silencing by miRNA	1/ 78	1/ 12028	1	0.00648487	1	gene12506	MOV10
1	GO:0098795	BP	mRNA cleavage involved in gene silencing	1/ 78	1/ 12028	1	0.00648487	1	gene12506	MOV10
1	GO:0048807	BP	female genitalia morphogenesis	1/ 78	1/ 12028	1	0.00648487	1	gene15756	ANXA8L156
1	GO:0003165	BP	Purkinje myocyte development	1/ 78	1/ 12028	1	0.00648487	1	gene9164	DSG2
1	GO:2001287	BP	negative regulation of caveolin-mediated endocytosis	1/ 78	1/ 12028	1	0.00648487	1	gene18302	PROM2
1	GO:2001286	BP	regulation of caveolin-mediated endocytosis	1/ 78	1/ 12028	1	0.00648487	1	gene18302	PROM2
1	GO:1905208	BP	negative regulation of cardiocyte differentiation	1/ 78	1/ 12028	1	0.00648487	1	gene17154	EGFR
1	GO:0060529	BP	squamous basal epithelial stem cell differentiation involved in prostate gland acinus development	1/ 78	1/ 12028	1	0.00648487	1	gene15756	ANXA8L156
2	GO:0000079	BP	regulation of cyclin-dependent protein serine/threonine kinase activity	2/ 78	20/ 12028	0.1	0.00731334	1	gene18522;gene17154	SFN;EGFR
2	GO:1904029	BP	regulation of cyclin-dependent protein kinase activity	2/ 78	20/ 12028	0.1	0.00731334	1	gene18522;gene17154	SFN;EGFR
2	GO:0010466	BP	negative regulation of peptidase activity	2/ 78	21/ 12028	0.0952381	0.0080494	1	gene18522;gene11327	SFN;SERPINB5
2	GO:0010951	BP	negative regulation of endopeptidase activity	2/ 78	21/ 12028	0.0952381	0.0080494	1	gene18522;gene11327	SFN;SERPINB5
4	GO:0009888	BP	tissue development	4/ 78	124/ 12028	0.0322581	0.00853527	1	gene6621;gene17154;gene15756;gene9164	EVPL;EGFR;ANXA8L156;DSG2
2	GO:0030856	BP	regulation of epithelial cell differentiation	2/ 78	23/ 12028	0.0869565	0.00961681	1	gene18522;gene15756	SFN;ANXA8L156
2	GO:0006661	BP	phosphatidylinositol biosynthetic process	2/ 78	23/ 12028	0.0869565	0.00961681	1	gene18522;gene18766	SFN;CDS1
2	GO:0030307	BP	positive regulation of cell growth	2/ 78	23/ 12028	0.0869565	0.00961681	1	gene18522;gene17154	SFN;EGFR
2	GO:0045778	BP	positive regulation of ossification	2/ 78	24/ 12028	0.0833333	0.0104473	1	gene9031;gene15756	GDPD2;ANXA8L156
2	GO:0048871	BP	multicellular organismal homeostasis	2/ 78	26/ 12028	0.0769231	0.0121997	1	gene18522;gene15756	SFN;ANXA8L156
1	GO:0010750	BP	positive regulation of nitric oxide mediated signal transduction	1/ 78	2/ 12028	0.5	0.0129282	1	gene17154	EGFR
1	GO:0048550	BP	negative regulation of pinocytosis	1/ 78	2/ 12028	0.5	0.0129282	1	gene18302	PROM2
1	GO:0086073	BP	bundle of His cell-Purkinje myocyte adhesion involved in cell communication	1/ 78	2/ 12028	0.5	0.0129282	1	gene9164	DSG2
1	GO:0010525	BP	regulation of transposition, RNA-mediated	1/ 78	2/ 12028	0.5	0.0129282	1	gene12506	MOV10
1	GO:0010526	BP	negative regulation of transposition, RNA-mediated	1/ 78	2/ 12028	0.5	0.0129282	1	gene12506	MOV10
1	GO:1900020	BP	positive regulation of protein kinase C activity	1/ 78	2/ 12028	0.5	0.0129282	1	gene17154	EGFR
1	GO:0048485	BP	sympathetic nervous system development	1/ 78	2/ 12028	0.5	0.0129282	1	gene15756	ANXA8L156
1	GO:0060601	BP	lateral sprouting from an epithelium	1/ 78	2/ 12028	0.5	0.0129282	1	gene15756	ANXA8L156
1	GO:2000381	BP	negative regulation of mesoderm development	1/ 78	2/ 12028	0.5	0.0129282	1	gene15756	ANXA8L156
1	GO:0060513	BP	prostatic bud formation	1/ 78	2/ 12028	0.5	0.0129282	1	gene15756	ANXA8L156
1	GO:1904674	BP	positive regulation of somatic stem cell population maintenance	1/ 78	2/ 12028	0.5	0.0129282	1	gene15756	ANXA8L156
1	GO:0010749	BP	regulation of nitric oxide mediated signal transduction	1/ 78	2/ 12028	0.5	0.0129282	1	gene17154	EGFR
1	GO:1904888	BP	cranial skeletal system development	1/ 78	2/ 12028	0.5	0.0129282	1	gene15756	ANXA8L156
1	GO:0034127	BP	regulation of MyD88-independent toll-like receptor signaling pathway	1/ 78	2/ 12028	0.5	0.0129282	1	gene3889	IRF7
1	GO:0086042	BP	cardiac muscle cell-cardiac muscle cell adhesion	1/ 78	2/ 12028	0.5	0.0129282	1	gene9164	DSG2
1	GO:0035666	BP	TRIF-dependent toll-like receptor signaling pathway	1/ 78	2/ 12028	0.5	0.0129282	1	gene3889	IRF7
1	GO:0060197	BP	cloacal septation	1/ 78	2/ 12028	0.5	0.0129282	1	gene15756	ANXA8L156
1	GO:1903589	BP	positive regulation of blood vessel endothelial cell proliferation involved in sprouting angiogenesis	1/ 78	2/ 12028	0.5	0.0129282	1	gene645	FGFBP1
1	GO:0016064	BP	immunoglobulin mediated immune response	1/ 78	2/ 12028	0.5	0.0129282	1	gene3889	IRF7
1	GO:1900019	BP	regulation of protein kinase C activity	1/ 78	2/ 12028	0.5	0.0129282	1	gene17154	EGFR
1	GO:0001836	BP	release of cytochrome c from mitochondria	1/ 78	2/ 12028	0.5	0.0129282	1	gene18522	SFN
1	GO:0060445	BP	branching involved in salivary gland morphogenesis	1/ 78	2/ 12028	0.5	0.0129282	1	gene14167	ESRP2
1	GO:2000271	BP	positive regulation of fibroblast apoptotic process	1/ 78	2/ 12028	0.5	0.0129282	1	gene15756	ANXA8L156
1	GO:0090527	BP	actin filament reorganization	1/ 78	2/ 12028	0.5	0.0129282	1	gene9031	GDPD2
1	GO:0007435	BP	salivary gland morphogenesis	1/ 78	2/ 12028	0.5	0.0129282	1	gene17154	EGFR
2	GO:0045667	BP	regulation of osteoblast differentiation	2/ 78	27/ 12028	0.0740741	0.0131208	1	gene9031;gene15756	GDPD2;ANXA8L156
4	GO:0008284	BP	positive regulation of cell population proliferation	4/ 78	141/ 12028	0.0283688	0.0132213	1	gene14167;gene17154;gene15756;gene645	ESRP2;EGFR;ANXA8L156;FGFBP1
4	GO:0006644	BP	phospholipid metabolic process	4/ 78	142/ 12028	0.028169	0.013539	1	gene1358;gene18522;gene18766;gene12296	LOC106042968;SFN;CDS1;LOC106041043
2	GO:0019882	BP	antigen processing and presentation	2/ 78	29/ 12028	0.0689655	0.0150507	1	gene20335;gene20642	LOC106049856;TAP2
2	GO:0097193	BP	intrinsic apoptotic signaling pathway	2/ 78	33/ 12028	0.0606061	0.01925	1	gene18522;gene15756	SFN;ANXA8L156
4	GO:0008610	BP	lipid biosynthetic process	4/ 78	158/ 12028	0.0253165	0.019295	1	gene18522;gene14542;gene12296;gene18766	SFN;SPTSSB;LOC106041043;CDS1
1	GO:0030859	BP	polarized epithelial cell differentiation	1/ 78	3/ 12028	0.333333	0.0193303	1	gene15756	ANXA8L156
1	GO:0060148	BP	positive regulation of posttranscriptional gene silencing	1/ 78	3/ 12028	0.333333	0.0193303	1	gene17154	EGFR
1	GO:0033147	BP	negative regulation of intracellular estrogen receptor signaling pathway	1/ 78	3/ 12028	0.333333	0.0193303	1	gene15756	ANXA8L156
1	GO:0001867	BP	complement activation, lectin pathway	1/ 78	3/ 12028	0.333333	0.0193303	1	gene11570	MASP2
1	GO:2000380	BP	regulation of mesoderm development	1/ 78	3/ 12028	0.333333	0.0193303	1	gene15756	ANXA8L156
1	GO:0035195	BP	gene silencing by miRNA	1/ 78	3/ 12028	0.333333	0.0193303	1	gene12506	MOV10
1	GO:0060572	BP	morphogenesis of an epithelial bud	1/ 78	3/ 12028	0.333333	0.0193303	1	gene15756	ANXA8L156
1	GO:0060742	BP	epithelial cell differentiation involved in prostate gland development	1/ 78	3/ 12028	0.333333	0.0193303	1	gene15756	ANXA8L156
1	GO:0060740	BP	prostate gland epithelium morphogenesis	1/ 78	3/ 12028	0.333333	0.0193303	1	gene15756	ANXA8L156
1	GO:0032488	BP	Cdc42 protein signal transduction	1/ 78	3/ 12028	0.333333	0.0193303	1	gene1394	RHOV
1	GO:1904672	BP	regulation of somatic stem cell population maintenance	1/ 78	3/ 12028	0.333333	0.0193303	1	gene15756	ANXA8L156
1	GO:0042089	BP	cytokine biosynthetic process	1/ 78	3/ 12028	0.333333	0.0193303	1	gene3889	IRF7
1	GO:0002934	BP	desmosome organization	1/ 78	3/ 12028	0.333333	0.0193303	1	gene9164	DSG2
1	GO:2000637	BP	positive regulation of gene silencing by miRNA	1/ 78	3/ 12028	0.333333	0.0193303	1	gene17154	EGFR
1	GO:0048548	BP	regulation of pinocytosis	1/ 78	3/ 12028	0.333333	0.0193303	1	gene18302	PROM2
1	GO:0061469	BP	regulation of type B pancreatic cell proliferation	1/ 78	3/ 12028	0.333333	0.0193303	1	gene7964	SGPP2
1	GO:0010839	BP	negative regulation of keratinocyte proliferation	1/ 78	3/ 12028	0.333333	0.0193303	1	gene18522	SFN
1	GO:0098911	BP	regulation of ventricular cardiac muscle cell action potential	1/ 78	3/ 12028	0.333333	0.0193303	1	gene9164	DSG2
1	GO:1903798	BP	regulation of production of miRNAs involved in gene silencing by miRNA	1/ 78	3/ 12028	0.333333	0.0193303	1	gene17154	EGFR
1	GO:0019724	BP	B cell mediated immunity	1/ 78	3/ 12028	0.333333	0.0193303	1	gene3889	IRF7
1	GO:0010528	BP	regulation of transposition	1/ 78	3/ 12028	0.333333	0.0193303	1	gene12506	MOV10
1	GO:0010529	BP	negative regulation of transposition	1/ 78	3/ 12028	0.333333	0.0193303	1	gene12506	MOV10
1	GO:0061029	BP	eyelid development in camera-type eye	1/ 78	3/ 12028	0.333333	0.0193303	1	gene17154	EGFR
1	GO:0031424	BP	keratinization	1/ 78	3/ 12028	0.333333	0.0193303	1	gene18522	SFN
1	GO:0070920	BP	regulation of production of small RNA involved in gene silencing by RNA	1/ 78	3/ 12028	0.333333	0.0193303	1	gene17154	EGFR
1	GO:0045617	BP	negative regulation of keratinocyte differentiation	1/ 78	3/ 12028	0.333333	0.0193303	1	gene15756	ANXA8L156
2	GO:0051302	BP	regulation of cell division	2/ 78	34/ 12028	0.0588235	0.0203682	1	gene18522;gene15756	SFN;ANXA8L156
3	GO:0006650	BP	glycerophospholipid metabolic process	3/ 78	93/ 12028	0.0322581	0.0224358	1	gene1358;gene18522;gene18766	LOC106042968;SFN;CDS1
4	GO:0051336	BP	regulation of hydrolase activity	4/ 78	168/ 12028	0.0238095	0.0235592	1	gene18522;gene18302;gene11327;gene15756	SFN;PROM2;SERPINB5;ANXA8L156
2	GO:0046467	BP	membrane lipid biosynthetic process	2/ 78	38/ 12028	0.0526316	0.0251032	1	gene18522;gene14542	SFN;SPTSSB
2	GO:0046474	BP	glycerophospholipid biosynthetic process	2/ 78	38/ 12028	0.0526316	0.0251032	1	gene18522;gene18766	SFN;CDS1
1	GO:0003229	BP	ventricular cardiac muscle tissue development	1/ 78	4/ 12028	0.25	0.0256914	1	gene9164	DSG2
1	GO:0034113	BP	heterotypic cell-cell adhesion	1/ 78	4/ 12028	0.25	0.0256914	1	gene9164	DSG2
1	GO:1904031	BP	positive regulation of cyclin-dependent protein kinase activity	1/ 78	4/ 12028	0.25	0.0256914	1	gene17154	EGFR
1	GO:0060340	BP	positive regulation of type I interferon-mediated signaling pathway	1/ 78	4/ 12028	0.25	0.0256914	1	gene3889	IRF7
1	GO:0043589	BP	skin morphogenesis	1/ 78	4/ 12028	0.25	0.0256914	1	gene15756	ANXA8L156
1	GO:1902459	BP	positive regulation of stem cell population maintenance	1/ 78	4/ 12028	0.25	0.0256914	1	gene15756	ANXA8L156
1	GO:2000269	BP	regulation of fibroblast apoptotic process	1/ 78	4/ 12028	0.25	0.0256914	1	gene15756	ANXA8L156
1	GO:0003334	BP	keratinocyte development	1/ 78	4/ 12028	0.25	0.0256914	1	gene18522	SFN
1	GO:0035112	BP	genitalia morphogenesis	1/ 78	4/ 12028	0.25	0.0256914	1	gene15756	ANXA8L156
1	GO:0045606	BP	positive regulation of epidermal cell differentiation	1/ 78	4/ 12028	0.25	0.0256914	1	gene18522	SFN
1	GO:0045605	BP	negative regulation of epidermal cell differentiation	1/ 78	4/ 12028	0.25	0.0256914	1	gene15756	ANXA8L156
1	GO:0006379	BP	mRNA cleavage	1/ 78	4/ 12028	0.25	0.0256914	1	gene12506	MOV10
1	GO:0048546	BP	digestive tract morphogenesis	1/ 78	4/ 12028	0.25	0.0256914	1	gene17154	EGFR
1	GO:0006670	BP	sphingosine metabolic process	1/ 78	4/ 12028	0.25	0.0256914	1	gene7964	SGPP2
1	GO:0045683	BP	negative regulation of epidermis development	1/ 78	4/ 12028	0.25	0.0256914	1	gene15756	ANXA8L156
1	GO:0034109	BP	homotypic cell-cell adhesion	1/ 78	4/ 12028	0.25	0.0256914	1	gene9164	DSG2
1	GO:0010838	BP	positive regulation of keratinocyte proliferation	1/ 78	4/ 12028	0.25	0.0256914	1	gene15756	ANXA8L156
1	GO:1903587	BP	regulation of blood vessel endothelial cell proliferation involved in sprouting angiogenesis	1/ 78	4/ 12028	0.25	0.0256914	1	gene645	FGFBP1
1	GO:0046519	BP	sphingoid metabolic process	1/ 78	4/ 12028	0.25	0.0256914	1	gene7964	SGPP2
1	GO:0060441	BP	epithelial tube branching involved in lung morphogenesis	1/ 78	4/ 12028	0.25	0.0256914	1	gene14167	ESRP2
1	GO:0045737	BP	positive regulation of cyclin-dependent protein serine/threonine kinase activity	1/ 78	4/ 12028	0.25	0.0256914	1	gene17154	EGFR
1	GO:0010259	BP	multicellular organism aging	1/ 78	4/ 12028	0.25	0.0256914	1	gene15756	ANXA8L156
1	GO:0036342	BP	post-anal tail morphogenesis	1/ 78	4/ 12028	0.25	0.0256914	1	gene15756	ANXA8L156
1	GO:0045110	BP	intermediate filament bundle assembly	1/ 78	4/ 12028	0.25	0.0256914	1	gene18599	LOC106048011
1	GO:0042107	BP	cytokine metabolic process	1/ 78	4/ 12028	0.25	0.0256914	1	gene3889	IRF7
1	GO:0030216	BP	keratinocyte differentiation	1/ 78	4/ 12028	0.25	0.0256914	1	gene15756	ANXA8L156
1	GO:1905207	BP	regulation of cardiocyte differentiation	1/ 78	4/ 12028	0.25	0.0256914	1	gene17154	EGFR
2	GO:0045017	BP	glycerolipid biosynthetic process	2/ 78	39/ 12028	0.0512821	0.0263505	1	gene18522;gene18766	SFN;CDS1
2	GO:0002064	BP	epithelial cell development	2/ 78	40/ 12028	0.05	0.0276226	1	gene18522;gene15756	SFN;ANXA8L156
2	GO:0043281	BP	regulation of cysteine-type endopeptidase activity involved in apoptotic process	2/ 78	40/ 12028	0.05	0.0276226	1	gene18522;gene15756	SFN;ANXA8L156
2	GO:0045861	BP	negative regulation of proteolysis	2/ 78	41/ 12028	0.0487805	0.028919	1	gene18522;gene11327	SFN;SERPINB5
2	GO:0043062	BP	extracellular structure organization	2/ 78	42/ 12028	0.047619	0.0302394	1	gene3981;gene11327	COL17A1;SERPINB5
2	GO:0030198	BP	extracellular matrix organization	2/ 78	42/ 12028	0.047619	0.0302394	1	gene3981;gene11327	COL17A1;SERPINB5
3	GO:0046486	BP	glycerolipid metabolic process	3/ 78	105/ 12028	0.0285714	0.0306817	1	gene1358;gene18522;gene18766	LOC106042968;SFN;CDS1
1	GO:0046827	BP	positive regulation of protein export from nucleus	1/ 78	5/ 12028	0.2	0.0320118	1	gene18522	SFN
1	GO:1900087	BP	positive regulation of G1/S transition of mitotic cell cycle	1/ 78	5/ 12028	0.2	0.0320118	1	gene17154	EGFR
1	GO:0001736	BP	establishment of planar polarity	1/ 78	5/ 12028	0.2	0.0320118	1	gene15756	ANXA8L156
1	GO:0035774	BP	positive regulation of insulin secretion involved in cellular response to glucose stimulus	1/ 78	5/ 12028	0.2	0.0320118	1	gene2975	VSNL1
1	GO:0007173	BP	epidermal growth factor receptor signaling pathway	1/ 78	5/ 12028	0.2	0.0320118	1	gene17154	EGFR
1	GO:0035194	BP	post-transcriptional gene silencing by RNA	1/ 78	5/ 12028	0.2	0.0320118	1	gene12506	MOV10
1	GO:0016331	BP	morphogenesis of embryonic epithelium	1/ 78	5/ 12028	0.2	0.0320118	1	gene15756	ANXA8L156
1	GO:0046341	BP	CDP-diacylglycerol metabolic process	1/ 78	5/ 12028	0.2	0.0320118	1	gene18766	CDS1
1	GO:0086004	BP	regulation of cardiac muscle cell contraction	1/ 78	5/ 12028	0.2	0.0320118	1	gene9164	DSG2
1	GO:0016024	BP	CDP-diacylglycerol biosynthetic process	1/ 78	5/ 12028	0.2	0.0320118	1	gene18766	CDS1
1	GO:0002067	BP	glandular epithelial cell differentiation	1/ 78	5/ 12028	0.2	0.0320118	1	gene15756	ANXA8L156
1	GO:0007164	BP	establishment of tissue polarity	1/ 78	5/ 12028	0.2	0.0320118	1	gene15756	ANXA8L156
1	GO:0016441	BP	posttranscriptional gene silencing	1/ 78	5/ 12028	0.2	0.0320118	1	gene12506	MOV10
1	GO:0002756	BP	MyD88-independent toll-like receptor signaling pathway	1/ 78	5/ 12028	0.2	0.0320118	1	gene3889	IRF7
2	GO:2000116	BP	regulation of cysteine-type endopeptidase activity	2/ 78	44/ 12028	0.0454545	0.0329508	1	gene18522;gene15756	SFN;ANXA8L156
4	GO:0051248	BP	negative regulation of protein metabolic process	4/ 78	189/ 12028	0.021164	0.0342594	1	gene18522;gene12506;gene17154;gene11327	SFN;MOV10;EGFR;SERPINB5
2	GO:0043484	BP	regulation of RNA splicing	2/ 78	45/ 12028	0.0444444	0.034341	1	gene14167;gene2726	ESRP2;ESRP1
2	GO:0045927	BP	positive regulation of growth	2/ 78	45/ 12028	0.0444444	0.034341	1	gene18522;gene17154	SFN;EGFR
6	GO:0050790	BP	regulation of catalytic activity	6/ 78	376/ 12028	0.0159574	0.0349884	1	gene18522;gene14542;gene18302;gene15756;gene17154;gene11327	SFN;SPTSSB;PROM2;ANXA8L156;EGFR;SERPINB5
1	GO:0030857	BP	negative regulation of epithelial cell differentiation	1/ 78	6/ 12028	0.166667	0.0382917	1	gene15756	ANXA8L156
1	GO:0030858	BP	positive regulation of epithelial cell differentiation	1/ 78	6/ 12028	0.166667	0.0382917	1	gene18522	SFN
1	GO:1900181	BP	negative regulation of protein localization to nucleus	1/ 78	6/ 12028	0.166667	0.0382917	1	gene11128	TRIM29
1	GO:0048645	BP	animal organ formation	1/ 78	6/ 12028	0.166667	0.0382917	1	gene15756	ANXA8L156
1	GO:0061158	BP	3'-UTR-mediated mRNA destabilization	1/ 78	6/ 12028	0.166667	0.0382917	1	gene12506	MOV10
1	GO:0090050	BP	positive regulation of cell migration involved in sprouting angiogenesis	1/ 78	6/ 12028	0.166667	0.0382917	1	gene645	FGFBP1
1	GO:1902808	BP	positive regulation of cell cycle G1/S phase transition	1/ 78	6/ 12028	0.166667	0.0382917	1	gene17154	EGFR
1	GO:0001961	BP	positive regulation of cytokine-mediated signaling pathway	1/ 78	6/ 12028	0.166667	0.0382917	1	gene3889	IRF7
1	GO:0045743	BP	positive regulation of fibroblast growth factor receptor signaling pathway	1/ 78	6/ 12028	0.166667	0.0382917	1	gene645	FGFBP1
1	GO:0045740	BP	positive regulation of DNA replication	1/ 78	6/ 12028	0.166667	0.0382917	1	gene17154	EGFR
1	GO:1903115	BP	regulation of actin filament-based movement	1/ 78	6/ 12028	0.166667	0.0382917	1	gene9164	DSG2
1	GO:0032647	BP	regulation of interferon-alpha production	1/ 78	6/ 12028	0.166667	0.0382917	1	gene3889	IRF7
1	GO:0038127	BP	ERBB signaling pathway	1/ 78	6/ 12028	0.166667	0.0382917	1	gene17154	EGFR
1	GO:0021795	BP	cerebral cortex cell migration	1/ 78	6/ 12028	0.166667	0.0382917	1	gene17154	EGFR
1	GO:0046475	BP	glycerophospholipid catabolic process	1/ 78	6/ 12028	0.166667	0.0382917	1	gene1358	LOC106042968
1	GO:0070141	BP	response to UV-A	1/ 78	6/ 12028	0.166667	0.0382917	1	gene17154	EGFR
1	GO:0071364	BP	cellular response to epidermal growth factor stimulus	1/ 78	6/ 12028	0.166667	0.0382917	1	gene17154	EGFR
1	GO:0045684	BP	positive regulation of epidermis development	1/ 78	6/ 12028	0.166667	0.0382917	1	gene18522	SFN
1	GO:0071276	BP	cellular response to cadmium ion	1/ 78	6/ 12028	0.166667	0.0382917	1	gene17154	EGFR
1	GO:0032727	BP	positive regulation of interferon-alpha production	1/ 78	6/ 12028	0.166667	0.0382917	1	gene3889	IRF7
1	GO:0009913	BP	epidermal cell differentiation	1/ 78	6/ 12028	0.166667	0.0382917	1	gene15756	ANXA8L156
1	GO:0071392	BP	cellular response to estradiol stimulus	1/ 78	6/ 12028	0.166667	0.0382917	1	gene17154	EGFR
1	GO:0070849	BP	response to epidermal growth factor	1/ 78	6/ 12028	0.166667	0.0382917	1	gene17154	EGFR
3	GO:0009887	BP	animal organ morphogenesis	3/ 78	115/ 12028	0.026087	0.0386121	1	gene11327;gene17154;gene15756	SERPINB5;EGFR;ANXA8L156
2	GO:0030278	BP	regulation of ossification	2/ 78	48/ 12028	0.0416667	0.0386458	1	gene9031;gene15756	GDPD2;ANXA8L156
7	GO:0050793	BP	regulation of developmental process	7/ 78	490/ 12028	0.0142857	0.0392754	1	gene12506;gene1394;gene9031;gene645;gene18522;gene15756;gene17154	MOV10;RHOV;GDPD2;FGFBP1;SFN;ANXA8L156;EGFR
3	GO:0030162	BP	regulation of proteolysis	3/ 78	116/ 12028	0.0258621	0.0394574	1	gene18522;gene11327;gene15756	SFN;SERPINB5;ANXA8L156
3	GO:1903827	BP	regulation of cellular protein localization	3/ 78	116/ 12028	0.0258621	0.0394574	1	gene18522;gene11128;gene17154	SFN;TRIM29;EGFR
3	GO:0097435	BP	supramolecular fiber organization	3/ 78	119/ 12028	0.0252101	0.0420497	1	gene1394;gene9031;gene18599	RHOV;GDPD2;LOC106048011
4	GO:0060341	BP	regulation of cellular localization	4/ 78	203/ 12028	0.0197044	0.0427389	1	gene18522;gene11128;gene17154;gene2975	SFN;TRIM29;EGFR;VSNL1
4	GO:0032880	BP	regulation of protein localization	4/ 78	204/ 12028	0.0196078	0.0433862	1	gene18522;gene11128;gene17154;gene2975	SFN;TRIM29;EGFR;VSNL1
1	GO:0061157	BP	mRNA destabilization	1/ 78	7/ 12028	0.142857	0.0445313	1	gene12506	MOV10
1	GO:0098901	BP	regulation of cardiac muscle cell action potential	1/ 78	7/ 12028	0.142857	0.0445313	1	gene9164	DSG2
1	GO:0000380	BP	alternative mRNA splicing, via spliceosome	1/ 78	7/ 12028	0.142857	0.0445313	1	gene14167	ESRP2
1	GO:2000036	BP	regulation of stem cell population maintenance	1/ 78	7/ 12028	0.142857	0.0445313	1	gene15756	ANXA8L156
1	GO:0045109	BP	intermediate filament organization	1/ 78	7/ 12028	0.142857	0.0445313	1	gene18599	LOC106048011
1	GO:0050779	BP	RNA destabilization	1/ 78	7/ 12028	0.142857	0.0445313	1	gene12506	MOV10
1	GO:0022029	BP	telencephalon cell migration	1/ 78	7/ 12028	0.142857	0.0445313	1	gene17154	EGFR
1	GO:0060338	BP	regulation of type I interferon-mediated signaling pathway	1/ 78	7/ 12028	0.142857	0.0445313	1	gene3889	IRF7
1	GO:0050999	BP	regulation of nitric-oxide synthase activity	1/ 78	7/ 12028	0.142857	0.0445313	1	gene17154	EGFR
1	GO:0048146	BP	positive regulation of fibroblast proliferation	1/ 78	7/ 12028	0.142857	0.0445313	1	gene17154	EGFR
1	GO:0032728	BP	positive regulation of interferon-beta production	1/ 78	7/ 12028	0.142857	0.0445313	1	gene3889	IRF7
2	GO:0051346	BP	negative regulation of hydrolase activity	2/ 78	52/ 12028	0.0384615	0.0446859	1	gene18522;gene11327	SFN;SERPINB5
2	GO:0030855	BP	epithelial cell differentiation	2/ 78	53/ 12028	0.0377358	0.0462473	1	gene15756;gene18599	ANXA8L156;LOC106048011
2	GO:0097190	BP	apoptotic signaling pathway	2/ 78	53/ 12028	0.0377358	0.0462473	1	gene18522;gene15756	SFN;ANXA8L156
6	GO:0099513	CC	polymeric cytoskeletal fiber	6/ 78	222/ 12028	0.027027	0.0031415	1	gene19242;gene9031;gene18593;gene20066;gene18600;gene18599	LOC106048696;GDPD2;LOC106047978;LOC106049570;LOC106047979;LOC106048011
5	GO:0070161	CC	anchoring junction	5/ 78	157/ 12028	0.0318471	0.00348939	1	gene9162;gene3981;gene16670;gene17714;gene9164	LOC106037565;COL17A1;PKP1;PKP3;DSG2
7	GO:0099080	CC	supramolecular complex	7/ 78	319/ 12028	0.0219436	0.00456168	1	gene12506;gene19242;gene9031;gene18593;gene20066;gene18600;gene18599	MOV10;LOC106048696;GDPD2;LOC106047978;LOC106049570;LOC106047979;LOC106048011
6	GO:0099512	CC	supramolecular fiber	6/ 78	242/ 12028	0.0247934	0.00478842	1	gene19242;gene9031;gene18593;gene20066;gene18600;gene18599	LOC106048696;GDPD2;LOC106047978;LOC106049570;LOC106047979;LOC106048011
6	GO:0099081	CC	supramolecular polymer	6/ 78	242/ 12028	0.0247934	0.00478842	1	gene19242;gene9031;gene18593;gene20066;gene18600;gene18599	LOC106048696;GDPD2;LOC106047978;LOC106049570;LOC106047979;LOC106048011
4	GO:0005911	CC	cell-cell junction	4/ 78	112/ 12028	0.0357143	0.00598934	1	gene9162;gene16670;gene17714;gene9164	LOC106037565;PKP1;PKP3;DSG2
1	GO:0097489	CC	multivesicular body, internal vesicle lumen	1/ 78	1/ 12028	1	0.00648487	1	gene17154	EGFR
1	GO:0071914	CC	prominosome	1/ 78	1/ 12028	1	0.00648487	1	gene18302	PROM2
2	GO:0045095	CC	keratin filament	2/ 78	20/ 12028	0.1	0.00731334	1	gene19242;gene18599	LOC106048696;LOC106048011
7	GO:0030054	CC	cell junction	7/ 78	349/ 12028	0.0200573	0.007378	1	gene17714;gene6673;gene9162;gene3981;gene16670;gene8728;gene9164	PKP3;DSP;LOC106037565;COL17A1;PKP1;GRIN1;DSG2
1	GO:0043186	CC	P granule	1/ 78	2/ 12028	0.5	0.0129282	1	gene12506	MOV10
1	GO:0030056	CC	hemidesmosome	1/ 78	2/ 12028	0.5	0.0129282	1	gene3981	COL17A1
1	GO:0001533	CC	cornified envelope	1/ 78	3/ 12028	0.333333	0.0193303	1	gene6621	EVPL
1	GO:0031983	CC	vesicle lumen	1/ 78	3/ 12028	0.333333	0.0193303	1	gene17154	EGFR
1	GO:0017059	CC	serine C-palmitoyltransferase complex	1/ 78	4/ 12028	0.25	0.0256914	1	gene14542	SPTSSB
1	GO:0031211	CC	endoplasmic reticulum palmitoyltransferase complex	1/ 78	4/ 12028	0.25	0.0256914	1	gene14542	SPTSSB
1	GO:1905961	CC	protein-cysteine S-palmitoyltransferase complex	1/ 78	4/ 12028	0.25	0.0256914	1	gene14542	SPTSSB
3	GO:0009986	CC	cell surface	3/ 78	99/ 12028	0.030303	0.0263844	1	gene17154;gene18302;gene645	EGFR;PROM2;FGFBP1
7	GO:0098796	CC	membrane protein complex	7/ 78	460/ 12028	0.0152174	0.0293218	1	gene20335;gene11716;gene11717;gene14542;gene9490;gene9491;gene20642	LOC106049856;LOC106040406;LOC106040409;SPTSSB;LOC106037937;GJB3;TAP2
1	GO:0002178	CC	palmitoyltransferase complex	1/ 78	5/ 12028	0.2	0.0320118	1	gene14542	SPTSSB
9	GO:0005886	CC	plasma membrane	9/ 78	683/ 12028	0.0131772	0.0424153	1	gene1394;gene15833;gene9031;gene9163;gene9162;gene17154;gene6621;gene17323;gene9164	RHOV;ATP8B1;GDPD2;LOC106037566;LOC106037565;EGFR;EVPL;LOC106046592;DSG2
2	GO:1904680	MF	peptide transmembrane transporter activity	2/ 78	13/ 12028	0.153846	0.00309177	1	gene20335;gene20642	LOC106049856;TAP2
22	GO:0046872	MF	metal ion binding	22/ 78	1819/ 12028	0.0120946	0.00363724	1	gene19635;gene19634;gene15756;gene2975;gene1358;gene15178;gene7475;gene18619;gene9163;gene9162;gene9164;gene11570;gene157;gene20737;gene15705;gene15833;gene3227;gene19934;gene11128;gene7723;gene10183;gene17323	S100A16;LOC106049115;ANXA8L156;VSNL1;LOC106042968;PML;LOC106035673;LOC106047988;LOC106037566;LOC106037565;DSG2;MASP2;ANXA8L1;LOC106029605;ANXA8L105;ATP8B1;LOC106031049;LOC106049424;TRIM29;SCGN;LOC106038708;LOC106046592
22	GO:0043169	MF	cation binding	22/ 78	1851/ 12028	0.0118855	0.00392767	1	gene19635;gene19634;gene15756;gene2975;gene1358;gene15178;gene7475;gene18619;gene9163;gene9162;gene9164;gene11570;gene157;gene20737;gene15705;gene15833;gene3227;gene19934;gene11128;gene7723;gene10183;gene17323	S100A16;LOC106049115;ANXA8L156;VSNL1;LOC106042968;PML;LOC106035673;LOC106047988;LOC106037566;LOC106037565;DSG2;MASP2;ANXA8L1;LOC106029605;ANXA8L105;ATP8B1;LOC106031049;LOC106049424;TRIM29;SCGN;LOC106038708;LOC106046592
4	GO:0016747	MF	transferase activity, transferring acyl groups other than amino-acyl groups	4/ 78	110/ 12028	0.0363636	0.00562163	1	gene18522;gene14542;gene12296;gene18619	SFN;SPTSSB;LOC106041043;LOC106047988
1	GO:0004584	MF	obsolete dolichyl-phosphate-mannose-glycolipid alpha-mannosyltransferase activity	1/ 78	1/ 12028	1	0.00648487	1	gene18522	SFN
1	GO:0004865	MF	protein serine/threonine phosphatase inhibitor activity	1/ 78	1/ 12028	1	0.00648487	1	gene6107	LOC106034274
1	GO:0097371	MF	MDM2/MDM4 family protein binding	1/ 78	1/ 12028	1	0.00648487	1	gene15756	ANXA8L156
1	GO:0032574	MF	5'-3' RNA helicase activity	1/ 78	1/ 12028	1	0.00648487	1	gene12506	MOV10
2	GO:0042887	MF	amide transmembrane transporter activity	2/ 78	19/ 12028	0.105263	0.00660963	1	gene20335;gene20642	LOC106049856;TAP2
2	GO:0005544	MF	calcium-dependent phospholipid binding	2/ 78	19/ 12028	0.105263	0.00660963	1	gene1358;gene157	LOC106042968;ANXA8L1
2	GO:0016409	MF	palmitoyltransferase activity	2/ 78	19/ 12028	0.105263	0.00660963	1	gene18522;gene14542	SFN;SPTSSB
2	GO:0002039	MF	p53 binding	2/ 78	21/ 12028	0.0952381	0.0080494	1	gene11128;gene15756	TRIM29;ANXA8L156
7	GO:0005198	MF	structural molecule activity	7/ 78	374/ 12028	0.0187166	0.0105765	1	gene19242;gene18593;gene20066;gene3981;gene18600;gene6621;gene18599	LOC106048696;LOC106047978;LOC106049570;COL17A1;LOC106047979;EVPL;LOC106048011
1	GO:0042392	MF	sphingosine-1-phosphate phosphatase activity	1/ 78	2/ 12028	0.5	0.0129282	1	gene7964	SGPP2
1	GO:0005006	MF	epidermal growth factor-activated receptor activity	1/ 78	2/ 12028	0.5	0.0129282	1	gene17154	EGFR
1	GO:0048408	MF	epidermal growth factor binding	1/ 78	2/ 12028	0.5	0.0129282	1	gene17154	EGFR
4	GO:0016746	MF	transferase activity, transferring acyl groups	4/ 78	146/ 12028	0.0273973	0.0148583	1	gene18522;gene14542;gene12296;gene18619	SFN;SPTSSB;LOC106041043;LOC106047988
5	GO:0016887	MF	ATPase activity	5/ 78	233/ 12028	0.0214592	0.0175695	1	gene12506;gene20335;gene18619;gene20642;gene12051	MOV10;LOC106049856;LOC106047988;TAP2;HELZ2
3	GO:0004252	MF	serine-type endopeptidase activity	3/ 78	87/ 12028	0.0344828	0.0188366	1	gene19933;gene11570;gene19934	LOC106049423;MASP2;LOC106049424
1	GO:0016454	MF	C-palmitoyltransferase activity	1/ 78	3/ 12028	0.333333	0.0193303	1	gene14542	SPTSSB
1	GO:0004758	MF	serine C-palmitoyltransferase activity	1/ 78	3/ 12028	0.333333	0.0193303	1	gene14542	SPTSSB
1	GO:0030235	MF	nitric-oxide synthase regulator activity	1/ 78	3/ 12028	0.333333	0.0193303	1	gene17154	EGFR
1	GO:0004605	MF	phosphatidate cytidylyltransferase activity	1/ 78	3/ 12028	0.333333	0.0193303	1	gene18766	CDS1
2	GO:0003950	MF	NAD+ ADP-ribosyltransferase activity	2/ 78	34/ 12028	0.0588235	0.0203682	1	gene3227;gene20737	LOC106031049;LOC106029605
1	GO:0061778	MF	intracellular chloride channel activity	1/ 78	4/ 12028	0.25	0.0256914	1	gene5948	LOC106034001
1	GO:0047498	MF	calcium-dependent phospholipase A2 activity	1/ 78	4/ 12028	0.25	0.0256914	1	gene1358	LOC106042968
1	GO:0017134	MF	fibroblast growth factor binding	1/ 78	4/ 12028	0.25	0.0256914	1	gene645	FGFBP1
1	GO:0005229	MF	intracellular calcium activated chloride channel activity	1/ 78	4/ 12028	0.25	0.0256914	1	gene5948	LOC106034001
1	GO:0004348	MF	glucosylceramidase activity	1/ 78	4/ 12028	0.25	0.0256914	1	gene19078	LOC106048496
2	GO:0019838	MF	growth factor binding	2/ 78	42/ 12028	0.047619	0.0302394	1	gene17154;gene645	EGFR;FGFBP1
1	GO:0070567	MF	cytidylyltransferase activity	1/ 78	5/ 12028	0.2	0.0320118	1	gene18766	CDS1
1	GO:0071617	MF	lysophospholipid acyltransferase activity	1/ 78	5/ 12028	0.2	0.0320118	1	gene12296	LOC106041043
1	GO:0042171	MF	lysophosphatidic acid acyltransferase activity	1/ 78	5/ 12028	0.2	0.0320118	1	gene12296	LOC106041043
1	GO:0016411	MF	acylglycerol O-acyltransferase activity	1/ 78	5/ 12028	0.2	0.0320118	1	gene12296	LOC106041043
1	GO:0050699	MF	WW domain binding	1/ 78	5/ 12028	0.2	0.0320118	1	gene15756	ANXA8L156
1	GO:0019215	MF	intermediate filament binding	1/ 78	5/ 12028	0.2	0.0320118	1	gene6621	EVPL
1	GO:0003841	MF	1-acylglycerol-3-phosphate O-acyltransferase activity	1/ 78	5/ 12028	0.2	0.0320118	1	gene12296	LOC106041043
3	GO:0008236	MF	serine-type peptidase activity	3/ 78	110/ 12028	0.0272727	0.0345276	1	gene19933;gene11570;gene19934	LOC106049423;MASP2;LOC106049424
3	GO:0017171	MF	serine hydrolase activity	3/ 78	110/ 12028	0.0272727	0.0345276	1	gene19933;gene11570;gene19934	LOC106049423;MASP2;LOC106049424
3	GO:0016825	MF	hydrolase activity, acting on acid phosphorus-nitrogen bonds	3/ 78	110/ 12028	0.0272727	0.0345276	1	gene19933;gene11570;gene19934	LOC106049423;MASP2;LOC106049424
3	GO:0004386	MF	helicase activity	3/ 78	112/ 12028	0.0267857	0.0361329	1	gene12506;gene12051;gene18619	MOV10;HELZ2;LOC106047988
1	GO:0042577	MF	lipid phosphatase activity	1/ 78	6/ 12028	0.166667	0.0382917	1	gene7964	SGPP2
1	GO:0004864	MF	protein phosphatase inhibitor activity	1/ 78	7/ 12028	0.142857	0.0445313	1	gene6107	LOC106034274
1	GO:0016408	MF	C-acyltransferase activity	1/ 78	7/ 12028	0.142857	0.0445313	1	gene14542	SPTSSB

## Sheet: green
Number	GO ID	Term Type	Description	Ratio_in_study	Ratio_in_pop	Rich factor	Pvalue	Padjust	Gene_ids	Gene_names
4	GO:0030057	CC	desmosome	4/ 78	6/ 12028	0.666667	2.43057e-08	0.000338359	gene16670;gene9162;gene17714;gene9164	PKP1;LOC106037565;PKP3;DSG2
7	GO:0050678	BP	regulation of epithelial cell proliferation	7/ 78	57/ 12028	0.122807	7.47316e-08	0.000520169	gene14167;gene18522;gene645;gene15756;gene7964;gene17154;gene11327	ESRP2;SFN;FGFBP1;ANXA8L156;SGPP2;EGFR;SERPINB5
14	GO:0005509	MF	calcium ion binding	14/ 78	435/ 12028	0.0321839	6.54805e-07	0.00303851	gene1358;gene7723;gene11570;gene157;gene7475;gene10183;gene19635;gene19634;gene19934;gene9163;gene9162;gene2975;gene17323;gene9164	LOC106042968;SCGN;MASP2;ANXA8L1;LOC106035673;LOC106038708;S100A16;LOC106049115;LOC106049424;LOC106037566;LOC106037565;VSNL1;LOC106046592;DSG2
8	GO:0098609	BP	cell-cell adhesion	8/ 78	135/ 12028	0.0592593	2.4777e-06	0.00723695	gene17714;gene6673;gene9163;gene9162;gene17154;gene16670;gene17323;gene9164	PKP3;DSP;LOC106037566;LOC106037565;EGFR;PKP1;LOC106046592;DSG2
3	GO:0008544	BP	epidermis development	3/ 78	5/ 12028	0.6	2.59929e-06	0.00723695	gene6621;gene17154;gene15756	EVPL;EGFR;ANXA8L156
4	GO:0005922	CC	connexin complex	4/ 78	19/ 12028	0.210526	5.89068e-06	0.0136674	gene9491;gene9490;gene11716;gene11717	GJB3;LOC106037937;LOC106040406;LOC106040409
2	GO:0010482	BP	regulation of epidermal cell division	2/ 78	2/ 12028	1	4.15178e-05	0.0825671	gene18522;gene15756	SFN;ANXA8L156
4	GO:0050679	BP	positive regulation of epithelial cell proliferation	4/ 78	33/ 12028	0.121212	5.80495e-05	0.101013	gene14167;gene17154;gene15756;gene645	ESRP2;EGFR;ANXA8L156;FGFBP1
2	GO:0019885	BP	antigen processing and presentation of endogenous peptide antigen via MHC class I	2/ 78	3/ 12028	0.666667	0.000124029	0.156964	gene20335;gene20642	LOC106049856;TAP2
2	GO:0002483	BP	antigen processing and presentation of endogenous peptide antigen	2/ 78	3/ 12028	0.666667	0.000124029	0.156964	gene20335;gene20642	LOC106049856;TAP2
2	GO:0042825	CC	TAP complex	2/ 78	3/ 12028	0.666667	0.000124029	0.156964	gene20335;gene20642	LOC106049856;TAP2
2	GO:0019883	BP	antigen processing and presentation of endogenous antigen	2/ 78	4/ 12028	0.5	0.000247013	0.264513	gene20335;gene20642	LOC106049856;TAP2
2	GO:0022612	BP	gland morphogenesis	2/ 78	4/ 12028	0.5	0.000247013	0.264513	gene17154;gene11327	EGFR;SERPINB5
8	GO:0007155	BP	cell adhesion	8/ 78	270/ 12028	0.0296296	0.00035011	0.317055	gene17714;gene6673;gene9163;gene9162;gene17154;gene16670;gene17323;gene9164	PKP3;DSP;LOC106037566;LOC106037565;EGFR;PKP1;LOC106046592;DSG2
8	GO:0022610	BP	biological adhesion	8/ 78	271/ 12028	0.0295203	0.000358893	0.317055	gene17714;gene6673;gene9163;gene9162;gene17154;gene16670;gene17323;gene9164	PKP3;DSP;LOC106037566;LOC106037565;EGFR;PKP1;LOC106046592;DSG2
2	GO:0060571	BP	morphogenesis of an epithelial fold	2/ 78	5/ 12028	0.4	0.000409955	0.317055	gene17154;gene15756	EGFR;ANXA8L156
2	GO:0015440	MF	ATPase-coupled peptide transmembrane transporter activity	2/ 78	5/ 12028	0.4	0.000409955	0.317055	gene20335;gene20642	LOC106049856;TAP2
2	GO:0033220	MF	ATPase-coupled amide-transporter activity	2/ 78	5/ 12028	0.4	0.000409955	0.317055	gene20335;gene20642	LOC106049856;TAP2
4	GO:0002009	BP	morphogenesis of an epithelium	4/ 78	56/ 12028	0.0714286	0.000465428	0.323961	gene14167;gene17154;gene11327;gene15756	ESRP2;EGFR;SERPINB5;ANXA8L156
5	GO:0005882	CC	intermediate filament	5/ 78	99/ 12028	0.0505051	0.000447944	0.323961	gene19242;gene18600;gene18593;gene18599;gene20066	LOC106048696;LOC106047979;LOC106047978;LOC106048011;LOC106049570
2	GO:0002474	BP	antigen processing and presentation of peptide antigen via MHC class I	2/ 78	7/ 12028	0.285714	0.000853679	0.516698	gene20335;gene20642	LOC106049856;TAP2
2	GO:0033561	BP	regulation of water loss via skin	2/ 78	7/ 12028	0.285714	0.000853679	0.516698	gene18522;gene15756	SFN;ANXA8L156
2	GO:0061436	BP	establishment of skin barrier	2/ 78	7/ 12028	0.285714	0.000853679	0.516698	gene18522;gene15756	SFN;ANXA8L156
4	GO:0048729	BP	tissue morphogenesis	4/ 78	75/ 12028	0.0533333	0.00140351	0.792744	gene14167;gene17154;gene11327;gene15756	ESRP2;EGFR;SERPINB5;ANXA8L156
9	GO:0006629	BP	lipid metabolic process	9/ 78	418/ 12028	0.0215311	0.00148059	0.792744	gene1358;gene18766;gene12296;gene18522;gene1541;gene14542;gene9031;gene7964;gene19078	LOC106042968;CDS1;LOC106041043;SFN;LOC106044856;SPTSSB;GDPD2;SGPP2;LOC106048496
2	GO:0042287	MF	MHC protein binding	2/ 78	9/ 12028	0.222222	0.00145118	0.792744	gene20335;gene20642	LOC106049856;TAP2
4	GO:0006643	BP	membrane lipid metabolic process	4/ 78	77/ 12028	0.0519481	0.00154747	0.797867	gene18522;gene14542;gene7964;gene19078	SFN;SPTSSB;SGPP2;LOC106048496
2	GO:0010837	BP	regulation of keratinocyte proliferation	2/ 78	10/ 12028	0.2	0.00180635	0.895604	gene18522;gene15756	SFN;ANXA8L156
4	GO:0007156	BP	homophilic cell adhesion via plasma membrane adhesion molecules	4/ 78	81/ 12028	0.0493827	0.00186571	0.895604	gene9163;gene9162;gene17323;gene9164	LOC106037566;LOC106037565;LOC106046592;DSG2
2	GO:0050891	BP	multicellular organismal water homeostasis	2/ 78	11/ 12028	0.181818	0.0021985	1	gene18522;gene15756	SFN;ANXA8L156
2	GO:0048002	BP	antigen processing and presentation of peptide antigen	2/ 78	12/ 12028	0.166667	0.00262713	1	gene20335;gene20642	LOC106049856;TAP2
7	GO:0042127	BP	regulation of cell population proliferation	7/ 78	291/ 12028	0.024055	0.00275164	1	gene14167;gene18522;gene645;gene15756;gene7964;gene17154;gene11327	ESRP2;SFN;FGFBP1;ANXA8L156;SGPP2;EGFR;SERPINB5
4	GO:0098742	BP	cell-cell adhesion via plasma-membrane adhesion molecules	4/ 78	94/ 12028	0.0425532	0.00320971	1	gene9163;gene9162;gene17323;gene9164	LOC106037566;LOC106037565;LOC106046592;DSG2
5	GO:0007154	BP	cell communication	5/ 78	155/ 12028	0.0322581	0.00330287	1	gene11716;gene9491;gene9490;gene15756;gene11717	LOC106040406;GJB3;LOC106037937;ANXA8L156;LOC106040409
7	GO:0044255	BP	cellular lipid metabolic process	7/ 78	304/ 12028	0.0230263	0.00350566	1	gene1358;gene18766;gene12296;gene18522;gene14542;gene7964;gene19078	LOC106042968;CDS1;LOC106041043;SFN;SPTSSB;SGPP2;LOC106048496
2	GO:0030104	BP	water homeostasis	2/ 78	14/ 12028	0.142857	0.00359195	1	gene18522;gene15756	SFN;ANXA8L156
2	GO:0045669	BP	positive regulation of osteoblast differentiation	2/ 78	15/ 12028	0.133333	0.00412719	1	gene9031;gene15756	GDPD2;ANXA8L156
2	GO:0045604	BP	regulation of epidermal cell differentiation	2/ 78	15/ 12028	0.133333	0.00412719	1	gene18522;gene15756	SFN;ANXA8L156
3	GO:0035239	BP	tube morphogenesis	3/ 78	50/ 12028	0.06	0.00413082	1	gene14167;gene17154;gene15756	ESRP2;EGFR;ANXA8L156
3	GO:0050878	BP	regulation of body fluid levels	3/ 78	52/ 12028	0.0576923	0.00461477	1	gene18522;gene15756;gene19934	SFN;ANXA8L156;LOC106049424
2	GO:0008630	BP	intrinsic apoptotic signaling pathway in response to DNA damage	2/ 78	16/ 12028	0.125	0.00469704	1	gene18522;gene15756	SFN;ANXA8L156
3	GO:0052548	BP	regulation of endopeptidase activity	3/ 78	55/ 12028	0.0545455	0.00540267	1	gene18522;gene11327;gene15756	SFN;SERPINB5;ANXA8L156
3	GO:0006665	BP	sphingolipid metabolic process	3/ 78	56/ 12028	0.0535714	0.00568214	1	gene14542;gene7964;gene19078	SPTSSB;SGPP2;LOC106048496
3	GO:0052547	BP	regulation of peptidase activity	3/ 78	56/ 12028	0.0535714	0.00568214	1	gene18522;gene11327;gene15756	SFN;SERPINB5;ANXA8L156
2	GO:0045682	BP	regulation of epidermis development	2/ 78	18/ 12028	0.111111	0.00593871	1	gene18522;gene15756	SFN;ANXA8L156
3	GO:0008654	BP	phospholipid biosynthetic process	3/ 78	57/ 12028	0.0526316	0.00597014	1	gene18522;gene18766;gene12296	SFN;CDS1;LOC106041043
1	GO:0007499	BP	ectoderm and mesoderm interaction	1/ 78	1/ 12028	1	0.00648487	1	gene15756	ANXA8L156
1	GO:1904220	BP	regulation of serine C-palmitoyltransferase activity	1/ 78	1/ 12028	1	0.00648487	1	gene14542	SPTSSB
1	GO:0150011	BP	regulation of neuron projection arborization	1/ 78	1/ 12028	1	0.00648487	1	gene12506	MOV10
1	GO:1903800	BP	positive regulation of production of miRNAs involved in gene silencing by miRNA	1/ 78	1/ 12028	1	0.00648487	1	gene17154	EGFR
1	GO:0060512	BP	prostate gland morphogenesis	1/ 78	1/ 12028	1	0.00648487	1	gene11327	SERPINB5
1	GO:0098773	BP	skin epidermis development	1/ 78	1/ 12028	1	0.00648487	1	gene15756	ANXA8L156
1	GO:0010481	BP	epidermal cell division	1/ 78	1/ 12028	1	0.00648487	1	gene15756	ANXA8L156
1	GO:0032608	BP	interferon-beta production	1/ 78	1/ 12028	1	0.00648487	1	gene3889	IRF7
1	GO:0032607	BP	interferon-alpha production	1/ 78	1/ 12028	1	0.00648487	1	gene3889	IRF7
1	GO:0032606	BP	type I interferon production	1/ 78	1/ 12028	1	0.00648487	1	gene3889	IRF7
1	GO:0060337	BP	type I interferon signaling pathway	1/ 78	1/ 12028	1	0.00648487	1	gene3889	IRF7
1	GO:0034124	BP	regulation of MyD88-dependent toll-like receptor signaling pathway	1/ 78	1/ 12028	1	0.00648487	1	gene3889	IRF7
1	GO:0045351	BP	type I interferon biosynthetic process	1/ 78	1/ 12028	1	0.00648487	1	gene3889	IRF7
1	GO:0035279	BP	mRNA cleavage involved in gene silencing by miRNA	1/ 78	1/ 12028	1	0.00648487	1	gene12506	MOV10
1	GO:0098795	BP	mRNA cleavage involved in gene silencing	1/ 78	1/ 12028	1	0.00648487	1	gene12506	MOV10
1	GO:0048807	BP	female genitalia morphogenesis	1/ 78	1/ 12028	1	0.00648487	1	gene15756	ANXA8L156
1	GO:0003165	BP	Purkinje myocyte development	1/ 78	1/ 12028	1	0.00648487	1	gene9164	DSG2
1	GO:2001287	BP	negative regulation of caveolin-mediated endocytosis	1/ 78	1/ 12028	1	0.00648487	1	gene18302	PROM2
1	GO:2001286	BP	regulation of caveolin-mediated endocytosis	1/ 78	1/ 12028	1	0.00648487	1	gene18302	PROM2
1	GO:1905208	BP	negative regulation of cardiocyte differentiation	1/ 78	1/ 12028	1	0.00648487	1	gene17154	EGFR
1	GO:0060529	BP	squamous basal epithelial stem cell differentiation involved in prostate gland acinus development	1/ 78	1/ 12028	1	0.00648487	1	gene15756	ANXA8L156
2	GO:0000079	BP	regulation of cyclin-dependent protein serine/threonine kinase activity	2/ 78	20/ 12028	0.1	0.00731334	1	gene18522;gene17154	SFN;EGFR
2	GO:1904029	BP	regulation of cyclin-dependent protein kinase activity	2/ 78	20/ 12028	0.1	0.00731334	1	gene18522;gene17154	SFN;EGFR
2	GO:0010466	BP	negative regulation of peptidase activity	2/ 78	21/ 12028	0.0952381	0.0080494	1	gene18522;gene11327	SFN;SERPINB5
2	GO:0010951	BP	negative regulation of endopeptidase activity	2/ 78	21/ 12028	0.0952381	0.0080494	1	gene18522;gene11327	SFN;SERPINB5
4	GO:0009888	BP	tissue development	4/ 78	124/ 12028	0.0322581	0.00853527	1	gene6621;gene17154;gene15756;gene9164	EVPL;EGFR;ANXA8L156;DSG2
2	GO:0030856	BP	regulation of epithelial cell differentiation	2/ 78	23/ 12028	0.0869565	0.00961681	1	gene18522;gene15756	SFN;ANXA8L156
2	GO:0006661	BP	phosphatidylinositol biosynthetic process	2/ 78	23/ 12028	0.0869565	0.00961681	1	gene18522;gene18766	SFN;CDS1
2	GO:0030307	BP	positive regulation of cell growth	2/ 78	23/ 12028	0.0869565	0.00961681	1	gene18522;gene17154	SFN;EGFR
2	GO:0045778	BP	positive regulation of ossification	2/ 78	24/ 12028	0.0833333	0.0104473	1	gene9031;gene15756	GDPD2;ANXA8L156
2	GO:0048871	BP	multicellular organismal homeostasis	2/ 78	26/ 12028	0.0769231	0.0121997	1	gene18522;gene15756	SFN;ANXA8L156
1	GO:0010750	BP	positive regulation of nitric oxide mediated signal transduction	1/ 78	2/ 12028	0.5	0.0129282	1	gene17154	EGFR
1	GO:0048550	BP	negative regulation of pinocytosis	1/ 78	2/ 12028	0.5	0.0129282	1	gene18302	PROM2
1	GO:0086073	BP	bundle of His cell-Purkinje myocyte adhesion involved in cell communication	1/ 78	2/ 12028	0.5	0.0129282	1	gene9164	DSG2
1	GO:0010525	BP	regulation of transposition, RNA-mediated	1/ 78	2/ 12028	0.5	0.0129282	1	gene12506	MOV10
1	GO:0010526	BP	negative regulation of transposition, RNA-mediated	1/ 78	2/ 12028	0.5	0.0129282	1	gene12506	MOV10
1	GO:1900020	BP	positive regulation of protein kinase C activity	1/ 78	2/ 12028	0.5	0.0129282	1	gene17154	EGFR
1	GO:0048485	BP	sympathetic nervous system development	1/ 78	2/ 12028	0.5	0.0129282	1	gene15756	ANXA8L156
1	GO:0060601	BP	lateral sprouting from an epithelium	1/ 78	2/ 12028	0.5	0.0129282	1	gene15756	ANXA8L156
1	GO:2000381	BP	negative regulation of mesoderm development	1/ 78	2/ 12028	0.5	0.0129282	1	gene15756	ANXA8L156
1	GO:0060513	BP	prostatic bud formation	1/ 78	2/ 12028	0.5	0.0129282	1	gene15756	ANXA8L156
1	GO:1904674	BP	positive regulation of somatic stem cell population maintenance	1/ 78	2/ 12028	0.5	0.0129282	1	gene15756	ANXA8L156
1	GO:0010749	BP	regulation of nitric oxide mediated signal transduction	1/ 78	2/ 12028	0.5	0.0129282	1	gene17154	EGFR
1	GO:1904888	BP	cranial skeletal system development	1/ 78	2/ 12028	0.5	0.0129282	1	gene15756	ANXA8L156
1	GO:0034127	BP	regulation of MyD88-independent toll-like receptor signaling pathway	1/ 78	2/ 12028	0.5	0.0129282	1	gene3889	IRF7
1	GO:0086042	BP	cardiac muscle cell-cardiac muscle cell adhesion	1/ 78	2/ 12028	0.5	0.0129282	1	gene9164	DSG2
1	GO:0035666	BP	TRIF-dependent toll-like receptor signaling pathway	1/ 78	2/ 12028	0.5	0.0129282	1	gene3889	IRF7
1	GO:0060197	BP	cloacal septation	1/ 78	2/ 12028	0.5	0.0129282	1	gene15756	ANXA8L156
1	GO:1903589	BP	positive regulation of blood vessel endothelial cell proliferation involved in sprouting angiogenesis	1/ 78	2/ 12028	0.5	0.0129282	1	gene645	FGFBP1
1	GO:0016064	BP	immunoglobulin mediated immune response	1/ 78	2/ 12028	0.5	0.0129282	1	gene3889	IRF7
1	GO:1900019	BP	regulation of protein kinase C activity	1/ 78	2/ 12028	0.5	0.0129282	1	gene17154	EGFR
1	GO:0001836	BP	release of cytochrome c from mitochondria	1/ 78	2/ 12028	0.5	0.0129282	1	gene18522	SFN
1	GO:0060445	BP	branching involved in salivary gland morphogenesis	1/ 78	2/ 12028	0.5	0.0129282	1	gene14167	ESRP2
1	GO:2000271	BP	positive regulation of fibroblast apoptotic process	1/ 78	2/ 12028	0.5	0.0129282	1	gene15756	ANXA8L156
1	GO:0090527	BP	actin filament reorganization	1/ 78	2/ 12028	0.5	0.0129282	1	gene9031	GDPD2
1	GO:0007435	BP	salivary gland morphogenesis	1/ 78	2/ 12028	0.5	0.0129282	1	gene17154	EGFR
2	GO:0045667	BP	regulation of osteoblast differentiation	2/ 78	27/ 12028	0.0740741	0.0131208	1	gene9031;gene15756	GDPD2;ANXA8L156
4	GO:0008284	BP	positive regulation of cell population proliferation	4/ 78	141/ 12028	0.0283688	0.0132213	1	gene14167;gene17154;gene15756;gene645	ESRP2;EGFR;ANXA8L156;FGFBP1
4	GO:0006644	BP	phospholipid metabolic process	4/ 78	142/ 12028	0.028169	0.013539	1	gene1358;gene18522;gene18766;gene12296	LOC106042968;SFN;CDS1;LOC106041043
2	GO:0019882	BP	antigen processing and presentation	2/ 78	29/ 12028	0.0689655	0.0150507	1	gene20335;gene20642	LOC106049856;TAP2
2	GO:0097193	BP	intrinsic apoptotic signaling pathway	2/ 78	33/ 12028	0.0606061	0.01925	1	gene18522;gene15756	SFN;ANXA8L156
4	GO:0008610	BP	lipid biosynthetic process	4/ 78	158/ 12028	0.0253165	0.019295	1	gene18522;gene14542;gene12296;gene18766	SFN;SPTSSB;LOC106041043;CDS1
1	GO:0030859	BP	polarized epithelial cell differentiation	1/ 78	3/ 12028	0.333333	0.0193303	1	gene15756	ANXA8L156
1	GO:0060148	BP	positive regulation of posttranscriptional gene silencing	1/ 78	3/ 12028	0.333333	0.0193303	1	gene17154	EGFR
1	GO:0033147	BP	negative regulation of intracellular estrogen receptor signaling pathway	1/ 78	3/ 12028	0.333333	0.0193303	1	gene15756	ANXA8L156
1	GO:0001867	BP	complement activation, lectin pathway	1/ 78	3/ 12028	0.333333	0.0193303	1	gene11570	MASP2
1	GO:2000380	BP	regulation of mesoderm development	1/ 78	3/ 12028	0.333333	0.0193303	1	gene15756	ANXA8L156
1	GO:0035195	BP	gene silencing by miRNA	1/ 78	3/ 12028	0.333333	0.0193303	1	gene12506	MOV10
1	GO:0060572	BP	morphogenesis of an epithelial bud	1/ 78	3/ 12028	0.333333	0.0193303	1	gene15756	ANXA8L156
1	GO:0060742	BP	epithelial cell differentiation involved in prostate gland development	1/ 78	3/ 12028	0.333333	0.0193303	1	gene15756	ANXA8L156
1	GO:0060740	BP	prostate gland epithelium morphogenesis	1/ 78	3/ 12028	0.333333	0.0193303	1	gene15756	ANXA8L156
1	GO:0032488	BP	Cdc42 protein signal transduction	1/ 78	3/ 12028	0.333333	0.0193303	1	gene1394	RHOV
1	GO:1904672	BP	regulation of somatic stem cell population maintenance	1/ 78	3/ 12028	0.333333	0.0193303	1	gene15756	ANXA8L156
1	GO:0042089	BP	cytokine biosynthetic process	1/ 78	3/ 12028	0.333333	0.0193303	1	gene3889	IRF7
1	GO:0002934	BP	desmosome organization	1/ 78	3/ 12028	0.333333	0.0193303	1	gene9164	DSG2
1	GO:2000637	BP	positive regulation of gene silencing by miRNA	1/ 78	3/ 12028	0.333333	0.0193303	1	gene17154	EGFR
1	GO:0048548	BP	regulation of pinocytosis	1/ 78	3/ 12028	0.333333	0.0193303	1	gene18302	PROM2
1	GO:0061469	BP	regulation of type B pancreatic cell proliferation	1/ 78	3/ 12028	0.333333	0.0193303	1	gene7964	SGPP2
1	GO:0010839	BP	negative regulation of keratinocyte proliferation	1/ 78	3/ 12028	0.333333	0.0193303	1	gene18522	SFN
1	GO:0098911	BP	regulation of ventricular cardiac muscle cell action potential	1/ 78	3/ 12028	0.333333	0.0193303	1	gene9164	DSG2
1	GO:1903798	BP	regulation of production of miRNAs involved in gene silencing by miRNA	1/ 78	3/ 12028	0.333333	0.0193303	1	gene17154	EGFR
1	GO:0019724	BP	B cell mediated immunity	1/ 78	3/ 12028	0.333333	0.0193303	1	gene3889	IRF7
1	GO:0010528	BP	regulation of transposition	1/ 78	3/ 12028	0.333333	0.0193303	1	gene12506	MOV10
1	GO:0010529	BP	negative regulation of transposition	1/ 78	3/ 12028	0.333333	0.0193303	1	gene12506	MOV10
1	GO:0061029	BP	eyelid development in camera-type eye	1/ 78	3/ 12028	0.333333	0.0193303	1	gene17154	EGFR
1	GO:0031424	BP	keratinization	1/ 78	3/ 12028	0.333333	0.0193303	1	gene18522	SFN
1	GO:0070920	BP	regulation of production of small RNA involved in gene silencing by RNA	1/ 78	3/ 12028	0.333333	0.0193303	1	gene17154	EGFR
1	GO:0045617	BP	negative regulation of keratinocyte differentiation	1/ 78	3/ 12028	0.333333	0.0193303	1	gene15756	ANXA8L156
2	GO:0051302	BP	regulation of cell division	2/ 78	34/ 12028	0.0588235	0.0203682	1	gene18522;gene15756	SFN;ANXA8L156
3	GO:0006650	BP	glycerophospholipid metabolic process	3/ 78	93/ 12028	0.0322581	0.0224358	1	gene1358;gene18522;gene18766	LOC106042968;SFN;CDS1
4	GO:0051336	BP	regulation of hydrolase activity	4/ 78	168/ 12028	0.0238095	0.0235592	1	gene18522;gene18302;gene11327;gene15756	SFN;PROM2;SERPINB5;ANXA8L156
2	GO:0046467	BP	membrane lipid biosynthetic process	2/ 78	38/ 12028	0.0526316	0.0251032	1	gene18522;gene14542	SFN;SPTSSB
2	GO:0046474	BP	glycerophospholipid biosynthetic process	2/ 78	38/ 12028	0.0526316	0.0251032	1	gene18522;gene18766	SFN;CDS1
1	GO:0003229	BP	ventricular cardiac muscle tissue development	1/ 78	4/ 12028	0.25	0.0256914	1	gene9164	DSG2
1	GO:0034113	BP	heterotypic cell-cell adhesion	1/ 78	4/ 12028	0.25	0.0256914	1	gene9164	DSG2
1	GO:1904031	BP	positive regulation of cyclin-dependent protein kinase activity	1/ 78	4/ 12028	0.25	0.0256914	1	gene17154	EGFR
1	GO:0060340	BP	positive regulation of type I interferon-mediated signaling pathway	1/ 78	4/ 12028	0.25	0.0256914	1	gene3889	IRF7
1	GO:0043589	BP	skin morphogenesis	1/ 78	4/ 12028	0.25	0.0256914	1	gene15756	ANXA8L156
1	GO:1902459	BP	positive regulation of stem cell population maintenance	1/ 78	4/ 12028	0.25	0.0256914	1	gene15756	ANXA8L156
1	GO:2000269	BP	regulation of fibroblast apoptotic process	1/ 78	4/ 12028	0.25	0.0256914	1	gene15756	ANXA8L156
1	GO:0003334	BP	keratinocyte development	1/ 78	4/ 12028	0.25	0.0256914	1	gene18522	SFN
1	GO:0035112	BP	genitalia morphogenesis	1/ 78	4/ 12028	0.25	0.0256914	1	gene15756	ANXA8L156
1	GO:0045606	BP	positive regulation of epidermal cell differentiation	1/ 78	4/ 12028	0.25	0.0256914	1	gene18522	SFN
1	GO:0045605	BP	negative regulation of epidermal cell differentiation	1/ 78	4/ 12028	0.25	0.0256914	1	gene15756	ANXA8L156
1	GO:0006379	BP	mRNA cleavage	1/ 78	4/ 12028	0.25	0.0256914	1	gene12506	MOV10
1	GO:0048546	BP	digestive tract morphogenesis	1/ 78	4/ 12028	0.25	0.0256914	1	gene17154	EGFR
1	GO:0006670	BP	sphingosine metabolic process	1/ 78	4/ 12028	0.25	0.0256914	1	gene7964	SGPP2
1	GO:0045683	BP	negative regulation of epidermis development	1/ 78	4/ 12028	0.25	0.0256914	1	gene15756	ANXA8L156
1	GO:0034109	BP	homotypic cell-cell adhesion	1/ 78	4/ 12028	0.25	0.0256914	1	gene9164	DSG2
1	GO:0010838	BP	positive regulation of keratinocyte proliferation	1/ 78	4/ 12028	0.25	0.0256914	1	gene15756	ANXA8L156
1	GO:1903587	BP	regulation of blood vessel endothelial cell proliferation involved in sprouting angiogenesis	1/ 78	4/ 12028	0.25	0.0256914	1	gene645	FGFBP1
1	GO:0046519	BP	sphingoid metabolic process	1/ 78	4/ 12028	0.25	0.0256914	1	gene7964	SGPP2
1	GO:0060441	BP	epithelial tube branching involved in lung morphogenesis	1/ 78	4/ 12028	0.25	0.0256914	1	gene14167	ESRP2
1	GO:0045737	BP	positive regulation of cyclin-dependent protein serine/threonine kinase activity	1/ 78	4/ 12028	0.25	0.0256914	1	gene17154	EGFR
1	GO:0010259	BP	multicellular organism aging	1/ 78	4/ 12028	0.25	0.0256914	1	gene15756	ANXA8L156
1	GO:0036342	BP	post-anal tail morphogenesis	1/ 78	4/ 12028	0.25	0.0256914	1	gene15756	ANXA8L156
1	GO:0045110	BP	intermediate filament bundle assembly	1/ 78	4/ 12028	0.25	0.0256914	1	gene18599	LOC106048011
1	GO:0042107	BP	cytokine metabolic process	1/ 78	4/ 12028	0.25	0.0256914	1	gene3889	IRF7
1	GO:0030216	BP	keratinocyte differentiation	1/ 78	4/ 12028	0.25	0.0256914	1	gene15756	ANXA8L156
1	GO:1905207	BP	regulation of cardiocyte differentiation	1/ 78	4/ 12028	0.25	0.0256914	1	gene17154	EGFR
2	GO:0045017	BP	glycerolipid biosynthetic process	2/ 78	39/ 12028	0.0512821	0.0263505	1	gene18522;gene18766	SFN;CDS1
2	GO:0002064	BP	epithelial cell development	2/ 78	40/ 12028	0.05	0.0276226	1	gene18522;gene15756	SFN;ANXA8L156
2	GO:0043281	BP	regulation of cysteine-type endopeptidase activity involved in apoptotic process	2/ 78	40/ 12028	0.05	0.0276226	1	gene18522;gene15756	SFN;ANXA8L156
2	GO:0045861	BP	negative regulation of proteolysis	2/ 78	41/ 12028	0.0487805	0.028919	1	gene18522;gene11327	SFN;SERPINB5
2	GO:0043062	BP	extracellular structure organization	2/ 78	42/ 12028	0.047619	0.0302394	1	gene3981;gene11327	COL17A1;SERPINB5
2	GO:0030198	BP	extracellular matrix organization	2/ 78	42/ 12028	0.047619	0.0302394	1	gene3981;gene11327	COL17A1;SERPINB5
3	GO:0046486	BP	glycerolipid metabolic process	3/ 78	105/ 12028	0.0285714	0.0306817	1	gene1358;gene18522;gene18766	LOC106042968;SFN;CDS1
1	GO:0046827	BP	positive regulation of protein export from nucleus	1/ 78	5/ 12028	0.2	0.0320118	1	gene18522	SFN
1	GO:1900087	BP	positive regulation of G1/S transition of mitotic cell cycle	1/ 78	5/ 12028	0.2	0.0320118	1	gene17154	EGFR
1	GO:0001736	BP	establishment of planar polarity	1/ 78	5/ 12028	0.2	0.0320118	1	gene15756	ANXA8L156
1	GO:0035774	BP	positive regulation of insulin secretion involved in cellular response to glucose stimulus	1/ 78	5/ 12028	0.2	0.0320118	1	gene2975	VSNL1
1	GO:0007173	BP	epidermal growth factor receptor signaling pathway	1/ 78	5/ 12028	0.2	0.0320118	1	gene17154	EGFR
1	GO:0035194	BP	post-transcriptional gene silencing by RNA	1/ 78	5/ 12028	0.2	0.0320118	1	gene12506	MOV10
1	GO:0016331	BP	morphogenesis of embryonic epithelium	1/ 78	5/ 12028	0.2	0.0320118	1	gene15756	ANXA8L156
1	GO:0046341	BP	CDP-diacylglycerol metabolic process	1/ 78	5/ 12028	0.2	0.0320118	1	gene18766	CDS1
1	GO:0086004	BP	regulation of cardiac muscle cell contraction	1/ 78	5/ 12028	0.2	0.0320118	1	gene9164	DSG2
1	GO:0016024	BP	CDP-diacylglycerol biosynthetic process	1/ 78	5/ 12028	0.2	0.0320118	1	gene18766	CDS1
1	GO:0002067	BP	glandular epithelial cell differentiation	1/ 78	5/ 12028	0.2	0.0320118	1	gene15756	ANXA8L156
1	GO:0007164	BP	establishment of tissue polarity	1/ 78	5/ 12028	0.2	0.0320118	1	gene15756	ANXA8L156
1	GO:0016441	BP	posttranscriptional gene silencing	1/ 78	5/ 12028	0.2	0.0320118	1	gene12506	MOV10
1	GO:0002756	BP	MyD88-independent toll-like receptor signaling pathway	1/ 78	5/ 12028	0.2	0.0320118	1	gene3889	IRF7
2	GO:2000116	BP	regulation of cysteine-type endopeptidase activity	2/ 78	44/ 12028	0.0454545	0.0329508	1	gene18522;gene15756	SFN;ANXA8L156
4	GO:0051248	BP	negative regulation of protein metabolic process	4/ 78	189/ 12028	0.021164	0.0342594	1	gene18522;gene12506;gene17154;gene11327	SFN;MOV10;EGFR;SERPINB5
2	GO:0043484	BP	regulation of RNA splicing	2/ 78	45/ 12028	0.0444444	0.034341	1	gene14167;gene2726	ESRP2;ESRP1
2	GO:0045927	BP	positive regulation of growth	2/ 78	45/ 12028	0.0444444	0.034341	1	gene18522;gene17154	SFN;EGFR
6	GO:0050790	BP	regulation of catalytic activity	6/ 78	376/ 12028	0.0159574	0.0349884	1	gene18522;gene14542;gene18302;gene15756;gene17154;gene11327	SFN;SPTSSB;PROM2;ANXA8L156;EGFR;SERPINB5
1	GO:0030857	BP	negative regulation of epithelial cell differentiation	1/ 78	6/ 12028	0.166667	0.0382917	1	gene15756	ANXA8L156
1	GO:0030858	BP	positive regulation of epithelial cell differentiation	1/ 78	6/ 12028	0.166667	0.0382917	1	gene18522	SFN
1	GO:1900181	BP	negative regulation of protein localization to nucleus	1/ 78	6/ 12028	0.166667	0.0382917	1	gene11128	TRIM29
1	GO:0048645	BP	animal organ formation	1/ 78	6/ 12028	0.166667	0.0382917	1	gene15756	ANXA8L156
1	GO:0061158	BP	3'-UTR-mediated mRNA destabilization	1/ 78	6/ 12028	0.166667	0.0382917	1	gene12506	MOV10
1	GO:0090050	BP	positive regulation of cell migration involved in sprouting angiogenesis	1/ 78	6/ 12028	0.166667	0.0382917	1	gene645	FGFBP1
1	GO:1902808	BP	positive regulation of cell cycle G1/S phase transition	1/ 78	6/ 12028	0.166667	0.0382917	1	gene17154	EGFR
1	GO:0001961	BP	positive regulation of cytokine-mediated signaling pathway	1/ 78	6/ 12028	0.166667	0.0382917	1	gene3889	IRF7
1	GO:0045743	BP	positive regulation of fibroblast growth factor receptor signaling pathway	1/ 78	6/ 12028	0.166667	0.0382917	1	gene645	FGFBP1
1	GO:0045740	BP	positive regulation of DNA replication	1/ 78	6/ 12028	0.166667	0.0382917	1	gene17154	EGFR
1	GO:1903115	BP	regulation of actin filament-based movement	1/ 78	6/ 12028	0.166667	0.0382917	1	gene9164	DSG2
1	GO:0032647	BP	regulation of interferon-alpha production	1/ 78	6/ 12028	0.166667	0.0382917	1	gene3889	IRF7
1	GO:0038127	BP	ERBB signaling pathway	1/ 78	6/ 12028	0.166667	0.0382917	1	gene17154	EGFR
1	GO:0021795	BP	cerebral cortex cell migration	1/ 78	6/ 12028	0.166667	0.0382917	1	gene17154	EGFR
1	GO:0046475	BP	glycerophospholipid catabolic process	1/ 78	6/ 12028	0.166667	0.0382917	1	gene1358	LOC106042968
1	GO:0070141	BP	response to UV-A	1/ 78	6/ 12028	0.166667	0.0382917	1	gene17154	EGFR
1	GO:0071364	BP	cellular response to epidermal growth factor stimulus	1/ 78	6/ 12028	0.166667	0.0382917	1	gene17154	EGFR
1	GO:0045684	BP	positive regulation of epidermis development	1/ 78	6/ 12028	0.166667	0.0382917	1	gene18522	SFN
1	GO:0071276	BP	cellular response to cadmium ion	1/ 78	6/ 12028	0.166667	0.0382917	1	gene17154	EGFR
1	GO:0032727	BP	positive regulation of interferon-alpha production	1/ 78	6/ 12028	0.166667	0.0382917	1	gene3889	IRF7
1	GO:0009913	BP	epidermal cell differentiation	1/ 78	6/ 12028	0.166667	0.0382917	1	gene15756	ANXA8L156
1	GO:0071392	BP	cellular response to estradiol stimulus	1/ 78	6/ 12028	0.166667	0.0382917	1	gene17154	EGFR
1	GO:0070849	BP	response to epidermal growth factor	1/ 78	6/ 12028	0.166667	0.0382917	1	gene17154	EGFR
3	GO:0009887	BP	animal organ morphogenesis	3/ 78	115/ 12028	0.026087	0.0386121	1	gene11327;gene17154;gene15756	SERPINB5;EGFR;ANXA8L156
2	GO:0030278	BP	regulation of ossification	2/ 78	48/ 12028	0.0416667	0.0386458	1	gene9031;gene15756	GDPD2;ANXA8L156
7	GO:0050793	BP	regulation of developmental process	7/ 78	490/ 12028	0.0142857	0.0392754	1	gene12506;gene1394;gene9031;gene645;gene18522;gene15756;gene17154	MOV10;RHOV;GDPD2;FGFBP1;SFN;ANXA8L156;EGFR
3	GO:0030162	BP	regulation of proteolysis	3/ 78	116/ 12028	0.0258621	0.0394574	1	gene18522;gene11327;gene15756	SFN;SERPINB5;ANXA8L156
3	GO:1903827	BP	regulation of cellular protein localization	3/ 78	116/ 12028	0.0258621	0.0394574	1	gene18522;gene11128;gene17154	SFN;TRIM29;EGFR
3	GO:0097435	BP	supramolecular fiber organization	3/ 78	119/ 12028	0.0252101	0.0420497	1	gene1394;gene9031;gene18599	RHOV;GDPD2;LOC106048011
4	GO:0060341	BP	regulation of cellular localization	4/ 78	203/ 12028	0.0197044	0.0427389	1	gene18522;gene11128;gene17154;gene2975	SFN;TRIM29;EGFR;VSNL1
4	GO:0032880	BP	regulation of protein localization	4/ 78	204/ 12028	0.0196078	0.0433862	1	gene18522;gene11128;gene17154;gene2975	SFN;TRIM29;EGFR;VSNL1
1	GO:0061157	BP	mRNA destabilization	1/ 78	7/ 12028	0.142857	0.0445313	1	gene12506	MOV10
1	GO:0098901	BP	regulation of cardiac muscle cell action potential	1/ 78	7/ 12028	0.142857	0.0445313	1	gene9164	DSG2
1	GO:0000380	BP	alternative mRNA splicing, via spliceosome	1/ 78	7/ 12028	0.142857	0.0445313	1	gene14167	ESRP2
1	GO:2000036	BP	regulation of stem cell population maintenance	1/ 78	7/ 12028	0.142857	0.0445313	1	gene15756	ANXA8L156
1	GO:0045109	BP	intermediate filament organization	1/ 78	7/ 12028	0.142857	0.0445313	1	gene18599	LOC106048011
1	GO:0050779	BP	RNA destabilization	1/ 78	7/ 12028	0.142857	0.0445313	1	gene12506	MOV10
1	GO:0022029	BP	telencephalon cell migration	1/ 78	7/ 12028	0.142857	0.0445313	1	gene17154	EGFR
1	GO:0060338	BP	regulation of type I interferon-mediated signaling pathway	1/ 78	7/ 12028	0.142857	0.0445313	1	gene3889	IRF7
1	GO:0050999	BP	regulation of nitric-oxide synthase activity	1/ 78	7/ 12028	0.142857	0.0445313	1	gene17154	EGFR
1	GO:0048146	BP	positive regulation of fibroblast proliferation	1/ 78	7/ 12028	0.142857	0.0445313	1	gene17154	EGFR
1	GO:0032728	BP	positive regulation of interferon-beta production	1/ 78	7/ 12028	0.142857	0.0445313	1	gene3889	IRF7
2	GO:0051346	BP	negative regulation of hydrolase activity	2/ 78	52/ 12028	0.0384615	0.0446859	1	gene18522;gene11327	SFN;SERPINB5
2	GO:0030855	BP	epithelial cell differentiation	2/ 78	53/ 12028	0.0377358	0.0462473	1	gene15756;gene18599	ANXA8L156;LOC106048011
2	GO:0097190	BP	apoptotic signaling pathway	2/ 78	53/ 12028	0.0377358	0.0462473	1	gene18522;gene15756	SFN;ANXA8L156
6	GO:0099513	CC	polymeric cytoskeletal fiber	6/ 78	222/ 12028	0.027027	0.0031415	1	gene19242;gene9031;gene18593;gene20066;gene18600;gene18599	LOC106048696;GDPD2;LOC106047978;LOC106049570;LOC106047979;LOC106048011
5	GO:0070161	CC	anchoring junction	5/ 78	157/ 12028	0.0318471	0.00348939	1	gene9162;gene3981;gene16670;gene17714;gene9164	LOC106037565;COL17A1;PKP1;PKP3;DSG2
7	GO:0099080	CC	supramolecular complex	7/ 78	319/ 12028	0.0219436	0.00456168	1	gene12506;gene19242;gene9031;gene18593;gene20066;gene18600;gene18599	MOV10;LOC106048696;GDPD2;LOC106047978;LOC106049570;LOC106047979;LOC106048011
6	GO:0099512	CC	supramolecular fiber	6/ 78	242/ 12028	0.0247934	0.00478842	1	gene19242;gene9031;gene18593;gene20066;gene18600;gene18599	LOC106048696;GDPD2;LOC106047978;LOC106049570;LOC106047979;LOC106048011
6	GO:0099081	CC	supramolecular polymer	6/ 78	242/ 12028	0.0247934	0.00478842	1	gene19242;gene9031;gene18593;gene20066;gene18600;gene18599	LOC106048696;GDPD2;LOC106047978;LOC106049570;LOC106047979;LOC106048011
4	GO:0005911	CC	cell-cell junction	4/ 78	112/ 12028	0.0357143	0.00598934	1	gene9162;gene16670;gene17714;gene9164	LOC106037565;PKP1;PKP3;DSG2
1	GO:0097489	CC	multivesicular body, internal vesicle lumen	1/ 78	1/ 12028	1	0.00648487	1	gene17154	EGFR
1	GO:0071914	CC	prominosome	1/ 78	1/ 12028	1	0.00648487	1	gene18302	PROM2
2	GO:0045095	CC	keratin filament	2/ 78	20/ 12028	0.1	0.00731334	1	gene19242;gene18599	LOC106048696;LOC106048011
7	GO:0030054	CC	cell junction	7/ 78	349/ 12028	0.0200573	0.007378	1	gene17714;gene6673;gene9162;gene3981;gene16670;gene8728;gene9164	PKP3;DSP;LOC106037565;COL17A1;PKP1;GRIN1;DSG2
1	GO:0043186	CC	P granule	1/ 78	2/ 12028	0.5	0.0129282	1	gene12506	MOV10
1	GO:0030056	CC	hemidesmosome	1/ 78	2/ 12028	0.5	0.0129282	1	gene3981	COL17A1
1	GO:0001533	CC	cornified envelope	1/ 78	3/ 12028	0.333333	0.0193303	1	gene6621	EVPL
1	GO:0031983	CC	vesicle lumen	1/ 78	3/ 12028	0.333333	0.0193303	1	gene17154	EGFR
1	GO:0017059	CC	serine C-palmitoyltransferase complex	1/ 78	4/ 12028	0.25	0.0256914	1	gene14542	SPTSSB
1	GO:0031211	CC	endoplasmic reticulum palmitoyltransferase complex	1/ 78	4/ 12028	0.25	0.0256914	1	gene14542	SPTSSB
1	GO:1905961	CC	protein-cysteine S-palmitoyltransferase complex	1/ 78	4/ 12028	0.25	0.0256914	1	gene14542	SPTSSB
3	GO:0009986	CC	cell surface	3/ 78	99/ 12028	0.030303	0.0263844	1	gene17154;gene18302;gene645	EGFR;PROM2;FGFBP1
7	GO:0098796	CC	membrane protein complex	7/ 78	460/ 12028	0.0152174	0.0293218	1	gene20335;gene11716;gene11717;gene14542;gene9490;gene9491;gene20642	LOC106049856;LOC106040406;LOC106040409;SPTSSB;LOC106037937;GJB3;TAP2
1	GO:0002178	CC	palmitoyltransferase complex	1/ 78	5/ 12028	0.2	0.0320118	1	gene14542	SPTSSB
9	GO:0005886	CC	plasma membrane	9/ 78	683/ 12028	0.0131772	0.0424153	1	gene1394;gene15833;gene9031;gene9163;gene9162;gene17154;gene6621;gene17323;gene9164	RHOV;ATP8B1;GDPD2;LOC106037566;LOC106037565;EGFR;EVPL;LOC106046592;DSG2
2	GO:1904680	MF	peptide transmembrane transporter activity	2/ 78	13/ 12028	0.153846	0.00309177	1	gene20335;gene20642	LOC106049856;TAP2
22	GO:0046872	MF	metal ion binding	22/ 78	1819/ 12028	0.0120946	0.00363724	1	gene19635;gene19634;gene15756;gene2975;gene1358;gene15178;gene7475;gene18619;gene9163;gene9162;gene9164;gene11570;gene157;gene20737;gene15705;gene15833;gene3227;gene19934;gene11128;gene7723;gene10183;gene17323	S100A16;LOC106049115;ANXA8L156;VSNL1;LOC106042968;PML;LOC106035673;LOC106047988;LOC106037566;LOC106037565;DSG2;MASP2;ANXA8L1;LOC106029605;ANXA8L105;ATP8B1;LOC106031049;LOC106049424;TRIM29;SCGN;LOC106038708;LOC106046592
22	GO:0043169	MF	cation binding	22/ 78	1851/ 12028	0.0118855	0.00392767	1	gene19635;gene19634;gene15756;gene2975;gene1358;gene15178;gene7475;gene18619;gene9163;gene9162;gene9164;gene11570;gene157;gene20737;gene15705;gene15833;gene3227;gene19934;gene11128;gene7723;gene10183;gene17323	S100A16;LOC106049115;ANXA8L156;VSNL1;LOC106042968;PML;LOC106035673;LOC106047988;LOC106037566;LOC106037565;DSG2;MASP2;ANXA8L1;LOC106029605;ANXA8L105;ATP8B1;LOC106031049;LOC106049424;TRIM29;SCGN;LOC106038708;LOC106046592
4	GO:0016747	MF	transferase activity, transferring acyl groups other than amino-acyl groups	4/ 78	110/ 12028	0.0363636	0.00562163	1	gene18522;gene14542;gene12296;gene18619	SFN;SPTSSB;LOC106041043;LOC106047988
1	GO:0004584	MF	obsolete dolichyl-phosphate-mannose-glycolipid alpha-mannosyltransferase activity	1/ 78	1/ 12028	1	0.00648487	1	gene18522	SFN
1	GO:0004865	MF	protein serine/threonine phosphatase inhibitor activity	1/ 78	1/ 12028	1	0.00648487	1	gene6107	LOC106034274
1	GO:0097371	MF	MDM2/MDM4 family protein binding	1/ 78	1/ 12028	1	0.00648487	1	gene15756	ANXA8L156
1	GO:0032574	MF	5'-3' RNA helicase activity	1/ 78	1/ 12028	1	0.00648487	1	gene12506	MOV10
2	GO:0042887	MF	amide transmembrane transporter activity	2/ 78	19/ 12028	0.105263	0.00660963	1	gene20335;gene20642	LOC106049856;TAP2
2	GO:0005544	MF	calcium-dependent phospholipid binding	2/ 78	19/ 12028	0.105263	0.00660963	1	gene1358;gene157	LOC106042968;ANXA8L1
2	GO:0016409	MF	palmitoyltransferase activity	2/ 78	19/ 12028	0.105263	0.00660963	1	gene18522;gene14542	SFN;SPTSSB
2	GO:0002039	MF	p53 binding	2/ 78	21/ 12028	0.0952381	0.0080494	1	gene11128;gene15756	TRIM29;ANXA8L156
7	GO:0005198	MF	structural molecule activity	7/ 78	374/ 12028	0.0187166	0.0105765	1	gene19242;gene18593;gene20066;gene3981;gene18600;gene6621;gene18599	LOC106048696;LOC106047978;LOC106049570;COL17A1;LOC106047979;EVPL;LOC106048011
1	GO:0042392	MF	sphingosine-1-phosphate phosphatase activity	1/ 78	2/ 12028	0.5	0.0129282	1	gene7964	SGPP2
1	GO:0005006	MF	epidermal growth factor-activated receptor activity	1/ 78	2/ 12028	0.5	0.0129282	1	gene17154	EGFR
1	GO:0048408	MF	epidermal growth factor binding	1/ 78	2/ 12028	0.5	0.0129282	1	gene17154	EGFR
4	GO:0016746	MF	transferase activity, transferring acyl groups	4/ 78	146/ 12028	0.0273973	0.0148583	1	gene18522;gene14542;gene12296;gene18619	SFN;SPTSSB;LOC106041043;LOC106047988
5	GO:0016887	MF	ATPase activity	5/ 78	233/ 12028	0.0214592	0.0175695	1	gene12506;gene20335;gene18619;gene20642;gene12051	MOV10;LOC106049856;LOC106047988;TAP2;HELZ2
3	GO:0004252	MF	serine-type endopeptidase activity	3/ 78	87/ 12028	0.0344828	0.0188366	1	gene19933;gene11570;gene19934	LOC106049423;MASP2;LOC106049424
1	GO:0016454	MF	C-palmitoyltransferase activity	1/ 78	3/ 12028	0.333333	0.0193303	1	gene14542	SPTSSB
1	GO:0004758	MF	serine C-palmitoyltransferase activity	1/ 78	3/ 12028	0.333333	0.0193303	1	gene14542	SPTSSB
1	GO:0030235	MF	nitric-oxide synthase regulator activity	1/ 78	3/ 12028	0.333333	0.0193303	1	gene17154	EGFR
1	GO:0004605	MF	phosphatidate cytidylyltransferase activity	1/ 78	3/ 12028	0.333333	0.0193303	1	gene18766	CDS1
2	GO:0003950	MF	NAD+ ADP-ribosyltransferase activity	2/ 78	34/ 12028	0.0588235	0.0203682	1	gene3227;gene20737	LOC106031049;LOC106029605
1	GO:0061778	MF	intracellular chloride channel activity	1/ 78	4/ 12028	0.25	0.0256914	1	gene5948	LOC106034001
1	GO:0047498	MF	calcium-dependent phospholipase A2 activity	1/ 78	4/ 12028	0.25	0.0256914	1	gene1358	LOC106042968
1	GO:0017134	MF	fibroblast growth factor binding	1/ 78	4/ 12028	0.25	0.0256914	1	gene645	FGFBP1
1	GO:0005229	MF	intracellular calcium activated chloride channel activity	1/ 78	4/ 12028	0.25	0.0256914	1	gene5948	LOC106034001
1	GO:0004348	MF	glucosylceramidase activity	1/ 78	4/ 12028	0.25	0.0256914	1	gene19078	LOC106048496
2	GO:0019838	MF	growth factor binding	2/ 78	42/ 12028	0.047619	0.0302394	1	gene17154;gene645	EGFR;FGFBP1
1	GO:0070567	MF	cytidylyltransferase activity	1/ 78	5/ 12028	0.2	0.0320118	1	gene18766	CDS1
1	GO:0071617	MF	lysophospholipid acyltransferase activity	1/ 78	5/ 12028	0.2	0.0320118	1	gene12296	LOC106041043
1	GO:0042171	MF	lysophosphatidic acid acyltransferase activity	1/ 78	5/ 12028	0.2	0.0320118	1	gene12296	LOC106041043
1	GO:0016411	MF	acylglycerol O-acyltransferase activity	1/ 78	5/ 12028	0.2	0.0320118	1	gene12296	LOC106041043
1	GO:0050699	MF	WW domain binding	1/ 78	5/ 12028	0.2	0.0320118	1	gene15756	ANXA8L156
1	GO:0019215	MF	intermediate filament binding	1/ 78	5/ 12028	0.2	0.0320118	1	gene6621	EVPL
1	GO:0003841	MF	1-acylglycerol-3-phosphate O-acyltransferase activity	1/ 78	5/ 12028	0.2	0.0320118	1	gene12296	LOC106041043
3	GO:0008236	MF	serine-type peptidase activity	3/ 78	110/ 12028	0.0272727	0.0345276	1	gene19933;gene11570;gene19934	LOC106049423;MASP2;LOC106049424
3	GO:0017171	MF	serine hydrolase activity	3/ 78	110/ 12028	0.0272727	0.0345276	1	gene19933;gene11570;gene19934	LOC106049423;MASP2;LOC106049424
3	GO:0016825	MF	hydrolase activity, acting on acid phosphorus-nitrogen bonds	3/ 78	110/ 12028	0.0272727	0.0345276	1	gene19933;gene11570;gene19934	LOC106049423;MASP2;LOC106049424
3	GO:0004386	MF	helicase activity	3/ 78	112/ 12028	0.0267857	0.0361329	1	gene12506;gene12051;gene18619	MOV10;HELZ2;LOC106047988
1	GO:0042577	MF	lipid phosphatase activity	1/ 78	6/ 12028	0.166667	0.0382917	1	gene7964	SGPP2
1	GO:0004864	MF	protein phosphatase inhibitor activity	1/ 78	7/ 12028	0.142857	0.0445313	1	gene6107	LOC106034274
1	GO:0016408	MF	C-acyltransferase activity	1/ 78	7/ 12028	0.142857	0.0445313	1	gene14542	SPTSSB
