# Supplementary material for: Transcriptome Profiling Unveils Key Genes Regulating the Growth and Development of Yangzhou Goose Knob
Source: Int J Mol Sci. 2024 Apr 10;25(8):4166. doi: 10.3390/ijms25084166 (PMC11050116; doi:10.3390/ijms25084166)
Supplement: Supplementary file 1 [file ijms-25-04166-s001.zip › Table S8.xlsx]

## Sheet: Guide
Table S8. KEGG analysis of key modules in WGCNA
Guide
turquoise	KEGG analysis of Turquoise key modules
yellow	KEGG analysis of yellow key modules
blue	KEGG analysis of blue key modules
brown	KEGG analysis of brown key modules
green	KEGG analysis of green key modules

## Sheet: turquoise
Num	Pathway id	Description	Database	Ratio_in_study	Ratio_in_pop	Pvalue	Padjust	First Category	Second Category	Gene_ids	Gene_names
10	map04064	NF-kappa B signaling pathway	KEGG PATHWAY	10/127	114/11318	5.62715e-07	5.06444e-05	Environmental Information Processing	Signal transduction	gene18968|gene8744|gene3669|gene10080|gene14384|gene19271|gene76|gene7658|gene16004|gene10479	ZAP70;TRAF2;TRAF5;XIAP;BCL2A1;LOC106048725;BLNK;BLNK58;SYK;LYN
9	map04662	B cell receptor signaling pathway	KEGG PATHWAY	9/127	85/11318	4.2576e-07	7.66368e-05	Organismal Systems	Immune system	gene7610|gene14041|gene14042|gene76|gene18727|gene11669|gene16004|gene10479|gene18465	BLNK10;LOC106043005;INPPL1;BLNK;DAPP1;INPP5D;SYK;LYN;PTPN6
8	map04660	T cell receptor signaling pathway	KEGG PATHWAY	8/127	113/11318	3.84796e-05	0.00173158	Organismal Systems	Immune system	gene18968|gene2314|gene19271|gene13131|gene18476|gene2315|gene2313|gene18465	ZAP70;CTLA4;LOC106048725;PTPRC;CD4;LOC106030066;CD28;PTPN6
8	map04666	Fc gamma R-mediated phagocytosis	KEGG PATHWAY	8/127	111/11318	3.38279e-05	0.00202968	Organismal Systems	Immune system	gene7610|gene14041|gene14042|gene14267|gene13131|gene11669|gene16004|gene10479	BLNK10;LOC106043005;INPPL1;LOC106043193;PTPRC;INPP5D;SYK;LYN
5	map05340	Primary immunodeficiency	KEGG PATHWAY	5/127	39/11318	6.97118e-05	0.00250963	Human Diseases	Immune disease	gene18476|gene2315|gene18968|gene76|gene13131	CD4;LOC106030066;ZAP70;BLNK;PTPRC
9	map05170	Human immunodeficiency virus 1 infection	KEGG PATHWAY	9/127	196/11318	0.000355618	0.0106685	Human Diseases	Infectious disease: viral	gene7610|gene20029|gene8744|gene7658|gene19271|gene9741|gene3669|gene9870|gene18476	BLNK10;PTK2B;TRAF2;BLNK58;LOC106048725;ITPR2;TRAF5;LOC106038357;CD4
7	map04514	Cell adhesion molecules (CAMs)	KEGG PATHWAY	7/127	141/11318	0.00103435	0.0232729	Environmental Information Processing	Signaling molecules and interaction	gene1063|gene2314|gene19271|gene13131|gene2313|gene2315|gene18476	CD2;CTLA4;LOC106048725;PTPRC;CD28;LOC106030066;CD4
7	map04621	NOD-like receptor signaling pathway	KEGG PATHWAY	7/127	138/11318	0.000911679	0.0234432	Organismal Systems	Immune system	gene13288|gene8744|gene7658|gene10080|gene15161|gene9741|gene3669	LOC106042157;TRAF2;BLNK58;XIAP;PSTPIP1;ITPR2;TRAF5
7	map04062	Chemokine signaling pathway	KEGG PATHWAY	7/127	163/11318	0.00237977	0.0475954	Organismal Systems	Immune system	gene7610|gene20029|gene14267|gene556|gene9870|gene10479|gene20461	BLNK10;PTK2B;LOC106043193;GRK4;LOC106038357;LYN;ADRBK1
5	map04650	Natural killer cell mediated cytotoxicity	KEGG PATHWAY	5/127	90/11318	0.00337644	0.060776	Organismal Systems	Immune system	gene16004|gene18968|gene7610|gene20029|gene18465	SYK;ZAP70;BLNK10;PTK2B;PTPN6
5	map04070	Phosphatidylinositol signaling system	KEGG PATHWAY	5/127	96/11318	0.00445276	0.0728633	Environmental Information Processing	Signal transduction	gene14041|gene11669|gene1417|gene9741|gene14042	LOC106043005;INPP5D;DGKZ;ITPR2;INPPL1
7	map05169	Epstein-Barr virus infection	KEGG PATHWAY	7/127	200/11318	0.00727377	0.109107	Human Diseases	Infectious disease: viral	gene8744|gene7658|gene76|gene19271|gene3669|gene16004|gene10479	TRAF2;BLNK58;BLNK;LOC106048725;TRAF5;SYK;LYN
4	map04664	Fc epsilon RI signaling pathway	KEGG PATHWAY	4/127	71/11318	0.00823375	0.114006	Organismal Systems	Immune system	gene16004|gene7610|gene10479|gene11669	SYK;BLNK10;LYN;INPP5D
5	map04670	Leukocyte transendothelial migration	KEGG PATHWAY	5/127	120/11318	0.0112323	0.144415	Organismal Systems	Immune system	gene3005|gene7610|gene20029|gene13288|gene12556	TXK;BLNK10;PTK2B;LOC106042157;RASSF5
4	map04658	Th1 and Th2 cell differentiation	KEGG PATHWAY	4/127	87/11318	0.0164577	0.164577	Organismal Systems	Immune system	gene19271|gene11335|gene18968|gene18476	LOC106048725;STAT4;ZAP70;CD4
5	map04217	Necroptosis	KEGG PATHWAY	5/127	131/11318	0.0159238	0.168605	Cellular Processes	Cell growth and death	gene8744|gene11335|gene10080|gene13288|gene3669	TRAF2;STAT4;XIAP;LOC106042157;TRAF5
5	map04110	Cell cycle	KEGG PATHWAY	5/127	130/11318	0.0154511	0.173825	Cellular Processes	Cell growth and death	gene10737|gene17183|gene4700|gene10098|gene5173	MCM6;TFDP1;CDC23;MAD2L1;E2F4
3	map05320	Autoimmune thyroid disease	KEGG PATHWAY	3/127	46/11318	0.0147454	0.176945	Human Diseases	Immune disease	gene19271|gene2313|gene2314	LOC106048725;CD28;CTLA4
3	map05321	Inflammatory bowel disease (IBD)	KEGG PATHWAY	3/127	60/11318	0.0297003	0.213842	Human Diseases	Immune disease	gene19271|gene11335|gene12853	LOC106048725;STAT4;IL18R1
3	map04672	Intestinal immune network for IgA production	KEGG PATHWAY	3/127	54/11318	0.0225899	0.21401	Organismal Systems	Immune system	gene19271|gene2313|gene2315	LOC106048725;CD28;LOC106030066
5	map04210	Apoptosis	KEGG PATHWAY	5/127	146/11318	0.0242039	0.217835	Cellular Processes	Cell growth and death	gene8744|gene11741|gene10080|gene14384|gene9741	TRAF2;LMNB1;XIAP;BCL2A1;ITPR2
4	map04668	TNF signaling pathway	KEGG PATHWAY	4/127	102/11318	0.0276695	0.226386	Environmental Information Processing	Signal transduction	gene8744|gene12853|gene3669|gene7658	TRAF2;IL18R1;TRAF5;BLNK58
4	map04114	Oocyte meiosis	KEGG PATHWAY	4/127	104/11318	0.0294374	0.230379	Cellular Processes	Cell growth and death	gene6125|gene4700|gene9741|gene10098	FBXO5;CDC23;ITPR2;MAD2L1
4	map04380	Osteoclast differentiation	KEGG PATHWAY	4/127	104/11318	0.0294374	0.230379	Organismal Systems	Development and regeneration	gene8744|gene16004|gene76|gene7658	TRAF2;SYK;BLNK;BLNK58
6	map05163	Human cytomegalovirus infection	KEGG PATHWAY	6/127	204/11318	0.0273033	0.234028	Human Diseases	Infectious disease: viral	gene7610|gene20029|gene8744|gene9741|gene3669|gene9870	BLNK10;PTK2B;TRAF2;ITPR2;TRAF5;LOC106038357
5	map05167	Kaposi sarcoma-associated herpesvirus infection	KEGG PATHWAY	5/127	167/11318	0.0398156	0.275647	Human Diseases	Infectious disease: viral	gene8744|gene9870|gene16004|gene10479|gene9741	TRAF2;LOC106038357;SYK;LYN;ITPR2
2	map05332	Graft-versus-host disease	KEGG PATHWAY	2/127	29/11318	0.0416406	0.277604	Human Diseases	Immune disease	gene19271|gene2313	LOC106048725;CD28
3	map05140	Leishmaniasis	KEGG PATHWAY	3/127	70/11318	0.0438622	0.281972	Human Diseases	Infectious disease: parasitic	gene18465|gene13288|gene7658	PTPN6;LOC106042157;BLNK58
3	map05416	Viral myocarditis	KEGG PATHWAY	3/127	77/11318	0.0554414	0.321918	Human Diseases	Cardiovascular disease	gene19271|gene2313|gene7610	LOC106048725;CD28;BLNK10
3	map00562	Inositol phosphate metabolism	KEGG PATHWAY	3/127	76/11318	0.0537058	0.322235	Metabolism	Carbohydrate metabolism	gene11669|gene14041|gene14042	INPP5D;LOC106043005;INPPL1
5	map05203	Viral carcinogenesis	KEGG PATHWAY	5/127	181/11318	0.052992	0.328916	Human Diseases	Cancer: overview	gene8744|gene9870|gene16004|gene10479|gene3669	TRAF2;LOC106038357;SYK;LYN;TRAF5
3	map05323	Rheumatoid arthritis	KEGG PATHWAY	3/127	90/11318	0.0803472	0.401736	Human Diseases	Immune disease	gene19271|gene2313|gene2314	LOC106048725;CD28;CTLA4
5	map05166	Human T-cell leukemia virus 1 infection	KEGG PATHWAY	5/127	203/11318	0.0782691	0.402527	Human Diseases	Infectious disease: viral	gene19271|gene18476|gene4700|gene10080|gene10098	LOC106048725;CD4;CDC23;XIAP;MAD2L1
2	map05330	Allograft rejection	KEGG PATHWAY	2/127	40/11318	0.0739231	0.403217	Human Diseases	Immune disease	gene19271|gene2313	LOC106048725;CD28
2	map04940	Type I diabetes mellitus	KEGG PATHWAY	2/127	40/11318	0.0739231	0.403217	Human Diseases	Endocrine and metabolic disease	gene19271|gene2313	LOC106048725;CD28
3	map04520	Adherens junction	KEGG PATHWAY	3/127	86/11318	0.072234	0.406316	Cellular Processes	Cellular community - eukaryotes	gene7610|gene18465|gene10159	BLNK10;PTPN6;LEF1
2	map03022	Basal transcription factors	KEGG PATHWAY	2/127	47/11318	0.097469	0.461695	Genetic Information Processing	Transcription	gene12122|gene3968	TAF4;TAF5
3	map05222	Small cell lung cancer	KEGG PATHWAY	3/127	97/11318	0.0954437	0.464321	Human Diseases	Cancer: specific types	gene8744|gene10080|gene3669	TRAF2;XIAP;TRAF5
3	map05145	Toxoplasmosis	KEGG PATHWAY	3/127	107/11318	0.118832	0.497438	Human Diseases	Infectious disease: parasitic	gene9870|gene10080|gene7658	LOC106038357;XIAP;BLNK58
3	map04659	Th17 cell differentiation	KEGG PATHWAY	3/127	107/11318	0.118832	0.497438	Organismal Systems	Immune system	gene19271|gene18968|gene18476	LOC106048725;ZAP70;CD4
5	map05130	Pathogenic Escherichia coli infection	KEGG PATHWAY	5/127	231/11318	0.118266	0.506855	Human Diseases	Infectious disease: bacterial	gene8744|gene18970|gene10479|gene18465|gene7658	TRAF2;MYO1F;LYN;PTPN6;BLNK58
5	map04014	Ras signaling pathway	KEGG PATHWAY	5/127	237/11318	0.127904	0.511616	Environmental Information Processing	Signal transduction	gene19271|gene1157|gene18968|gene7610|gene12556	LOC106048725;STK4;ZAP70;BLNK10;RASSF5
5	map05131	Shigellosis	KEGG PATHWAY	5/127	237/11318	0.127904	0.511616	Human Diseases	Infectious disease: bacterial	gene5347|gene8744|gene3669|gene9741|gene7658	SEPT12;TRAF2;TRAF5;ITPR2;BLNK58
1	map00603	Glycosphingolipid biosynthesis - globo and isoglobo series	KEGG PATHWAY	1/127	13/11318	0.136513	0.511925	Metabolism	Glycan biosynthesis and metabolism	gene16269	LOC106045430
1	map00072	Synthesis and degradation of ketone bodies	KEGG PATHWAY	1/127	11/11318	0.116783	0.512707	Metabolism	Lipid metabolism	gene10701	BDH1
4	map05168	Herpes simplex virus 1 infection	KEGG PATHWAY	4/127	175/11318	0.13389	0.512771	Human Diseases	Infectious disease: viral	gene8744|gene16004|gene3669|gene7658	TRAF2;SYK;TRAF5;BLNK58
5	map04144	Endocytosis	KEGG PATHWAY	5/127	244/11318	0.13959	0.51278	Cellular Processes	Transport and catabolism	gene9870|gene19828|gene20461|gene556|gene12033	LOC106038357;LOC106049323;ADRBK1;GRK4;MVB12B
2	map04214	Apoptosis - fly	KEGG PATHWAY	2/127	51/11318	0.11175	0.515771	Cellular Processes	Cell growth and death	gene11741|gene10080	LMNB1;XIAP
1	map00604	Glycosphingolipid biosynthesis - ganglio series	KEGG PATHWAY	1/127	14/11318	0.146214	0.516048	Metabolism	Glycan biosynthesis and metabolism	gene16269	LOC106045430
3	map04071	Sphingolipid signaling pathway	KEGG PATHWAY	3/127	117/11318	0.144109	0.518792	Environmental Information Processing	Signal transduction	gene8744|gene7610|gene16929	TRAF2;BLNK10;SMPD2
2	map04612	Antigen processing and presentation	KEGG PATHWAY	2/127	52/11318	0.115402	0.51931	Organismal Systems	Immune system	gene19271|gene18476	LOC106048725;CD4
4	map05202	Transcriptional misregulation in cancer	KEGG PATHWAY	4/127	188/11318	0.160764	0.53588	Human Diseases	Cancer: overview	gene13916|gene19271|gene15751|gene14384	LOC106042836;LOC106048725;BCL6;BCL2A1
2	map05223	Non-small cell lung cancer	KEGG PATHWAY	2/127	63/11318	0.157335	0.54462	Human Diseases	Cancer: specific types	gene1157|gene12556	STK4;RASSF5
2	map04730	Long-term depression	KEGG PATHWAY	2/127	63/11318	0.157335	0.54462	Organismal Systems	Nervous system	gene10479|gene9741	LYN;ITPR2
1	map00533	Glycosaminoglycan biosynthesis - keratan sulfate	KEGG PATHWAY	1/127	18/11318	0.183946	0.580881	Metabolism	Glycan biosynthesis and metabolism	gene16269	LOC106045430
3	map04611	Platelet activation	KEGG PATHWAY	3/127	131/11318	0.182112	0.58536	Organismal Systems	Immune system	gene16004|gene10479|gene9741	SYK;LYN;ITPR2
2	map05221	Acute myeloid leukemia	KEGG PATHWAY	2/127	69/11318	0.181262	0.593221	Human Diseases	Cancer: specific types	gene10159|gene14384	LEF1;BCL2A1
4	map04060	Cytokine-cytokine receptor interaction	KEGG PATHWAY	4/127	205/11318	0.198573	0.616261	Environmental Information Processing	Signaling molecules and interaction	gene9870|gene18476|gene12853|gene17923	LOC106038357;CD4;IL18R1;TNFRSF9
1	map01523	Antifolate resistance	KEGG PATHWAY	1/127	30/11318	0.287497	0.646869	Human Diseases	Drug resistance: antineoplastic	gene19904	ABCC5
2	map04620	Toll-like receptor signaling pathway	KEGG PATHWAY	2/127	94/11318	0.284559	0.648363	Organismal Systems	Immune system	gene19459|gene7658	IRF5;BLNK58
8	map05200	Pathways in cancer	KEGG PATHWAY	8/127	513/11318	0.218393	0.65518	Human Diseases	Cancer: overview	gene1157|gene7610|gene10159|gene8744|gene10080|gene12556|gene3669|gene11335	STK4;BLNK10;LEF1;TRAF2;XIAP;RASSF5;TRAF5;STAT4
2	map04350	TGF-beta signaling pathway	KEGG PATHWAY	2/127	93/11318	0.280395	0.655469	Environmental Information Processing	Signal transduction	gene17183|gene5173	TFDP1;E2F4
2	map05322	Systemic lupus erythematosus	KEGG PATHWAY	2/127	93/11318	0.280395	0.655469	Human Diseases	Immune disease	gene19271|gene2313	LOC106048725;CD28
4	map05132	Salmonella infection	KEGG PATHWAY	4/127	212/11318	0.214878	0.655561	Human Diseases	Infectious disease: bacterial	gene8744|gene13131|gene10159|gene7658	TRAF2;PTPRC;LEF1;BLNK58
3	map05161	Hepatitis B	KEGG PATHWAY	3/127	162/11318	0.273491	0.656379	Human Diseases	Infectious disease: viral	gene11335|gene20029|gene7658	STAT4;PTK2B;BLNK58
3	map04310	Wnt signaling pathway	KEGG PATHWAY	3/127	145/11318	0.222451	0.656412	Environmental Information Processing	Signal transduction	gene7610|gene16220|gene10159	BLNK10;DKK2;LEF1
1	map00512	Mucin type O-glycan biosynthesis	KEGG PATHWAY	1/127	31/11318	0.295514	0.656697	Metabolism	Glycan biosynthesis and metabolism	gene16269	LOC106045430
2	map04914	Progesterone-mediated oocyte maturation	KEGG PATHWAY	2/127	80/11318	0.226305	0.657013	Organismal Systems	Endocrine system	gene4700|gene10098	CDC23;MAD2L1
3	map04218	Cellular senescence	KEGG PATHWAY	3/127	149/11318	0.234298	0.658963	Cellular Processes	Cell growth and death	gene5173|gene9741|gene12556	E2F4;ITPR2;RASSF5
4	map04015	Rap1 signaling pathway	KEGG PATHWAY	4/127	219/11318	0.231543	0.661552	Environmental Information Processing	Signal transduction	gene19271|gene7610|gene8011|gene12556	LOC106048725;BLNK10;FYB;RASSF5
1	map04341	Hedgehog signaling pathway - fly	KEGG PATHWAY	1/127	29/11318	0.279391	0.661715	Environmental Information Processing	Signal transduction	gene556	GRK4
2	map05210	Colorectal cancer	KEGG PATHWAY	2/127	91/11318	0.272062	0.661772	Human Diseases	Cancer: specific types	gene7610|gene10159	BLNK10;LEF1
2	map04725	Cholinergic synapse	KEGG PATHWAY	2/127	103/11318	0.321889	0.665976	Organismal Systems	Nervous system	gene2598|gene9741	KCNQ5;ITPR2
1	map04392	Hippo signaling pathway - multiple species	KEGG PATHWAY	1/127	32/11318	0.303441	0.666089	Environmental Information Processing	Signal transduction	gene18300	RASSF2
1	map03030	DNA replication	KEGG PATHWAY	1/127	32/11318	0.303441	0.666089	Genetic Information Processing	Replication and repair	gene10737	MCM6
1	map05216	Thyroid cancer	KEGG PATHWAY	1/127	33/11318	0.311279	0.667026	Human Diseases	Cancer: specific types	gene10159	LEF1
1	map04215	Apoptosis - multiple species	KEGG PATHWAY	1/127	34/11318	0.31903	0.667736	Cellular Processes	Cell growth and death	gene10080	XIAP
2	map04912	GnRH signaling pathway	KEGG PATHWAY	2/127	84/11318	0.242906	0.672662	Organismal Systems	Endocrine system	gene20029|gene9741	PTK2B;ITPR2
2	map04625	C-type lectin receptor signaling pathway	KEGG PATHWAY	2/127	102/11318	0.317759	0.672902	Organismal Systems	Immune system	gene16004|gene9741	SYK;ITPR2
1	map04745	Phototransduction - fly	KEGG PATHWAY	1/127	28/11318	0.271192	0.677981	Organismal Systems	Sensory system	gene20461	ADRBK1
1	map05310	Asthma	KEGG PATHWAY	1/127	28/11318	0.271192	0.677981	Human Diseases	Immune disease	gene19271	LOC106048725
1	map04216	Ferroptosis	KEGG PATHWAY	1/127	36/11318	0.334272	0.683739	Cellular Processes	Cell growth and death	gene13288	LOC106042157
2	map04640	Hematopoietic cell lineage	KEGG PATHWAY	2/127	89/11318	0.263727	0.687983	Organismal Systems	Immune system	gene18476|gene1063	CD4;CD2
2	map04657	IL-17 signaling pathway	KEGG PATHWAY	2/127	90/11318	0.267894	0.688871	Organismal Systems	Immune system	gene8744|gene3669	TRAF2;TRAF5
2	map05032	Morphine addiction	KEGG PATHWAY	2/127	90/11318	0.267894	0.688871	Human Diseases	Substance dependence	gene20461|gene556	ADRBK1;GRK4
1	map00650	Butanoate metabolism	KEGG PATHWAY	1/127	27/11318	0.262902	0.706303	Metabolism	Carbohydrate metabolism	gene10701	BDH1
1	map00601	Glycosphingolipid biosynthesis - lacto and neolacto series	KEGG PATHWAY	1/127	27/11318	0.262902	0.706303	Metabolism	Glycan biosynthesis and metabolism	gene8754	FUT7
2	map04724	Glutamatergic synapse	KEGG PATHWAY	2/127	110/11318	0.350604	0.709088	Organismal Systems	Nervous system	gene20461|gene9741	ADRBK1;ITPR2
3	map04072	Phospholipase D signaling pathway	KEGG PATHWAY	3/127	158/11318	0.261339	0.712743	Environmental Information Processing	Signal transduction	gene16004|gene1417|gene20029	SYK;DGKZ;PTK2B
1	map03440	Homologous recombination	KEGG PATHWAY	1/127	41/11318	0.370915	0.733677	Genetic Information Processing	Replication and repair	gene9871	TOPBP1
2	map05231	Choline metabolism in cancer	KEGG PATHWAY	2/127	115/11318	0.370868	0.741737	Human Diseases	Cancer: overview	gene7610|gene1417	BLNK10;DGKZ
4	map04010	MAPK signaling pathway	KEGG PATHWAY	4/127	278/11318	0.379953	0.743386	Environmental Information Processing	Signal transduction	gene8744|gene1157|gene7610|gene7658	TRAF2;STK4;BLNK10;BLNK58
1	map04340	Hedgehog signaling pathway	KEGG PATHWAY	1/127	43/11318	0.385005	0.745171	Environmental Information Processing	Signal transduction	gene20461	ADRBK1
3	map04020	Calcium signaling pathway	KEGG PATHWAY	3/127	200/11318	0.390037	0.746879	Environmental Information Processing	Signal transduction	gene19271|gene20029|gene9741	LOC106048725;PTK2B;ITPR2
1	map00970	Aminoacyl-tRNA biosynthesis	KEGG PATHWAY	1/127	46/11318	0.405555	0.760416	Genetic Information Processing	Translation	gene2015	AARS2
1	map00565	Ether lipid metabolism	KEGG PATHWAY	1/127	46/11318	0.405555	0.760416	Metabolism	Lipid metabolism	gene9713	PLA2G7
1	map04979	Cholesterol metabolism	KEGG PATHWAY	1/127	46/11318	0.405555	0.760416	Organismal Systems	Digestive system	gene19828	LOC106049323
1	map00514	Other types of O-glycan biosynthesis	KEGG PATHWAY	1/127	48/11318	0.418875	0.761592	Metabolism	Glycan biosynthesis and metabolism	gene7614	BLNK14
2	map05162	Measles	KEGG PATHWAY	2/127	123/11318	0.402757	0.763118	Human Diseases	Infectious disease: viral	gene19271|gene2313	LOC106048725;CD28
2	map04630	Jak-STAT signaling pathway	KEGG PATHWAY	2/127	141/11318	0.471529	0.785882	Environmental Information Processing	Signal transduction	gene11335|gene18465	STAT4;PTPN6
1	map02010	ABC transporters	KEGG PATHWAY	1/127	51/11318	0.438302	0.788944	Environmental Information Processing	Membrane transport	gene19904	ABCC5
1	map04330	Notch signaling pathway	KEGG PATHWAY	1/127	52/11318	0.444634	0.792416	Environmental Information Processing	Signal transduction	gene7614	BLNK14
1	map04924	Renin secretion	KEGG PATHWAY	1/127	64/11318	0.515306	0.792778	Organismal Systems	Endocrine system	gene9741	ITPR2
2	map04934	Cushing syndrome	KEGG PATHWAY	2/127	152/11318	0.51119	0.793225	Human Diseases	Endocrine and metabolic disease	gene9741|gene10159	ITPR2;LEF1
2	map04068	FoxO signaling pathway	KEGG PATHWAY	2/127	140/11318	0.46783	0.794428	Environmental Information Processing	Signal transduction	gene1157|gene15751	STK4;BCL6
2	map04120	Ubiquitin mediated proteolysis	KEGG PATHWAY	2/127	140/11318	0.46783	0.794428	Genetic Information Processing	Folding, sorting and degradation	gene4700|gene10080	CDC23;XIAP
2	map04910	Insulin signaling pathway	KEGG PATHWAY	2/127	139/11318	0.464116	0.795627	Organismal Systems	Endocrine system	gene14041|gene14042	LOC106043005;INPPL1
1	map00600	Sphingolipid metabolism	KEGG PATHWAY	1/127	53/11318	0.450894	0.795696	Metabolism	Lipid metabolism	gene16929	SMPD2
4	map05010	Alzheimer disease	KEGG PATHWAY	4/127	308/11318	0.455758	0.79647	Human Diseases	Neurodegenerative disease	gene8744|gene16220|gene13288|gene9741	TRAF2;DKK2;LOC106042157;ITPR2
1	map03018	RNA degradation	KEGG PATHWAY	1/127	67/11318	0.531532	0.797298	Genetic Information Processing	Folding, sorting and degradation	gene4828	CNOT6
1	map04720	Long-term potentiation	KEGG PATHWAY	1/127	61/11318	0.498522	0.801196	Organismal Systems	Nervous system	gene9741	ITPR2
1	map05144	Malaria	KEGG PATHWAY	1/127	55/11318	0.463206	0.801703	Human Diseases	Infectious disease: parasitic	gene19271	LOC106048725
1	map01524	Platinum drug resistance	KEGG PATHWAY	1/127	66/11318	0.526184	0.802653	Human Diseases	Drug resistance: antineoplastic	gene10080	XIAP
1	map05217	Basal cell carcinoma	KEGG PATHWAY	1/127	66/11318	0.526184	0.802653	Human Diseases	Cancer: specific types	gene10159	LEF1
1	map04370	VEGF signaling pathway	KEGG PATHWAY	1/127	62/11318	0.50418	0.803118	Environmental Information Processing	Signal transduction	gene7610	BLNK10
1	map05213	Endometrial cancer	KEGG PATHWAY	1/127	59/11318	0.487014	0.804243	Human Diseases	Cancer: specific types	gene10159	LEF1
1	map04622	RIG-I-like receptor signaling pathway	KEGG PATHWAY	1/127	63/11318	0.509774	0.804906	Organismal Systems	Immune system	gene8744	TRAF2
1	map00240	Pyrimidine metabolism	KEGG PATHWAY	1/127	63/11318	0.509774	0.804906	Metabolism	Nucleotide metabolism	gene14963	DCK
1	map04927	Cortisol synthesis and secretion	KEGG PATHWAY	1/127	60/11318	0.4928	0.806401	Organismal Systems	Endocrine system	gene9741	ITPR2
1	map04918	Thyroid hormone synthesis	KEGG PATHWAY	1/127	60/11318	0.4928	0.806401	Organismal Systems	Endocrine system	gene9741	ITPR2
1	map04971	Gastric acid secretion	KEGG PATHWAY	1/127	70/11318	0.547219	0.814044	Organismal Systems	Digestive system	gene9741	ITPR2
1	map04920	Adipocytokine signaling pathway	KEGG PATHWAY	1/127	73/11318	0.562384	0.829748	Organismal Systems	Endocrine system	gene8744	TRAF2
1	map05212	Pancreatic cancer	KEGG PATHWAY	1/127	74/11318	0.567327	0.830234	Human Diseases	Cancer: specific types	gene7610	BLNK10
1	map05120	Epithelial cell signaling in Helicobacter pylori infection	KEGG PATHWAY	1/127	79/11318	0.59122	0.831403	Human Diseases	Infectious disease: bacterial	gene10479	LYN
1	map04925	Aldosterone synthesis and secretion	KEGG PATHWAY	1/127	82/11318	0.604923	0.837586	Organismal Systems	Endocrine system	gene9741	ITPR2
1	map05150	Staphylococcus aureus infection	KEGG PATHWAY	1/127	76/11318	0.577046	0.837648	Human Diseases	Infectious disease: bacterial	gene19271	LOC106048725
1	map03015	mRNA surveillance pathway	KEGG PATHWAY	1/127	81/11318	0.600407	0.837777	Genetic Information Processing	Translation	gene1262	CSTF1
1	map04391	Hippo signaling pathway - fly	KEGG PATHWAY	1/127	77/11318	0.581824	0.837827	Environmental Information Processing	Signal transduction	gene18300	RASSF2
1	map04013	MAPK signaling pathway - fly	KEGG PATHWAY	1/127	77/11318	0.581824	0.837827	Environmental Information Processing	Signal transduction	gene14075	LOC106042970
1	map04970	Salivary secretion	KEGG PATHWAY	1/127	77/11318	0.581824	0.837827	Organismal Systems	Digestive system	gene9741	ITPR2
1	map04066	HIF-1 signaling pathway	KEGG PATHWAY	1/127	104/11318	0.692411	0.865514	Environmental Information Processing	Signal transduction	gene13288	LOC106042157
1	map04726	Serotonergic synapse	KEGG PATHWAY	1/127	103/11318	0.688888	0.867132	Organismal Systems	Nervous system	gene9741	ITPR2
1	map04540	Gap junction	KEGG PATHWAY	1/127	91/11318	0.643356	0.870707	Cellular Processes	Cellular community - eukaryotes	gene9741	ITPR2
1	map05412	Arrhythmogenic right ventricular cardiomyopathy (ARVC)	KEGG PATHWAY	1/127	90/11318	0.639276	0.87174	Human Diseases	Cardiovascular disease	gene10159	LEF1
1	map05100	Bacterial invasion of epithelial cells	KEGG PATHWAY	1/127	89/11318	0.635149	0.872724	Human Diseases	Infectious disease: bacterial	gene5347	2024-09-12
1	map04928	Parathyroid hormone synthesis, secretion and action	KEGG PATHWAY	1/127	94/11318	0.655324	0.873765	Organismal Systems	Endocrine system	gene9741	ITPR2
1	map04972	Pancreatic secretion	KEGG PATHWAY	1/127	102/11318	0.685325	0.874883	Organismal Systems	Digestive system	gene9741	ITPR2
1	map04933	AGE-RAGE signaling pathway in diabetic complications	KEGG PATHWAY	1/127	102/11318	0.685325	0.874883	Human Diseases	Endocrine and metabolic disease	gene13288	LOC106042157
1	map00561	Glycerolipid metabolism	KEGG PATHWAY	1/127	93/11318	0.651379	0.874987	Metabolism	Lipid metabolism	gene1417	DGKZ
1	map04915	Estrogen signaling pathway	KEGG PATHWAY	1/127	117/11318	0.734765	0.875878	Organismal Systems	Endocrine system	gene9741	ITPR2
1	map05142	Chagas disease (American trypanosomiasis)	KEGG PATHWAY	1/127	116/11318	0.731723	0.878068	Human Diseases	Infectious disease: parasitic	gene19271	LOC106048725
1	map03010	Ribosome	KEGG PATHWAY	1/127	110/11318	0.712733	0.878712	Genetic Information Processing	Translation	gene3660	MRPS10
1	map04022	cGMP-PKG signaling pathway	KEGG PATHWAY	1/127	167/11318	0.850214	0.879532	Environmental Information Processing	Signal transduction	gene9741	ITPR2
1	map04270	Vascular smooth muscle contraction	KEGG PATHWAY	1/127	120/11318	0.743685	0.88068	Organismal Systems	Circulatory system	gene9741	ITPR2
1	map04932	Non-alcoholic fatty liver disease (NAFLD)	KEGG PATHWAY	1/127	139/11318	0.793662	0.881847	Human Diseases	Endocrine and metabolic disease	gene8744	TRAF2
1	map05146	Amoebiasis	KEGG PATHWAY	1/127	114/11318	0.725536	0.882408	Human Diseases	Infectious disease: parasitic	gene19516	LOC106048981
2	map04510	Focal adhesion	KEGG PATHWAY	2/127	220/11318	0.710936	0.882541	Cellular Processes	Cellular community - eukaryotes	gene7610|gene10080	BLNK10;XIAP
1	map04922	Glucagon signaling pathway	KEGG PATHWAY	1/127	97/11318	0.666893	0.882652	Organismal Systems	Endocrine system	gene9741	ITPR2
1	map04916	Melanogenesis	KEGG PATHWAY	1/127	101/11318	0.681721	0.882805	Organismal Systems	Endocrine system	gene10159	LEF1
1	map05215	Prostate cancer	KEGG PATHWAY	1/127	101/11318	0.681721	0.882805	Human Diseases	Cancer: specific types	gene10159	LEF1
1	map04145	Phagosome	KEGG PATHWAY	1/127	158/11318	0.833956	0.883012	Cellular Processes	Transport and catabolism	gene13288	LOC106042157
1	map04141	Protein processing in endoplasmic reticulum	KEGG PATHWAY	1/127	172/11318	0.858553	0.883083	Genetic Information Processing	Folding, sorting and degradation	gene8744	TRAF2
2	map05205	Proteoglycans in cancer	KEGG PATHWAY	2/127	229/11318	0.731575	0.883781	Human Diseases	Cancer: overview	gene9741|gene18465	ITPR2;PTPN6
1	map00564	Glycerophospholipid metabolism	KEGG PATHWAY	1/127	100/11318	0.678077	0.884448	Metabolism	Lipid metabolism	gene1417	DGKZ
1	map04728	Dopaminergic synapse	KEGG PATHWAY	1/127	113/11318	0.722389	0.884558	Organismal Systems	Nervous system	gene9741	ITPR2
1	map05160	Hepatitis C	KEGG PATHWAY	1/127	138/11318	0.791291	0.884674	Human Diseases	Infectious disease: viral	gene8744	TRAF2
1	map04750	Inflammatory mediator regulation of TRP channels	KEGG PATHWAY	1/127	99/11318	0.674391	0.886061	Organismal Systems	Sensory system	gene9741	ITPR2
1	map05164	Influenza A	KEGG PATHWAY	1/127	157/11318	0.832045	0.886202	Human Diseases	Infectious disease: viral	gene6479	KPNA2
1	map00230	Purine metabolism	KEGG PATHWAY	1/127	137/11318	0.788894	0.887505	Metabolism	Nucleotide metabolism	gene14963	DCK
1	map04390	Hippo signaling pathway	KEGG PATHWAY	1/127	166/11318	0.848489	0.887953	Environmental Information Processing	Signal transduction	gene10159	LEF1
1	map05152	Tuberculosis	KEGG PATHWAY	1/127	166/11318	0.848489	0.887953	Human Diseases	Infectious disease: bacterial	gene16004	SYK
1	map04740	Olfactory transduction	KEGG PATHWAY	1/127	156/11318	0.830112	0.889406	Organismal Systems	Sensory system	gene20461	ADRBK1
1	map05206	MicroRNAs in cancer	KEGG PATHWAY	1/127	164/11318	0.844978	0.889451	Human Diseases	Cancer: overview	gene13916	LOC106042836
1	map05225	Hepatocellular carcinoma	KEGG PATHWAY	1/127	154/11318	0.82618	0.890493	Human Diseases	Cancer: specific types	gene10159	LEF1
1	map04921	Oxytocin signaling pathway	KEGG PATHWAY	1/127	152/11318	0.822157	0.891496	Organismal Systems	Endocrine system	gene9741	ITPR2
1	map04152	AMPK signaling pathway	KEGG PATHWAY	1/127	127/11318	0.76336	0.892239	Environmental Information Processing	Signal transduction	gene16744	STRADA
1	map05226	Gastric cancer	KEGG PATHWAY	1/127	150/11318	0.818042	0.892409	Human Diseases	Cancer: specific types	gene10159	LEF1
1	map04142	Lysosome	KEGG PATHWAY	1/127	131/11318	0.773922	0.892986	Cellular Processes	Transport and catabolism	gene4152	LAMP3
1	map04140	Autophagy - animal	KEGG PATHWAY	1/127	126/11318	0.760644	0.894875	Cellular Processes	Transport and catabolism	gene10067	LOC106038552
1	map05224	Breast cancer	KEGG PATHWAY	1/127	149/11318	0.815949	0.895554	Human Diseases	Cancer: specific types	gene10159	LEF1
1	map04371	Apelin signaling pathway	KEGG PATHWAY	1/127	130/11318	0.771326	0.895733	Environmental Information Processing	Signal transduction	gene9741	ITPR2
1	map04723	Retrograde endocannabinoid signaling	KEGG PATHWAY	1/127	136/11318	0.786468	0.895977	Organismal Systems	Nervous system	gene9741	ITPR2
1	map05418	Fluid shear stress and atherosclerosis	KEGG PATHWAY	1/127	136/11318	0.786468	0.895977	Human Diseases	Cardiovascular disease	gene7610	BLNK10
1	map04150	mTOR signaling pathway	KEGG PATHWAY	1/127	148/11318	0.813833	0.898711	Environmental Information Processing	Signal transduction	gene16744	STRADA
2	map05016	Huntington disease	KEGG PATHWAY	2/127	255/11318	0.78433	0.899232	Human Diseases	Neurodegenerative disease	gene8744|gene12122	TRAF2;TAF4
1	map04360	Axon guidance	KEGG PATHWAY	1/127	187/11318	0.880905	0.900926	Organismal Systems	Development and regeneration	gene7610	BLNK10
1	map04810	Regulation of actin cytoskeleton	KEGG PATHWAY	1/127	216/11318	0.914653	0.92493	Cellular Processes	Cell motility	gene7610	BLNK10
1	map04024	cAMP signaling pathway	KEGG PATHWAY	1/127	215/11318	0.913666	0.929152	Environmental Information Processing	Signal transduction	gene7610	BLNK10
1	map04151	PI3K-Akt signaling pathway	KEGG PATHWAY	1/127	339/11318	0.979433	0.979433	Environmental Information Processing	Signal transduction	gene16004	SYK
1	map05165	Human papillomavirus infection	KEGG PATHWAY	1/127	321/11318	0.974646	0.980091	Human Diseases	Infectious disease: viral	gene7614	BLNK14

## Sheet: yellow
Num	Pathway id	Description	Database	Ratio_in_study	Ratio_in_pop	Pvalue	Padjust	First Category	Second Category	Gene_ids	Gene_names
4	map04726	Serotonergic synapse	KEGG PATHWAY	4/52	103/11318	0.00125253	0.140283	Organismal Systems	Nervous system	gene15729|gene7410|gene13852|gene6855	HTR2B;HTR1A;DUSP1;HTR2A
4	map05418	Fluid shear stress and atherosclerosis	KEGG PATHWAY	4/52	136/11318	0.00345594	0.193533	Human Diseases	Cardiovascular disease	gene12814|gene15871|gene12205|gene13852	LOC106041602;KLF2;SDC4;DUSP1
4	map05202	Transcriptional misregulation in cancer	KEGG PATHWAY	4/52	188/11318	0.0107304	0.240361	Human Diseases	Cancer: overview	gene968|gene9948|gene18813|gene7713	NFKBIZ;MYC;GADD45B;NR4A3
2	map05216	Thyroid cancer	KEGG PATHWAY	2/52	33/11318	0.00998097	0.279467	Human Diseases	Cancer: specific types	gene9948|gene18813	MYC;GADD45B
3	map04218	Cellular senescence	KEGG PATHWAY	3/52	149/11318	0.0309064	0.28846	Cellular Processes	Cell growth and death	gene9948|gene7841|gene18813	MYC;ETS2;GADD45B
1	map00524	Neomycin, kanamycin and gentamicin biosynthesis	KEGG PATHWAY	1/52	4/11318	0.0182539	0.292063	Metabolism	Biosynthesis of other secondary metabolites	gene19453	GCK
2	map04930	Type II diabetes mellitus	KEGG PATHWAY	2/52	42/11318	0.0158539	0.295939	Human Diseases	Endocrine and metabolic disease	gene17471|gene19453	SOCS3;GCK
2	map05213	Endometrial cancer	KEGG PATHWAY	2/52	59/11318	0.0299867	0.305319	Human Diseases	Cancer: specific types	gene9948|gene18813	MYC;GADD45B
3	map05210	Colorectal cancer	KEGG PATHWAY	3/52	91/11318	0.00836318	0.312225	Human Diseases	Cancer: specific types	gene13078|gene18813|gene9948	AREG;GADD45B;MYC
2	map04750	Inflammatory mediator regulation of TRP channels	KEGG PATHWAY	2/52	99/11318	0.0757706	0.314308	Organismal Systems	Sensory system	gene15729|gene6855	HTR2B;HTR2A
2	map04380	Osteoclast differentiation	KEGG PATHWAY	2/52	104/11318	0.0824721	0.318513	Organismal Systems	Development and regeneration	gene17471|gene2053	SOCS3;FOSL2
2	map04668	TNF signaling pathway	KEGG PATHWAY	2/52	102/11318	0.0797697	0.319079	Environmental Information Processing	Signal transduction	gene17471|gene12814	SOCS3;LOC106041602
2	map04512	ECM-receptor interaction	KEGG PATHWAY	2/52	98/11318	0.0744525	0.320719	Environmental Information Processing	Signaling molecules and interaction	gene1497|gene12205	LOC106044451;SDC4
3	map04390	Hippo signaling pathway	KEGG PATHWAY	3/52	166/11318	0.0405797	0.324638	Environmental Information Processing	Signal transduction	gene13078|gene14962|gene9948	AREG;MOB1B;MYC
2	map05230	Central carbon metabolism in cancer	KEGG PATHWAY	2/52	58/11318	0.0290542	0.325408	Human Diseases	Cancer: overview	gene9948|gene19453	MYC;GCK
2	map05222	Small cell lung cancer	KEGG PATHWAY	2/52	97/11318	0.073142	0.327676	Human Diseases	Cancer: specific types	gene9948|gene18813	MYC;GADD45B
3	map05205	Proteoglycans in cancer	KEGG PATHWAY	3/52	229/11318	0.087818	0.327854	Human Diseases	Cancer: overview	gene9948|gene12205|gene1497	MYC;SDC4;LOC106044451
3	map04068	FoxO signaling pathway	KEGG PATHWAY	3/52	140/11318	0.0263468	0.327872	Environmental Information Processing	Signal transduction	gene15871|gene18813|gene5106	KLF2;GADD45B;PLK3
2	map04920	Adipocytokine signaling pathway	KEGG PATHWAY	2/52	73/11318	0.0442307	0.330256	Organismal Systems	Endocrine system	gene17471|gene10056	SOCS3;ACSL4
4	map04010	MAPK signaling pathway	KEGG PATHWAY	4/52	278/11318	0.0384093	0.330911	Environmental Information Processing	Signal transduction	gene13078|gene13852|gene18813|gene9948	AREG;DUSP1;GADD45B;MYC
1	map00061	Fatty acid biosynthesis	KEGG PATHWAY	1/52	16/11318	0.0710772	0.331693	Metabolism	Lipid metabolism	gene10056	ACSL4
2	map04540	Gap junction	KEGG PATHWAY	2/52	91/11318	0.0654442	0.333171	Cellular Processes	Cellular community - eukaryotes	gene15729|gene6855	HTR2B;HTR2A
2	map05220	Chronic myeloid leukemia	KEGG PATHWAY	2/52	79/11318	0.0509661	0.335777	Human Diseases	Cancer: specific types	gene9948|gene18813	MYC;GADD45B
2	map04391	Hippo signaling pathway - fly	KEGG PATHWAY	2/52	77/11318	0.0486817	0.340772	Environmental Information Processing	Signal transduction	gene9948|gene14962	MYC;MOB1B
2	map04974	Protein digestion and absorption	KEGG PATHWAY	2/52	95/11318	0.0705442	0.34352	Organismal Systems	Digestive system	gene1792|gene2031	SLC38A2;KCNK5
2	map04742	Taste transduction	KEGG PATHWAY	2/52	54/11318	0.0254458	0.356241	Organismal Systems	Sensory system	gene2031|gene7410	KCNK5;HTR1A
3	map05169	Epstein-Barr virus infection	KEGG PATHWAY	3/52	200/11318	0.0639482	0.35811	Human Diseases	Infectious disease: viral	gene9948|gene1497|gene18813	MYC;LOC106044451;GADD45B
3	map04020	Calcium signaling pathway	KEGG PATHWAY	3/52	200/11318	0.0639482	0.35811	Environmental Information Processing	Signal transduction	gene15729|gene10996|gene6855	HTR2B;MYLK3;HTR2A
1	map04216	Ferroptosis	KEGG PATHWAY	1/52	36/11318	0.152987	0.372489	Cellular Processes	Cell growth and death	gene10056	ACSL4
2	map05225	Hepatocellular carcinoma	KEGG PATHWAY	2/52	154/11318	0.157476	0.375261	Human Diseases	Cancer: specific types	gene9948|gene18813	MYC;GADD45B
2	map05226	Gastric cancer	KEGG PATHWAY	2/52	150/11318	0.151061	0.375975	Human Diseases	Cancer: specific types	gene9948|gene18813	MYC;GADD45B
2	map05224	Breast cancer	KEGG PATHWAY	2/52	149/11318	0.149466	0.380459	Human Diseases	Cancer: specific types	gene9948|gene18813	MYC;GADD45B
1	map04392	Hippo signaling pathway - multiple species	KEGG PATHWAY	1/52	32/11318	0.137193	0.384139	Environmental Information Processing	Signal transduction	gene14962	MOB1B
1	map00052	Galactose metabolism	KEGG PATHWAY	1/52	33/11318	0.141168	0.38563	Metabolism	Carbohydrate metabolism	gene19453	GCK
1	map05143	African trypanosomiasis	KEGG PATHWAY	1/52	34/11318	0.145125	0.387001	Human Diseases	Infectious disease: parasitic	gene12814	LOC106041602
1	map00051	Fructose and mannose metabolism	KEGG PATHWAY	1/52	34/11318	0.145125	0.387001	Metabolism	Carbohydrate metabolism	gene19453	GCK
2	map04640	Hematopoietic cell lineage	KEGG PATHWAY	2/52	89/11318	0.0629435	0.391649	Organismal Systems	Immune system	gene16336|gene1497	CD9;LOC106044451
2	map04012	ErbB signaling pathway	KEGG PATHWAY	2/52	89/11318	0.0629435	0.391649	Environmental Information Processing	Signal transduction	gene13078|gene9948	AREG;MYC
1	map04320	Dorso-ventral axis formation	KEGG PATHWAY	1/52	25/11318	0.108855	0.393284	Organismal Systems	Development and regeneration	gene7841	ETS2
1	map00071	Fatty acid degradation	KEGG PATHWAY	1/52	42/11318	0.176147	0.39457	Metabolism	Lipid metabolism	gene10056	ACSL4
2	map05206	MicroRNAs in cancer	KEGG PATHWAY	2/52	164/11318	0.173732	0.397101	Human Diseases	Cancer: overview	gene9948|gene1497	MYC;LOC106044451
1	map00500	Starch and sucrose metabolism	KEGG PATHWAY	1/52	41/11318	0.172331	0.402105	Metabolism	Carbohydrate metabolism	gene19453	GCK
2	map04514	Cell adhesion molecules (CAMs)	KEGG PATHWAY	2/52	141/11318	0.136841	0.40332	Environmental Information Processing	Signaling molecules and interaction	gene12814|gene12205	LOC106041602;SDC4
2	map04630	Jak-STAT signaling pathway	KEGG PATHWAY	2/52	141/11318	0.136841	0.40332	Environmental Information Processing	Signal transduction	gene17471|gene9948	SOCS3;MYC
1	map05219	Bladder cancer	KEGG PATHWAY	1/52	44/11318	0.183729	0.403483	Human Diseases	Cancer: specific types	gene9948	MYC
1	map00520	Amino sugar and nucleotide sugar metabolism	KEGG PATHWAY	1/52	45/11318	0.187494	0.403832	Metabolism	Carbohydrate metabolism	gene19453	GCK
1	map04973	Carbohydrate digestion and absorption	KEGG PATHWAY	1/52	46/11318	0.191242	0.404133	Organismal Systems	Digestive system	gene19453	GCK
1	map00565	Ether lipid metabolism	KEGG PATHWAY	1/52	46/11318	0.191242	0.404133	Metabolism	Lipid metabolism	gene10119	UGT8
2	map04910	Insulin signaling pathway	KEGG PATHWAY	2/52	139/11318	0.133724	0.404787	Organismal Systems	Endocrine system	gene17471|gene19453	SOCS3;GCK
1	map00790	Folate biosynthesis	KEGG PATHWAY	1/52	29/11318	0.125158	0.412285	Metabolism	Metabolism of cofactors and vitamins	gene15033	GCH1
1	map00512	Mucin type O-glycan biosynthesis	KEGG PATHWAY	1/52	31/11318	0.133199	0.414398	Metabolism	Glycan biosynthesis and metabolism	gene1204	B4GALT5
2	map04110	Cell cycle	KEGG PATHWAY	2/52	130/11318	0.119918	0.419714	Cellular Processes	Cell growth and death	gene9948|gene18813	MYC;GADD45B
2	map04371	Apelin signaling pathway	KEGG PATHWAY	2/52	130/11318	0.119918	0.419714	Environmental Information Processing	Signal transduction	gene15871|gene10996	KLF2;MYLK3
2	map05160	Hepatitis C	KEGG PATHWAY	2/52	138/11318	0.132172	0.422951	Human Diseases	Infectious disease: viral	gene17471|gene9948	SOCS3;MYC
1	map00600	Sphingolipid metabolism	KEGG PATHWAY	1/52	53/11318	0.217006	0.441904	Metabolism	Lipid metabolism	gene10119	UGT8
3	map04080	Neuroactive ligand-receptor interaction	KEGG PATHWAY	3/52	357/11318	0.225304	0.442702	Environmental Information Processing	Signaling molecules and interaction	gene15729|gene7410|gene6855	HTR2B;HTR1A;HTR2A
1	map05144	Malaria	KEGG PATHWAY	1/52	55/11318	0.224219	0.448437	Human Diseases	Infectious disease: parasitic	gene12814	LOC106041602
2	map05166	Human T-cell leukemia virus 1 infection	KEGG PATHWAY	2/52	203/11318	0.239184	0.461872	Human Diseases	Infectious disease: viral	gene9948|gene7841	MYC;ETS2
1	map00010	Glycolysis / Gluconeogenesis	KEGG PATHWAY	1/52	61/11318	0.245467	0.465971	Metabolism	Carbohydrate metabolism	gene19453	GCK
1	map05223	Non-small cell lung cancer	KEGG PATHWAY	1/52	63/11318	0.252422	0.471188	Human Diseases	Cancer: specific types	gene18813	GADD45B
1	map05416	Viral myocarditis	KEGG PATHWAY	1/52	77/11318	0.299378	0.472258	Human Diseases	Cardiovascular disease	gene19180	EIF4G3
1	map04013	MAPK signaling pathway - fly	KEGG PATHWAY	1/52	77/11318	0.299378	0.472258	Environmental Information Processing	Signal transduction	gene7841	ETS2
1	map04727	GABAergic synapse	KEGG PATHWAY	1/52	81/11318	0.312254	0.472601	Organismal Systems	Nervous system	gene1792	SLC38A2
1	map04917	Prolactin signaling pathway	KEGG PATHWAY	1/52	72/11318	0.28295	0.472991	Organismal Systems	Endocrine system	gene17471	SOCS3
1	map04146	Peroxisome	KEGG PATHWAY	1/52	80/11318	0.309057	0.47417	Cellular Processes	Transport and catabolism	gene10056	ACSL4
2	map05131	Shigellosis	KEGG PATHWAY	2/52	237/11318	0.29729	0.475664	Human Diseases	Infectious disease: bacterial	gene1497|gene19453	LOC106044451;GCK
1	map05218	Melanoma	KEGG PATHWAY	1/52	70/11318	0.276273	0.47604	Human Diseases	Cancer: specific types	gene18813	GADD45B
1	map04971	Gastric acid secretion	KEGG PATHWAY	1/52	70/11318	0.276273	0.47604	Organismal Systems	Digestive system	gene10996	MYLK3
1	map05212	Pancreatic cancer	KEGG PATHWAY	1/52	74/11318	0.289566	0.476932	Human Diseases	Cancer: specific types	gene18813	GADD45B
1	map05211	Renal cell carcinoma	KEGG PATHWAY	1/52	76/11318	0.296122	0.480662	Human Diseases	Cancer: specific types	gene7841	ETS2
1	map05217	Basal cell carcinoma	KEGG PATHWAY	1/52	66/11318	0.262737	0.482402	Human Diseases	Cancer: specific types	gene18813	GADD45B
1	map05214	Glioma	KEGG PATHWAY	1/52	69/11318	0.272912	0.485178	Human Diseases	Cancer: specific types	gene18813	GADD45B
1	map05221	Acute myeloid leukemia	KEGG PATHWAY	1/52	69/11318	0.272912	0.485178	Human Diseases	Cancer: specific types	gene9948	MYC
1	map04115	p53 signaling pathway	KEGG PATHWAY	1/52	68/11318	0.269536	0.486904	Cellular Processes	Cell growth and death	gene18813	GADD45B
1	map04657	IL-17 signaling pathway	KEGG PATHWAY	1/52	90/11318	0.340383	0.508305	Organismal Systems	Immune system	gene5597	MAPK6
1	map03320	PPAR signaling pathway	KEGG PATHWAY	1/52	93/11318	0.349506	0.515061	Organismal Systems	Endocrine system	gene10056	ACSL4
1	map04350	TGF-beta signaling pathway	KEGG PATHWAY	1/52	93/11318	0.349506	0.515061	Environmental Information Processing	Signal transduction	gene9948	MYC
1	map04066	HIF-1 signaling pathway	KEGG PATHWAY	1/52	104/11318	0.38191	0.534674	Environmental Information Processing	Signal transduction	gene19453	GCK
1	map04625	C-type lectin receptor signaling pathway	KEGG PATHWAY	1/52	102/11318	0.376139	0.540097	Organismal Systems	Immune system	gene5106	PLK3
1	map04933	AGE-RAGE signaling pathway in diabetic complications	KEGG PATHWAY	1/52	102/11318	0.376139	0.540097	Human Diseases	Endocrine and metabolic disease	gene12814	LOC106041602
1	map04724	Glutamatergic synapse	KEGG PATHWAY	1/52	110/11318	0.398913	0.551583	Organismal Systems	Nervous system	gene1792	SLC38A2
1	map04064	NF-kappa B signaling pathway	KEGG PATHWAY	1/52	114/11318	0.409992	0.559989	Environmental Information Processing	Signal transduction	gene18813	GADD45B
1	map04270	Vascular smooth muscle contraction	KEGG PATHWAY	1/52	120/11318	0.426236	0.561629	Organismal Systems	Circulatory system	gene10996	MYLK3
3	map05200	Pathways in cancer	KEGG PATHWAY	3/52	513/11318	0.42136	0.561813	Human Diseases	Cancer: overview	gene9948|gene7841|gene18813	MYC;ETS2;GADD45B
1	map04931	Insulin resistance	KEGG PATHWAY	1/52	117/11318	0.418169	0.564277	Human Diseases	Endocrine and metabolic disease	gene17471	SOCS3
1	map04210	Apoptosis	KEGG PATHWAY	1/52	146/11318	0.491703	0.585859	Cellular Processes	Cell growth and death	gene18813	GADD45B
1	map04550	Signaling pathways regulating pluripotency of stem cells	KEGG PATHWAY	1/52	140/11318	0.477278	0.58742	Cellular Processes	Cellular community - eukaryotes	gene9948	MYC
1	map04120	Ubiquitin mediated proteolysis	KEGG PATHWAY	1/52	140/11318	0.477278	0.58742	Genetic Information Processing	Folding, sorting and degradation	gene17471	SOCS3
1	map04310	Wnt signaling pathway	KEGG PATHWAY	1/52	145/11318	0.489326	0.589296	Environmental Information Processing	Signal transduction	gene9948	MYC
1	map04932	Non-alcoholic fatty liver disease (NAFLD)	KEGG PATHWAY	1/52	139/11318	0.474836	0.590907	Human Diseases	Endocrine and metabolic disease	gene17471	SOCS3
2	map04151	PI3K-Akt signaling pathway	KEGG PATHWAY	2/52	339/11318	0.464423	0.591084	Environmental Information Processing	Signal transduction	gene13078|gene9948	AREG;MYC
1	map03008	Ribosome biogenesis in eukaryotes	KEGG PATHWAY	1/52	137/11318	0.469916	0.591355	Genetic Information Processing	Translation	gene7782	PWP2
1	map04919	Thyroid hormone signaling pathway	KEGG PATHWAY	1/52	131/11318	0.454886	0.592409	Organismal Systems	Endocrine system	gene9948	MYC
1	map04611	Platelet activation	KEGG PATHWAY	1/52	131/11318	0.454886	0.592409	Organismal Systems	Immune system	gene10996	MYLK3
1	map04921	Oxytocin signaling pathway	KEGG PATHWAY	1/52	152/11318	0.505737	0.596238	Organismal Systems	Endocrine system	gene10996	MYLK3
1	map05164	Influenza A	KEGG PATHWAY	1/52	157/11318	0.517142	0.603332	Human Diseases	Infectious disease: viral	gene17471	SOCS3
1	map05161	Hepatitis B	KEGG PATHWAY	1/52	162/11318	0.528288	0.609982	Human Diseases	Infectious disease: viral	gene9948	MYC
1	map05167	Kaposi sarcoma-associated herpesvirus infection	KEGG PATHWAY	1/52	167/11318	0.539181	0.609983	Human Diseases	Infectious disease: viral	gene9948	MYC
1	map04022	cGMP-PKG signaling pathway	KEGG PATHWAY	1/52	167/11318	0.539181	0.609983	Environmental Information Processing	Signal transduction	gene10996	MYLK3
1	map05152	Tuberculosis	KEGG PATHWAY	1/52	166/11318	0.537022	0.61374	Human Diseases	Infectious disease: bacterial	gene5106	PLK3
1	map05168	Herpes simplex virus 1 infection	KEGG PATHWAY	1/52	175/11318	0.5561	0.616665	Human Diseases	Infectious disease: viral	gene17471	SOCS3
1	map04360	Axon guidance	KEGG PATHWAY	1/52	187/11318	0.580341	0.637238	Organismal Systems	Development and regeneration	gene19208	SEMA4B
1	map04060	Cytokine-cytokine receptor interaction	KEGG PATHWAY	1/52	205/11318	0.614288	0.655241	Environmental Information Processing	Signaling molecules and interaction	gene12056	TNFRSF6B
1	map03013	RNA transport	KEGG PATHWAY	1/52	222/11318	0.643869	0.655575	Genetic Information Processing	Translation	gene19180	EIF4G3
1	map04810	Regulation of actin cytoskeleton	KEGG PATHWAY	1/52	216/11318	0.633692	0.657162	Cellular Processes	Cell motility	gene10996	MYLK3
1	map04510	Focal adhesion	KEGG PATHWAY	1/52	220/11318	0.640507	0.658136	Cellular Processes	Cellular community - eukaryotes	gene10996	MYLK3
1	map05163	Human cytomegalovirus infection	KEGG PATHWAY	1/52	204/11318	0.612475	0.659588	Human Diseases	Infectious disease: viral	gene9948	MYC
1	map04714	Thermogenesis	KEGG PATHWAY	1/52	201/11318	0.606985	0.660023	Organismal Systems	Environmental adaptation	gene10056	ACSL4
1	map04024	cAMP signaling pathway	KEGG PATHWAY	1/52	215/11318	0.631968	0.661499	Environmental Information Processing	Signal transduction	gene7410	HTR1A
1	map05132	Salmonella infection	KEGG PATHWAY	1/52	212/11318	0.626749	0.662226	Human Diseases	Infectious disease: bacterial	gene9948	MYC
1	map04014	Ras signaling pathway	KEGG PATHWAY	1/52	237/11318	0.668113	0.674132	Environmental Information Processing	Signal transduction	gene7841	ETS2
1	map04144	Endocytosis	KEGG PATHWAY	1/52	244/11318	0.678866	0.678866	Cellular Processes	Transport and catabolism	gene6506	RAB11FIP4

## Sheet: blue
Num	Pathway id	Description	Database	Ratio_in_study	Ratio_in_pop	Pvalue	Padjust	First Category	Second Category	Gene_ids	Gene_names
5	map04390	Hippo signaling pathway	KEGG PATHWAY	45441	166/11318	5.70649e-05	0.00365215	Environmental Information Processing	Signal transduction	gene2646|gene2357|gene4032|gene16183|gene377	BMP5;FZD7;TCF7L2;PARD3;BMPR1A
1	map00072	Synthesis and degradation of ketone bodies	KEGG PATHWAY	45320	11/11318	0.027839	0.127264	Metabolism	Lipid metabolism	gene2647	HMGCLL1
3	map04144	Endocytosis	KEGG PATHWAY	45380	244/11318	0.0239303	0.139231	Cellular Processes	Transport and catabolism	gene16111|gene16183|gene12795	RAB11FIP2;PARD3;DNM3
2	map05215	Prostate cancer	KEGG PATHWAY	45351	101/11318	0.0273754	0.146002	Human Diseases	Cancer: specific types	gene13751|gene4032	ZEB1;TCF7L2
2	map04916	Melanogenesis	KEGG PATHWAY	45351	101/11318	0.0273754	0.146002	Organismal Systems	Endocrine system	gene2357|gene4032	FZD7;TCF7L2
2	map04350	TGF-beta signaling pathway	KEGG PATHWAY	45351	93/11318	0.0234838	0.150296	Environmental Information Processing	Signal transduction	gene2646|gene377	BMP5;BMPR1A
2	map05412	Arrhythmogenic right ventricular cardiomyopathy (ARVC)	KEGG PATHWAY	45351	90/11318	0.0220891	0.157078	Human Diseases	Cardiovascular disease	gene3016|gene4032	SGCB;TCF7L2
1	map04711	Circadian rhythm - fly	KEGG PATHWAY	45320	8/11318	0.0203217	0.162573	Organismal Systems	Environmental adaptation	gene6519	HLF
4	map05200	Pathways in cancer	KEGG PATHWAY	45411	513/11318	0.040359	0.172198	Human Diseases	Cancer: overview	gene14052|gene2519|gene4032|gene2357	LPAR4;RARB;TCF7L2;FZD7
4	map05165	Human papillomavirus infection	KEGG PATHWAY	45411	321/11318	0.00861637	0.183816	Human Diseases	Infectious disease: viral	gene2357|gene4032|gene16183|gene18555	FZD7;TCF7L2;PARD3;COMP
2	map04520	Adherens junction	KEGG PATHWAY	45351	86/11318	0.020286	0.185472	Cellular Processes	Cellular community - eukaryotes	gene4032|gene16183	TCF7L2;PARD3
2	map04072	Phospholipase D signaling pathway	KEGG PATHWAY	45351	158/11318	0.0615022	0.187435	Environmental Information Processing	Signal transduction	gene14052|gene12795	LPAR4;DNM3
2	map05225	Hepatocellular carcinoma	KEGG PATHWAY	45351	154/11318	0.0587829	0.188105	Human Diseases	Cancer: specific types	gene2357|gene4032	FZD7;TCF7L2
3	map04015	Rap1 signaling pathway	KEGG PATHWAY	45380	219/11318	0.0180301	0.192321	Environmental Information Processing	Signal transduction	gene14052|gene16183|gene5700	LPAR4;PARD3;TLN2
2	map04934	Cushing syndrome	KEGG PATHWAY	45351	152/11318	0.0574398	0.193481	Human Diseases	Endocrine and metabolic disease	gene2357|gene4032	FZD7;TCF7L2
1	map00650	Butanoate metabolism	KEGG PATHWAY	45320	27/11318	0.0670003	0.19491	Metabolism	Carbohydrate metabolism	gene2647	HMGCLL1
2	map05217	Basal cell carcinoma	KEGG PATHWAY	45351	66/11318	0.0122864	0.196582	Human Diseases	Cancer: specific types	gene2357|gene4032	FZD7;TCF7L2
2	map05224	Breast cancer	KEGG PATHWAY	45351	149/11318	0.0554461	0.197142	Human Diseases	Cancer: specific types	gene2357|gene4032	FZD7;TCF7L2
2	map04550	Signaling pathways regulating pluripotency of stem cells	KEGG PATHWAY	45351	140/11318	0.0496207	0.198483	Cellular Processes	Cellular community - eukaryotes	gene2357|gene377	FZD7;BMPR1A
2	map04310	Wnt signaling pathway	KEGG PATHWAY	45351	145/11318	0.0528278	0.198881	Environmental Information Processing	Signal transduction	gene2357|gene4032	FZD7;TCF7L2
3	map05226	Gastric cancer	KEGG PATHWAY	45380	150/11318	0.00647714	0.207268	Human Diseases	Cancer: specific types	gene2519|gene4032|gene2357	RARB;TCF7L2;FZD7
2	map04721	Synaptic vesicle cycle	KEGG PATHWAY	45351	77/11318	0.0164717	0.210837	Organismal Systems	Nervous system	gene10243|gene12795	LOC106038813;DNM3
1	map05216	Thyroid cancer	KEGG PATHWAY	45320	33/11318	0.0812894	0.226197	Human Diseases	Cancer: specific types	gene4032	TCF7L2
1	map00260	Glycine, serine and threonine metabolism	KEGG PATHWAY	45320	41/11318	0.100013	0.256034	Metabolism	Amino acid metabolism	gene19474	CHDH
2	map04060	Cytokine-cytokine receptor interaction	KEGG PATHWAY	45351	205/11318	0.0963959	0.257056	Environmental Information Processing	Signaling molecules and interaction	gene2646|gene377	BMP5;BMPR1A
2	map04510	Focal adhesion	KEGG PATHWAY	45351	220/11318	0.108514	0.267112	Cellular Processes	Cellular community - eukaryotes	gene18555|gene5700	COMP;TLN2
1	map04961	Endocrine and other factor-regulated calcium reabsorption	KEGG PATHWAY	45320	47/11318	0.113814	0.269781	Organismal Systems	Excretory system	gene12795	DNM3
1	map05213	Endometrial cancer	KEGG PATHWAY	45320	59/11318	0.140805	0.300383	Human Diseases	Cancer: specific types	gene4032	TCF7L2
1	map05144	Malaria	KEGG PATHWAY	45320	55/11318	0.131897	0.301479	Human Diseases	Infectious disease: parasitic	gene18555	COMP
1	map00280	Valine, leucine and isoleucine degradation	KEGG PATHWAY	45320	58/11318	0.138586	0.305845	Metabolism	Amino acid metabolism	gene2647	HMGCLL1
1	map05223	Non-small cell lung cancer	KEGG PATHWAY	45320	63/11318	0.149624	0.308901	Human Diseases	Cancer: specific types	gene2519	RARB
1	map05221	Acute myeloid leukemia	KEGG PATHWAY	45320	69/11318	0.162689	0.325378	Human Diseases	Cancer: specific types	gene4032	TCF7L2
1	map05410	Hypertrophic cardiomyopathy (HCM)	KEGG PATHWAY	45320	103/11318	0.233142	0.339116	Human Diseases	Cardiovascular disease	gene3016	SGCB
1	map04512	ECM-receptor interaction	KEGG PATHWAY	45320	98/11318	0.223153	0.340043	Environmental Information Processing	Signaling molecules and interaction	gene18555	COMP
1	map04146	Peroxisome	KEGG PATHWAY	45320	80/11318	0.18614	0.34037	Cellular Processes	Transport and catabolism	gene2647	HMGCLL1
2	map04151	PI3K-Akt signaling pathway	KEGG PATHWAY	45351	339/11318	0.215214	0.344342	Environmental Information Processing	Signal transduction	gene14052|gene18555	LPAR4;COMP
1	map05222	Small cell lung cancer	KEGG PATHWAY	45320	97/11318	0.22114	0.345194	Human Diseases	Cancer: specific types	gene2519	RARB
2	map04080	Neuroactive ligand-receptor interaction	KEGG PATHWAY	45351	357/11318	0.232319	0.345778	Environmental Information Processing	Signaling molecules and interaction	gene14052|gene16183	LPAR4;PARD3
1	map04391	Hippo signaling pathway - fly	KEGG PATHWAY	45320	77/11318	0.179808	0.348718	Environmental Information Processing	Signal transduction	gene16183	PARD3
1	map05416	Viral myocarditis	KEGG PATHWAY	45320	77/11318	0.179808	0.348718	Human Diseases	Cardiovascular disease	gene3016	SGCB
1	map05322	Systemic lupus erythematosus	KEGG PATHWAY	45320	93/11318	0.213038	0.349601	Human Diseases	Immune disease	gene1566	LOC106045814
1	map05414	Dilated cardiomyopathy (DCM)	KEGG PATHWAY	45320	110/11318	0.24692	0.351174	Human Diseases	Cardiovascular disease	gene3016	SGCB
1	map05210	Colorectal cancer	KEGG PATHWAY	45320	91/11318	0.208956	0.351926	Human Diseases	Cancer: specific types	gene4032	TCF7L2
1	map05100	Bacterial invasion of epithelial cells	KEGG PATHWAY	45320	89/11318	0.204854	0.354343	Human Diseases	Infectious disease: bacterial	gene12795	DNM3
1	map04610	Complement and coagulation cascades	KEGG PATHWAY	45320	88/11318	0.202796	0.360526	Organismal Systems	Immune system	gene6683	F13A1
1	map05034	Alcoholism	KEGG PATHWAY	45320	124/11318	0.27376	0.380884	Human Diseases	Substance dependence	gene1566	LOC106045814
1	map04611	Platelet activation	KEGG PATHWAY	45320	131/11318	0.286832	0.39058	Organismal Systems	Immune system	gene5700	TLN2
1	map05418	Fluid shear stress and atherosclerosis	KEGG PATHWAY	45320	136/11318	0.29603	0.394706	Human Diseases	Cardiovascular disease	gene377	BMPR1A
1	map04150	mTOR signaling pathway	KEGG PATHWAY	45320	148/11318	0.317639	0.414875	Environmental Information Processing	Signal transduction	gene2357	FZD7
1	map05206	MicroRNAs in cancer	KEGG PATHWAY	45320	164/11318	0.345457	0.425178	Human Diseases	Cancer: overview	gene13751	ZEB1
1	map04145	Phagosome	KEGG PATHWAY	45320	158/11318	0.335156	0.429	Cellular Processes	Transport and catabolism	gene18555	COMP
1	map04062	Chemokine signaling pathway	KEGG PATHWAY	45320	163/11318	0.343751	0.431374	Organismal Systems	Immune system	gene16183	PARD3
1	map04530	Tight junction	KEGG PATHWAY	45320	191/11318	0.389936	0.445641	Cellular Processes	Cellular community - eukaryotes	gene16183	PARD3
1	map05202	Transcriptional misregulation in cancer	KEGG PATHWAY	45320	188/11318	0.385142	0.448165	Human Diseases	Cancer: overview	gene13751	ZEB1
1	map05203	Viral carcinogenesis	KEGG PATHWAY	45320	181/11318	0.373813	0.451397	Human Diseases	Cancer: overview	gene1566	LOC106045814
1	map04360	Axon guidance	KEGG PATHWAY	45320	187/11318	0.383535	0.45456	Organismal Systems	Development and regeneration	gene16183	PARD3
1	map05166	Human T-cell leukemia virus 1 infection	KEGG PATHWAY	45320	203/11318	0.408754	0.458951	Human Diseases	Infectious disease: viral	gene5700	TLN2
1	map04810	Regulation of actin cytoskeleton	KEGG PATHWAY	45320	216/11318	0.428507	0.464821	Cellular Processes	Cell motility	gene14052	LPAR4
1	map05132	Salmonella infection	KEGG PATHWAY	45320	212/11318	0.422498	0.466205	Human Diseases	Infectious disease: bacterial	gene4032	TCF7L2
1	map05130	Pathogenic Escherichia coli infection	KEGG PATHWAY	45320	231/11318	0.450508	0.472664	Human Diseases	Infectious disease: bacterial	gene14052	LPAR4
1	map05131	Shigellosis	KEGG PATHWAY	45320	237/11318	0.459078	0.473887	Human Diseases	Infectious disease: bacterial	gene5700	TLN2
1	map05205	Proteoglycans in cancer	KEGG PATHWAY	45320	229/11318	0.447623	0.477464	Human Diseases	Cancer: overview	gene2357	FZD7
1	map05016	Huntington disease	KEGG PATHWAY	45320	255/11318	0.484019	0.491702	Human Diseases	Neurodegenerative disease	gene16085	DNAI1
1	map05010	Alzheimer disease	KEGG PATHWAY	45320	308/11318	0.551177	0.551177	Human Diseases	Neurodegenerative disease	gene2357	FZD7

## Sheet: brown
Num	Pathway id	Description	Database	Ratio_in_study	Ratio_in_pop	Pvalue	Padjust	First Category	Second Category	Gene_ids	Gene_names
3	map04146	Peroxisome	KEGG PATHWAY	45379	80/11318	0.00098082	0.049041	Cellular Processes	Transport and catabolism	gene16708|gene15295|gene10595	PECR;PEX14;EHHADH
2	map00640	Propanoate metabolism	KEGG PATHWAY	45350	41/11318	0.00455967	0.0759945	Metabolism	Carbohydrate metabolism	gene10595|gene3267	EHHADH;ACACB
3	map04152	AMPK signaling pathway	KEGG PATHWAY	45379	127/11318	0.00368262	0.0920656	Environmental Information Processing	Signal transduction	gene4973|gene3267|gene13911	PRKAA2;ACACB;LOC106042848
2	map04920	Adipocytokine signaling pathway	KEGG PATHWAY	45350	73/11318	0.0139184	0.17398	Organismal Systems	Endocrine system	gene4973|gene3267	PRKAA2;ACACB
2	map04922	Glucagon signaling pathway	KEGG PATHWAY	45350	97/11318	0.0237778	0.237778	Organismal Systems	Endocrine system	gene4973|gene3267	PRKAA2;ACACB
1	map00061	Fatty acid biosynthesis	KEGG PATHWAY	45319	16/11318	0.0388822	0.243014	Metabolism	Lipid metabolism	gene3267	ACACB
1	map00730	Thiamine metabolism	KEGG PATHWAY	45319	14/11318	0.0341029	0.243592	Metabolism	Metabolism of cofactors and vitamins	gene1856	NTPCR
2	map04910	Insulin signaling pathway	KEGG PATHWAY	45350	139/11318	0.0459714	0.255397	Organismal Systems	Endocrine system	gene4973|gene3267	PRKAA2;ACACB
2	map04931	Insulin resistance	KEGG PATHWAY	45350	117/11318	0.0336233	0.280194	Human Diseases	Endocrine and metabolic disease	gene4973|gene3267	PRKAA2;ACACB
1	map00380	Tryptophan metabolism	KEGG PATHWAY	45319	44/11318	0.103445	0.304251	Metabolism	Amino acid metabolism	gene10595	EHHADH
1	map03022	Basal transcription factors	KEGG PATHWAY	45319	47/11318	0.110109	0.305859	Genetic Information Processing	Transcription	gene12341	GTF2I
1	map04340	Hedgehog signaling pathway	KEGG PATHWAY	45319	43/11318	0.101213	0.316291	Environmental Information Processing	Signal transduction	gene601	EVC2
1	map00650	Butanoate metabolism	KEGG PATHWAY	45319	27/11318	0.0647637	0.323818	Metabolism	Carbohydrate metabolism	gene10595	EHHADH
1	map00410	beta-Alanine metabolism	KEGG PATHWAY	45319	36/11318	0.0854383	0.328609	Metabolism	Metabolism of other amino acids	gene10595	EHHADH
1	map00620	Pyruvate metabolism	KEGG PATHWAY	45319	39/11318	0.0922314	0.329398	Metabolism	Carbohydrate metabolism	gene3267	ACACB
1	map00071	Fatty acid degradation	KEGG PATHWAY	45319	42/11318	0.0989758	0.329919	Metabolism	Lipid metabolism	gene10595	EHHADH
1	map00051	Fructose and mannose metabolism	KEGG PATHWAY	45319	34/11318	0.0808824	0.33701	Metabolism	Carbohydrate metabolism	gene13911	LOC106042848
1	map04137	Mitophagy - animal	KEGG PATHWAY	45319	62/11318	0.142719	0.339808	Cellular Processes	Transport and catabolism	gene4580	CITED2
1	map04710	Circadian rhythm	KEGG PATHWAY	45319	32/11318	0.0763046	0.346839	Organismal Systems	Environmental adaptation	gene4973	PRKAA2
1	map04213	Longevity regulating pathway - multiple species	KEGG PATHWAY	45319	58/11318	0.134138	0.352994	Organismal Systems	Aging	gene4973	PRKAA2
1	map00280	Valine, leucine and isoleucine degradation	KEGG PATHWAY	45319	58/11318	0.134138	0.352994	Metabolism	Amino acid metabolism	gene10595	EHHADH
1	map00310	Lysine degradation	KEGG PATHWAY	45319	71/11318	0.161729	0.367566	Metabolism	Amino acid metabolism	gene10595	EHHADH
1	map04114	Oocyte meiosis	KEGG PATHWAY	45319	104/11318	0.228014	0.380023	Cellular Processes	Cell growth and death	gene3340	ANAPC5
1	map04921	Oxytocin signaling pathway	KEGG PATHWAY	45319	152/11318	0.315483	0.384735	Organismal Systems	Endocrine system	gene4973	PRKAA2
1	map04150	mTOR signaling pathway	KEGG PATHWAY	45319	148/11318	0.308575	0.385719	Environmental Information Processing	Signal transduction	gene4973	PRKAA2
1	map04120	Ubiquitin mediated proteolysis	KEGG PATHWAY	45319	140/11318	0.294557	0.387576	Genetic Information Processing	Folding, sorting and degradation	gene3340	ANAPC5
1	map04068	FoxO signaling pathway	KEGG PATHWAY	45319	140/11318	0.294557	0.387576	Environmental Information Processing	Signal transduction	gene4973	PRKAA2
1	map05410	Hypertrophic cardiomyopathy (HCM)	KEGG PATHWAY	45319	103/11318	0.226082	0.389796	Human Diseases	Cardiovascular disease	gene4973	PRKAA2
1	map04914	Progesterone-mediated oocyte maturation	KEGG PATHWAY	45319	80/11318	0.180332	0.392026	Organismal Systems	Endocrine system	gene3340	ANAPC5
1	map00564	Glycerophospholipid metabolism	KEGG PATHWAY	45319	100/11318	0.220257	0.393316	Metabolism	Lipid metabolism	gene18296	CDS2
1	map04070	Phosphatidylinositol signaling system	KEGG PATHWAY	45319	96/11318	0.212425	0.39338	Environmental Information Processing	Signal transduction	gene18296	CDS2
1	map04932	Non-alcoholic fatty liver disease (NAFLD)	KEGG PATHWAY	45319	139/11318	0.292786	0.395657	Human Diseases	Endocrine and metabolic disease	gene4973	PRKAA2
1	map03320	PPAR signaling pathway	KEGG PATHWAY	45319	93/11318	0.206501	0.397118	Organismal Systems	Endocrine system	gene10595	EHHADH
1	map04657	IL-17 signaling pathway	KEGG PATHWAY	45319	90/11318	0.200535	0.40107	Organismal Systems	Immune system	gene3340	ANAPC5
1	map00230	Purine metabolism	KEGG PATHWAY	45319	137/11318	0.28923	0.401709	Metabolism	Nucleotide metabolism	gene1856	NTPCR
1	map04022	cGMP-PKG signaling pathway	KEGG PATHWAY	45319	167/11318	0.340799	0.405713	Environmental Information Processing	Signal transduction	gene12341	GTF2I
1	map04142	Lysosome	KEGG PATHWAY	45319	131/11318	0.27846	0.4095	Cellular Processes	Transport and catabolism	gene14924	CLN5
1	map05418	Fluid shear stress and atherosclerosis	KEGG PATHWAY	45319	136/11318	0.287446	0.410637	Human Diseases	Cardiovascular disease	gene4973	PRKAA2
1	map04211	Longevity regulating pathway	KEGG PATHWAY	45319	89/11318	0.198536	0.413617	Organismal Systems	Aging	gene4973	PRKAA2
1	map04530	Tight junction	KEGG PATHWAY	45319	191/11318	0.379437	0.431179	Cellular Processes	Cellular community - eukaryotes	gene4973	PRKAA2
1	map04110	Cell cycle	KEGG PATHWAY	45319	130/11318	0.27665	0.432265	Cellular Processes	Cell growth and death	gene3340	ANAPC5
1	map04371	Apelin signaling pathway	KEGG PATHWAY	45319	130/11318	0.27665	0.432265	Environmental Information Processing	Signal transduction	gene4973	PRKAA2
1	map05166	Human T-cell leukemia virus 1 infection	KEGG PATHWAY	45319	203/11318	0.397928	0.43253	Human Diseases	Infectious disease: viral	gene3340	ANAPC5
1	map04360	Axon guidance	KEGG PATHWAY	45319	187/11318	0.373153	0.433899	Organismal Systems	Development and regeneration	gene5579	SEMA6D
1	map04140	Autophagy - animal	KEGG PATHWAY	45319	126/11318	0.269364	0.434459	Cellular Processes	Transport and catabolism	gene4973	PRKAA2
1	map04714	Thermogenesis	KEGG PATHWAY	45319	201/11318	0.394884	0.438759	Organismal Systems	Environmental adaptation	gene4973	PRKAA2
1	map04810	Regulation of actin cytoskeleton	KEGG PATHWAY	45319	216/11318	0.41736	0.444	Cellular Processes	Cell motility	gene10674	ARHGEF4
1	map05130	Pathogenic Escherichia coli infection	KEGG PATHWAY	45319	231/11318	0.43903	0.457323	Human Diseases	Infectious disease: bacterial	gene5505	BAIAP2L1
1	map04144	Endocytosis	KEGG PATHWAY	45319	244/11318	0.457181	0.466511	Cellular Processes	Transport and catabolism	gene17947	SH3GLB2
1	map04151	PI3K-Akt signaling pathway	KEGG PATHWAY	45319	339/11318	0.573658	0.573658	Environmental Information Processing	Signal transduction	gene4973	PRKAA2

## Sheet: green
Num	Pathway id	Description	Database	Ratio_in_study	Ratio_in_pop	Pvalue	Padjust	First Category	Second Category	Gene_ids	Gene_names
5	map05150	Staphylococcus aureus infection	KEGG PATHWAY	5/77	76/11318	0.000162007	0.0122315	Human Diseases	Infectious disease: bacterial	gene11570|gene18600|gene18593|gene18599|gene20066	MASP2;LOC106047979;LOC106047978;LOC106048011;LOC106049570
5	map04912	GnRH signaling pathway	KEGG PATHWAY	5/77	84/11318	0.000259513	0.0130622	Organismal Systems	Endocrine system	gene1358|gene1359|gene17154|gene1362|gene10183	LOC106042968;LOC106042978;EGFR;LOC106042972;LOC106038708
6	map04915	Estrogen signaling pathway	KEGG PATHWAY	6/77	117/11318	0.000139946	0.0211319	Organismal Systems	Endocrine system	gene10183|gene18593|gene20066|gene17154|gene18600|gene18599	LOC106038708;LOC106047978;LOC106049570;EGFR;LOC106047979;LOC106048011
5	map00564	Glycerophospholipid metabolism	KEGG PATHWAY	5/77	100/11318	0.000581623	0.0219563	Metabolism	Lipid metabolism	gene1358|gene1359|gene18766|gene1362|gene12296	LOC106042968;LOC106042978;CDS1;LOC106042972;LOC106041043
3	map00592	alpha-Linolenic acid metabolism	KEGG PATHWAY	3/77	28/11318	0.000877601	0.0265036	Metabolism	Lipid metabolism	gene1358|gene1359|gene1362	LOC106042968;LOC106042978;LOC106042972
3	map00591	Linoleic acid metabolism	KEGG PATHWAY	3/77	31/11318	0.00118664	0.0298639	Metabolism	Lipid metabolism	gene1358|gene1359|gene1362	LOC106042968;LOC106042978;LOC106042972
5	map05168	Herpes simplex virus 1 infection	KEGG PATHWAY	5/77	175/11318	0.00672648	0.059747	Human Diseases	Infectious disease: viral	gene20335|gene15178|gene3889|gene20642|gene11333	LOC106049856;PML;IRF7;TAP2;STAT1
4	map04724	Glutamatergic synapse	KEGG PATHWAY	4/77	110/11318	0.0066352	0.0626197	Organismal Systems	Nervous system	gene1358|gene1359|gene1362|gene8728	LOC106042968;LOC106042978;LOC106042972;GRIN1
3	map04913	Ovarian steroidogenesis	KEGG PATHWAY	3/77	54/11318	0.00585478	0.063148	Organismal Systems	Endocrine system	gene1358|gene1359|gene1362	LOC106042968;LOC106042978;LOC106042972
3	map04730	Long-term depression	KEGG PATHWAY	3/77	63/11318	0.00897361	0.0645245	Organismal Systems	Nervous system	gene1358|gene1359|gene1362	LOC106042968;LOC106042978;LOC106042972
3	map00600	Sphingolipid metabolism	KEGG PATHWAY	3/77	53/11318	0.0055564	0.0645397	Metabolism	Lipid metabolism	gene8160|gene7964|gene19078	CERS3;SGPP2;LOC106048496
4	map05231	Choline metabolism in cancer	KEGG PATHWAY	4/77	115/11318	0.00774611	0.0649812	Human Diseases	Cancer: overview	gene1358|gene1359|gene17154|gene1362	LOC106042968;LOC106042978;EGFR;LOC106042972
3	map00590	Arachidonic acid metabolism	KEGG PATHWAY	3/77	56/11318	0.00647993	0.0652313	Metabolism	Lipid metabolism	gene1358|gene1359|gene1362	LOC106042968;LOC106042978;LOC106042972
4	map04270	Vascular smooth muscle contraction	KEGG PATHWAY	4/77	120/11318	0.0089732	0.0677477	Organismal Systems	Circulatory system	gene1358|gene1359|gene1362|gene10183	LOC106042968;LOC106042978;LOC106042972;LOC106038708
3	map04370	VEGF signaling pathway	KEGG PATHWAY	3/77	62/11318	0.00858774	0.06825	Environmental Information Processing	Signal transduction	gene1358|gene1359|gene1362	LOC106042968;LOC106042978;LOC106042972
6	map04014	Ras signaling pathway	KEGG PATHWAY	6/77	237/11318	0.00543824	0.0684312	Environmental Information Processing	Signal transduction	gene1358|gene1359|gene1362|gene10183|gene17154|gene8728	LOC106042968;LOC106042978;LOC106042972;LOC106038708;EGFR;GRIN1
3	map02010	ABC transporters	KEGG PATHWAY	3/77	51/11318	0.00498764	0.0684667	Environmental Information Processing	Membrane transport	gene20335|gene20642|gene6349	LOC106049856;TAP2;ABCA12
4	map04750	Inflammatory mediator regulation of TRP channels	KEGG PATHWAY	4/77	99/11318	0.00457574	0.0690937	Organismal Systems	Sensory system	gene1358|gene1359|gene1362|gene10183	LOC106042968;LOC106042978;LOC106042972;LOC106038708
3	map00565	Ether lipid metabolism	KEGG PATHWAY	3/77	46/11318	0.00372503	0.07031	Metabolism	Lipid metabolism	gene1358|gene1359|gene1362	LOC106042968;LOC106042978;LOC106042972
5	map04072	Phospholipase D signaling pathway	KEGG PATHWAY	5/77	158/11318	0.00438353	0.0735459	Environmental Information Processing	Signal transduction	gene1358|gene1359|gene17154|gene1362|gene12296	LOC106042968;LOC106042978;EGFR;LOC106042972;LOC106041043
3	map04664	Fc epsilon RI signaling pathway	KEGG PATHWAY	3/77	71/11318	0.0124258	0.0750517	Organismal Systems	Immune system	gene1358|gene1359|gene1362	LOC106042968;LOC106042978;LOC106042972
3	map04115	p53 signaling pathway	KEGG PATHWAY	3/77	68/11318	0.0110544	0.0758736	Cellular Processes	Cell growth and death	gene18522|gene4566|gene11327	SFN;LOC106032402;SERPINB5
2	map04320	Dorso-ventral axis formation	KEGG PATHWAY	2/77	25/11318	0.012386	0.0779287	Organismal Systems	Development and regeneration	gene17154|gene19016	EGFR;ETV7
4	map04217	Necroptosis	KEGG PATHWAY	4/77	131/11318	0.012104	0.0794654	Cellular Processes	Cell growth and death	gene1358|gene1359|gene1362|gene11333	LOC106042968;LOC106042978;LOC106042972;STAT1
5	map04921	Oxytocin signaling pathway	KEGG PATHWAY	5/77	152/11318	0.00371803	0.0802032	Organismal Systems	Endocrine system	gene1358|gene1359|gene17154|gene1362|gene10183	LOC106042968;LOC106042978;EGFR;LOC106042972;LOC106038708
4	map05164	Influenza A	KEGG PATHWAY	4/77	157/11318	0.0220651	0.128148	Human Diseases	Infectious disease: viral	gene15178|gene3889|gene19934|gene11333	PML;IRF7;LOC106049424;STAT1
3	map05412	Arrhythmogenic right ventricular cardiomyopathy (ARVC)	KEGG PATHWAY	3/77	90/11318	0.023309	0.130358	Human Diseases	Cardiovascular disease	gene9162|gene6673|gene9164	LOC106037565;DSP;DSG2
2	map05340	Primary immunodeficiency	KEGG PATHWAY	2/77	39/11318	0.0287806	0.15521	Human Diseases	Immune disease	gene20335|gene20642	LOC106049856;TAP2
3	map04726	Serotonergic synapse	KEGG PATHWAY	3/77	103/11318	0.0329709	0.171676	Organismal Systems	Nervous system	gene1358|gene1359|gene1362	LOC106042968;LOC106042978;LOC106042972
2	map05219	Bladder cancer	KEGG PATHWAY	2/77	44/11318	0.0359539	0.180968	Human Diseases	Cancer: specific types	gene17154|gene17323	EGFR;LOC106046592
3	map04666	Fc gamma R-mediated phagocytosis	KEGG PATHWAY	3/77	111/11318	0.0398044	0.193886	Organismal Systems	Immune system	gene1358|gene1359|gene1362	LOC106042968;LOC106042978;LOC106042972
4	map05169	Epstein-Barr virus infection	KEGG PATHWAY	4/77	200/11318	0.047216	0.216049	Human Diseases	Infectious disease: viral	gene20335|gene3889|gene20642|gene11333	LOC106049856;IRF7;TAP2;STAT1
2	map04612	Antigen processing and presentation	KEGG PATHWAY	2/77	52/11318	0.0486817	0.216204	Organismal Systems	Immune system	gene20335|gene20642	LOC106049856;TAP2
4	map05163	Human cytomegalovirus infection	KEGG PATHWAY	4/77	204/11318	0.0501268	0.216261	Human Diseases	Infectious disease: viral	gene20335|gene17154|gene20642|gene10183	LOC106049856;EGFR;TAP2;LOC106038708
2	map04214	Apoptosis - fly	KEGG PATHWAY	2/77	51/11318	0.0470119	0.221837	Cellular Processes	Cell growth and death	gene17154|gene15756	EGFR;TP63
4	map04015	Rap1 signaling pathway	KEGG PATHWAY	4/77	219/11318	0.0619064	0.239689	Environmental Information Processing	Signal transduction	gene17154|gene8728|gene17323|gene10183	EGFR;GRIN1;LOC106046592;LOC106038708
2	map04720	Long-term potentiation	KEGG PATHWAY	2/77	61/11318	0.0646306	0.24398	Organismal Systems	Nervous system	gene8728|gene10183	GRIN1;LOC106038708
3	map04630	Jak-STAT signaling pathway	KEGG PATHWAY	3/77	141/11318	0.0711778	0.244269	Environmental Information Processing	Signal transduction	gene17154|gene9415|gene11333	EGFR;IL22RA1;STAT1
2	map04622	RIG-I-like receptor signaling pathway	KEGG PATHWAY	2/77	63/11318	0.0683847	0.245859	Organismal Systems	Immune system	gene3889|gene18619	IRF7;LOC106047988
2	map04924	Renin secretion	KEGG PATHWAY	2/77	64/11318	0.0702885	0.246827	Organismal Systems	Endocrine system	gene5948|gene10183	LOC106034001;LOC106038708
2	map05213	Endometrial cancer	KEGG PATHWAY	2/77	59/11318	0.0609496	0.24874	Human Diseases	Cancer: specific types	gene17154|gene17323	EGFR;LOC106046592
2	map05031	Amphetamine addiction	KEGG PATHWAY	2/77	59/11318	0.0609496	0.24874	Human Diseases	Substance dependence	gene8728|gene10183	GRIN1;LOC106038708
3	map05160	Hepatitis C	KEGG PATHWAY	3/77	138/11318	0.067651	0.249154	Human Diseases	Infectious disease: viral	gene17154|gene3889|gene11333	EGFR;IRF7;STAT1
3	map04611	Platelet activation	KEGG PATHWAY	3/77	131/11318	0.0597477	0.250608	Organismal Systems	Immune system	gene1358|gene1359|gene1362	LOC106042968;LOC106042978;LOC106042972
2	map05214	Glioma	KEGG PATHWAY	2/77	69/11318	0.0800607	0.268648	Human Diseases	Cancer: specific types	gene17154|gene10183	EGFR;LOC106038708
2	map05218	Melanoma	KEGG PATHWAY	2/77	70/11318	0.0820637	0.269383	Human Diseases	Cancer: specific types	gene17154|gene17323	EGFR;LOC106046592
2	map05212	Pancreatic cancer	KEGG PATHWAY	2/77	74/11318	0.0902276	0.28988	Human Diseases	Cancer: specific types	gene17154|gene11333	EGFR;STAT1
2	map04970	Salivary secretion	KEGG PATHWAY	2/77	77/11318	0.0965018	0.303579	Organismal Systems	Digestive system	gene19256|gene10183	AQP5;LOC106038708
2	map04013	MAPK signaling pathway - fly	KEGG PATHWAY	2/77	77/11318	0.0965018	0.303579	Environmental Information Processing	Signal transduction	gene17154|gene19016	EGFR;ETV7
3	map05206	MicroRNAs in cancer	KEGG PATHWAY	3/77	164/11318	0.100824	0.304489	Human Diseases	Cancer: overview	gene11327|gene17154|gene15756	SERPINB5;EGFR;TP63
3	map05167	Kaposi sarcoma-associated herpesvirus infection	KEGG PATHWAY	3/77	167/11318	0.105009	0.31091	Human Diseases	Infectious disease: viral	gene3889|gene10183|gene11333	IRF7;LOC106038708;STAT1
2	map04520	Adherens junction	KEGG PATHWAY	2/77	86/11318	0.116023	0.336913	Cellular Processes	Cellular community - eukaryotes	gene17154|gene17323	EGFR;LOC106046592
4	map04010	MAPK signaling pathway	KEGG PATHWAY	4/77	278/11318	0.120793	0.344147	Environmental Information Processing	Signal transduction	gene1358|gene1359|gene17154|gene1362	LOC106042968;LOC106042978;EGFR;LOC106042972
1	map00511	Other glycan degradation	KEGG PATHWAY	1/77	20/11318	0.127722	0.357147	Metabolism	Glycan biosynthesis and metabolism	gene19078	LOC106048496
2	map04070	Phosphatidylinositol signaling system	KEGG PATHWAY	2/77	96/11318	0.138762	0.367597	Environmental Information Processing	Signal transduction	gene18766|gene10183	CDS1;LOC106038708
2	map04974	Protein digestion and absorption	KEGG PATHWAY	2/77	95/11318	0.136445	0.367914	Organismal Systems	Digestive system	gene3981|gene19934	COL17A1;LOC106049424
2	map04620	Toll-like receptor signaling pathway	KEGG PATHWAY	2/77	94/11318	0.134137	0.368266	Organismal Systems	Immune system	gene3889|gene11333	IRF7;STAT1
2	map04713	Circadian entrainment	KEGG PATHWAY	2/77	103/11318	0.155214	0.37802	Organismal Systems	Environmental adaptation	gene8728|gene10183	GRIN1;LOC106038708
3	map04020	Calcium signaling pathway	KEGG PATHWAY	3/77	200/11318	0.155175	0.384122	Environmental Information Processing	Signal transduction	gene17154|gene8728|gene10183	EGFR;GRIN1;LOC106038708
3	map05170	Human immunodeficiency virus 1 infection	KEGG PATHWAY	3/77	196/11318	0.148731	0.387214	Human Diseases	Infectious disease: viral	gene20335|gene20642|gene10183	LOC106049856;TAP2;LOC106038708
2	map04625	C-type lectin receptor signaling pathway	KEGG PATHWAY	2/77	102/11318	0.15284	0.391167	Organismal Systems	Immune system	gene10183|gene11333	LOC106038708;STAT1
2	map04972	Pancreatic secretion	KEGG PATHWAY	2/77	102/11318	0.15284	0.391167	Organismal Systems	Digestive system	gene5948|gene19934	LOC106034001;LOC106049424
1	map04744	Phototransduction	KEGG PATHWAY	1/77	27/11318	0.168505	0.403877	Organismal Systems	Sensory system	gene10183	LOC106038708
1	map04745	Phototransduction - fly	KEGG PATHWAY	1/77	28/11318	0.174176	0.410946	Organismal Systems	Sensory system	gene10183	LOC106038708
2	map04071	Sphingolipid signaling pathway	KEGG PATHWAY	2/77	117/11318	0.189115	0.439329	Environmental Information Processing	Signal transduction	gene8160|gene7964	CERS3;SGPP2
1	map04960	Aldosterone-regulated sodium reabsorption	KEGG PATHWAY	1/77	34/11318	0.207406	0.447403	Organismal Systems	Excretory system	gene18522	SFN
1	map01040	Biosynthesis of unsaturated fatty acids	KEGG PATHWAY	1/77	32/11318	0.196478	0.449518	Metabolism	Lipid metabolism	gene1541	LOC106044856
2	map05034	Alcoholism	KEGG PATHWAY	2/77	124/11318	0.206435	0.451763	Human Diseases	Substance dependence	gene8728|gene10183	GRIN1;LOC106038708
2	map05162	Measles	KEGG PATHWAY	2/77	123/11318	0.203949	0.452887	Human Diseases	Infectious disease: viral	gene3889|gene11333	IRF7;STAT1
1	map05216	Thyroid cancer	KEGG PATHWAY	1/77	33/11318	0.20196	0.455164	Human Diseases	Cancer: specific types	gene17323	LOC106046592
2	map04371	Apelin signaling pathway	KEGG PATHWAY	2/77	130/11318	0.221416	0.470899	Environmental Information Processing	Signal transduction	gene17323|gene10183	LOC106046592;LOC106038708
2	map04621	NOD-like receptor signaling pathway	KEGG PATHWAY	2/77	138/11318	0.241526	0.506533	Organismal Systems	Immune system	gene3889|gene11333	IRF7;STAT1
2	map04514	Cell adhesion molecules (CAMs)	KEGG PATHWAY	2/77	141/11318	0.249093	0.515248	Environmental Information Processing	Signaling molecules and interaction	gene7500|gene17323	XG;LOC106046592
1	map05030	Cocaine addiction	KEGG PATHWAY	1/77	43/11318	0.254791	0.519911	Human Diseases	Substance dependence	gene8728	GRIN1
1	map04623	Cytosolic DNA-sensing pathway	KEGG PATHWAY	1/77	44/11318	0.25988	0.523225	Organismal Systems	Immune system	gene3889	IRF7
2	map05226	Gastric cancer	KEGG PATHWAY	2/77	150/11318	0.271834	0.526244	Human Diseases	Cancer: specific types	gene17154|gene17323	EGFR;LOC106046592
5	map05200	Pathways in cancer	KEGG PATHWAY	5/77	513/11318	0.270029	0.529537	Human Diseases	Cancer: overview	gene15178|gene10183|gene17154|gene17323|gene11333	PML;LOC106038708;EGFR;LOC106046592;STAT1
1	map05033	Nicotine addiction	KEGG PATHWAY	1/77	46/11318	0.269956	0.53636	Human Diseases	Substance dependence	gene8728	GRIN1
1	map04975	Fat digestion and absorption	KEGG PATHWAY	1/77	49/11318	0.284816	0.544396	Organismal Systems	Digestive system	gene12296	LOC106041043
2	map04145	Phagosome	KEGG PATHWAY	2/77	158/11318	0.292044	0.551232	Cellular Processes	Transport and catabolism	gene20335|gene20642	LOC106049856;TAP2
2	map05161	Hepatitis B	KEGG PATHWAY	2/77	162/11318	0.302128	0.556357	Human Diseases	Infectious disease: viral	gene3889|gene11333	IRF7;STAT1
1	map05014	Amyotrophic lateral sclerosis (ALS)	KEGG PATHWAY	1/77	52/11318	0.299378	0.5581	Human Diseases	Neurodegenerative disease	gene8728	GRIN1
2	map05152	Tuberculosis	KEGG PATHWAY	2/77	166/11318	0.31219	0.56796	Human Diseases	Infectious disease: bacterial	gene10183|gene11333	LOC106038708;STAT1
1	map05230	Central carbon metabolism in cancer	KEGG PATHWAY	1/77	58/11318	0.327629	0.588952	Human Diseases	Cancer: overview	gene17154	EGFR
1	map05321	Inflammatory bowel disease (IBD)	KEGG PATHWAY	1/77	60/11318	0.336794	0.598304	Human Diseases	Immune disease	gene11333	STAT1
1	map05223	Non-small cell lung cancer	KEGG PATHWAY	1/77	63/11318	0.35031	0.61508	Human Diseases	Cancer: specific types	gene17154	EGFR
2	map05202	Transcriptional misregulation in cancer	KEGG PATHWAY	2/77	188/11318	0.366877	0.629528	Human Diseases	Cancer: overview	gene15178|gene19016	PML;ETV7
1	map05133	Pertussis	KEGG PATHWAY	1/77	66/11318	0.363555	0.630997	Human Diseases	Infectious disease: bacterial	gene10183	LOC106038708
1	map05221	Acute myeloid leukemia	KEGG PATHWAY	1/77	69/11318	0.376533	0.638836	Human Diseases	Cancer: specific types	gene15178	PML
1	map04917	Prolactin signaling pathway	KEGG PATHWAY	1/77	72/11318	0.389249	0.638877	Organismal Systems	Endocrine system	gene11333	STAT1
1	map05140	Leishmaniasis	KEGG PATHWAY	1/77	70/11318	0.3808	0.638898	Human Diseases	Infectious disease: parasitic	gene11333	STAT1
1	map04971	Gastric acid secretion	KEGG PATHWAY	1/77	70/11318	0.3808	0.638898	Organismal Systems	Digestive system	gene10183	LOC106038708
1	map04391	Hippo signaling pathway - fly	KEGG PATHWAY	1/77	77/11318	0.409877	0.6655	Environmental Information Processing	Signal transduction	gene15756	TP63
1	map05120	Epithelial cell signaling in Helicobacter pylori infection	KEGG PATHWAY	1/77	79/11318	0.417935	0.671363	Human Diseases	Infectious disease: bacterial	gene17154	EGFR
2	map04024	cAMP signaling pathway	KEGG PATHWAY	2/77	215/11318	0.431639	0.671933	Environmental Information Processing	Signal transduction	gene8728|gene10183	GRIN1;LOC106038708
1	map04925	Aldosterone synthesis and secretion	KEGG PATHWAY	1/77	82/11318	0.429817	0.676067	Organismal Systems	Endocrine system	gene10183	LOC106038708
1	map04928	Parathyroid hormone synthesis, secretion and action	KEGG PATHWAY	1/77	94/11318	0.475	0.676651	Organismal Systems	Endocrine system	gene17154	EGFR
1	map05145	Toxoplasmosis	KEGG PATHWAY	1/77	107/11318	0.519965	0.676851	Human Diseases	Infectious disease: parasitic	gene11333	STAT1
1	map04659	Th17 cell differentiation	KEGG PATHWAY	1/77	107/11318	0.519965	0.676851	Organismal Systems	Immune system	gene11333	STAT1
1	map01521	EGFR tyrosine kinase inhibitor resistance	KEGG PATHWAY	1/77	81/11318	0.425883	0.67693	Human Diseases	Drug resistance: antineoplastic	gene17154	EGFR
1	map00561	Glycerolipid metabolism	KEGG PATHWAY	1/77	93/11318	0.471374	0.677881	Metabolism	Lipid metabolism	gene12296	LOC106041043
1	map04933	AGE-RAGE signaling pathway in diabetic complications	KEGG PATHWAY	1/77	102/11318	0.50314	0.67834	Human Diseases	Endocrine and metabolic disease	gene11333	STAT1
1	map04922	Glucagon signaling pathway	KEGG PATHWAY	1/77	97/11318	0.485732	0.679126	Organismal Systems	Endocrine system	gene10183	LOC106038708
2	map05131	Shigellosis	KEGG PATHWAY	2/77	237/11318	0.481801	0.679925	Human Diseases	Infectious disease: bacterial	gene17154|gene11717	EGFR;LOC106040409
1	map01522	Endocrine resistance	KEGG PATHWAY	1/77	85/11318	0.441461	0.68021	Human Diseases	Drug resistance: antineoplastic	gene17154	EGFR
1	map05210	Colorectal cancer	KEGG PATHWAY	1/77	91/11318	0.464047	0.680303	Human Diseases	Cancer: specific types	gene17154	EGFR
1	map04540	Gap junction	KEGG PATHWAY	1/77	91/11318	0.464047	0.680303	Cellular Processes	Cellular community - eukaryotes	gene17154	EGFR
1	map04380	Osteoclast differentiation	KEGG PATHWAY	1/77	104/11318	0.509939	0.681423	Organismal Systems	Development and regeneration	gene11333	STAT1
1	map04114	Oocyte meiosis	KEGG PATHWAY	1/77	104/11318	0.509939	0.681423	Cellular Processes	Cell growth and death	gene10183	LOC106038708
1	map04066	HIF-1 signaling pathway	KEGG PATHWAY	1/77	104/11318	0.509939	0.681423	Environmental Information Processing	Signal transduction	gene17154	EGFR
1	map04012	ErbB signaling pathway	KEGG PATHWAY	1/77	89/11318	0.45662	0.68267	Environmental Information Processing	Signal transduction	gene17154	EGFR
1	map05100	Bacterial invasion of epithelial cells	KEGG PATHWAY	1/77	89/11318	0.45662	0.68267	Human Diseases	Infectious disease: bacterial	gene17323	LOC106046592
1	map04610	Complement and coagulation cascades	KEGG PATHWAY	1/77	88/11318	0.452869	0.683832	Organismal Systems	Immune system	gene11570	MASP2
1	map04658	Th1 and Th2 cell differentiation	KEGG PATHWAY	1/77	87/11318	0.449092	0.684979	Organismal Systems	Immune system	gene11333	STAT1
1	map04916	Melanogenesis	KEGG PATHWAY	1/77	101/11318	0.499705	0.685959	Organismal Systems	Endocrine system	gene10183	LOC106038708
1	map05215	Prostate cancer	KEGG PATHWAY	1/77	101/11318	0.499705	0.685959	Human Diseases	Cancer: specific types	gene17154	EGFR
1	map04722	Neurotrophin signaling pathway	KEGG PATHWAY	1/77	114/11318	0.54258	0.688484	Organismal Systems	Nervous system	gene10183	LOC106038708
2	map04144	Endocytosis	KEGG PATHWAY	2/77	244/11318	0.4972	0.688782	Cellular Processes	Transport and catabolism	gene15178|gene17154	PML;EGFR
1	map04728	Dopaminergic synapse	KEGG PATHWAY	1/77	113/11318	0.539415	0.690268	Organismal Systems	Nervous system	gene10183	LOC106038708
1	map04926	Relaxin signaling pathway	KEGG PATHWAY	1/77	118/11318	0.555027	0.698409	Organismal Systems	Endocrine system	gene17154	EGFR
1	map04670	Leukocyte transendothelial migration	KEGG PATHWAY	1/77	120/11318	0.561125	0.700247	Organismal Systems	Immune system	gene7500	XG
2	map05010	Alzheimer disease	KEGG PATHWAY	2/77	308/11318	0.624053	0.713879	Human Diseases	Neurodegenerative disease	gene8728|gene10183	GRIN1;LOC106038708
1	map04261	Adrenergic signaling in cardiomyocytes	KEGG PATHWAY	1/77	132/11318	0.596016	0.714274	Organismal Systems	Circulatory system	gene10183	LOC106038708
1	map04934	Cushing syndrome	KEGG PATHWAY	1/77	152/11318	0.648184	0.714422	Human Diseases	Endocrine and metabolic disease	gene17154	EGFR
1	map05225	Hepatocellular carcinoma	KEGG PATHWAY	1/77	154/11318	0.65302	0.714536	Human Diseases	Cancer: specific types	gene17154	EGFR
1	map04740	Olfactory transduction	KEGG PATHWAY	1/77	156/11318	0.65779	0.714577	Organismal Systems	Sensory system	gene10183	LOC106038708
1	map04140	Autophagy - animal	KEGG PATHWAY	1/77	126/11318	0.578927	0.716541	Cellular Processes	Transport and catabolism	gene12086	LOC106040774
2	map05165	Human papillomavirus infection	KEGG PATHWAY	2/77	321/11318	0.646648	0.717969	Human Diseases	Infectious disease: viral	gene17154|gene11333	EGFR;STAT1
1	map05418	Fluid shear stress and atherosclerosis	KEGG PATHWAY	1/77	136/11318	0.607027	0.721741	Human Diseases	Cardiovascular disease	gene10183	LOC106038708
1	map04218	Cellular senescence	KEGG PATHWAY	1/77	149/11318	0.640806	0.722102	Cellular Processes	Cell growth and death	gene10183	LOC106038708
1	map05224	Breast cancer	KEGG PATHWAY	1/77	149/11318	0.640806	0.722102	Human Diseases	Cancer: specific types	gene17154	EGFR
1	map04142	Lysosome	KEGG PATHWAY	1/77	131/11318	0.593217	0.722385	Cellular Processes	Transport and catabolism	gene19078	LOC106048496
1	map04919	Thyroid hormone signaling pathway	KEGG PATHWAY	1/77	131/11318	0.593217	0.722385	Organismal Systems	Endocrine system	gene11333	STAT1
1	map04550	Signaling pathways regulating pluripotency of stem cells	KEGG PATHWAY	1/77	140/11318	0.617741	0.723093	Cellular Processes	Cellular community - eukaryotes	gene16449	OTX1
1	map04068	FoxO signaling pathway	KEGG PATHWAY	1/77	140/11318	0.617741	0.723093	Environmental Information Processing	Signal transduction	gene17154	EGFR
1	map04120	Ubiquitin mediated proteolysis	KEGG PATHWAY	1/77	140/11318	0.617741	0.723093	Genetic Information Processing	Folding, sorting and degradation	gene15178	PML
1	map04150	mTOR signaling pathway	KEGG PATHWAY	1/77	148/11318	0.638312	0.7247	Environmental Information Processing	Signal transduction	gene12086	LOC106040774
1	map04110	Cell cycle	KEGG PATHWAY	1/77	130/11318	0.590398	0.724797	Cellular Processes	Cell growth and death	gene18522	SFN
1	map04910	Insulin signaling pathway	KEGG PATHWAY	1/77	139/11318	0.61509	0.725614	Organismal Systems	Endocrine system	gene10183	LOC106038708
1	map04022	cGMP-PKG signaling pathway	KEGG PATHWAY	1/77	167/11318	0.682891	0.726173	Environmental Information Processing	Signal transduction	gene10183	LOC106038708
1	map04062	Chemokine signaling pathway	KEGG PATHWAY	1/77	163/11318	0.673981	0.726937	Organismal Systems	Immune system	gene11333	STAT1
1	map04390	Hippo signaling pathway	KEGG PATHWAY	1/77	166/11318	0.680686	0.728962	Environmental Information Processing	Signal transduction	gene17323	LOC106046592
2	map04080	Neuroactive ligand-receptor interaction	KEGG PATHWAY	2/77	357/11318	0.703699	0.743067	Environmental Information Processing	Signaling molecules and interaction	gene19934|gene8728	LOC106049424;GRIN1
1	map05203	Viral carcinogenesis	KEGG PATHWAY	1/77	181/11318	0.712225	0.746847	Human Diseases	Cancer: overview	gene3889	IRF7
1	map04060	Cytokine-cytokine receptor interaction	KEGG PATHWAY	1/77	205/11318	0.756407	0.787707	Environmental Information Processing	Signaling molecules and interaction	gene9415	IL22RA1
1	map03013	RNA transport	KEGG PATHWAY	1/77	222/11318	0.783582	0.799465	Genetic Information Processing	Translation	gene16579	GEMIN4
1	map04810	Regulation of actin cytoskeleton	KEGG PATHWAY	1/77	216/11318	0.774351	0.80087	Cellular Processes	Cell motility	gene17154	EGFR
1	map04510	Focal adhesion	KEGG PATHWAY	1/77	220/11318	0.780547	0.801786	Cellular Processes	Cellular community - eukaryotes	gene17154	EGFR
1	map05205	Proteoglycans in cancer	KEGG PATHWAY	1/77	229/11318	0.793881	0.804537	Human Diseases	Cancer: overview	gene17154	EGFR
1	map05016	Huntington disease	KEGG PATHWAY	1/77	255/11318	0.828071	0.833592	Human Diseases	Neurodegenerative disease	gene8728	GRIN1
1	map04151	PI3K-Akt signaling pathway	KEGG PATHWAY	1/77	339/11318	0.904592	0.904592	Environmental Information Processing	Signal transduction	gene17154	EGFR
