# Supplementary material for: Transcriptome Profiling Unveils Key Genes Regulating the Growth and Development of Yangzhou Goose Knob
Source: Int J Mol Sci. 2024 Apr 10;25(8):4166. doi: 10.3390/ijms25084166 (PMC11050116; doi:10.3390/ijms25084166)
Supplement: Supplementary file 1 [file ijms-25-04166-s001.zip › Table S9.xlsx]

## Sheet: Table S11
Table S9 The final core genes
gene id	gene name	module	cor	DEGs	Time series analysis candidate genes
gene10002	SAMD12	blue	0.92478	SLC38A26	ADRA2A
gene10052	TMEM164	turquoise	0.95782	SLC38A25	ERRFI1
gene10056	ACSL4	yellow	0.98359	ANXA8L156	MSX1
gene10057	NXT2	turquoise	0.90091	WNT11	CYR61
gene10067	LOC106038552	turquoise	0.9681	HPSE272	TNMD
gene1007	PHLDB2	blue	0.92382	WNT4	STC1
gene10076	TENM1	yellow	0.90281	WNT7A	WNT2B
gene10078	SH2D1A	turquoise	0.94836	WNT10A	SPRY1
gene10080	XIAP	turquoise	0.95289	TCF7L2	LOC106047235
gene10093	LOC106038686	brown	0.92485	WNT2B	CD109
gene10098	MAD2L1	turquoise	0.95478	GATA3	TFCP2L1
gene10117	NDST4	turquoise	0.9	FZD1	ACVR2A
gene10119	UGT8	yellow	0.97347	WNT3A	HGF
gene1014	LOC106039358	turquoise	0.9284	BCL9	ANXA1
gene10142	ELOVL6	green	0.93059	ADRA2A	HSPB1
gene10159	LEF1	turquoise	0.96557	VPS25	SFN
gene10168	TMEM209	turquoise	0.94812	CASP3	ANXA8L156
gene1017	BTLA	turquoise	0.91401	ANXA1	CEP5552
gene10182	ASB13	turquoise	0.9065	SLC35G138	KDF1
gene10183	LOC106038708	green	0.97385	FGF7	CASP3
gene10212	LOC106038726	yellow	0.92436	NOTCH2	EVPL
gene10220	PRKCQ	turquoise	0.90168	SFN
gene10225	ITIH5	brown	0.93383	PPRC191
gene10230	GATA3	turquoise	0.9443	PRKD1
gene10243	LOC106038813	blue	0.95227	CEP5570
gene10247	BAZ1A	yellow	0.96456	KDF1
gene10250	PPP2R3C	turquoise	0.93009	ERRFI1
gene10291	AREL1	turquoise	0.95144
gene1031	NSUN3	brown	0.91299
gene10317	ANGEL1	brown	0.93047
gene10348	INSIG1	brown	0.90132
gene10366	NCAPG2	turquoise	0.94108
gene10394	FGFR2	green	0.90364
gene1040	EPHA6	blue	0.92597
gene10429	TEX36	blue	0.92267
gene1044	MINA	brown	0.96256
gene10440	DOCK1	blue	0.90986
gene10446	PTPRE	turquoise	0.91346
gene10447	MKI67	turquoise	0.91186
gene10476	LOC106039065	green	0.93453
gene10479	LYN	turquoise	0.96095
gene10493	FAM110B	brown	0.95555
gene10505	CHD7	yellow	0.9058
gene10548	LOC106039127	turquoise	0.95845
gene10563	TMEM156	turquoise	0.96845
gene10569	LIAS	brown	0.93443
gene10570	UGDH	yellow	0.936
gene10577	RHOH	turquoise	0.92525
gene10593	VPS8	brown	0.94604
gene10595	EHHADH	brown	0.95577
gene1062	LOC106039877	turquoise	0.92941
gene10620	SENP2	turquoise	0.91581
gene10624	SLCO2A1	yellow	0.93876
gene1063	CD2	turquoise	0.96026
gene1064	PTGFRN	blue	0.90986
gene10658	45537	turquoise	0.90536
gene10674	ARHGEF4	brown	0.96095
gene10682	KLHL6	turquoise	0.93585
gene10693	LOC106039183	blue	0.91244
gene10701	BDH1	turquoise	0.95619
gene10723	HRASLS	brown	0.92313
gene10735	CXCR4	turquoise	0.90793
gene10737	MCM6	turquoise	0.97352
gene10747	ACMSD	turquoise	0.94476
gene10748	TMEM163	turquoise	0.92877
gene10756	SLC35F5	brown	0.94224
gene10772	MARCO	turquoise	0.94402
gene10780	CEP70	yellow	0.90371
gene10782	PARP9	green	0.93488
gene10796	WNT10A	green	0.93361
gene10810	USP37	turquoise	0.92696
gene10813	RNPC3	turquoise	0.90532
gene10823	LOC106039415	brown	0.92653
gene10839	LOC106039479	green	0.94248
gene10846	LOC106039426	brown	0.91909
gene10861	SLC44A3	brown	0.94138
gene10862	F3	green	0.93273
gene10889	GLMN	turquoise	0.92165
gene109	HECTD2	yellow	0.93326
gene10940	LOC106039544	blue	0.94065
gene10945	MAP3K4	turquoise	0.90266
gene10970	ADCY7	turquoise	0.94336
gene10996	MYLK3	yellow	0.96046
gene11000	SHCBP1	turquoise	0.94279
gene11034	LOC106039631	yellow	0.9137
gene11091	LOC106039689	green	0.94888
gene11108	CLMP	blue	0.92717
gene11114	LOC106039708	blue	0.96153
gene11127	LOC106039711	yellow	0.96629
gene11128	TRIM29	green	0.96509
gene11130	PVRL1	green	0.94277
gene11135	C1QTNF5	blue	0.91811
gene11139	PDZD3	turquoise	0.95161
gene11164	DIXDC1	brown	0.93819
gene11169	IL18	yellow	0.933
gene11181	ANKK1	green	0.96329
gene11187	MPZL2	green	0.92569
gene11193	IL10RA	turquoise	0.92443
gene11194	TMPRSS13	green	0.92231
gene11232	SLC37A4	turquoise	0.90334
gene11235	CCDC84	turquoise	0.9293
gene11247	TMEM126A	brown	0.97065
gene11254	EED	yellow	0.92946
gene11315	RNF152	brown	0.94047
gene11327	SERPINB5	green	0.96853
gene1133	SAMSN1	turquoise	0.90913
gene11333	STAT1	green	0.95787
gene11335	STAT4	turquoise	0.95887
gene11341	TMEFF2	blue	0.92936
gene11358	COQ10B	blue	0.90063
gene11374	LOC106040021	turquoise	0.90729
gene11383	CLK1	turquoise	0.981
gene114	KIF20B	turquoise	0.91934
gene11404	ATG7	brown	0.92472
gene11407	SYN2	blue	0.96321
gene11426	IQSEC1	blue	0.92533
gene11462	ZBTB17	turquoise	0.90336
gene11472	ATP13A2	turquoise	0.94153
gene11513	LOC106040243	blue	0.92115
gene11525	FHAD1	yellow	0.9003
gene11526	TMEM51	green	0.93577
gene11539	LOC106040189	green	0.92523
gene1157	STK4	turquoise	0.95658
gene11570	MASP2	green	0.986
gene11576	DDX58	green	0.93876
gene11581	TSTD2	turquoise	0.94503
gene11625	LOC106040256	yellow	0.96507
gene1164	LOC106041081	turquoise	0.94516
gene11647	HS6ST1	blue	0.92406
gene11669	INPP5D	turquoise	0.97657
gene1168	PKIG	yellow	0.90269
gene11687	TNFRSF19	brown	0.91687
gene1169	TTPAL	turquoise	0.92879
gene11690	SGCG	blue	0.93111
gene11706	SKA3	turquoise	0.94351
gene11714	IFT88	blue	0.90692
gene11716	LOC106040406	green	0.98478
gene11717	LOC106040409	green	0.98205
gene11720	PSPC1	turquoise	0.93865
gene11727	FDX1	turquoise	0.90611
gene11741	LMNB1	turquoise	0.95709
gene11749	ZNF462	brown	0.9095
gene11756	FSD1L	turquoise	0.96542
gene11770	THAP1	turquoise	0.92733
gene11773	IDUA	brown	0.90971
gene11778	TMEM175	brown	0.95128
gene11805	IL17REL	turquoise	0.92107
gene11812	PIM3	yellow	0.95868
gene11832	ANOS1	brown	0.90678
gene1187	EYA2	blue	0.92211
gene11894	ETS1	turquoise	0.92725
gene11929	NCAPD3	turquoise	0.92035
gene11932	ACAD8	turquoise	0.91531
gene11943	LOC106040633	turquoise	0.92204
gene11951	PPP1R26	turquoise	0.94837
gene11955	AGPAT2	green	0.93164
gene11966	GPSM1	turquoise	0.93213
gene11972	LOC106040742	green	0.928
gene11981	PHF19	yellow	0.98802
gene11982	LOC106040729	yellow	0.92147
gene11983	TRAF1	turquoise	0.92058
gene11985	CNTRL	turquoise	0.94148
gene11994	MORN5	turquoise	0.90604
gene1201	LOC106040595	blue	0.92874
gene12027	HSPA5	yellow	0.91621
gene12028	GAPVD1	turquoise	0.92371
gene12033	MVB12B	turquoise	0.95489
gene1204	B4GALT5	yellow	0.95357
gene12041	LOC106040672	turquoise	0.97582
gene12049	LOC106040763	turquoise	0.92924
gene12051	HELZ2	green	0.95923
gene12052	LOC106040764	green	0.94913
gene12056	TNFRSF6B	yellow	0.96232
gene12063	UCKL1	turquoise	0.92884
gene12069	RGS19	turquoise	0.93624
gene12086	LOC106040774	green	0.99075
gene1209	SNAI1	yellow	0.91163
gene12101	OGFR	green	0.94291
gene12122	TAF4	turquoise	0.98471
gene12131	EDN3	green	0.93642
gene12140	TEAD1	blue	0.9007
gene12142	MICALCL	yellow	0.91797
gene1215	FAM65C	blue	0.90807
gene12177	TRIM66	turquoise	0.94052
gene12184	TUB	brown	0.95714
gene12185	RIC3	blue	0.93396
gene12192	PDE3B	turquoise	0.93313
gene12205	SDC4	yellow	0.95966
gene12216	NOCT	yellow	0.90498
gene12254	ARHGAP15	turquoise	0.91949
gene1226	LOC106041591	yellow	0.91792
gene12273	VPS37D	turquoise	0.93221
gene12289	LOC106041087	yellow	0.92451
gene12290	LOC106041041	yellow	0.94742
gene12291	LOC106041042	yellow	0.90181
gene12296	LOC106041043	green	0.95026
gene123	FAS	turquoise	0.94873
gene12339	NCF1	turquoise	0.92168
gene12341	GTF2I	brown	0.95004
gene12351	RASL11A	turquoise	0.93588
gene12372	LOC106041153	blue	0.91551
gene12378	USPL1	turquoise	0.93377
gene12380	ALOX5AP	yellow	0.90333
gene12450	BFAR	turquoise	0.90465
gene12494	BCL2L15	green	0.92675
gene12495	PTPN22	turquoise	0.96835
gene12504	PPM1J	turquoise	0.95007
gene12506	MOV10	green	0.9663
gene12524	LOC106041346	green	0.97024
gene12527	IRF6	green	0.93815
gene12528	LOC106041272	brown	0.90547
gene12556	RASSF5	turquoise	0.96221
gene12557	IKBKE	turquoise	0.94072
gene12560	FAM72A	turquoise	0.90198
gene12569	PM20D1	brown	0.96935
gene12590	PPP1R15B	yellow	0.94667
gene12596	DPH1	yellow	0.94548
gene12602	WDR81	yellow	0.95844
gene1261	AURKA	turquoise	0.94994
gene12619	KCTD7	turquoise	0.91758
gene1262	CSTF1	turquoise	0.95218
gene1263	CASS4	yellow	0.90055
gene12643	RFFL	turquoise	0.94969
gene12651	RASL10B	brown	0.9381
gene12662	YWHAG	yellow	0.92124
gene12665	LOC106041406	yellow	0.93867
gene12669	ORAI2	turquoise	0.92269
gene12680	COL26A1	blue	0.91642
gene12686	RPAIN	green	0.91259
gene127	ANKRD22	yellow	0.92175
gene12700	LOC106041486	turquoise	0.90796
gene12718	SLC6A15	green	0.94611
gene12749	RGS18	turquoise	0.93776
gene12760	UAP1	yellow	0.91264
gene12788	LOC106041570	yellow	0.91864
gene12792	SUCO	turquoise	0.90567
gene12795	DNM3	blue	0.95752
gene12812	METTL18	turquoise	0.90128
gene12814	LOC106041602	yellow	0.96983
gene12821	GCC2	brown	0.9039
gene12849	MFSD9	brown	0.94625
gene12853	IL18R1	turquoise	0.95283
gene12856	LOC106041678	green	0.93999
gene12861	CREG2	brown	0.95637
gene1292	APCDD1L	blue	0.9064
gene12929	LOC106041754	turquoise	0.96347
gene12943	SAP30	green	0.93494
gene12997	CX3CR1	turquoise	0.90658
gene13003	UBP1	turquoise	0.94153
gene13027	HPSE	turquoise	0.93
gene1304	ZNF831	turquoise	0.91916
gene13041	LOC106041941	turquoise	0.9031
gene13046	KLHL8	turquoise	0.9729
gene13058	PKD2	blue	0.9352
gene13078	AREG	yellow	0.9637
gene1308	LOC106042281	blue	0.92513
gene13085	LOC106041918	yellow	0.92883
gene13111	PRPF38B	yellow	0.94013
gene13120	KIF14	turquoise	0.91769
gene13131	PTPRC	turquoise	0.96053
gene13143	ASPM	turquoise	0.90602
gene13146	NAMPT	yellow	0.91813
gene1315	MAP3K9	turquoise	0.91892
gene13169	KIF21A	brown	0.95129
gene13175	GTSE1	turquoise	0.94514
gene13178	LOC106042035	brown	0.90112
gene13196	FOXP2	blue	0.93447
gene13202	TES	yellow	0.94658
gene13263	NYX	yellow	0.92423
gene13287	LOC106042158	turquoise	0.94336
gene13288	LOC106042157	turquoise	0.96899
gene13310	TOP1MT	turquoise	0.93224
gene13313	LOC106042183	green	0.95327
gene1335	LOC106040700	turquoise	0.95362
gene13395	ANAPC1	turquoise	0.93011
gene13398	BUB1	turquoise	0.90327
gene13402	ASB3	turquoise	0.91644
gene1341	PTGR2	brown	0.9803
gene13485	CHRDL2	brown	0.9018
gene13528	ACER3	blue	0.94093
gene13549	FAT4	blue	0.92927
gene13559	SPRY1	yellow	0.92221
gene1356	PLA2G4F	green	0.93007
gene13561	NUDT6	blue	0.94474
gene13572	TRPC3	yellow	0.90539
gene13573	BBS7	blue	0.94578
gene13574	CCNA2	turquoise	0.94519
gene1358	LOC106042968	green	0.97181
gene1359	LOC106042978	green	0.9694
gene13591	LAMC2	green	0.92532
gene1361	LOC106043002	green	0.9128
gene1362	LOC106042972	green	0.96555
gene13696	CARS	yellow	0.92281
gene13699	PHLDA2	yellow	0.94511
gene13710	TSPAN32	yellow	0.90043
gene1372	MGA	turquoise	0.92546
gene13726	LOC106042626	turquoise	0.90398
gene1375	RPAP1	turquoise	0.9049
gene13750	ARHGAP12	brown	0.90873
gene13751	ZEB1	blue	0.95183
gene13772	LOC106042683	turquoise	0.94238
gene13777	MKX	blue	0.90442
gene13792	UTP23	green	0.91102
gene138	ERCC6	turquoise	0.94208
gene13800	TRPS1	yellow	0.92075
gene1382	NUSAP1	turquoise	0.9248
gene13850	SH3PXD2B	blue	0.95284
gene13852	DUSP1	yellow	0.96017
gene1386	EXD1	brown	0.91809
gene13864	MSX2	yellow	0.91313
gene13873	RGS14	turquoise	0.91268
gene13875	GRK6	turquoise	0.93448
gene13882	DUSP7	yellow	0.93282
gene13896	NEK4	blue	0.90543
gene13902	SFMBT1	turquoise	0.90757
gene13910	PRKCD	turquoise	0.91309
gene13911	LOC106042848	brown	0.96172
gene13916	LOC106042836	turquoise	0.96636
gene13918	HEMK1	turquoise	0.96716
gene13920	CISH	yellow	0.92951
gene13934	RBM5	turquoise	0.96885
gene1394	RHOV	green	0.95707
gene13974	LOC106042900	turquoise	0.95179
gene13981	STK17A	turquoise	0.91713
gene13994	LOC106042924	turquoise	0.94068
gene14021	DOCK8	turquoise	0.96155
gene14041	LOC106043005	turquoise	0.96465
gene14042	INPPL1	turquoise	0.95119
gene14046	KIF4A	turquoise	0.94565
gene14051	LOC106042984	yellow	0.94161
gene14052	LPAR4	blue	0.96615
gene14053	LOC106042993	turquoise	0.90558
gene14055	GPR174	turquoise	0.94506
gene14075	LOC106042970	turquoise	0.96281
gene14080	POF1B	green	0.93022
gene14139	CBFB	yellow	0.96105
gene14141	B3GNT9	blue	0.94949
gene14167	ESRP2	green	0.98153
gene1417	DGKZ	turquoise	0.98191
gene14179	LOC106043072	turquoise	0.91338
gene14180	LOC106043079	green	0.93133
gene14183	MMP2	blue	0.92678
gene14185	LOC106043083	blue	0.95146
gene14201	EPCAM	green	0.9426
gene14223	LOC106043205	turquoise	0.94011
gene14255	CPXM1	blue	0.90647
gene14267	LOC106043193	turquoise	0.98192
gene14274	DOK1	turquoise	0.98009
gene14276	NBEA	blue	0.98096
gene14279	MAB21L1	blue	0.90536
gene14336	CDHR3	brown	0.90129
gene14354	ANO10	blue	0.91698
gene14384	BCL2A1	turquoise	0.98242
gene1439	SPI1	turquoise	0.93503
gene14394	MESDC1	yellow	0.9247
gene14409	LOC106043362	brown	0.90351
gene14442	RCAN1	yellow	0.92667
gene14450	SLC5A3	turquoise	0.94276
gene14477	MIS18A	turquoise	0.94563
gene145	WDFY4	turquoise	0.95283
gene14527	PLCG1	turquoise	0.909
gene14542	SPTSSB	green	0.97639
gene14551	TRIM59	turquoise	0.90784
gene14604	PDE4B	yellow	0.90901
gene14611	IL23R	yellow	0.908
gene14628	LOC106043611	blue	0.90852
gene14638	ERICH3	brown	0.92709
gene14658	UACA	blue	0.96797
gene14662	KIF23	turquoise	0.9413
gene1467	ALKBH3	brown	0.90129
gene14670	ITGA11	blue	0.94767
gene14690	TIPIN	turquoise	0.967
gene14695	DENND4A	yellow	0.92581
gene14740	LOC106043729	turquoise	0.91693
gene14753	NUDT12	blue	0.90105
gene14760	SLCO4C1	yellow	0.97041
gene14766	RGMB	turquoise	0.92124
gene14772	FAM64A	turquoise	0.90385
gene14774	KIAA0753	turquoise	0.92597
gene14784	RAP1GAP2	turquoise	0.91979
gene14831	PSIP1	turquoise	0.96389
gene14832	SNAPC3	turquoise	0.91668
gene14856	IRF4	turquoise	0.94604
gene14888	CYTIP	turquoise	0.909
gene14895	NR4A2	yellow	0.92858
gene14911	CHEK2	turquoise	0.91096
gene14924	CLN5	brown	0.958
gene1496	CD44	yellow	0.94077
gene14962	MOB1B	yellow	0.99187
gene14963	DCK	turquoise	0.95073
gene1497	LOC106044451	yellow	0.9651
gene15033	GCH1	yellow	0.95825
gene1504	CAT	brown	0.93909
gene15045	GNPNAT1	yellow	0.92179
gene15067	FAM78A	turquoise	0.95608
gene15079	NTNG2	blue	0.91961
gene15099	MED22	turquoise	0.92994
gene1511	LOC106044604	brown	0.92077
gene15149	OSTF1	turquoise	0.92771
gene15161	PSTPIP1	turquoise	0.95652
gene15178	PML	green	0.9625
gene1520	ANO1	yellow	0.94994
gene15219	BBS4	brown	0.92835
gene15223	CELF6	green	0.90344
gene15226	DYNLT1	turquoise	0.92389
gene15230	TAGAP	turquoise	0.91833
gene15231	RSPH3	brown	0.91928
gene15243	ADGRG6	turquoise	0.90648
gene15257	TNFRSF18	turquoise	0.90822
gene15258	LOC106044313	turquoise	0.91846
gene15263	LOC106044308	turquoise	0.9056
gene15277	H6PD	green	0.90374
gene15278	SPSB1	yellow	0.91645
gene15287	NMNAT1	turquoise	0.93245
gene15290	UBE4B	turquoise	0.93735
gene15295	PEX14	brown	0.96258
gene15297	CASZ1	yellow	0.90795
gene15302	KIAA0895	blue	0.92244
gene15308	GPR141	turquoise	0.92312
gene15320	PHACTR1	blue	0.96678
gene15338	PLAT	brown	0.90246
gene15363	DDHD2	brown	0.90114
gene15389	TTI2	turquoise	0.94202
gene1541	LOC106044856	green	0.95681
gene15411	ING1	turquoise	0.90539
gene15435	TMEM2	yellow	0.98068
gene15451	LOC106044496	brown	0.93619
gene15475	CPED1	brown	0.90317
gene15527	FAM120B	brown	0.93314
gene15550	MXRA8	blue	0.91863
gene15556	VWA1	yellow	0.91423
gene15618	APLF	brown	0.90658
gene15620	PLEK	turquoise	0.90689
gene15624	WDR92	turquoise	0.96626
gene15628	ETAA1	brown	0.90285
gene15635	MEIS1	blue	0.91908
gene15645	SLC1A4	turquoise	0.9647
gene1565	LOC106045810	blue	0.94557
gene1566	LOC106045814	blue	0.97406
gene15688	MGME1	turquoise	0.92081
gene15689	OVOL2	green	0.96813
gene157	ANXA8L1	green	0.95698
gene15705	LOC106044797	green	0.96389
gene15729	HTR2B	yellow	0.95573
gene15751	BCL6	turquoise	0.97368
gene15756	TP63	green	0.96855
gene15768	CDH13	blue	0.90174
gene15781	TLDC1	blue	0.94947
gene158	LOC106048153	brown	0.92106
gene1581	LOC106045886	blue	0.93941
gene1583	LOC106045096	blue	0.92563
gene15833	ATP8B1	green	0.95728
gene15837	ZNF532	blue	0.93196
gene15847	MAST3	yellow	0.96667
gene15852	LOC106045009	yellow	0.91507
gene15857	HAUS8	turquoise	0.90715
gene15871	KLF2	yellow	0.95698
gene15892	LOC106044971	turquoise	0.9211
gene15910	PIAS4	turquoise	0.92358
gene15923	LOC106044958	green	0.94389
gene15933	CCDC127	blue	0.91402
gene15956	PLXNB1	green	0.90941
gene15968	TMEM43	blue	0.91164
gene15977	SLC41A3	brown	0.97577
gene16003	DIRAS2	green	0.90382
gene16004	SYK	turquoise	0.95937
gene16015	CDC42SE2	turquoise	0.96778
gene16082	LOC106045189	blue	0.95817
gene16085	DNAI1	blue	0.95362
gene16111	RAB11FIP2	blue	0.98679
gene1614	SERHL2	brown	0.9437
gene16174	LOC106045305	yellow	0.96842
gene16176	CREM	yellow	0.94039
gene16183	PARD3	blue	0.97464
gene16188	NFKB1	yellow	0.91731
gene16220	DKK2	turquoise	0.96943
gene16232	LOC106045365	turquoise	0.93159
gene16254	RMI1	turquoise	0.90091
gene16264	FAM83C	green	0.94984
gene16269	LOC106045430	turquoise	0.96216
gene16284	LOC106045415	turquoise	0.95424
gene16286	SAMHD1	green	0.92269
gene16296	LOC106045440	turquoise	0.91889
gene16298	EPB41L1	brown	0.92291
gene16327	PYROXD1	blue	0.93222
gene16335	NOBOX	yellow	0.91289
gene16336	CD9	yellow	0.95425
gene16345	KBTBD2	turquoise	0.95385
gene16381	DTX1	turquoise	0.92213
gene16393	AR	blue	0.92577
gene16397	HEPH	blue	0.92949
gene16406	LOC106045559	turquoise	0.93569
gene16411	ZC4H2	brown	0.93438
gene16426	LOC106045611	turquoise	0.94469
gene16438	CHGB	yellow	0.91985
gene16439	TRMT6	turquoise	0.94345
gene16449	OTX1	green	0.97512
gene16453	VPS54	turquoise	0.92131
gene1647	RANGAP1	turquoise	0.94815
gene16487	LOC106045683	turquoise	0.94761
gene16499	FZR1	turquoise	0.91234
gene16506	MBD3	turquoise	0.93597
gene16512	REXO1	turquoise	0.93565
gene16515	LOC106045650	green	0.90019
gene16517	CSNK1G2	turquoise	0.94084
gene16522	DOT1L	yellow	0.91974
gene16533	WARS2	brown	0.94543
gene16534	TBX15	blue	0.94171
gene16535	SPAG17	blue	0.90549
gene16539	FAM46C	turquoise	0.92443
gene16540	DUSP12	turquoise	0.9633
gene16546	TRIM45	blue	0.9073
gene16548	CTC1	turquoise	0.97014
gene16553	GTF2E1	brown	0.90724
gene16565	SMG8	turquoise	0.96011
gene16579	GEMIN4	green	0.96049
gene16602	GSG2	turquoise	0.92948
gene16608	ZSWIM7	yellow	0.92508
gene16609	ADORA2B	yellow	0.94212
gene16645	CCND3	turquoise	0.91634
gene16654	MDFI	brown	0.96999
gene16660	DENND2D	turquoise	0.93151
gene16667	LOC106045877	turquoise	0.9023
gene16670	PKP1	green	0.96948
gene16672	LAD1	green	0.96977
gene16682	IPO9	brown	0.93145
gene16692	LOC106045913	yellow	0.92138
gene16708	PECR	brown	0.97798
gene16709	TMEM169	brown	0.91181
gene1671	E2F7	turquoise	0.95829
gene16744	STRADA	turquoise	0.969
gene16746	LIMD2	turquoise	0.95161
gene16758	MRC2	blue	0.92181
gene16763	ITGB3	yellow	0.93275
gene16782	LOC106045971	turquoise	0.92849
gene16801	PRKCB	turquoise	0.90811
gene16810	PLK1	turquoise	0.93542
gene16813	EARS2	turquoise	0.92974
gene16828	KDM8	turquoise	0.91008
gene16829	NSMCE1	yellow	0.97764
gene16831	IL21R	turquoise	0.91592
gene1684	CAPS2	blue	0.9167
gene16847	LOC106046070	green	0.93937
gene16888	LOC106046187	green	0.92555
gene16891	CEPT1	turquoise	0.9191
gene16893	NFYA	turquoise	0.90559
gene16923	ZNF76	turquoise	0.96298
gene16925	PPARD	yellow	0.92724
gene16927	FANCE	turquoise	0.93782
gene16929	SMPD2	turquoise	0.95434
gene16940	MAPK13	green	0.93442
gene16946	LOC106046136	yellow	0.93696
gene16951	LOC106046139	turquoise	0.91992
gene16955	LOC106046186	turquoise	0.90014
gene16969	PHYH	brown	0.92982
gene16992	CSNK1G3	blue	0.90487
gene17035	LOC106046248	turquoise	0.90783
gene17036	MXD1	yellow	0.99058
gene17051	LOC106046304	brown	0.90154
gene17056	LOC106046301	turquoise	0.92653
gene17136	LOC106046390	turquoise	0.91878
gene17154	EGFR	green	0.97142
gene17170	F10	yellow	0.92372
gene17182	TMCO3	blue	0.90854
gene17183	TFDP1	turquoise	0.95849
gene17229	JPH3	brown	0.92123
gene17255	SPG7	brown	0.99181
gene17281	MCC	brown	0.91403
gene17307	THEMIS2	turquoise	0.95573
gene17310	LOC106046582	turquoise	0.94303
gene17323	LOC106046592	green	0.96693
gene17347	PMFBP1	turquoise	0.9075
gene17352	ZNF821	turquoise	0.91482
gene17369	LOC106046649	turquoise	0.97902
gene17371	MTURN	blue	0.91615
gene17381	ASTE1	turquoise	0.97665
gene17395	SMARCA5	turquoise	0.92473
gene17411	CLGN	turquoise	0.93508
gene17449	NPTX1	green	0.94794
gene17451	RNF213	green	0.95454
gene17452	SLC26A11	green	0.92254
gene17455	CCDC40	yellow	0.94437
gene17457	CBX4	turquoise	0.91601
gene17466	USP36	yellow	0.95808
gene17471	SOCS3	yellow	0.95588
gene17473	TK1	turquoise	0.91862
gene17476	LOC106046794	green	0.9386
gene17506	LOC106046813	turquoise	0.93381
gene1751	TBC1D30	turquoise	0.93441
gene17512	CDC25A	turquoise	0.90526
gene17529	NBEAL2	turquoise	0.97109
gene17574	KIF5C	turquoise	0.9077
gene17580	NMI	green	0.90725
gene17612	ARHGAP27	turquoise	0.94943
gene17622	FMNL1	turquoise	0.97343
gene17626	PLCD3	blue	0.91237
gene17628	LOC106046933	turquoise	0.94389
gene17655	NEMF	brown	0.95026
gene17686	TRAF3	turquoise	0.91436
gene17689	RCOR1	turquoise	0.93661
gene17711	IFITM5	yellow	0.92542
gene17713	B4GALNT4	green	0.93235
gene17714	PKP3	green	0.97036
gene1772	SLC16A7	brown	0.95059
gene17723	LOC106047082	yellow	0.91971
gene17731	DNAJC17	brown	0.92574
gene17741	LOC106047072	blue	0.92206
gene17779	ZNF750	green	0.90396
gene17780	FN3K	brown	0.97695
gene17804	TPX2	turquoise	0.91634
gene1781	LRIG3	brown	0.91638
gene17814	LOC106047154	green	0.92516
gene17815	PLAGL2	turquoise	0.91292
gene17850	MMP9	yellow	0.94354
gene17852	NCOA5	turquoise	0.90773
gene17853	CD40	turquoise	0.94187
gene17860	CCNDBP1	turquoise	0.911
gene17866	MYOCD	yellow	0.93104
gene17890	CEP104	blue	0.92982
gene17900	KCNAB2	turquoise	0.96457
gene17904	ICMT	green	0.93298
gene17906	ACOT7	green	0.91311
gene17913	KLHL21	yellow	0.97539
gene1792	SLC38A2	yellow	0.95234
gene17923	TNFRSF9	turquoise	0.97316
gene17925	ERRFI1	yellow	0.99225
gene17932	USP20	blue	0.9463
gene17947	SH3GLB2	brown	0.98078
gene17957	ZER1	brown	0.91851
gene17963	GLE1	turquoise	0.95322
gene17964	ODF2	turquoise	0.9797
gene17978	TOR2A	turquoise	0.94324
gene17993	STK32C	yellow	0.95651
gene18	NPM3	yellow	0.91745
gene1800	ANO6	blue	0.95342
gene18015	LOC106047346	green	0.93497
gene18037	WDR35	blue	0.92783
gene18079	GRAMD2	turquoise	0.91042
gene1808	TWF1	blue	0.96758
gene18090	SNX22	turquoise	0.95361
gene18101	LOC106047427	green	0.98369
gene18102	SEC11A	green	0.92056
gene18107	ALPK3	blue	0.91158
gene18134	LOC106047481	turquoise	0.91616
gene1814	PRICKLE1	brown	0.90545
gene18166	ZNF185	green	0.9487
gene18192	ALKBH8	brown	0.93355
gene18195	SLC35F2	yellow	0.92671
gene182	FBXL15	yellow	0.90598
gene18252	IL1RAP	yellow	0.92268
gene18285	NCAPH	turquoise	0.97379
gene18290	ANTXR1	blue	0.90808
gene18295	ARHGAP25	turquoise	0.96097
gene18296	CDS2	brown	0.95236
gene1830	DNAJB9	yellow	0.90043
gene18300	RASSF2	turquoise	0.95012
gene18302	PROM2	green	0.97708
gene18304	SUCNR1	yellow	0.92495
gene18305	AADAC	brown	0.92704
gene18310	P2RY13	turquoise	0.9367
gene18311	GPR87	green	0.98353
gene18333	CP	blue	0.9135
gene18341	ENDOU	green	0.91551
gene18347	RACGAP1	turquoise	0.90206
gene18354	LIMA1	blue	0.95452
gene18365	ATG101	yellow	0.91389
gene18388	TOX2	turquoise	0.90613
gene18390	CBFA2T2	brown	0.90566
gene18397	MIS18BP1	turquoise	0.92364
gene18403	KLHL28	turquoise	0.94352
gene18427	NUF2	turquoise	0.95332
gene18465	PTPN6	turquoise	0.97553
gene18476	CD4	turquoise	0.96711
gene18477	LAG3	green	0.92294
gene18486	LPAR5	turquoise	0.91407
gene18515	RPS6KA1	turquoise	0.91601
gene18521	ZDHHC18	turquoise	0.93616
gene18522	SFN	green	0.97617
gene18524	GPATCH3	yellow	0.95093
gene18527	KDF1	green	0.9312
gene18528	FAM46B	green	0.91739
gene1853	SIPA1L2	brown	0.92773
gene1854	MAP10	brown	0.96905
gene18541	LOC106047894	turquoise	0.90907
gene18546	LOC106047901	green	0.9052
gene18548	LOC106047899	turquoise	0.97012
gene18550	ELL	yellow	0.97316
gene18552	TMEM59L	blue	0.90974
gene18555	COMP	blue	0.95191
gene1856	NTPCR	brown	0.965
gene18569	MEF2BNB	turquoise	0.93966
gene18579	CILP2	blue	0.90671
gene18591	LOC106047977	green	0.9407
gene18593	LOC106047978	green	0.95442
gene18594	LOC106048010	green	0.92027
gene18595	LOC106048012	green	0.91138
gene18599	LOC106048011	green	0.95416
gene18600	LOC106047979	green	0.96172
gene18619	LOC106047988	green	0.96897
gene18620	LOC106048003	yellow	0.90016
gene18651	RAB30	brown	0.91793
gene18661	FZD4	brown	0.94378
gene18687	RIMKLB	blue	0.93227
gene18714	LOC106048101	brown	0.95658
gene18727	DAPP1	turquoise	0.96679
gene18740	FOXM1	turquoise	0.949
gene18748	LOC106048163	turquoise	0.92613
gene18766	CDS1	green	0.98315
gene18779	BNC2	blue	0.96277
gene18786	HMHA1	turquoise	0.95337
gene18789	SBNO2	yellow	0.97075
gene1881	ERO1B	turquoise	0.9137
gene18813	GADD45B	yellow	0.96681
gene18816	LOC106048210	turquoise	0.92371
gene1883	EDARADD	turquoise	0.98427
gene18834	LOC106048250	yellow	0.91492
gene18839	NUP160	turquoise	0.93099
gene18876	CD5	turquoise	0.9488
gene18953	LOC106048382	turquoise	0.9246
gene18968	ZAP70	turquoise	0.97802
gene18970	MYO1F	turquoise	0.99014
gene18971	ZNF414	brown	0.93268
gene190	LOC106029878	green	0.90064
gene19016	ETV7	green	0.98397
gene19020	CDKN1A	yellow	0.91237
gene19021	RAB44	turquoise	0.97586
gene19023	PI16	blue	0.93969
gene19055	SOCS7	turquoise	0.90528
gene19078	LOC106048496	green	0.96919
gene19082	TRIM46	green	0.90621
gene19111	DNAJB5	yellow	0.90901
gene19114	ART5	turquoise	0.94927
gene19120	STIM1	turquoise	0.90039
gene19150	TTK	turquoise	0.92221
gene19151	ELOVL4	green	0.94318
gene19161	IL11RA	blue	0.92471
gene19162	LOC106048595	turquoise	0.90927
gene19163	LOC106048600	turquoise	0.93164
gene19177	KIF17	green	0.93691
gene19180	EIF4G3	yellow	0.9682
gene192	PIK3AP1	turquoise	0.949
gene1920	SDCCAG8	blue	0.93878
gene19203	RCCD1	yellow	0.92743
gene19208	SEMA4B	yellow	0.95376
gene19210	ZNF710	turquoise	0.97593
gene19217	RASGRF1	turquoise	0.92355
gene1922	ZBTB18	turquoise	0.95343
gene19220	WDR76	turquoise	0.94268
gene19234	LOC106048691	green	0.92456
gene19235	LOC106048694	green	0.9094
gene19242	LOC106048696	green	0.96319
gene19256	AQP5	green	0.97029
gene19259	LOC106048707	turquoise	0.91952
gene19260	GALNT6	turquoise	0.91023
gene19262	BIN2	turquoise	0.93787
gene19267	CSRNP2	yellow	0.93609
gene19270	LOC106048724	turquoise	0.92568
gene19271	LOC106048725	turquoise	0.95527
gene19286	EZH2	turquoise	0.93007
gene19291	FAM83H	green	0.9764
gene19297	LOC106048737	green	0.92202
gene19315	TRAIP	turquoise	0.90705
gene19317	MST1R	yellow	0.94825
gene19333	LOC106048786	brown	0.90358
gene19334	DUSP3	brown	0.91193
gene19358	URB2	turquoise	0.91086
gene19359	TAF5L	turquoise	0.92256
gene19367	LOC106048825	green	0.93137
gene19371	MELK	turquoise	0.92834
gene19394	LRRC4	turquoise	0.93997
gene19401	LOC106048865	turquoise	0.90225
gene19418	HOXC13	green	0.98454
gene19433	LOC106048913	turquoise	0.93582
gene19453	GCK	yellow	0.98223
gene19459	IRF5	turquoise	0.96379
gene19462	AHCYL2	yellow	0.93079
gene19468	TMEM40	yellow	0.93102
gene19474	CHDH	blue	0.96212
gene19480	METAP1	turquoise	0.97682
gene19498	LOC106048962	turquoise	0.90885
gene19507	LOC106048978	green	0.9661
gene19516	LOC106048981	turquoise	0.95438
gene19571	GATSL3	brown	0.91299
gene19572	LIF	yellow	0.91386
gene19595	LHFP	blue	0.90526
gene19617	POLRMT	turquoise	0.91509
gene19619	CDC34	turquoise	0.91282
gene19621	MADCAM1	turquoise	0.944
gene19625	MIER2	turquoise	0.97452
gene19634	LOC106049115	green	0.97804
gene19635	S100A16	green	0.97051
gene19639	LOC106049125	green	0.92648
gene19640	LOC106049127	green	0.92389
gene19671	WNT4	green	0.92042
gene19681	SPAG5	turquoise	0.90969
gene1970	NANP	green	0.93125
gene19702	CENPP	green	0.93713
gene19706	ECM2	blue	0.92162
gene19708	LOC106049185	turquoise	0.92356
gene19721	LOC106049230	turquoise	0.9233
gene19723	LOC106049228	turquoise	0.91674
gene19724	VANGL2	green	0.92691
gene1973	RMDN2	brown	0.90024
gene19736	LOC106049223	green	0.91685
gene19763	GINS2	turquoise	0.95174
gene19767	IRF8	turquoise	0.93641
gene19817	ABHD12B	brown	0.91522
gene19828	LOC106049323	turquoise	0.95353
gene1990	TJAP1	turquoise	0.92596
gene19904	ABCC5	turquoise	0.95014
gene19926	FAM222B	turquoise	0.95008
gene19933	LOC106049423	green	0.95607
gene19934	LOC106049424	green	0.95748
gene19935	LOC106049425	green	0.98564
gene19937	LOC106049426	turquoise	0.94545
gene19948	RASAL3	turquoise	0.93354
gene19950	LOC106049439	turquoise	0.93291
gene19959	LOC106049445	turquoise	0.93175
gene1996	POLH	turquoise	0.91507
gene19988	GMIP	turquoise	0.98056
gene19992	LOC106049484	turquoise	0.90716
gene20	KCNIP2	blue	0.94934
gene20002	TNIP3	turquoise	0.90435
gene20024	LOC106049525	green	0.96413
gene20029	PTK2B	turquoise	0.98785
gene20033	FAAH2	green	0.91924
gene20037	CCNB3	turquoise	0.93244
gene20058	S1PR4	turquoise	0.93869
gene20066	LOC106049570	green	0.95901
gene20074	CCR7	turquoise	0.9268
gene20078	TOP2A	turquoise	0.91175
gene20079	GJD3	brown	0.91713
gene20085	SENP1	turquoise	0.93271
gene20087	ARHGAP9	turquoise	0.96976
gene2015	AARS2	turquoise	0.9859
gene20184	GSDMA	blue	0.93249
gene20221	LOC106049725	turquoise	0.92528
gene20242	LOC106049758	yellow	0.91485
gene20243	LOC106049751	yellow	0.94226
gene20254	LOC106049750	blue	0.91002
gene20272	TP53BP1	turquoise	0.91032
gene20275	LOC106049783	yellow	0.99339
gene20296	CDC42EP2	yellow	0.92353
gene2031	KCNK5	yellow	0.95774
gene2032	KCNK17	turquoise	0.95547
gene20321	TUFT1	green	0.9171
gene20335	LOC106049856	green	0.95428
gene20353	LOC106049866	blue	0.98209
gene2036	MOCS1	brown	0.90199
gene20369	INCENP	turquoise	0.90265
gene20407	LOC106049920	turquoise	0.9133
gene20438	VCPKMT	turquoise	0.94933
gene20451	RHOD	yellow	0.93888
gene20455	LOC106029317	yellow	0.9113
gene20457	LOC106029319	yellow	0.95505
gene20461	ADRBK1	turquoise	0.96408
gene20481	LOC106029344	turquoise	0.91787
gene20518	LOC106029373	green	0.93683
gene2053	FOSL2	yellow	0.9717
gene20575	SUPT5H	yellow	0.97991
gene20587	GDF15	yellow	0.91672
gene20599	LOC106029457	yellow	0.93346
gene20618	CENPL	turquoise	0.91692
gene20630	LOC106029492	turquoise	0.91375
gene20638	LOC106029497	turquoise	0.93541
gene20642	TAP2	green	0.96472
gene20693	LOC106029557	blue	0.91682
gene20694	LOC106029558	blue	0.90108
gene20713	LOC106029579	turquoise	0.92608
gene20737	LOC106029605	green	0.95176
gene20740	CLCF1	yellow	0.94195
gene20751	LOC106029620	turquoise	0.96507
gene2076	SRBD1	blue	0.92122
gene20798	LOC106029668	yellow	0.93637
gene20819	LOC106029690	turquoise	0.91539
gene20848	LOC106029722	yellow	0.90501
gene2096	EAF2	turquoise	0.97133
gene212	ADAM8	yellow	0.90703
gene214	ZNF511	brown	0.96261
gene2144	LOC106029819	yellow	0.90371
gene2145	STK11IP	yellow	0.92856
gene2146	SLC4A3	yellow	0.97973
gene2160	IFIH1	green	0.90934
gene2185	STK39	turquoise	0.90938
gene2216	METTL8	brown	0.96949
gene2220	SLC25A12	blue	0.94574
gene2232	CDCA7	turquoise	0.91043
gene226	PAPSS2	yellow	0.9402
gene2270	LOC106030024	blue	0.91315
gene2313	CD28	turquoise	0.95038
gene2314	CTLA4	turquoise	0.96851
gene2315	LOC106030066	turquoise	0.95691
gene2317	PARD3B	blue	0.96203
gene2357	FZD7	blue	0.95463
gene2370	ITGB2	turquoise	0.92539
gene2415	GPNMB	green	0.92544
gene2428	DFNA5	brown	0.91685
gene2442	SNX10	turquoise	0.96332
gene2475	ANKRD28	yellow	0.94725
gene2480	DPH3	green	0.90959
gene2496	SGOL1	turquoise	0.92933
gene25	PPRC1	yellow	0.93116
gene2505	LOC106030278	blue	0.91666
gene2519	RARB	blue	0.98067
gene2585	MYO6	blue	0.91946
gene2598	KCNQ5	turquoise	0.96168
gene2646	BMP5	blue	0.988
gene2647	HMGCLL1	blue	0.97622
gene2657	LRRC1	green	0.94859
gene2689	KBTBD11	blue	0.90935
gene2699	SH3YL1	green	0.93701
gene2719	TP53INP1	brown	0.90088
gene2720	CCNE2	turquoise	0.93917
gene2726	ESRP1	green	0.97097
gene2730	FSBP	brown	0.91945
gene2739	RBM12B	turquoise	0.95586
gene2741	FAM92A1	blue	0.92552
gene2750	OTUD6B	turquoise	0.9332
gene2754	NECAB1	blue	0.98213
gene2761	OSGIN2	turquoise	0.909
gene2765	RIPK2	yellow	0.90334
gene2776	RMDN1	brown	0.9338
gene2809	LOC106030570	blue	0.9316
gene2826	ZFHX4	blue	0.92658
gene2836	LY96	turquoise	0.9483
gene286	CDH23	turquoise	0.90011
gene2882	MYBL1	turquoise	0.90245
gene2925	ITGB1BP1	turquoise	0.93289
gene2944	ATP6V1C2	turquoise	0.90778
gene2955	TRIB2	yellow	0.94943
gene2959	FAM84A	green	0.97971
gene2975	VSNL1	green	0.98137
gene30	ARHGAP19	turquoise	0.94614
gene3005	TXK	turquoise	0.96922
gene3013	CWH43	green	0.93396
gene3016	SGCB	blue	0.9904
gene3044	PPAT	turquoise	0.91651
gene3089	LMO3	brown	0.91015
gene3094	DERA	blue	0.91078
gene3117	BID	turquoise	0.93062
gene3124	IL17RA	yellow	0.94284
gene313	DNA2	turquoise	0.94303
gene3187	PTN	yellow	0.91992
gene3198	LOC106030999	blue	0.94937
gene3201	DENND2A	blue	0.93623
gene3205	RAB19	yellow	0.93338
gene3209	KDM7A	yellow	0.91507
gene322	DNAJC12	green	0.92323
gene3227	LOC106031049	green	0.98653
gene3228	SPIC	turquoise	0.94699
gene3254	GLTP	green	0.92676
gene3261	MYO1H	brown	0.9188
gene3267	ACACB	brown	0.96185
gene3275	CORO1C	turquoise	0.94041
gene3276	SELPLG	turquoise	0.91884
gene3279	FICD	yellow	0.90642
gene3292	LOC106031104	green	0.93142
gene3295	ALDH2	blue	0.94636
gene3324	BCL7A	turquoise	0.96134
gene3332	RHOF	turquoise	0.904
gene3340	ANAPC5	brown	0.96517
gene3342	LOC106031149	blue	0.91051
gene3345	IFT81	blue	0.94422
gene3348	LOC106031415	yellow	0.94031
gene3356	ABCB9	yellow	0.9193
gene3373	TCTN2	blue	0.91399
gene34	ZDHHC16	turquoise	0.92127
gene3401	FZD10	green	0.91892
gene3414	ULK1	yellow	0.94093
gene342	RTKN2	turquoise	0.99568
gene343	ARID5B	yellow	0.94314
gene3431	LOC106031230	blue	0.9228
gene3455	CDC45	turquoise	0.93513
gene349	CDK1	turquoise	0.90375
gene3514	MED15	turquoise	0.9082
gene353	CCDC6	blue	0.90891
gene3533	ANHX	turquoise	0.96118
gene3538	PISD	yellow	0.91178
gene354	SLC16A9	brown	0.92907
gene3544	PIK3IP1	brown	0.92905
gene3574	CIT	turquoise	0.94718
gene3578	HSPB8	yellow	0.92795
gene3660	MRPS10	turquoise	0.95869
gene3669	TRAF5	turquoise	0.95725
gene3673	NEK2	turquoise	0.92929
gene3677	INTS7	turquoise	0.92691
gene3717	LYPLAL1	brown	0.96432
gene3749	LIN9	turquoise	0.93846
gene3754	ADCK3	brown	0.92156
gene3758	LOC106031598	yellow	0.91022
gene3764	LCLAT1	blue	0.90631
gene377	BMPR1A	blue	0.95838
gene3782	GALNT16	blue	0.90927
gene3789	ZFP36L1	yellow	0.9137
gene3796	TMEM229B	turquoise	0.96591
gene3802	LOC106031772	green	0.92172
gene3829	ARHGAP11A	turquoise	0.96898
gene385	GPRIN2	turquoise	0.92967
gene3858	G2E3	turquoise	0.97978
gene3875	NPAS3	blue	0.93453
gene3886	LOC106031755	green	0.92218
gene3889	IRF7	green	0.96282
gene3891	PIDD1	turquoise	0.91989
gene3899	TSPAN4	blue	0.9397
gene3921	GPR18	turquoise	0.90012
gene3953	LOC106031833	yellow	0.97603
gene3954	LOC106031832	yellow	0.95314
gene3958	TRIM8	yellow	0.95319
gene3968	TAF5	turquoise	0.95352
gene3981	COL17A1	green	0.97334
gene4021	ADRA2A	yellow	0.92791
gene4029	ACSL5	turquoise	0.91729
gene4032	TCF7L2	blue	0.957
gene4052	ATRNL1	blue	0.9125
gene4085	LRRC34	turquoise	0.93574
gene410	LOC106032461	turquoise	0.92234
gene4102	PLD1	yellow	0.92336
gene4110	ECT2	turquoise	0.92486
gene4152	LAMP3	turquoise	0.956
gene4154	B3GNT5	turquoise	0.90428
gene4181	CARD11	turquoise	0.91376
gene42	CRTAC1	green	0.93788
gene423	TMEM254	green	0.95104
gene4253	SLC5A10	turquoise	0.94291
gene4254	FAM83G	green	0.91319
gene4266	LMF1	blue	0.97543
gene4269	LOC106032129	turquoise	0.92708
gene4280	FAHD1	brown	0.91714
gene4315	EDNRA	brown	0.94881
gene4317	PRMT9	turquoise	0.93817
gene4319	NR3C2	blue	0.93253
gene4341	FHDC1	green	0.97135
gene4343	TRIM2	blue	0.96721
gene4491	HINT3	brown	0.91679
gene4502	LOC106032484	brown	0.90275
gene4508	LAMA2	blue	0.92124
gene4545	MYB	turquoise	0.90256
gene4552	MTFR2	turquoise	0.9561
gene4555	MAP7	green	0.93047
gene4566	LOC106032402	green	0.95524
gene4572	NHSL1	blue	0.93396
gene4576	ABRACL	turquoise	0.92767
gene4580	CITED2	brown	0.95029
gene4609	REV3L	yellow	0.91319
gene462	AP3M1	turquoise	0.93017
gene4637	FOXO3	yellow	0.91117
gene4642	OSTM1	turquoise	0.96541
gene4645	SOBP	blue	0.94122
gene4649	QRSL1	turquoise	0.94077
gene4651	AIM1	green	0.96473
gene4693	EGR1	yellow	0.9086
gene4700	CDC23	turquoise	0.9671
gene4710	SH3RF2	green	0.98702
gene4772	TCF7	turquoise	0.90938
gene4787	PITX1	green	0.93162
gene4795	LOC106032655	green	0.94091
gene4820	CLK4	turquoise	0.91815
gene4828	CNOT6	turquoise	0.97224
gene4829	LOC106032902	blue	0.90294
gene4853	ARSI	blue	0.92883
gene4861	DCTN4	blue	0.91266
gene4867	CCDC69	turquoise	0.96737
gene4903	LOC106032855	turquoise	0.9027
gene4907	CYFIP2	turquoise	0.90987
gene4909	NIPAL4	green	0.98253
gene4910	ADAM19	yellow	0.91187
gene4919	EBF1	blue	0.92707
gene4932	THOC3	turquoise	0.91931
gene4939	RNF44	turquoise	0.92047
gene4941	ROR1	blue	0.94758
gene4956	NFIA	blue	0.95177
gene4965	JUN	yellow	0.94327
gene497	CD8A	turquoise	0.92072
gene4973	PRKAA2	brown	0.95603
gene5042	BEND5	brown	0.91568
gene5049	TRABD2B	blue	0.93508
gene5054	STIL	turquoise	0.94181
gene5059	LOC106032947	blue	0.98054
gene5084	IPP	turquoise	0.9163
gene5098	ZSWIM5	yellow	0.95315
gene5106	PLK3	yellow	0.96593
gene5109	KIF2C	turquoise	0.91171
gene5116	DMAP1	turquoise	0.91194
gene5119	WDR59	turquoise	0.91036
gene5120	FA2H	green	0.94823
gene513	SPON2	blue	0.94476
gene5134	CMTR2	green	0.9027
gene5161	LOC106033135	turquoise	0.95071
gene5173	E2F4	turquoise	0.97695
gene5176	PSKH1	turquoise	0.95346
gene5179	CENPT	turquoise	0.97985
gene5181	RANBP10	yellow	0.91305
gene5198	GFOD2	turquoise	0.94675
gene5247	KCTD15	blue	0.90511
gene525	SLBP	turquoise	0.90019
gene5295	WWOX	blue	0.98946
gene530	FGFR3	brown	0.91278
gene5305	CENPN	turquoise	0.94469
gene5329	LOC106033340	blue	0.94717
gene5334	NUBP2	turquoise	0.93917
gene5346	LOC106033391	turquoise	0.95321
gene5347	45547	turquoise	0.97631
gene5356	NLRC3	turquoise	0.92379
gene5370	CDIP1	brown	0.91264
gene5420	MPV17L	turquoise	0.9059
gene5460	LOC106033473	brown	0.94415
gene5464	DCUN1D3	yellow	0.91266
gene548	TNIP2	yellow	0.95794
gene5481	CDR2	yellow	0.9075
gene5491	CYTH3	blue	0.92099
gene5505	BAIAP2L1	brown	0.96588
gene5508	NPTX2	brown	0.96322
gene5520	PRKAR1B	brown	0.92057
gene5521	DNAAF5	turquoise	0.91565
gene5524	ADAP1	turquoise	0.96315
gene5530	GPER1	turquoise	0.9369
gene5558	LOC106033637	green	0.93836
gene556	GRK4	turquoise	0.96985
gene557	LOC106034660	turquoise	0.99052
gene5579	SEMA6D	brown	0.97605
gene5593	LOC106033657	blue	0.91473
gene5597	MAPK6	yellow	0.96571
gene5616	RAB27A	turquoise	0.9383
gene5639	AQP9	brown	0.9221
gene5643	ADAM10	turquoise	0.90669
gene5647	CCNB2	turquoise	0.94934
gene5673	OTUD7A	turquoise	0.91743
gene5700	TLN2	blue	0.96845
gene5706	LOC106033758	turquoise	0.91302
gene5740	LPXN	turquoise	0.92593
gene576	ACOX3	brown	0.90917
gene5814	PRRG4	green	0.92411
gene5831	LOC106033848	brown	0.92937
gene5867	PTPRF	green	0.9481
gene5871	ELOVL1	yellow	0.93776
gene5872	CDC20	turquoise	0.90519
gene5880	PIF1	turquoise	0.91591
gene5925	RPF1	turquoise	0.92891
gene5927	SPATA1	blue	0.93485
gene5934	MCOLN2	turquoise	0.92209
gene5948	LOC106034001	green	0.99505
gene5965	LRRC8D	yellow	0.95777
gene6002	PDGFD	blue	0.92342
gene601	EVC2	brown	0.97754
gene6029	CCDC82	brown	0.90877
gene6031	MAML2	blue	0.94408
gene6037	ENDOD1	yellow	0.95444
gene6043	ANKRD49	turquoise	0.91761
gene6054	LOC106034174	yellow	0.90297
gene6070	LOC106034162	brown	0.91773
gene6080	TMEM135	brown	0.91305
gene6097	ZC3H12D	yellow	0.92872
gene6107	LOC106034274	green	0.96119
gene6118	CCDC170	blue	0.96761
gene6125	FBXO5	turquoise	0.9707
gene6166	LOC106034313	blue	0.90566
gene6185	MZB1	turquoise	0.91001
gene62	LOC106037870	brown	0.93952
gene6216	DOCK2	turquoise	0.93496
gene6237	HMMR	turquoise	0.93791
gene6254	LOC106034391	turquoise	0.95196
gene6255	PTTG1	turquoise	0.93008
gene6262	LOC106034367	turquoise	0.95412
gene6272	SLC26A2	green	0.90791
gene6275	ARHGEF37	green	0.90669
gene6293	LOC106034579	blue	0.91949
gene6301	USP40	turquoise	0.97875
gene6309	SH3BP4	blue	0.90238
gene6322	IQCA1	blue	0.95448
gene6349	ABCA12	green	0.95533
gene6432	SSTR2	brown	0.93282
gene645	FGFBP1	green	0.95044
gene6451	ARSG	blue	0.92266
gene6473	LOC106034797	brown	0.9149
gene6475	PITPNC1	turquoise	0.91908
gene6479	KPNA2	turquoise	0.95285
gene6487	TEX2	blue	0.92266
gene6495	RNF135	green	0.90394
gene6498	CRLF3	turquoise	0.90927
gene6499	SUZ12	turquoise	0.94437
gene65	KNDC1	brown	0.9381
gene6506	RAB11FIP4	yellow	0.96209
gene6519	HLF	blue	0.97207
gene6522	STXBP4	blue	0.94275
gene6553	CHAD	blue	0.91472
gene6559	LOC106034831	turquoise	0.90174
gene6563	NAT9	brown	0.92882
gene658	NCAPG	turquoise	0.94663
gene6590	NUP85	turquoise	0.9136
gene6611	UNK	brown	0.90599
gene6621	EVPL	green	0.98289
gene6630	UBE2O	turquoise	0.90872
gene6641	METTL23	yellow	0.94464
gene6659	TFAP2A	green	0.96125
gene6673	DSP	green	0.97443
gene6683	F13A1	blue	0.95142
gene6692	CDYL	blue	0.9453
gene6723	NDC80	turquoise	0.90046
gene6724	SMCHD1	turquoise	0.92177
gene6749	PTPRM	blue	0.92912
gene6753	MTCL1	yellow	0.96646
gene6777	SLMO1	yellow	0.97201
gene6787	CEP192	yellow	0.9281
gene6808	LOC106035094	blue	0.9772
gene6809	THSD1	blue	0.96136
gene6811	CKAP2	turquoise	0.91795
gene6847	RCBTB2	brown	0.91059
gene685	CCDC149	blue	0.94052
gene6855	HTR2A	yellow	0.95336
gene691	SEPSECS	brown	0.91589
gene692	PI4K2B	turquoise	0.90935
gene6929	POMK	brown	0.90466
gene6943	MICU3	blue	0.92552
gene6952	LOC106035236	blue	0.97474
gene6969	LOC106035235	blue	0.92404
gene6979	SNX25	turquoise	0.90347
gene6986	CENPU	turquoise	0.93582
gene6988	CASP3	turquoise	0.94809
gene7034	LAPTM4B	green	0.93058
gene7036	MATN2	blue	0.91327
gene7048	OSR2	blue	0.93299
gene712	SLC25A29	yellow	0.91327
gene715	EVL	turquoise	0.9443
gene7167	PM20D2	brown	0.97738
gene7177	BACH2	yellow	0.90269
gene7257	LOC106035461	green	0.95409
gene7274	PPP4R2	turquoise	0.90954
gene7285	CHL1	green	0.9663
gene7299	ARMC10	brown	0.93934
gene7300	FBXL13	blue	0.92307
gene7312	MAGI2	blue	0.9101
gene7363	LOC106035653	blue	0.92941
gene7378	IL31RA	yellow	0.93524
gene7400	ZSWIM6	yellow	0.96198
gene7403	KIF2A	turquoise	0.9616
gene7410	HTR1A	yellow	0.95217
gene7411	RNF180	brown	0.9626
gene7440	MITD1	green	0.93833
gene7447	UNC50	turquoise	0.94361
gene7475	LOC106035673	green	0.98686
gene7487	LOC106035752	turquoise	0.9106
gene7491	P2RY8	turquoise	0.93255
gene7500	XG	green	0.9575
gene7510	PRKX	turquoise	0.90566
gene7515	NUP37	brown	0.91613
gene7519	IGF1	blue	0.94312
gene7565	PWP1	yellow	0.91646
gene7598	NCF4	turquoise	0.94787
gene76	BLNK	turquoise	0.98046
gene7603	MPST	brown	0.94722
gene7610	RAC2	turquoise	0.97146
gene7614	MFNG	turquoise	0.97152
gene7619	SH3BP1	turquoise	0.96153
gene7645	DDX17	turquoise	0.9392
gene765	DDX24	yellow	0.91563
gene7657	SYNGR1	blue	0.94598
gene7658	TAB1	turquoise	0.96173
gene7675	SLC25A17	green	0.91509
gene7677	XPNPEP3	brown	0.9167
gene7689	ANKS6	blue	0.97656
gene7697	SLC39A6	turquoise	0.97953
gene7705	AHRR	green	0.91332
gene7713	NR4A3	yellow	0.97123
gene7723	SCGN	green	0.98692
gene7726	FAM65B	turquoise	0.95928
gene7746	ZADH2	turquoise	0.90113
gene7777	LOC106036118	yellow	0.92902
gene7782	PWP2	yellow	0.95076
gene7808	SLC37A1	turquoise	0.96736
gene7810	UBASH3A	turquoise	0.93044
gene7822	RIPK4	green	0.98604
gene7825	LOC106036132	green	0.92807
gene7841	ETS2	yellow	0.96814
gene7855	HLCS	brown	0.90242
gene7956	SCG2	yellow	0.96578
gene7964	SGPP2	green	0.97939
gene8005	TTC33	turquoise	0.95554
gene8011	FYB	turquoise	0.95894
gene8018	NUP155	turquoise	0.94007
gene8025	LOC106036387	turquoise	0.94401
gene8041	SLC45A2	turquoise	0.94516
gene8061	CA9	green	0.9456
gene8066	LOC106036393	yellow	0.94863
gene8089	TICRR	turquoise	0.96056
gene8093	FANCI	turquoise	0.90315
gene8096	MFGE8	blue	0.94903
gene812	TDP1	turquoise	0.91818
gene8132	MCTP2	yellow	0.95794
gene8148	ARRDC4	turquoise	0.92186
gene8159	LOC106036472	green	0.97197
gene8160	CERS3	green	0.95852
gene8205	IKZF1	turquoise	0.96862
gene8232	LOC106036526	green	0.9293
gene8234	ROPN1L	brown	0.90303
gene828	GPR65	turquoise	0.97637
gene8304	XPO1	turquoise	0.91912
gene8307	AHSA2	turquoise	0.94589
gene8335	TMCC1	brown	0.94539
gene8347	IRAK2	yellow	0.93805
gene8421	LOC106036766	brown	0.90027
gene8424	SLC4A11	turquoise	0.93671
gene8447	IBA57	turquoise	0.92989
gene8478	VILL	blue	0.94592
gene8487	OXSR1	yellow	0.95849
gene8494	CSRNP1	yellow	0.94738
gene8522	LOC106036885	blue	0.92377
gene8529	ATP2B1	turquoise	0.93479
gene8543	EEA1	blue	0.93452
gene8580	APAF1	turquoise	0.93924
gene86	KIF11	turquoise	0.92144
gene863	B4GALT3	turquoise	0.90241
gene8653	SLC25A25	yellow	0.92946
gene8728	GRIN1	green	0.97264
gene8729	LRRC26	green	0.94744
gene8744	TRAF2	turquoise	0.9737
gene8754	FUT7	turquoise	0.95889
gene8770	LOC106037228	turquoise	0.9191
gene8797	SIX4	brown	0.91014
gene8830	ZBTB25	turquoise	0.92964
gene8845	GPR132	turquoise	0.94583
gene8849	AHNAK2	blue	0.94497
gene885	ZBTB20	blue	0.92953
gene8850	PLD4	turquoise	0.94313
gene887	QTRTD1	turquoise	0.91803
gene888	KIAA1407	brown	0.953
gene8900	PSTPIP2	yellow	0.91016
gene8931	SKA1	turquoise	0.93395
gene8934	ME2	turquoise	0.93834
gene8935	ELAC1	turquoise	0.91625
gene8993	LOC106037436	turquoise	0.9617
gene9031	GDPD2	green	0.97055
gene9035	LOC106037398	yellow	0.91992
gene9036	SLC7A3	yellow	0.96374
gene9039	LOC106037440	brown	0.91544
gene9042	IL2RG	turquoise	0.93523
gene9051	ISPD	blue	0.93762
gene9078	GLCCI1	turquoise	0.92646
gene9091	DLX5	green	0.92508
gene9101	LOC106037503	brown	0.96594
gene9162	LOC106037565	green	0.97015
gene9163	LOC106037566	green	0.97341
gene9164	DSG2	green	0.95737
gene9174	ERCC6L	turquoise	0.92165
gene9177	SASH3	turquoise	0.95811
gene9187	ENOX2	turquoise	0.92263
gene9200	45541	turquoise	0.92936
gene9248	LOC106037695	brown	0.9342
gene926	SFT2D2	turquoise	0.92263
gene9275	GABRE	yellow	0.90058
gene929	GPR161	blue	0.92712
gene9293	BTK	turquoise	0.91564
gene9299	CENPI	turquoise	0.92512
gene9302	LOC106037716	turquoise	0.9202
gene9309	MTCP1	blue	0.93852
gene9335	S100G	green	0.92925
gene9337	TXLNG	turquoise	0.91749
gene9357	MAP7D2	green	0.95632
gene9370	MBTPS2	brown	0.90482
gene9377	ACOT9	blue	0.9483
gene9380	LOC106037815	turquoise	0.91448
gene9393	MTFR1L	turquoise	0.94031
gene9399	LOC106037954	brown	0.92615
gene9401	RSRP1	turquoise	0.95407
gene9404	RUNX3	turquoise	0.91261
gene9415	IL22RA1	green	0.97171
gene9419	PNRC2	turquoise	0.91158
gene9422	HMGCL	turquoise	0.90896
gene9430	MFSD2A	yellow	0.94241
gene9433	LOC106037880	turquoise	0.90725
gene9444	RNF19B	yellow	0.92585
gene9455	LOC106037963	turquoise	0.9253
gene9468	LCK	turquoise	0.92745
gene9470	MARCKSL1	turquoise	0.90197
gene9490	LOC106037937	green	0.97527
gene9491	GJB3	green	0.97123
gene9506	CLSPN	turquoise	0.90575
gene9507	LOC106037928	turquoise	0.96398
gene9510	LOC106037932	yellow	0.97371
gene9519	STK40	yellow	0.97587
gene9522	CSF3R	yellow	0.92871
gene9527	ZC3H12A	yellow	0.92985
gene9535	CDCA8	turquoise	0.93232
gene9566	PDE12	yellow	0.91745
gene9619	CENPO	turquoise	0.94103
gene966	NXPE3	turquoise	0.96686
gene9675	MCM3	turquoise	0.91543
gene968	NFKBIZ	yellow	0.95947
gene9706	ENPP4	turquoise	0.94592
gene9713	PLA2G7	turquoise	0.97477
gene9732	LOC106038256	turquoise	0.96281
gene9740	SSPN	blue	0.91775
gene9741	ITPR2	turquoise	0.97458
gene9744	FGFR1OP2	turquoise	0.94255
gene9759	LOC106038249	turquoise	0.90405
gene9787	FAM118A	brown	0.92059
gene9797	LOC106038235	blue	0.91172
gene9799	LOC106038239	blue	0.92195
gene9838	TRAK1	blue	0.90046
gene9845	KIAA1143	blue	0.92495
gene9846	KIF15	turquoise	0.95907
gene9852	CDCP1	green	0.90932
gene9865	FYCO1	blue	0.9597
gene9866	CXCR6	turquoise	0.91287
gene9867	XCR1	turquoise	0.92913
gene9870	LOC106038357	turquoise	0.97448
gene9871	TOPBP1	turquoise	0.96456
gene990	KIAA1524	turquoise	0.93249
gene9911	MCM4	turquoise	0.92419
gene992	LOC106039194	turquoise	0.92798
gene993	LOC106039182	turquoise	0.93935
gene9941	FAM49B	turquoise	0.96734
gene9944	LOC106038467	turquoise	0.91691
gene9948	MYC	yellow	0.97576
gene9954	NSMCE2	yellow	0.92759
gene9972	WDYHV1	turquoise	0.9072
gene9973	ATAD2	brown	0.97893
