# Supplementary material for: Transcriptome Profiling Unveils Key Genes Regulating the Growth and Development of Yangzhou Goose Knob
Source: Int J Mol Sci. 2024 Apr 10;25(8):4166. doi: 10.3390/ijms25084166 (PMC11050116; doi:10.3390/ijms25084166)
Supplement: Supplementary file 1 [file ijms-25-04166-s001.zip › Table S10.xlsx]

## Sheet: Table S12
Table S10 Module component analysis table
gene10970		gene10002	SAMD12	blue	0.92478
gene16609		gene10052	TMEM164	turquoise	0.95782
gene4021		gene10056	ACSL4	yellow	0.98359
gene20461		gene10057	NXT2	turquoise	0.90091
gene13078		gene10067	LOC106038552	turquoise	0.9681
gene14384		gene1007	PHLDB2	blue	0.92382
gene76		gene10076	TENM1	yellow	0.90281
gene2646		gene10078	SH2D1A	turquoise	0.94836
gene4181		gene10080	XIAP	turquoise	0.95289
gene6988		gene10093	LOC106038686	brown	0.92485
gene16645		gene10098	MAD2L1	turquoise	0.95478
gene2720		gene10117	NDST4	turquoise	0.9
gene20074		gene10119	UGT8	yellow	0.97347
gene1063		gene1014	LOC106039358	turquoise	0.9284
gene2313		gene10142	ELOVL6	green	0.93059
gene17853		gene10159	LEF1	turquoise	0.96557
gene1496		gene10168	TMEM209	turquoise	0.94812
gene497		gene1017	BTLA	turquoise	0.91401
gene6553		gene10182	ASB13	turquoise	0.9065
gene13920		gene10183	LOC106038708	green	0.97385
gene20740		gene10212	LOC106038726	yellow	0.92436
gene18555		gene10220	PRKCQ	turquoise	0.90168
gene9522		gene10225	ITIH5	brown	0.93383
gene2314		gene10230	GATA3	turquoise	0.9443
gene12997		gene10243	LOC106038813	blue	0.95227
gene10735		gene10247	BAZ1A	yellow	0.96456
gene9866		gene10250	PPP2R3C	turquoise	0.93009
gene5491		gene10291	AREL1	turquoise	0.95144
gene18727		gene1031	NSUN3	brown	0.91299
gene11576		gene10317	ANGEL1	brown	0.93047
gene1417		gene10348	INSIG1	brown	0.90132
gene12795		gene10366	NCAPG2	turquoise	0.94108
gene10440		gene10394	FGFR2	green	0.90364
gene6216		gene1040	EPHA6	blue	0.92597
gene13852		gene10429	TEX36	blue	0.92267
gene19334		gene1044	MINA	brown	0.96256
gene12131		gene10440	DOCK1	blue	0.90986
gene4315		gene10446	PTPRE	turquoise	0.91346
gene11894		gene10447	MKI67	turquoise	0.91186
gene7841		gene10476	LOC106039065	green	0.93453
gene601		gene10479	LYN	turquoise	0.96095
gene530		gene10493	FAM110B	brown	0.95555
gene4637		gene10505	CHD7	yellow	0.9058
gene9275		gene10548	LOC106039127	turquoise	0.95845
gene10230		gene10563	TMEM156	turquoise	0.96845
gene20587		gene10569	LIAS	brown	0.93443
gene8728		gene10570	UGDH	yellow	0.936
gene556		gene10577	RHOH	turquoise	0.92525
gene6237		gene10593	VPS8	brown	0.94604
gene7410		gene10595	EHHADH	brown	0.95577
gene6855		gene1062	LOC106039877	turquoise	0.92941
gene15729		gene10620	SENP2	turquoise	0.91581
gene7519		gene10624	SLCO2A1	yellow	0.93876
gene11193		gene1063	CD2	turquoise	0.96026
gene19161		gene1064	PTGFRN	blue	0.90986
gene11169		gene10658	45537	turquoise	0.90536
gene12853		gene10674	ARHGEF4	brown	0.96095
gene18252		gene10682	KLHL6	turquoise	0.93585
gene16831		gene10693	LOC106039183	blue	0.91244
gene9415		gene10701	BDH1	turquoise	0.95619
gene14611		gene10723	HRASLS	brown	0.92313
gene9042		gene10735	CXCR4	turquoise	0.90793
gene11669		gene10737	MCM6	turquoise	0.97352
gene14670		gene10747	ACMSD	turquoise	0.94476
gene2370		gene10748	TMEM163	turquoise	0.92877
gene16763		gene10756	SLC35F5	brown	0.94224
gene4965		gene10772	MARCO	turquoise	0.94402
gene4508		gene10780	CEP70	yellow	0.90371
gene13591		gene10782	PARP9	green	0.93488
gene9468		gene10796	WNT10A	green	0.93361
gene19572		gene10810	USP37	turquoise	0.92696
gene20455		gene10813	RNPC3	turquoise	0.90532
gene20630		gene10823	LOC106039415	brown	0.92653
gene2315		gene10839	LOC106039479	green	0.94248
gene3342		gene10846	LOC106039426	brown	0.91909
gene3348		gene10861	SLC44A3	brown	0.94138
gene7487		gene10862	F3	green	0.93273
gene9870		gene10889	GLMN	turquoise	0.92165
gene10183		gene109	HECTD2	yellow	0.93326
gene11513		gene10940	LOC106039544	blue	0.94065
gene12290		gene10945	MAP3K4	turquoise	0.90266
gene12296		gene10970	ADCY7	turquoise	0.94336
gene1164		gene10996	MYLK3	yellow	0.96046
gene12665		gene11000	SHCBP1	turquoise	0.94279
gene12788		gene11034	LOC106039631	yellow	0.9137
gene12814		gene11091	LOC106039689	green	0.94888
gene12856		gene11108	CLMP	blue	0.92717
gene1358		gene11114	LOC106039708	blue	0.96153
gene1362		gene11127	LOC106039711	yellow	0.96629
gene1359		gene11128	TRIM29	green	0.96509
gene14053		gene11130	PVRL1	green	0.94277
gene1361		gene11135	C1QTNF5	blue	0.91811
gene14267		gene11139	PDZD3	turquoise	0.95161
gene15263		gene11164	DIXDC1	brown	0.93819
gene1497		gene11169	IL18	yellow	0.933
gene16487		gene11181	ANKK1	green	0.96329
gene16692		gene11187	MPZL2	green	0.92569
gene16782		gene11193	IL10RA	turquoise	0.92443
gene16946		gene11194	TMPRSS13	green	0.92231
gene16955		gene11232	SLC37A4	turquoise	0.90334
gene17136		gene11235	CCDC84	turquoise	0.9293
gene17323		gene11247	TMEM126A	brown	0.97065
gene158		gene11254	EED	yellow	0.92946
gene18816		gene11315	RNF152	brown	0.94047
gene19162		gene11327	SERPINB5	green	0.96853
gene19163		gene1133	SAMSN1	turquoise	0.90913
gene19934		gene11333	STAT1	green	0.95787
gene19959		gene11335	STAT4	turquoise	0.95887
gene20407		gene11341	TMEFF2	blue	0.92936
gene14052		gene11358	COQ10B	blue	0.90063
gene18486		gene11374	LOC106040021	turquoise	0.90729
gene19394		gene11383	CLK1	turquoise	0.981
gene2836		gene114	KIF20B	turquoise	0.91934
gene10479		gene11404	ATG7	brown	0.92472
gene19621		gene11407	SYN2	blue	0.96321
gene7312		gene11426	IQSEC1	blue	0.92533
gene6031		gene11462	ZBTB17	turquoise	0.90336
gene9309		gene11472	ATP13A2	turquoise	0.94153
gene4545		gene11513	LOC106040243	blue	0.92115
gene9948		gene11525	FHAD1	yellow	0.9003
gene10996		gene11526	TMEM51	green	0.93577
gene12339		gene11539	LOC106040189	green	0.92523
gene16188		gene1157	STK4	turquoise	0.95658
gene15079		gene11570	MASP2	green	0.986
gene12669		gene11576	DDX58	green	0.93876
gene7491		gene11581	TSTD2	turquoise	0.94503
gene16183		gene11625	LOC106040256	yellow	0.96507
gene3891		gene1164	LOC106041081	turquoise	0.94516
gene192		gene11647	HS6ST1	blue	0.92406
gene1356		gene11669	INPP5D	turquoise	0.97657
gene17626		gene1168	PKIG	yellow	0.90269
gene4102		gene11687	TNFRSF19	brown	0.91687
gene10250		gene1169	TTPAL	turquoise	0.92879
gene4973		gene11690	SGCG	blue	0.93111
gene16801		gene11706	SKA3	turquoise	0.94351
gene10220		gene11714	IFT88	blue	0.90692
gene20029		gene11716	LOC106040406	green	0.98478
gene13131		gene11717	LOC106040409	green	0.98205
gene5867		gene11720	PSPC1	turquoise	0.93865
gene6749		gene11727	FDX1	turquoise	0.90611
gene11130		gene11741	LMNB1	turquoise	0.95709
gene19948		gene11749	ZNF462	brown	0.9095
gene19217		gene11756	FSD1L	turquoise	0.96542
gene12556		gene11770	THAP1	turquoise	0.92733
gene18515		gene11773	IDUA	brown	0.90971
gene9404		gene11778	TMEM175	brown	0.95128
gene12205		gene11805	IL17REL	turquoise	0.92107
gene3276		gene11812	PIM3	yellow	0.95868
gene17471		gene11832	ANOS1	brown	0.90678
gene6432		gene1187	EYA2	blue	0.92211
gene11333		gene11894	ETS1	turquoise	0.92725
gene11335		gene11929	NCAPD3	turquoise	0.92035
gene1157		gene11932	ACAD8	turquoise	0.91531
gene16004		gene11943	LOC106040633	turquoise	0.92204
gene5700		gene11951	PPP1R26	turquoise	0.94837
gene15257		gene11955	AGPAT2	green	0.93164
gene11687		gene11966	GPSM1	turquoise	0.93213
gene12056		gene11972	LOC106040742	green	0.928
gene11983		gene11981	PHF19	yellow	0.98802
gene8744		gene11982	LOC106040729	yellow	0.92147
gene17686		gene11983	TRAF1	turquoise	0.92058
gene3669		gene11985	CNTRL	turquoise	0.94148
gene9867		gene11994	MORN5	turquoise	0.90604
gene7500		gene1201	LOC106040595	blue	0.92874
gene10080		gene12027	HSPA5	yellow	0.91621
gene12662		gene12028	GAPVD1	turquoise	0.92371
gene18968		gene12033	MVB12B	turquoise	0.95489
		gene1204	B4GALT5	yellow	0.95357
		gene12041	LOC106040672	turquoise	0.97582
		gene12049	LOC106040763	turquoise	0.92924
		gene12051	HELZ2	green	0.95923
		gene12052	LOC106040764	green	0.94913
		gene12056	TNFRSF6B	yellow	0.96232
		gene12063	UCKL1	turquoise	0.92884
		gene12069	RGS19	turquoise	0.93624
		gene12086	LOC106040774	green	0.99075
		gene1209	SNAI1	yellow	0.91163
		gene12101	OGFR	green	0.94291
		gene12122	TAF4	turquoise	0.98471
		gene12131	EDN3	green	0.93642
		gene12140	TEAD1	blue	0.9007
		gene12142	MICALCL	yellow	0.91797
		gene1215	FAM65C	blue	0.90807
		gene12177	TRIM66	turquoise	0.94052
		gene12184	TUB	brown	0.95714
		gene12185	RIC3	blue	0.93396
		gene12192	PDE3B	turquoise	0.93313
		gene12205	SDC4	yellow	0.95966
		gene12216	NOCT	yellow	0.90498
		gene12254	ARHGAP15	turquoise	0.91949
		gene1226	LOC106041591	yellow	0.91792
		gene12273	VPS37D	turquoise	0.93221
		gene12289	LOC106041087	yellow	0.92451
		gene12290	LOC106041041	yellow	0.94742
		gene12291	LOC106041042	yellow	0.90181
		gene12296	LOC106041043	green	0.95026
		gene123	FAS	turquoise	0.94873
		gene12339	NCF1	turquoise	0.92168
		gene12341	GTF2I	brown	0.95004
		gene12351	RASL11A	turquoise	0.93588
		gene12372	LOC106041153	blue	0.91551
		gene12378	USPL1	turquoise	0.93377
		gene12380	ALOX5AP	yellow	0.90333
		gene12450	BFAR	turquoise	0.90465
		gene12494	BCL2L15	green	0.92675
		gene12495	PTPN22	turquoise	0.96835
		gene12504	PPM1J	turquoise	0.95007
		gene12506	MOV10	green	0.9663
		gene12524	LOC106041346	green	0.97024
		gene12527	IRF6	green	0.93815
		gene12528	LOC106041272	brown	0.90547
		gene12556	RASSF5	turquoise	0.96221
		gene12557	IKBKE	turquoise	0.94072
		gene12560	FAM72A	turquoise	0.90198
		gene12569	PM20D1	brown	0.96935
		gene12590	PPP1R15B	yellow	0.94667
		gene12596	DPH1	yellow	0.94548
		gene12602	WDR81	yellow	0.95844
		gene1261	AURKA	turquoise	0.94994
		gene12619	KCTD7	turquoise	0.91758
		gene1262	CSTF1	turquoise	0.95218
		gene1263	CASS4	yellow	0.90055
		gene12643	RFFL	turquoise	0.94969
		gene12651	RASL10B	brown	0.9381
		gene12662	YWHAG	yellow	0.92124
		gene12665	LOC106041406	yellow	0.93867
		gene12669	ORAI2	turquoise	0.92269
		gene12680	COL26A1	blue	0.91642
		gene12686	RPAIN	green	0.91259
		gene127	ANKRD22	yellow	0.92175
		gene12700	LOC106041486	turquoise	0.90796
		gene12718	SLC6A15	green	0.94611
		gene12749	RGS18	turquoise	0.93776
		gene12760	UAP1	yellow	0.91264
		gene12788	LOC106041570	yellow	0.91864
		gene12792	SUCO	turquoise	0.90567
		gene12795	DNM3	blue	0.95752
		gene12812	METTL18	turquoise	0.90128
		gene12814	LOC106041602	yellow	0.96983
		gene12821	GCC2	brown	0.9039
		gene12849	MFSD9	brown	0.94625
		gene12853	IL18R1	turquoise	0.95283
		gene12856	LOC106041678	green	0.93999
		gene12861	CREG2	brown	0.95637
		gene1292	APCDD1L	blue	0.9064
		gene12929	LOC106041754	turquoise	0.96347
		gene12943	SAP30	green	0.93494
		gene12997	CX3CR1	turquoise	0.90658
		gene13003	UBP1	turquoise	0.94153
		gene13027	HPSE	turquoise	0.93
		gene1304	ZNF831	turquoise	0.91916
		gene13041	LOC106041941	turquoise	0.9031
		gene13046	KLHL8	turquoise	0.9729
		gene13058	PKD2	blue	0.9352
		gene13078	AREG	yellow	0.9637
		gene1308	LOC106042281	blue	0.92513
		gene13085	LOC106041918	yellow	0.92883
		gene13111	PRPF38B	yellow	0.94013
		gene13120	KIF14	turquoise	0.91769
		gene13131	PTPRC	turquoise	0.96053
		gene13143	ASPM	turquoise	0.90602
		gene13146	NAMPT	yellow	0.91813
		gene1315	MAP3K9	turquoise	0.91892
		gene13169	KIF21A	brown	0.95129
		gene13175	GTSE1	turquoise	0.94514
		gene13178	LOC106042035	brown	0.90112
		gene13196	FOXP2	blue	0.93447
		gene13202	TES	yellow	0.94658
		gene13263	NYX	yellow	0.92423
		gene13287	LOC106042158	turquoise	0.94336
		gene13288	LOC106042157	turquoise	0.96899
		gene13310	TOP1MT	turquoise	0.93224
		gene13313	LOC106042183	green	0.95327
		gene1335	LOC106040700	turquoise	0.95362
		gene13395	ANAPC1	turquoise	0.93011
		gene13398	BUB1	turquoise	0.90327
		gene13402	ASB3	turquoise	0.91644
		gene1341	PTGR2	brown	0.9803
		gene13485	CHRDL2	brown	0.9018
		gene13528	ACER3	blue	0.94093
		gene13549	FAT4	blue	0.92927
		gene13559	SPRY1	yellow	0.92221
		gene1356	PLA2G4F	green	0.93007
		gene13561	NUDT6	blue	0.94474
		gene13572	TRPC3	yellow	0.90539
		gene13573	BBS7	blue	0.94578
		gene13574	CCNA2	turquoise	0.94519
		gene1358	LOC106042968	green	0.97181
		gene1359	LOC106042978	green	0.9694
		gene13591	LAMC2	green	0.92532
		gene1361	LOC106043002	green	0.9128
		gene1362	LOC106042972	green	0.96555
		gene13696	CARS	yellow	0.92281
		gene13699	PHLDA2	yellow	0.94511
		gene13710	TSPAN32	yellow	0.90043
		gene1372	MGA	turquoise	0.92546
		gene13726	LOC106042626	turquoise	0.90398
		gene1375	RPAP1	turquoise	0.9049
		gene13750	ARHGAP12	brown	0.90873
		gene13751	ZEB1	blue	0.95183
		gene13772	LOC106042683	turquoise	0.94238
		gene13777	MKX	blue	0.90442
		gene13792	UTP23	green	0.91102
		gene138	ERCC6	turquoise	0.94208
		gene13800	TRPS1	yellow	0.92075
		gene1382	NUSAP1	turquoise	0.9248
		gene13850	SH3PXD2B	blue	0.95284
		gene13852	DUSP1	yellow	0.96017
		gene1386	EXD1	brown	0.91809
		gene13864	MSX2	yellow	0.91313
		gene13873	RGS14	turquoise	0.91268
		gene13875	GRK6	turquoise	0.93448
		gene13882	DUSP7	yellow	0.93282
		gene13896	NEK4	blue	0.90543
		gene13902	SFMBT1	turquoise	0.90757
		gene13910	PRKCD	turquoise	0.91309
		gene13911	LOC106042848	brown	0.96172
		gene13916	LOC106042836	turquoise	0.96636
		gene13918	HEMK1	turquoise	0.96716
		gene13920	CISH	yellow	0.92951
		gene13934	RBM5	turquoise	0.96885
		gene1394	RHOV	green	0.95707
		gene13974	LOC106042900	turquoise	0.95179
		gene13981	STK17A	turquoise	0.91713
		gene13994	LOC106042924	turquoise	0.94068
		gene14021	DOCK8	turquoise	0.96155
		gene14041	LOC106043005	turquoise	0.96465
		gene14042	INPPL1	turquoise	0.95119
		gene14046	KIF4A	turquoise	0.94565
		gene14051	LOC106042984	yellow	0.94161
		gene14052	LPAR4	blue	0.96615
		gene14053	LOC106042993	turquoise	0.90558
		gene14055	GPR174	turquoise	0.94506
		gene14075	LOC106042970	turquoise	0.96281
		gene14080	POF1B	green	0.93022
		gene14139	CBFB	yellow	0.96105
		gene14141	B3GNT9	blue	0.94949
		gene14167	ESRP2	green	0.98153
		gene1417	DGKZ	turquoise	0.98191
		gene14179	LOC106043072	turquoise	0.91338
		gene14180	LOC106043079	green	0.93133
		gene14183	MMP2	blue	0.92678
		gene14185	LOC106043083	blue	0.95146
		gene14201	EPCAM	green	0.9426
		gene14223	LOC106043205	turquoise	0.94011
		gene14255	CPXM1	blue	0.90647
		gene14267	LOC106043193	turquoise	0.98192
		gene14274	DOK1	turquoise	0.98009
		gene14276	NBEA	blue	0.98096
		gene14279	MAB21L1	blue	0.90536
		gene14336	CDHR3	brown	0.90129
		gene14354	ANO10	blue	0.91698
		gene14384	BCL2A1	turquoise	0.98242
		gene1439	SPI1	turquoise	0.93503
		gene14394	MESDC1	yellow	0.9247
		gene14409	LOC106043362	brown	0.90351
		gene14442	RCAN1	yellow	0.92667
		gene14450	SLC5A3	turquoise	0.94276
		gene14477	MIS18A	turquoise	0.94563
		gene145	WDFY4	turquoise	0.95283
		gene14527	PLCG1	turquoise	0.909
		gene14542	SPTSSB	green	0.97639
		gene14551	TRIM59	turquoise	0.90784
		gene14604	PDE4B	yellow	0.90901
		gene14611	IL23R	yellow	0.908
		gene14628	LOC106043611	blue	0.90852
		gene14638	ERICH3	brown	0.92709
		gene14658	UACA	blue	0.96797
		gene14662	KIF23	turquoise	0.9413
		gene1467	ALKBH3	brown	0.90129
		gene14670	ITGA11	blue	0.94767
		gene14690	TIPIN	turquoise	0.967
		gene14695	DENND4A	yellow	0.92581
		gene14740	LOC106043729	turquoise	0.91693
		gene14753	NUDT12	blue	0.90105
		gene14760	SLCO4C1	yellow	0.97041
		gene14766	RGMB	turquoise	0.92124
		gene14772	FAM64A	turquoise	0.90385
		gene14774	KIAA0753	turquoise	0.92597
		gene14784	RAP1GAP2	turquoise	0.91979
		gene14831	PSIP1	turquoise	0.96389
		gene14832	SNAPC3	turquoise	0.91668
		gene14856	IRF4	turquoise	0.94604
		gene14888	CYTIP	turquoise	0.909
		gene14895	NR4A2	yellow	0.92858
		gene14911	CHEK2	turquoise	0.91096
		gene14924	CLN5	brown	0.958
		gene1496	CD44	yellow	0.94077
		gene14962	MOB1B	yellow	0.99187
		gene14963	DCK	turquoise	0.95073
		gene1497	LOC106044451	yellow	0.9651
		gene15033	GCH1	yellow	0.95825
		gene1504	CAT	brown	0.93909
		gene15045	GNPNAT1	yellow	0.92179
		gene15067	FAM78A	turquoise	0.95608
		gene15079	NTNG2	blue	0.91961
		gene15099	MED22	turquoise	0.92994
		gene1511	LOC106044604	brown	0.92077
		gene15149	OSTF1	turquoise	0.92771
		gene15161	PSTPIP1	turquoise	0.95652
		gene15178	PML	green	0.9625
		gene1520	ANO1	yellow	0.94994
		gene15219	BBS4	brown	0.92835
		gene15223	CELF6	green	0.90344
		gene15226	DYNLT1	turquoise	0.92389
		gene15230	TAGAP	turquoise	0.91833
		gene15231	RSPH3	brown	0.91928
		gene15243	ADGRG6	turquoise	0.90648
		gene15257	TNFRSF18	turquoise	0.90822
		gene15258	LOC106044313	turquoise	0.91846
		gene15263	LOC106044308	turquoise	0.9056
		gene15277	H6PD	green	0.90374
		gene15278	SPSB1	yellow	0.91645
		gene15287	NMNAT1	turquoise	0.93245
		gene15290	UBE4B	turquoise	0.93735
		gene15295	PEX14	brown	0.96258
		gene15297	CASZ1	yellow	0.90795
		gene15302	KIAA0895	blue	0.92244
		gene15308	GPR141	turquoise	0.92312
		gene15320	PHACTR1	blue	0.96678
		gene15338	PLAT	brown	0.90246
		gene15363	DDHD2	brown	0.90114
		gene15389	TTI2	turquoise	0.94202
		gene1541	LOC106044856	green	0.95681
		gene15411	ING1	turquoise	0.90539
		gene15435	TMEM2	yellow	0.98068
		gene15451	LOC106044496	brown	0.93619
		gene15475	CPED1	brown	0.90317
		gene15527	FAM120B	brown	0.93314
		gene15550	MXRA8	blue	0.91863
		gene15556	VWA1	yellow	0.91423
		gene15618	APLF	brown	0.90658
		gene15620	PLEK	turquoise	0.90689
		gene15624	WDR92	turquoise	0.96626
		gene15628	ETAA1	brown	0.90285
		gene15635	MEIS1	blue	0.91908
		gene15645	SLC1A4	turquoise	0.9647
		gene1565	LOC106045810	blue	0.94557
		gene1566	LOC106045814	blue	0.97406
		gene15688	MGME1	turquoise	0.92081
		gene15689	OVOL2	green	0.96813
		gene157	ANXA8L1	green	0.95698
		gene15705	LOC106044797	green	0.96389
		gene15729	HTR2B	yellow	0.95573
		gene15751	BCL6	turquoise	0.97368
		gene15756	TP63	green	0.96855
		gene15768	CDH13	blue	0.90174
		gene15781	TLDC1	blue	0.94947
		gene158	LOC106048153	brown	0.92106
		gene1581	LOC106045886	blue	0.93941
		gene1583	LOC106045096	blue	0.92563
		gene15833	ATP8B1	green	0.95728
		gene15837	ZNF532	blue	0.93196
		gene15847	MAST3	yellow	0.96667
		gene15852	LOC106045009	yellow	0.91507
		gene15857	HAUS8	turquoise	0.90715
		gene15871	KLF2	yellow	0.95698
		gene15892	LOC106044971	turquoise	0.9211
		gene15910	PIAS4	turquoise	0.92358
		gene15923	LOC106044958	green	0.94389
		gene15933	CCDC127	blue	0.91402
		gene15956	PLXNB1	green	0.90941
		gene15968	TMEM43	blue	0.91164
		gene15977	SLC41A3	brown	0.97577
		gene16003	DIRAS2	green	0.90382
		gene16004	SYK	turquoise	0.95937
		gene16015	CDC42SE2	turquoise	0.96778
		gene16082	LOC106045189	blue	0.95817
		gene16085	DNAI1	blue	0.95362
		gene16111	RAB11FIP2	blue	0.98679
		gene1614	SERHL2	brown	0.9437
		gene16174	LOC106045305	yellow	0.96842
		gene16176	CREM	yellow	0.94039
		gene16183	PARD3	blue	0.97464
		gene16188	NFKB1	yellow	0.91731
		gene16220	DKK2	turquoise	0.96943
		gene16232	LOC106045365	turquoise	0.93159
		gene16254	RMI1	turquoise	0.90091
		gene16264	FAM83C	green	0.94984
		gene16269	LOC106045430	turquoise	0.96216
		gene16284	LOC106045415	turquoise	0.95424
		gene16286	SAMHD1	green	0.92269
		gene16296	LOC106045440	turquoise	0.91889
		gene16298	EPB41L1	brown	0.92291
		gene16327	PYROXD1	blue	0.93222
		gene16335	NOBOX	yellow	0.91289
		gene16336	CD9	yellow	0.95425
		gene16345	KBTBD2	turquoise	0.95385
		gene16381	DTX1	turquoise	0.92213
		gene16393	AR	blue	0.92577
		gene16397	HEPH	blue	0.92949
		gene16406	LOC106045559	turquoise	0.93569
		gene16411	ZC4H2	brown	0.93438
		gene16426	LOC106045611	turquoise	0.94469
		gene16438	CHGB	yellow	0.91985
		gene16439	TRMT6	turquoise	0.94345
		gene16449	OTX1	green	0.97512
		gene16453	VPS54	turquoise	0.92131
		gene1647	RANGAP1	turquoise	0.94815
		gene16487	LOC106045683	turquoise	0.94761
		gene16499	FZR1	turquoise	0.91234
		gene16506	MBD3	turquoise	0.93597
		gene16512	REXO1	turquoise	0.93565
		gene16515	LOC106045650	green	0.90019
		gene16517	CSNK1G2	turquoise	0.94084
		gene16522	DOT1L	yellow	0.91974
		gene16533	WARS2	brown	0.94543
		gene16534	TBX15	blue	0.94171
		gene16535	SPAG17	blue	0.90549
		gene16539	FAM46C	turquoise	0.92443
		gene16540	DUSP12	turquoise	0.9633
		gene16546	TRIM45	blue	0.9073
		gene16548	CTC1	turquoise	0.97014
		gene16553	GTF2E1	brown	0.90724
		gene16565	SMG8	turquoise	0.96011
		gene16579	GEMIN4	green	0.96049
		gene16602	GSG2	turquoise	0.92948
		gene16608	ZSWIM7	yellow	0.92508
		gene16609	ADORA2B	yellow	0.94212
		gene16645	CCND3	turquoise	0.91634
		gene16654	MDFI	brown	0.96999
		gene16660	DENND2D	turquoise	0.93151
		gene16667	LOC106045877	turquoise	0.9023
		gene16670	PKP1	green	0.96948
		gene16672	LAD1	green	0.96977
		gene16682	IPO9	brown	0.93145
		gene16692	LOC106045913	yellow	0.92138
		gene16708	PECR	brown	0.97798
		gene16709	TMEM169	brown	0.91181
		gene1671	E2F7	turquoise	0.95829
		gene16744	STRADA	turquoise	0.969
		gene16746	LIMD2	turquoise	0.95161
		gene16758	MRC2	blue	0.92181
		gene16763	ITGB3	yellow	0.93275
		gene16782	LOC106045971	turquoise	0.92849
		gene16801	PRKCB	turquoise	0.90811
		gene16810	PLK1	turquoise	0.93542
		gene16813	EARS2	turquoise	0.92974
		gene16828	KDM8	turquoise	0.91008
		gene16829	NSMCE1	yellow	0.97764
		gene16831	IL21R	turquoise	0.91592
		gene1684	CAPS2	blue	0.9167
		gene16847	LOC106046070	green	0.93937
		gene16888	LOC106046187	green	0.92555
		gene16891	CEPT1	turquoise	0.9191
		gene16893	NFYA	turquoise	0.90559
		gene16923	ZNF76	turquoise	0.96298
		gene16925	PPARD	yellow	0.92724
		gene16927	FANCE	turquoise	0.93782
		gene16929	SMPD2	turquoise	0.95434
		gene16940	MAPK13	green	0.93442
		gene16946	LOC106046136	yellow	0.93696
		gene16951	LOC106046139	turquoise	0.91992
		gene16955	LOC106046186	turquoise	0.90014
		gene16969	PHYH	brown	0.92982
		gene16992	CSNK1G3	blue	0.90487
		gene17035	LOC106046248	turquoise	0.90783
		gene17036	MXD1	yellow	0.99058
		gene17051	LOC106046304	brown	0.90154
		gene17056	LOC106046301	turquoise	0.92653
		gene17136	LOC106046390	turquoise	0.91878
		gene17154	EGFR	green	0.97142
		gene17170	F10	yellow	0.92372
		gene17182	TMCO3	blue	0.90854
		gene17183	TFDP1	turquoise	0.95849
		gene17229	JPH3	brown	0.92123
		gene17255	SPG7	brown	0.99181
		gene17281	MCC	brown	0.91403
		gene17307	THEMIS2	turquoise	0.95573
		gene17310	LOC106046582	turquoise	0.94303
		gene17323	LOC106046592	green	0.96693
		gene17347	PMFBP1	turquoise	0.9075
		gene17352	ZNF821	turquoise	0.91482
		gene17369	LOC106046649	turquoise	0.97902
		gene17371	MTURN	blue	0.91615
		gene17381	ASTE1	turquoise	0.97665
		gene17395	SMARCA5	turquoise	0.92473
		gene17411	CLGN	turquoise	0.93508
		gene17449	NPTX1	green	0.94794
		gene17451	RNF213	green	0.95454
		gene17452	SLC26A11	green	0.92254
		gene17455	CCDC40	yellow	0.94437
		gene17457	CBX4	turquoise	0.91601
		gene17466	USP36	yellow	0.95808
		gene17471	SOCS3	yellow	0.95588
		gene17473	TK1	turquoise	0.91862
		gene17476	LOC106046794	green	0.9386
		gene17506	LOC106046813	turquoise	0.93381
		gene1751	TBC1D30	turquoise	0.93441
		gene17512	CDC25A	turquoise	0.90526
		gene17529	NBEAL2	turquoise	0.97109
		gene17574	KIF5C	turquoise	0.9077
		gene17580	NMI	green	0.90725
		gene17612	ARHGAP27	turquoise	0.94943
		gene17622	FMNL1	turquoise	0.97343
		gene17626	PLCD3	blue	0.91237
		gene17628	LOC106046933	turquoise	0.94389
		gene17655	NEMF	brown	0.95026
		gene17686	TRAF3	turquoise	0.91436
		gene17689	RCOR1	turquoise	0.93661
		gene17711	IFITM5	yellow	0.92542
		gene17713	B4GALNT4	green	0.93235
		gene17714	PKP3	green	0.97036
		gene1772	SLC16A7	brown	0.95059
		gene17723	LOC106047082	yellow	0.91971
		gene17731	DNAJC17	brown	0.92574
		gene17741	LOC106047072	blue	0.92206
		gene17779	ZNF750	green	0.90396
		gene17780	FN3K	brown	0.97695
		gene17804	TPX2	turquoise	0.91634
		gene1781	LRIG3	brown	0.91638
		gene17814	LOC106047154	green	0.92516
		gene17815	PLAGL2	turquoise	0.91292
		gene17850	MMP9	yellow	0.94354
		gene17852	NCOA5	turquoise	0.90773
		gene17853	CD40	turquoise	0.94187
		gene17860	CCNDBP1	turquoise	0.911
		gene17866	MYOCD	yellow	0.93104
		gene17890	CEP104	blue	0.92982
		gene17900	KCNAB2	turquoise	0.96457
		gene17904	ICMT	green	0.93298
		gene17906	ACOT7	green	0.91311
		gene17913	KLHL21	yellow	0.97539
		gene1792	SLC38A2	yellow	0.95234
		gene17923	TNFRSF9	turquoise	0.97316
		gene17925	ERRFI1	yellow	0.99225
		gene17932	USP20	blue	0.9463
		gene17947	SH3GLB2	brown	0.98078
		gene17957	ZER1	brown	0.91851
		gene17963	GLE1	turquoise	0.95322
		gene17964	ODF2	turquoise	0.9797
		gene17978	TOR2A	turquoise	0.94324
		gene17993	STK32C	yellow	0.95651
		gene18	NPM3	yellow	0.91745
		gene1800	ANO6	blue	0.95342
		gene18015	LOC106047346	green	0.93497
		gene18037	WDR35	blue	0.92783
		gene18079	GRAMD2	turquoise	0.91042
		gene1808	TWF1	blue	0.96758
		gene18090	SNX22	turquoise	0.95361
		gene18101	LOC106047427	green	0.98369
		gene18102	SEC11A	green	0.92056
		gene18107	ALPK3	blue	0.91158
		gene18134	LOC106047481	turquoise	0.91616
		gene1814	PRICKLE1	brown	0.90545
		gene18166	ZNF185	green	0.9487
		gene18192	ALKBH8	brown	0.93355
		gene18195	SLC35F2	yellow	0.92671
		gene182	FBXL15	yellow	0.90598
		gene18252	IL1RAP	yellow	0.92268
		gene18285	NCAPH	turquoise	0.97379
		gene18290	ANTXR1	blue	0.90808
		gene18295	ARHGAP25	turquoise	0.96097
		gene18296	CDS2	brown	0.95236
		gene1830	DNAJB9	yellow	0.90043
		gene18300	RASSF2	turquoise	0.95012
		gene18302	PROM2	green	0.97708
		gene18304	SUCNR1	yellow	0.92495
		gene18305	AADAC	brown	0.92704
		gene18310	P2RY13	turquoise	0.9367
		gene18311	GPR87	green	0.98353
		gene18333	CP	blue	0.9135
		gene18341	ENDOU	green	0.91551
		gene18347	RACGAP1	turquoise	0.90206
		gene18354	LIMA1	blue	0.95452
		gene18365	ATG101	yellow	0.91389
		gene18388	TOX2	turquoise	0.90613
		gene18390	CBFA2T2	brown	0.90566
		gene18397	MIS18BP1	turquoise	0.92364
		gene18403	KLHL28	turquoise	0.94352
		gene18427	NUF2	turquoise	0.95332
		gene18465	PTPN6	turquoise	0.97553
		gene18476	CD4	turquoise	0.96711
		gene18477	LAG3	green	0.92294
		gene18486	LPAR5	turquoise	0.91407
		gene18515	RPS6KA1	turquoise	0.91601
		gene18521	ZDHHC18	turquoise	0.93616
		gene18522	SFN	green	0.97617
		gene18524	GPATCH3	yellow	0.95093
		gene18527	KDF1	green	0.9312
		gene18528	FAM46B	green	0.91739
		gene1853	SIPA1L2	brown	0.92773
		gene1854	MAP10	brown	0.96905
		gene18541	LOC106047894	turquoise	0.90907
		gene18546	LOC106047901	green	0.9052
		gene18548	LOC106047899	turquoise	0.97012
		gene18550	ELL	yellow	0.97316
		gene18552	TMEM59L	blue	0.90974
		gene18555	COMP	blue	0.95191
		gene1856	NTPCR	brown	0.965
		gene18569	MEF2BNB	turquoise	0.93966
		gene18579	CILP2	blue	0.90671
		gene18591	LOC106047977	green	0.9407
		gene18593	LOC106047978	green	0.95442
		gene18594	LOC106048010	green	0.92027
		gene18595	LOC106048012	green	0.91138
		gene18599	LOC106048011	green	0.95416
		gene18600	LOC106047979	green	0.96172
		gene18619	LOC106047988	green	0.96897
		gene18620	LOC106048003	yellow	0.90016
		gene18651	RAB30	brown	0.91793
		gene18661	FZD4	brown	0.94378
		gene18687	RIMKLB	blue	0.93227
		gene18714	LOC106048101	brown	0.95658
		gene18727	DAPP1	turquoise	0.96679
		gene18740	FOXM1	turquoise	0.949
		gene18748	LOC106048163	turquoise	0.92613
		gene18766	CDS1	green	0.98315
		gene18779	BNC2	blue	0.96277
		gene18786	HMHA1	turquoise	0.95337
		gene18789	SBNO2	yellow	0.97075
		gene1881	ERO1B	turquoise	0.9137
		gene18813	GADD45B	yellow	0.96681
		gene18816	LOC106048210	turquoise	0.92371
		gene1883	EDARADD	turquoise	0.98427
		gene18834	LOC106048250	yellow	0.91492
		gene18839	NUP160	turquoise	0.93099
		gene18876	CD5	turquoise	0.9488
		gene18953	LOC106048382	turquoise	0.9246
		gene18968	ZAP70	turquoise	0.97802
		gene18970	MYO1F	turquoise	0.99014
		gene18971	ZNF414	brown	0.93268
		gene190	LOC106029878	green	0.90064
		gene19016	ETV7	green	0.98397
		gene19020	CDKN1A	yellow	0.91237
		gene19021	RAB44	turquoise	0.97586
		gene19023	PI16	blue	0.93969
		gene19055	SOCS7	turquoise	0.90528
		gene19078	LOC106048496	green	0.96919
		gene19082	TRIM46	green	0.90621
		gene19111	DNAJB5	yellow	0.90901
		gene19114	ART5	turquoise	0.94927
		gene19120	STIM1	turquoise	0.90039
		gene19150	TTK	turquoise	0.92221
		gene19151	ELOVL4	green	0.94318
		gene19161	IL11RA	blue	0.92471
		gene19162	LOC106048595	turquoise	0.90927
		gene19163	LOC106048600	turquoise	0.93164
		gene19177	KIF17	green	0.93691
		gene19180	EIF4G3	yellow	0.9682
		gene192	PIK3AP1	turquoise	0.949
		gene1920	SDCCAG8	blue	0.93878
		gene19203	RCCD1	yellow	0.92743
		gene19208	SEMA4B	yellow	0.95376
		gene19210	ZNF710	turquoise	0.97593
		gene19217	RASGRF1	turquoise	0.92355
		gene1922	ZBTB18	turquoise	0.95343
		gene19220	WDR76	turquoise	0.94268
		gene19234	LOC106048691	green	0.92456
		gene19235	LOC106048694	green	0.9094
		gene19242	LOC106048696	green	0.96319
		gene19256	AQP5	green	0.97029
		gene19259	LOC106048707	turquoise	0.91952
		gene19260	GALNT6	turquoise	0.91023
		gene19262	BIN2	turquoise	0.93787
		gene19267	CSRNP2	yellow	0.93609
		gene19270	LOC106048724	turquoise	0.92568
		gene19271	LOC106048725	turquoise	0.95527
		gene19286	EZH2	turquoise	0.93007
		gene19291	FAM83H	green	0.9764
		gene19297	LOC106048737	green	0.92202
		gene19315	TRAIP	turquoise	0.90705
		gene19317	MST1R	yellow	0.94825
		gene19333	LOC106048786	brown	0.90358
		gene19334	DUSP3	brown	0.91193
		gene19358	URB2	turquoise	0.91086
		gene19359	TAF5L	turquoise	0.92256
		gene19367	LOC106048825	green	0.93137
		gene19371	MELK	turquoise	0.92834
		gene19394	LRRC4	turquoise	0.93997
		gene19401	LOC106048865	turquoise	0.90225
		gene19418	HOXC13	green	0.98454
		gene19433	LOC106048913	turquoise	0.93582
		gene19453	GCK	yellow	0.98223
		gene19459	IRF5	turquoise	0.96379
		gene19462	AHCYL2	yellow	0.93079
		gene19468	TMEM40	yellow	0.93102
		gene19474	CHDH	blue	0.96212
		gene19480	METAP1	turquoise	0.97682
		gene19498	LOC106048962	turquoise	0.90885
		gene19507	LOC106048978	green	0.9661
		gene19516	LOC106048981	turquoise	0.95438
		gene19571	GATSL3	brown	0.91299
		gene19572	LIF	yellow	0.91386
		gene19595	LHFP	blue	0.90526
		gene19617	POLRMT	turquoise	0.91509
		gene19619	CDC34	turquoise	0.91282
		gene19621	MADCAM1	turquoise	0.944
		gene19625	MIER2	turquoise	0.97452
		gene19634	LOC106049115	green	0.97804
		gene19635	S100A16	green	0.97051
		gene19639	LOC106049125	green	0.92648
		gene19640	LOC106049127	green	0.92389
		gene19671	WNT4	green	0.92042
		gene19681	SPAG5	turquoise	0.90969
		gene1970	NANP	green	0.93125
		gene19702	CENPP	green	0.93713
		gene19706	ECM2	blue	0.92162
		gene19708	LOC106049185	turquoise	0.92356
		gene19721	LOC106049230	turquoise	0.9233
		gene19723	LOC106049228	turquoise	0.91674
		gene19724	VANGL2	green	0.92691
		gene1973	RMDN2	brown	0.90024
		gene19736	LOC106049223	green	0.91685
		gene19763	GINS2	turquoise	0.95174
		gene19767	IRF8	turquoise	0.93641
		gene19817	ABHD12B	brown	0.91522
		gene19828	LOC106049323	turquoise	0.95353
		gene1990	TJAP1	turquoise	0.92596
		gene19904	ABCC5	turquoise	0.95014
		gene19926	FAM222B	turquoise	0.95008
		gene19933	LOC106049423	green	0.95607
		gene19934	LOC106049424	green	0.95748
		gene19935	LOC106049425	green	0.98564
		gene19937	LOC106049426	turquoise	0.94545
		gene19948	RASAL3	turquoise	0.93354
		gene19950	LOC106049439	turquoise	0.93291
		gene19959	LOC106049445	turquoise	0.93175
		gene1996	POLH	turquoise	0.91507
		gene19988	GMIP	turquoise	0.98056
		gene19992	LOC106049484	turquoise	0.90716
		gene20	KCNIP2	blue	0.94934
		gene20002	TNIP3	turquoise	0.90435
		gene20024	LOC106049525	green	0.96413
		gene20029	PTK2B	turquoise	0.98785
		gene20033	FAAH2	green	0.91924
		gene20037	CCNB3	turquoise	0.93244
		gene20058	S1PR4	turquoise	0.93869
		gene20066	LOC106049570	green	0.95901
		gene20074	CCR7	turquoise	0.9268
		gene20078	TOP2A	turquoise	0.91175
		gene20079	GJD3	brown	0.91713
		gene20085	SENP1	turquoise	0.93271
		gene20087	ARHGAP9	turquoise	0.96976
		gene2015	AARS2	turquoise	0.9859
		gene20184	GSDMA	blue	0.93249
		gene20221	LOC106049725	turquoise	0.92528
		gene20242	LOC106049758	yellow	0.91485
		gene20243	LOC106049751	yellow	0.94226
		gene20254	LOC106049750	blue	0.91002
		gene20272	TP53BP1	turquoise	0.91032
		gene20275	LOC106049783	yellow	0.99339
		gene20296	CDC42EP2	yellow	0.92353
		gene2031	KCNK5	yellow	0.95774
		gene2032	KCNK17	turquoise	0.95547
		gene20321	TUFT1	green	0.9171
		gene20335	LOC106049856	green	0.95428
		gene20353	LOC106049866	blue	0.98209
		gene2036	MOCS1	brown	0.90199
		gene20369	INCENP	turquoise	0.90265
		gene20407	LOC106049920	turquoise	0.9133
		gene20438	VCPKMT	turquoise	0.94933
		gene20451	RHOD	yellow	0.93888
		gene20455	LOC106029317	yellow	0.9113
		gene20457	LOC106029319	yellow	0.95505
		gene20461	ADRBK1	turquoise	0.96408
		gene20481	LOC106029344	turquoise	0.91787
		gene20518	LOC106029373	green	0.93683
		gene2053	FOSL2	yellow	0.9717
		gene20575	SUPT5H	yellow	0.97991
		gene20587	GDF15	yellow	0.91672
		gene20599	LOC106029457	yellow	0.93346
		gene20618	CENPL	turquoise	0.91692
		gene20630	LOC106029492	turquoise	0.91375
		gene20638	LOC106029497	turquoise	0.93541
		gene20642	TAP2	green	0.96472
		gene20693	LOC106029557	blue	0.91682
		gene20694	LOC106029558	blue	0.90108
		gene20713	LOC106029579	turquoise	0.92608
		gene20737	LOC106029605	green	0.95176
		gene20740	CLCF1	yellow	0.94195
		gene20751	LOC106029620	turquoise	0.96507
		gene2076	SRBD1	blue	0.92122
		gene20798	LOC106029668	yellow	0.93637
		gene20819	LOC106029690	turquoise	0.91539
		gene20848	LOC106029722	yellow	0.90501
		gene2096	EAF2	turquoise	0.97133
		gene212	ADAM8	yellow	0.90703
		gene214	ZNF511	brown	0.96261
		gene2144	LOC106029819	yellow	0.90371
		gene2145	STK11IP	yellow	0.92856
		gene2146	SLC4A3	yellow	0.97973
		gene2160	IFIH1	green	0.90934
		gene2185	STK39	turquoise	0.90938
		gene2216	METTL8	brown	0.96949
		gene2220	SLC25A12	blue	0.94574
		gene2232	CDCA7	turquoise	0.91043
		gene226	PAPSS2	yellow	0.9402
		gene2270	LOC106030024	blue	0.91315
		gene2313	CD28	turquoise	0.95038
		gene2314	CTLA4	turquoise	0.96851
		gene2315	LOC106030066	turquoise	0.95691
		gene2317	PARD3B	blue	0.96203
		gene2357	FZD7	blue	0.95463
		gene2370	ITGB2	turquoise	0.92539
		gene2415	GPNMB	green	0.92544
		gene2428	DFNA5	brown	0.91685
		gene2442	SNX10	turquoise	0.96332
		gene2475	ANKRD28	yellow	0.94725
		gene2480	DPH3	green	0.90959
		gene2496	SGOL1	turquoise	0.92933
		gene25	PPRC1	yellow	0.93116
		gene2505	LOC106030278	blue	0.91666
		gene2519	RARB	blue	0.98067
		gene2585	MYO6	blue	0.91946
		gene2598	KCNQ5	turquoise	0.96168
		gene2646	BMP5	blue	0.988
		gene2647	HMGCLL1	blue	0.97622
		gene2657	LRRC1	green	0.94859
		gene2689	KBTBD11	blue	0.90935
		gene2699	SH3YL1	green	0.93701
		gene2719	TP53INP1	brown	0.90088
		gene2720	CCNE2	turquoise	0.93917
		gene2726	ESRP1	green	0.97097
		gene2730	FSBP	brown	0.91945
		gene2739	RBM12B	turquoise	0.95586
		gene2741	FAM92A1	blue	0.92552
		gene2750	OTUD6B	turquoise	0.9332
		gene2754	NECAB1	blue	0.98213
		gene2761	OSGIN2	turquoise	0.909
		gene2765	RIPK2	yellow	0.90334
		gene2776	RMDN1	brown	0.9338
		gene2809	LOC106030570	blue	0.9316
		gene2826	ZFHX4	blue	0.92658
		gene2836	LY96	turquoise	0.9483
		gene286	CDH23	turquoise	0.90011
		gene2882	MYBL1	turquoise	0.90245
		gene2925	ITGB1BP1	turquoise	0.93289
		gene2944	ATP6V1C2	turquoise	0.90778
		gene2955	TRIB2	yellow	0.94943
		gene2959	FAM84A	green	0.97971
		gene2975	VSNL1	green	0.98137
		gene30	ARHGAP19	turquoise	0.94614
		gene3005	TXK	turquoise	0.96922
		gene3013	CWH43	green	0.93396
		gene3016	SGCB	blue	0.9904
		gene3044	PPAT	turquoise	0.91651
		gene3089	LMO3	brown	0.91015
		gene3094	DERA	blue	0.91078
		gene3117	BID	turquoise	0.93062
		gene3124	IL17RA	yellow	0.94284
		gene313	DNA2	turquoise	0.94303
		gene3187	PTN	yellow	0.91992
		gene3198	LOC106030999	blue	0.94937
		gene3201	DENND2A	blue	0.93623
		gene3205	RAB19	yellow	0.93338
		gene3209	KDM7A	yellow	0.91507
		gene322	DNAJC12	green	0.92323
		gene3227	LOC106031049	green	0.98653
		gene3228	SPIC	turquoise	0.94699
		gene3254	GLTP	green	0.92676
		gene3261	MYO1H	brown	0.9188
		gene3267	ACACB	brown	0.96185
		gene3275	CORO1C	turquoise	0.94041
		gene3276	SELPLG	turquoise	0.91884
		gene3279	FICD	yellow	0.90642
		gene3292	LOC106031104	green	0.93142
		gene3295	ALDH2	blue	0.94636
		gene3324	BCL7A	turquoise	0.96134
		gene3332	RHOF	turquoise	0.904
		gene3340	ANAPC5	brown	0.96517
		gene3342	LOC106031149	blue	0.91051
		gene3345	IFT81	blue	0.94422
		gene3348	LOC106031415	yellow	0.94031
		gene3356	ABCB9	yellow	0.9193
		gene3373	TCTN2	blue	0.91399
		gene34	ZDHHC16	turquoise	0.92127
		gene3401	FZD10	green	0.91892
		gene3414	ULK1	yellow	0.94093
		gene342	RTKN2	turquoise	0.99568
		gene343	ARID5B	yellow	0.94314
		gene3431	LOC106031230	blue	0.9228
		gene3455	CDC45	turquoise	0.93513
		gene349	CDK1	turquoise	0.90375
		gene3514	MED15	turquoise	0.9082
		gene353	CCDC6	blue	0.90891
		gene3533	ANHX	turquoise	0.96118
		gene3538	PISD	yellow	0.91178
		gene354	SLC16A9	brown	0.92907
		gene3544	PIK3IP1	brown	0.92905
		gene3574	CIT	turquoise	0.94718
		gene3578	HSPB8	yellow	0.92795
		gene3660	MRPS10	turquoise	0.95869
		gene3669	TRAF5	turquoise	0.95725
		gene3673	NEK2	turquoise	0.92929
		gene3677	INTS7	turquoise	0.92691
		gene3717	LYPLAL1	brown	0.96432
		gene3749	LIN9	turquoise	0.93846
		gene3754	ADCK3	brown	0.92156
		gene3758	LOC106031598	yellow	0.91022
		gene3764	LCLAT1	blue	0.90631
		gene377	BMPR1A	blue	0.95838
		gene3782	GALNT16	blue	0.90927
		gene3789	ZFP36L1	yellow	0.9137
		gene3796	TMEM229B	turquoise	0.96591
		gene3802	LOC106031772	green	0.92172
		gene3829	ARHGAP11A	turquoise	0.96898
		gene385	GPRIN2	turquoise	0.92967
		gene3858	G2E3	turquoise	0.97978
		gene3875	NPAS3	blue	0.93453
		gene3886	LOC106031755	green	0.92218
		gene3889	IRF7	green	0.96282
		gene3891	PIDD1	turquoise	0.91989
		gene3899	TSPAN4	blue	0.9397
		gene3921	GPR18	turquoise	0.90012
		gene3953	LOC106031833	yellow	0.97603
		gene3954	LOC106031832	yellow	0.95314
		gene3958	TRIM8	yellow	0.95319
		gene3968	TAF5	turquoise	0.95352
		gene3981	COL17A1	green	0.97334
		gene4021	ADRA2A	yellow	0.92791
		gene4029	ACSL5	turquoise	0.91729
		gene4032	TCF7L2	blue	0.957
		gene4052	ATRNL1	blue	0.9125
		gene4085	LRRC34	turquoise	0.93574
		gene410	LOC106032461	turquoise	0.92234
		gene4102	PLD1	yellow	0.92336
		gene4110	ECT2	turquoise	0.92486
		gene4152	LAMP3	turquoise	0.956
		gene4154	B3GNT5	turquoise	0.90428
		gene4181	CARD11	turquoise	0.91376
		gene42	CRTAC1	green	0.93788
		gene423	TMEM254	green	0.95104
		gene4253	SLC5A10	turquoise	0.94291
		gene4254	FAM83G	green	0.91319
		gene4266	LMF1	blue	0.97543
		gene4269	LOC106032129	turquoise	0.92708
		gene4280	FAHD1	brown	0.91714
		gene4315	EDNRA	brown	0.94881
		gene4317	PRMT9	turquoise	0.93817
		gene4319	NR3C2	blue	0.93253
		gene4341	FHDC1	green	0.97135
		gene4343	TRIM2	blue	0.96721
		gene4491	HINT3	brown	0.91679
		gene4502	LOC106032484	brown	0.90275
		gene4508	LAMA2	blue	0.92124
		gene4545	MYB	turquoise	0.90256
		gene4552	MTFR2	turquoise	0.9561
		gene4555	MAP7	green	0.93047
		gene4566	LOC106032402	green	0.95524
		gene4572	NHSL1	blue	0.93396
		gene4576	ABRACL	turquoise	0.92767
		gene4580	CITED2	brown	0.95029
		gene4609	REV3L	yellow	0.91319
		gene462	AP3M1	turquoise	0.93017
		gene4637	FOXO3	yellow	0.91117
		gene4642	OSTM1	turquoise	0.96541
		gene4645	SOBP	blue	0.94122
		gene4649	QRSL1	turquoise	0.94077
		gene4651	AIM1	green	0.96473
		gene4693	EGR1	yellow	0.9086
		gene4700	CDC23	turquoise	0.9671
		gene4710	SH3RF2	green	0.98702
		gene4772	TCF7	turquoise	0.90938
		gene4787	PITX1	green	0.93162
		gene4795	LOC106032655	green	0.94091
		gene4820	CLK4	turquoise	0.91815
		gene4828	CNOT6	turquoise	0.97224
		gene4829	LOC106032902	blue	0.90294
		gene4853	ARSI	blue	0.92883
		gene4861	DCTN4	blue	0.91266
		gene4867	CCDC69	turquoise	0.96737
		gene4903	LOC106032855	turquoise	0.9027
		gene4907	CYFIP2	turquoise	0.90987
		gene4909	NIPAL4	green	0.98253
		gene4910	ADAM19	yellow	0.91187
		gene4919	EBF1	blue	0.92707
		gene4932	THOC3	turquoise	0.91931
		gene4939	RNF44	turquoise	0.92047
		gene4941	ROR1	blue	0.94758
		gene4956	NFIA	blue	0.95177
		gene4965	JUN	yellow	0.94327
		gene497	CD8A	turquoise	0.92072
		gene4973	PRKAA2	brown	0.95603
		gene5042	BEND5	brown	0.91568
		gene5049	TRABD2B	blue	0.93508
		gene5054	STIL	turquoise	0.94181
		gene5059	LOC106032947	blue	0.98054
		gene5084	IPP	turquoise	0.9163
		gene5098	ZSWIM5	yellow	0.95315
		gene5106	PLK3	yellow	0.96593
		gene5109	KIF2C	turquoise	0.91171
		gene5116	DMAP1	turquoise	0.91194
		gene5119	WDR59	turquoise	0.91036
		gene5120	FA2H	green	0.94823
		gene513	SPON2	blue	0.94476
		gene5134	CMTR2	green	0.9027
		gene5161	LOC106033135	turquoise	0.95071
		gene5173	E2F4	turquoise	0.97695
		gene5176	PSKH1	turquoise	0.95346
		gene5179	CENPT	turquoise	0.97985
		gene5181	RANBP10	yellow	0.91305
		gene5198	GFOD2	turquoise	0.94675
		gene5247	KCTD15	blue	0.90511
		gene525	SLBP	turquoise	0.90019
		gene5295	WWOX	blue	0.98946
		gene530	FGFR3	brown	0.91278
		gene5305	CENPN	turquoise	0.94469
		gene5329	LOC106033340	blue	0.94717
		gene5334	NUBP2	turquoise	0.93917
		gene5346	LOC106033391	turquoise	0.95321
		gene5347	45547	turquoise	0.97631
		gene5356	NLRC3	turquoise	0.92379
		gene5370	CDIP1	brown	0.91264
		gene5420	MPV17L	turquoise	0.9059
		gene5460	LOC106033473	brown	0.94415
		gene5464	DCUN1D3	yellow	0.91266
		gene548	TNIP2	yellow	0.95794
		gene5481	CDR2	yellow	0.9075
		gene5491	CYTH3	blue	0.92099
		gene5505	BAIAP2L1	brown	0.96588
		gene5508	NPTX2	brown	0.96322
		gene5520	PRKAR1B	brown	0.92057
		gene5521	DNAAF5	turquoise	0.91565
		gene5524	ADAP1	turquoise	0.96315
		gene5530	GPER1	turquoise	0.9369
		gene5558	LOC106033637	green	0.93836
		gene556	GRK4	turquoise	0.96985
		gene557	LOC106034660	turquoise	0.99052
		gene5579	SEMA6D	brown	0.97605
		gene5593	LOC106033657	blue	0.91473
		gene5597	MAPK6	yellow	0.96571
		gene5616	RAB27A	turquoise	0.9383
		gene5639	AQP9	brown	0.9221
		gene5643	ADAM10	turquoise	0.90669
		gene5647	CCNB2	turquoise	0.94934
		gene5673	OTUD7A	turquoise	0.91743
		gene5700	TLN2	blue	0.96845
		gene5706	LOC106033758	turquoise	0.91302
		gene5740	LPXN	turquoise	0.92593
		gene576	ACOX3	brown	0.90917
		gene5814	PRRG4	green	0.92411
		gene5831	LOC106033848	brown	0.92937
		gene5867	PTPRF	green	0.9481
		gene5871	ELOVL1	yellow	0.93776
		gene5872	CDC20	turquoise	0.90519
		gene5880	PIF1	turquoise	0.91591
		gene5925	RPF1	turquoise	0.92891
		gene5927	SPATA1	blue	0.93485
		gene5934	MCOLN2	turquoise	0.92209
		gene5948	LOC106034001	green	0.99505
		gene5965	LRRC8D	yellow	0.95777
		gene6002	PDGFD	blue	0.92342
		gene601	EVC2	brown	0.97754
		gene6029	CCDC82	brown	0.90877
		gene6031	MAML2	blue	0.94408
		gene6037	ENDOD1	yellow	0.95444
		gene6043	ANKRD49	turquoise	0.91761
		gene6054	LOC106034174	yellow	0.90297
		gene6070	LOC106034162	brown	0.91773
		gene6080	TMEM135	brown	0.91305
		gene6097	ZC3H12D	yellow	0.92872
		gene6107	LOC106034274	green	0.96119
		gene6118	CCDC170	blue	0.96761
		gene6125	FBXO5	turquoise	0.9707
		gene6166	LOC106034313	blue	0.90566
		gene6185	MZB1	turquoise	0.91001
		gene62	LOC106037870	brown	0.93952
		gene6216	DOCK2	turquoise	0.93496
		gene6237	HMMR	turquoise	0.93791
		gene6254	LOC106034391	turquoise	0.95196
		gene6255	PTTG1	turquoise	0.93008
		gene6262	LOC106034367	turquoise	0.95412
		gene6272	SLC26A2	green	0.90791
		gene6275	ARHGEF37	green	0.90669
		gene6293	LOC106034579	blue	0.91949
		gene6301	USP40	turquoise	0.97875
		gene6309	SH3BP4	blue	0.90238
		gene6322	IQCA1	blue	0.95448
		gene6349	ABCA12	green	0.95533
		gene6432	SSTR2	brown	0.93282
		gene645	FGFBP1	green	0.95044
		gene6451	ARSG	blue	0.92266
		gene6473	LOC106034797	brown	0.9149
		gene6475	PITPNC1	turquoise	0.91908
		gene6479	KPNA2	turquoise	0.95285
		gene6487	TEX2	blue	0.92266
		gene6495	RNF135	green	0.90394
		gene6498	CRLF3	turquoise	0.90927
		gene6499	SUZ12	turquoise	0.94437
		gene65	KNDC1	brown	0.9381
		gene6506	RAB11FIP4	yellow	0.96209
		gene6519	HLF	blue	0.97207
		gene6522	STXBP4	blue	0.94275
		gene6553	CHAD	blue	0.91472
		gene6559	LOC106034831	turquoise	0.90174
		gene6563	NAT9	brown	0.92882
		gene658	NCAPG	turquoise	0.94663
		gene6590	NUP85	turquoise	0.9136
		gene6611	UNK	brown	0.90599
		gene6621	EVPL	green	0.98289
		gene6630	UBE2O	turquoise	0.90872
		gene6641	METTL23	yellow	0.94464
		gene6659	TFAP2A	green	0.96125
		gene6673	DSP	green	0.97443
		gene6683	F13A1	blue	0.95142
		gene6692	CDYL	blue	0.9453
		gene6723	NDC80	turquoise	0.90046
		gene6724	SMCHD1	turquoise	0.92177
		gene6749	PTPRM	blue	0.92912
		gene6753	MTCL1	yellow	0.96646
		gene6777	SLMO1	yellow	0.97201
		gene6787	CEP192	yellow	0.9281
		gene6808	LOC106035094	blue	0.9772
		gene6809	THSD1	blue	0.96136
		gene6811	CKAP2	turquoise	0.91795
		gene6847	RCBTB2	brown	0.91059
		gene685	CCDC149	blue	0.94052
		gene6855	HTR2A	yellow	0.95336
		gene691	SEPSECS	brown	0.91589
		gene692	PI4K2B	turquoise	0.90935
		gene6929	POMK	brown	0.90466
		gene6943	MICU3	blue	0.92552
		gene6952	LOC106035236	blue	0.97474
		gene6969	LOC106035235	blue	0.92404
		gene6979	SNX25	turquoise	0.90347
		gene6986	CENPU	turquoise	0.93582
		gene6988	CASP3	turquoise	0.94809
		gene7034	LAPTM4B	green	0.93058
		gene7036	MATN2	blue	0.91327
		gene7048	OSR2	blue	0.93299
		gene712	SLC25A29	yellow	0.91327
		gene715	EVL	turquoise	0.9443
		gene7167	PM20D2	brown	0.97738
		gene7177	BACH2	yellow	0.90269
		gene7257	LOC106035461	green	0.95409
		gene7274	PPP4R2	turquoise	0.90954
		gene7285	CHL1	green	0.9663
		gene7299	ARMC10	brown	0.93934
		gene7300	FBXL13	blue	0.92307
		gene7312	MAGI2	blue	0.9101
		gene7363	LOC106035653	blue	0.92941
		gene7378	IL31RA	yellow	0.93524
		gene7400	ZSWIM6	yellow	0.96198
		gene7403	KIF2A	turquoise	0.9616
		gene7410	HTR1A	yellow	0.95217
		gene7411	RNF180	brown	0.9626
		gene7440	MITD1	green	0.93833
		gene7447	UNC50	turquoise	0.94361
		gene7475	LOC106035673	green	0.98686
		gene7487	LOC106035752	turquoise	0.9106
		gene7491	P2RY8	turquoise	0.93255
		gene7500	XG	green	0.9575
		gene7510	PRKX	turquoise	0.90566
		gene7515	NUP37	brown	0.91613
		gene7519	IGF1	blue	0.94312
		gene7565	PWP1	yellow	0.91646
		gene7598	NCF4	turquoise	0.94787
		gene76	BLNK	turquoise	0.98046
		gene7603	MPST	brown	0.94722
		gene7610	RAC2	turquoise	0.97146
		gene7614	MFNG	turquoise	0.97152
		gene7619	SH3BP1	turquoise	0.96153
		gene7645	DDX17	turquoise	0.9392
		gene765	DDX24	yellow	0.91563
		gene7657	SYNGR1	blue	0.94598
		gene7658	TAB1	turquoise	0.96173
		gene7675	SLC25A17	green	0.91509
		gene7677	XPNPEP3	brown	0.9167
		gene7689	ANKS6	blue	0.97656
		gene7697	SLC39A6	turquoise	0.97953
		gene7705	AHRR	green	0.91332
		gene7713	NR4A3	yellow	0.97123
		gene7723	SCGN	green	0.98692
		gene7726	FAM65B	turquoise	0.95928
		gene7746	ZADH2	turquoise	0.90113
		gene7777	LOC106036118	yellow	0.92902
		gene7782	PWP2	yellow	0.95076
		gene7808	SLC37A1	turquoise	0.96736
		gene7810	UBASH3A	turquoise	0.93044
		gene7822	RIPK4	green	0.98604
		gene7825	LOC106036132	green	0.92807
		gene7841	ETS2	yellow	0.96814
		gene7855	HLCS	brown	0.90242
		gene7956	SCG2	yellow	0.96578
		gene7964	SGPP2	green	0.97939
		gene8005	TTC33	turquoise	0.95554
		gene8011	FYB	turquoise	0.95894
		gene8018	NUP155	turquoise	0.94007
		gene8025	LOC106036387	turquoise	0.94401
		gene8041	SLC45A2	turquoise	0.94516
		gene8061	CA9	green	0.9456
		gene8066	LOC106036393	yellow	0.94863
		gene8089	TICRR	turquoise	0.96056
		gene8093	FANCI	turquoise	0.90315
		gene8096	MFGE8	blue	0.94903
		gene812	TDP1	turquoise	0.91818
		gene8132	MCTP2	yellow	0.95794
		gene8148	ARRDC4	turquoise	0.92186
		gene8159	LOC106036472	green	0.97197
		gene8160	CERS3	green	0.95852
		gene8205	IKZF1	turquoise	0.96862
		gene8232	LOC106036526	green	0.9293
		gene8234	ROPN1L	brown	0.90303
		gene828	GPR65	turquoise	0.97637
		gene8304	XPO1	turquoise	0.91912
		gene8307	AHSA2	turquoise	0.94589
		gene8335	TMCC1	brown	0.94539
		gene8347	IRAK2	yellow	0.93805
		gene8421	LOC106036766	brown	0.90027
		gene8424	SLC4A11	turquoise	0.93671
		gene8447	IBA57	turquoise	0.92989
		gene8478	VILL	blue	0.94592
		gene8487	OXSR1	yellow	0.95849
		gene8494	CSRNP1	yellow	0.94738
		gene8522	LOC106036885	blue	0.92377
		gene8529	ATP2B1	turquoise	0.93479
		gene8543	EEA1	blue	0.93452
		gene8580	APAF1	turquoise	0.93924
		gene86	KIF11	turquoise	0.92144
		gene863	B4GALT3	turquoise	0.90241
		gene8653	SLC25A25	yellow	0.92946
		gene8728	GRIN1	green	0.97264
		gene8729	LRRC26	green	0.94744
		gene8744	TRAF2	turquoise	0.9737
		gene8754	FUT7	turquoise	0.95889
		gene8770	LOC106037228	turquoise	0.9191
		gene8797	SIX4	brown	0.91014
		gene8830	ZBTB25	turquoise	0.92964
		gene8845	GPR132	turquoise	0.94583
		gene8849	AHNAK2	blue	0.94497
		gene885	ZBTB20	blue	0.92953
		gene8850	PLD4	turquoise	0.94313
		gene887	QTRTD1	turquoise	0.91803
		gene888	KIAA1407	brown	0.953
		gene8900	PSTPIP2	yellow	0.91016
		gene8931	SKA1	turquoise	0.93395
		gene8934	ME2	turquoise	0.93834
		gene8935	ELAC1	turquoise	0.91625
		gene8993	LOC106037436	turquoise	0.9617
		gene9031	GDPD2	green	0.97055
		gene9035	LOC106037398	yellow	0.91992
		gene9036	SLC7A3	yellow	0.96374
		gene9039	LOC106037440	brown	0.91544
		gene9042	IL2RG	turquoise	0.93523
		gene9051	ISPD	blue	0.93762
		gene9078	GLCCI1	turquoise	0.92646
		gene9091	DLX5	green	0.92508
		gene9101	LOC106037503	brown	0.96594
		gene9162	LOC106037565	green	0.97015
		gene9163	LOC106037566	green	0.97341
		gene9164	DSG2	green	0.95737
		gene9174	ERCC6L	turquoise	0.92165
		gene9177	SASH3	turquoise	0.95811
		gene9187	ENOX2	turquoise	0.92263
		gene9200	45541	turquoise	0.92936
		gene9248	LOC106037695	brown	0.9342
		gene926	SFT2D2	turquoise	0.92263
		gene9275	GABRE	yellow	0.90058
		gene929	GPR161	blue	0.92712
		gene9293	BTK	turquoise	0.91564
		gene9299	CENPI	turquoise	0.92512
		gene9302	LOC106037716	turquoise	0.9202
		gene9309	MTCP1	blue	0.93852
		gene9335	S100G	green	0.92925
		gene9337	TXLNG	turquoise	0.91749
		gene9357	MAP7D2	green	0.95632
		gene9370	MBTPS2	brown	0.90482
		gene9377	ACOT9	blue	0.9483
		gene9380	LOC106037815	turquoise	0.91448
		gene9393	MTFR1L	turquoise	0.94031
		gene9399	LOC106037954	brown	0.92615
		gene9401	RSRP1	turquoise	0.95407
		gene9404	RUNX3	turquoise	0.91261
		gene9415	IL22RA1	green	0.97171
		gene9419	PNRC2	turquoise	0.91158
		gene9422	HMGCL	turquoise	0.90896
		gene9430	MFSD2A	yellow	0.94241
		gene9433	LOC106037880	turquoise	0.90725
		gene9444	RNF19B	yellow	0.92585
		gene9455	LOC106037963	turquoise	0.9253
		gene9468	LCK	turquoise	0.92745
		gene9470	MARCKSL1	turquoise	0.90197
		gene9490	LOC106037937	green	0.97527
		gene9491	GJB3	green	0.97123
		gene9506	CLSPN	turquoise	0.90575
		gene9507	LOC106037928	turquoise	0.96398
		gene9510	LOC106037932	yellow	0.97371
		gene9519	STK40	yellow	0.97587
		gene9522	CSF3R	yellow	0.92871
		gene9527	ZC3H12A	yellow	0.92985
		gene9535	CDCA8	turquoise	0.93232
		gene9566	PDE12	yellow	0.91745
		gene9619	CENPO	turquoise	0.94103
		gene966	NXPE3	turquoise	0.96686
		gene9675	MCM3	turquoise	0.91543
		gene968	NFKBIZ	yellow	0.95947
		gene9706	ENPP4	turquoise	0.94592
		gene9713	PLA2G7	turquoise	0.97477
		gene9732	LOC106038256	turquoise	0.96281
		gene9740	SSPN	blue	0.91775
		gene9741	ITPR2	turquoise	0.97458
		gene9744	FGFR1OP2	turquoise	0.94255
		gene9759	LOC106038249	turquoise	0.90405
		gene9787	FAM118A	brown	0.92059
		gene9797	LOC106038235	blue	0.91172
		gene9799	LOC106038239	blue	0.92195
		gene9838	TRAK1	blue	0.90046
		gene9845	KIAA1143	blue	0.92495
		gene9846	KIF15	turquoise	0.95907
		gene9852	CDCP1	green	0.90932
		gene9865	FYCO1	blue	0.9597
		gene9866	CXCR6	turquoise	0.91287
		gene9867	XCR1	turquoise	0.92913
		gene9870	LOC106038357	turquoise	0.97448
		gene9871	TOPBP1	turquoise	0.96456
		gene990	KIAA1524	turquoise	0.93249
		gene9911	MCM4	turquoise	0.92419
		gene992	LOC106039194	turquoise	0.92798
		gene993	LOC106039182	turquoise	0.93935
		gene9941	FAM49B	turquoise	0.96734
		gene9944	LOC106038467	turquoise	0.91691
		gene9948	MYC	yellow	0.97576
		gene9954	NSMCE2	yellow	0.92759
		gene9972	WDYHV1	turquoise	0.9072
		gene9973	ATAD2	brown	0.97893
