# Supplementary material for: Transcriptome Profiling Unveils Key Genes Regulating the Growth and Development of Yangzhou Goose Knob
Source: Int J Mol Sci. 2024 Apr 10;25(8):4166. doi: 10.3390/ijms25084166 (PMC11050116; doi:10.3390/ijms25084166)
Supplement: Supplementary file 1 [file ijms-25-04166-s001.zip › Table S11.xlsx]

## Sheet: Sheet1
Table S11 Goose knob Production Statistics
sample	group	length	width	height
D701	1	0	0	0
D702	1	0	0	0
D703	1	0	0	0
D1201	2	19.5	36.1	15.5
D1202	2	19.8	31.9	12.9
D1203	2	19.3	32.5	16.6
D3001	3	32.9	40.8	29.5
D3002	3	28.2	34	30.8
D3003	3	32.3	34.7	30.8
Note: Through our long-term phenotypic observation of goose flocks in the breeding farm, we observed that at 70 days of age, although the crown and base of the goose sarcoid were already in the initial stages of growth and change, we calculated the volume of the goose sarcoma using the drainage method. The size of the goose sarcoma was smaller at 70 days of age, making it challenging to obtain ac…
