# Supplementary material for: Transcriptome Profiling Unveils Key Genes Regulating the Growth and Development of Yangzhou Goose Knob
Source: Int J Mol Sci. 2024 Apr 10;25(8):4166. doi: 10.3390/ijms25084166 (PMC11050116; doi:10.3390/ijms25084166)
Supplement: Supplementary file 1 [file ijms-25-04166-s001.zip › Table S12.xlsx]

## Sheet: Sheet1
Table S12.Sequence of primers.
Gene	accession number	Primer(5’-3’)	TM (℃)	product length
ALX1-F	NW_025927680.1	TGACAGCTACCCCCAGATTC	58.8	134
ALX1-R		AATCTGTCCGGGGTGAATGG
BMP5-F	NW_025927763.1	AGAGCAGAGGGATACGGA	56.22	110
BMP5-R		GCTGGCTAAGGGAGGATT
IGF1-F	NW_025927662.1	TGCAATAAGGTGGATGGATAGCC	51.87	196
IGF1-R		CTTCTTTACAGGTGACCAAGGGA
IGFBP4-F	NW_025927970.1	CGAAATGTTTTGGTGCTCGTGA	60.2	139
IGFBP4-R		CGAAATGTTTTGGTGCTCGTGA
ITGA11-F	NW_025927816.1	CCAAGGACGGTTTTACACAGGTA	58.46	156
ITGA11-R		CAACGTTCTGGATTGCTCTACTG
MATN2-F	NW_025927707.1	CAGTTCAACTCAGCCAAAGACATG	57.14	163
MATN2-R		CAATAGCGATTCGAGGGACATTTG
NPPC-F	NW_025927753.1	CTGGAGTTGCTGTTATTCTGGGA	56.88	166
NPPC-R		GCAGCTCTCGGTATATTTTGGTC
TEX36-F	NW_025927662.1	CCCATTCTGTAGGCGATATCCAA	59.83	164
TEX36-R		GTTCAGATCTCCAGAAAAGGCTC
GAPDH-F	NW_025927922.1	GCTGATGCTCCCATGTTCGTGAT	60.4	86
GAPDH-R		GTGGTGCAAGAGGCATTGCTGAC
